# Supplementary material for: The polysaccharide–peptide complex from mushroom Cordyceps militaris ameliorates atherosclerosis by modulating the lncRNA–miRNA–mRNA axis
Source: Royal Society of Chemistry journal article supplement (doi:10.1039/d1fo03285b), 2022-01-01
Supplement: d1fo03285b1.xlsx [file d1fo03285b1.xlsx]

## Sheet: diffgene.anno
probeset_id	CMPS80	Model	Fold Change	ANOVA p-value	Entrez ID	Gene Symbol	Description	mRNA Accession	mRNA Source	mRNA Description	Chromosome	Type
TC0100000008.mm.1	9.71758	10.334	-1.53309	0.0448509		Gm22307	predicted gene, 22307 [Source:MGI Symbol;Acc:MGI:5452084]	ENSMUST00000180019	ENSEMBL	predicted gene, 22307 [gene_biotype:snRNA transcript_biotype:snRNA]	chr1	ncrna
TC0100000059.mm.1	9.15455	9.93835	-1.72166	0.0492642		Gm22633	predicted gene, 22633 [Source:MGI Symbol;Acc:MGI:5452410]	ENSMUST00000179834	ENSEMBL	predicted gene, 22633 [gene_biotype:snRNA transcript_biotype:snRNA]	chr1	ncrna
TC0100000103.mm.1	5.32038	4.00224	2.49344	0.000684495	17087	Ly96	lymphocyte antigen 96; lymphocyte antigen 96	NM_001159711; NM_016923; ENSMUST00000026881; BC116785; NM_001159711.1; NM_016923.2; uc007ajz.2; uc011wim.1	RefSeq; ENSEMBL; GenBank; MGI/Jackson Lab; UCSC Genes	Mus musculus lymphocyte antigen 96 (Ly96), transcript variant 2, mRNA.; Mus musculus lymphocyte antigen 96 (Ly96), transcript variant 1, mRNA.; lymphocyte antigen 96 [gene_biotype:protein_coding transcript_biotype:protein_coding]; Mus musculus lymphocyte antigen 96, mRNA (cDNA clone MGC:151162 IMAGE:40126104), complete cds.; lymphocyte antigen 96	chr1	coding
TC0100000135.mm.1	8.62948	7.81888	1.75395	0.0010179	14859	Gsta3	glutathione S-transferase, alpha 3; glutathione S-transferase, alpha 3	NM_001077353; NM_001288617; NM_010356; ENSMUST00000027067; ENSMUST00000121676; ENSMUST00000124990; BC147272; BC147273; NM_001077353.1; NM_010356.3; OTTMUST00000065121; OTTMUST00000065122; OTTMUST00000065123; uc007alk.1; uc007all.1; NONMMUT000314	RefSeq; ENSEMBL; GenBank; MGI/Jackson Lab; Havana transcript; UCSC Genes; NONCODE	Mus musculus glutathione S-transferase, alpha 3 (Gsta3), transcript variant 1, mRNA.; Mus musculus glutathione S-transferase, alpha 3 (Gsta3), transcript variant 3, mRNA.; Mus musculus glutathione S-transferase, alpha 3 (Gsta3), transcript variant 2, mRNA.; glutathione S-transferase, alpha 3 [gene_biotype:protein_coding transcript_biotype:protein_coding]; Mus musculus glutathione S-transferase, a…	chr1	coding
TC0100000251.mm.1	8.67686	7.93161	1.67627	0.00112649		Gm6428	predicted pseudogene 6428 [Source:MGI Symbol;Acc:MGI:3649065]	ENSMUST00000161062; OTTMUST00000087260	ENSEMBL; Havana transcript	predicted pseudogene 6428 [gene_biotype:processed_pseudogene transcript_biotype:processed_pseudogene]; eukaryotic translation initiation factor 1 (Eif1) pseudogene[gene_biotype:processed_pseudogene transcript_biotype:processed_pseudogene]	chr1	ncrna
TC0100000256.mm.1	7.8461	8.97781	-2.19118	0.0205026		n-R5s210	nuclear encoded rRNA 5S 210 [Source:MGI Symbol;Acc:MGI:4422075]	ENSMUST00000177688	ENSEMBL	nuclear encoded rRNA 5S 210 [gene_biotype:rRNA transcript_biotype:rRNA]	chr1	ncrna
TC0100000282.mm.1	5.11335	4.03178	2.11633	0.00161782	18143	Npas2	neuronal PAS domain protein 2; neuronal PAS domain protein 2	NM_008719; ENSMUST00000056815; ENSMUST00000172825; ENSMUST00000173050; BC109166; NM_008719.2; OTTMUST00000094904; OTTMUST00000094905; OTTMUST00000094906; NONMMUT000674; uc007atd.2	RefSeq; ENSEMBL; GenBank; MGI/Jackson Lab; Havana transcript; NONCODE; UCSC Genes	Mus musculus neuronal PAS domain protein 2 (Npas2), mRNA.; neuronal PAS domain protein 2 [gene_biotype:protein_coding transcript_biotype:protein_coding]; neuronal PAS domain protein 2 [gene_biotype:protein_coding transcript_biotype:processed_transcript]; Mus musculus neuronal PAS domain protein 2, mRNA (cDNA clone MGC:129355 IMAGE:40048145), complete cds.; neuronal PAS domain protein 2 ; neuronal…	chr1	coding
TC0100000346.mm.1	7.3356	6.57793	1.69077	0.0184813				uc029qoc.1	UCSC Genes	Mus musculus non-coding RNA, oocyte_clustered_small_RNA8675, complete sequence.	chr1	ncrna
TC0100000354.mm.1	8.65887	9.38347	-1.65244	0.0333575		n-R5s211	nuclear encoded rRNA 5S 211 [Source:MGI Symbol;Acc:MGI:4422076]	ENSMUST00000093689	ENSEMBL	nuclear encoded rRNA 5S 211 [gene_biotype:rRNA transcript_biotype:rRNA]	chr1	ncrna
TC0100000372.mm.1	5.22259	4.49639	1.65428	0.028344	20324	Sdpr	serum deprivation response; serum deprivation response	NM_138741; ENSMUST00000051572; BC020008; BC027005; NM_138741.1; uc007axk.1	RefSeq; ENSEMBL; GenBank; MGI/Jackson Lab; UCSC Genes	Mus musculus serum deprivation response (Sdpr), mRNA.; serum deprivation response [gene_biotype:protein_coding transcript_biotype:protein_coding]; Mus musculus serum deprivation response, mRNA (cDNA clone MGC:25726 IMAGE:3980310), complete cds.; Mus musculus serum deprivation response, mRNA (cDNA clone MGC:38919 IMAGE:5362530), complete cds.; serum deprivation response	chr1	coding
TC0100000440.mm.1	7.01889	6.22717	1.73114	0.0138296	12370	Casp8	caspase 8; caspase 8	NM_001080126; NM_001277926; NM_009812; ENSMUST00000027189; ENSMUST00000165549; BC006737; BC049955; NM_001080126.1; NM_009812.2; uc007bcs.1; uc007bct.1	RefSeq; ENSEMBL; GenBank; MGI/Jackson Lab; UCSC Genes	Mus musculus caspase 8 (Casp8), transcript variant 2, mRNA.; Mus musculus caspase 8 (Casp8), transcript variant 3, mRNA.; Mus musculus caspase 8 (Casp8), transcript variant 1, mRNA.; caspase 8 [gene_biotype:protein_coding transcript_biotype:protein_coding]; Mus musculus caspase 8, mRNA (cDNA clone MGC:11440 IMAGE:3964119), complete cds.; Mus musculus caspase 8, mRNA (cDNA clone MGC:59027 IMAGE:42…	chr1	coding
TC0100000521.mm.1	5.14307	6.66259	-2.86697	0.0363336	100217464	Snora41	small nucleolar RNA, H/ACA box 41; small nucleolar RNA, H/ACA box 41	NR_028558; NR_028558.1; ENSMUST00000082668; uc011wme.1	RefSeq; MGI/Jackson Lab; ENSEMBL; UCSC Genes	Mus musculus small nucleolar RNA, H/ACA box 41 (Snora41), small nucleolar RNA.; small nucleolar RNA, H/ACA box 41 ; small nucleolar RNA, H/ACA box 41 [gene_biotype:snoRNA transcript_biotype:snoRNA]	chr1	ncrna
TC0100000596.mm.1	7.4833	8.3958	-1.88231	0.0372499		Gm25360	predicted gene, 25360 [Source:MGI Symbol;Acc:MGI:5455137]	ENSMUST00000178786	ENSEMBL	predicted gene, 25360 [gene_biotype:snRNA transcript_biotype:snRNA]	chr1	ncrna
TC0100000598.mm.1	8.25003	9.18817	-1.91606	0.0362082		Gm23472	predicted gene, 23472 [Source:MGI Symbol;Acc:MGI:5453249]	ENSMUST00000101806	ENSEMBL	predicted gene, 23472 [gene_biotype:snRNA transcript_biotype:snRNA]	chr1	ncrna
TC0100000599.mm.1	8.2756	9.18952	-1.88415	0.0335945		Gm24497	predicted gene, 24497 [Source:MGI Symbol;Acc:MGI:5454274]	ENSMUST00000177868	ENSEMBL	predicted gene, 24497 [gene_biotype:snRNA transcript_biotype:snRNA]	chr1	ncrna
TC0100000600.mm.1	7.84492	8.84881	-2.00539	0.0432011		Gm25939	predicted gene, 25939 [Source:MGI Symbol;Acc:MGI:5455716]	ENSMUST00000179876	ENSEMBL	predicted gene, 25939 [gene_biotype:snRNA transcript_biotype:snRNA]	chr1	ncrna
TC0100000610.mm.1	9.23266	8.00524	2.34147	0.012076	16008	Igfbp2	insulin-like growth factor binding protein 2; insulin-like growth factor binding protein 2	NM_008342; ENSMUST00000047328; ENSMUST00000120564; ENSMUST00000155703; BC012724; BC054473; NM_008342.3; OTTMUST00000073338; OTTMUST00000073339; OTTMUST00000073340; uc007bkw.2	RefSeq; ENSEMBL; GenBank; MGI/Jackson Lab; Havana transcript; UCSC Genes	Mus musculus insulin-like growth factor binding protein 2 (Igfbp2), transcript variant 1, mRNA.; insulin-like growth factor binding protein 2 [gene_biotype:protein_coding transcript_biotype:protein_coding]; insulin-like growth factor binding protein 2 [gene_biotype:protein_coding transcript_biotype:retained_intron]; Mus musculus insulin-like growth factor binding protein 2, mRNA (cDNA clone MGC:1…	chr1	coding
TC0100000627.mm.1	6.83678	6.22763	1.52536	0.00310289	56695	Pnkd	paroxysmal nonkinesiogenic dyskinesia; paroxysmal nonkinesiogenic dyskinesia	NM_001039509; NM_019999; NM_025580; ENSMUST00000027370; ENSMUST00000087225; ENSMUST00000087226; ENSMUST00000113805; ENSMUST00000129219; ENSMUST00000138620; ENSMUST00000152492; BC058945; NM_001039509.1; NM_019999.2; NM_025580.2; OTTMUST00000051553; OTTMUST00000051554; OTTMUST00000051555; OTTMUST00000051563; OTTMUST00000051564; OTTMUST00000051565; OTTMUST00000051566; NONMMUT001520; NONMMUT001521; N…	RefSeq; ENSEMBL; GenBank; MGI/Jackson Lab; Havana transcript; NONCODE; UCSC Genes	Mus musculus paroxysmal nonkinesiogenic dyskinesia (Pnkd), transcript variant 3, mRNA.; Mus musculus paroxysmal nonkinesiogenic dyskinesia (Pnkd), transcript variant 1, mRNA.; Mus musculus paroxysmal nonkinesiogenic dyskinesia (Pnkd), transcript variant 2, mRNA.; paroxysmal nonkinesiogenic dyskinesia [gene_biotype:protein_coding transcript_biotype:protein_coding]; paroxysmal nonkinesiogenic dyski…	chr1	coding
TC0100001139.mm.1	5.27515	4.53395	1.67157	0.0167275				NONMMUT002502	NONCODE	Non-coding transcript identified by NONCODE: Sense No Exonic	chr1	ncrna
TC0100001180.mm.1	6.16293	5.54937	1.53003	0.0005615	212980	Slc45a3	solute carrier family 45, member 3; solute carrier family 45, member 3	NM_001177628; NM_145977; ENSMUST00000027695; ENSMUST00000177943; BC031381; NM_001177628.1; NM_145977.1; uc007cnz.1; uc007coa.1	RefSeq; ENSEMBL; GenBank; MGI/Jackson Lab; UCSC Genes	Mus musculus solute carrier family 45, member 3 (Slc45a3), transcript variant 2, mRNA.; Mus musculus solute carrier family 45, member 3 (Slc45a3), transcript variant 1, mRNA.; solute carrier family 45, member 3 [gene_biotype:protein_coding transcript_biotype:protein_coding]; Mus musculus solute carrier family 45, member 3, mRNA (cDNA clone MGC:32471 IMAGE:5050610), complete cds.; solute carrier f…	chr1	coding
TC0100001499.mm.1	4.76369	5.47191	-1.63379	0.00357772		Gm16588	predicted gene 16588 [Source:MGI Symbol;Acc:MGI:4415008]	ENSMUST00000162889; NONMMUT003540; OTTMUST00000088482	ENSEMBL; NONCODE; Havana transcript	predicted gene 16588 [gene_biotype:processed_pseudogene transcript_biotype:processed_pseudogene]; Non-coding transcript identified by NONCODE: Sense No Exonic; Novel pseudogene[gene_biotype:processed_pseudogene transcript_biotype:processed_pseudogene]	chr1	ncrna
TC0100001526.mm.1	9.29308	8.60931	1.60634	0.00313283	433375	Creg1	cellular repressor of E1A-stimulated genes 1; cellular repressor of E1A-stimulated genes 1	NM_011804; ENSMUST00000040298; ENSMUST00000111432; ENSMUST00000140769; BC027426; NM_011804.2; OTTMUST00000051208; OTTMUST00000051209; OTTMUST00000051210; uc007djm.1; uc011wvb.1	RefSeq; ENSEMBL; GenBank; MGI/Jackson Lab; Havana transcript; UCSC Genes	Mus musculus cellular repressor of E1A-stimulated genes 1 (Creg1), mRNA.; cellular repressor of E1A-stimulated genes 1 [gene_biotype:protein_coding transcript_biotype:protein_coding]; cellular repressor of E1A-stimulated genes 1 [gene_biotype:protein_coding transcript_biotype:nonsense_mediated_decay]; Mus musculus cellular repressor of E1A-stimulated genes 1, mRNA (cDNA clone MGC:36084 IMAGE:3670…	chr1	coding
TC0100001575.mm.1	9.72989	10.3749	-1.56373	0.0288356		Gm26110	predicted gene, 26110 [Source:MGI Symbol;Acc:MGI:5455887]	ENSMUST00000083971	ENSEMBL	predicted gene, 26110 [gene_biotype:snRNA transcript_biotype:snRNA]	chr1	ncrna
TC0100001625.mm.1	2.61382	3.45982	-1.79751	0.0190325	18313	Olfr16	olfactory receptor 16; olfactory receptor 16	NM_008763; ENSMUST00000038432; BC119298; BC119300; NM_008763.2; uc007dqz.2	RefSeq; ENSEMBL; GenBank; MGI/Jackson Lab; UCSC Genes	Mus musculus olfactory receptor 16 (Olfr16), mRNA.; olfactory receptor 16 [gene_biotype:protein_coding transcript_biotype:protein_coding]; Mus musculus olfactory receptor 16, mRNA (cDNA clone MGC:155614 IMAGE:8734047), complete cds.; Mus musculus olfactory receptor 16, mRNA (cDNA clone MGC:155616 IMAGE:8734049), complete cds.; olfactory receptor 16	chr1	coding
TC0100001680.mm.1	4.94614	4.19301	1.68545	0.00021321	78825	Desi2	desumoylating isopeptidase 2; desumoylating isopeptidase 2	NM_024282; ENSMUST00000027783; ENSMUST00000159284; ENSMUST00000161075; BC002200; BC046816; NM_024282.3; OTTMUST00000073574; OTTMUST00000073575; OTTMUST00000073644; NONMMUT003953; uc007dux.1; uc011wxk.1	RefSeq; ENSEMBL; GenBank; MGI/Jackson Lab; Havana transcript; NONCODE; UCSC Genes	Mus musculus desumoylating isopeptidase 2 (Desi2), mRNA.; desumoylating isopeptidase 2 [gene_biotype:protein_coding transcript_biotype:protein_coding]; Mus musculus PPPDE peptidase domain containing 1, mRNA (cDNA clone MGC:7435 IMAGE:3489351), complete cds.; Mus musculus PPPDE peptidase domain containing 1, mRNA (cDNA clone MGC:61384 IMAGE:5702476), complete cds.; desumoylating isopeptidase 2 ; n…	chr1	coding
TC0100001681.mm.1	3.16977	2.56066	1.52532	0.00266688				NONMMUT003947; NONMMUT003948; NONMMUT003949; NONMMUT003950	NONCODE	Non-coding transcript identified by NONCODE: Sense No Exonic	chr1	ncrna
TC0100001682.mm.1	5.10186	4.40051	1.62603	0.0023651				NONMMUT003951	NONCODE	Non-coding transcript identified by NONCODE: Sense No Exonic	chr1	ncrna
TC0100001683.mm.1	4.02986	3.00351	2.03688	3.79631e-05				NONMMUT003952	NONCODE	Non-coding transcript identified by NONCODE: Sense No Exonic	chr1	ncrna
TC0100001693.mm.1	8.07794	8.97544	-1.86284	0.0249845		Gm24405	predicted gene, 24405 [Source:MGI Symbol;Acc:MGI:5454182]	ENSMUST00000083033	ENSEMBL	predicted gene, 24405 [gene_biotype:snRNA transcript_biotype:snRNA]	chr1	ncrna
TC0100001726.mm.1	4.938	4.04244	1.86033	0.0137148	619326	9130409I23Rik	RIKEN cDNA 9130409I23 gene; RIKEN cDNA 9130409I23 gene	NM_001033819; ENSMUST00000036819; BC147378; BC147379; NM_001033819.2; uc007dxa.1	RefSeq; ENSEMBL; GenBank; MGI/Jackson Lab; UCSC Genes	Mus musculus RIKEN cDNA 9130409I23 gene (9130409I23Rik), mRNA.; RIKEN cDNA 9130409I23 gene [gene_biotype:protein_coding transcript_biotype:protein_coding]; Mus musculus RIKEN cDNA 9130409I23 gene, mRNA (cDNA clone MGC:182559 IMAGE:9056453), complete cds.; Mus musculus RIKEN cDNA 9130409I23 gene, mRNA (cDNA clone MGC:182555 IMAGE:9056449), complete cds.; RIKEN cDNA 9130409I23 gene	chr1	coding
TC0100001788.mm.1	6.57054	5.3049	2.40434	0.0303675	226781	Slc30a10	solute carrier family 30, member 10; solute carrier family 30, member 10 ; solute carrier family 30, member 10 (Slc30a10), mRNA.	NM_001033286; ENSMUST00000061093; NM_001033286.2; uc007dzl.1; NONMMUT004212; uc007dzk.1	RefSeq; ENSEMBL; MGI/Jackson Lab; UCSC Genes; NONCODE	Mus musculus solute carrier family 30, member 10 (Slc30a10), mRNA.; solute carrier family 30, member 10 [gene_biotype:protein_coding transcript_biotype:protein_coding]; solute carrier family 30, member 10 ; solute carrier family 30, member 10 (Slc30a10), mRNA.; Non-coding transcript identified by NONCODE: Exonic	chr1	coding
TC0100001873.mm.1	3.53218	2.82327	1.63457	0.0148274				NONMMUT004450	NONCODE	Non-coding transcript identified by NONCODE: Linc	chr1	ncrna
TC0100001878.mm.1	3.68624	2.77621	1.87909	0.0159983				NONMMUT004480	NONCODE	Non-coding transcript identified by NONCODE: Sense No Exonic	chr1	ncrna
TC0100002038.mm.1	6.48193	5.76628	1.64222	0.00351851	170829	Tram2	translocating chain-associating membrane protein 2; translocating chain-associating membrane protein 2	NM_177409; ENSMUST00000037998; BC018212; NM_133252.2; NM_177409.3; OTTMUST00000065709; uc007alg.1; NONMMUT000311	RefSeq; ENSEMBL; GenBank; MGI/Jackson Lab; Havana transcript; UCSC Genes; NONCODE	Mus musculus translocating chain-associating membrane protein 2 (Tram2), mRNA.; translocating chain-associating membrane protein 2 [gene_biotype:protein_coding transcript_biotype:protein_coding]; Mus musculus translocating chain-associating membrane protein 2, mRNA (cDNA clone MGC:25725 IMAGE:3980004), complete cds.; translocating chain-associating membrane protein 2 ; translocating chain-associa…	chr1	coding
TC0100002103.mm.1	6.28585	6.94834	-1.58281	0.0304537		n-R5s209	nuclear encoded rRNA 5S 209 [Source:MGI Symbol;Acc:MGI:4422074]	ENSMUST00000179494	ENSEMBL	nuclear encoded rRNA 5S 209 [gene_biotype:rRNA transcript_biotype:rRNA]	chr1	ncrna
TC0100002398.mm.1	3.29962	4.15758	-1.81247	0.00596754				NONMMUT001083; NONMMUT001084; NovelTID_00000250; NovelTID_00000251	NONCODE; Luo lincRNA	Non-coding transcript identified by NONCODE: Linc; Non-coding transcript identified by Luo, et al.	chr1	ncrna
TC0100002412.mm.1	5.39318	6.51763	-2.18018	0.0129911				NONMMUT001136	NONCODE	Non-coding transcript identified by NONCODE: Antisense	chr1	ncrna
TC0100002495.mm.1	9.02921	8.23997	1.72816	0.0028287	11363	Acadl	acyl-Coenzyme A dehydrogenase, long-chain; acyl-Coenzyme A dehydrogenase, long-chain	NM_007381; ENSMUST00000027153; ENSMUST00000139208; BC027412; NM_007381.3; OTTMUST00000064849; OTTMUST00000064850; uc007bir.1	RefSeq; ENSEMBL; GenBank; MGI/Jackson Lab; Havana transcript; UCSC Genes	Mus musculus acyl-Coenzyme A dehydrogenase, long-chain (Acadl), mRNA.; acyl-Coenzyme A dehydrogenase, long-chain [gene_biotype:protein_coding transcript_biotype:protein_coding]; acyl-Coenzyme A dehydrogenase, long-chain [gene_biotype:protein_coding transcript_biotype:processed_transcript]; Mus musculus acyl-Coenzyme A dehydrogenase, long-chain, mRNA (cDNA clone MGC:36219 IMAGE:4236225), complete …	chr1	coding
TC0100002501.mm.1	3.72263	4.33554	-1.52933	0.00850512				NONMMUT001344; NONMMUT001345; NONMMUT001346; NONMMUT001347; NONMMUT001348; NONMMUT001349; NONMMUT001350; NONMMUT001351; NovelTID_00000259; NovelTID_00000260; NovelTID_00000261; NovelTID_00000262; NovelTID_00000263; NovelTID_00000264; NovelTID_00000265	NONCODE; Luo lincRNA	Non-coding transcript identified by NONCODE: Linc; Non-coding transcript identified by Luo, et al.	chr1	ncrna
TC0100002538.mm.1	2.23233	3.00204	-1.70492	0.0152042		Gm23879	predicted gene, 23879 [Source:MGI Symbol;Acc:MGI:5453656]	ENSMUST00000116874	ENSEMBL	predicted gene, 23879 [gene_biotype:snRNA transcript_biotype:snRNA]	chr1	ncrna
TC0100002604.mm.1	8.04549	7.07654	1.95742	0.00626406	22145	Tuba4a	tubulin, alpha 4A; tubulin, alpha 4A	NM_009447; ENSMUST00000079464; BC019959; NM_009447.3; uc007bok.1	RefSeq; ENSEMBL; GenBank; MGI/Jackson Lab; UCSC Genes	Mus musculus tubulin, alpha 4A (Tuba4a), transcript variant 1, mRNA.; tubulin, alpha 4A [gene_biotype:protein_coding transcript_biotype:protein_coding]; Mus musculus tubulin, alpha 4A, mRNA (cDNA clone MGC:18926 IMAGE:3597093), complete cds.; tubulin, alpha 4A ; Mus musculus tubulin, alpha 4A (Tuba4a), mRNA.	chr1	coding
TC0100002645.mm.1	5.84507	5.14801	1.62119	0.00408842	20720	Serpine2	serine (or cysteine) peptidase inhibitor, clade E, member 2; serine (or cysteine) peptidase inhibitor, clade E, member 2	NM_009255; ENSMUST00000027467; ENSMUST00000153862; BC010675; NM_009255.4; OTTMUST00000051625; OTTMUST00000051626; NONMMUT001651; NONMMUT001653; uc007bqz.2; uc007bra.2	RefSeq; ENSEMBL; GenBank; MGI/Jackson Lab; Havana transcript; NONCODE; UCSC Genes	Mus musculus serine (or cysteine) peptidase inhibitor, clade E, member 2 (Serpine2), mRNA.; serine (or cysteine) peptidase inhibitor, clade E, member 2 [gene_biotype:protein_coding transcript_biotype:protein_coding]; serine (or cysteine) peptidase inhibitor, clade E, member 2 [gene_biotype:protein_coding transcript_biotype:retained_intron]; Mus musculus serine (or cysteine) peptidase inhibitor, c…	chr1	coding
TC0100002695.mm.1	6.38452	5.48718	1.86263	0.003104				NONMMUT001733	NONCODE	Non-coding transcript identified by NONCODE: Sense No Exonic	chr1	ncrna
TC0100002699.mm.1	6.34783	5.3773	1.95955	0.00166971				NONMMUT001739; NONMMUT001740	NONCODE	Non-coding transcript identified by NONCODE: Sense No Exonic	chr1	ncrna
TC0100002709.mm.1	3.93916	3.11392	1.77183	0.0303769				uc029qpt.1	UCSC Genes	Mus musculus non-coding RNA, oocyte_clustered_small_RNA11980, complete sequence.	chr1	ncrna
TC0100002868.mm.1	9.75323	9.0676	1.60841	0.00282275		Gm3531	predicted pseudogene 3531 [Source:MGI Symbol;Acc:MGI:3781708]	ENSMUST00000162698; OTTMUST00000088376	ENSEMBL; Havana transcript	predicted pseudogene 3531 [gene_biotype:processed_pseudogene transcript_biotype:processed_pseudogene]; basic transcription factor 3 (Btf3) pseudogene[gene_biotype:processed_pseudogene transcript_biotype:processed_pseudogene]	chr1	ncrna
TC0100002899.mm.1	6.16239	5.57655	1.50092	0.00438066	70750	Kdsr	3-ketodihydrosphingosine reductase; 3-ketodihydrosphingosine reductase	NM_027534; ENSMUST00000010049; BC023820; NM_027534.2; NONMMUT002239; NONMMUT002240; NONMMUT002241; uc007cgy.2	RefSeq; ENSEMBL; GenBank; MGI/Jackson Lab; NONCODE; UCSC Genes	Mus musculus 3-ketodihydrosphingosine reductase (Kdsr), transcript variant 1, mRNA.; 3-ketodihydrosphingosine reductase [gene_biotype:protein_coding transcript_biotype:protein_coding]; Mus musculus 3-ketodihydrosphingosine reductase, mRNA (cDNA clone MGC:36450 IMAGE:5354804), complete cds.; 3-ketodihydrosphingosine reductase ; Non-coding transcript identified by NONCODE: Exonic; Mus musculus 3-ke…	chr1	coding
TC0100002968.mm.1	4.16643	2.44371	3.30059	0.0287387				KnowTID_00000528; NONMMUT002393	Luo lincRNA; NONCODE	Non-coding transcript identified by Luo, et al.; Non-coding transcript identified by NONCODE: Linc	chr1	ncrna
TC0100002969.mm.1	9.2799	7.10578	4.51312	0.000275459	72999	Insig2	insulin induced gene 2; insulin induced gene 2	NM_001271531; NM_001271532; NM_133748; NM_178082; ENSMUST00000003818; ENSMUST00000071064; ENSMUST00000159085; ENSMUST00000159125; ENSMUST00000159192; ENSMUST00000159528; ENSMUST00000160688; ENSMUST00000160968; ENSMUST00000161068; ENSMUST00000161818; ENSMUST00000162019; ENSMUST00000162582; ENSMUST00000162790; BC015288; BC023067; BC023874; BC024411; NM_133748.1; NM_178082.2; OTTMUST00000088551; OTT…	RefSeq; ENSEMBL; GenBank; MGI/Jackson Lab; Havana transcript; UCSC Genes; NONCODE	Mus musculus insulin induced gene 2 (Insig2), transcript variant 3, mRNA.; Mus musculus insulin induced gene 2 (Insig2), transcript variant 4, mRNA.; Mus musculus insulin induced gene 2 (Insig2), transcript variant 1, mRNA.; Mus musculus insulin induced gene 2 (Insig2), transcript variant 2, mRNA.; insulin induced gene 2 [gene_biotype:protein_coding transcript_biotype:protein_coding]; insulin ind…	chr1	coding
TC0100003045.mm.1	5.73318	5.1245	1.52486	0.00704766				NONMMUT002543; NONMMUT002544; NONMMUT002545	NONCODE	Non-coding transcript identified by NONCODE: Antisense	chr1	ncrna
TC0100003117.mm.1	3.39338	2.79432	1.51473	0.0134409				NONMMUT002702	NONCODE	Non-coding transcript identified by NONCODE: Sense No Exonic	chr1	ncrna
TC0100003171.mm.1	4.36924	3.53731	1.78006	0.000982197				NONMMUT002956	NONCODE	Non-coding transcript identified by NONCODE: Sense No Exonic	chr1	ncrna
TC0100003401.mm.1	8.0322	7.14914	1.84427	0.000408961	14261	Fmo1	flavin containing monooxygenase 1; flavin containing monooxygenase 1	NM_010231; ENSMUST00000046049; ENSMUST00000111518; ENSMUST00000131058; ENSMUST00000134098; ENSMUST00000136120; ENSMUST00000143902; BC011229; NM_010231.2; OTTMUST00000058842; OTTMUST00000058843; OTTMUST00000058844; OTTMUST00000058845; OTTMUST00000058846; OTTMUST00000058847; uc007dgx.1; uc007dgy.1	RefSeq; ENSEMBL; GenBank; MGI/Jackson Lab; Havana transcript; UCSC Genes	Mus musculus flavin containing monooxygenase 1 (Fmo1), mRNA.; flavin containing monooxygenase 1 [gene_biotype:protein_coding transcript_biotype:protein_coding]; flavin containing monooxygenase 1 [gene_biotype:protein_coding transcript_biotype:processed_transcript]; Mus musculus flavin containing monooxygenase 1, mRNA (cDNA clone MGC:18391 IMAGE:4196446), complete cds.; flavin containing monooxyge…	chr1	coding
TC0100003423.mm.1	3.70884	4.51092	-1.74361	0.00920408				NONMMUT003545	NONCODE	Non-coding transcript identified by NONCODE: Sense No Exonic	chr1	ncrna
TC0100003498.mm.1	8.2894	7.60685	1.60497	0.00567185		Gm5265	predicted pseudogene 5265 [Source:MGI Symbol;Acc:MGI:3643416]	ENSMUST00000076828	ENSEMBL	predicted pseudogene 5265 [gene_biotype:processed_pseudogene transcript_biotype:processed_pseudogene]	chr1	ncrna
TC0100003886.mm.1	3.95625	4.94876	-1.98964	0.0172717	665574	Gm7694	predicted gene 7694; predicted gene 7694	NM_001198955; ENSMUST00000179801; NM_001198955.1; uc011wvs.1	RefSeq; ENSEMBL; MGI/Jackson Lab; UCSC Genes	Mus musculus predicted gene 7694 (Gm7694), mRNA.; predicted gene 7694 [gene_biotype:protein_coding transcript_biotype:protein_coding]; predicted gene 7694	chr1	coding
TC0100003528.mm.1	7.65955	6.9565	1.62795	0.00613126	66052	Sdhc	succinate dehydrogenase complex, subunit C, integral membrane protein; succinate dehydrogenase complex, subunit C, integral membrane protein	NM_025321; ENSMUST00000081560; ENSMUST00000111336; ENSMUST00000155798; BC005779; BC083091; NM_025321.3; OTTMUST00000051420; OTTMUST00000051421; OTTMUST00000051422; uc007dnb.2	RefSeq; ENSEMBL; GenBank; MGI/Jackson Lab; Havana transcript; UCSC Genes	Mus musculus succinate dehydrogenase complex, subunit C, integral membrane protein (Sdhc), mRNA.; succinate dehydrogenase complex, subunit C, integral membrane protein [gene_biotype:protein_coding transcript_biotype:protein_coding]; Mus musculus succinate dehydrogenase complex, subunit C, integral membrane protein, mRNA (cDNA clone MGC:6555 IMAGE:2810852), complete cds.; Mus musculus succinate de…	chr1	coding
TC0100003562.mm.1	8.99111	8.34846	1.56119	0.00703964	100041219	Gm10171	predicted gene 10171	ENSMUST00000162990; ENSMUST00000126220; OTTMUST00000074044	ENSEMBL; Havana transcript	predicted gene 10171 ; predicted gene 10171 [gene_biotype:processed_pseudogene transcript_biotype:processed_pseudogene]; translocase of inner mitochondrial membrane 23 (Timm23) pseudogene[gene_biotype:processed_pseudogene transcript_biotype:processed_pseudogene]	chr1	ncrna
TC0100003580.mm.1	7.61317	9.94415	-5.03148	0.0310081	20219	Apcs	serum amyloid P-component; serum amyloid P-component	NM_011318; ENSMUST00000027824; BC061125; NM_011318.2; uc007dqy.2	RefSeq; ENSEMBL; GenBank; MGI/Jackson Lab; UCSC Genes	Mus musculus serum amyloid P-component (Apcs), mRNA.; serum amyloid P-component [gene_biotype:protein_coding transcript_biotype:protein_coding]; Mus musculus serum amyloid P-component, mRNA (cDNA clone MGC:74253 IMAGE:30308397), complete cds.; serum amyloid P-component	chr1	coding
TC0100003654.mm.1	5.09053	5.73456	-1.56269	0.00421099				NONMMUT003989	NONCODE	Non-coding transcript identified by NONCODE: Sense No Exonic	chr1	ncrna
TC0100003893.mm.1	6.16619	5.42765	1.66848	0.00167813	226747	Ahctf1	AT hook containing transcription factor 1; AT hook containing transcription factor 1	NM_026375; ENSMUST00000027768; ENSMUST00000125816; ENSMUST00000127250; ENSMUST00000140489; ENSMUST00000145968; ENSMUST00000147137; ENSMUST00000151734; BC138343; BC138344; NM_026375.2; OTTMUST00000085085; OTTMUST00000085086; OTTMUST00000085087; OTTMUST00000085088; OTTMUST00000085089; OTTMUST00000085090; OTTMUST00000085091; NONMMUT004005; NONMMUT004006; NONMMUT004007; NONMMUT004008; uc007dvq.1; uc0…	RefSeq; ENSEMBL; GenBank; MGI/Jackson Lab; Havana transcript; NONCODE; UCSC Genes	Mus musculus AT hook containing transcription factor 1 (Ahctf1), mRNA.; AT hook containing transcription factor 1 [gene_biotype:protein_coding transcript_biotype:protein_coding]; AT hook containing transcription factor 1 [gene_biotype:protein_coding transcript_biotype:nonsense_mediated_decay]; AT hook containing transcription factor 1 [gene_biotype:protein_coding transcript_biotype:retained_intro…	chr1	coding
TC0100003679.mm.1	10.008	8.92971	2.1115	0.00232446	13849	Ephx1	epoxide hydrolase 1, microsomal; epoxide hydrolase 1, microsomal	NM_010145; ENSMUST00000036928; ENSMUST00000111068; ENSMUST00000147585; ENSMUST00000154133; BC029636; BC045194; BC057857; BC061493; NM_010145.2; OTTMUST00000052194; OTTMUST00000052195; OTTMUST00000078114; OTTMUST00000078115; uc007dwz.1; uc011wxq.1	RefSeq; ENSEMBL; GenBank; MGI/Jackson Lab; Havana transcript; UCSC Genes	Mus musculus epoxide hydrolase 1, microsomal (Ephx1), transcript variant 1, mRNA.; epoxide hydrolase 1, microsomal [gene_biotype:protein_coding transcript_biotype:protein_coding]; Mus musculus epoxide hydrolase 1, microsomal, mRNA (cDNA clone MGC:30577 IMAGE:3491966), complete cds.; Mus musculus epoxide hydrolase 1, microsomal, mRNA (cDNA clone MGC:49074 IMAGE:4986422), complete cds.; Mus musculu…	chr1	coding
TC0100003825.mm.1	10.8413	10.151	1.61369	0.0189353	100042625	Gm3934	PREDICTED: predicted gene 3934 (Gm3934), mRNA.	XM_001478655.3	MGI/Jackson Lab	PREDICTED: predicted gene 3934 (Gm3934), mRNA.	chr1	ncrna
TC0100003836.mm.1	6.73696	6.0702	1.5875	0.00360464	15483	Hsd11b1	hydroxysteroid 11-beta dehydrogenase 1; hydroxysteroid 11-beta dehydrogenase 1	NM_001044751; NM_008288; ENSMUST00000016338; ENSMUST00000159644; ENSMUST00000160929; ENSMUST00000161406; ENSMUST00000161737; ENSMUST00000162842; BC132364; BC138780; BC145415; NM_001044751.1; NM_008288.2; OTTMUST00000075988; OTTMUST00000075989; OTTMUST00000075990; OTTMUST00000075991; OTTMUST00000075992; OTTMUST00000079283; NONMMUT004444; uc007eef.1; uc007eeg.1; uc007eeh.1	RefSeq; ENSEMBL; GenBank; MGI/Jackson Lab; Havana transcript; NONCODE; UCSC Genes	Mus musculus hydroxysteroid 11-beta dehydrogenase 1 (Hsd11b1), transcript variant 2, mRNA.; Mus musculus hydroxysteroid 11-beta dehydrogenase 1 (Hsd11b1), transcript variant 1, mRNA.; hydroxysteroid 11-beta dehydrogenase 1 [gene_biotype:protein_coding transcript_biotype:protein_coding]; hydroxysteroid 11-beta dehydrogenase 1 [gene_biotype:protein_coding transcript_biotype:processed_transcript]; M…	chr1	coding
TC0200000046.mm.1	5.6641	5.07726	1.50196	0.026485				uc029tvo.1	UCSC Genes	Mus musculus non-coding RNA, oocyte_clustered_small_RNA10430, complete sequence.	chr2	ncrna
TC0200000228.mm.1	6.68124	7.51846	-1.7866	0.00138071	19212	Pter	phosphotriesterase related; phosphotriesterase related	NM_008961; ENSMUST00000028063; ENSMUST00000114796; ENSMUST00000134794; ENSMUST00000150283; ENSMUST00000154269; BC003793; NM_008961.2; OTTMUST00000026042; OTTMUST00000026043; OTTMUST00000026044; OTTMUST00000026045; OTTMUST00000026046; NONMMUT035784; uc008ijt.1; uc008iju.1; uc012bqx.1	RefSeq; ENSEMBL; GenBank; MGI/Jackson Lab; Havana transcript; NONCODE; UCSC Genes	Mus musculus phosphotriesterase related (Pter), transcript variant 2, mRNA.; phosphotriesterase related [gene_biotype:protein_coding transcript_biotype:protein_coding]; phosphotriesterase related [gene_biotype:protein_coding transcript_biotype:processed_transcript]; Mus musculus phosphotriesterase related, mRNA (cDNA clone MGC:6034 IMAGE:3601675), complete cds.; phosphotriesterase related ; phosp…	chr2	coding
TC0200000420.mm.1	6.95777	6.35125	1.52258	0.0344069	30839	Fbxw5	F-box and WD-40 domain protein 5; F-box and WD-40 domain protein 5	NM_013908; ENSMUST00000015239; ENSMUST00000124258; ENSMUST00000124375; ENSMUST00000126601; ENSMUST00000129104; ENSMUST00000135456; ENSMUST00000135511; ENSMUST00000142004; ENSMUST00000148845; BC010776; NM_013908.4; OTTMUST00000028918; OTTMUST00000028919; OTTMUST00000028920; OTTMUST00000028921; OTTMUST00000028922; OTTMUST00000028923; OTTMUST00000028924; OTTMUST00000028925; OTTMUST00000028926; uc008…	RefSeq; ENSEMBL; GenBank; MGI/Jackson Lab; Havana transcript; UCSC Genes	Mus musculus F-box and WD-40 domain protein 5 (Fbxw5), mRNA.; F-box and WD-40 domain protein 5 [gene_biotype:protein_coding transcript_biotype:protein_coding]; F-box and WD-40 domain protein 5 [gene_biotype:protein_coding transcript_biotype:processed_transcript]; Mus musculus F-box and WD-40 domain protein 5, mRNA (cDNA clone MGC:18679 IMAGE:4211592), complete cds.; F-box and WD-40 domain protein…	chr2	coding
TC0200000489.mm.1	7.95357	7.28505	1.58944	0.0400829		Gm22824	predicted gene, 22824 [Source:MGI Symbol;Acc:MGI:5452601]	ENSMUST00000104867	ENSEMBL	predicted gene, 22824 [gene_biotype:miRNA transcript_biotype:miRNA]	chr2	ncrna
TC0200000620.mm.1	9.02474	8.43094	1.50922	0.0237466	14828	Hspa5	heat shock protein 5; heat shock protein 5 ; heat shock 70kD protein 5 (glucose-regulated protein)	NM_001163434; NM_022310; ENSMUST00000028222; ENSMUST00000100171; ENSMUST00000129333; ENSMUST00000137145; ENSMUST00000137505; ENSMUST00000145466; ENSMUST00000148308; ENSMUST00000155595; BC050927; NM_001163434.1; NM_022310.3; OTTMUST00000028494; OTTMUST00000028495; OTTMUST00000028496; OTTMUST00000028497; OTTMUST00000028498; OTTMUST00000028499; OTTMUST00000028500; OTTMUST00000028501; NONMMUT036826; …	RefSeq; ENSEMBL; GenBank; MGI/Jackson Lab; Havana transcript; NONCODE; UCSC Genes	Mus musculus heat shock protein 5 (Hspa5), transcript variant 1, mRNA.; Mus musculus heat shock protein 5 (Hspa5), transcript variant 2, mRNA.; heat shock protein 5 [gene_biotype:protein_coding transcript_biotype:protein_coding]; heat shock protein 5 [gene_biotype:protein_coding transcript_biotype:retained_intron]; heat shock protein 5 [gene_biotype:protein_coding transcript_biotype:nonsense_medi…	chr2	coding
TC0200000684.mm.1	9.12843	9.91309	-1.72268	0.0301353		Gm22306	predicted gene, 22306 [Source:MGI Symbol;Acc:MGI:5452083]	ENSMUST00000082692	ENSEMBL	predicted gene, 22306 [gene_biotype:snRNA transcript_biotype:snRNA]	chr2	ncrna
TC0200000720.mm.1	10.0605	10.8141	-1.68603	0.0490295		Gm26127	predicted gene, 26127 [Source:MGI Symbol;Acc:MGI:5455904]	ENSMUST00000083193	ENSEMBL	predicted gene, 26127 [gene_biotype:snRNA transcript_biotype:snRNA]	chr2	ncrna
TC0200000796.mm.1	3.0094	3.75806	-1.68022	0.013722				NONMMUT037201	NONCODE	Non-coding transcript identified by NONCODE: Sense No Exonic	chr2	ncrna
TC0200000868.mm.1	6.68855	6.02203	1.58725	0.0356215	14571	Gpd2	glycerol phosphate dehydrogenase 2, mitochondrial; glycerol phosphate dehydrogenase 2, mitochondrial	NM_001145820; NM_010274; ENSMUST00000028167; ENSMUST00000112618; ENSMUST00000124689; ENSMUST00000141536; ENSMUST00000148991; ENSMUST00000154612; ENSMUST00000169687; BC021359; NM_001145820.1; NM_010274.3; OTTMUST00000029883; OTTMUST00000030012; OTTMUST00000030013; OTTMUST00000031299; OTTMUST00000031300; NONMMUT037370; NONMMUT037371; NONMMUT037372; NONMMUT037373; uc008jsc.2; uc008jsd.1; uc008jse.2	RefSeq; ENSEMBL; GenBank; MGI/Jackson Lab; Havana transcript; NONCODE; UCSC Genes	Mus musculus glycerol phosphate dehydrogenase 2, mitochondrial (Gpd2), transcript variant 1, mRNA.; Mus musculus glycerol phosphate dehydrogenase 2, mitochondrial (Gpd2), transcript variant 2, mRNA.; glycerol phosphate dehydrogenase 2, mitochondrial [gene_biotype:protein_coding transcript_biotype:protein_coding]; glycerol phosphate dehydrogenase 2, mitochondrial [gene_biotype:protein_coding trans…	chr2	coding
TC0200000926.mm.1	4.36536	2.67312	3.23159	0.00453607		Gm25966	predicted gene, 25966 [Source:MGI Symbol;Acc:MGI:5455743]	ENSMUST00000157169	ENSEMBL	predicted gene, 25966 [gene_biotype:rRNA transcript_biotype:rRNA]	chr2	ncrna
TC0200001226.mm.1	7.645	6.929	1.64262	0.00787648	58207	Slc43a3	solute carrier family 43, member 3; solute carrier family 43, member 3	NM_021398; ENSMUST00000090726; ENSMUST00000130278; ENSMUST00000138719; ENSMUST00000141650; ENSMUST00000155506; ENSMUST00000155537; BC089603; NM_021398.3; OTTMUST00000032390; OTTMUST00000032391; OTTMUST00000062993; OTTMUST00000062994; OTTMUST00000062995; OTTMUST00000062996; NONMMUT038296; uc008kjn.2; uc008kjo.1	RefSeq; ENSEMBL; GenBank; MGI/Jackson Lab; Havana transcript; NONCODE; UCSC Genes	Mus musculus solute carrier family 43, member 3 (Slc43a3), mRNA.; solute carrier family 43, member 3 [gene_biotype:protein_coding transcript_biotype:protein_coding]; solute carrier family 43, member 3 [gene_biotype:protein_coding transcript_biotype:processed_transcript]; solute carrier family 43, member 3 [gene_biotype:protein_coding transcript_biotype:retained_intron]; Mus musculus solute carrie…	chr2	coding
TC0200001265.mm.1	2.79514	3.59269	-1.73815	0.0273836				NONMMUT038328	NONCODE	Non-coding transcript identified by NONCODE: Sense No Exonic	chr2	ncrna
TC0200001356.mm.1	7.64421	7.03393	1.52655	0.0120035	56428	Mtch2	mitochondrial carrier homolog 2 (C. elegans); mitochondrial carrier homolog 2 (C. elegans)	NM_019758; ENSMUST00000057216; ENSMUST00000111467; ENSMUST00000111468; ENSMUST00000135026; ENSMUST00000136872; ENSMUST00000142350; ENSMUST00000143773; ENSMUST00000144696; ENSMUST00000146392; ENSMUST00000148936; ENSMUST00000150232; BC038899; BC038916; NM_019758.2; OTTMUST00000033726; OTTMUST00000033727; OTTMUST00000033728; OTTMUST00000033729; OTTMUST00000033730; OTTMUST00000033731; OTTMUST00000033…	RefSeq; ENSEMBL; GenBank; MGI/Jackson Lab; Havana transcript; NONCODE; UCSC Genes	Mus musculus mitochondrial carrier homolog 2 (C. elegans) (Mtch2), mRNA.; mitochondrial carrier homolog 2 (C. elegans) [gene_biotype:protein_coding transcript_biotype:processed_transcript]; mitochondrial carrier homolog 2 (C. elegans) [gene_biotype:protein_coding transcript_biotype:protein_coding]; mitochondrial carrier homolog 2 (C. elegans) [gene_biotype:protein_coding transcript_biotype:nonsen…	chr2	coding
TC0200001428.mm.1	1.43525	2.54146	-2.1528	0.0467746				uc008lax.1	UCSC Genes	Mus musculus piRNA piR-114958, complete sequence.	chr2	ncrna
TC0200001502.mm.1	8.40754	9.47126	-2.09032	0.00840345		Gm10801	predicted gene 10801 [Source:MGI Symbol;Acc:MGI:3641656]	ENSMUST00000099684; NONMMUT038757	ENSEMBL; NONCODE	predicted gene 10801 [gene_biotype:protein_coding transcript_biotype:protein_coding]; Non-coding transcript identified by NONCODE: Linc	chr2	ncrna
TC0200001503.mm.1	8.50948	9.67389	-2.24141	0.0176671				NONMMUT038759; NONMMUT038760	NONCODE	Non-coding transcript identified by NONCODE: Linc	chr2	ncrna
TC0200001617.mm.1	8.26972	7.34902	1.89303	0.000763139	623031	Gm13910	predicted gene 13910	ENSMUST00000178194; ENSMUST00000121752; OTTMUST00000035751	ENSEMBL; Havana transcript	predicted gene 13910 ; predicted gene 13910 [gene_biotype:processed_pseudogene transcript_biotype:processed_pseudogene]; hydroxyacyl-Coenzyme A dehydrogenase/3-ketoacyl-Coenzyme A thiolase/enoyl-Coenzyme A hydratase (trifunctional protein) beta subunit (Hadhb) pseudogene[gene_biotype:processed_pseudogene transcript_biotype:processed_pseudogene]	chr2	ncrna
TC0200001723.mm.1	10.478	11.1396	-1.58185	0.0345079		Gm25189	predicted gene, 25189 [Source:MGI Symbol;Acc:MGI:5454966]	ENSMUST00000083911	ENSEMBL	predicted gene, 25189 [gene_biotype:snRNA transcript_biotype:snRNA]	chr2	ncrna
TC0200001773.mm.1	7.82318	7.15336	1.59087	0.00231691	56398	Chp1	calcineurin-like EF hand protein 1; calcineurin-like EF hand protein 1	NM_019769; ENSMUST00000014221; ENSMUST00000119172; ENSMUST00000132448; ENSMUST00000137585; ENSMUST00000154406; BC054733; BC064784; NM_019769.3; OTTMUST00000037896; OTTMUST00000037897; OTTMUST00000037898; OTTMUST00000037899; OTTMUST00000037900; NONMMUT039361; uc008ltv.1; uc008ltw.1	RefSeq; ENSEMBL; GenBank; MGI/Jackson Lab; Havana transcript; NONCODE; UCSC Genes	Mus musculus calcineurin-like EF hand protein 1 (Chp1), mRNA.; calcineurin-like EF hand protein 1 [gene_biotype:protein_coding transcript_biotype:protein_coding]; calcineurin-like EF hand protein 1 [gene_biotype:protein_coding transcript_biotype:retained_intron]; Mus musculus RIKEN cDNA 1500003O03 gene, mRNA (cDNA clone MGC:64742 IMAGE:5720240), complete cds.; Mus musculus RIKEN cDNA 1500003O03 g…	chr2	coding
TC0200001813.mm.1	5.03759	3.9753	2.08823	0.00669201				NONMMUT039492	NONCODE	Non-coding transcript identified by NONCODE: Sense No Exonic	chr2	ncrna
TC0200001837.mm.1	4.5981	3.95105	1.56596	0.0360105				NONMMUT039531	NONCODE	Non-coding transcript identified by NONCODE: Sense No Exonic	chr2	ncrna
TC0200002057.mm.1	9.7423	9.14466	1.51323	0.0335465		Gm14036	predicted gene 14036 [Source:MGI Symbol;Acc:MGI:3649581]	ENSMUST00000118248; NONMMUT040058; OTTMUST00000036666	ENSEMBL; NONCODE; Havana transcript	predicted gene 14036 [gene_biotype:processed_pseudogene transcript_biotype:processed_pseudogene]; Non-coding transcript identified by NONCODE: Sense No Exonic; ribosomal protein L29 (Rpl29) pseudogene[gene_biotype:processed_pseudogene transcript_biotype:processed_pseudogene]	chr2	ncrna
TC0200002150.mm.1	6.49539	5.79348	1.62665	0.0425813	27054	Sec23b	SEC23 homolog B, COPII coat complex component; SEC23B (S. cerevisiae)	NM_001252543; NM_001252544; NM_001252545; NM_001281816; NM_019787; ENSMUST00000028916; ENSMUST00000128210; ENSMUST00000143573; ENSMUST00000143921; ENSMUST00000146487; ENSMUST00000149697; ENSMUST00000155258; ENSMUST00000155876; BC005464; BC011160; NM_001252543.1; NM_001252544.1; NM_001252545.1; NM_019787.4; NR_045534.1; OTTMUST00000008693; OTTMUST00000008694; OTTMUST00000008695; OTTMUST00000008696…	RefSeq; ENSEMBL; GenBank; MGI/Jackson Lab; Havana transcript; NONCODE; UCSC Genes	Mus musculus SEC23 homolog B, COPII coat complex component (Sec23b), transcript variant 2, mRNA.; Mus musculus SEC23 homolog B, COPII coat complex component (Sec23b), transcript variant 3, mRNA.; Mus musculus SEC23 homolog B, COPII coat complex component (Sec23b), transcript variant 4, mRNA.; Mus musculus SEC23 homolog B, COPII coat complex component (Sec23b), transcript variant 5, mRNA.; Mus mus…	chr2	coding
TC0200002294.mm.1	5.0882	4.45303	1.55312	0.024769				NONMMUT040539	NONCODE	Non-coding transcript identified by NONCODE: Linc	chr2	ncrna
TC0200002366.mm.1	6.90839	6.12224	1.72446	0.00352989	68728	Trp53inp2	transformation related protein 53 inducible nuclear protein 2; transformation related protein 53 inducible nuclear protein 2	NM_178111; ENSMUST00000043237; ENSMUST00000134218; ENSMUST00000151466; ENSMUST00000173406; ENSMUST00000174685; BC036958; BC043086; NM_178111.3; OTTMUST00000038339; OTTMUST00000038340; OTTMUST00000038341; OTTMUST00000097788; OTTMUST00000097789; NONMMUT040664; NONMMUT040665; NONMMUT040666; uc008nkk.1; uc008nkl.1	RefSeq; ENSEMBL; GenBank; MGI/Jackson Lab; Havana transcript; NONCODE; UCSC Genes	Mus musculus transformation related protein 53 inducible nuclear protein 2 (Trp53inp2), mRNA.; transformation related protein 53 inducible nuclear protein 2 [gene_biotype:protein_coding transcript_biotype:protein_coding]; transformation related protein 53 inducible nuclear protein 2 [gene_biotype:protein_coding transcript_biotype:retained_intron]; Mus musculus transformation related protein 53 in…	chr2	coding
TC0200002476.mm.1	6.61077	5.98017	1.54821	0.0439451	27219	Sgk2	serum/glucocorticoid regulated kinase 2; serum/glucocorticoid regulated kinase 2	NM_013731; ENSMUST00000018012; ENSMUST00000117123; ENSMUST00000139053; BC026549; NM_013731.2; OTTMUST00000002245; OTTMUST00000038409; OTTMUST00000078245; uc008nsf.1; uc008nsg.2; uc008nsh.1	RefSeq; ENSEMBL; GenBank; MGI/Jackson Lab; Havana transcript; UCSC Genes	Mus musculus serum/glucocorticoid regulated kinase 2 (Sgk2), transcript variant 1, mRNA.; serum/glucocorticoid regulated kinase 2 [gene_biotype:protein_coding transcript_biotype:protein_coding]; serum/glucocorticoid regulated kinase 2 [gene_biotype:protein_coding transcript_biotype:retained_intron]; Mus musculus serum/glucocorticoid regulated kinase 2, mRNA (cDNA clone MGC:35987 IMAGE:4973908), c…	chr2	coding
TC0200002562.mm.1	2.69258	3.46606	-1.70939	0.00366669		Gm22687	predicted gene, 22687 [Source:MGI Symbol;Acc:MGI:5452464]	ENSMUST00000158301	ENSEMBL	predicted gene, 22687 [gene_biotype:rRNA transcript_biotype:rRNA]	chr2	ncrna
TC0200002669.mm.1	7.64262	6.96208	1.60274	0.00599234	66404	Rtfdc1	replication termination factor 2 domain containing 1; replication termination factor 2 domain containing 1	NM_025542; ENSMUST00000029005; ENSMUST00000109132; ENSMUST00000140048; BC004803; BC049072; BC096692; NM_025542.2; OTTMUST00000038645; OTTMUST00000038646; OTTMUST00000088928; uc008ocv.1; uc008ocw.1	RefSeq; ENSEMBL; GenBank; MGI/Jackson Lab; Havana transcript; UCSC Genes	Mus musculus replication termination factor 2 domain containing 1 (Rtfdc1), mRNA.; replication termination factor 2 domain containing 1 [gene_biotype:protein_coding transcript_biotype:protein_coding]; replication termination factor 2 domain containing 1 [gene_biotype:protein_coding transcript_biotype:retained_intron]; replication termination factor 2 domain containing 1 [gene_biotype:protein_codi…	chr2	coding
TC0200002749.mm.1	7.2514	7.86032	-1.52511	0.000718654	433520	Gm14403	predicted gene 14403; predicted gene 14403	NR_036450; BC098094; NR_036450.1; ENSMUST00000108940; ENSMUST00000108947; ENSMUST00000142549; NONMMUT041734; OTTMUST00000040076; OTTMUST00000040077; uc008ohb.1	RefSeq; GenBank; MGI/Jackson Lab; ENSEMBL; NONCODE; Havana transcript; UCSC Genes	Mus musculus predicted gene 14403 (Gm14403), long non-coding RNA.; Mus musculus predicted gene, OTTMUSG00000016571, mRNA (cDNA clone MGC:106630 IMAGE:30362243), complete cds.; predicted gene 14403 ; predicted gene 14403 [gene_biotype:protein_coding transcript_biotype:protein_coding]; predicted gene 14403 [gene_biotype:protein_coding transcript_biotype:processed_transcript]; Non-coding transcript …	chr2	ncrna
TC0200002871.mm.1	3.40913	2.65226	1.68981	0.0110689				uc029tvj.1	UCSC Genes	Mus musculus non-coding RNA, oocyte_clustered_small_RNA10459, complete sequence.	chr2	ncrna
TC0200003055.mm.1	3.68326	3.08157	1.51749	0.0258348				NONMMUT035974; NONMMUT035975	NONCODE	Non-coding transcript identified by NONCODE: Sense No Exonic	chr2	ncrna
TC0200003195.mm.1	8.65207	7.7265	1.89944	0.00515849	67512	Agpat2	1-acylglycerol-3-phosphate O-acyltransferase 2 (lysophosphatidic acid acyltransferase, beta); 1-acylglycerol-3-phosphate O-acyltransferase 2 (lysophosphatidic acid acyltransferase, beta) ; 1-acylglycerol-3-phosphate O-acyltransferase 2 (lysophosphatidic acid acyltransferase, beta) (Agpat2), mRNA.	NM_026212; ENSMUST00000028286; ENSMUST00000131940; ENSMUST00000140386; ENSMUST00000140508; ENSMUST00000154753; BC125530; BC137840; NM_026212.1; OTTMUST00000027050; OTTMUST00000027051; OTTMUST00000027052; OTTMUST00000027053; OTTMUST00000027054; uc008ivt.1; uc008ivu.1; uc008ivv.1; uc029twe.1	RefSeq; ENSEMBL; GenBank; MGI/Jackson Lab; Havana transcript; UCSC Genes	Mus musculus 1-acylglycerol-3-phosphate O-acyltransferase 2 (lysophosphatidic acid acyltransferase, beta) (Agpat2), mRNA.; 1-acylglycerol-3-phosphate O-acyltransferase 2 (lysophosphatidic acid acyltransferase, beta) [gene_biotype:protein_coding transcript_biotype:protein_coding]; 1-acylglycerol-3-phosphate O-acyltransferase 2 (lysophosphatidic acid acyltransferase, beta) [gene_biotype:protein_cod…	chr2	coding
TC0200003219.mm.1	3.19881	4.20148	-2.0037	0.0224292		Gm25541	predicted gene, 25541 [Source:MGI Symbol;Acc:MGI:5455318]	ENSMUST00000116888	ENSEMBL	predicted gene, 25541 [gene_biotype:snRNA transcript_biotype:snRNA]	chr2	ncrna
TC0200003220.mm.1	3.3058	4.34711	-2.05809	0.0152793				NONMMUT036431	NONCODE	Non-coding transcript identified by NONCODE: Linc	chr2	ncrna
TC0200003271.mm.1	7.37008	5.85721	2.85378	0.00285356	12908	Crat	carnitine acetyltransferase; carnitine acetyltransferase	NM_007760; ENSMUST00000028207; ENSMUST00000102854; ENSMUST00000102855; ENSMUST00000128593; ENSMUST00000129494; ENSMUST00000132981; ENSMUST00000134120; ENSMUST00000142096; ENSMUST00000146603; ENSMUST00000146822; ENSMUST00000154595; ENSMUST00000155790; ENSMUST00000156702; BC006668; NM_007760.3; OTTMUST00000040750; OTTMUST00000040751; OTTMUST00000040752; OTTMUST00000040753; OTTMUST00000040754; OTTMU…	RefSeq; ENSEMBL; GenBank; MGI/Jackson Lab; Havana transcript; UCSC Genes; NONCODE	Mus musculus carnitine acetyltransferase (Crat), mRNA.; carnitine acetyltransferase [gene_biotype:protein_coding transcript_biotype:protein_coding]; carnitine acetyltransferase [gene_biotype:protein_coding transcript_biotype:processed_transcript]; carnitine acetyltransferase [gene_biotype:protein_coding transcript_biotype:nonsense_mediated_decay]; Mus musculus carnitine acetyltransferase, mRNA (c…	chr2	coding
TC0200003307.mm.1	7.77873	7.12971	1.56811	0.000276656	14287; 102465885	Fpgs; Mir8093	folylpolyglutamyl synthetase; microRNA 8093; folylpolyglutamyl synthetase	NM_010236; NR_106168; ENSMUST00000028148; ENSMUST00000123171; ENSMUST00000127812; ENSMUST00000130164; ENSMUST00000132327; ENSMUST00000142186; ENSMUST00000143743; ENSMUST00000146498; ENSMUST00000149491; ENSMUST00000156792; BC005484; NM_010236.2; OTTMUST00000029793; OTTMUST00000029794; OTTMUST00000029795; OTTMUST00000029796; OTTMUST00000029797; OTTMUST00000029798; OTTMUST00000029799; OTTMUST0000002…	RefSeq; ENSEMBL; GenBank; MGI/Jackson Lab; Havana transcript; NONCODE; UCSC Genes	Mus musculus folylpolyglutamyl synthetase (Fpgs), mRNA.; Mus musculus microRNA 8093 (Mir8093), microRNA.; folylpolyglutamyl synthetase [gene_biotype:protein_coding transcript_biotype:protein_coding]; folylpolyglutamyl synthetase [gene_biotype:protein_coding transcript_biotype:retained_intron]; folylpolyglutamyl synthetase [gene_biotype:protein_coding transcript_biotype:processed_transcript]; foly…	chr2	coding
TC0200003529.mm.1	4.53244	5.29987	-1.70224	0.0247031	17996	Neb	nebulin; nebulin	NM_010889; ENSMUST00000028320; ENSMUST00000036934; ENSMUST00000075301; ENSMUST00000127339; ENSMUST00000131236; ENSMUST00000135200; ENSMUST00000136769; ENSMUST00000137410; ENSMUST00000139672; ENSMUST00000148356; ENSMUST00000152851; NM_010889.1; OTTMUST00000029838; OTTMUST00000029840; OTTMUST00000029891; OTTMUST00000030018; OTTMUST00000030019; OTTMUST00000030020; OTTMUST00000030022; OTTMUST00000030…	RefSeq; ENSEMBL; MGI/Jackson Lab; Havana transcript; NONCODE; UCSC Genes	Mus musculus nebulin (Neb), mRNA.; nebulin [gene_biotype:protein_coding transcript_biotype:protein_coding]; nebulin [gene_biotype:protein_coding transcript_biotype:processed_transcript]; nebulin ; nebulin[gene_biotype:protein_coding transcript_biotype:protein_coding]; nebulin[gene_biotype:protein_coding transcript_biotype:processed_transcript]; Non-coding transcript identified by NONCODE: Exonic	chr2	coding
TC0200003548.mm.1	4.69428	7.2404	-5.84064	0.000570382	207933	Gm13502	predicted gene 13502	ENSMUST00000179423; ENSMUST00000121574; OTTMUST00000029593	ENSEMBL; Havana transcript	predicted gene 13502 ; predicted gene 13502 [gene_biotype:processed_pseudogene transcript_biotype:processed_pseudogene]; isopentenyl-diphosphate delta isomerase (Idi1) pseudogene[gene_biotype:processed_pseudogene transcript_biotype:processed_pseudogene]	chr2	ncrna
TC0200003630.mm.1	4.71899	5.33118	-1.52858	0.0394221	71586	Ifih1	interferon induced with helicase C domain 1; interferon induced with helicase C domain 1	NM_001164477; NM_027835; ENSMUST00000028259; ENSMUST00000112459; ENSMUST00000175964; ENSMUST00000176388; ENSMUST00000176431; BC080200; NM_001164477.1; NM_027835.3; OTTMUST00000030862; OTTMUST00000099461; OTTMUST00000099462; OTTMUST00000099463; OTTMUST00000099464; NONMMUT037570; uc008jvm.2; uc008jvn.2; uc008jvo.2; uc012bvy.1	RefSeq; ENSEMBL; GenBank; MGI/Jackson Lab; Havana transcript; NONCODE; UCSC Genes	Mus musculus interferon induced with helicase C domain 1 (Ifih1), transcript variant 2, mRNA.; Mus musculus interferon induced with helicase C domain 1 (Ifih1), transcript variant 1, mRNA.; interferon induced with helicase C domain 1 [gene_biotype:protein_coding transcript_biotype:protein_coding]; interferon induced with helicase C domain 1 [gene_biotype:protein_coding transcript_biotype:retained…	chr2	coding
TC0200003732.mm.1	4.26059	5.23393	-1.96338	0.00381444		Rapgef4os1; RP23-326E21.1	Rap guanine nucleotide exchange factor (GEF) 4, opposite strand 1 [Source:MGI Symbol;Acc:MGI:3649714]; novel transcript	ENSMUST00000126462; OTTMUST00000031741; NONMMUT037848; NONMMUT037851; NONMMUT037853	ENSEMBL; Havana transcript; NONCODE	Rap guanine nucleotide exchange factor (GEF) 4, opposite strand 1 [gene_biotype:antisense transcript_biotype:antisense]; novel transcript; Non-coding transcript identified by NONCODE: Antisense	chr2	ncrna
TC0200003733.mm.1	4.68642	5.35102	-1.58513	0.00126228				NONMMUT037854	NONCODE	Non-coding transcript identified by NONCODE: Antisense	chr2	ncrna
TC0200003740.mm.1	7.96335	7.31437	1.56805	0.00477579	383712	Eif1-ps3	eukaryotic translation initiation factor 1, pseudogene 3	OTTMUST00000031806; ENSMUST00000121450; XM_357202.5	Havana transcript; ENSEMBL; MGI/Jackson Lab	eukaryotic translation initiation factor 1, pseudogene 3[gene_biotype:processed_pseudogene transcript_biotype:processed_pseudogene]; eukaryotic translation initiation factor 1, pseudogene 3 [gene_biotype:processed_pseudogene transcript_biotype:processed_pseudogene]; predicted gene 13637	chr2	ncrna
TC0200003791.mm.1	6.72694	6.07205	1.5745	0.0454686	18024	Nfe2l2	nuclear factor, erythroid derived 2, like 2; nuclear factor, erythroid derived 2, like 2	NM_010902; ENSMUST00000102672; ENSMUST00000152371; BC026943; NM_010902.3; OTTMUST00000032007; OTTMUST00000032008; NONMMUT038028; uc008keq.1; uc008ker.1	RefSeq; ENSEMBL; GenBank; MGI/Jackson Lab; Havana transcript; NONCODE; UCSC Genes	Mus musculus nuclear factor, erythroid derived 2, like 2 (Nfe2l2), transcript variant 1, mRNA.; nuclear factor, erythroid derived 2, like 2 [gene_biotype:protein_coding transcript_biotype:protein_coding]; nuclear factor, erythroid derived 2, like 2 [gene_biotype:protein_coding transcript_biotype:processed_transcript]; Mus musculus nuclear factor, erythroid derived 2, like 2, mRNA (cDNA clone MGC:…	chr2	coding
TC0200004126.mm.1	6.65088	6.05449	1.51192	0.0269545	51897	Atg13	autophagy related 13; autophagy related 13	NM_145528; ENSMUST00000028678; ENSMUST00000076803; ENSMUST00000126000; ENSMUST00000136412; ENSMUST00000139548; ENSMUST00000153631; BC016669; BC023673; BC023712; BC033419; NM_145528.3; OTTMUST00000033751; OTTMUST00000033752; OTTMUST00000033753; OTTMUST00000033754; OTTMUST00000033755; OTTMUST00000033756; NONMMUT038489; NONMMUT038490; uc008kwn.2; uc029tzs.1	RefSeq; ENSEMBL; GenBank; MGI/Jackson Lab; Havana transcript; NONCODE; UCSC Genes	Mus musculus autophagy related 13 (Atg13), mRNA.; autophagy related 13 [gene_biotype:protein_coding transcript_biotype:protein_coding]; autophagy related 13 [gene_biotype:protein_coding transcript_biotype:processed_transcript]; Mus musculus DNA segment, Chr 2, ERATO Doi 391, expressed, mRNA (cDNA clone MGC:6816 IMAGE:2648797), complete cds.; Mus musculus DNA segment, Chr 2, ERATO Doi 391, express…	chr2	coding
TC0200004227.mm.1	11.7479	11.0658	1.60446	0.00171348	12359	Cat	catalase; catalase	NM_009804; ENSMUST00000028610; ENSMUST00000111168; BC013447; NM_009804.2; OTTMUST00000035344; OTTMUST00000035345; uc008liw.2	RefSeq; ENSEMBL; GenBank; MGI/Jackson Lab; Havana transcript; UCSC Genes	Mus musculus catalase (Cat), mRNA.; catalase [gene_biotype:protein_coding transcript_biotype:protein_coding]; Mus musculus catalase, mRNA (cDNA clone MGC:18464 IMAGE:4241333), complete cds.; catalase ; catalase[gene_biotype:protein_coding transcript_biotype:protein_coding]	chr2	coding
TC0200004308.mm.1	7.91016	7.24074	1.59043	0.00889699	170442	Bbox1	butyrobetaine (gamma), 2-oxoglutarate dioxygenase 1 (gamma-butyrobetaine hydroxylase); butyrobetaine (gamma), 2-oxoglutarate dioxygenase 1 (gamma-butyrobetaine hydroxylase)	NM_130452; ENSMUST00000046233; ENSMUST00000133608; BC019406; NM_130452.1; OTTMUST00000035877; OTTMUST00000035878; uc008lmu.1	RefSeq; ENSEMBL; GenBank; MGI/Jackson Lab; Havana transcript; UCSC Genes	Mus musculus butyrobetaine (gamma), 2-oxoglutarate dioxygenase 1 (gamma-butyrobetaine hydroxylase) (Bbox1), mRNA.; butyrobetaine (gamma), 2-oxoglutarate dioxygenase 1 (gamma-butyrobetaine hydroxylase) [gene_biotype:protein_coding transcript_biotype:protein_coding]; Mus musculus butyrobetaine (gamma), 2-oxoglutarate dioxygenase 1 (gamma-butyrobetaine hydroxylase), mRNA (cDNA clone MGC:30364 IMAGE:…	chr2	coding
TC0200004450.mm.1	4.21024	5.59197	-2.60579	0.0020552		Gm13998	predicted gene 13998 [Source:MGI Symbol;Acc:MGI:3651215]	ENSMUST00000120952; OTTMUST00000036209	ENSEMBL; Havana transcript	predicted gene 13998 [gene_biotype:processed_pseudogene transcript_biotype:processed_pseudogene]; fatty acid binding protein 5 epidermal (Fabp5) pseudogene[gene_biotype:processed_pseudogene transcript_biotype:processed_pseudogene]	chr2	ncrna
TC0200004466.mm.1	6.39022	7.2644	-1.83296	0.0147671		n-R5s205	nuclear encoded rRNA 5S 205 [Source:MGI Symbol;Acc:MGI:4422070]	ENSMUST00000083149	ENSEMBL	nuclear encoded rRNA 5S 205 [gene_biotype:rRNA transcript_biotype:rRNA]	chr2	ncrna
TC0200004734.mm.1	7.78326	8.39076	-1.52362	0.00893198		Calr-ps	calreticulin, pseudogene [Source:MGI Symbol;Acc:MGI:3651104]	ENSMUST00000121776; OTTMUST00000037052	ENSEMBL; Havana transcript	calreticulin, pseudogene [gene_biotype:processed_pseudogene transcript_biotype:processed_pseudogene]; calreticulin, pseudogene[gene_biotype:processed_pseudogene transcript_biotype:processed_pseudogene]	chr2	ncrna
TC0200004800.mm.1	5.05619	5.71415	-1.57785	0.0330185		9030622O22Rik; RP23-207P16.1	RIKEN cDNA 9030622O22 gene [Source:MGI Symbol;Acc:MGI:1918820]; novel transcript	ENSMUST00000129082; ENSMUST00000132070; ENSMUST00000136555; OTTMUST00000037254; OTTMUST00000037255; OTTMUST00000037256; NONMMUT040350; NONMMUT040351; NONMMUT040352; NONMMUT040353; NONMMUT040354; NONMMUT040355; NONMMUT040356; NONMMUT040357; NONMMUT040358; NONMMUT040359; NONMMUT040361; NONMMUT040362; NONMMUT040363; NONMMUT040364	ENSEMBL; Havana transcript; NONCODE	RIKEN cDNA 9030622O22 gene [gene_biotype:lincRNA transcript_biotype:lincRNA]; novel transcript; Non-coding transcript identified by NONCODE: Linc	chr2	ncrna
TC0200004943.mm.1	9.05246	7.40903	3.12407	0.000191708	59038	Pxmp4	peroxisomal membrane protein 4; peroxisomal membrane protein 4	NM_021534; ENSMUST00000000896; ENSMUST00000109703; BC025796; NM_021534.3; OTTMUST00000037821; OTTMUST00000037822; NONMMUT040618; uc008njm.1	RefSeq; ENSEMBL; GenBank; MGI/Jackson Lab; Havana transcript; NONCODE; UCSC Genes	Mus musculus peroxisomal membrane protein 4 (Pxmp4), mRNA.; peroxisomal membrane protein 4 [gene_biotype:protein_coding transcript_biotype:protein_coding]; Mus musculus peroxisomal membrane protein 4, mRNA (cDNA clone MGC:35858 IMAGE:5100832), complete cds.; peroxisomal membrane protein 4 ; peroxisomal membrane protein 4[gene_biotype:protein_coding transcript_biotype:protein_coding]; Non-coding t…	chr2	coding
TC0200004944.mm.1	8.64224	7.34311	2.4608	0.00232883				NONMMUT040619	NONCODE	Non-coding transcript identified by NONCODE: Sense No Exonic	chr2	ncrna
TC0200004958.mm.1	6.30381	5.51332	1.72966	0.00213706	228812	Pigu	phosphatidylinositol glycan anchor biosynthesis, class U; phosphatidylinositol glycan anchor biosynthesis, class U	NM_001004721; ENSMUST00000077626; ENSMUST00000124419; ENSMUST00000125334; ENSMUST00000139854; ENSMUST00000165234; BC120680; BC120682; NM_001004721.1; OTTMUST00000038109; OTTMUST00000038336; OTTMUST00000038337; OTTMUST00000038338; NONMMUT040660; NONMMUT040661; NONMMUT040662; uc008nki.1; uc008nkj.1	RefSeq; ENSEMBL; GenBank; MGI/Jackson Lab; Havana transcript; NONCODE; UCSC Genes	Mus musculus phosphatidylinositol glycan anchor biosynthesis, class U (Pigu), mRNA.; phosphatidylinositol glycan anchor biosynthesis, class U [gene_biotype:protein_coding transcript_biotype:protein_coding]; phosphatidylinositol glycan anchor biosynthesis, class U [gene_biotype:protein_coding transcript_biotype:retained_intron]; phosphatidylinositol glycan anchor biosynthesis, class U [gene_biotyp…	chr2	coding
TC0200005081.mm.1	6.47803	5.70529	1.70852	0.0222656		Gm20267	PREDICTED: predicted gene, 20267 (Gm20267), mRNA.	XM_003084519.1	MGI/Jackson Lab	PREDICTED: predicted gene, 20267 (Gm20267), mRNA.	chr2	ncrna
TC0200005091.mm.1	6.77176	5.92438	1.79922	0.00138607	228859	Fitm2	fat storage-inducing transmembrane protein 2; fat storage-inducing transmembrane protein 2	NM_173397; ENSMUST00000109418; BC090994; BC138522; BC138532; NM_173397.4; OTTMUST00000002123; NONMMUT041003; uc008nsv.1; uc029uhz.1	RefSeq; ENSEMBL; GenBank; MGI/Jackson Lab; Havana transcript; NONCODE; UCSC Genes	Mus musculus fat storage-inducing transmembrane protein 2 (Fitm2), mRNA.; fat storage-inducing transmembrane protein 2 [gene_biotype:protein_coding transcript_biotype:protein_coding]; Mus musculus RIKEN cDNA D930001I22 gene, mRNA (cDNA clone MGC:107602 IMAGE:6750721), complete cds.; Mus musculus RIKEN cDNA D930001I22 gene, mRNA (cDNA clone MGC:170147 IMAGE:8861542), complete cds.; Mus musculus RI…	chr2	coding
TC0200005094.mm.1	10.4516	9.62971	1.76767	0.0036202	26943	Serinc3	serine incorporator 3; serine incorporator 3	NM_012032; ENSMUST00000017851; ENSMUST00000129854; BC011295; BC022901; BC029026; NM_012032.4; OTTMUST00000038529; OTTMUST00000038530; NONMMUT041014; uc008ntg.2	RefSeq; ENSEMBL; GenBank; MGI/Jackson Lab; Havana transcript; NONCODE; UCSC Genes	Mus musculus serine incorporator 3 (Serinc3), mRNA.; serine incorporator 3 [gene_biotype:protein_coding transcript_biotype:protein_coding]; serine incorporator 3 [gene_biotype:protein_coding transcript_biotype:processed_transcript]; Mus musculus serine incorporator 3, mRNA (cDNA clone MGC:18455 IMAGE:3487943), complete cds.; Mus musculus serine incorporator 3, mRNA (cDNA clone MGC:30210 IMAGE:506…	chr2	coding
TC0200005150.mm.1	5.91233	6.92007	-2.01077	0.0410159	114644	Slc13a3	solute carrier family 13 (sodium-dependent dicarboxylate transporter), member 3; solute carrier family 13 (sodium-dependent dicarboxylate transporter), member 3	NM_054055; ENSMUST00000029208; ENSMUST00000109279; ENSMUST00000143136; ENSMUST00000145513; ENSMUST00000147107; BC026803; NM_054055.2; OTTMUST00000002317; OTTMUST00000040179; OTTMUST00000040180; OTTMUST00000040181; OTTMUST00000040182; NONMMUT041132; NONMMUT041133; uc008nxs.1; uc008nxt.1; uc012cji.1	RefSeq; ENSEMBL; GenBank; MGI/Jackson Lab; Havana transcript; NONCODE; UCSC Genes	Mus musculus solute carrier family 13 (sodium-dependent dicarboxylate transporter), member 3 (Slc13a3), mRNA.; solute carrier family 13 (sodium-dependent dicarboxylate transporter), member 3 [gene_biotype:protein_coding transcript_biotype:protein_coding]; solute carrier family 13 (sodium-dependent dicarboxylate transporter), member 3 [gene_biotype:protein_coding transcript_biotype:retained_intron…	chr2	coding
TC0200005289.mm.1	5.12809	5.9574	-1.77683	0.00955269				NONMMUT041545; NONMMUT041546; NONMMUT041549; NONMMUT041555; NONMMUT041556; NONMMUT041557; NovelTID_00004164; NovelTID_00004165; NovelTID_00004166; NovelTID_00004167	NONCODE; Luo lincRNA	Non-coding transcript identified by NONCODE: Linc; Non-coding transcript identified by Luo, et al.	chr2	ncrna
TC0200005290.mm.1	4.75545	5.3423	-1.50196	0.00692424	58203	Zbp1	Z-DNA binding protein 1; Z-DNA binding protein 1	NM_001139519; NM_021394; ENSMUST00000029018; ENSMUST00000109116; ENSMUST00000146802; BC020033; NM_001139519.1; NM_021394.2; OTTMUST00000040401; OTTMUST00000040402; OTTMUST00000040403; uc008odo.3; uc008odp.2	RefSeq; ENSEMBL; GenBank; MGI/Jackson Lab; Havana transcript; UCSC Genes	Mus musculus Z-DNA binding protein 1 (Zbp1), transcript variant 2, mRNA.; Mus musculus Z-DNA binding protein 1 (Zbp1), transcript variant 1, mRNA.; Z-DNA binding protein 1 [gene_biotype:protein_coding transcript_biotype:protein_coding]; Z-DNA binding protein 1 [gene_biotype:protein_coding transcript_biotype:retained_intron]; Mus musculus Z-DNA binding protein 1, mRNA (cDNA clone MGC:28261 IMAGE:4…	chr2	coding
TC0300000011.mm.1	9.35837	9.99657	-1.55638	0.0270358		n-R5s194	nuclear encoded rRNA 5S 194 [Source:MGI Symbol;Acc:MGI:4422059]	ENSMUST00000104719	ENSEMBL	nuclear encoded rRNA 5S 194 [gene_biotype:rRNA transcript_biotype:rRNA]	chr3	ncrna
TC0300000012.mm.1	8.06523	7.4324	1.55061	0.0400267		Gm23937	predicted gene, 23937	ENSMUST00000104802	ENSEMBL	predicted gene, 23937	chr3	ncrna
TC0300000049.mm.1	8.65432	8.06161	1.50807	0.0454455		Gm15467	predicted gene 15467 [Source:MGI Symbol;Acc:MGI:3705388]	ENSMUST00000120582; NONMMUT042054; OTTMUST00000053476	ENSEMBL; NONCODE; Havana transcript	predicted gene 15467 [gene_biotype:processed_pseudogene transcript_biotype:processed_pseudogene]; Non-coding transcript identified by NONCODE: Antisense; ribosomal protein L29 (Rpl29) pseudogene[gene_biotype:processed_pseudogene transcript_biotype:processed_pseudogene]	chr3	ncrna
TC0300000060.mm.1	3.8449	4.64008	-1.73529	0.00148123	16592	Fabp5	fatty acid binding protein 5, epidermal; fatty acid binding protein 5, epidermal	NM_001272097; NM_001272098; NM_010634; ENSMUST00000029046; ENSMUST00000123744; BC002008; BC100543; NM_010634.2; OTTMUST00000074134; OTTMUST00000074135; uc008opg.1; NONMMUT042093	RefSeq; ENSEMBL; GenBank; MGI/Jackson Lab; Havana transcript; UCSC Genes; NONCODE	Mus musculus fatty acid binding protein 5, epidermal (Fabp5), transcript variant 2, mRNA.; Mus musculus fatty acid binding protein 5, epidermal (Fabp5), transcript variant 3, mRNA.; Mus musculus fatty acid binding protein 5, epidermal (Fabp5), transcript variant 1, mRNA.; fatty acid binding protein 5, epidermal [gene_biotype:protein_coding transcript_biotype:protein_coding]; fatty acid binding pr…	chr3	coding
TC0300000094.mm.1	3.63324	2.71174	1.89407	0.000637731		Gm5843	predicted gene 5843 [Source:MGI Symbol;Acc:MGI:3645250]	ENSMUST00000121631; OTTMUST00000065437	ENSEMBL; Havana transcript	predicted gene 5843 [gene_biotype:unprocessed_pseudogene transcript_biotype:unprocessed_pseudogene]; carbonic anhydrase 1 (Car1) pseudogene[gene_biotype:unprocessed_pseudogene transcript_biotype:unprocessed_pseudogene]	chr3	ncrna
TC0300000095.mm.1	10.6932	9.31175	2.60538	0.00219411	12350	Car3	carbonic anhydrase 3; carbonic anhydrase 3	NM_007606; ENSMUST00000029076; BC011129; NM_007606.3; NONMMUT042155; uc008oqr.1; uc008oqs.1	RefSeq; ENSEMBL; GenBank; MGI/Jackson Lab; NONCODE; UCSC Genes	Mus musculus carbonic anhydrase 3 (Car3), mRNA.; carbonic anhydrase 3 [gene_biotype:protein_coding transcript_biotype:protein_coding]; Mus musculus carbonic anhydrase 3, mRNA (cDNA clone MGC:18583 IMAGE:4195712), complete cds.; carbonic anhydrase 3 ; Non-coding transcript identified by NONCODE: Exonic	chr3	coding
TC0300000117.mm.1	8.32127	7.5885	1.66183	0.011703		Gm5844	predicted gene 5844 [Source:MGI Symbol;Acc:MGI:3645252]	ENSMUST00000119417; OTTMUST00000054179; uc008ork.1	ENSEMBL; Havana transcript; UCSC Genes	predicted gene 5844 [gene_biotype:processed_pseudogene transcript_biotype:processed_pseudogene]; heat shock protein 90kDa alpha (cytosolic), class A member 1 (Hsp90aa1) pseudogene[gene_biotype:processed_pseudogene transcript_biotype:processed_pseudogene]; Mus musculus cDNA, clone:Y2G0143K08, strand:minus, reference:ENSEMBL:Mouse-Transcript-ENST:ENSMUST00000049510, based on BLAT search.	chr3	ncrna
TC0300000130.mm.1	9.97542	10.639	-1.584	0.0273346		Gm23330	predicted gene, 23330 [Source:MGI Symbol;Acc:MGI:5453107]	ENSMUST00000082660	ENSEMBL	predicted gene, 23330 [gene_biotype:snRNA transcript_biotype:snRNA]	chr3	ncrna
TC0300000343.mm.1	10.2031	10.9364	-1.6624	0.0324914		Gm23511	predicted gene, 23511 [Source:MGI Symbol;Acc:MGI:5453288]	ENSMUST00000083084	ENSEMBL	predicted gene, 23511 [gene_biotype:snRNA transcript_biotype:snRNA]	chr3	ncrna
TC0300000445.mm.1	4.21832	3.61143	1.52298	0.043417				NONMMUT043192	NONCODE	Non-coding transcript identified by NONCODE: Sense No Exonic	chr3	ncrna
TC0300000484.mm.1	5.44471	4.54867	1.86096	0.0379389	84112	Sucnr1	succinate receptor 1; succinate receptor 1	NM_032400; ENSMUST00000029326; BC096665; NM_032400.2; uc008pja.2	RefSeq; ENSEMBL; GenBank; MGI/Jackson Lab; UCSC Genes	Mus musculus succinate receptor 1 (Sucnr1), mRNA.; succinate receptor 1 [gene_biotype:protein_coding transcript_biotype:protein_coding]; Mus musculus succinate receptor 1, mRNA (cDNA clone MGC:106957 IMAGE:1365839), complete cds.; succinate receptor 1	chr3	coding
TC0300000500.mm.1	6.11076	4.30533	3.49531	0.000484026	17380	Mme	membrane metallo endopeptidase; membrane metallo endopeptidase ; membrane metallo endopeptidase (Mme), mRNA.	NM_001289462; NM_001289463; NM_008604; ENSMUST00000029400; BC034092; NM_008604.3; uc008pjp.1; uc008pjq.1; uc008pjr.1; uc008pjs.1	RefSeq; ENSEMBL; GenBank; MGI/Jackson Lab; UCSC Genes	Mus musculus membrane metallo endopeptidase (Mme), transcript variant 1, mRNA.; Mus musculus membrane metallo endopeptidase (Mme), transcript variant 3, mRNA.; Mus musculus membrane metallo endopeptidase (Mme), transcript variant 2, mRNA.; membrane metallo endopeptidase [gene_biotype:protein_coding transcript_biotype:protein_coding]; Mus musculus membrane metallo endopeptidase, mRNA (cDNA clone M…	chr3	coding
TC0300000514.mm.1	4.9008	4.28316	1.53436	0.00733068		Gm20656	predicted gene 20656 [Source:MGI Symbol;Acc:MGI:5313103]	ENSMUST00000176925; NONMMUT043322; OTTMUST00000103526	ENSEMBL; NONCODE; Havana transcript	predicted gene 20656 [gene_biotype:unprocessed_pseudogene transcript_biotype:unprocessed_pseudogene]; Non-coding transcript identified by NONCODE: Linc; guanine monophosphate synthetase (Gmps) pseudogene[gene_biotype:unprocessed_pseudogene transcript_biotype:unprocessed_pseudogene]	chr3	ncrna
TC0300000661.mm.1	3.53365	2.94073	1.5083	0.0426554				NONMMUT043672	NONCODE	Non-coding transcript identified by NONCODE: Sense No Exonic	chr3	ncrna
TC0300000716.mm.1	6.20036	5.46492	1.6649	0.00855838	17261	Mef2d	myocyte enhancer factor 2D; myocyte enhancer factor 2D	NM_133665; ENSMUST00000001455; ENSMUST00000107558; ENSMUST00000107559; ENSMUST00000119251; ENSMUST00000139153; ENSMUST00000140927; ENSMUST00000152861; BC011070; NM_133665.3; OTTMUST00000067113; OTTMUST00000067114; OTTMUST00000067115; OTTMUST00000067116; OTTMUST00000067117; OTTMUST00000067118; OTTMUST00000067119; NONMMUT043775; NONMMUT043776; NONMMUT043779; NONMMUT043780; NONMMUT043781; uc008ptz.1…	RefSeq; ENSEMBL; GenBank; MGI/Jackson Lab; Havana transcript; NONCODE; UCSC Genes	Mus musculus myocyte enhancer factor 2D (Mef2d), transcript variant 2, mRNA.; myocyte enhancer factor 2D [gene_biotype:protein_coding transcript_biotype:protein_coding]; myocyte enhancer factor 2D [gene_biotype:protein_coding transcript_biotype:processed_transcript]; myocyte enhancer factor 2D [gene_biotype:protein_coding transcript_biotype:retained_intron]; Mus musculus myocyte enhancer factor 2…	chr3	coding
TC0300000757.mm.1	4.77458	6.08751	-2.48445	0.00439863	100038411	Gm15998	predicted gene 15998	XR_104847.1; ENSMUST00000135144; OTTMUST00000071485; NONMMUT043961; NONMMUT043962; NONMMUT043963; uc008pyr.1	MGI/Jackson Lab; ENSEMBL; Havana transcript; NONCODE; UCSC Genes	predicted gene 15998 ; predicted gene 15998 [gene_biotype:antisense transcript_biotype:antisense]; Novel transcript; Non-coding transcript identified by NONCODE: Antisense; Mus musculus adult male corpora quadrigemina cDNA, RIKEN full-length enriched library, clone:B230209I18 product:hypothetical protein, full insert sequence.	chr3	ncrna
TC0300000781.mm.1	2.8337	3.59172	-1.69117	0.0113309		Gm23723	predicted gene, 23723 [Source:MGI Symbol;Acc:MGI:5453500]	ENSMUST00000082996	ENSEMBL	predicted gene, 23723 [gene_biotype:snoRNA transcript_biotype:snoRNA]	chr3	ncrna
TC0300000936.mm.1	9.84153	10.5068	-1.58584	0.0258216		Gm24830	predicted gene, 24830 [Source:MGI Symbol;Acc:MGI:5454607]	ENSMUST00000102024	ENSEMBL	predicted gene, 24830 [gene_biotype:snRNA transcript_biotype:snRNA]	chr3	ncrna
TC0300000941.mm.1	8.63104	9.3277	-1.62074	0.0211557		Gm24136	predicted gene, 24136 [Source:MGI Symbol;Acc:MGI:5453913]	ENSMUST00000083374	ENSEMBL	predicted gene, 24136 [gene_biotype:snRNA transcript_biotype:snRNA]	chr3	ncrna
TC0300000942.mm.1	9.84153	10.5068	-1.58584	0.0258216		Gm26232	predicted gene, 26232 [Source:MGI Symbol;Acc:MGI:5456009]	ENSMUST00000083360	ENSEMBL	predicted gene, 26232 [gene_biotype:snRNA transcript_biotype:snRNA]	chr3	ncrna
TC0300000947.mm.1	10.0252	10.7649	-1.66986	0.0193611		Gm22614	predicted gene, 22614 [Source:MGI Symbol;Acc:MGI:5452391]	ENSMUST00000178300	ENSEMBL	predicted gene, 22614 [gene_biotype:snRNA transcript_biotype:snRNA]	chr3	ncrna
TC0300000949.mm.1	8.19893	7.28645	1.88228	0.0465122	56338	Txnip	thioredoxin interacting protein; thioredoxin interacting protein	NM_001009935; NM_023719; ENSMUST00000049093; ENSMUST00000074519; ENSMUST00000128221; ENSMUST00000144639; ENSMUST00000151832; BC011212; BC031850; NM_001009935.2; NM_023719.2; OTTMUST00000050413; OTTMUST00000050414; OTTMUST00000050415; OTTMUST00000050416; OTTMUST00000050417; NONMMUT044298; NONMMUT044299; NONMMUT044300; uc008qnc.2; uc008qnd.2	RefSeq; ENSEMBL; GenBank; MGI/Jackson Lab; Havana transcript; NONCODE; UCSC Genes	Mus musculus thioredoxin interacting protein (Txnip), transcript variant 1, mRNA.; Mus musculus thioredoxin interacting protein (Txnip), transcript variant 2, mRNA.; thioredoxin interacting protein [gene_biotype:protein_coding transcript_biotype:protein_coding]; thioredoxin interacting protein [gene_biotype:protein_coding transcript_biotype:retained_intron]; thioredoxin interacting protein [gene_…	chr3	coding
TC0300000979.mm.1	11.745	10.9838	1.69489	0.00079222	15360	Hmgcs2	3-hydroxy-3-methylglutaryl-Coenzyme A synthase 2; 3-hydroxy-3-methylglutaryl-Coenzyme A synthase 2	NM_008256; ENSMUST00000090746; ENSMUST00000120541; BC014714; BC024744; NM_008256.4; OTTMUST00000065217; OTTMUST00000065218; uc008qpr.2	RefSeq; ENSEMBL; GenBank; MGI/Jackson Lab; Havana transcript; UCSC Genes	Mus musculus 3-hydroxy-3-methylglutaryl-Coenzyme A synthase 2 (Hmgcs2), mRNA.; 3-hydroxy-3-methylglutaryl-Coenzyme A synthase 2 [gene_biotype:protein_coding transcript_biotype:protein_coding]; Mus musculus 3-hydroxy-3-methylglutaryl-Coenzyme A synthase 2, mRNA (cDNA clone MGC:25633 IMAGE:4216637), complete cds.; Mus musculus 3-hydroxy-3-methylglutaryl-Coenzyme A synthase 2, mRNA (cDNA clone MGC:2…	chr3	coding
TC0300000980.mm.1	7.92585	6.97671	1.93071	0.0100522				NONMMUT044365	NONCODE	Non-coding transcript identified by NONCODE: Sense No Exonic	chr3	ncrna
TC0300001076.mm.1	7.18198	6.0654	2.16833	0.0025293	20501	Slc16a1	solute carrier family 16 (monocarboxylic acid transporters), member 1; solute carrier family 16 (monocarboxylic acid transporters), member 1	NM_009196; ENSMUST00000046212; BC014777; NM_009196.3; OTTMUST00000053776; uc008qui.1	RefSeq; ENSEMBL; GenBank; MGI/Jackson Lab; Havana transcript; UCSC Genes	Mus musculus solute carrier family 16 (monocarboxylic acid transporters), member 1 (Slc16a1), mRNA.; solute carrier family 16 (monocarboxylic acid transporters), member 1 [gene_biotype:protein_coding transcript_biotype:protein_coding]; Mus musculus solute carrier family 16 (monocarboxylic acid transporters), member 1, mRNA (cDNA clone MGC:5796 IMAGE:3499773), complete cds.; solute carrier family …	chr3	coding
TC0300001077.mm.1	3.10214	2.34312	1.69234	0.00107735				NONMMUT044605	NONCODE	Non-coding transcript identified by NONCODE: Sense No Exonic	chr3	ncrna
TC0300001104.mm.1	7.23604	6.60636	1.54723	0.000889882	67171	Dram2	DNA-damage regulated autophagy modulator 2; DNA-damage regulated autophagy modulator 2 ; VDNA-damage regulated autophagy modulator 2	NM_001025582; NM_001286986; NM_001286987; NM_026013; ENSMUST00000029507; ENSMUST00000067630; ENSMUST00000117469; ENSMUST00000121034; ENSMUST00000129053; ENSMUST00000132923; ENSMUST00000134396; ENSMUST00000135740; ENSMUST00000144746; ENSMUST00000151465; BC024458; NM_001025582.1; NM_026013.2; OTTMUST00000073042; OTTMUST00000073043; OTTMUST00000073044; OTTMUST00000073045; OTTMUST00000073046; OTTMUST…	RefSeq; ENSEMBL; GenBank; MGI/Jackson Lab; Havana transcript; UCSC Genes; NONCODE	Mus musculus DNA-damage regulated autophagy modulator 2 (Dram2), transcript variant 1, mRNA.; Mus musculus DNA-damage regulated autophagy modulator 2 (Dram2), transcript variant 3, mRNA.; Mus musculus DNA-damage regulated autophagy modulator 2 (Dram2), transcript variant 4, mRNA.; Mus musculus DNA-damage regulated autophagy modulator 2 (Dram2), transcript variant 2, mRNA.; DNA-damage regulated au…	chr3	coding
TC0300001200.mm.1	4.65516	5.25533	-1.5159	0.000155115				KnowTID_00004848; NONMMUT044922	Luo lincRNA; NONCODE	Non-coding transcript identified by Luo, et al.; Non-coding transcript identified by NONCODE: Linc	chr3	ncrna
TC0300001217.mm.1	2.32997	2.98427	-1.57385	0.00926095				KnowTID_00004853; NONMMUT044963; NONMMUT044964	Luo lincRNA; NONCODE	Non-coding transcript identified by Luo, et al.; Non-coding transcript identified by NONCODE: Linc	chr3	ncrna
TC0300001322.mm.1	7.36841	6.43188	1.91391	0.019125	71760	Etnppl	ethanolamine phosphate phospholyase; ethanolamine phosphate phospholyase	NM_001163587; NM_027907; ENSMUST00000072271; ENSMUST00000163620; ENSMUST00000166187; ENSMUST00000170664; ENSMUST00000172432; BC043680; BC058592; NM_001163587.1; NM_027907.3; OTTMUST00000092165; OTTMUST00000092166; OTTMUST00000092167; OTTMUST00000092168; OTTMUST00000092169; NONMMUT045278; uc008rja.1; uc008rjb.2; uc012cxv.1	RefSeq; ENSEMBL; GenBank; MGI/Jackson Lab; Havana transcript; NONCODE; UCSC Genes	Mus musculus ethanolamine phosphate phospholyase (Etnppl), transcript variant 2, mRNA.; Mus musculus ethanolamine phosphate phospholyase (Etnppl), transcript variant 1, mRNA.; ethanolamine phosphate phospholyase [gene_biotype:protein_coding transcript_biotype:protein_coding]; ethanolamine phosphate phospholyase [gene_biotype:protein_coding transcript_biotype:retained_intron]; Mus musculus alanine…	chr3	coding
TC0300001482.mm.1	7.26136	5.83715	2.68367	0.011911	69219	Ddah1	dimethylarginine dimethylaminohydrolase 1; dimethylarginine dimethylaminohydrolase 1	NM_026993; ENSMUST00000029845; ENSMUST00000120310; ENSMUST00000127193; BC034505; NM_026993.3; OTTMUST00000073001; OTTMUST00000073002; OTTMUST00000073003; NONMMUT045657; NONMMUT045658; uc008rqr.2	RefSeq; ENSEMBL; GenBank; MGI/Jackson Lab; Havana transcript; NONCODE; UCSC Genes	Mus musculus dimethylarginine dimethylaminohydrolase 1 (Ddah1), mRNA.; dimethylarginine dimethylaminohydrolase 1 [gene_biotype:protein_coding transcript_biotype:protein_coding]; dimethylarginine dimethylaminohydrolase 1 [gene_biotype:protein_coding transcript_biotype:processed_transcript]; Mus musculus dimethylarginine dimethylaminohydrolase 1, mRNA (cDNA clone MGC:30267 IMAGE:5134831), complete …	chr3	coding
TC0300001667.mm.1	3.69087	2.67816	2.0177	0.000808527	12346	Car1	carbonic anhydrase 1; carbonic anhydrase 1	NM_001083957; NM_009799; ENSMUST00000094365; ENSMUST00000144327; ENSMUST00000181860; BC011223; BC110681; BC132432; BC132434; NM_001083957.1; NM_009799.4; OTTMUST00000065423; OTTMUST00000065424; OTTMUST00000112073; uc008oqp.1; uc008oqq.1	RefSeq; ENSEMBL; GenBank; MGI/Jackson Lab; Havana transcript; UCSC Genes	Mus musculus carbonic anhydrase 1 (Car1), transcript variant 2, mRNA.; Mus musculus carbonic anhydrase 1 (Car1), transcript variant 1, mRNA.; carbonic anhydrase 1 [gene_biotype:protein_coding transcript_biotype:protein_coding]; Mus musculus carbonic anhydrase 1, mRNA (cDNA clone MGC:18584 IMAGE:4208180), complete cds.; Mus musculus carbonic anhydrase 1, mRNA (cDNA clone MGC:118082 IMAGE:4984216),…	chr3	coding
TC0300001669.mm.1	5.7353	4.76117	1.96446	0.0195577				NONMMUT042154	NONCODE	Non-coding transcript identified by NONCODE: Linc	chr3	ncrna
TC0300001670.mm.1	7.73227	6.09047	3.12055	0.000795328		LOC100862241	PREDICTED: uncharacterized LOC100862241, transcript variant 1 (LOC100862241), miscRNA.; PREDICTED: uncharacterized LOC100862241, transcript variant 2 (LOC100862241), miscRNA.	XR_141490.1; XR_141491.1	MGI/Jackson Lab	PREDICTED: uncharacterized LOC100862241, transcript variant 1 (LOC100862241), miscRNA.; PREDICTED: uncharacterized LOC100862241, transcript variant 2 (LOC100862241), miscRNA.	chr3	ncrna
TC0300001690.mm.1	10.5485	11.2332	-1.60734	0.0316837		Gm23686	predicted gene, 23686 [Source:MGI Symbol;Acc:MGI:5453463]	ENSMUST00000083241	ENSEMBL	predicted gene, 23686 [gene_biotype:snRNA transcript_biotype:snRNA]	chr3	ncrna
TC0300001693.mm.1	2.03336	2.80322	-1.70511	0.000268903				NONMMUT042203; NovelTID_00004383	NONCODE; Luo lincRNA	Non-coding transcript identified by NONCODE: Linc; Non-coding transcript identified by Luo, et al.	chr3	ncrna
TC0300001719.mm.1	4.14785	3.55438	1.50887	0.0319485	635702	Naaladl2	PREDICTED: N-acetylated alpha-linked acidic dipeptidase-like 2, transcript variant 2 (Naaladl2), mRNA.	XM_975226.3; NONMMUT042263; NONMMUT042266; NONMMUT042267; NONMMUT042271; uc008ota.1	MGI/Jackson Lab; NONCODE; UCSC Genes	PREDICTED: N-acetylated alpha-linked acidic dipeptidase-like 2, transcript variant 2 (Naaladl2), mRNA.; Non-coding transcript identified by NONCODE: Linc; Mus musculus 10, 11 days embryo whole body cDNA, RIKEN full-length enriched library, clone:2810043G22 product:unclassifiable, full insert sequence.	chr3	coding
TC0300002105.mm.1	6.71389	7.40592	-1.61556	0.0242468		Gm26442	predicted gene, 26442 [Source:MGI Symbol;Acc:MGI:5456219]	ENSMUST00000082588	ENSEMBL	predicted gene, 26442 [gene_biotype:snRNA transcript_biotype:snRNA]	chr3	ncrna
TC0300002156.mm.1	6.68382	5.97314	1.63658	0.000631726	12038	Bche	butyrylcholinesterase; butyrylcholinesterase	NM_009738; ENSMUST00000029367; ENSMUST00000133690; ENSMUST00000138216; ENSMUST00000153917; BC099977; NM_009738.3; OTTMUST00000065820; OTTMUST00000065821; OTTMUST00000065822; OTTMUST00000065823; NONMMUT043488; NONMMUT043489; uc008pmv.1; uc008pmw.1; uc008pmx.1	RefSeq; ENSEMBL; GenBank; MGI/Jackson Lab; Havana transcript; NONCODE; UCSC Genes	Mus musculus butyrylcholinesterase (Bche), mRNA.; butyrylcholinesterase [gene_biotype:protein_coding transcript_biotype:protein_coding]; butyrylcholinesterase [gene_biotype:protein_coding transcript_biotype:retained_intron]; butyrylcholinesterase [gene_biotype:protein_coding transcript_biotype:processed_transcript]; Mus musculus butyrylcholinesterase, mRNA (cDNA clone MGC:107651 IMAGE:6751601), c…	chr3	coding
TC0300002199.mm.1	8.2012	7.35999	1.79156	0.00020707	66841	Etfdh	electron transferring flavoprotein, dehydrogenase; electron transferring flavoprotein, dehydrogenase	NM_025794; ENSMUST00000029386; ENSMUST00000120992; ENSMUST00000126809; ENSMUST00000135058; ENSMUST00000149511; ENSMUST00000153039; BC012522; BC057670; NM_025794.2; OTTMUST00000072852; OTTMUST00000072867; OTTMUST00000072868; OTTMUST00000072869; OTTMUST00000072870; OTTMUST00000072871; NONMMUT043558; NONMMUT043559; uc008pnq.2; uc008pnr.2; uc008pns.2; uc008pnt.2	RefSeq; ENSEMBL; GenBank; MGI/Jackson Lab; Havana transcript; NONCODE; UCSC Genes	Mus musculus electron transferring flavoprotein, dehydrogenase (Etfdh), mRNA.; electron transferring flavoprotein, dehydrogenase [gene_biotype:protein_coding transcript_biotype:protein_coding]; electron transferring flavoprotein, dehydrogenase [gene_biotype:protein_coding transcript_biotype:processed_transcript]; electron transferring flavoprotein, dehydrogenase [gene_biotype:protein_coding trans…	chr3	coding
TC0300002218.mm.1	11.2773	10.6505	1.54417	0.00989422	56720	Tdo2	tryptophan 2,3-dioxygenase; tryptophan 2,3-dioxygenase	NM_019911; ENSMUST00000029645; ENSMUST00000137974; ENSMUST00000151089; BC018390; NM_019911.2; OTTMUST00000055914; OTTMUST00000055915; OTTMUST00000055916; uc008poo.1	RefSeq; ENSEMBL; GenBank; MGI/Jackson Lab; Havana transcript; UCSC Genes	Mus musculus tryptophan 2,3-dioxygenase (Tdo2), mRNA.; tryptophan 2,3-dioxygenase [gene_biotype:protein_coding transcript_biotype:protein_coding]; tryptophan 2,3-dioxygenase [gene_biotype:protein_coding transcript_biotype:retained_intron]; tryptophan 2,3-dioxygenase [gene_biotype:protein_coding transcript_biotype:processed_transcript]; Mus musculus tryptophan 2,3-dioxygenase, mRNA (cDNA clone MGC…	chr3	coding
TC0300002334.mm.1	5.43341	6.86498	-2.6974	0.00172661	110196	Fdps	farnesyl diphosphate synthetase; farnesyl diphosphate synthetase	NM_001253751; NM_134469; ENSMUST00000081848; BC048497; BC087886; NM_001253751.1; NM_134469.4; uc008pxo.2; uc029unc.1	RefSeq; ENSEMBL; GenBank; MGI/Jackson Lab; UCSC Genes	Mus musculus farnesyl diphosphate synthetase (Fdps), transcript variant 1, mRNA.; Mus musculus farnesyl diphosphate synthetase (Fdps), transcript variant 2, mRNA.; farnesyl diphosphate synthetase [gene_biotype:protein_coding transcript_biotype:protein_coding]; Mus musculus farnesyl diphosphate synthetase, mRNA (cDNA clone MGC:58339 IMAGE:6531586), complete cds.; Mus musculus farnesyl diphosphate …	chr3	coding
TC0300002489.mm.1	3.75208	4.5711	-1.76421	0.0365701	229599	Ciart	circadian associated repressor of transcription	NM_001033302; ENSMUST00000036418; ENSMUST00000159739; ENSMUST00000159863; ENSMUST00000161866; ENSMUST00000161867; ENSMUST00000161994; BC132471; BC138510; OTTMUST00000075664; OTTMUST00000075670; OTTMUST00000075671; OTTMUST00000075672; OTTMUST00000075673; OTTMUST00000075674; NM_001033302.2; uc008qll.1; uc008qlm.1	RefSeq; ENSEMBL; GenBank; Havana transcript; MGI/Jackson Lab; UCSC Genes	Mus musculus circadian associated repressor of transcription (Ciart), mRNA.; circadian associated repressor of transcription [gene_biotype:protein_coding transcript_biotype:protein_coding]; Mus musculus gene model 129, (NCBI), mRNA (cDNA clone MGC:164102 IMAGE:40130748), complete cds.; Mus musculus gene model 129, (NCBI), mRNA (cDNA clone MGC:170135 IMAGE:8861530), complete cds.; circadian associ…	chr3	coding
TC0300002508.mm.1	9.81712	10.4962	-1.60115	0.0342538	19844	Rnu1b1	U1b1 small nuclear RNA	NR_004412.1; ENSMUST00000178250	MGI/Jackson Lab; ENSEMBL	U1b1 small nuclear RNA ; U1b1 small nuclear RNA [gene_biotype:snRNA transcript_biotype:snRNA]	chr3	ncrna
TC0300002517.mm.1	9.84153	10.5068	-1.58584	0.0258216	19847	Rnu1b6	U1b6 small nuclear RNA	NR_004413.2; ENSMUST00000083839	MGI/Jackson Lab; ENSEMBL	U1b6 small nuclear RNA ; U1b6 small nuclear RNA [gene_biotype:snRNA transcript_biotype:snRNA]	chr3	ncrna
TC0300002518.mm.1	10.0252	10.7649	-1.66986	0.0193611		Gm25890	predicted gene, 25890 [Source:MGI Symbol;Acc:MGI:5455667]	ENSMUST00000177643	ENSEMBL	predicted gene, 25890 [gene_biotype:snRNA transcript_biotype:snRNA]	chr3	ncrna
TC0300002520.mm.1	6.13919	4.52928	3.05233	0.00858842	100038464	Gm15441	predicted gene 15441; predicted gene 15441	NR_040409; NR_040409.1; ENSMUST00000098839; ENSMUST00000107095; OTTMUST00000051889; OTTMUST00000051890; NONMMUT044295; NONMMUT044296; NONMMUT044297; uc008qnb.1	RefSeq; MGI/Jackson Lab; ENSEMBL; Havana transcript; NONCODE; UCSC Genes	Mus musculus predicted gene 15441 (Gm15441), long non-coding RNA.; predicted gene 15441 ; predicted gene 15441 [gene_biotype:antisense transcript_biotype:antisense]; Novel transcript; Non-coding transcript identified by NONCODE: Antisense	chr3	ncrna
TC0300002551.mm.1	2.77979	3.47563	-1.61982	0.0240516	15495; 100043456; 100043461	Hsd3b4; Gm10681; Gm4450	hydroxy-delta-5-steroid dehydrogenase, 3 beta- and steroid delta-isomerase 4; hydroxy-delta-5-steroid dehydrogenase, 3 beta- and steroid delta-isomerase 4 (Hsd3b4), transcript variant 1, mRNA.; predicted gene 10681; predicted gene 4450; hydroxy-delta-5-steroid dehydrogenase, 3 beta- and steroid delta-isomerase 4 ; predicted gene 10681 (Gm10681), mRNA.; hydroxy-delta-5-steroid dehydrogenase, 3 bet…	NM_001111336; NM_001111336_3; NM_001270429; NM_008294; ENSMUST00000167753; NM_001111336.1; NM_008294.2; uc008qpw.2; uc008qpx.2; uc012cuj.1; uc012cuk.2; XM_001480498.2; XM_001480506.2; XM_003084534.1; ENSMUST00000179429; BC013449; BC132402	RefSeq; ENSEMBL; MGI/Jackson Lab; UCSC Genes; GenBank	Mus musculus hydroxy-delta-5-steroid dehydrogenase, 3 beta- and steroid delta-isomerase 4 (Hsd3b4), transcript variant 1, mRNA.; hydroxy-delta-5-steroid dehydrogenase, 3 beta- and steroid delta-isomerase 4 (Hsd3b4), transcript variant 1, mRNA.; Mus musculus predicted gene 10681 (Gm10681), mRNA.; Mus musculus hydroxy-delta-5-steroid dehydrogenase, 3 beta- and steroid delta-isomerase 4 (Hsd3b4), tr…	chr3	coding
TC0300002554.mm.1	6.82937	8.23766	-2.65423	0.0406443	15496	Hsd3b5	hydroxy-delta-5-steroid dehydrogenase, 3 beta- and steroid delta-isomerase 5; hydroxy-delta-5-steroid dehydrogenase, 3 beta- and steroid delta-isomerase 5	NM_008295; ENSMUST00000044094; BC012715; NM_008295.2; uc008qqb.1	RefSeq; ENSEMBL; GenBank; MGI/Jackson Lab; UCSC Genes	Mus musculus hydroxy-delta-5-steroid dehydrogenase, 3 beta- and steroid delta-isomerase 5 (Hsd3b5), mRNA.; hydroxy-delta-5-steroid dehydrogenase, 3 beta- and steroid delta-isomerase 5 [gene_biotype:protein_coding transcript_biotype:protein_coding]; Mus musculus hydroxy-delta-5-steroid dehydrogenase, 3 beta- and steroid delta-isomerase 5, mRNA (cDNA clone MGC:14041 IMAGE:4193717), complete cds.; h…	chr3	coding
TC0300002650.mm.1	4.02173	3.03098	1.98722	0.00365687				NONMMUT044600	NONCODE	Non-coding transcript identified by NONCODE: Sense No Exonic	chr3	ncrna
TC0300002651.mm.1	2.8091	2.1102	1.62327	0.0364324				NONMMUT044601	NONCODE	Non-coding transcript identified by NONCODE: Sense No Exonic	chr3	ncrna
TC0300002661.mm.1	4.20223	3.00354	2.29531	0.000673122				NONMMUT044615	NONCODE	Non-coding transcript identified by NONCODE: Sense No Exonic	chr3	ncrna
TC0300002690.mm.1	6.44296	5.33342	2.15777	0.000349015				NONMMUT044676	NONCODE	Non-coding transcript identified by NONCODE: Sense No Exonic	chr3	ncrna
TC0300002691.mm.1	6.70197	6.10783	1.50957	0.00074981				NONMMUT044677	NONCODE	Non-coding transcript identified by NONCODE: Sense No Exonic	chr3	ncrna
TC0300002692.mm.1	5.48781	4.81871	1.59007	0.012974				NONMMUT044678	NONCODE	Non-coding transcript identified by NONCODE: Sense No Exonic	chr3	ncrna
TC0300002725.mm.1	11.1923	10.5755	1.53353	0.0245594	14862	Gstm1	glutathione S-transferase, mu 1; glutathione S-transferase, mu 1	NM_010358; ENSMUST00000004140; ENSMUST00000126593; ENSMUST00000153314; BC003822; BC046758; BC091763; NM_010358.5; OTTMUST00000016591; OTTMUST00000016592; OTTMUST00000016593; uc008qxx.2	RefSeq; ENSEMBL; GenBank; MGI/Jackson Lab; Havana transcript; UCSC Genes	Mus musculus glutathione S-transferase, mu 1 (Gstm1), mRNA.; glutathione S-transferase, mu 1 [gene_biotype:protein_coding transcript_biotype:protein_coding]; Mus musculus glutathione S-transferase, mu 1, mRNA (cDNA clone MGC:6200 IMAGE:3600444), complete cds.; Mus musculus glutathione S-transferase, mu 1, mRNA (cDNA clone MGC:57915 IMAGE:5693552), complete cds.; Mus musculus glutathione S-transfe…	chr3	coding
TC0300003247.mm.1	7.86062	7.20687	1.57326	0.00221726	11722	Amy1	amylase 1, salivary; amylase 1, salivary	NM_001110505; NM_007446; ENSMUST00000067980; ENSMUST00000106540; ENSMUST00000142505; ENSMUST00000172885; BC009121; NM_001110505.1; NM_007446.2; OTTMUST00000053503; OTTMUST00000053504; OTTMUST00000053505; OTTMUST00000094851; uc008rba.2; uc008rbb.2	RefSeq; ENSEMBL; GenBank; MGI/Jackson Lab; Havana transcript; UCSC Genes	Mus musculus amylase 1, salivary (Amy1), transcript variant 2, mRNA.; Mus musculus amylase 1, salivary (Amy1), transcript variant 1, mRNA.; amylase 1, salivary [gene_biotype:protein_coding transcript_biotype:protein_coding]; amylase 1, salivary [gene_biotype:protein_coding transcript_biotype:retained_intron]; Mus musculus amylase 1, salivary, mRNA (cDNA clone MGC:11568 IMAGE:3710941), complete cd…	chr3	coding
TC0300002802.mm.1	6.43499	5.69897	1.66558	0.00324484	22329	Vcam1	vascular cell adhesion molecule 1; vascular cell adhesion molecule 1	NM_011693; ENSMUST00000029574; BC011159; BC029823; NM_011693.3; uc008rbx.1; uc008rby.2	RefSeq; ENSEMBL; GenBank; MGI/Jackson Lab; UCSC Genes	Mus musculus vascular cell adhesion molecule 1 (Vcam1), mRNA.; vascular cell adhesion molecule 1 [gene_biotype:protein_coding transcript_biotype:protein_coding]; Mus musculus vascular cell adhesion molecule 1, mRNA (cDNA clone MGC:18507 IMAGE:4206476), complete cds.; Mus musculus vascular cell adhesion molecule 1, mRNA (cDNA clone MGC:36028 IMAGE:4196681), complete cds.; vascular cell adhesion mo…	chr3	coding
TC0300002817.mm.1	5.51585	4.60638	1.87836	0.0316051				NONMMUT044925	NONCODE	Non-coding transcript identified by NONCODE: Sense No Exonic	chr3	ncrna
TC0300002838.mm.1	7.74505	6.67023	2.10645	0.000133242	99887	Tmem56	transmembrane protein 56; transmembrane protein 56	NM_178936; ENSMUST00000029777; ENSMUST00000123427; ENSMUST00000128909; ENSMUST00000135818; ENSMUST00000137234; ENSMUST00000151058; ENSMUST00000155309; BC040365; NM_178936.3; OTTMUST00000081848; OTTMUST00000081849; OTTMUST00000081850; OTTMUST00000081851; OTTMUST00000081852; OTTMUST00000081853; OTTMUST00000081854; NONMMUT045017; NONMMUT045019; NONMMUT045020; uc008rdt.1; uc008rdu.1; uc008rdv.1; uc00…	RefSeq; ENSEMBL; GenBank; MGI/Jackson Lab; Havana transcript; NONCODE; UCSC Genes	Mus musculus transmembrane protein 56 (Tmem56), mRNA.; transmembrane protein 56 [gene_biotype:protein_coding transcript_biotype:protein_coding]; transmembrane protein 56 [gene_biotype:protein_coding transcript_biotype:processed_transcript]; Mus musculus transmembrane protein 56, mRNA (cDNA clone MGC:25917 IMAGE:4223855), complete cds.; transmembrane protein 56 ; transmembrane protein 56[gene_biot…	chr3	coding
TC0300002847.mm.1	9.55895	8.87494	1.6066	0.00182228	19299	Abcd3	ATP-binding cassette, sub-family D (ALD), member 3; ATP-binding cassette, sub-family D (ALD), member 3	NM_008991; ENSMUST00000029770; ENSMUST00000161742; ENSMUST00000162262; ENSMUST00000162299; BC009119; BC054446; NM_008991.2; OTTMUST00000077011; OTTMUST00000077012; OTTMUST00000077013; OTTMUST00000077014; NONMMUT045042; NONMMUT045045; NONMMUT045046; uc008reg.1	RefSeq; ENSEMBL; GenBank; MGI/Jackson Lab; Havana transcript; NONCODE; UCSC Genes	Mus musculus ATP-binding cassette, sub-family D (ALD), member 3 (Abcd3), mRNA.; ATP-binding cassette, sub-family D (ALD), member 3 [gene_biotype:protein_coding transcript_biotype:protein_coding]; ATP-binding cassette, sub-family D (ALD), member 3 ; Mus musculus ATP-binding cassette, sub-family D (ALD), member 3, mRNA (cDNA clone MGC:6967 IMAGE:3154529), complete cds.; Mus musculus ATP-binding cas…	chr3	coding
TC0300002912.mm.1	3.52292	4.88678	-2.57373	0.00510243	71481	Alpk1	alpha-kinase 1; alpha-kinase 1	NM_027808; ENSMUST00000029662; ENSMUST00000159720; ENSMUST00000160586; ENSMUST00000161239; ENSMUST00000162859; NM_027808.1; OTTMUST00000077677; OTTMUST00000077679; OTTMUST00000080786; OTTMUST00000080787; OTTMUST00000080788; NONMMUT045208; uc008rhj.2; uc008rhl.1; uc012cxm.1	RefSeq; ENSEMBL; MGI/Jackson Lab; Havana transcript; NONCODE; UCSC Genes	Mus musculus alpha-kinase 1 (Alpk1), mRNA.; alpha-kinase 1 [gene_biotype:protein_coding transcript_biotype:protein_coding]; alpha-kinase 1 [gene_biotype:protein_coding transcript_biotype:retained_intron]; alpha-kinase 1 [gene_biotype:protein_coding transcript_biotype:processed_transcript]; alpha-kinase 1 ; alpha-kinase 1[gene_biotype:protein_coding transcript_biotype:protein_coding]; alpha-kinase…	chr3	coding
TC0300002955.mm.1	9.34753	8.74286	1.52063	0.000393585	15107	Hadh	hydroxyacyl-Coenzyme A dehydrogenase; hydroxyacyl-Coenzyme A dehydrogenase ; hydroxyacyl-Coenzyme A dehydrogenase (Hadh), nuclear gene encoding mitochondrial protein, mRNA.	NM_008212; ENSMUST00000029610; ENSMUST00000152427; BC064712; NM_008212.3; OTTMUST00000071450; OTTMUST00000071451; uc008rjl.1; uc008rjm.1	RefSeq; ENSEMBL; GenBank; MGI/Jackson Lab; Havana transcript; UCSC Genes	Mus musculus hydroxyacyl-Coenzyme A dehydrogenase (Hadh), mRNA.; hydroxyacyl-Coenzyme A dehydrogenase [gene_biotype:protein_coding transcript_biotype:protein_coding]; hydroxyacyl-Coenzyme A dehydrogenase [gene_biotype:protein_coding transcript_biotype:retained_intron]; Mus musculus hydroxyacyl-Coenzyme A dehydrogenase, mRNA (cDNA clone MGC:74293 IMAGE:30303218), complete cds.; hydroxyacyl-Coenzym…	chr3	coding
TC0300003016.mm.1	8.23043	7.56975	1.58083	0.000395105	17777	Mttp	microsomal triglyceride transfer protein; microsomal triglyceride transfer protein	NM_001163457; NM_008642; ENSMUST00000029805; ENSMUST00000098580; BC012686; NM_001163457.1; NM_008642.2; NONMMUT045472; NONMMUT045473; uc008rmw.2; uc008rmx.2	RefSeq; ENSEMBL; GenBank; MGI/Jackson Lab; NONCODE; UCSC Genes	Mus musculus microsomal triglyceride transfer protein (Mttp), transcript variant 1, mRNA.; Mus musculus microsomal triglyceride transfer protein (Mttp), transcript variant 2, mRNA.; microsomal triglyceride transfer protein [gene_biotype:protein_coding transcript_biotype:protein_coding]; Mus musculus microsomal triglyceride transfer protein, mRNA (cDNA clone MGC:13921 IMAGE:4163901), complete cds.…	chr3	coding
TC0300003103.mm.1	6.19856	5.56538	1.55098	0.00041792	56629	Dnase2b	deoxyribonuclease II beta; deoxyribonuclease II beta	NM_019957; ENSMUST00000029836; BC075661; NM_019957.4; OTTMUST00000053128; uc008rrn.2; uc008rro.2	RefSeq; ENSEMBL; GenBank; MGI/Jackson Lab; Havana transcript; UCSC Genes	Mus musculus deoxyribonuclease II beta (Dnase2b), mRNA.; deoxyribonuclease II beta [gene_biotype:protein_coding transcript_biotype:protein_coding]; Mus musculus deoxyribonuclease II beta, mRNA (cDNA clone MGC:100000 IMAGE:30606058), complete cds.; deoxyribonuclease II beta ; deoxyribonuclease II beta[gene_biotype:protein_coding transcript_biotype:protein_coding]	chr3	coding
TC0300003127.mm.1	2.91744	2.17811	1.6694	0.0205028				NONMMUT045737	NONCODE	Non-coding transcript identified by NONCODE: Linc	chr3	ncrna
TC0300003173.mm.1	9.07166	8.07546	1.99474	0.000454357	11364	Acadm	acyl-Coenzyme A dehydrogenase, medium chain; acyl-Coenzyme A dehydrogenase, medium chain	NM_007382; ENSMUST00000072697; ENSMUST00000130713; ENSMUST00000135724; ENSMUST00000137161; ENSMUST00000150070; ENSMUST00000156310; BC013498; NM_007382.4; OTTMUST00000077658; OTTMUST00000077701; OTTMUST00000077702; OTTMUST00000077703; OTTMUST00000077704; OTTMUST00000077705; uc008ruj.1; NONMMUT045854; NONMMUT045855; NONMMUT045856	RefSeq; ENSEMBL; GenBank; MGI/Jackson Lab; Havana transcript; UCSC Genes; NONCODE	Mus musculus acyl-Coenzyme A dehydrogenase, medium chain (Acadm), mRNA.; acyl-Coenzyme A dehydrogenase, medium chain [gene_biotype:protein_coding transcript_biotype:protein_coding]; acyl-Coenzyme A dehydrogenase, medium chain [gene_biotype:protein_coding transcript_biotype:retained_intron]; acyl-Coenzyme A dehydrogenase, medium chain [gene_biotype:protein_coding transcript_biotype:nonsense_mediat…	chr3	coding
TC0300003194.mm.1	9.43379	8.71248	1.64867	0.00943928	107869	Cth	cystathionase (cystathionine gamma-lyase); cystathionase (cystathionine gamma-lyase)	NM_145953; ENSMUST00000118539; ENSMUST00000125028; ENSMUST00000129805; BC019483; NM_145953.2; OTTMUST00000073720; OTTMUST00000073721; OTTMUST00000073722; uc008rvj.1	RefSeq; ENSEMBL; GenBank; MGI/Jackson Lab; Havana transcript; UCSC Genes	Mus musculus cystathionase (cystathionine gamma-lyase) (Cth), mRNA.; cystathionase (cystathionine gamma-lyase) [gene_biotype:protein_coding transcript_biotype:protein_coding]; cystathionase (cystathionine gamma-lyase) [gene_biotype:protein_coding transcript_biotype:retained_intron]; cystathionase (cystathionine gamma-lyase) [gene_biotype:protein_coding transcript_biotype:processed_transcript]; Mu…	chr3	coding
TC0400000038.mm.1	3.05861	4.23547	-2.26083	0.0267984				NONMMUT046037; NovelTID_00004579	NONCODE; Luo lincRNA	Non-coding transcript identified by NONCODE: Linc; Non-coding transcript identified by Luo, et al.	chr4	ncrna
TC0400000133.mm.1	7.39699	6.43532	1.94757	0.00244606	100201	Tmem64	transmembrane protein 64; transmembrane protein 64	NM_181401; ENSMUST00000062684; BC030341; NM_181401.3; OTTMUST00000010370; uc008sbk.2	RefSeq; ENSEMBL; GenBank; MGI/Jackson Lab; Havana transcript; UCSC Genes	Mus musculus transmembrane protein 64 (Tmem64), mRNA.; transmembrane protein 64 [gene_biotype:protein_coding transcript_biotype:protein_coding]; Mus musculus transmembrane protein 64, mRNA (cDNA clone MGC:40684 IMAGE:3661112), complete cds.; transmembrane protein 64 ; transmembrane protein 64[gene_biotype:protein_coding transcript_biotype:protein_coding]	chr4	coding
TC0400000335.mm.1	6.54447	7.84718	-2.46692	0.00903151				KnowTID_00005258; NONMMUT046750	Luo lincRNA; NONCODE	Non-coding transcript identified by Luo, et al.; Non-coding transcript identified by NONCODE: Linc	chr4	ncrna
TC0400000659.mm.1	8.29968	7.27458	2.03511	0.000666637	72479	Hsdl2	hydroxysteroid dehydrogenase like 2; hydroxysteroid dehydrogenase like 2	NM_024255; ENSMUST00000030078; ENSMUST00000107528; ENSMUST00000128792; BC002211; NM_024255.3; OTTMUST00000016976; OTTMUST00000016977; OTTMUST00000016978; uc008szy.2; uc008szz.2	RefSeq; ENSEMBL; GenBank; MGI/Jackson Lab; Havana transcript; UCSC Genes	Mus musculus hydroxysteroid dehydrogenase like 2 (Hsdl2), transcript variant 1, mRNA.; hydroxysteroid dehydrogenase like 2 [gene_biotype:protein_coding transcript_biotype:protein_coding]; Mus musculus hydroxysteroid dehydrogenase like 2, mRNA (cDNA clone MGC:7467 IMAGE:3490303), complete cds.; hydroxysteroid dehydrogenase like 2 ; hydroxysteroid dehydrogenase like 2[gene_biotype:protein_coding tr…	chr4	coding
TC0400000721.mm.1	8.70303	11.5466	-7.17807	0.0200426	18406	Orm2	orosomucoid 2; orosomucoid 2	NM_011016; ENSMUST00000075341; BC057985; NM_011016.2; OTTMUST00000000782; uc008tga.1	RefSeq; ENSEMBL; GenBank; MGI/Jackson Lab; Havana transcript; UCSC Genes	Mus musculus orosomucoid 2 (Orm2), mRNA.; orosomucoid 2 [gene_biotype:protein_coding transcript_biotype:protein_coding]; Mus musculus orosomucoid 2, mRNA (cDNA clone MGC:68161 IMAGE:5126236), complete cds.; orosomucoid 2 ; orosomucoid 2[gene_biotype:protein_coding transcript_biotype:protein_coding]	chr4	coding
TC0400000971.mm.1	6.01109	5.41241	1.51433	0.0370047				NONMMUT048226	NONCODE	Non-coding transcript identified by NONCODE: Sense No Exonic	chr4	ncrna
TC0400000993.mm.1	9.38	8.79189	1.50328	0.00531285	30924	Angptl3	angiopoietin-like 3; angiopoietin-like 3	NM_013913; ENSMUST00000030280; ENSMUST00000125546; ENSMUST00000136091; BC019491; NM_013913.3; OTTMUST00000019815; OTTMUST00000019816; OTTMUST00000019817; NONMMUT048268; uc008tur.1; uc008tus.1	RefSeq; ENSEMBL; GenBank; MGI/Jackson Lab; Havana transcript; NONCODE; UCSC Genes	Mus musculus angiopoietin-like 3 (Angptl3), mRNA.; angiopoietin-like 3 [gene_biotype:protein_coding transcript_biotype:protein_coding]; angiopoietin-like 3 [gene_biotype:protein_coding transcript_biotype:processed_transcript]; Mus musculus angiopoietin-like 3, mRNA (cDNA clone MGC:28584 IMAGE:4211688), complete cds.; angiopoietin-like 3 ; angiopoietin-like 3[gene_biotype:protein_coding transcript…	chr4	coding
TC0400001039.mm.1	3.95877	3.24817	1.63649	0.00281941	16847	Lepr	leptin receptor; leptin receptor	NM_001122899; NM_010704; NM_146146; ENSMUST00000037552; ENSMUST00000102777; ENSMUST00000106921; ENSMUST00000128948; ENSMUST00000145024; ENSMUST00000151733; ENSMUST00000156402; BC082551; NM_001122899.1; NM_010704.2; NM_146146.2; OTTMUST00000019183; OTTMUST00000019184; OTTMUST00000019186; OTTMUST00000019187; OTTMUST00000019188; OTTMUST00000019189; OTTMUST00000019190; uc008tvw.2; uc008tvx.2; uc008tv…	RefSeq; ENSEMBL; GenBank; MGI/Jackson Lab; Havana transcript; UCSC Genes	Mus musculus leptin receptor (Lepr), transcript variant 3, mRNA.; Mus musculus leptin receptor (Lepr), transcript variant 2, mRNA.; Mus musculus leptin receptor (Lepr), transcript variant 1, mRNA.; leptin receptor [gene_biotype:protein_coding transcript_biotype:protein_coding]; leptin receptor [gene_biotype:protein_coding transcript_biotype:processed_transcript]; Mus musculus leptin receptor, mRN…	chr4	coding
TC0400001107.mm.1	9.15316	9.81433	-1.58136	0.0182725	74754	Dhcr24	24-dehydrocholesterol reductase; 24-dehydrocholesterol reductase	NM_053272; ENSMUST00000047973; BC019797; NM_053272.2; OTTMUST00000018774; uc008tyl.1	RefSeq; ENSEMBL; GenBank; MGI/Jackson Lab; Havana transcript; UCSC Genes	Mus musculus 24-dehydrocholesterol reductase (Dhcr24), mRNA.; 24-dehydrocholesterol reductase [gene_biotype:protein_coding transcript_biotype:protein_coding]; Mus musculus 24-dehydrocholesterol reductase, mRNA (cDNA clone MGC:30547 IMAGE:5054108), complete cds.; 24-dehydrocholesterol reductase ; 24-dehydrocholesterol reductase[gene_biotype:protein_coding transcript_biotype:protein_coding]	chr4	coding
TC0400001221.mm.1	9.77432	8.56271	2.31595	0.00114003	277753	Cyp4a12a	cytochrome P450, family 4, subfamily a, polypeptide 12a; cytochrome P450, family 4, subfamily a, polypeptide 12a	NM_177406; ENSMUST00000084343; BC014721; BC025936; BC026582; BC031141; BC033924; NM_177406.3; OTTMUST00000019514; uc008uer.1	RefSeq; ENSEMBL; GenBank; MGI/Jackson Lab; Havana transcript; UCSC Genes	Mus musculus cytochrome P450, family 4, subfamily a, polypeptide 12a (Cyp4a12a), mRNA.; cytochrome P450, family 4, subfamily a, polypeptide 12a [gene_biotype:protein_coding transcript_biotype:protein_coding]; Mus musculus cytochrome P450, family 4, subfamily a, polypeptide 12a, mRNA (cDNA clone MGC:25972 IMAGE:4240359), complete cds.; Mus musculus cytochrome P450, family 4, subfamily a, polypepti…	chr4	coding
TC0400001223.mm.1	9.91601	8.64136	2.4194	0.00156313	13118	Cyp4a12b	cytochrome P450, family 4, subfamily a, polypeptide 12B; cytochrome P450, family 4, subfamily a, polypeptide 12B	NM_172306; ENSMUST00000094887; BC060945; NM_172306.2; OTTMUST00000019517; uc008ues.1	RefSeq; ENSEMBL; GenBank; MGI/Jackson Lab; Havana transcript; UCSC Genes	Mus musculus cytochrome P450, family 4, subfamily a, polypeptide 12B (Cyp4a12b), mRNA.; cytochrome P450, family 4, subfamily a, polypeptide 12B [gene_biotype:protein_coding transcript_biotype:protein_coding]; Mus musculus cytochrome P450, family 4, subfamily a, polypeptide 12B, mRNA (cDNA clone MGC:74033 IMAGE:30304458), complete cds.; cytochrome P450, family 4, subfamily a, polypeptide 12B ; cyt…	chr4	coding
TC0400001225.mm.1	2.55427	1.92599	1.54572	0.0397873				NONMMUT048781; NONMMUT048782; uc008ueu.1	NONCODE; UCSC Genes	Non-coding transcript identified by NONCODE: Antisense; Mus musculus in vitro fertilized eggs cDNA, RIKEN full-length enriched library, clone:7420402G03 product:unclassifiable, full insert sequence.	chr4	ncrna
TC0400004187.mm.1	11.4036	7.16178	18.9197	3.95574e-06	13117; 666168	Cyp4a10; Cyp4a31	cytochrome P450, family 4, subfamily a, polypeptide 10; cytochrome P450, family 4, subfamily a, polypeptide 31; cytochrome P450, family 4, subfamily a, polypeptide 10	NM_010011; ENSMUST00000058785; ENSMUST00000094886; BC010747; BC013476; BC051049; NM_010011.3; OTTMUST00000019512; OTTMUST00000019513; uc008uew.2; uc008uex.2; uc008uey.2	RefSeq; ENSEMBL; GenBank; MGI/Jackson Lab; Havana transcript; UCSC Genes	Mus musculus cytochrome P450, family 4, subfamily a, polypeptide 10 (Cyp4a10), mRNA.; cytochrome P450, family 4, subfamily a, polypeptide 10 [gene_biotype:protein_coding transcript_biotype:protein_coding]; Mus musculus cytochrome P450, family 4, subfamily a, polypeptide 10, mRNA (cDNA clone MGC:18335 IMAGE:4242518), complete cds.; Mus musculus cytochrome P450, family 4, subfamily a, polypeptide 3…	chr4	coding
TC0400004188.mm.1	10.5125	7.16485	10.1797	1.88832e-05	100040843	Cyp4a32	cytochrome P450, family 4, subfamily a, polypeptide 32; cytochrome P450, family 4, subfamily a, polypeptide 32	NM_001100181; ENSMUST00000084342; ENSMUST00000129918; NM_001100181.1; OTTMUST00000019698; OTTMUST00000019699; uc008ufa.1	RefSeq; ENSEMBL; MGI/Jackson Lab; Havana transcript; UCSC Genes	Mus musculus cytochrome P450, family 4, subfamily a, polypeptide 32 (Cyp4a32), mRNA.; cytochrome P450, family 4, subfamily a, polypeptide 32 [gene_biotype:protein_coding transcript_biotype:protein_coding]; cytochrome P450, family 4, subfamily a, polypeptide 32 [gene_biotype:protein_coding transcript_biotype:processed_transcript]; cytochrome P450, family 4, subfamily a, polypeptide 32 ; cytochrome…	chr4	coding
TC0400001229.mm.1	10.3176	6.72123	12.0953	2.61976e-05	666168	Cyp4a31	cytochrome P450, family 4, subfamily a, polypeptide 31; cytochrome P450, family 4, subfamily a, polypeptide 31	NM_001252539; NM_201640; ENSMUST00000030480; ENSMUST00000030486; ENSMUST00000126645; ENSMUST00000141033; NM_001252539.1; NM_201640.3; OTTMUST00000019527; OTTMUST00000019528; OTTMUST00000019529; uc029uyu.1; uc029uyv.1	RefSeq; ENSEMBL; MGI/Jackson Lab; Havana transcript; UCSC Genes	Mus musculus cytochrome P450, family 4, subfamily a, polypeptide 31 (Cyp4a31), transcript variant 2, mRNA.; Mus musculus cytochrome P450, family 4, subfamily a, polypeptide 31 (Cyp4a31), transcript variant 1, mRNA.; cytochrome P450, family 4, subfamily a, polypeptide 31 [gene_biotype:protein_coding transcript_biotype:protein_coding]; cytochrome P450, family 4, subfamily a, polypeptide 31 ; cytoch…	chr4	coding
TC0400001310.mm.1	8.40952	9.07269	-1.58356	0.000551784				NONMMUT048976; NONMMUT048977; NONMMUT048978; NONMMUT048979; NONMMUT048980; NONMMUT048981; NONMMUT048982; NONMMUT048983; NONMMUT048984; NONMMUT048985; NONMMUT048986; NONMMUT048987; NONMMUT048988; NONMMUT048989; NONMMUT048990; NONMMUT048991; NONMMUT048992; NONMMUT048993; NONMMUT048994; NONMMUT048995; NONMMUT048996; NONMMUT048997; NONMMUT048998; NONMMUT048999; NONMMUT049000; NONMMUT049001; NONMMUT04…	NONCODE; Luo lincRNA	Non-coding transcript identified by NONCODE: Linc; Non-coding transcript identified by Luo, et al.	chr4	ncrna
TC0400001728.mm.1	6.44303	7.06694	-1.54105	0.00202792	66259	Camk2n1	calcium/calmodulin-dependent protein kinase II inhibitor 1; calcium/calmodulin-dependent protein kinase II inhibitor 1	NM_025451; ENSMUST00000050918; NM_025451.2; OTTMUST00000023263; NONMMUT050210; uc008vkz.2	RefSeq; ENSEMBL; MGI/Jackson Lab; Havana transcript; NONCODE; UCSC Genes	Mus musculus calcium/calmodulin-dependent protein kinase II inhibitor 1 (Camk2n1), mRNA.; calcium/calmodulin-dependent protein kinase II inhibitor 1 [gene_biotype:protein_coding transcript_biotype:protein_coding]; calcium/calmodulin-dependent protein kinase II inhibitor 1 ; calcium/calmodulin-dependent protein kinase II inhibitor 1[gene_biotype:protein_coding transcript_biotype:protein_coding]; N…	chr4	coding
TC0400001857.mm.1	4.8969	3.94456	1.935	0.0191542				NONMMUT050473	NONCODE	Non-coding transcript identified by NONCODE: Sense No Exonic	chr4	ncrna
TC0400001924.mm.1	5.34594	4.60744	1.66844	0.0183477	17769	Mthfr	5,10-methylenetetrahydrofolate reductase; 5,10-methylenetetrahydrofolate reductase	NM_001161798; NM_010840; NR_027809; ENSMUST00000069604; ENSMUST00000097788; ENSMUST00000125978; ENSMUST00000141283; ENSMUST00000145115; ENSMUST00000152498; ENSMUST00000156113; BC051017; BC052466; NM_001161798.1; NM_010840.3; NR_027809.1; OTTMUST00000023686; OTTMUST00000023687; OTTMUST00000023688; OTTMUST00000023689; OTTMUST00000023690; OTTMUST00000023691; OTTMUST00000023692; NONMMUT050580; uc008v…	RefSeq; ENSEMBL; GenBank; MGI/Jackson Lab; Havana transcript; NONCODE; UCSC Genes	Mus musculus 5,10-methylenetetrahydrofolate reductase (Mthfr), transcript variant 1, mRNA.; Mus musculus 5,10-methylenetetrahydrofolate reductase (Mthfr), transcript variant 2, mRNA.; Mus musculus 5,10-methylenetetrahydrofolate reductase (Mthfr), transcript variant 3, non-coding RNA.; 5,10-methylenetetrahydrofolate reductase [gene_biotype:protein_coding transcript_biotype:protein_coding]; 5,10-me…	chr4	coding
TC0400001964.mm.1	9.70954	10.5257	-1.76076	0.0321499		n-R5s193	nuclear encoded rRNA 5S 193 [Source:MGI Symbol;Acc:MGI:4422058]	ENSMUST00000082864	ENSEMBL	nuclear encoded rRNA 5S 193 [gene_biotype:rRNA transcript_biotype:rRNA]	chr4	ncrna
TC0400002150.mm.1	2.89975	4.96492	-4.18484	0.0233903				NONMMUT046036; NovelTID_00004880	NONCODE; Luo lincRNA	Non-coding transcript identified by NONCODE: Linc; Non-coding transcript identified by Luo, et al.	chr4	ncrna
TC0400002213.mm.1	4.04407	2.05778	3.96215	0.011526		Gm11832; RP23-242O9.4	predicted gene 11832 [Source:MGI Symbol;Acc:MGI:3650310]; novel transcript	ENSMUST00000148576; OTTMUST00000010246; NONMMUT046213; uc008rzu.1	ENSEMBL; Havana transcript; NONCODE; UCSC Genes	predicted gene 11832 [gene_biotype:antisense transcript_biotype:antisense]; novel transcript; Non-coding transcript identified by NONCODE: Antisense; Mus musculus adult male liver tumor cDNA, RIKEN full-length enriched library, clone:C730020I24 product:unclassifiable, full insert sequence.	chr4	ncrna
TC0400002244.mm.1	8.68095	7.84544	1.7845	0.000543546	67460	Decr1	2,4-dienoyl CoA reductase 1, mitochondrial; 2,4-dienoyl CoA reductase 1, mitochondrial	NM_026172; ENSMUST00000029877; ENSMUST00000150464; ENSMUST00000154639; BC046972; NM_026172.3; OTTMUST00000010471; OTTMUST00000010472; OTTMUST00000010473; NONMMUT046299; NONMMUT046300; uc008sbm.1	RefSeq; ENSEMBL; GenBank; MGI/Jackson Lab; Havana transcript; NONCODE; UCSC Genes	Mus musculus 2,4-dienoyl CoA reductase 1, mitochondrial (Decr1), mRNA.; 2,4-dienoyl CoA reductase 1, mitochondrial [gene_biotype:protein_coding transcript_biotype:protein_coding]; 2,4-dienoyl CoA reductase 1, mitochondrial [gene_biotype:protein_coding transcript_biotype:processed_transcript]; Mus musculus 2,4-dienoyl CoA reductase 1, mitochondrial, mRNA (cDNA clone MGC:54470 IMAGE:6469277), compl…	chr4	coding
TC0400002332.mm.1	10.7983	9.93231	1.82256	0.04051	57421	Bhmt-ps1	betaine-homocysteine methyltransferase, pseudogene 1	OTTMUST00000010847; ENSMUST00000178743	Havana transcript; ENSEMBL	betaine-homocysteine methyltransferase, pseudogene 1[gene_biotype:processed_pseudogene transcript_biotype:processed_pseudogene]; betaine-homocysteine methyltransferase, pseudogene 1 [gene_biotype:processed_pseudogene transcript_biotype:processed_pseudogene]	chr4	ncrna
TC0400002373.mm.1	6.8777	5.95079	1.9012	0.000864497	108767	Pnrc1	proline-rich nuclear receptor coactivator 1; Synthetic construct Mus musculus clone IMAGE:100063859, MGC:193326 proline-rich nuclear receptor coactivator 1 (Pnrc1) mRNA, encodes complete protein.; proline-rich nuclear receptor coactivator 1	NM_001033225; ENSMUST00000049357; ENSMUST00000137589; ENSMUST00000155616; BC160211; NM_001033225.2; OTTMUST00000010990; OTTMUST00000010991; OTTMUST00000070849; NONMMUT046624; uc008sfu.1	RefSeq; ENSEMBL; GenBank; MGI/Jackson Lab; Havana transcript; NONCODE; UCSC Genes	Mus musculus proline-rich nuclear receptor coactivator 1 (Pnrc1), mRNA.; proline-rich nuclear receptor coactivator 1 [gene_biotype:protein_coding transcript_biotype:protein_coding]; proline-rich nuclear receptor coactivator 1 [gene_biotype:protein_coding transcript_biotype:processed_transcript]; Synthetic construct Mus musculus clone IMAGE:100063859, MGC:193326 proline-rich nuclear receptor coact…	chr4	coding
TC0400002425.mm.1	8.04271	8.86351	-1.76638	0.0240069		Gm25581	predicted gene, 25581 [Source:MGI Symbol;Acc:MGI:5455358]	ENSMUST00000083410	ENSEMBL	predicted gene, 25581 [gene_biotype:snRNA transcript_biotype:snRNA]	chr4	ncrna
TC0400002469.mm.1	4.90348	5.55076	-1.56621	0.0078466	329828	AI464131	expressed sequence AI464131; expressed sequence AI464131	NM_001085515; ENSMUST00000054920; ENSMUST00000149596; BC137640; BC140956; NM_001085515.2; OTTMUST00000015209; OTTMUST00000015210; uc008sit.2	RefSeq; ENSEMBL; GenBank; MGI/Jackson Lab; Havana transcript; UCSC Genes	Mus musculus expressed sequence AI464131 (AI464131), mRNA.; expressed sequence AI464131 [gene_biotype:protein_coding transcript_biotype:protein_coding]; Mus musculus expressed sequence AI464131, mRNA (cDNA clone MGC:169264 IMAGE:8860659), complete cds.; Mus musculus expressed sequence AI464131, mRNA (cDNA clone MGC:175917 IMAGE:9055568), complete cds.; expressed sequence AI464131 ; novel protein …	chr4	coding
TC0400002569.mm.1	3.97501	3.38473	1.50554	0.0113067				NONMMUT047081	NONCODE	Non-coding transcript identified by NONCODE: Sense No Exonic	chr4	ncrna
TC0400002634.mm.1	7.50196	6.90999	1.50731	0.000336953	230161	Acnat1	acyl-coenzyme A amino acid N-acyltransferase 1; acyl-coenzyme A amino acid N-acyltransferase 1	NM_001164565; ENSMUST00000095086; ENSMUST00000107697; ENSMUST00000135976; ENSMUST00000150392; NM_001164565.1; OTTMUST00000018931; OTTMUST00000018932; OTTMUST00000018933; OTTMUST00000018934; NONMMUT047227; NONMMUT047228; NONMMUT047229; uc008svr.2	RefSeq; ENSEMBL; MGI/Jackson Lab; Havana transcript; NONCODE; UCSC Genes	Mus musculus acyl-coenzyme A amino acid N-acyltransferase 1 (Acnat1), mRNA.; acyl-coenzyme A amino acid N-acyltransferase 1 [gene_biotype:protein_coding transcript_biotype:protein_coding]; acyl-coenzyme A amino acid N-acyltransferase 1 [gene_biotype:protein_coding transcript_biotype:processed_transcript]; acyl-coenzyme A amino acid N-acyltransferase 1 ; acyl-coenzyme A amino acid N-acyltransferas…	chr4	coding
TC0400002635.mm.1	7.71446	6.6852	2.04098	0.0012519				KnowTID_00005416; KnowTID_00005417; NONMMUT047231; NONMMUT047232	Luo lincRNA; NONCODE	Non-coding transcript identified by Luo, et al.; Non-coding transcript identified by NONCODE: Linc	chr4	ncrna
TC0400002653.mm.1	10.3432	11.029	-1.60862	0.0269957		Gm22042	predicted gene, 22042 [Source:MGI Symbol;Acc:MGI:5451819]	ENSMUST00000082989	ENSEMBL	predicted gene, 22042 [gene_biotype:snRNA transcript_biotype:snRNA]	chr4	ncrna
TC0400002798.mm.1	3.27735	3.8651	-1.5029	0.0163354				NONMMUT047610; NovelTID_00004934	NONCODE; Luo lincRNA	Non-coding transcript identified by NONCODE: Linc; Non-coding transcript identified by Luo, et al.	chr4	ncrna
TC0400002979.mm.1	7.60787	6.22756	2.60325	0.016036		Gm12551	predicted gene 12551 [Source:MGI Symbol;Acc:MGI:3651664]	ENSMUST00000122073; OTTMUST00000017237	ENSEMBL; Havana transcript	predicted gene 12551 [gene_biotype:unprocessed_pseudogene transcript_biotype:unprocessed_pseudogene]; adipose differentiation related protein (Adfp) pseudogene[gene_biotype:unprocessed_pseudogene transcript_biotype:unprocessed_pseudogene]	chr4	ncrna
TC0400002980.mm.1	9.8889	8.53112	2.5629	0.00692206	11520	Plin2	perilipin 2; perilipin 2	NM_007408; ENSMUST00000000466; ENSMUST00000134094; ENSMUST00000134437; ENSMUST00000138605; ENSMUST00000140382; ENSMUST00000147097; ENSMUST00000149700; ENSMUST00000154999; BC054766; NM_007408.3; OTTMUST00000017238; OTTMUST00000017239; OTTMUST00000017240; OTTMUST00000017241; OTTMUST00000017242; OTTMUST00000017243; OTTMUST00000017648; OTTMUST00000051107; uc008tlz.1	RefSeq; ENSEMBL; GenBank; MGI/Jackson Lab; Havana transcript; UCSC Genes	Mus musculus perilipin 2 (Plin2), mRNA.; perilipin 2 [gene_biotype:protein_coding transcript_biotype:protein_coding]; perilipin 2 [gene_biotype:protein_coding transcript_biotype:processed_transcript]; Mus musculus adipose differentiation related protein, mRNA (cDNA clone MGC:64802 IMAGE:6414796), complete cds.; perilipin 2 ; perilipin 2[gene_biotype:protein_coding transcript_biotype:protein_codin…	chr4	coding
TC0400003204.mm.1	4.90934	5.52915	-1.53667	0.0192866		Gm12744; RP23-97O7.11	predicted gene 12744 [Source:MGI Symbol;Acc:MGI:3702539]; putative transcript	ENSMUST00000146976; OTTMUST00000018776; NONMMUT048484	ENSEMBL; Havana transcript; NONCODE	predicted gene 12744 [gene_biotype:antisense transcript_biotype:antisense]; putative transcript; Non-coding transcript identified by NONCODE: Antisense	chr4	ncrna
TC0400003217.mm.1	5.10564	4.36961	1.66559	0.00509986		LOC100862108	PREDICTED: uncharacterized LOC100862108 (LOC100862108), miscRNA.	XR_140660.1	MGI/Jackson Lab	PREDICTED: uncharacterized LOC100862108 (LOC100862108), miscRNA.	chr4	ncrna
TC0400003230.mm.1	8.53602	7.416	2.1735	0.00144014	12896	Cpt2	carnitine palmitoyltransferase 2; carnitine palmitoyltransferase 2	NM_009949; ENSMUST00000030345; ENSMUST00000106719; ENSMUST00000106720; ENSMUST00000131644; ENSMUST00000141738; ENSMUST00000175651; BC138514; BC145859; NM_009949.2; OTTMUST00000021110; OTTMUST00000021111; OTTMUST00000021180; OTTMUST00000021181; OTTMUST00000021182; OTTMUST00000110992; uc008uan.2	RefSeq; ENSEMBL; GenBank; MGI/Jackson Lab; Havana transcript; UCSC Genes	Mus musculus carnitine palmitoyltransferase 2 (Cpt2), mRNA.; carnitine palmitoyltransferase 2 [gene_biotype:protein_coding transcript_biotype:protein_coding]; carnitine palmitoyltransferase 2 [gene_biotype:protein_coding transcript_biotype:processed_transcript]; carnitine palmitoyltransferase 2 [gene_biotype:protein_coding transcript_biotype:retained_intron]; Mus musculus carnitine palmitoyltrans…	chr4	coding
TC0400003266.mm.1	4.02445	5.2122	-2.27798	0.00059233		Ttc39aos1; RP23-110H24.2; Gm12750	Ttc39a opposite strand RNA 1 [Source:MGI Symbol;Acc:MGI:3651956]; novel transcript; predicted gene 12750	ENSMUST00000150239; ENSMUST00000154561; OTTMUST00000018855; OTTMUST00000018856; uc008uch.1; KnowTID_00005456; NONMMUT048652; NONMMUT048653; NONMMUT048654; NONMMUT048655; NONMMUT048656; NONMMUT048657; NONMMUT048658; NONMMUT048659; NONMMUT048660; NONMMUT048661; NONMMUT048662; NONMMUT048663	ENSEMBL; Havana transcript; UCSC Genes; Luo lincRNA; NONCODE	Ttc39a opposite strand RNA 1 [gene_biotype:antisense transcript_biotype:antisense]; novel transcript; predicted gene 12750 ; Non-coding transcript identified by Luo, et al.; Non-coding transcript identified by NONCODE: Linc	chr4	ncrna
TC0400003318.mm.1	12.0459	5.37266	102.057	0.000673157	13119	Cyp4a14	cytochrome P450, family 4, subfamily a, polypeptide 14; cytochrome P450, family 4, subfamily a, polypeptide 14	NM_007822; ENSMUST00000030487; ENSMUST00000124412; NM_007822.2; OTTMUST00000019524; OTTMUST00000019525; NONMMUT048783; uc008uev.2	RefSeq; ENSEMBL; MGI/Jackson Lab; Havana transcript; NONCODE; UCSC Genes	Mus musculus cytochrome P450, family 4, subfamily a, polypeptide 14 (Cyp4a14), mRNA.; cytochrome P450, family 4, subfamily a, polypeptide 14 [gene_biotype:protein_coding transcript_biotype:protein_coding]; cytochrome P450, family 4, subfamily a, polypeptide 14 [gene_biotype:protein_coding transcript_biotype:processed_transcript]; cytochrome P450, family 4, subfamily a, polypeptide 14 ; cytochrome…	chr4	coding
TC0400003321.mm.1	5.24388	4.63274	1.52747	0.0026546	13120	Cyp4b1	cytochrome P450, family 4, subfamily b, polypeptide 1; cytochrome P450, family 4, subfamily b, polypeptide 1	NM_007823; ENSMUST00000102707; ENSMUST00000135569; ENSMUST00000143237; ENSMUST00000145841; BC008996; NM_007823.2; OTTMUST00000019678; OTTMUST00000019679; OTTMUST00000019680; OTTMUST00000019681; uc008ufb.1; uc008ufc.1	RefSeq; ENSEMBL; GenBank; MGI/Jackson Lab; Havana transcript; UCSC Genes	Mus musculus cytochrome P450, family 4, subfamily b, polypeptide 1 (Cyp4b1), mRNA.; cytochrome P450, family 4, subfamily b, polypeptide 1 [gene_biotype:protein_coding transcript_biotype:protein_coding]; cytochrome P450, family 4, subfamily b, polypeptide 1 [gene_biotype:protein_coding transcript_biotype:nonsense_mediated_decay]; cytochrome P450, family 4, subfamily b, polypeptide 1 [gene_biotype:…	chr4	coding
TC0400003450.mm.1	4.00992	3.41132	1.51425	0.0295399				NONMMUT049258	NONCODE	Non-coding transcript identified by NONCODE: Sense No Exonic	chr4	ncrna
TC0400003484.mm.1	4.10709	3.3233	1.72164	0.0112001				NONMMUT049310	NONCODE	Non-coding transcript identified by NONCODE: Sense No Exonic	chr4	ncrna
TC0400003629.mm.1	6.63279	6.04577	1.50214	0.0111738	230779	Serinc2	serine incorporator 2; serine incorporator 2	NM_001253386; NM_172702; ENSMUST00000105996; ENSMUST00000120126; ENSMUST00000122374; ENSMUST00000146478; ENSMUST00000154846; BC031720; NM_001253386.1; NM_172702.3; OTTMUST00000021893; OTTMUST00000021894; OTTMUST00000021895; OTTMUST00000021896; OTTMUST00000021897; uc008uzc.1; uc029uzq.1	RefSeq; ENSEMBL; GenBank; MGI/Jackson Lab; Havana transcript; UCSC Genes	Mus musculus serine incorporator 2 (Serinc2), transcript variant 2, mRNA.; Mus musculus serine incorporator 2 (Serinc2), transcript variant 1, mRNA.; serine incorporator 2 [gene_biotype:protein_coding transcript_biotype:protein_coding]; Mus musculus serine incorporator 2, mRNA (cDNA clone MGC:25877 IMAGE:4209575), complete cds.; serine incorporator 2 ; serine incorporator 2[gene_biotype:protein_c…	chr4	coding
TC0400003855.mm.1	3.46117	4.09409	-1.5507	1.98531e-06	242721; 100316727	Klhdc7a; Mir2139	kelch domain containing 7A; microRNA 2139; kelch domain containing 7A	NM_173427; NR_035519; ENSMUST00000105031; NM_173427.2; OTTMUST00000023384; ENSMUST00000158669; uc008vmt.1	RefSeq; ENSEMBL; MGI/Jackson Lab; Havana transcript; UCSC Genes	Mus musculus kelch domain containing 7A (Klhdc7a), mRNA.; Mus musculus microRNA 2139 (Mir2139), microRNA.; kelch domain containing 7A [gene_biotype:protein_coding transcript_biotype:protein_coding]; kelch domain containing 7A ; kelch domain containing 7A[gene_biotype:protein_coding transcript_biotype:protein_coding]; microRNA 2139 [gene_biotype:miRNA transcript_biotype:miRNA]	chr4	coding
TC0400004074.mm.1	3.37104	4.37889	-2.01091	0.00111405	18628	Per3	period circadian clock 3; period circadian clock 3 ; period homolog 3 (Drosophila) (Per3), mRNA.	NM_001289877; NM_001289878; NM_011067; ENSMUST00000103204; ENSMUST00000128283; ENSMUST00000136398; ENSMUST00000138052; ENSMUST00000138584; BC141032; NM_011067.2; OTTMUST00000023794; OTTMUST00000023795; OTTMUST00000023796; OTTMUST00000074235; OTTMUST00000074236; uc008vye.1; uc008vyh.1; uc008vyi.1; uc012dpx.1; uc012dpy.1; NONMMUT050747; NONMMUT050749; NONMMUT050750; uc008vyg.1	RefSeq; ENSEMBL; GenBank; MGI/Jackson Lab; Havana transcript; UCSC Genes; NONCODE	Mus musculus period circadian clock 3 (Per3), transcript variant 1, mRNA.; Mus musculus period circadian clock 3 (Per3), transcript variant 3, mRNA.; Mus musculus period circadian clock 3 (Per3), transcript variant 2, mRNA.; period circadian clock 3 [gene_biotype:protein_coding transcript_biotype:protein_coding]; period circadian clock 3 [gene_biotype:protein_coding transcript_biotype:retained_in…	chr4	coding
TC0500000015.mm.1	6.11862	5.4611	1.57736	0.000796385	71382	Pex1	peroxisomal biogenesis factor 1; peroxisomal biogenesis factor 1	NM_027777; ENSMUST00000006061; ENSMUST00000121291; ENSMUST00000123268; ENSMUST00000126545; ENSMUST00000142516; ENSMUST00000143132; ENSMUST00000143959; BC090845; NM_027777.1; OTTMUST00000070743; OTTMUST00000070783; OTTMUST00000070784; OTTMUST00000070785; OTTMUST00000070786; OTTMUST00000070787; OTTMUST00000070788; NONMMUT051105; NONMMUT051106; uc008whe.1; uc008whf.1; uc008whg.1	RefSeq; ENSEMBL; GenBank; MGI/Jackson Lab; Havana transcript; NONCODE; UCSC Genes	Mus musculus peroxisomal biogenesis factor 1 (Pex1), transcript variant 2, mRNA.; peroxisomal biogenesis factor 1 [gene_biotype:protein_coding transcript_biotype:protein_coding]; peroxisomal biogenesis factor 1 [gene_biotype:protein_coding transcript_biotype:retained_intron]; peroxisomal biogenesis factor 1 [gene_biotype:protein_coding transcript_biotype:nonsense_mediated_decay]; Mus musculus per…	chr5	coding
TC0500000032.mm.1	6.90702	6.02992	1.83668	0.00123984		Gm26825	predicted gene, 26825 [Source:MGI Symbol;Acc:MGI:5477319]	ENSMUST00000181751	ENSEMBL	predicted gene, 26825 [gene_biotype:lincRNA transcript_biotype:lincRNA]	chr5	ncrna
TC0500000054.mm.1	8.89815	8.2939	1.52019	0.0043556	18670	Abcb4	ATP-binding cassette, sub-family B (MDR/TAP), member 4; ATP-binding cassette, sub-family B (MDR/TAP), member 4	NM_008830; ENSMUST00000003717; BC150687; NM_008830.2; NONMMUT051202; uc008wkr.2; uc008wks.1	RefSeq; ENSEMBL; GenBank; MGI/Jackson Lab; NONCODE; UCSC Genes	Mus musculus ATP-binding cassette, sub-family B (MDR/TAP), member 4 (Abcb4), mRNA.; ATP-binding cassette, sub-family B (MDR/TAP), member 4 [gene_biotype:protein_coding transcript_biotype:protein_coding]; Mus musculus ATP-binding cassette, sub-family B (MDR/TAP), member 4, mRNA (cDNA clone MGC:183598 IMAGE:9087598), complete cds.; ATP-binding cassette, sub-family B (MDR/TAP), member 4 ; Non-coding…	chr5	coding
TC0500000286.mm.1	8.24657	7.29883	1.92885	0.000229025	231086	Hadhb	hydroxyacyl-Coenzyme A dehydrogenase/3-ketoacyl-Coenzyme A thiolase/enoyl-Coenzyme A hydratase (trifunctional protein), beta subunit; hydroxyacyl-Coenzyme A dehydrogenase/3-ketoacyl-Coenzyme A thiolase/enoyl-Coenzyme A hydratase (trifunctional protein), beta subunit ; hydroxyacyl-Coenzyme A dehydrogenase/3-ketoacyl-Coenzyme A thiolase/enoyl-Coenzyme A hydratase (trifunctional protein), beta subun…	NM_001289798; NM_001289799; NM_145558; ENSMUST00000026841; ENSMUST00000114783; ENSMUST00000114786; ENSMUST00000122934; ENSMUST00000123980; ENSMUST00000127364; ENSMUST00000133414; ENSMUST00000141236; BC005585; NM_145558.1; OTTMUST00000060920; OTTMUST00000061035; OTTMUST00000061036; OTTMUST00000061037; OTTMUST00000061038; OTTMUST00000061039; OTTMUST00000061040; OTTMUST00000061041; uc008wve.1; uc008…	RefSeq; ENSEMBL; GenBank; MGI/Jackson Lab; Havana transcript; UCSC Genes; NONCODE	Mus musculus hydroxyacyl-Coenzyme A dehydrogenase/3-ketoacyl-Coenzyme A thiolase/enoyl-Coenzyme A hydratase (trifunctional protein), beta subunit (Hadhb), transcript variant 1, mRNA.; Mus musculus hydroxyacyl-Coenzyme A dehydrogenase/3-ketoacyl-Coenzyme A thiolase/enoyl-Coenzyme A hydratase (trifunctional protein), beta subunit (Hadhb), transcript variant 2, mRNA.; Mus musculus hydroxyacyl-Coenzy…	chr5	coding
TC0500000376.mm.1	3.07979	2.47756	1.51806	0.0177108				NONMMUT051919; NONMMUT051920	NONCODE	Non-coding transcript identified by NONCODE: Sense No Exonic	chr5	ncrna
TC0500000449.mm.1	8.71247	8.096	1.53312	4.49358e-05	665839	Gm7816	predicted pseudogene 7816	ENSMUST00000058706; ENSMUST00000119884; OTTMUST00000062061	ENSEMBL; Havana transcript	predicted pseudogene 7816 ; predicted pseudogene 7816 [gene_biotype:processed_pseudogene transcript_biotype:processed_pseudogene]; DnaJ (Hsp40) homolog, subfamily A, member 1 (Dnaja1) pseudogene[gene_biotype:processed_pseudogene transcript_biotype:processed_pseudogene]	chr5	ncrna
TC0500000536.mm.1	4.46157	3.61452	1.79881	0.0178249	20531	Slc34a2	solute carrier family 34 (sodium phosphate), member 2; solute carrier family 34 (sodium phosphate), member 2	NM_011402; ENSMUST00000094787; ENSMUST00000147243; ENSMUST00000168667; ENSMUST00000170523; BC096369; NM_011402.3; OTTMUST00000064978; OTTMUST00000064979; OTTMUST00000094302; OTTMUST00000094303; uc008xla.2; uc008xlb.2	RefSeq; ENSEMBL; GenBank; MGI/Jackson Lab; Havana transcript; UCSC Genes	Mus musculus solute carrier family 34 (sodium phosphate), member 2 (Slc34a2), mRNA.; solute carrier family 34 (sodium phosphate), member 2 [gene_biotype:protein_coding transcript_biotype:protein_coding]; solute carrier family 34 (sodium phosphate), member 2 [gene_biotype:protein_coding transcript_biotype:retained_intron]; solute carrier family 34 (sodium phosphate), member 2 ; Mus musculus solute…	chr5	coding
TC0500000819.mm.1	7.85358	7.22481	1.54624	0.00500488	54403	Slc4a4	solute carrier family 4 (anion exchanger), member 4; Synthetic construct Mus musculus clone IMAGE:100068154, MGC:195771 solute carrier family 4 (anion exchanger), member 4 (Slc4a4) mRNA, encodes complete protein.; solute carrier family 4 (anion exchanger), member 4	NM_001136260; NM_001197147; NM_018760; ENSMUST00000113216; ENSMUST00000113218; ENSMUST00000130041; ENSMUST00000134303; ENSMUST00000135283; ENSMUST00000144713; ENSMUST00000148750; ENSMUST00000156238; BC148292; BC167254; NM_001136260.1; NM_001197147.1; NM_018760.2; OTTMUST00000063776; OTTMUST00000063777; OTTMUST00000063778; OTTMUST00000063779; OTTMUST00000063780; OTTMUST00000063781; OTTMUST00000081…	RefSeq; ENSEMBL; GenBank; MGI/Jackson Lab; Havana transcript; NONCODE; UCSC Genes	Mus musculus solute carrier family 4 (anion exchanger), member 4 (Slc4a4), transcript variant 2, mRNA.; Mus musculus solute carrier family 4 (anion exchanger), member 4 (Slc4a4), transcript variant 3, mRNA.; Mus musculus solute carrier family 4 (anion exchanger), member 4 (Slc4a4), transcript variant 1, mRNA.; solute carrier family 4 (anion exchanger), member 4 [gene_biotype:protein_coding transc…	chr5	coding
TC0500000820.mm.1	5.04557	2.93673	4.31344	0.0269669				NONMMUT053023	NONCODE	Non-coding transcript identified by NONCODE: Sense No Exonic	chr5	ncrna
TC0500000822.mm.1	5.72232	4.16738	2.93821	0.0185444				NONMMUT053025	NONCODE	Non-coding transcript identified by NONCODE: Sense No Exonic	chr5	ncrna
TC0500000876.mm.1	4.19327	4.8005	-1.52334	0.000547571	384198	Fam47e	family with sequence similarity 47, member E; family with sequence similarity 47, member E	NM_001033478; NM_001170571; ENSMUST00000082382; ENSMUST00000131166; ENSMUST00000146417; ENSMUST00000149617; ENSMUST00000175974; ENSMUST00000176448; ENSMUST00000176621; BC147167; BC147168; NM_001033478.2; NM_001170571.1; OTTMUST00000082505; OTTMUST00000082508; OTTMUST00000082509; OTTMUST00000104246; OTTMUST00000104247; OTTMUST00000104248; OTTMUST00000104249; uc008ydn.2; uc012dys.1; uc012dyt.1	RefSeq; ENSEMBL; GenBank; MGI/Jackson Lab; Havana transcript; UCSC Genes	Mus musculus family with sequence similarity 47, member E (Fam47e), transcript variant 1, mRNA.; Mus musculus family with sequence similarity 47, member E (Fam47e), transcript variant 2, mRNA.; family with sequence similarity 47, member E [gene_biotype:protein_coding transcript_biotype:protein_coding]; family with sequence similarity 47, member E [gene_biotype:protein_coding transcript_biotype:no…	chr5	coding
TC0500000896.mm.1	5.47004	4.88352	1.50162	0.010051	12452	Ccng2	cyclin G2; cyclin G2	NM_007635; ENSMUST00000031331; ENSMUST00000121127; ENSMUST00000130183; ENSMUST00000149329; ENSMUST00000152097; ENSMUST00000153260; BC088980; NM_007635.4; OTTMUST00000065855; OTTMUST00000065856; OTTMUST00000065857; OTTMUST00000065858; OTTMUST00000065859; OTTMUST00000065860; NONMMUT053154; NONMMUT053155; uc008yee.2; uc008yef.2	RefSeq; ENSEMBL; GenBank; MGI/Jackson Lab; Havana transcript; NONCODE; UCSC Genes	Mus musculus cyclin G2 (Ccng2), mRNA.; cyclin G2 [gene_biotype:protein_coding transcript_biotype:protein_coding]; cyclin G2 [gene_biotype:protein_coding transcript_biotype:retained_intron]; cyclin G2 [gene_biotype:protein_coding transcript_biotype:processed_transcript]; Mus musculus cyclin G2, mRNA (cDNA clone MGC:113793 IMAGE:5686564), complete cds.; cyclin G2 ; cyclin G2[gene_biotype:protein_co…	chr5	coding
TC0500001002.mm.1	2.88848	1.9577	1.90631	0.0146889				NONMMUT053379	NONCODE	Non-coding transcript identified by NONCODE: Sense No Exonic	chr5	ncrna
TC0500001025.mm.1	6.00249	7.37303	-2.58567	0.0263611	20750	Spp1	secreted phosphoprotein 1; secreted phosphoprotein 1	NM_001204201; NM_001204202; NM_001204203; NM_001204233; NM_009263; ENSMUST00000031243; ENSMUST00000086833; ENSMUST00000112746; ENSMUST00000112747; ENSMUST00000112748; ENSMUST00000132457; ENSMUST00000145084; BC002113; BC057858; BC080720; NM_001204201.1; NM_001204202.1; NM_001204203.1; NM_001204233.1; NM_009263.3; OTTMUST00000059773; OTTMUST00000059774; OTTMUST00000059775; OTTMUST00000059776; OTTMU…	RefSeq; ENSEMBL; GenBank; MGI/Jackson Lab; Havana transcript; NONCODE; UCSC Genes	Mus musculus secreted phosphoprotein 1 (Spp1), transcript variant 1, mRNA.; Mus musculus secreted phosphoprotein 1 (Spp1), transcript variant 2, mRNA.; Mus musculus secreted phosphoprotein 1 (Spp1), transcript variant 3, mRNA.; Mus musculus secreted phosphoprotein 1 (Spp1), transcript variant 5, mRNA.; Mus musculus secreted phosphoprotein 1 (Spp1), transcript variant 4, mRNA.; secreted phosphopro…	chr5	coding
TC0500001322.mm.1	5.30486	6.23701	-1.90811	0.0128922		n-R5s175	nuclear encoded rRNA 5S 175 [Source:MGI Symbol;Acc:MGI:4422040]	ENSMUST00000122599	ENSEMBL	nuclear encoded rRNA 5S 175 [gene_biotype:rRNA transcript_biotype:rRNA]	chr5	ncrna
TC0500001331.mm.1	6.24257	7.25821	-2.0218	0.0245961		n-R5s176	nuclear encoded rRNA 5S 176 [Source:MGI Symbol;Acc:MGI:4422041]	ENSMUST00000082683	ENSEMBL	nuclear encoded rRNA 5S 176 [gene_biotype:rRNA transcript_biotype:rRNA]	chr5	ncrna
TC0500001354.mm.1	7.84593	8.43599	-1.50531	0.01485		Gm26205	predicted gene, 26205 [Source:MGI Symbol;Acc:MGI:5455982]	ENSMUST00000082907	ENSEMBL	predicted gene, 26205 [gene_biotype:snoRNA transcript_biotype:snoRNA]	chr5	ncrna
TC0500001657.mm.1	2.28255	1.68732	1.51071	0.0392914				NONMMUT054990	NONCODE	Non-coding transcript identified by NONCODE: Linc	chr5	ncrna
TC0500001723.mm.1	7.58544	8.22943	-1.56265	0.0213221				NONMMUT055120	NONCODE	Non-coding transcript identified by NONCODE: Antisense	chr5	ncrna
TC0500001894.mm.1	5.52175	6.82278	-2.46406	0.00328032	13121	Cyp51	cytochrome P450, family 51; cytochrome P450, family 51	NM_020010; ENSMUST00000001507; ENSMUST00000129448; ENSMUST00000151539; BC031813; NM_020010.2; OTTMUST00000054505; OTTMUST00000054506; OTTMUST00000054507; uc008wie.1	RefSeq; ENSEMBL; GenBank; MGI/Jackson Lab; Havana transcript; UCSC Genes	Mus musculus cytochrome P450, family 51 (Cyp51), mRNA.; cytochrome P450, family 51 [gene_biotype:protein_coding transcript_biotype:protein_coding]; cytochrome P450, family 51 [gene_biotype:protein_coding transcript_biotype:processed_transcript]; cytochrome P450, family 51 [gene_biotype:protein_coding transcript_biotype:retained_intron]; Mus musculus cytochrome P450, family 51, mRNA (cDNA clone MG…	chr5	coding
TC0500001915.mm.1	11.1775	10.3395	1.78753	0.000606087	727711	Gm15459	predicted gene 15459	ENSMUST00000167402; ENSMUST00000117405; OTTMUST00000052939; uc008wjc.1; uc008wjd.1; uc008wje.1	ENSEMBL; Havana transcript; UCSC Genes	predicted gene 15459 ; predicted gene 15459 [gene_biotype:processed_pseudogene transcript_biotype:processed_pseudogene]; heat shock protein pseudogene[gene_biotype:processed_pseudogene transcript_biotype:processed_pseudogene]; Mus musculus cDNA, clone:Y2G0128N17, strand:plus, reference:ENSEMBL:Mouse-Transcript-ENST:ENSMUST00000070823, based on BLAT search.; Mus musculus cDNA, clone:Y2G0150H23, st…	chr5	ncrna
TC0500001936.mm.1	10.291	9.38367	1.87563	0.000840794	74114	Crot	carnitine O-octanoyltransferase; carnitine O-octanoyltransferase	NM_023733; ENSMUST00000003720; ENSMUST00000146115; ENSMUST00000157024; BC006593; BC012308; NM_023733.3; OTTMUST00000059513; OTTMUST00000059514; OTTMUST00000059515; ENSMUST00000183418; uc008wkt.1; uc008wku.1	RefSeq; ENSEMBL; GenBank; MGI/Jackson Lab; Havana transcript; UCSC Genes	Mus musculus carnitine O-octanoyltransferase (Crot), mRNA.; carnitine O-octanoyltransferase [gene_biotype:protein_coding transcript_biotype:protein_coding]; carnitine O-octanoyltransferase [gene_biotype:protein_coding transcript_biotype:processed_transcript]; carnitine O-octanoyltransferase [gene_biotype:protein_coding transcript_biotype:retained_intron]; Mus musculus carnitine O-octanoyltransfer…	chr5	coding
TC0500001992.mm.1	6.81055	5.44999	2.56785	0.00632914	12491	Cd36	CD36 antigen; CD36 antigen	NM_001159555; NM_001159556; NM_001159557; NM_001159558; NM_007643; ENSMUST00000082367; ENSMUST00000165232; ENSMUST00000169095; ENSMUST00000170051; BC010262; NM_001159555.1; NM_001159556.1; NM_001159557.1; NM_001159558.1; NM_007643.4; NONMMUT051325; uc008wnn.2; uc008wno.2; uc008wnp.2; uc008wnq.2; uc012dsl.1	RefSeq; ENSEMBL; GenBank; MGI/Jackson Lab; NONCODE; UCSC Genes	Mus musculus CD36 antigen (Cd36), transcript variant 3, mRNA.; Mus musculus CD36 antigen (Cd36), transcript variant 5, mRNA.; Mus musculus CD36 antigen (Cd36), transcript variant 4, mRNA.; Mus musculus CD36 antigen (Cd36), transcript variant 1, mRNA.; Mus musculus CD36 antigen (Cd36), transcript variant 2, mRNA.; CD36 antigen [gene_biotype:protein_coding transcript_biotype:protein_coding]; Mus mu…	chr5	coding
TC0500002035.mm.1	2.41581	3.14617	-1.65905	0.0123321		n-R5s170	nuclear encoded rRNA 5S 170 [Source:MGI Symbol;Acc:MGI:4422035]	ENSMUST00000083726	ENSEMBL	nuclear encoded rRNA 5S 170 [gene_biotype:rRNA transcript_biotype:rRNA]	chr5	ncrna
TC0500002154.mm.1	9.18528	8.55867	1.54394	0.000306471	97212	Hadha	hydroxyacyl-Coenzyme A dehydrogenase/3-ketoacyl-Coenzyme A thiolase/enoyl-Coenzyme A hydratase (trifunctional protein), alpha subunit; hydroxyacyl-Coenzyme A dehydrogenase/3-ketoacyl-Coenzyme A thiolase/enoyl-Coenzyme A hydratase (trifunctional protein), alpha subunit	NM_178878; ENSMUST00000026843; ENSMUST00000126081; ENSMUST00000130358; ENSMUST00000132486; ENSMUST00000156859; BC037009; BC046978; BC058569; NM_178878.2; OTTMUST00000060908; OTTMUST00000060909; OTTMUST00000060910; OTTMUST00000060911; OTTMUST00000060912; NONMMUT051699; NONMMUT051700; uc008wvc.1; uc008wvd.1	RefSeq; ENSEMBL; GenBank; MGI/Jackson Lab; Havana transcript; NONCODE; UCSC Genes	Mus musculus hydroxyacyl-Coenzyme A dehydrogenase/3-ketoacyl-Coenzyme A thiolase/enoyl-Coenzyme A hydratase (trifunctional protein), alpha subunit (Hadha), mRNA.; hydroxyacyl-Coenzyme A dehydrogenase/3-ketoacyl-Coenzyme A thiolase/enoyl-Coenzyme A hydratase (trifunctional protein), alpha subunit [gene_biotype:protein_coding transcript_biotype:processed_transcript]; hydroxyacyl-Coenzyme A dehydrog…	chr5	coding
TC0500002213.mm.1	5.78781	4.76261	2.03525	0.0307004	100689	Spon2	spondin 2, extracellular matrix protein; spondin 2, extracellular matrix protein ; spondin 2, extracellular matrix protein (Spon2), mRNA.	NM_133903; ENSMUST00000046186; BC017616; NM_133903.3; uc029vgz.1; uc008xai.2	RefSeq; ENSEMBL; GenBank; MGI/Jackson Lab; UCSC Genes	Mus musculus spondin 2, extracellular matrix protein (Spon2), mRNA.; spondin 2, extracellular matrix protein [gene_biotype:protein_coding transcript_biotype:protein_coding]; Mus musculus spondin 2, extracellular matrix protein, mRNA (cDNA clone MGC:27697 IMAGE:4923292), complete cds.; spondin 2, extracellular matrix protein ; spondin 2, extracellular matrix protein (Spon2), mRNA.	chr5	coding
TC0500002417.mm.1	5.55339	4.91726	1.55416	0.014259	75954	5033403H07Rik	RIKEN cDNA 5033403H07 gene; RIKEN cDNA 5033403H07 gene (5033403H07Rik), non-coding RNA.	NR_040413; NR_040413.1; KnowTID_00005848; KnowTID_00005849; NONMMUT052310; NONMMUT052311; NONMMUT052312; uc029vhl.1	RefSeq; MGI/Jackson Lab; Luo lincRNA; NONCODE; UCSC Genes	Mus musculus RIKEN cDNA 5033403H07 gene (5033403H07Rik), long non-coding RNA.; RIKEN cDNA 5033403H07 gene (5033403H07Rik), non-coding RNA.; Non-coding transcript identified by Luo, et al.; Non-coding transcript identified by NONCODE: Linc	chr5	ncrna
TC0500002444.mm.1	7.37345	6.50632	1.82403	0.0189933				uc029vhv.1	UCSC Genes	Mus musculus non-coding RNA, oocyte_piRNA1665, complete sequence.	chr5	ncrna
TC0500002628.mm.1	7.84003	7.01121	1.77624	0.000602631	12753	Clock	circadian locomotor output cycles kaput; Synthetic construct Mus musculus clone IMAGE:100062237, MGC:190424 circadian locomoter output cycles kaput (Clock) mRNA, encodes complete protein.; circadian locomotor output cycles kaput ; circadian locomotor output cycles kaput (Clock), mRNA.	NM_001289826; NM_007715; ENSMUST00000075159; BC156741; NM_007715.5; uc008xuq.1; uc008xur.1; uc008xus.1; uc008xut.1; uc012dxl.1	RefSeq; ENSEMBL; GenBank; MGI/Jackson Lab; UCSC Genes	Mus musculus circadian locomotor output cycles kaput (Clock), transcript variant 2, mRNA.; Mus musculus circadian locomotor output cycles kaput (Clock), transcript variant 1, mRNA.; circadian locomotor output cycles kaput [gene_biotype:protein_coding transcript_biotype:protein_coding]; Synthetic construct Mus musculus clone IMAGE:100062237, MGC:190424 circadian locomoter output cycles kaput (Cloc…	chr5	coding
TC0500002629.mm.1	5.84969	4.51469	2.52275	0.00137141				NONMMUT052836	NONCODE	Non-coding transcript identified by NONCODE: Sense No Exonic	chr5	ncrna
TC0500002661.mm.1	8.3402	7.48466	1.80944	0.0192827		Gm2199	predicted gene 2199 [Source:MGI Symbol;Acc:MGI:3780369]	ENSMUST00000119065; NONMMUT052900; OTTMUST00000072153	ENSEMBL; NONCODE; Havana transcript	predicted gene 2199 [gene_biotype:processed_pseudogene transcript_biotype:processed_pseudogene]; Non-coding transcript identified by NONCODE: Linc; mitochondrial carrier homolog 2 (C. elegans) (Mtch2) pseudogene[gene_biotype:processed_pseudogene transcript_biotype:processed_pseudogene]	chr5	ncrna
TC0500002690.mm.1	9.7169	8.95185	1.69942	0.0412316	71773	Ugt2b1	UDP glucuronosyltransferase 2 family, polypeptide B1; UDP glucuronosyltransferase 2 family, polypeptide B1	NM_152811; ENSMUST00000031183; BC027200; NM_152811.1; OTTMUST00000066215; uc008xyc.1	RefSeq; ENSEMBL; GenBank; MGI/Jackson Lab; Havana transcript; UCSC Genes	Mus musculus UDP glucuronosyltransferase 2 family, polypeptide B1 (Ugt2b1), mRNA.; UDP glucuronosyltransferase 2 family, polypeptide B1 [gene_biotype:protein_coding transcript_biotype:protein_coding]; Mus musculus UDP glucuronosyltransferase 2 family, polypeptide B1, mRNA (cDNA clone MGC:28464 IMAGE:4161686), complete cds.; UDP glucuronosyltransferase 2 family, polypeptide B1 ; UDP glucuronosyltr…	chr5	coding
TC0500002695.mm.1	9.29447	8.47597	1.76358	0.0229191	72094	Ugt2a3	UDP glucuronosyltransferase 2 family, polypeptide A3; UDP glucuronosyltransferase 2 family, polypeptide A3	NM_028094; ENSMUST00000031195; BC025795; NM_028094.3; OTTMUST00000066255; uc008xyh.2	RefSeq; ENSEMBL; GenBank; MGI/Jackson Lab; Havana transcript; UCSC Genes	Mus musculus UDP glucuronosyltransferase 2 family, polypeptide A3 (Ugt2a3), mRNA.; UDP glucuronosyltransferase 2 family, polypeptide A3 [gene_biotype:protein_coding transcript_biotype:protein_coding]; Mus musculus UDP glucuronosyltransferase 2 family, polypeptide A3, mRNA (cDNA clone MGC:35622 IMAGE:5133743), complete cds.; UDP glucuronosyltransferase 2 family, polypeptide A3 ; UDP glucuronosyltr…	chr5	coding
TC0500002770.mm.1	7.56191	6.9762	1.50077	0.0261572	12453	Ccni	cyclin I; cyclin I	NM_017367; ENSMUST00000058550; ENSMUST00000123033; ENSMUST00000144514; ENSMUST00000151568; BC003290; NM_017367.3; OTTMUST00000065863; OTTMUST00000065864; OTTMUST00000065865; OTTMUST00000065866; NONMMUT053148; uc008yed.2	RefSeq; ENSEMBL; GenBank; MGI/Jackson Lab; Havana transcript; NONCODE; UCSC Genes	Mus musculus cyclin I (Ccni), mRNA.; cyclin I [gene_biotype:protein_coding transcript_biotype:protein_coding]; cyclin I [gene_biotype:protein_coding transcript_biotype:retained_intron]; Mus musculus cyclin I, mRNA (cDNA clone MGC:5636 IMAGE:3583418), complete cds.; cyclin I ; cyclin I[gene_biotype:protein_coding transcript_biotype:protein_coding]; cyclin I[gene_biotype:protein_coding transcript_b…	chr5	coding
TC0500002815.mm.1	6.89182	6.23083	1.58117	0.010362	100041680	Gm3470	predicted gene 3470	XM_001477422.2; ENSMUST00000160819; OTTMUST00000083839	MGI/Jackson Lab; ENSEMBL; Havana transcript	predicted gene 3470 ; predicted gene 3470 [gene_biotype:processed_pseudogene transcript_biotype:processed_pseudogene]; RNA binding protein with multiple splicing 2 (Rbpms2) pseudogene[gene_biotype:processed_pseudogene transcript_biotype:processed_pseudogene]	chr5	ncrna
TC0500002881.mm.1	10.3838	9.30392	2.11392	0.000255374	243168	Hsd17b13	hydroxysteroid (17-beta) dehydrogenase 13; hydroxysteroid (17-beta) dehydrogenase 13	NM_001163486; NM_198030; ENSMUST00000048118; ENSMUST00000112803; ENSMUST00000120320; BC019427; NM_001163486.1; NM_198030.2; OTTMUST00000066306; OTTMUST00000066307; OTTMUST00000066308; NONMMUT053416; uc008yjw.2; uc008yjx.2	RefSeq; ENSEMBL; GenBank; MGI/Jackson Lab; Havana transcript; NONCODE; UCSC Genes	Mus musculus hydroxysteroid (17-beta) dehydrogenase 13 (Hsd17b13), transcript variant 1, mRNA.; Mus musculus hydroxysteroid (17-beta) dehydrogenase 13 (Hsd17b13), transcript variant 2, mRNA.; hydroxysteroid (17-beta) dehydrogenase 13 [gene_biotype:protein_coding transcript_biotype:protein_coding]; Mus musculus hydroxysteroid (17-beta) dehydrogenase 13, mRNA (cDNA clone MGC:30360 IMAGE:5132342), c…	chr5	coding
TC0500002882.mm.1	7.96517	6.81527	2.21898	0.00142	114664	Hsd17b11	hydroxysteroid (17-beta) dehydrogenase 11; hydroxysteroid (17-beta) dehydrogenase 11	NM_053262; ENSMUST00000031251; ENSMUST00000119025; BC038340; NM_053262.3; OTTMUST00000066228; OTTMUST00000066229; NONMMUT053418; uc008yjy.1; uc008yjz.1	RefSeq; ENSEMBL; GenBank; MGI/Jackson Lab; Havana transcript; NONCODE; UCSC Genes	Mus musculus hydroxysteroid (17-beta) dehydrogenase 11 (Hsd17b11), mRNA.; hydroxysteroid (17-beta) dehydrogenase 11 [gene_biotype:protein_coding transcript_biotype:protein_coding]; Mus musculus hydroxysteroid (17-beta) dehydrogenase 11, mRNA (cDNA clone MGC:28723 IMAGE:4458725), complete cds.; hydroxysteroid (17-beta) dehydrogenase 11 ; hydroxysteroid (17-beta) dehydrogenase 11[gene_biotype:prote…	chr5	coding
TC0500002935.mm.1	4.55234	3.90197	1.56956	0.0282756				NONMMUT053601	NONCODE	Non-coding transcript identified by NONCODE: Sense No Exonic	chr5	ncrna
TC0500002940.mm.1	5.98347	5.34837	1.55305	0.0019467	73130	Tmed5	transmembrane emp24 protein transport domain containing 5; transmembrane emp24 protein transport domain containing 5	NM_028876; ENSMUST00000002837; ENSMUST00000061203; ENSMUST00000117759; ENSMUST00000118036; ENSMUST00000119437; ENSMUST00000119784; BC020076; BC132023; BC138226; NM_028876.2; OTTMUST00000071669; OTTMUST00000071670; OTTMUST00000071671; OTTMUST00000071672; OTTMUST00000071673; OTTMUST00000071674; NONMMUT053627; NONMMUT053628; NONMMUT053629; NONMMUT053630; uc008ynp.1; uc008ynq.2	RefSeq; ENSEMBL; GenBank; MGI/Jackson Lab; Havana transcript; NONCODE; UCSC Genes	Mus musculus transmembrane emp24 protein transport domain containing 5 (Tmed5), mRNA.; transmembrane emp24 protein transport domain containing 5 [gene_biotype:protein_coding transcript_biotype:protein_coding]; Mus musculus transmembrane emp24 protein transport domain containing 5, mRNA (cDNA clone MGC:28168 IMAGE:3985782), complete cds.; Mus musculus transmembrane emp24 protein transport domain c…	chr5	coding
TC0500003096.mm.1	6.75135	6.09213	1.57923	0.00814744	384281	Gatc	glutamyl-tRNA(Gln) amidotransferase, subunit C; glutamyl-tRNA(Gln) amidotransferase, subunit C homolog (bacterial)	NM_029645; ENSMUST00000139167; BC021775; NM_029645.3; OTTMUST00000034760; NONMMUT054052; uc008zdr.1	RefSeq; ENSEMBL; GenBank; MGI/Jackson Lab; Havana transcript; NONCODE; UCSC Genes	Mus musculus glutamyl-tRNA(Gln) amidotransferase, subunit C (Gatc), mRNA.; glutamyl-tRNA(Gln) amidotransferase, subunit C [gene_biotype:protein_coding transcript_biotype:protein_coding]; Mus musculus glutamyl-tRNA(Gln) amidotransferase, subunit C homolog (bacterial), mRNA (cDNA clone MGC:28449 IMAGE:4158979), complete cds.; glutamyl-tRNA(Gln) amidotransferase, subunit C homolog (bacterial) ; glut…	chr5	coding
TC0500003212.mm.1	8.22712	7.29229	1.91167	0.00039089	11938	Atp2a2	ATPase, Ca++ transporting, cardiac muscle, slow twitch 2; ATPase, Ca++ transporting, cardiac muscle, slow twitch 2	NM_001110140; NM_009722; NR_027838; ENSMUST00000031423; ENSMUST00000177974; ENSMUST00000179939; BC054531; BC054748; NM_001110140.3; NM_009722.3; NR_027838.1; NONMMUT054360; NONMMUT054364; uc008zli.2; uc008zlj.2	RefSeq; ENSEMBL; GenBank; MGI/Jackson Lab; NONCODE; UCSC Genes	Mus musculus ATPase, Ca++ transporting, cardiac muscle, slow twitch 2 (Atp2a2), transcript variant 1, mRNA.; Mus musculus ATPase, Ca++ transporting, cardiac muscle, slow twitch 2 (Atp2a2), transcript variant 2, mRNA.; Mus musculus ATPase, Ca++ transporting, cardiac muscle, slow twitch 2 (Atp2a2), transcript variant 3, non-coding RNA.; ATPase, Ca++ transporting, cardiac muscle, slow twitch 2 [gene…	chr5	coding
TC0500003213.mm.1	5.5253	3.97953	2.91961	0.00182763				NONMMUT054361	NONCODE	Non-coding transcript identified by NONCODE: Sense No Exonic	chr5	ncrna
TC0500003214.mm.1	6.36529	5.00673	2.56429	0.0072958				NONMMUT054362	NONCODE	Non-coding transcript identified by NONCODE: Sense No Exonic	chr5	ncrna
TC0500003217.mm.1	3.30686	4.01551	-1.63427	0.0147861				NONMMUT054373	NONCODE	Non-coding transcript identified by NONCODE: Antisense	chr5	ncrna
TC0500003314.mm.1	9.18427	8.56356	1.53763	0.0277105	109900	Asl	argininosuccinate lyase; argininosuccinate lyase	NM_133768; ENSMUST00000159096; ENSMUST00000159619; ENSMUST00000160129; ENSMUST00000160208; ENSMUST00000160557; ENSMUST00000161094; ENSMUST00000161640; ENSMUST00000161884; ENSMUST00000162230; BC016670; NM_133768.4; OTTMUST00000085071; OTTMUST00000085072; OTTMUST00000085369; OTTMUST00000085370; OTTMUST00000085413; OTTMUST00000085414; OTTMUST00000085475; OTTMUST00000085476; OTTMUST00000085581; NONMM…	RefSeq; ENSEMBL; GenBank; MGI/Jackson Lab; Havana transcript; NONCODE; UCSC Genes	Mus musculus argininosuccinate lyase (Asl), mRNA.; argininosuccinate lyase [gene_biotype:protein_coding transcript_biotype:protein_coding]; argininosuccinate lyase ; argininosuccinate lyase [gene_biotype:protein_coding transcript_biotype:processed_transcript]; argininosuccinate lyase [gene_biotype:protein_coding transcript_biotype:retained_intron]; Mus musculus argininosuccinate lyase, mRNA (cDNA…	chr5	coding
TC0500003495.mm.1	6.05487	5.45387	1.51676	0.00177595	100494	Zfand2a	zinc finger, AN1-type domain 2A; zinc finger, AN1-type domain 2A	NM_001159908; NM_133349; ENSMUST00000079996; ENSMUST00000110851; ENSMUST00000132454; ENSMUST00000143889; ENSMUST00000150992; BC058780; NM_001159908.1; NM_133349.3; OTTMUST00000055590; OTTMUST00000055591; OTTMUST00000055592; OTTMUST00000055593; OTTMUST00000055594; NONMMUT055032; NONMMUT055033; uc009ags.2; uc009agt.2	RefSeq; ENSEMBL; GenBank; MGI/Jackson Lab; Havana transcript; NONCODE; UCSC Genes	Mus musculus zinc finger, AN1-type domain 2A (Zfand2a), transcript variant 2, mRNA.; Mus musculus zinc finger, AN1-type domain 2A (Zfand2a), transcript variant 1, mRNA.; zinc finger, AN1-type domain 2A [gene_biotype:protein_coding transcript_biotype:protein_coding]; zinc finger, AN1-type domain 2A [gene_biotype:protein_coding transcript_biotype:processed_transcript]; Mus musculus zinc finger, AN1…	chr5	coding
TC0500003532.mm.1	4.64061	5.48721	-1.79826	0.0388628	75104	Mmd2	monocyte to macrophage differentiation-associated 2; monocyte to macrophage differentiation-associated 2	NM_175217; ENSMUST00000037048; BC025064; NM_175217.6; NONMMUT055109; uc009aix.1	RefSeq; ENSEMBL; GenBank; MGI/Jackson Lab; NONCODE; UCSC Genes	Mus musculus monocyte to macrophage differentiation-associated 2 (Mmd2), mRNA.; monocyte to macrophage differentiation-associated 2 [gene_biotype:protein_coding transcript_biotype:protein_coding]; Mus musculus monocyte to macrophage differentiation-associated 2, mRNA (cDNA clone MGC:36872 IMAGE:4502289), complete cds.; monocyte to macrophage differentiation-associated 2 ; Non-coding transcript id…	chr5	coding
TC0500003576.mm.1	7.36504	6.58786	1.71378	0.000416975	66898	Baiap2l1	BAI1-associated protein 2-like 1; BAI1-associated protein 2-like 1	NM_025833; ENSMUST00000055190; ENSMUST00000129287; BC015459; NM_025833.3; OTTMUST00000062939; OTTMUST00000062941; uc009alq.1	RefSeq; ENSEMBL; GenBank; MGI/Jackson Lab; Havana transcript; UCSC Genes	Mus musculus BAI1-associated protein 2-like 1 (Baiap2l1), mRNA.; BAI1-associated protein 2-like 1 [gene_biotype:protein_coding transcript_biotype:protein_coding]; BAI1-associated protein 2-like 1 [gene_biotype:protein_coding transcript_biotype:processed_transcript]; Mus musculus BAI1-associated protein 2-like 1, mRNA (cDNA clone MGC:8269 IMAGE:3592632), complete cds.; BAI1-associated protein 2-li…	chr5	coding
TC0500003596.mm.1	5.50267	4.59446	1.87671	0.00133621	13114	Cyp3a16	cytochrome P450, family 3, subfamily a, polypeptide 16; cytochrome P450, family 3, subfamily a, polypeptide 16	NM_007820; ENSMUST00000031633; BC113143; NM_007820.2; OTTMUST00000061807; uc009amv.2	RefSeq; ENSEMBL; GenBank; MGI/Jackson Lab; Havana transcript; UCSC Genes	Mus musculus cytochrome P450, family 3, subfamily a, polypeptide 16 (Cyp3a16), mRNA.; cytochrome P450, family 3, subfamily a, polypeptide 16 [gene_biotype:protein_coding transcript_biotype:protein_coding]; Mus musculus cytochrome P450, family 3, subfamily a, polypeptide 16, mRNA (cDNA clone MGC:130513 IMAGE:40047455), complete cds.; cytochrome P450, family 3, subfamily a, polypeptide 16 ; cytochr…	chr5	coding
TC0500003744.mm.1	8.08597	7.10101	1.97926	0.000556416	100041375; 53973	Cyp3a41b; Cyp3a41a	cytochrome P450, family 3, subfamily a, polypeptide 41B; cytochrome P450, family 3, subfamily a, polypeptide 41A (Cyp3a41a), mRNA.; cytochrome P450, family 3, subfamily a, polypeptide 41B	NM_001105159; NM_017396_2; ENSMUST00000075837; BC138083; BC138084; NM_001105159.1	RefSeq; ENSEMBL; GenBank; MGI/Jackson Lab	Mus musculus cytochrome P450, family 3, subfamily a, polypeptide 41B (Cyp3a41b), mRNA.; cytochrome P450, family 3, subfamily a, polypeptide 41A (Cyp3a41a), mRNA.; cytochrome P450, family 3, subfamily a, polypeptide 41B [gene_biotype:protein_coding transcript_biotype:protein_coding]; Mus musculus cytochrome P450, family 3, subfamily a, polypeptide 41B, mRNA (cDNA clone MGC:169707 IMAGE:8861102), c…	chr5	coding
TC0500003745.mm.1	8.15525	7.18335	1.96143	0.000788957	53973; 100041375	Cyp3a41a; Cyp3a41b	cytochrome P450, family 3, subfamily a, polypeptide 41A; cytochrome P450, family 3, subfamily a, polypeptide 41B, mRNA (cDNA clone MGC:169707 IMAGE:8861102), complete cds.; cytochrome P450, family 3, subfamily a, polypeptide 41B, mRNA (cDNA clone MGC:169708 IMAGE:8861103), complete cds.; cytochrome P450, family 3, subfamily a, polypeptide 41A	NM_017396; ENSMUST00000094111; BC138083_2; BC138084_2; NM_017396.3	RefSeq; ENSEMBL; GenBank; MGI/Jackson Lab	Mus musculus cytochrome P450, family 3, subfamily a, polypeptide 41A (Cyp3a41a), mRNA.; cytochrome P450, family 3, subfamily a, polypeptide 41A [gene_biotype:protein_coding transcript_biotype:protein_coding]; cytochrome P450, family 3, subfamily a, polypeptide 41B, mRNA (cDNA clone MGC:169707 IMAGE:8861102), complete cds.; cytochrome P450, family 3, subfamily a, polypeptide 41B, mRNA (cDNA clone …	chr5	coding
TC0500003599.mm.1	7.72484	6.73194	1.99018	0.000357508	337924	Cyp3a44	cytochrome P450, family 3, subfamily a, polypeptide 44; cytochrome P450, family 3, subfamily a, polypeptide 44	NM_177380; ENSMUST00000067479; BC125522; NM_177380.3; OTTMUST00000061808; uc009amx.1	RefSeq; ENSEMBL; GenBank; MGI/Jackson Lab; Havana transcript; UCSC Genes	Mus musculus cytochrome P450, family 3, subfamily a, polypeptide 44 (Cyp3a44), mRNA.; cytochrome P450, family 3, subfamily a, polypeptide 44 [gene_biotype:protein_coding transcript_biotype:protein_coding]; Mus musculus cytochrome P450, family 3, subfamily a, polypeptide 44, mRNA (cDNA clone MGC:159225 IMAGE:40130037), complete cds.; cytochrome P450, family 3, subfamily a, polypeptide 44 ; cytochr…	chr5	coding
TC0500003600.mm.1	11.18	10.0508	2.18741	0.000111938	13112	Cyp3a11	cytochrome P450, family 3, subfamily a, polypeptide 11; cytochrome P450, family 3, subfamily a, polypeptide 11	NM_007818; ENSMUST00000035918; BC010528; BC094062; NM_007818.3; OTTMUST00000064371; NONMMUT055246; uc009amy.1	RefSeq; ENSEMBL; GenBank; MGI/Jackson Lab; Havana transcript; NONCODE; UCSC Genes	Mus musculus cytochrome P450, family 3, subfamily a, polypeptide 11 (Cyp3a11), mRNA.; cytochrome P450, family 3, subfamily a, polypeptide 11 [gene_biotype:protein_coding transcript_biotype:protein_coding]; Mus musculus cytochrome P450, family 3, subfamily a, polypeptide 11, mRNA (cDNA clone MGC:18636 IMAGE:4194909), complete cds.; Mus musculus cytochrome P450, family 3, subfamily a, polypeptide 1…	chr5	coding
TC0500003619.mm.1	6.33251	5.66414	1.58928	0.00121823	140887	Lnx2	ligand of numb-protein X 2; ligand of numb-protein X 2	NM_080795; ENSMUST00000016664; ENSMUST00000123092; BC090665; BC117937; BC117938; NM_080795.4; OTTMUST00000060540; OTTMUST00000060541; NONMMUT055295; uc009ant.2	RefSeq; ENSEMBL; GenBank; MGI/Jackson Lab; Havana transcript; NONCODE; UCSC Genes	Mus musculus ligand of numb-protein X 2 (Lnx2), mRNA.; ligand of numb-protein X 2 [gene_biotype:protein_coding transcript_biotype:protein_coding]; ligand of numb-protein X 2 [gene_biotype:protein_coding transcript_biotype:processed_transcript]; Mus musculus ligand of numb-protein X 2, mRNA (cDNA clone MGC:115947 IMAGE:30686384), complete cds.; Mus musculus ligand of numb-protein X 2, mRNA (cDNA c…	chr5	coding
TC0500003655.mm.1	4.84794	5.55003	-1.62686	0.037434		n-R5s180	nuclear encoded rRNA 5S 180 [Source:MGI Symbol;Acc:MGI:4422045]	ENSMUST00000082770	ENSEMBL	nuclear encoded rRNA 5S 180 [gene_biotype:rRNA transcript_biotype:rRNA]	chr5	ncrna
TC0500003660.mm.1	6.84032	5.91006	1.90561	0.000897429	15505	Hsph1	heat shock 105kDa/110kDa protein 1; heat shock 105kDa/110kDa protein 1	NM_013559; ENSMUST00000074846; ENSMUST00000076410; ENSMUST00000110498; ENSMUST00000127977; ENSMUST00000132412; ENSMUST00000137534; BC018378; NM_013559.2; OTTMUST00000050668; OTTMUST00000050669; OTTMUST00000050670; OTTMUST00000050671; OTTMUST00000050672; OTTMUST00000050673; uc009apx.1; uc009apy.1; uc009apz.1; uc009aqa.1	RefSeq; ENSEMBL; GenBank; MGI/Jackson Lab; Havana transcript; UCSC Genes	Mus musculus heat shock 105kDa/110kDa protein 1 (Hsph1), mRNA.; heat shock 105kDa/110kDa protein 1 [gene_biotype:protein_coding transcript_biotype:protein_coding]; heat shock 105kDa/110kDa protein 1 ; Mus musculus heat shock 105kDa/110kDa protein 1, mRNA (cDNA clone MGC:6016 IMAGE:3257042), complete cds.; heat shock 105kDa/110kDa protein 1[gene_biotype:protein_coding transcript_biotype:protein_co…	chr5	coding
TC0500003697.mm.1	6.09176	5.43313	1.57859	0.0174412				NONMMUT055529	NONCODE	Non-coding transcript identified by NONCODE: Sense No Exonic	chr5	ncrna
TC0600000196.mm.1	6.93374	7.71691	-1.72091	0.0261027		Gm27959	predicted gene, 27959 [Source:MGI Symbol;Acc:MGI:5531341]	ENSMUST00000185172	ENSEMBL	predicted gene, 27959 [gene_biotype:rRNA transcript_biotype:rRNA]	chr6	ncrna
TC0600000199.mm.1	5.72697	4.98989	1.6668	0.0384927				uc012eip.2	UCSC Genes	Mus musculus non-coding RNA, oocyte_piRNA775, complete sequence.	chr6	ncrna
TC0600000639.mm.1	8.81786	9.58961	-1.70734	0.0315925		Gm25818	predicted gene, 25818 [Source:MGI Symbol;Acc:MGI:5455595]	ENSMUST00000083282	ENSEMBL	predicted gene, 25818 [gene_biotype:snRNA transcript_biotype:snRNA]	chr6	ncrna
TC0600000711.mm.1	6.50278	5.65181	1.80371	0.00152641	26357	Abcg2	ATP-binding cassette, sub-family G (WHITE), member 2; ATP-binding cassette, sub-family G (WHITE), member 2	NM_011920; ENSMUST00000031822; ENSMUST00000114294; ENSMUST00000124542; ENSMUST00000134426; ENSMUST00000143447; ENSMUST00000143752; ENSMUST00000145161; ENSMUST00000145685; ENSMUST00000147213; ENSMUST00000148008; BC053730; NM_011920.3; OTTMUST00000052779; OTTMUST00000052780; OTTMUST00000052781; OTTMUST00000052782; OTTMUST00000052783; OTTMUST00000052784; OTTMUST00000053403; OTTMUST00000053404; OTTMU…	RefSeq; ENSEMBL; GenBank; MGI/Jackson Lab; Havana transcript; NONCODE; UCSC Genes	Mus musculus ATP-binding cassette, sub-family G (WHITE), member 2 (Abcg2), mRNA.; ATP-binding cassette, sub-family G (WHITE), member 2 [gene_biotype:protein_coding transcript_biotype:protein_coding]; ATP-binding cassette, sub-family G (WHITE), member 2 [gene_biotype:protein_coding transcript_biotype:retained_intron]; ATP-binding cassette, sub-family G (WHITE), member 2 [gene_biotype:protein_codin…	chr6	coding
TC0600000713.mm.1	3.42668	2.67179	1.6875	0.00111694				NONMMUT057171	NONCODE	Non-coding transcript identified by NONCODE: Linc	chr6	ncrna
TC0600000722.mm.1	6.79645	7.56359	-1.70189	0.014975		n-R5s162	nuclear encoded rRNA 5S 162 [Source:MGI Symbol;Acc:MGI:4422026]	ENSMUST00000082581	ENSEMBL	nuclear encoded rRNA 5S 162 [gene_biotype:rRNA transcript_biotype:rRNA]	chr6	ncrna
TC0600000841.mm.1	9.76737	8.73761	2.04168	0.000344308	20454	St3gal5	ST3 beta-galactoside alpha-2,3-sialyltransferase 5; ST3 beta-galactoside alpha-2,3-sialyltransferase 5	NM_001035228; NM_011375; ENSMUST00000069994; ENSMUST00000114112; BC138557; BC138559; NM_001035228.1; NM_011375.2; uc009chy.1; uc009chz.1	RefSeq; ENSEMBL; GenBank; MGI/Jackson Lab; UCSC Genes	Mus musculus ST3 beta-galactoside alpha-2,3-sialyltransferase 5 (St3gal5), transcript variant 1, mRNA.; Mus musculus ST3 beta-galactoside alpha-2,3-sialyltransferase 5 (St3gal5), transcript variant 2, mRNA.; ST3 beta-galactoside alpha-2,3-sialyltransferase 5 [gene_biotype:protein_coding transcript_biotype:protein_coding]; Mus musculus ST3 beta-galactoside alpha-2,3-sialyltransferase 5, mRNA (cDNA…	chr6	coding
TC0600000854.mm.1	9.9272	7.63469	4.89906	9.08576e-05	67442	Retsat	retinol saturase (all trans retinol 13,14 reductase); retinol saturase (all trans retinol 13,14 reductase)	NM_026159; ENSMUST00000070597; ENSMUST00000129071; ENSMUST00000175824; ENSMUST00000176168; ENSMUST00000176364; BC117751; NM_026159.4; OTTMUST00000066600; OTTMUST00000066601; OTTMUST00000103852; OTTMUST00000103867; OTTMUST00000103868; uc009cix.1	RefSeq; ENSEMBL; GenBank; MGI/Jackson Lab; Havana transcript; UCSC Genes	Mus musculus retinol saturase (all trans retinol 13,14 reductase) (Retsat), mRNA.; retinol saturase (all trans retinol 13,14 reductase) [gene_biotype:protein_coding transcript_biotype:protein_coding]; retinol saturase (all trans retinol 13,14 reductase) [gene_biotype:protein_coding transcript_biotype:processed_transcript]; Mus musculus retinol saturase (all trans retinol 13,14 reductase), mRNA (c…	chr6	coding
TC0600000856.mm.1	4.44755	3.38937	2.0823	0.0181049	100038714	Gm15401	predicted gene 15401; predicted gene 15401	NR_040421; NR_040422; NR_040421.1; NR_040422.1; ENSMUST00000081929; ENSMUST00000101278; ENSMUST00000156497; NONMMUT057444; OTTMUST00000050220; OTTMUST00000050221; OTTMUST00000050222; uc029vwf.1; uc029vwg.1	RefSeq; MGI/Jackson Lab; ENSEMBL; NONCODE; Havana transcript; UCSC Genes	Mus musculus predicted gene 15401 (Gm15401), transcript variant 1, long non-coding RNA.; Mus musculus predicted gene 15401 (Gm15401), transcript variant 2, long non-coding RNA.; predicted gene 15401 ; predicted gene 15401 [gene_biotype:protein_coding transcript_biotype:protein_coding]; Non-coding transcript identified by NONCODE: Antisense; novel protein[gene_biotype:protein_coding transcript_bio…	chr6	ncrna
TC0600000898.mm.1	8.40887	9.01368	-1.52078	0.0293912		Gm26264	predicted gene, 26264 [Source:MGI Symbol;Acc:MGI:5456041]	ENSMUST00000083278	ENSEMBL	predicted gene, 26264 [gene_biotype:snRNA transcript_biotype:snRNA]	chr6	ncrna
TC0600001035.mm.1	7.68082	6.7837	1.86235	0.00245045	23945	Mgll	monoglyceride lipase; monoglyceride lipase	NM_001166249; NM_001166250; NM_001166251; NM_011844; ENSMUST00000089449; ENSMUST00000113581; ENSMUST00000113582; ENSMUST00000113585; ENSMUST00000150180; ENSMUST00000151699; ENSMUST00000163271; BC057965; NM_001166249.1; NM_001166250.1; NM_001166251.1; NM_011844.4; OTTMUST00000058395; OTTMUST00000058396; OTTMUST00000058397; OTTMUST00000058398; OTTMUST00000058399; OTTMUST00000058400; NONMMUT057889; …	RefSeq; ENSEMBL; GenBank; MGI/Jackson Lab; Havana transcript; NONCODE; UCSC Genes	Mus musculus monoglyceride lipase (Mgll), transcript variant 3, mRNA.; Mus musculus monoglyceride lipase (Mgll), transcript variant 4, mRNA.; Mus musculus monoglyceride lipase (Mgll), transcript variant 1, mRNA.; Mus musculus monoglyceride lipase (Mgll), transcript variant 2, mRNA.; monoglyceride lipase [gene_biotype:protein_coding transcript_biotype:protein_coding]; monoglyceride lipase [gene_bi…	chr6	coding
TC0600001203.mm.1	6.45994	7.07552	-1.53218	0.0447345	20893	Bhlhe40	basic helix-loop-helix family, member e40; basic helix-loop-helix family, member e40	NM_011498; ENSMUST00000032194; ENSMUST00000163617; ENSMUST00000166346; BC010720; NM_011498.4; OTTMUST00000092370; OTTMUST00000092371; OTTMUST00000092372; uc009ddn.1	RefSeq; ENSEMBL; GenBank; MGI/Jackson Lab; Havana transcript; UCSC Genes	Mus musculus basic helix-loop-helix family, member e40 (Bhlhe40), mRNA.; basic helix-loop-helix family, member e40 [gene_biotype:protein_coding transcript_biotype:protein_coding]; basic helix-loop-helix family, member e40 [gene_biotype:protein_coding transcript_biotype:retained_intron]; Mus musculus basic helix-loop-helix family, member e40, mRNA (cDNA clone MGC:11663 IMAGE:3707474), complete cds…	chr6	coding
TC0600001378.mm.1	4.08502	4.99702	-1.88165	0.0496517				NONMMUT058716; NONMMUT058717; NovelTID_00005492; NovelTID_00005493	NONCODE; Luo lincRNA	Non-coding transcript identified by NONCODE: Linc; Non-coding transcript identified by Luo, et al.	chr6	ncrna
TC0600001580.mm.1	3.60126	2.99999	1.51705	0.0154476				NONMMUT059153	NONCODE	Non-coding transcript identified by NONCODE: Sense No Exonic	chr6	ncrna
TC0600001583.mm.1	5.21163	4.60459	1.52313	0.0169234				NONMMUT059157	NONCODE	Non-coding transcript identified by NONCODE: Sense No Exonic	chr6	ncrna
TC0600001584.mm.1	4.29822	3.58501	1.63944	0.028445				NONMMUT059158	NONCODE	Non-coding transcript identified by NONCODE: Sense No Exonic	chr6	ncrna
TC0600001652.mm.1	7.45594	8.14752	-1.61505	0.022298		n-R5s168	nuclear encoded rRNA 5S 168 [Source:MGI Symbol;Acc:MGI:4422032]	ENSMUST00000083948	ENSEMBL	nuclear encoded rRNA 5S 168 [gene_biotype:rRNA transcript_biotype:rRNA]	chr6	ncrna
TC0600001794.mm.1	4.15849	3.22806	1.90585	0.0314305				NONMMUT055562; NONMMUT055563; NovelTID_00005524; NovelTID_00005525	NONCODE; Luo lincRNA	Non-coding transcript identified by NONCODE: Linc; Non-coding transcript identified by Luo, et al.	chr6	ncrna
TC0600001805.mm.1	10.5142	9.91578	1.51404	0.00152714	18979	Pon1	paraoxonase 1; paraoxonase 1	NM_011134; ENSMUST00000002663; ENSMUST00000176933; ENSMUST00000176945; ENSMUST00000177159; BC012706; NM_011134.3; OTTMUST00000111121; OTTMUST00000111122; OTTMUST00000111123; OTTMUST00000111125; NONMMUT055601; uc009awd.2	RefSeq; ENSEMBL; GenBank; MGI/Jackson Lab; Havana transcript; NONCODE; UCSC Genes	Mus musculus paraoxonase 1 (Pon1), mRNA.; paraoxonase 1 [gene_biotype:protein_coding transcript_biotype:protein_coding]; paraoxonase 1 [gene_biotype:protein_coding transcript_biotype:retained_intron]; Mus musculus paraoxonase 1, mRNA (cDNA clone MGC:13984 IMAGE:4158951), complete cds.; paraoxonase 1 ; paraoxonase 1[gene_biotype:protein_coding transcript_biotype:protein_coding]; paraoxonase 1[gene…	chr6	coding
TC0600001810.mm.1	6.83111	4.61052	4.66084	0.00209195	27273	Pdk4	pyruvate dehydrogenase kinase, isoenzyme 4; pyruvate dehydrogenase kinase, isoenzyme 4	NM_013743; ENSMUST00000019721; ENSMUST00000134068; BC026134; NM_013743.2; OTTMUST00000066404; OTTMUST00000066843; NONMMUT055611; uc009awk.1	RefSeq; ENSEMBL; GenBank; MGI/Jackson Lab; Havana transcript; NONCODE; UCSC Genes	Mus musculus pyruvate dehydrogenase kinase, isoenzyme 4 (Pdk4), mRNA.; pyruvate dehydrogenase kinase, isoenzyme 4 [gene_biotype:protein_coding transcript_biotype:protein_coding]; pyruvate dehydrogenase kinase, isoenzyme 4 [gene_biotype:protein_coding transcript_biotype:retained_intron]; Mus musculus pyruvate dehydrogenase kinase, isoenzyme 4, mRNA (cDNA clone MGC:13840 IMAGE:4188580), complete cd…	chr6	coding
TC0600001824.mm.1	3.99845	5.0768	-2.11163	0.00027895		Gm5873	predicted gene 5873 [Source:MGI Symbol;Acc:MGI:3648385]	ENSMUST00000177157; OTTMUST00000111037	ENSEMBL; Havana transcript	predicted gene 5873 [gene_biotype:processed_pseudogene transcript_biotype:processed_pseudogene]; farnesyl diphosphate synthetase (Fdps) pseudogene[gene_biotype:processed_pseudogene transcript_biotype:processed_pseudogene]	chr6	ncrna
TC0600001835.mm.1	8.30639	9.13739	-1.77892	0.0404251		Gm22155	predicted gene, 22155 [Source:MGI Symbol;Acc:MGI:5451932]	ENSMUST00000083836	ENSEMBL	predicted gene, 22155 [gene_biotype:snRNA transcript_biotype:snRNA]	chr6	ncrna
TC0600001969.mm.1	3.31423	3.92157	-1.52344	0.0415072		Gm25589	predicted gene, 25589 [Source:MGI Symbol;Acc:MGI:5455366]	ENSMUST00000082502	ENSEMBL	predicted gene, 25589 [gene_biotype:snRNA transcript_biotype:snRNA]	chr6	ncrna
TC0600002034.mm.1	4.71167	3.83298	1.8387	0.0158759				NONMMUT056257	NONCODE	Non-coding transcript identified by NONCODE: Sense No Exonic	chr6	ncrna
TC0600002110.mm.1	4.21911	3.62213	1.51254	0.0480175				NONMMUT056495	NONCODE	Non-coding transcript identified by NONCODE: Sense No Exonic	chr6	ncrna
TC0600002123.mm.1	2.28033	3.0233	-1.67362	0.00601275		Gm25402	predicted gene, 25402 [Source:MGI Symbol;Acc:MGI:5455179]	ENSMUST00000082966	ENSEMBL	predicted gene, 25402 [gene_biotype:snoRNA transcript_biotype:snoRNA]	chr6	ncrna
TC0600002129.mm.1	4.71148	4.07934	1.54987	0.0183075	14321	Fth-ps2	ferritin heavy chain, pseudogene 2	OTTMUST00000089889; ENSMUST00000168364; NONMMUT056548	Havana transcript; ENSEMBL; NONCODE	ferritin heavy chain, pseudogene 2[gene_biotype:processed_pseudogene transcript_biotype:processed_pseudogene]; ferritin heavy chain, pseudogene 2 [gene_biotype:processed_pseudogene transcript_biotype:processed_pseudogene]; Non-coding transcript identified by NONCODE: Sense No Exonic	chr6	ncrna
TC0600002326.mm.1	7.47322	6.31495	2.2319	0.0360656	21743	Inmt	indolethylamine N-methyltransferase; indolethylamine N-methyltransferase	NM_009349; ENSMUST00000003569; ENSMUST00000152720; BC013518; NM_009349.3; OTTMUST00000066722; OTTMUST00000066723; uc009can.1	RefSeq; ENSEMBL; GenBank; MGI/Jackson Lab; Havana transcript; UCSC Genes	Mus musculus indolethylamine N-methyltransferase (Inmt), mRNA.; indolethylamine N-methyltransferase [gene_biotype:protein_coding transcript_biotype:protein_coding]; indolethylamine N-methyltransferase [gene_biotype:protein_coding transcript_biotype:retained_intron]; Mus musculus indolethylamine N-methyltransferase, mRNA (cDNA clone MGC:19191 IMAGE:4236077), complete cds.; indolethylamine N-methyl…	chr6	coding
TC0600003554.mm.1	2.6916	3.27711	-1.50058	0.0189311	545848	Igkv4-80	immunoglobulin kappa variable 4-80	NCBI_Gene:545848:presumedTranscript_1; ENSMUST00000103341	MGI/Jackson Lab; ENSEMBL	immunoglobulin kappa variable 4-80 ; immunoglobulin kappa variable 4-80 [gene_biotype:IG_V_gene transcript_biotype:IG_V_gene]	chr6	ncrna
TC0600002492.mm.1	8.77166	7.97665	1.73509	0.00155531	22134; 22135	Tgoln1; Tgoln2	trans-golgi network protein; trans-golgi network protein 2; Synthetic construct Mus musculus clone IMAGE:100063853, MGC:193320 trans-golgi network protein 2 (Tgoln2) mRNA, encodes complete protein.; trans-golgi network protein	NM_009443; NM_009444; BC009143; BC141218; BC145542; BC160205; NM_009443.3; OTTMUST00000097315; uc009ciy.1; ENSMUST00000070524	RefSeq; GenBank; MGI/Jackson Lab; Havana transcript; UCSC Genes; ENSEMBL	Mus musculus trans-golgi network protein (Tgoln1), mRNA.; Mus musculus trans-golgi network protein 2 (Tgoln2), mRNA.; Mus musculus trans-golgi network protein, mRNA (cDNA clone MGC:11627 IMAGE:3157708), complete cds.; Mus musculus trans-golgi network protein, mRNA (cDNA clone MGC:176179 IMAGE:9055830), complete cds.; Mus musculus trans-golgi network protein, mRNA (cDNA clone MGC:179113 IMAGE:9054…	chr6	coding
TC0600002494.mm.1	6.57634	5.5776	1.99825	0.00108334	232089	Elmod3	ELMO/CED-12 domain containing 3; ELMO/CED-12 domain containing 3	NM_001253692; NM_144917; ENSMUST00000070990; ENSMUST00000114069; ENSMUST00000140825; ENSMUST00000141833; ENSMUST00000148108; ENSMUST00000152705; BC016193; NM_001253692.1; NM_144917.5; OTTMUST00000057460; OTTMUST00000057461; OTTMUST00000057462; OTTMUST00000057463; OTTMUST00000057464; OTTMUST00000057465; NONMMUT057440; uc009ciu.2; uc009civ.2; uc009ciw.2	RefSeq; ENSEMBL; GenBank; MGI/Jackson Lab; Havana transcript; NONCODE; UCSC Genes	Mus musculus ELMO/CED-12 domain containing 3 (Elmod3), transcript variant 2, mRNA.; Mus musculus ELMO/CED-12 domain containing 3 (Elmod3), transcript variant 1, mRNA.; ELMO/CED-12 domain containing 3 [gene_biotype:protein_coding transcript_biotype:protein_coding]; ELMO/CED-12 domain containing 3 [gene_biotype:protein_coding transcript_biotype:processed_transcript]; ELMO/CED-12 domain containing 3…	chr6	coding
TC0600002897.mm.1	4.80464	5.46148	-1.57662	0.0248328		n-R5s165	nuclear encoded rRNA 5S 165 [Source:MGI Symbol;Acc:MGI:4422029]	ENSMUST00000104074	ENSEMBL	nuclear encoded rRNA 5S 165 [gene_biotype:rRNA transcript_biotype:rRNA]	chr6	ncrna
TC0600002920.mm.1	5.16116	3.72608	2.70397	0.00162274	14311	Cidec	cell death-inducing DFFA-like effector c; cell death-inducing DFFA-like effector c	NM_178373; ENSMUST00000032416; ENSMUST00000113089; ENSMUST00000113091; ENSMUST00000133348; BC099676; NM_178373.3; OTTMUST00000055897; OTTMUST00000055898; OTTMUST00000055899; OTTMUST00000055900; uc009dgb.1; uc009dgc.1	RefSeq; ENSEMBL; GenBank; MGI/Jackson Lab; Havana transcript; UCSC Genes	Mus musculus cell death-inducing DFFA-like effector c (Cidec), transcript variant 1, mRNA.; cell death-inducing DFFA-like effector c [gene_biotype:protein_coding transcript_biotype:protein_coding]; Mus musculus cell death-inducing DFFA-like effector c, mRNA (cDNA clone MGC:106221 IMAGE:5043221), complete cds.; cell death-inducing DFFA-like effector c ; cell death-inducing DFFA-like effector c[gen…	chr6	coding
TC0600003330.mm.1	3.13174	3.87669	-1.67592	0.0313742	14917	Gucy2c	guanylate cyclase 2c; guanylate cyclase 2c	NM_001127318; NM_145067; ENSMUST00000032338; ENSMUST00000078095; BC099968; NM_001127318.1; NM_145067.3; OTTMUST00000085207; OTTMUST00000085209; uc009emb.2; uc009emc.2	RefSeq; ENSEMBL; GenBank; MGI/Jackson Lab; Havana transcript; UCSC Genes	Mus musculus guanylate cyclase 2c (Gucy2c), transcript variant 1, mRNA.; Mus musculus guanylate cyclase 2c (Gucy2c), transcript variant 2, mRNA.; guanylate cyclase 2c [gene_biotype:protein_coding transcript_biotype:protein_coding]; Mus musculus guanylate cyclase 2c, mRNA (cDNA clone MGC:107510 IMAGE:6432585), complete cds.; guanylate cyclase 2c ; guanylate cyclase 2c[gene_biotype:protein_coding t…	chr6	coding
TC0600003364.mm.1	5.64712	4.49389	2.22411	0.00302811	28250	Slco1a4	solute carrier organic anion transporter family, member 1a4; Synthetic construct Mus musculus clone IMAGE:100062527, MGC:190906 solute carrier organic anion transporter family, member 1a4 (Slco1a4) mRNA, encodes complete protein.; solute carrier organic anion transporter family, member 1a4	NM_030687; ENSMUST00000032364; ENSMUST00000163678; ENSMUST00000165990; BC156830; NM_030687.1; OTTMUST00000094526; OTTMUST00000094538; uc009eos.1	RefSeq; ENSEMBL; GenBank; MGI/Jackson Lab; Havana transcript; UCSC Genes	Mus musculus solute carrier organic anion transporter family, member 1a4 (Slco1a4), mRNA.; solute carrier organic anion transporter family, member 1a4 [gene_biotype:protein_coding transcript_biotype:protein_coding]; Synthetic construct Mus musculus clone IMAGE:100062527, MGC:190906 solute carrier organic anion transporter family, member 1a4 (Slco1a4) mRNA, encodes complete protein.; solute carrie…	chr6	coding
TC0700000014.mm.1	6.69025	6.07241	1.53457	0.0134308	66091	Ndufa3	NADH dehydrogenase (ubiquinone) 1 alpha subcomplex, 3; NADH dehydrogenase (ubiquinone) 1 alpha subcomplex, 3	NM_025348; ENSMUST00000076657; ENSMUST00000108644; ENSMUST00000134683; ENSMUST00000148403; ENSMUST00000150497; ENSMUST00000156712; BC120712; BC120714; NM_025348.2; OTTMUST00000056820; OTTMUST00000056821; OTTMUST00000056822; OTTMUST00000056823; OTTMUST00000056824; OTTMUST00000069088; NONMMUT059699; uc009eve.1	RefSeq; ENSEMBL; GenBank; MGI/Jackson Lab; Havana transcript; NONCODE; UCSC Genes	Mus musculus NADH dehydrogenase (ubiquinone) 1 alpha subcomplex, 3 (Ndufa3), mRNA.; NADH dehydrogenase (ubiquinone) 1 alpha subcomplex, 3 [gene_biotype:protein_coding transcript_biotype:protein_coding]; NADH dehydrogenase (ubiquinone) 1 alpha subcomplex, 3 [gene_biotype:protein_coding transcript_biotype:nonsense_mediated_decay]; NADH dehydrogenase (ubiquinone) 1 alpha subcomplex, 3 [gene_biotype:…	chr7	coding
TC0700000229.mm.1	9.61377	10.5972	-1.9772	0.0326211		n-R5s151	nuclear encoded rRNA 5S 151 [Source:MGI Symbol;Acc:MGI:4422013]	ENSMUST00000083959	ENSEMBL	nuclear encoded rRNA 5S 151 [gene_biotype:rRNA transcript_biotype:rRNA]	chr7	ncrna
TC0700000294.mm.1	5.88066	6.51287	-1.54994	0.0392126		Gm25134	predicted gene, 25134 [Source:MGI Symbol;Acc:MGI:5454911]	ENSMUST00000082646	ENSEMBL	predicted gene, 25134 [gene_biotype:snRNA transcript_biotype:snRNA]	chr7	ncrna
TC0700000446.mm.1	10.782	10.1313	1.57	0.0137637	13085	Cyp2a12	cytochrome P450, family 2, subfamily a, polypeptide 12; cytochrome P450, family 2, subfamily a, polypeptide 12	NM_133657; ENSMUST00000075552; BC018356; BC094017; NM_133657.1; uc009fux.1	RefSeq; ENSEMBL; GenBank; MGI/Jackson Lab; UCSC Genes	Mus musculus cytochrome P450, family 2, subfamily a, polypeptide 12 (Cyp2a12), mRNA.; cytochrome P450, family 2, subfamily a, polypeptide 12 [gene_biotype:protein_coding transcript_biotype:protein_coding]; Mus musculus cytochrome P450, family 2, subfamily a, polypeptide 12, mRNA (cDNA clone MGC:25859 IMAGE:4195640), complete cds.; Mus musculus cytochrome P450, family 2, subfamily a, polypeptide 1…	chr7	coding
TC0700000514.mm.1	7.60464	6.86842	1.6658	0.00260057	51798	Ech1	enoyl coenzyme A hydratase 1, peroxisomal; enoyl coenzyme A hydratase 1, peroxisomal	NM_016772; ENSMUST00000066264; ENSMUST00000124017; ENSMUST00000127590; ENSMUST00000132376; ENSMUST00000137834; ENSMUST00000143708; ENSMUST00000154839; BC068112; BC087924; NM_016772.1; OTTMUST00000077226; OTTMUST00000077227; OTTMUST00000077228; OTTMUST00000077229; OTTMUST00000077231; OTTMUST00000077232; OTTMUST00000077233; NONMMUT060475; NONMMUT060476; uc009gab.1	RefSeq; ENSEMBL; GenBank; MGI/Jackson Lab; Havana transcript; NONCODE; UCSC Genes	Mus musculus enoyl coenzyme A hydratase 1, peroxisomal (Ech1), mRNA.; enoyl coenzyme A hydratase 1, peroxisomal [gene_biotype:protein_coding transcript_biotype:protein_coding]; enoyl coenzyme A hydratase 1, peroxisomal [gene_biotype:protein_coding transcript_biotype:processed_transcript]; enoyl coenzyme A hydratase 1, peroxisomal [gene_biotype:protein_coding transcript_biotype:retained_intron]; M…	chr7	coding
TC0700000527.mm.1	5.68973	6.4783	-1.72736	0.00327699	68458	Ppp1r14a	protein phosphatase 1, regulatory (inhibitor) subunit 14A; protein phosphatase 1, regulatory (inhibitor) subunit 14A	NM_026731; ENSMUST00000048187; BC010832; NM_026731.3; uc009gbn.1	RefSeq; ENSEMBL; GenBank; MGI/Jackson Lab; UCSC Genes	Mus musculus protein phosphatase 1, regulatory (inhibitor) subunit 14A (Ppp1r14a), mRNA.; protein phosphatase 1, regulatory (inhibitor) subunit 14A [gene_biotype:protein_coding transcript_biotype:protein_coding]; Mus musculus protein phosphatase 1, regulatory (inhibitor) subunit 14A, mRNA (cDNA clone MGC:19334 IMAGE:4216018), complete cds.; protein phosphatase 1, regulatory (inhibitor) subunit 14A	chr7	coding
TC0700000652.mm.1	7.6468	8.2479	-1.51687	0.0147935	12606	Cebpa	CCAAT/enhancer binding protein (C/EBP), alpha; CCAAT/enhancer binding protein (C/EBP), alpha	NM_001287514; NM_001287515; NM_001287521; NM_001287523; NM_007678; ENSMUST00000042985; BC011118; BC028890; BC051102; BC058161; NM_007678.3; uc009gjl.2	RefSeq; ENSEMBL; GenBank; MGI/Jackson Lab; UCSC Genes	Mus musculus CCAAT/enhancer binding protein (C/EBP), alpha (Cebpa), transcript variant 1, mRNA.; CCAAT/enhancer binding protein (C/EBP), alpha [gene_biotype:protein_coding transcript_biotype:protein_coding]; Mus musculus CCAAT/enhancer binding protein (C/EBP), alpha, mRNA (cDNA clone MGC:18705 IMAGE:4194023), complete cds.; Mus musculus CCAAT/enhancer binding protein (C/EBP), alpha, mRNA (cDNA cl…	chr7	coding
TC0700000861.mm.1	4.63251	6.31331	-3.20606	0.000154116	13170	Dbp	D site albumin promoter binding protein; D site albumin promoter binding protein	NM_016974; ENSMUST00000080885; ENSMUST00000107740; ENSMUST00000107741; ENSMUST00000123587; ENSMUST00000155439; BC018323; NM_016974.3; OTTMUST00000056095; OTTMUST00000056096; OTTMUST00000056097; OTTMUST00000056098; OTTMUST00000056099; uc009gws.2	RefSeq; ENSEMBL; GenBank; MGI/Jackson Lab; Havana transcript; UCSC Genes	Mus musculus D site albumin promoter binding protein (Dbp), mRNA.; D site albumin promoter binding protein [gene_biotype:protein_coding transcript_biotype:protein_coding]; D site albumin promoter binding protein [gene_biotype:protein_coding transcript_biotype:retained_intron]; Mus musculus D site albumin promoter binding protein, mRNA (cDNA clone MGC:18803 IMAGE:4195116), complete cds.; D site al…	chr7	coding
TC0700001133.mm.1	5.82532	4.88591	1.91774	0.00589577		LOC100861920	PREDICTED: uncharacterized LOC100861920 (LOC100861920), miscRNA.	XR_140818.1	MGI/Jackson Lab	PREDICTED: uncharacterized LOC100861920 (LOC100861920), miscRNA.	chr7	ncrna
TC0700001275.mm.1	7.78545	7.19415	1.5066	7.55271e-05	233489	Picalm	phosphatidylinositol binding clathrin assembly protein; phosphatidylinositol binding clathrin assembly protein	NM_001252520; NM_001252521; NM_001252522; NM_001252523; NM_001252524; NM_146194; ENSMUST00000049537; BC011470; BC021491; BC023843; BC025566; BC057683; NM_001252520.1; NM_001252521.1; NM_001252522.1; NM_001252523.1; NM_001252524.1; NM_146194.4; NONMMUT062664; NONMMUT062669; uc009igp.1; uc009igq.2; uc009igr.2; uc009igs.2; uc009igt.2; uc009igu.2; uc009igv.2; uc009igw.2	RefSeq; ENSEMBL; GenBank; MGI/Jackson Lab; NONCODE; UCSC Genes	Mus musculus phosphatidylinositol binding clathrin assembly protein (Picalm), transcript variant 2, mRNA.; Mus musculus phosphatidylinositol binding clathrin assembly protein (Picalm), transcript variant 3, mRNA.; Mus musculus phosphatidylinositol binding clathrin assembly protein (Picalm), transcript variant 4, mRNA.; Mus musculus phosphatidylinositol binding clathrin assembly protein (Picalm), …	chr7	coding
TC0700001317.mm.1	6.47397	5.57877	1.85987	0.000370926	75985	Rab30	RAB30, member RAS oncogene family; RAB30, member RAS oncogene family	NM_029494; ENSMUST00000032879; ENSMUST00000107179; ENSMUST00000107180; BC017550; NM_029494.2; OTTMUST00000053932; OTTMUST00000053933; OTTMUST00000053934; uc009iig.1; uc009iif.1	RefSeq; ENSEMBL; GenBank; MGI/Jackson Lab; Havana transcript; UCSC Genes	Mus musculus RAB30, member RAS oncogene family (Rab30), mRNA.; RAB30, member RAS oncogene family [gene_biotype:protein_coding transcript_biotype:protein_coding]; Mus musculus RAB30, member RAS oncogene family, mRNA (cDNA clone MGC:28980 IMAGE:4503909), complete cds.; RAB30, member RAS oncogene family ; RAB30, member RAS oncogene family[gene_biotype:protein_coding transcript_biotype:protein_coding]	chr7	coding
TC0700001320.mm.1	3.95953	2.77046	2.28006	0.00273186				KnowTID_00006609; NONMMUT062744	Luo lincRNA; NONCODE	Non-coding transcript identified by Luo, et al.; Non-coding transcript identified by NONCODE: Linc	chr7	ncrna
TC0700001388.mm.1	8.37882	9.1002	-1.64876	0.0296932		n-R5s156	nuclear encoded rRNA 5S 156 [Source:MGI Symbol;Acc:MGI:4422019]	ENSMUST00000083377	ENSEMBL	nuclear encoded rRNA 5S 156 [gene_biotype:rRNA transcript_biotype:rRNA]	chr7	ncrna
TC0700001418.mm.1	4.53646	3.8772	1.57927	0.0254174				NONMMUT062956	NONCODE	Non-coding transcript identified by NONCODE: Sense No Exonic	chr7	ncrna
TC0700001653.mm.1	2.47934	1.7676	1.63778	0.00716991				NONMMUT063269	NONCODE	Non-coding transcript identified by NONCODE: Sense No Exonic	chr7	ncrna
TC0700001660.mm.1	6.31141	4.47893	3.5615	0.000290506	11865	Arntl	aryl hydrocarbon receptor nuclear translocator-like; aryl hydrocarbon receptor nuclear translocator-like	NM_001243048; NM_007489; ENSMUST00000047321; BC011080; BC025973; NM_001243048.1; NM_007489.4; uc009jhe.2; uc009jhf.2; uc009jhh.1; uc009jhi.2; uc009jhj.2; uc009jhk.2; uc012fsi.1	RefSeq; ENSEMBL; GenBank; MGI/Jackson Lab; UCSC Genes	Mus musculus aryl hydrocarbon receptor nuclear translocator-like (Arntl), transcript variant 2, mRNA.; Mus musculus aryl hydrocarbon receptor nuclear translocator-like (Arntl), transcript variant 1, mRNA.; aryl hydrocarbon receptor nuclear translocator-like [gene_biotype:protein_coding transcript_biotype:protein_coding]; Mus musculus aryl hydrocarbon receptor nuclear translocator-like, mRNA (cDNA…	chr7	coding
TC0700001662.mm.1	4.10663	2.55853	2.92431	0.00450116				BC150970; NONMMUT063286; NONMMUT063287; uc012fsj.1	GenBank; NONCODE; UCSC Genes	Mus musculus RIKEN cDNA A630005I04 gene, mRNA (cDNA clone MGC:183883 IMAGE:9087883), complete cds.; Non-coding transcript identified by NONCODE: Sense No Exonic	chr7	ncrna
TC0700001663.mm.1	2.85692	1.91329	1.92336	0.00904524				NONMMUT063288	NONCODE	Non-coding transcript identified by NONCODE: Sense No Exonic	chr7	ncrna
TC0700001698.mm.1	3.08372	3.6766	-1.50826	0.00200574	74424	Tmc5	transmembrane channel-like gene family 5; transmembrane channel-like gene family 5	NM_001105252; NM_028930; ENSMUST00000057320; ENSMUST00000098088; ENSMUST00000121715; ENSMUST00000121744; ENSMUST00000155572; BC108382; NM_001105252.1; NM_028930.3; OTTMUST00000076454; OTTMUST00000076455; OTTMUST00000076456; OTTMUST00000076457; uc009jke.2; uc009jkf.2; uc009jkg.2	RefSeq; ENSEMBL; GenBank; MGI/Jackson Lab; Havana transcript; UCSC Genes	Mus musculus transmembrane channel-like gene family 5 (Tmc5), transcript variant 1, mRNA.; Mus musculus transmembrane channel-like gene family 5 (Tmc5), transcript variant 2, mRNA.; transmembrane channel-like gene family 5 [gene_biotype:protein_coding transcript_biotype:protein_coding]; Mus musculus transmembrane channel-like gene family 5, mRNA (cDNA clone MGC:118178 IMAGE:4457529), complete cds…	chr7	coding
TC0700001715.mm.1	7.45884	6.82398	1.55279	0.0151525	20216	Acsm3	acyl-CoA synthetase medium-chain family member 3; acyl-CoA synthetase medium-chain family member 3	NM_016870; NM_212441; NM_212442; ENSMUST00000063770; ENSMUST00000106526; ENSMUST00000106527; ENSMUST00000106528; ENSMUST00000106529; ENSMUST00000149598; ENSMUST00000149766; ENSMUST00000154828; BC015248; NM_016870.3; NM_212441.2; NM_212442.2; OTTMUST00000063140; OTTMUST00000063141; OTTMUST00000063142; OTTMUST00000063143; OTTMUST00000063144; OTTMUST00000063145; OTTMUST00000063146; NONMMUT063434; uc…	RefSeq; ENSEMBL; GenBank; MGI/Jackson Lab; Havana transcript; NONCODE; UCSC Genes	Mus musculus acyl-CoA synthetase medium-chain family member 3 (Acsm3), transcript variant 1, mRNA.; Mus musculus acyl-CoA synthetase medium-chain family member 3 (Acsm3), transcript variant 2, mRNA.; Mus musculus acyl-CoA synthetase medium-chain family member 3 (Acsm3), transcript variant 3, mRNA.; acyl-CoA synthetase medium-chain family member 3 [gene_biotype:protein_coding transcript_biotype:pr…	chr7	coding
TC0700001886.mm.1	7.02546	5.9762	2.06947	0.00170749	29810	Bag3	BCL2-associated athanogene 3; BCL2-associated athanogene 3	NM_013863; ENSMUST00000033136; BC145765; NM_013863.5; uc009jzb.2	RefSeq; ENSEMBL; GenBank; MGI/Jackson Lab; UCSC Genes	Mus musculus BCL2-associated athanogene 3 (Bag3), mRNA.; BCL2-associated athanogene 3 [gene_biotype:protein_coding transcript_biotype:protein_coding]; Mus musculus BCL2-associated athanogene 3, mRNA (cDNA clone MGC:175652 IMAGE:40131068), complete cds.; BCL2-associated athanogene 3	chr7	coding
TC0700001887.mm.1	6.0489	5.05757	1.98802	0.020363				NONMMUT063826	NONCODE	Non-coding transcript identified by NONCODE: Sense No Exonic	chr7	ncrna
TC0700002029.mm.1	9.0864	8.41169	1.59627	0.000136925		Gm15542	predicted gene 15542 [Source:MGI Symbol;Acc:MGI:3782990]	ENSMUST00000121585; OTTMUST00000056982	ENSEMBL; Havana transcript	predicted gene 15542 [gene_biotype:processed_pseudogene transcript_biotype:processed_pseudogene]; DnaJ (Hsp40) homolog, subfamily A, member 1 (Dnaja1) pseudogene[gene_biotype:processed_pseudogene transcript_biotype:processed_pseudogene]	chr7	ncrna
TC0700002053.mm.1	7.97279	7.11578	1.81129	0.022903	66853	Pnpla2	patatin-like phospholipase domain containing 2; patatin-like phospholipase domain containing 2	NM_001163689; NM_025802; NR_028142; ENSMUST00000026583; ENSMUST00000064151; ENSMUST00000164016; ENSMUST00000164924; ENSMUST00000165487; ENSMUST00000169665; ENSMUST00000169723; BC019188; BC044781; BC064747; NM_001163689.1; NM_025802.3; NR_028142.1; OTTMUST00000090404; OTTMUST00000090405; OTTMUST00000090406; OTTMUST00000090408; OTTMUST00000090478; OTTMUST00000090491; OTTMUST00000090492; uc009klg.2;…	RefSeq; ENSEMBL; GenBank; MGI/Jackson Lab; Havana transcript; UCSC Genes	Mus musculus patatin-like phospholipase domain containing 2 (Pnpla2), transcript variant 1, mRNA.; Mus musculus patatin-like phospholipase domain containing 2 (Pnpla2), transcript variant 2, mRNA.; Mus musculus patatin-like phospholipase domain containing 2 (Pnpla2), transcript variant 3, non-coding RNA.; patatin-like phospholipase domain containing 2 [gene_biotype:protein_coding transcript_bioty…	chr7	coding
TC0700002088.mm.1	10.2341	9.53981	1.61804	0.0159953	12520	Cd81	CD81 antigen; CD81 antigen	NM_133655; ENSMUST00000037941; ENSMUST00000128762; ENSMUST00000132303; ENSMUST00000141954; BC011433; NM_133655.2; OTTMUST00000079053; OTTMUST00000079054; OTTMUST00000079055; OTTMUST00000079056; NONMMUT064301; uc009kou.2	RefSeq; ENSEMBL; GenBank; MGI/Jackson Lab; Havana transcript; NONCODE; UCSC Genes	Mus musculus CD81 antigen (Cd81), mRNA.; CD81 antigen [gene_biotype:protein_coding transcript_biotype:protein_coding]; CD81 antigen [gene_biotype:protein_coding transcript_biotype:retained_intron]; CD81 antigen [gene_biotype:protein_coding transcript_biotype:processed_transcript]; Mus musculus CD81 antigen, mRNA (cDNA clone MGC:6316 IMAGE:2811801), complete cds.; CD81 antigen ; CD 81 antigen[gene…	chr7	coding
TC0700002316.mm.1	9.77978	8.92337	1.81054	0.00198109		Gm6900	predicted gene 6900 [Source:MGI Symbol;Acc:MGI:3645052]	ENSMUST00000178971; OTTMUST00000113279	ENSEMBL; Havana transcript	predicted gene 6900 [gene_biotype:processed_pseudogene transcript_biotype:processed_pseudogene]; eukaryotic translation initiation factor 1 (Eif1) pesudogene[gene_biotype:processed_pseudogene transcript_biotype:processed_pseudogene]	chr7	ncrna
TC0700002510.mm.1	5.44049	6.19406	-1.68597	0.0228967		n-R5s152	nuclear encoded rRNA 5S 152 [Source:MGI Symbol;Acc:MGI:4422015]	ENSMUST00000093641	ENSEMBL	nuclear encoded rRNA 5S 152 [gene_biotype:rRNA transcript_biotype:rRNA]	chr7	ncrna
TC0700002635.mm.1	8.91804	8.33187	1.50125	0.00224974	26365	Ceacam1	carcinoembryonic antigen-related cell adhesion molecule 1; carcinoembryonic antigen-related cell adhesion molecule 1	NM_001039185; NM_001039186; NM_001039187; NM_011926; ENSMUST00000098666; ENSMUST00000098668; ENSMUST00000098669; NM_001039185.1; NM_001039186.1; NM_001039187.1; NM_011926.2; uc009fsu.1; uc009fsv.1; uc009fsw.1; uc009fsx.1; uc009fsy.1; uc009fsz.1; uc009fta.1; uc009ftb.1; uc012ffu.1	RefSeq; ENSEMBL; MGI/Jackson Lab; UCSC Genes	Mus musculus carcinoembryonic antigen-related cell adhesion molecule 1 (Ceacam1), transcript variant 1, mRNA.; Mus musculus carcinoembryonic antigen-related cell adhesion molecule 1 (Ceacam1), transcript variant 2, mRNA.; Mus musculus carcinoembryonic antigen-related cell adhesion molecule 1 (Ceacam1), transcript variant 4, mRNA.; Mus musculus carcinoembryonic antigen-related cell adhesion molecu…	chr7	coding
TC0700002655.mm.1	8.70343	8.02733	1.59782	0.00780351	233005	Cyp2a22	cytochrome P450, family 2, subfamily a, polypeptide 22; cytochrome P450, family 2, subfamily a, polypeptide 22	NM_001101467; ENSMUST00000170227; BC151116; BC158034; NM_001101467.1; uc012fgf.1	RefSeq; ENSEMBL; GenBank; MGI/Jackson Lab; UCSC Genes	Mus musculus cytochrome P450, family 2, subfamily a, polypeptide 22 (Cyp2a22), mRNA.; cytochrome P450, family 2, subfamily a, polypeptide 22 [gene_biotype:protein_coding transcript_biotype:protein_coding]; Mus musculus cytochrome P450, family 2, subfamily a, polypeptide 22, mRNA (cDNA clone MGC:184029 IMAGE:9088029), complete cds.; Mus musculus cytochrome P450, family 2, subfamily a, polypeptide …	chr7	coding
TC0700002781.mm.1	11.5296	10.2352	2.45287	0.0367783	66438	Hamp2	hepcidin antimicrobial peptide 2; hepcidin antimicrobial peptide 2	NM_183257; ENSMUST00000074671; BC086895; NM_183257.3; uc009ghd.2	RefSeq; ENSEMBL; GenBank; MGI/Jackson Lab; UCSC Genes	Mus musculus hepcidin antimicrobial peptide 2 (Hamp2), mRNA.; hepcidin antimicrobial peptide 2 [gene_biotype:protein_coding transcript_biotype:protein_coding]; Mus musculus hepcidin antimicrobial peptide 2, mRNA (cDNA clone MGC:107568 IMAGE:6765293), complete cds.; hepcidin antimicrobial peptide 2	chr7	coding
TC0700002783.mm.1	12.0191	10.7341	2.43666	0.0403913	84506	Hamp	hepcidin antimicrobial peptide; hepcidin antimicrobial peptide	NM_032541; ENSMUST00000062620; BC021587; NM_032541.1; uc009ghf.1	RefSeq; ENSEMBL; GenBank; MGI/Jackson Lab; UCSC Genes	Mus musculus hepcidin antimicrobial peptide (Hamp), mRNA.; hepcidin antimicrobial peptide [gene_biotype:protein_coding transcript_biotype:protein_coding]; Mus musculus hepcidin antimicrobial peptide, mRNA (cDNA clone MGC:35592 IMAGE:5097807), complete cds.; hepcidin antimicrobial peptide	chr7	coding
TC0700002872.mm.1	3.82674	4.51051	-1.60634	0.0492488		Gm22302	predicted gene, 22302 [Source:MGI Symbol;Acc:MGI:5452079]	ENSMUST00000082657	ENSEMBL	predicted gene, 22302 [gene_biotype:snRNA transcript_biotype:snRNA]	chr7	ncrna
TC0700003428.mm.1	3.12918	3.82499	-1.61979	0.0217859				NONMMUT061892; NovelTID_00005872	NONCODE; Luo lincRNA	Non-coding transcript identified by NONCODE: Linc; Non-coding transcript identified by Luo, et al.	chr7	ncrna
TC0700003568.mm.1	8.26788	6.4308	3.57288	0.000654153	18631	Pex11a	peroxisomal biogenesis factor 11 alpha; peroxisomal biogenesis factor 11 alpha	NM_011068; ENSMUST00000032761; ENSMUST00000139620; ENSMUST00000150606; BC023439; NM_011068.1; OTTMUST00000061470; OTTMUST00000061471; OTTMUST00000061472; NONMMUT062355; uc009hyy.1; uc009hyz.1	RefSeq; ENSEMBL; GenBank; MGI/Jackson Lab; Havana transcript; NONCODE; UCSC Genes	Mus musculus peroxisomal biogenesis factor 11 alpha (Pex11a), mRNA.; peroxisomal biogenesis factor 11 alpha [gene_biotype:protein_coding transcript_biotype:protein_coding]; peroxisomal biogenesis factor 11 alpha [gene_biotype:protein_coding transcript_biotype:processed_transcript]; Mus musculus peroxisomal biogenesis factor 11 alpha, mRNA (cDNA clone MGC:31005 IMAGE:5251140), complete cds.; perox…	chr7	coding
TC0700003713.mm.1	2.33782	1.74391	1.50933	0.0111372				NONMMUT062627	NONCODE	Non-coding transcript identified by NONCODE: Sense No Exonic	chr7	ncrna
TC0700003764.mm.1	5.60674	6.28724	-1.6027	0.0223333	21835	Thrsp	thyroid hormone responsive; thyroid hormone responsive	NM_009381; ENSMUST00000043077; BC009165; NM_009381.2; OTTMUST00000064553; uc009ije.1	RefSeq; ENSEMBL; GenBank; MGI/Jackson Lab; Havana transcript; UCSC Genes	Mus musculus thyroid hormone responsive (Thrsp), mRNA.; thyroid hormone responsive [gene_biotype:protein_coding transcript_biotype:protein_coding]; Mus musculus thyroid hormone responsive SPOT14 homolog (Rattus), mRNA (cDNA clone MGC:6563 IMAGE:2811774), complete cds.; thyroid hormone responsive ; thyroid hormone responsive SPOT14 homolog (Rattus)[gene_biotype:protein_coding transcript_biotype:pr…	chr7	coding
TC0700003768.mm.1	4.89542	5.67971	-1.72224	0.0171325				NONMMUT062842	NONCODE	Non-coding transcript identified by NONCODE: Linc	chr7	ncrna
TC0700003940.mm.1	4.29245	4.90663	-1.53068	0.00125675	319236	Trim12c	tripartite motif-containing 12C; tripartite motif-containing 12C	NM_001146007; NM_175677; ENSMUST00000059037; ENSMUST00000130139; BC038937; NM_001146007.1; NM_175677.4; OTTMUST00000045997; OTTMUST00000045998; ENSMUST00000184402; uc009iwb.2; uc009iwc.2	RefSeq; ENSEMBL; GenBank; MGI/Jackson Lab; Havana transcript; UCSC Genes	Mus musculus tripartite motif-containing 12C (Trim12c), transcript variant 1, mRNA.; Mus musculus tripartite motif-containing 12C (Trim12c), transcript variant 2, mRNA.; tripartite motif-containing 12C [gene_biotype:protein_coding transcript_biotype:protein_coding]; Mus musculus RIKEN cDNA 9230105E10 gene, mRNA (cDNA clone MGC:46806 IMAGE:2648191), complete cds.; tripartite motif-containing 12C ;…	chr7	coding
TC0700003990.mm.1	7.98804	7.20349	1.72256	0.0208322	12751	Tpp1	tripeptidyl peptidase I; tripeptidyl peptidase I	NM_009906; ENSMUST00000033184; BC024820; NM_009906.5; uc009izg.1; uc012frq.1	RefSeq; ENSEMBL; GenBank; MGI/Jackson Lab; UCSC Genes	Mus musculus tripeptidyl peptidase I (Tpp1), mRNA.; tripeptidyl peptidase I [gene_biotype:protein_coding transcript_biotype:protein_coding]; Mus musculus tripeptidyl peptidase I, mRNA (cDNA clone MGC:36086 IMAGE:5360558), complete cds.; tripeptidyl peptidase I	chr7	coding
TC0700003996.mm.1	5.00973	5.69058	-1.60309	0.0125581	74558; 100042856; 100417829; 100417831	Gvin1; Gm4070; Gm17757; Gm18853	GTPase, very large interferon inducible 1 (Gvin1), transcript variant 2, mRNA.; predicted gene 4070; GTPase, very large interferon inducible 1; GTPase, very large interferon inducible 1 pseudogene; Synthetic construct Mus musculus clone IMAGE:100069525, MGC:199427 GTPase, very large interferon inducible 1 (Gvin1) mRNA, encodes complete protein.; predicted gene 4070	NM_001039160_2; NM_001243039; NM_001243040; NM_029000; NR_040453; NR_040456; ENSMUST00000106766; ENSMUST00000176467; ENSMUST00000176969; ENSMUST00000176994; BC172717; NM_001243039.1; NM_001243040.1; ENSMUST00000184149; NONMMUT063116; OTTMUST00000103894; OTTMUST00000103895; OTTMUST00000103896; OTTMUST00000103897; OTTMUST00000117419; uc009izn.1; uc009izo.1; uc029wnp.1	RefSeq; ENSEMBL; GenBank; MGI/Jackson Lab; NONCODE; Havana transcript; UCSC Genes	GTPase, very large interferon inducible 1 (Gvin1), transcript variant 2, mRNA.; Mus musculus predicted gene 4070 (Gm4070), transcript variant 1, mRNA.; Mus musculus predicted gene 4070 (Gm4070), transcript variant 2, mRNA.; Mus musculus GTPase, very large interferon inducible 1 (Gvin1), transcript variant 1, mRNA.; Mus musculus predicted gene, 17757 (Gm17757), non-coding RNA.; Mus musculus predic…	chr7	coding
TC0700004002.mm.1	5.46274	6.30796	-1.79654	0.0201247	74558; 100042856	Gvin1; Gm4070	GTPase, very large interferon inducible 1; predicted gene 4070 (Gm4070), transcript variant 1, mRNA.; predicted gene 4070 (Gm4070), transcript variant 2, mRNA.; GTPase, very large interferon inducible 1 (Gvin1), transcript variant 1, mRNA.; Synthetic construct Mus musculus clone IMAGE:100069525, MGC:199427 GTPase, very large interferon inducible 1 (Gvin1) mRNA, encodes complete protein.; GTPase, …	NM_001039160; NM_001243039_2; NM_001243040_2; NM_029000_2; ENSMUST00000006667; ENSMUST00000183409; BC172717_2; NM_001039160.2; NM_029000.3; OTTMUST00000117424; OTTMUST00000117432; uc009izp.1; uc009izq.1	RefSeq; ENSEMBL; GenBank; MGI/Jackson Lab; Havana transcript; UCSC Genes	Mus musculus GTPase, very large interferon inducible 1 (Gvin1), transcript variant 2, mRNA.; predicted gene 4070 (Gm4070), transcript variant 1, mRNA.; predicted gene 4070 (Gm4070), transcript variant 2, mRNA.; GTPase, very large interferon inducible 1 (Gvin1), transcript variant 1, mRNA.; GTPase, very large interferon inducible 1 [gene_biotype:protein_coding transcript_biotype:protein_coding]; S…	chr7	coding
TC0700004007.mm.1	3.24848	4.03388	-1.72358	0.0214149	668128	Gm8989	predicted gene 8989 (Gm8989), non-coding RNA.; very large inducible GTPase 1 pseudogene	NR_030720_2; ENSMUST00000178479; ENSMUST00000179307; ENSMUST00000184782; OTTMUST00000117434; uc012frt.1	RefSeq; ENSEMBL; Havana transcript; UCSC Genes	predicted gene 8989 (Gm8989), non-coding RNA.; predicted gene, 21911 ; predicted gene 8989 [gene_biotype:unprocessed_pseudogene transcript_biotype:unprocessed_pseudogene]; GTPase, very large interferon inducible 1 (Gvin1) pseudogene[gene_biotype:unprocessed_pseudogene transcript_biotype:unprocessed_pseudogene]; Mus musculus predicted gene 8989 (Gm8989), non-coding RNA.	chr7	ncrna
TC0700004076.mm.1	6.21549	5.40247	1.75688	0.00675825	76954	St5	suppression of tumorigenicity 5; suppression of tumorigenicity 5	NM_001001326; NM_029811; NR_037617; ENSMUST00000077909; ENSMUST00000079282; ENSMUST00000084738; ENSMUST00000168005; BC030391; BC051034; NM_001001326.1; NM_029811.2; NR_037617.1; uc009jds.1; uc009jdt.1; uc009jdu.1; uc009jdv.1; uc009jdw.1	RefSeq; ENSEMBL; GenBank; MGI/Jackson Lab; UCSC Genes	Mus musculus suppression of tumorigenicity 5 (St5), transcript variant 1, mRNA.; Mus musculus suppression of tumorigenicity 5 (St5), transcript variant 2, mRNA.; Mus musculus suppression of tumorigenicity 5 (St5), transcript variant 3, non-coding RNA.; suppression of tumorigenicity 5 [gene_biotype:protein_coding transcript_biotype:protein_coding]; Mus musculus suppression of tumorigenicity 5, mRN…	chr7	coding
TC0700004104.mm.1	5.28519	4.5372	1.67944	0.00115597	114332	Lyve1	lymphatic vessel endothelial hyaluronan receptor 1; lymphatic vessel endothelial hyaluronan receptor 1	NM_053247; ENSMUST00000033050; BC038653; BC038892; NM_053247.4; uc009jfr.1	RefSeq; ENSEMBL; GenBank; MGI/Jackson Lab; UCSC Genes	Mus musculus lymphatic vessel endothelial hyaluronan receptor 1 (Lyve1), mRNA.; lymphatic vessel endothelial hyaluronan receptor 1 [gene_biotype:protein_coding transcript_biotype:protein_coding]; Mus musculus lymphatic vessel endothelial hyaluronan receptor 1, mRNA (cDNA clone MGC:48237 IMAGE:2936961), complete cds.; Mus musculus lymphatic vessel endothelial hyaluronan receptor 1, mRNA (cDNA clon…	chr7	coding
TC0700004254.mm.1	3.55976	4.26455	-1.6299	0.0176239				NONMMUT063591	NONCODE	Non-coding transcript identified by NONCODE: Linc	chr7	ncrna
TC0700004660.mm.1	5.70638	6.39357	-1.61014	0.00449417	78388	Mvp	major vault protein; major vault protein	NM_080638; ENSMUST00000133172; ENSMUST00000165096; BC006709; NM_080638.3; OTTMUST00000061863; OTTMUST00000061864; uc009jtw.2	RefSeq; ENSEMBL; GenBank; MGI/Jackson Lab; Havana transcript; UCSC Genes	Mus musculus major vault protein (Mvp), mRNA.; major vault protein [gene_biotype:protein_coding transcript_biotype:protein_coding]; Mus musculus major vault protein, mRNA (cDNA clone MGC:7951 IMAGE:3584439), complete cds.; major vault protein ; major vault protein[gene_biotype:protein_coding transcript_biotype:protein_coding]	chr7	coding
TC0800000111.mm.1	5.08495	6.60414	-2.86629	0.0111107	50770	Atp11a	ATPase, class VI, type 11A; ATPase, class VI, type 11A	NM_015804; ENSMUST00000033818; ENSMUST00000091237; ENSMUST00000125031; ENSMUST00000127197; ENSMUST00000131804; ENSMUST00000132974; ENSMUST00000133338; ENSMUST00000136918; ENSMUST00000139545; ENSMUST00000143359; ENSMUST00000152273; BC138715; NM_015804.3; OTTMUST00000048808; OTTMUST00000048809; OTTMUST00000048810; OTTMUST00000048811; OTTMUST00000048812; OTTMUST00000048813; OTTMUST00000048814; OTTMU…	RefSeq; ENSEMBL; GenBank; MGI/Jackson Lab; Havana transcript; NONCODE; UCSC Genes	Mus musculus ATPase, class VI, type 11A (Atp11a), transcript variant 1, mRNA.; ATPase, class VI, type 11A [gene_biotype:protein_coding transcript_biotype:protein_coding]; ATPase, class VI, type 11A [gene_biotype:protein_coding transcript_biotype:retained_intron]; ATPase, class VI, type 11A [gene_biotype:protein_coding transcript_biotype:nonsense_mediated_decay]; ATPase, class VI, type 11A [gene_b…	chr8	coding
TC0800000538.mm.1	10.692	8.99306	3.24665	0.00047773	14081	Acsl1	acyl-CoA synthetase long-chain family member 1; acyl-CoA synthetase long-chain family member 1	NM_007981; ENSMUST00000034046; ENSMUST00000110371; ENSMUST00000110372; ENSMUST00000128746; ENSMUST00000130563; ENSMUST00000133161; ENSMUST00000135955; ENSMUST00000152423; BC056644; NM_007981.3; OTTMUST00000054312; OTTMUST00000054313; OTTMUST00000054314; OTTMUST00000054315; OTTMUST00000054316; OTTMUST00000054317; OTTMUST00000054318; OTTMUST00000054319; NONMMUT065483; uc009lqe.1; uc009lqf.1	RefSeq; ENSEMBL; GenBank; MGI/Jackson Lab; Havana transcript; NONCODE; UCSC Genes	Mus musculus acyl-CoA synthetase long-chain family member 1 (Acsl1), transcript variant 2, mRNA.; acyl-CoA synthetase long-chain family member 1 [gene_biotype:protein_coding transcript_biotype:protein_coding]; acyl-CoA synthetase long-chain family member 1 [gene_biotype:protein_coding transcript_biotype:retained_intron]; Mus musculus acyl-CoA synthetase long-chain family member 1, mRNA (cDNA clon…	chr8	coding
TC0800000645.mm.1	8.56982	7.94948	1.53724	0.0176972	23923	Aadat	aminoadipate aminotransferase; aminoadipate aminotransferase	NM_011834; ENSMUST00000079472; BC012637; NM_011834.2; uc009lte.1	RefSeq; ENSEMBL; GenBank; MGI/Jackson Lab; UCSC Genes	Mus musculus aminoadipate aminotransferase (Aadat), mRNA.; aminoadipate aminotransferase [gene_biotype:protein_coding transcript_biotype:protein_coding]; Mus musculus aminoadipate aminotransferase, mRNA (cDNA clone MGC:13720 IMAGE:4160508), complete cds.; aminoadipate aminotransferase	chr8	coding
TC0800000756.mm.1	5.67324	6.95149	-2.42543	0.00551362	71780	Isyna1	myo-inositol 1-phosphate synthase A1; myo-inositol 1-phosphate synthase A1	NM_023627; ENSMUST00000019283; BC003458; NM_023627.1; uc009mav.1; uc009maw.1	RefSeq; ENSEMBL; GenBank; MGI/Jackson Lab; UCSC Genes	Mus musculus myo-inositol 1-phosphate synthase A1 (Isyna1), mRNA.; myo-inositol 1-phosphate synthase A1 [gene_biotype:protein_coding transcript_biotype:protein_coding]; Mus musculus myo-inositol 1-phosphate synthase A1, mRNA (cDNA clone MGC:6809 IMAGE:2648362), complete cds.; myo-inositol 1-phosphate synthase A1	chr8	coding
TC0800000845.mm.1	7.23004	6.58612	1.56257	0.0232432	15368	Hmox1	heme oxygenase 1; heme oxygenase (decycling) 1	NM_010442; ENSMUST00000005548; ENSMUST00000159631; ENSMUST00000160341; BC010757; NM_010442.2; OTTMUST00000075866; OTTMUST00000075909; OTTMUST00000075910; NONMMUT066177; uc009mhc.2	RefSeq; ENSEMBL; GenBank; MGI/Jackson Lab; Havana transcript; NONCODE; UCSC Genes	Mus musculus heme oxygenase 1 (Hmox1), mRNA.; heme oxygenase 1 [gene_biotype:protein_coding transcript_biotype:protein_coding]; heme oxygenase 1 [gene_biotype:protein_coding transcript_biotype:retained_intron]; Mus musculus heme oxygenase (decycling) 1, mRNA (cDNA clone MGC:18463 IMAGE:4235374), complete cds.; heme oxygenase (decycling) 1 ; heme oxygenase (decycling) 1[gene_biotype:protein_coding…	chr8	coding
TC0800000910.mm.1	6.85166	6.12003	1.66052	0.0250493		Gm25138	predicted gene, 25138 [Source:MGI Symbol;Acc:MGI:5454915]	ENSMUST00000083248	ENSEMBL	predicted gene, 25138 [gene_biotype:snoRNA transcript_biotype:snoRNA]	chr8	ncrna
TC0800000982.mm.1	7.512	6.36336	2.21704	0.00633322	414077	Wdr83os	WD repeat domain 83 opposite strand	NM_001001493; BC056474; BC089623; OTTMUST00000054082; OTTMUST00000054083; OTTMUST00000054084; ENSMUST00000079764; ENSMUST00000140621; ENSMUST00000148592; NM_001001493.2; NONMMUT066444; uc009mpi.1; uc009mpj.1	RefSeq; GenBank; Havana transcript; ENSEMBL; MGI/Jackson Lab; NONCODE; UCSC Genes	Mus musculus WD repeat domain 83 opposite strand (Wdr83os), mRNA.; Mus musculus cDNA sequence BC056474, mRNA (cDNA clone MGC:67360 IMAGE:6823629), complete cds.; Mus musculus cDNA sequence BC056474, mRNA (cDNA clone MGC:107693 IMAGE:30118707), complete cds.; WD repeat domain 83 opposite strand[gene_biotype:protein_coding transcript_biotype:protein_coding]; WD repeat domain 83 opposite strand[gene…	chr8	coding
TC0800001004.mm.1	6.69878	5.72278	1.96701	0.0180153				NONMMUT066491	NONCODE	Non-coding transcript identified by NONCODE: Sense No Exonic	chr8	ncrna
TC0800001005.mm.1	6.58709	5.66646	1.89294	0.0163862				NONMMUT066493	NONCODE	Non-coding transcript identified by NONCODE: Sense No Exonic	chr8	ncrna
TC0800001191.mm.1	8.55306	7.8909	1.58245	0.0224746	102022	Ces2a	carboxylesterase 2A; carboxylesterase 2A	NM_001190330; NM_133960; ENSMUST00000034346; ENSMUST00000159303; ENSMUST00000161824; ENSMUST00000164182; BC024082; BC024491; BC024517; BC025537; BC025812; BC026643; BC031295; NM_001190330.1; NM_133960.5; OTTMUST00000067808; OTTMUST00000067810; OTTMUST00000067811; uc009nbc.2; uc012giz.1	RefSeq; ENSEMBL; GenBank; MGI/Jackson Lab; Havana transcript; UCSC Genes	Mus musculus carboxylesterase 2A (Ces2a), transcript variant 2, mRNA.; Mus musculus carboxylesterase 2A (Ces2a), transcript variant 1, mRNA.; carboxylesterase 2A [gene_biotype:protein_coding transcript_biotype:protein_coding]; carboxylesterase 2A [gene_biotype:protein_coding transcript_biotype:retained_intron]; carboxylesterase 2A [gene_biotype:protein_coding transcript_biotype:processed_transcri…	chr8	coding
TC0800001194.mm.1	6.93601	6.19901	1.66671	0.0294339	234671	Ces2c	carboxylesterase 2C; carboxylesterase 2C	NM_145603; ENSMUST00000055052; ENSMUST00000159332; ENSMUST00000160034; ENSMUST00000162970; BC015290; BC024552; BC031170; BC034178; BC034180; BC034191; NM_145603.2; OTTMUST00000067978; OTTMUST00000067979; OTTMUST00000067980; OTTMUST00000067981; NONMMUT066944; uc009nbe.2	RefSeq; ENSEMBL; GenBank; MGI/Jackson Lab; Havana transcript; NONCODE; UCSC Genes	Mus musculus carboxylesterase 2C (Ces2c), mRNA.; carboxylesterase 2C [gene_biotype:protein_coding transcript_biotype:protein_coding]; carboxylesterase 2C [gene_biotype:protein_coding transcript_biotype:processed_transcript]; Mus musculus carboxylesterase 2, mRNA (cDNA clone MGC:18908 IMAGE:4241028), complete cds.; Mus musculus carboxylesterase 2, mRNA (cDNA clone MGC:37630 IMAGE:4990820), complet…	chr8	coding
TC0800001195.mm.1	6.59701	5.98966	1.52346	0.0189129	667754	Ces2d-ps	carboxylesterase 2D, pseudogene	NR_033726; ENSMUST00000043209; uc009nbf.2	RefSeq; ENSEMBL; UCSC Genes	Mus musculus carboxylesterase 2D, pseudogene (Ces2d-ps), non-coding RNA.; carboxylesterase 2D, pseudogene [gene_biotype:protein_coding transcript_biotype:protein_coding]	chr8	ncrna
TC0800001196.mm.1	7.57242	6.89893	1.59493	0.00119061	234673	Ces2e	carboxylesterase 2E; carboxylesterase 2E	NM_001163756; NM_172759; ENSMUST00000034355; ENSMUST00000109410; BC055062; NM_001163756.1; NM_172759.3; uc009nbg.2; uc009nbh.2	RefSeq; ENSEMBL; GenBank; MGI/Jackson Lab; UCSC Genes	Mus musculus carboxylesterase 2E (Ces2e), transcript variant 2, mRNA.; Mus musculus carboxylesterase 2E (Ces2e), transcript variant 1, mRNA.; carboxylesterase 2E [gene_biotype:protein_coding transcript_biotype:protein_coding]; Mus musculus carboxylesterase 5, mRNA (cDNA clone MGC:62677 IMAGE:6528966), complete cds.; carboxylesterase 2E	chr8	coding
TC0800001258.mm.1	6.77401	6.14705	1.54431	0.00739381	21771	Cirh1a	cirrhosis, autosomal recessive 1A (human); cirrhosis, autosomal recessive 1A (human)	NM_011574; ENSMUST00000047629; BC027399; BC068113; NM_011574.2; uc009ngr.2	RefSeq; ENSEMBL; GenBank; MGI/Jackson Lab; UCSC Genes	Mus musculus cirrhosis, autosomal recessive 1A (human) (Cirh1a), mRNA.; cirrhosis, autosomal recessive 1A (human) [gene_biotype:protein_coding transcript_biotype:protein_coding]; Mus musculus cirrhosis, autosomal recessive 1A (human), mRNA (cDNA clone MGC:36990 IMAGE:4948207), complete cds.; Mus musculus cirrhosis, autosomal recessive 1A (human), mRNA (cDNA clone MGC:92952 IMAGE:5707865), complet…	chr8	coding
TC0800001358.mm.1	7.58272	8.47039	-1.85019	0.00888964	67528	Nudt7	nudix (nucleoside diphosphate linked moiety X)-type motif 7; nudix (nucleoside diphosphate linked moiety X)-type motif 7	NM_024437; NM_024446; ENSMUST00000066514; ENSMUST00000073521; ENSMUST00000109109; ENSMUST00000134593; ENSMUST00000147605; BC069843; NM_024437.3; NM_024446.4; OTTMUST00000068123; OTTMUST00000068144; OTTMUST00000068145; OTTMUST00000068146; OTTMUST00000068147; uc009nnv.2; uc009nnw.2; uc009nny.2; uc012glf.1	RefSeq; ENSEMBL; GenBank; MGI/Jackson Lab; Havana transcript; UCSC Genes	Mus musculus nudix (nucleoside diphosphate linked moiety X)-type motif 7 (Nudt7), transcript variant 1, mRNA.; Mus musculus nudix (nucleoside diphosphate linked moiety X)-type motif 7 (Nudt7), transcript variant 2, mRNA.; nudix (nucleoside diphosphate linked moiety X)-type motif 7 [gene_biotype:protein_coding transcript_biotype:protein_coding]; Mus musculus nudix (nucleoside diphosphate linked mo…	chr8	coding
TC0800001409.mm.1	3.25188	4.07711	-1.77182	0.0262068				KnowTID_00007147; NONMMUT067380; NONMMUT067381	Luo lincRNA; NONCODE	Non-coding transcript identified by Luo, et al.; Non-coding transcript identified by NONCODE: Linc	chr8	ncrna
TC0800003237.mm.1	7.01106	6.34305	1.58888	0.00242936	108148	Galnt2	UDP-N-acetyl-alpha-D-galactosamine:polypeptide N-acetylgalactosaminyltransferase 2; UDP-N-acetyl-alpha-D-galactosamine:polypeptide N-acetylgalactosaminyltransferase 2	NM_139272; ENSMUST00000034458; ENSMUST00000142547; ENSMUST00000142578; ENSMUST00000147911; BC053063; BC059818; NM_139272.2; OTTMUST00000064568; OTTMUST00000064570; OTTMUST00000064571; OTTMUST00000064572; NONMMUT067683; uc009nwz.2	RefSeq; ENSEMBL; GenBank; MGI/Jackson Lab; Havana transcript; NONCODE; UCSC Genes	Mus musculus UDP-N-acetyl-alpha-D-galactosamine:polypeptide N-acetylgalactosaminyltransferase 2 (Galnt2), mRNA.; UDP-N-acetyl-alpha-D-galactosamine:polypeptide N-acetylgalactosaminyltransferase 2 [gene_biotype:protein_coding transcript_biotype:protein_coding]; UDP-N-acetyl-alpha-D-galactosamine:polypeptide N-acetylgalactosaminyltransferase 2 [gene_biotype:protein_coding transcript_biotype:process…	chr8	coding
TC0800001472.mm.1	5.78191	6.74415	-1.94833	0.00809581	100504526	Gm20269	PREDICTED: predicted gene, 20269 (Gm20269), miscRNA.	XR_106131.1	MGI/Jackson Lab	PREDICTED: predicted gene, 20269 (Gm20269), miscRNA.	chr8	ncrna
TC0800001500.mm.1	8.60578	7.77201	1.78233	0.00265678		Gm16378	predicted gene 16378 [Source:MGI Symbol;Acc:MGI:3646886]	ENSMUST00000179168; OTTMUST00000113259	ENSEMBL; Havana transcript	predicted gene 16378 [gene_biotype:processed_pseudogene transcript_biotype:processed_pseudogene]; eukaryotic translation initiation factor 1 (Eif1) pseudogene[gene_biotype:processed_pseudogene transcript_biotype:processed_pseudogene]	chr8	ncrna
TC0800001691.mm.1	6.11099	4.67555	2.70465	0.00420713				KnowTID_00007178; NONMMUT064571; uc009kuv.1	Luo lincRNA; NONCODE; UCSC Genes	Non-coding transcript identified by Luo, et al.; Non-coding transcript identified by NONCODE: Linc; Mus musculus adult male kidney cDNA, RIKEN full-length enriched library, clone:F530212E09 product:unclassifiable, full insert sequence.	chr8	ncrna
TC0800001694.mm.1	8.18162	7.36542	1.76076	0.0410914	384783	Irs2	insulin receptor substrate 2; insulin receptor substrate 2	NM_001081212; ENSMUST00000040514; BC147580; NM_001081212.1; uc009kuz.1	RefSeq; ENSEMBL; GenBank; MGI/Jackson Lab; UCSC Genes	Mus musculus insulin receptor substrate 2 (Irs2), mRNA.; insulin receptor substrate 2 [gene_biotype:protein_coding transcript_biotype:protein_coding]; Mus musculus insulin receptor substrate 2, mRNA (cDNA clone MGC:182676 IMAGE:9056570), complete cds.; insulin receptor substrate 2	chr8	coding
TC0800001737.mm.1	6.08505	7.38647	-2.46472	0.00347183	14456	Gas6	growth arrest specific 6; growth arrest specific 6	NM_019521; ENSMUST00000033828; BC005444; NM_019521.2; uc009kya.1	RefSeq; ENSEMBL; GenBank; MGI/Jackson Lab; UCSC Genes	Mus musculus growth arrest specific 6 (Gas6), mRNA.; growth arrest specific 6 [gene_biotype:protein_coding transcript_biotype:protein_coding]; Mus musculus growth arrest specific 6, mRNA (cDNA clone MGC:6124 IMAGE:3592398), complete cds.; growth arrest specific 6	chr8	coding
TC0800001917.mm.1	6.0427	5.32102	1.6491	0.0163086	72108	Ddhd2	DDHD domain containing 2; DDHD domain containing 2	NM_028102; ENSMUST00000033975; BC118962; NM_028102.1; NONMMUT064997; uc009lgv.2; uc009lgw.2	RefSeq; ENSEMBL; GenBank; MGI/Jackson Lab; NONCODE; UCSC Genes	Mus musculus DDHD domain containing 2 (Ddhd2), mRNA.; DDHD domain containing 2 [gene_biotype:protein_coding transcript_biotype:protein_coding]; Mus musculus DDHD domain containing 2, mRNA (cDNA clone MGC:143924 IMAGE:40095026), complete cds.; DDHD domain containing 2 ; Non-coding transcript identified by NONCODE: Exonic	chr8	coding
TC0800002012.mm.1	7.11179	6.2625	1.80162	0.0145074	19663	Rbpms	RNA binding protein gene with multiple splicing; RNA binding protein gene with multiple splicing	NM_001042674; NM_001042675; NM_001286168; NM_019733; ENSMUST00000033994; ENSMUST00000033995; ENSMUST00000053251; ENSMUST00000182184; ENSMUST00000182256; ENSMUST00000182871; ENSMUST00000182926; ENSMUST00000182987; ENSMUST00000183062; ENSMUST00000183088; ENSMUST00000183122; ENSMUST00000183336; BC030397; NM_001042674.1; NM_001042675.1; NM_019733.2; OTTMUST00000114339; OTTMUST00000114340; OTTMUST0000…	RefSeq; ENSEMBL; GenBank; MGI/Jackson Lab; Havana transcript; UCSC Genes; NONCODE	Mus musculus RNA binding protein gene with multiple splicing (Rbpms), transcript variant 2, mRNA.; Mus musculus RNA binding protein gene with multiple splicing (Rbpms), transcript variant 3, mRNA.; Mus musculus RNA binding protein gene with multiple splicing (Rbpms), transcript variant 4, mRNA.; Mus musculus RNA binding protein gene with multiple splicing (Rbpms), transcript variant 1, mRNA.; RNA…	chr8	coding
TC0800002016.mm.1	6.67964	4.92312	3.37881	0.0085724				NONMMUT065169	NONCODE	Non-coding transcript identified by NONCODE: Sense No Exonic	chr8	ncrna
TC0800002017.mm.1	6.19762	4.70512	2.81375	0.0244866				NONMMUT065170	NONCODE	Non-coding transcript identified by NONCODE: Sense No Exonic	chr8	ncrna
TC0800002019.mm.1	6.3353	5.26393	2.10144	0.0231909				NONMMUT065172	NONCODE	Non-coding transcript identified by NONCODE: Sense No Exonic	chr8	ncrna
TC0800002027.mm.1	3.90011	4.51593	-1.53244	0.00549847		Gm6100	predicted gene 6100 [Source:MGI Symbol;Acc:MGI:3644987]	ENSMUST00000180253	ENSEMBL	predicted gene 6100 [gene_biotype:processed_pseudogene transcript_biotype:processed_pseudogene]	chr8	ncrna
TC0800002114.mm.1	7.03211	6.02993	2.00303	0.00228977				NONMMUT065391	NONCODE	Non-coding transcript identified by NONCODE: Sense No Exonic	chr8	ncrna
TC0800002144.mm.1	9.16321	8.50736	1.57554	0.00211927	16621; 102294	Klkb1; Cyp4v3	kallikrein B, plasma 1; cytochrome P450, family 4, subfamily v, polypeptide 3; kallikrein B, plasma 1 ; cytochrome P450, family 4, subfamily v, polypeptide 3 ; kallikrein B, plasma 1 (Klkb1), mRNA.	NM_008455; NM_133969; ENSMUST00000026907; ENSMUST00000095328; ENSMUST00000116473; BC026555; BC138967; BC138968; NM_008455.2; NM_133969.2; OTTMUST00000065425; OTTMUST00000082939; OTTMUST00000082942; uc009lot.3; uc009lou.1; uc012gdd.2	RefSeq; ENSEMBL; GenBank; MGI/Jackson Lab; Havana transcript; UCSC Genes	Mus musculus kallikrein B, plasma 1 (Klkb1), mRNA.; Mus musculus cytochrome P450, family 4, subfamily v, polypeptide 3 (Cyp4v3), mRNA.; cytochrome P450, family 4, subfamily v, polypeptide 3 [gene_biotype:protein_coding transcript_biotype:nonsense_mediated_decay]; cytochrome P450, family 4, subfamily v, polypeptide 3 [gene_biotype:protein_coding transcript_biotype:protein_coding]; kallikrein B, pl…	chr8	coding
TC0800002233.mm.1	8.00578	8.66377	-1.57788	0.0418277		Gm25813	predicted gene, 25813 [Source:MGI Symbol;Acc:MGI:5455590]	ENSMUST00000082748	ENSEMBL	predicted gene, 25813 [gene_biotype:snRNA transcript_biotype:snRNA]	chr8	ncrna
TC0800002313.mm.1	3.51599	4.39033	-1.83317	0.00730894	66234	Msmo1	methylsterol monoxygenase 1	NM_025436; ENSMUST00000034015; ENSMUST00000132013; ENSMUST00000135943; ENSMUST00000140861; ENSMUST00000141021; ENSMUST00000145216; ENSMUST00000147419; BC006802; OTTMUST00000054134; OTTMUST00000054135; OTTMUST00000054136; OTTMUST00000054137; OTTMUST00000054138; OTTMUST00000054139; OTTMUST00000074337; NM_025436.2; NONMMUT065807; uc009lux.1; uc009luy.1	RefSeq; ENSEMBL; GenBank; Havana transcript; MGI/Jackson Lab; NONCODE; UCSC Genes	Mus musculus methylsterol monoxygenase 1 (Msmo1), mRNA.; methylsterol monoxygenase 1 [gene_biotype:protein_coding transcript_biotype:protein_coding]; methylsterol monoxygenase 1 [gene_biotype:protein_coding transcript_biotype:retained_intron]; methylsterol monoxygenase 1 [gene_biotype:protein_coding transcript_biotype:processed_transcript]; Mus musculus sterol-C4-methyl oxidase-like, mRNA (cDNA c…	chr8	coding
TC0800002702.mm.1	9.41761	7.93096	2.80239	0.00196118	104158	Ces1d	carboxylesterase 1D; carboxylesterase 1D	NM_053200; ENSMUST00000034172; ENSMUST00000129987; ENSMUST00000143256; ENSMUST00000148340; BC019198; NM_053200.2; OTTMUST00000060241; OTTMUST00000060242; OTTMUST00000060243; OTTMUST00000060244; NONMMUT066711; NONMMUT066713; uc009mun.1	RefSeq; ENSEMBL; GenBank; MGI/Jackson Lab; Havana transcript; NONCODE; UCSC Genes	Mus musculus carboxylesterase 1D (Ces1d), mRNA.; carboxylesterase 1D [gene_biotype:protein_coding transcript_biotype:protein_coding]; carboxylesterase 1D [gene_biotype:protein_coding transcript_biotype:processed_transcript]; Mus musculus carboxylesterase 3, mRNA (cDNA clone MGC:29228 IMAGE:5040523), complete cds.; carboxylesterase 1D ; carboxylesterase 3[gene_biotype:protein_coding transcript_bio…	chr8	coding
TC0800002704.mm.1	7.67881	6.82529	1.8069	0.00906058	13897	Ces1e	carboxylesterase 1E; carboxylesterase 1E	NM_133660; ENSMUST00000034173; ENSMUST00000175983; ENSMUST00000176282; BC019208; NM_133660.3; OTTMUST00000060221; OTTMUST00000104233; OTTMUST00000104234; uc009muo.2	RefSeq; ENSEMBL; GenBank; MGI/Jackson Lab; Havana transcript; UCSC Genes	Mus musculus carboxylesterase 1E (Ces1e), mRNA.; carboxylesterase 1E [gene_biotype:protein_coding transcript_biotype:protein_coding]; carboxylesterase 1E [gene_biotype:protein_coding transcript_biotype:retained_intron]; Mus musculus esterase 22, mRNA (cDNA clone MGC:29420 IMAGE:5052893), complete cds.; carboxylesterase 1E ; carboxylesterase 1E[gene_biotype:protein_coding transcript_biotype:protei…	chr8	coding
TC0800002706.mm.1	8.60741	7.36778	2.36139	0.0131119	12623	Ces1g	carboxylesterase 1G; carboxylesterase 1G	NM_021456; ENSMUST00000044602; BC021150; BC026897; NM_021456.4; OTTMUST00000060226; uc009muq.2	RefSeq; ENSEMBL; GenBank; MGI/Jackson Lab; Havana transcript; UCSC Genes	Mus musculus carboxylesterase 1G (Ces1g), mRNA.; carboxylesterase 1G [gene_biotype:protein_coding transcript_biotype:protein_coding]; Mus musculus carboxylesterase 1, mRNA (cDNA clone MGC:13844 IMAGE:4163576), complete cds.; Mus musculus carboxylesterase 1, mRNA (cDNA clone MGC:18805 IMAGE:4195247), complete cds.; carboxylesterase 1G ; carboxylesterase 1[gene_biotype:protein_coding transcript_bio…	chr8	coding
TC0800002834.mm.1	3.3321	2.47117	1.81621	0.0128414				NONMMUT066980	NONCODE	Non-coding transcript identified by NONCODE: Sense No Exonic	chr8	ncrna
TC0800002836.mm.1	5.24239	4.58942	1.5724	0.00176028				NONMMUT066982	NONCODE	Non-coding transcript identified by NONCODE: Sense No Exonic	chr8	ncrna
TC0800002843.mm.1	10.2235	9.50466	1.64584	0.0152627	16816	Lcat	lecithin cholesterol acyltransferase; lecithin cholesterol acyltransferase	NM_008490; ENSMUST00000038896; BC028861; NM_008490.2; OTTMUST00000076850; uc009neq.2	RefSeq; ENSEMBL; GenBank; MGI/Jackson Lab; Havana transcript; UCSC Genes	Mus musculus lecithin cholesterol acyltransferase (Lcat), mRNA.; lecithin cholesterol acyltransferase [gene_biotype:protein_coding transcript_biotype:protein_coding]; Mus musculus lecithin cholesterol acyltransferase, mRNA (cDNA clone MGC:25630 IMAGE:4212194), complete cds.; lecithin cholesterol acyltransferase ; lecithin cholesterol acyltransferase[gene_biotype:protein_coding transcript_biotype:…	chr8	coding
TC0800002905.mm.1	11.3931	12.024	-1.54848	0.0388761	15439	Hp	haptoglobin; haptoglobin	NM_017370; ENSMUST00000074898; BC138872; NM_017370.2; uc009nin.2	RefSeq; ENSEMBL; GenBank; MGI/Jackson Lab; UCSC Genes	Mus musculus haptoglobin (Hp), mRNA.; haptoglobin [gene_biotype:protein_coding transcript_biotype:protein_coding]; Mus musculus haptoglobin, mRNA (cDNA clone MGC:170499 IMAGE:8861894), complete cds.; haptoglobin	chr8	coding
TC0800002973.mm.1	2.89186	4.8885	-3.9907	0.00417648				NONMMUT067276	NONCODE	Non-coding transcript identified by NONCODE: Linc	chr8	ncrna
TC0800002974.mm.1	3.47258	4.11395	-1.55981	0.023717				NONMMUT067277; NovelTID_00006223	NONCODE; Luo lincRNA	Non-coding transcript identified by NONCODE: Linc; Non-coding transcript identified by Luo, et al.	chr8	ncrna
TC0800003020.mm.1	4.18393	5.14966	-1.95305	1.22693e-05				NONMMUT067397; NONMMUT067398; NONMMUT067399; NONMMUT067400; NONMMUT067401; NovelTID_00006230; NovelTID_00006231; NovelTID_00006232	NONCODE; Luo lincRNA	Non-coding transcript identified by NONCODE: Linc; Non-coding transcript identified by Luo, et al.	chr8	ncrna
TC0800003064.mm.1	6.68532	5.90353	1.71927	0.00771117	100417679	Gm17709	predicted gene, 17709	ENSMUST00000168516; ENSMUST00000174536; OTTMUST00000094814	ENSEMBL; Havana transcript	predicted gene, 17709 ; predicted gene, 17709 [gene_biotype:processed_pseudogene transcript_biotype:processed_pseudogene]; ornithine decarboxylase, structural 1 (Odc1) pseudogene[gene_biotype:processed_pseudogene transcript_biotype:processed_pseudogene]	chr8	ncrna
TC0800003105.mm.1	9.4379	10.4578	-2.02776	0.0278746		n-R5s101	nuclear encoded rRNA 5S 101 [Source:MGI Symbol;Acc:MGI:4421949]	ENSMUST00000177910	ENSEMBL	nuclear encoded rRNA 5S 101 [gene_biotype:rRNA transcript_biotype:rRNA]	chr8	ncrna
TC0800003106.mm.1	9.41257	10.4311	-2.02586	0.030974		n-R5s102	nuclear encoded rRNA 5S 102 [Source:MGI Symbol;Acc:MGI:4421950]	ENSMUST00000101990	ENSEMBL	nuclear encoded rRNA 5S 102 [gene_biotype:rRNA transcript_biotype:rRNA]	chr8	ncrna
TC0800003110.mm.1	10.489	11.1137	-1.54193	0.0353857		n-R5s106	nuclear encoded rRNA 5S 106 [Source:MGI Symbol;Acc:MGI:4421954]	ENSMUST00000179060	ENSEMBL	nuclear encoded rRNA 5S 106 [gene_biotype:rRNA transcript_biotype:rRNA]	chr8	ncrna
TC0800003116.mm.1	9.60438	10.4049	-1.7417	0.041398		n-R5s112	nuclear encoded rRNA 5S 112 [Source:MGI Symbol;Acc:MGI:4421960]	ENSMUST00000178208	ENSEMBL	nuclear encoded rRNA 5S 112 [gene_biotype:rRNA transcript_biotype:rRNA]	chr8	ncrna
TC0800003118.mm.1	9.4379	10.4578	-2.02776	0.0278746		n-R5s114	nuclear encoded rRNA 5S 114 [Source:MGI Symbol;Acc:MGI:4421962]	ENSMUST00000178297	ENSEMBL	nuclear encoded rRNA 5S 114 [gene_biotype:rRNA transcript_biotype:rRNA]	chr8	ncrna
TC0800003119.mm.1	10.1971	11.0252	-1.77528	0.0369474		n-R5s115	nuclear encoded rRNA 5S 115 [Source:MGI Symbol;Acc:MGI:4421965]	ENSMUST00000179019	ENSEMBL	nuclear encoded rRNA 5S 115 [gene_biotype:rRNA transcript_biotype:rRNA]	chr8	ncrna
TC0800003122.mm.1	10.489	11.1137	-1.54193	0.0353857		n-R5s118	nuclear encoded rRNA 5S 118 [Source:MGI Symbol;Acc:MGI:4421968]	ENSMUST00000179887	ENSEMBL	nuclear encoded rRNA 5S 118 [gene_biotype:rRNA transcript_biotype:rRNA]	chr8	ncrna
TC0800003123.mm.1	9.4379	10.4578	-2.02776	0.0278746		n-R5s119	nuclear encoded rRNA 5S 119 [Source:MGI Symbol;Acc:MGI:4421971]	ENSMUST00000178861	ENSEMBL	nuclear encoded rRNA 5S 119 [gene_biotype:rRNA transcript_biotype:rRNA]	chr8	ncrna
TC0800003124.mm.1	9.60438	10.4049	-1.7417	0.041398		n-R5s120	nuclear encoded rRNA 5S 120 [Source:MGI Symbol;Acc:MGI:4421972]	ENSMUST00000180000	ENSEMBL	nuclear encoded rRNA 5S 120 [gene_biotype:rRNA transcript_biotype:rRNA]	chr8	ncrna
TC0800003129.mm.1	9.60438	10.4049	-1.7417	0.041398		n-R5s125	nuclear encoded rRNA 5S 125 [Source:MGI Symbol;Acc:MGI:4421979]	ENSMUST00000179377	ENSEMBL	nuclear encoded rRNA 5S 125 [gene_biotype:rRNA transcript_biotype:rRNA]	chr8	ncrna
TC0800003130.mm.1	10.489	11.1137	-1.54193	0.0353857		Gm24312	predicted gene, 24312 [Source:MGI Symbol;Acc:MGI:5454089]	ENSMUST00000178677	ENSEMBL	predicted gene, 24312 [gene_biotype:rRNA transcript_biotype:rRNA]	chr8	ncrna
TC0800003131.mm.1	6.70499	7.88002	-2.25799	0.0196835		n-R5s127	nuclear encoded rRNA 5S 127 [Source:MGI Symbol;Acc:MGI:4421983]	ENSMUST00000179185	ENSEMBL	nuclear encoded rRNA 5S 127 [gene_biotype:rRNA transcript_biotype:rRNA]	chr8	ncrna
TC0800003133.mm.1	9.4379	10.4578	-2.02776	0.0278746		n-R5s129	nuclear encoded rRNA 5S 129 [Source:MGI Symbol;Acc:MGI:4421985]	ENSMUST00000180122	ENSEMBL	nuclear encoded rRNA 5S 129 [gene_biotype:rRNA transcript_biotype:rRNA]	chr8	ncrna
TC0800003134.mm.1	10.489	11.1137	-1.54193	0.0353857		n-R5s130	nuclear encoded rRNA 5S 130 [Source:MGI Symbol;Acc:MGI:4421986]	ENSMUST00000178128	ENSEMBL	nuclear encoded rRNA 5S 130 [gene_biotype:rRNA transcript_biotype:rRNA]	chr8	ncrna
TC0800003135.mm.1	9.4379	10.4578	-2.02776	0.0278746		n-R5s131	nuclear encoded rRNA 5S 131 [Source:MGI Symbol;Acc:MGI:4421987]	ENSMUST00000180280	ENSEMBL	nuclear encoded rRNA 5S 131 [gene_biotype:rRNA transcript_biotype:rRNA]	chr8	ncrna
TC0800003140.mm.1	10.4003	11.2407	-1.79056	0.0428453	100861491	n-R5s136	nuclear encoded rRNA 5S 136	NR_046144.1; ENSMUST00000179080	MGI/Jackson Lab; ENSEMBL	nuclear encoded rRNA 5S 136 ; nuclear encoded rRNA 5S 136 [gene_biotype:rRNA transcript_biotype:rRNA]	chr8	ncrna
TC0800003141.mm.1	10.0847	10.9911	-1.87436	0.0317749		Gm24089	predicted gene, 24089 [Source:MGI Symbol;Acc:MGI:5453866]	ENSMUST00000093696	ENSEMBL	predicted gene, 24089 [gene_biotype:rRNA transcript_biotype:rRNA]	chr8	ncrna
TC0800003154.mm.1	10.0847	10.9911	-1.87436	0.0317749		Gm23647	predicted gene, 23647 [Source:MGI Symbol;Acc:MGI:5453424]	ENSMUST00000175042	ENSEMBL	predicted gene, 23647 [gene_biotype:rRNA transcript_biotype:rRNA]	chr8	ncrna
TC0800003165.mm.1	5.47525	4.62555	1.80213	0.014339				NONMMUT067680	NONCODE	Non-coding transcript identified by NONCODE: Linc	chr8	ncrna
TC0800003166.mm.1	7.6199	6.07074	2.92647	0.000540562				NONMMUT067681; NONMMUT067682	NONCODE	Non-coding transcript identified by NONCODE: Linc	chr8	ncrna
TC0800003193.mm.1	7.13747	6.42434	1.63936	0.0149507	270110	Irf2bp2	interferon regulatory factor 2 binding protein 2; interferon regulatory factor 2 binding protein 2	NM_001164598; ENSMUST00000054960; NM_001164598.1; OTTMUST00000117344; NONMMUT067774; NONMMUT067775; NONMMUT067776; uc009nyw.2	RefSeq; ENSEMBL; MGI/Jackson Lab; Havana transcript; NONCODE; UCSC Genes	Mus musculus interferon regulatory factor 2 binding protein 2 (Irf2bp2), mRNA.; interferon regulatory factor 2 binding protein 2 [gene_biotype:protein_coding transcript_biotype:protein_coding]; interferon regulatory factor 2 binding protein 2 ; interferon regulatory factor 2 binding protein 2[gene_biotype:protein_coding transcript_biotype:protein_coding]; Non-coding transcript identified by NONCO…	chr8	coding
TC0800003204.mm.1	4.58254	5.21546	-1.5507	0.00852845	628856	Gm9909	predicted gene 9909	BC025186; NONMMUT067804	GenBank; NONCODE	Mus musculus predicted gene, ENSMUSG00000053531, mRNA (cDNA clone MGC:32466 IMAGE:5044645), complete cds.; Non-coding transcript identified by NONCODE: Antisense	chr8	ncrna
TC0900000001.mm.1	10.3798	10.9901	-1.52654	0.0226109		Gm10718; Gm10722	predicted gene 10718 [Source:MGI Symbol;Acc:MGI:3642028]; predicted gene 10722 [Source:MGI Symbol;Acc:MGI:3642024]	ENSMUST00000099046; ENSMUST00000151376; NONMMUT067849	ENSEMBL; NONCODE	predicted gene 10718 [gene_biotype:protein_coding transcript_biotype:protein_coding]; predicted gene 10722 [gene_biotype:protein_coding transcript_biotype:protein_coding]; Non-coding transcript identified by NONCODE: Linc	chr9	ncrna
TC0900000002.mm.1	8.93271	9.60895	-1.59798	0.0217275		Gm11168	predicted gene 11168 [Source:MGI Symbol;Acc:MGI:3779420]	ENSMUST00000177722; ENSMUST00000178077; ENSMUST00000178348; ENSMUST00000179881	ENSEMBL	predicted gene 11168 [gene_biotype:protein_coding transcript_biotype:protein_coding]	chr9	ncrna
TC0900000004.mm.1	9.02082	9.7288	-1.63352	0.0365042		Gm10720	predicted gene 10720 [Source:MGI Symbol;Acc:MGI:3641687]	ENSMUST00000099050	ENSEMBL	predicted gene 10720 [gene_biotype:protein_coding transcript_biotype:protein_coding]	chr9	ncrna
TC0900000005.mm.1	8.99126	9.66851	-1.59909	0.0372642		Gm10719	predicted gene 10719 [Source:MGI Symbol;Acc:MGI:3641690]	ENSMUST00000099047; ENSMUST00000099049; ENSMUST00000179272	ENSEMBL	predicted gene 10719 [gene_biotype:protein_coding transcript_biotype:protein_coding]	chr9	ncrna
TC0900000006.mm.1	9.05847	9.68582	-1.54473	0.0264926		Gm10717	predicted gene 10717 [Source:MGI Symbol;Acc:MGI:3642031]	ENSMUST00000075573; ENSMUST00000099042; ENSMUST00000099051; ENSMUST00000099056; ENSMUST00000177601; ENSMUST00000177875; ENSMUST00000179264; ENSMUST00000179839; ENSMUST00000179982	ENSEMBL	predicted gene 10717 [gene_biotype:protein_coding transcript_biotype:protein_coding]	chr9	ncrna
TC0900000007.mm.1	9.06395	9.86525	-1.74268	0.0145058		Gm17535	predicted gene, 17535 [Source:MGI Symbol;Acc:MGI:4937169]	ENSMUST00000178641	ENSEMBL	predicted gene, 17535 [gene_biotype:protein_coding transcript_biotype:protein_coding]	chr9	ncrna
TC0900000008.mm.1	8.98733	9.80287	-1.75996	0.0232283		Gm10715	predicted gene 10715 [Source:MGI Symbol;Acc:MGI:3642376]	ENSMUST00000155807; ENSMUST00000177969	ENSEMBL	predicted gene 10715 [gene_biotype:protein_coding transcript_biotype:protein_coding]	chr9	ncrna
TC0900000023.mm.1	7.3356	6.57793	1.69077	0.0184813				uc029wxj.1	UCSC Genes	Mus musculus non-coding RNA, oocyte_clustered_small_RNA8675, complete sequence.	chr9	ncrna
TC0900000297.mm.1	5.06475	4.23781	1.77391	0.000385017				NONMMUT068524	NONCODE	Non-coding transcript identified by NONCODE: Sense No Exonic	chr9	ncrna
TC0900000458.mm.1	9.62256	9.01063	1.5283	0.00463497	15481; 100302593; 100302594; 108637	Hspa8; Snord14d; Snord14e; Snord14c	heat shock protein 8; heat shock protein 8 ; small nucleolar RNA, C/D box 14D ; small nucleolar RNA, C/D box 14E ; small nucleolar RNA, C/D box 14C	NM_031165; ENSMUST00000015800; ENSMUST00000117557; ENSMUST00000117870; ENSMUST00000127699; ENSMUST00000133964; ENSMUST00000138895; ENSMUST00000140984; ENSMUST00000149936; ENSMUST00000153847; BC006722; BC066191; BC085486; BC089322; BC089457; BC094900; BC106193; NM_031165.4; NR_028274.1; NR_028275.1; NR_028276.1; OTTMUST00000074856; OTTMUST00000074857; OTTMUST00000074858; OTTMUST00000074859; OTTMUS…	RefSeq; ENSEMBL; GenBank; MGI/Jackson Lab; Havana transcript; NONCODE; UCSC Genes	Mus musculus heat shock protein 8 (Hspa8), mRNA.; heat shock protein 8 [gene_biotype:protein_coding transcript_biotype:protein_coding]; heat shock protein 8 [gene_biotype:protein_coding transcript_biotype:retained_intron]; heat shock protein 8 [gene_biotype:protein_coding transcript_biotype:processed_transcript]; Mus musculus heat shock protein 8, mRNA (cDNA clone MGC:11684 IMAGE:3711399), comple…	chr9	coding
TC0900000600.mm.1	5.4035	4.74315	1.58047	0.0119038	100502907	Gm19447	PREDICTED: predicted gene, 19447, transcript variant 1 (Gm19447), miscRNA.; PREDICTED: predicted gene, 19447, transcript variant 2 (Gm19447), miscRNA.	XR_105233.1; XR_105234.1	MGI/Jackson Lab	PREDICTED: predicted gene, 19447, transcript variant 1 (Gm19447), miscRNA.; PREDICTED: predicted gene, 19447, transcript variant 2 (Gm19447), miscRNA.	chr9	ncrna
TC0900000666.mm.1	6.80544	6.2082	1.51282	0.00582804	235386	Hykk	hydroxylysine kinase 1; hydroxylysine kinase 1	NM_177351; ENSMUST00000039742; ENSMUST00000124295; ENSMUST00000125983; ENSMUST00000135648; BC038618; NM_177351.4; OTTMUST00000054254; OTTMUST00000054255; OTTMUST00000054256; OTTMUST00000054257; NONMMUT069201; NONMMUT069202; uc009prr.2; uc009prs.2; uc012gtp.1	RefSeq; ENSEMBL; GenBank; MGI/Jackson Lab; Havana transcript; NONCODE; UCSC Genes	Mus musculus hydroxylysine kinase 1 (Hykk), mRNA.; hydroxylysine kinase 1 [gene_biotype:protein_coding transcript_biotype:protein_coding]; hydroxylysine kinase 1 [gene_biotype:protein_coding transcript_biotype:retained_intron]; hydroxylysine kinase 1 [gene_biotype:protein_coding transcript_biotype:processed_transcript]; Mus musculus RIKEN cDNA C630028N24 gene, mRNA (cDNA clone MGC:47293 IMAGE:422…	chr9	coding
TC0900000702.mm.1	4.47246	5.76302	-2.44624	0.00492161		Gm6166	predicted gene 6166 [Source:MGI Symbol;Acc:MGI:3645893]	ENSMUST00000098689	ENSEMBL	predicted gene 6166 [gene_biotype:pseudogene transcript_biotype:pseudogene]	chr9	ncrna
TC0900000835.mm.1	9.48751	7.80453	3.21089	0.00030944	270166	Clpx	caseinolytic mitochondrial matrix peptidase chaperone subunit; caseinolytic peptidase X (E.coli) ; caseinolytic peptidase X (E.coli) (Clpx), transcript variant 2, mRNA.	NM_001044389; NM_011802; ENSMUST00000015501; ENSMUST00000113824; ENSMUST00000147279; ENSMUST00000148632; BC061153; NM_001044389.1; NM_011802.2; OTTMUST00000078915; OTTMUST00000078916; OTTMUST00000078917; uc009qda.1; uc009qdb.1; uc009qdc.1; NONMMUT069602	RefSeq; ENSEMBL; GenBank; MGI/Jackson Lab; Havana transcript; UCSC Genes; NONCODE	Mus musculus caseinolytic mitochondrial matrix peptidase chaperone subunit (Clpx), transcript variant 2, mRNA.; Mus musculus caseinolytic mitochondrial matrix peptidase chaperone subunit (Clpx), transcript variant 1, mRNA.; caseinolytic mitochondrial matrix peptidase chaperone subunit [gene_biotype:protein_coding transcript_biotype:protein_coding]; caseinolytic mitochondrial matrix peptidase chap…	chr9	coding
TC0900000836.mm.1	6.86642	4.37014	5.64231	0.000414673				NONMMUT069603	NONCODE	Non-coding transcript identified by NONCODE: Sense No Exonic	chr9	ncrna
TC0900000856.mm.1	1.1234	1.72741	-1.51994	0.0452029		Gm23248	predicted gene, 23248 [Source:MGI Symbol;Acc:MGI:5453025]	ENSMUST00000083367	ENSEMBL	predicted gene, 23248 [gene_biotype:snRNA transcript_biotype:snRNA]	chr9	ncrna
TC0900000914.mm.1	6.30876	5.43213	1.83608	0.00767247				NONMMUT069818	NONCODE	Non-coding transcript identified by NONCODE: Sense No Exonic	chr9	ncrna
TC0900000923.mm.1	4.59988	5.3191	-1.64628	0.0465577	235459	Gtf2a2	general transcription factor II A, 2; general transcription factor II A, 2 ; general transcription factor II A, 2 (Gtf2a2), mRNA.	NM_001039519; NM_001282083; NM_001282084; NR_104093; ENSMUST00000116552; ENSMUST00000118198; ENSMUST00000119413; ENSMUST00000119905; ENSMUST00000122087; ENSMUST00000126120; ENSMUST00000131078; ENSMUST00000133881; ENSMUST00000135593; ENSMUST00000140265; ENSMUST00000140305; ENSMUST00000141894; ENSMUST00000145816; ENSMUST00000148239; ENSMUST00000148889; BC028551; BC048705; NM_001039519.1; OTTMUST000…	RefSeq; ENSEMBL; GenBank; MGI/Jackson Lab; Havana transcript; UCSC Genes; NONCODE	Mus musculus general transcription factor II A, 2 (Gtf2a2), transcript variant 2, mRNA.; Mus musculus general transcription factor II A, 2 (Gtf2a2), transcript variant 1, mRNA.; Mus musculus general transcription factor II A, 2 (Gtf2a2), transcript variant 3, mRNA.; Mus musculus general transcription factor II A, 2 (Gtf2a2), transcript variant 4, non-coding RNA.; general transcription factor II A…	chr9	coding
TC0900000996.mm.1	5.16418	5.84967	-1.60825	0.0284423		n-R5s86	nuclear encoded rRNA 5S 86 [Source:MGI Symbol;Acc:MGI:4421934]	ENSMUST00000083215	ENSEMBL	nuclear encoded rRNA 5S 86 [gene_biotype:rRNA transcript_biotype:rRNA]	chr9	ncrna
TC0900001038.mm.1	9.4313	8.4922	1.91732	0.0112782	14629	Gclc	glutamate-cysteine ligase, catalytic subunit; glutamate-cysteine ligase, catalytic subunit	NM_010295; ENSMUST00000034905; BC019374; NM_010295.2; OTTMUST00000049815; uc009qtm.2	RefSeq; ENSEMBL; GenBank; MGI/Jackson Lab; Havana transcript; UCSC Genes	Mus musculus glutamate-cysteine ligase, catalytic subunit (Gclc), mRNA.; glutamate-cysteine ligase, catalytic subunit [gene_biotype:protein_coding transcript_biotype:protein_coding]; Mus musculus glutamate-cysteine ligase, catalytic subunit, mRNA (cDNA clone MGC:30487 IMAGE:4195425), complete cds.; glutamate-cysteine ligase, catalytic subunit ; glutamate-cysteine ligase catalytic subunit[gene_bio…	chr9	coding
TC0900001042.mm.1	9.84124	8.6316	2.31279	0.00910325	68801	Elovl5	ELOVL family member 5, elongation of long chain fatty acids (yeast); ELOVL family member 5, elongation of long chain fatty acids (yeast)	NM_134255; ENSMUST00000034904; ENSMUST00000133757; ENSMUST00000134072; ENSMUST00000148398; BC022911; NM_134255.3; OTTMUST00000055326; OTTMUST00000055327; OTTMUST00000055328; OTTMUST00000055329; NONMMUT070115; uc009qtn.2	RefSeq; ENSEMBL; GenBank; MGI/Jackson Lab; Havana transcript; NONCODE; UCSC Genes	Mus musculus ELOVL family member 5, elongation of long chain fatty acids (yeast) (Elovl5), mRNA.; ELOVL family member 5, elongation of long chain fatty acids (yeast) [gene_biotype:protein_coding transcript_biotype:protein_coding]; ELOVL family member 5, elongation of long chain fatty acids (yeast) [gene_biotype:protein_coding transcript_biotype:retained_intron]; Mus musculus ELOVL family member 5…	chr9	coding
TC0900001043.mm.1	4.1285	3.41391	1.64101	0.00580701				NONMMUT070116	NONCODE	Non-coding transcript identified by NONCODE: Sense No Exonic	chr9	ncrna
TC0900001048.mm.1	7.11826	6.44608	1.59347	0.049026	14860	Gsta4	glutathione S-transferase, alpha 4; glutathione S-transferase, alpha 4	NM_010357; ENSMUST00000034903; BC012639; NM_010357.3; NONMMUT070134; uc009qty.2	RefSeq; ENSEMBL; GenBank; MGI/Jackson Lab; NONCODE; UCSC Genes	Mus musculus glutathione S-transferase, alpha 4 (Gsta4), mRNA.; glutathione S-transferase, alpha 4 [gene_biotype:protein_coding transcript_biotype:protein_coding]; Mus musculus glutathione S-transferase, alpha 4, mRNA (cDNA clone MGC:13725 IMAGE:3995378), complete cds.; glutathione S-transferase, alpha 4 ; Non-coding transcript identified by NONCODE: Exonic	chr9	coding
TC0900001160.mm.1	9.76092	10.456	-1.61896	0.0243336		Gm22866	predicted gene, 22866 [Source:MGI Symbol;Acc:MGI:5452643]	ENSMUST00000083947	ENSEMBL	predicted gene, 22866 [gene_biotype:snRNA transcript_biotype:snRNA]	chr9	ncrna
TC0900001195.mm.1	9.17719	8.24746	1.90492	0.00544001	75552	Paqr9	progestin and adipoQ receptor family member IX; progestin and adipoQ receptor family member IX	NM_198414; ENSMUST00000079597; NM_198414.2; OTTMUST00000054191; NONMMUT070486; uc009rbf.1	RefSeq; ENSEMBL; MGI/Jackson Lab; Havana transcript; NONCODE; UCSC Genes	Mus musculus progestin and adipoQ receptor family member IX (Paqr9), mRNA.; progestin and adipoQ receptor family member IX [gene_biotype:protein_coding transcript_biotype:protein_coding]; progestin and adipoQ receptor family member IX ; progestin and adipoQ receptor family member IX[gene_biotype:protein_coding transcript_biotype:protein_coding]; Non-coding transcript identified by NONCODE: Exonic	chr9	coding
TC0900001196.mm.1	7.19422	6.13942	2.07743	0.0127749				KnowTID_00007565; NONMMUT070487; NONMMUT070488; NONMMUT070489	Luo lincRNA; NONCODE	Non-coding transcript identified by Luo, et al.; Non-coding transcript identified by NONCODE: Linc	chr9	ncrna
TC0900001281.mm.1	8.49612	9.59525	-2.14225	0.0235662		n-R5s88	nuclear encoded rRNA 5S 88 [Source:MGI Symbol;Acc:MGI:4421936]	ENSMUST00000083173	ENSEMBL	nuclear encoded rRNA 5S 88 [gene_biotype:rRNA transcript_biotype:rRNA]	chr9	ncrna
TC0900003334.mm.1	8.60645	7.86534	1.67146	0.000646651	102632	Acad11	acyl-Coenzyme A dehydrogenase family, member 11; acyl-Coenzyme A dehydrogenase family, member 11	NM_175324; ENSMUST00000047799; ENSMUST00000120854; ENSMUST00000128714; ENSMUST00000154431; BC045199; NM_175324.3; OTTMUST00000078584; OTTMUST00000078585; OTTMUST00000078586; OTTMUST00000078587; NONMMUT070785; uc009rhg.1	RefSeq; ENSEMBL; GenBank; MGI/Jackson Lab; Havana transcript; NONCODE; UCSC Genes	Mus musculus acyl-Coenzyme A dehydrogenase family, member 11 (Acad11), mRNA.; acyl-Coenzyme A dehydrogenase family, member 11 [gene_biotype:protein_coding transcript_biotype:protein_coding]; acyl-Coenzyme A dehydrogenase family, member 11 [gene_biotype:protein_coding transcript_biotype:processed_transcript]; Mus musculus acyl-Coenzyme A dehydrogenase family, member 11, mRNA (cDNA clone MGC:49288 …	chr9	coding
TC0900001379.mm.1	4.48547	5.23655	-1.68305	0.0168458		LOC100862215	PREDICTED: uncharacterized LOC100862215, transcript variant 1 (LOC100862215), miscRNA.; PREDICTED: uncharacterized LOC100862215, transcript variant 2 (LOC100862215), miscRNA.; PREDICTED: uncharacterized LOC100862215, transcript variant 3 (LOC100862215), miscRNA.; PREDICTED: uncharacterized LOC100862215, transcript variant 4 (LOC100862215), miscRNA.	XR_140959.1; XR_140960.1; XR_140961.1; XR_140962.1; NONMMUT070910; NONMMUT070911	MGI/Jackson Lab; NONCODE	PREDICTED: uncharacterized LOC100862215, transcript variant 1 (LOC100862215), miscRNA.; PREDICTED: uncharacterized LOC100862215, transcript variant 2 (LOC100862215), miscRNA.; PREDICTED: uncharacterized LOC100862215, transcript variant 3 (LOC100862215), miscRNA.; PREDICTED: uncharacterized LOC100862215, transcript variant 4 (LOC100862215), miscRNA.; Non-coding transcript identified by NONCODE: An…	chr9	ncrna
TC0900001418.mm.1	8.74204	7.58561	2.22906	8.36687e-05	57279	Slc25a20	solute carrier family 25 (mitochondrial carnitine/acylcarnitine translocase), member 20; solute carrier family 25 (mitochondrial carnitine/acylcarnitine translocase), member 20	NM_020520; ENSMUST00000035222; BC029733; BC052871; NM_020520.4; uc009rqs.1	RefSeq; ENSEMBL; GenBank; MGI/Jackson Lab; UCSC Genes	Mus musculus solute carrier family 25 (mitochondrial carnitine/acylcarnitine translocase), member 20 (Slc25a20), mRNA.; solute carrier family 25 (mitochondrial carnitine/acylcarnitine translocase), member 20 [gene_biotype:protein_coding transcript_biotype:protein_coding]; Mus musculus solute carrier family 25 (mitochondrial carnitine/acylcarnitine translocase), member 20, mRNA (cDNA clone MGC:257…	chr9	coding
TC0900001420.mm.1	3.73271	3.02282	1.63568	0.0245425				NONMMUT070988	NONCODE	Non-coding transcript identified by NONCODE: Sense No Exonic	chr9	ncrna
TC0900001431.mm.1	5.1261	6.12028	-1.99195	0.000136461	66940	Shisa5	shisa family member 5; shisa homolog 5 (Xenopus laevis) ; shisa homolog 5 (Xenopus laevis)	NM_001284332; NM_025858; NM_026381; ENSMUST00000026737; ENSMUST00000059097; ENSMUST00000112059; ENSMUST00000120218; ENSMUST00000120305; ENSMUST00000124432; ENSMUST00000127969; ENSMUST00000128976; ENSMUST00000135942; ENSMUST00000137282; ENSMUST00000143754; ENSMUST00000151141; ENSMUST00000152771; ENSMUST00000154113; ENSMUST00000154184; ENSMUST00000155541; BC010238; BC017600; BC057089; NM_025858.2; …	RefSeq; ENSEMBL; GenBank; MGI/Jackson Lab; Havana transcript; UCSC Genes	Mus musculus shisa family member 5 (Shisa5), transcript variant 3, mRNA.; Mus musculus shisa family member 5 (Shisa5), transcript variant 1, mRNA.; Mus musculus shisa family member 5 (Shisa5), transcript variant 2, mRNA.; shisa family member 5 [gene_biotype:protein_coding transcript_biotype:protein_coding]; shisa homolog 5 (Xenopus laevis) ; Mus musculus shisa homolog 5 (Xenopus laevis), mRNA (cD…	chr9	coding
TC0900001432.mm.1	4.82006	4.105	1.64155	0.00814194		LOC100862078	PREDICTED: uncharacterized LOC100862078 (LOC100862078), miscRNA.	XR_140967.1	MGI/Jackson Lab	PREDICTED: uncharacterized LOC100862078 (LOC100862078), miscRNA.	chr9	ncrna
TC0900001498.mm.1	4.50263	3.86764	1.55292	0.0394763				NONMMUT071163; NONMMUT071164; NONMMUT071165; NONMMUT071166; NovelTID_00006389; NovelTID_00006390; NovelTID_00006391	NONCODE; Luo lincRNA	Non-coding transcript identified by NONCODE: Linc; Non-coding transcript identified by Luo, et al.	chr9	ncrna
TC0900001576.mm.1	8.33925	7.42752	1.8813	0.0021805	113868	Acaa1a	acetyl-Coenzyme A acyltransferase 1A; acetyl-Coenzyme A acyltransferase 1A	NM_130864; ENSMUST00000039784; ENSMUST00000175719; ENSMUST00000175743; ENSMUST00000175859; ENSMUST00000176007; ENSMUST00000176351; ENSMUST00000176397; ENSMUST00000176546; ENSMUST00000176796; ENSMUST00000177463; BC012400; NM_130864.3; OTTMUST00000110753; OTTMUST00000110754; OTTMUST00000110755; OTTMUST00000110756; OTTMUST00000110757; OTTMUST00000110758; OTTMUST00000110759; OTTMUST00000110760; OTTMU…	RefSeq; ENSEMBL; GenBank; MGI/Jackson Lab; Havana transcript; UCSC Genes	Mus musculus acetyl-Coenzyme A acyltransferase 1A (Acaa1a), mRNA.; acetyl-Coenzyme A acyltransferase 1A [gene_biotype:protein_coding transcript_biotype:protein_coding]; acetyl-Coenzyme A acyltransferase 1A [gene_biotype:protein_coding transcript_biotype:retained_intron]; acetyl-Coenzyme A acyltransferase 1A [gene_biotype:protein_coding transcript_biotype:nonsense_mediated_decay]; Mus musculus ace…	chr9	coding
TC0900001680.mm.1	8.77595	9.66415	-1.85087	0.0119741		Gm26870	predicted gene, 26870 [Source:MGI Symbol;Acc:MGI:5477364]	ENSMUST00000181242; ENSMUST00000181572; ENSMUST00000181957; NONMMUT067850; NONMMUT067851; NONMMUT067852; NONMMUT067853; NONMMUT067854; NONMMUT067855; NONMMUT067856; NONMMUT067857; NONMMUT067858; NONMMUT067859; NONMMUT067860; NONMMUT067861; NONMMUT067862; NONMMUT067863; NONMMUT067864; NONMMUT067865; NONMMUT067866	ENSEMBL; NONCODE	predicted gene, 26870 [gene_biotype:lincRNA transcript_biotype:lincRNA]; Non-coding transcript identified by NONCODE: Linc	chr9	ncrna
TC0900001902.mm.1	3.04131	3.86338	-1.76795	0.0193697	69862	1810064F22Rik	RIKEN cDNA 1810064F22 gene; RIKEN cDNA 1810064F22 gene	NR_027981; BC147375; NR_027981.1; ENSMUST00000167359; NONMMUT068336; uc009ooe.1	RefSeq; GenBank; MGI/Jackson Lab; ENSEMBL; NONCODE; UCSC Genes	Mus musculus RIKEN cDNA 1810064F22 gene (1810064F22Rik), long non-coding RNA.; Mus musculus RIKEN cDNA 1810064F22 gene, mRNA (cDNA clone MGC:182536 IMAGE:9056430), complete cds.; RIKEN cDNA 1810064F22 gene ; RIKEN cDNA 1810064F22 gene [gene_biotype:antisense transcript_biotype:antisense]; Non-coding transcript identified by NONCODE: Linc	chr9	ncrna
TC0900002006.mm.1	8.42898	7.41859	2.01445	0.0145535				NONMMUT068562	NONCODE	Non-coding transcript identified by NONCODE: Sense No Exonic	chr9	ncrna
TC0900002103.mm.1	6.83968	6.22142	1.53503	0.000412753		LOC100862227	PREDICTED: uncharacterized LOC100862227, transcript variant 1 (LOC100862227), miscRNA.; PREDICTED: uncharacterized LOC100862227, transcript variant 2 (LOC100862227), miscRNA.; PREDICTED: uncharacterized LOC100862227, transcript variant 3 (LOC100862227), miscRNA.	XR_140932.1; XR_140933.1; XR_140934.1	MGI/Jackson Lab	PREDICTED: uncharacterized LOC100862227, transcript variant 1 (LOC100862227), miscRNA.; PREDICTED: uncharacterized LOC100862227, transcript variant 2 (LOC100862227), miscRNA.; PREDICTED: uncharacterized LOC100862227, transcript variant 3 (LOC100862227), miscRNA.	chr9	ncrna
TC0900002307.mm.1	9.54725	8.72074	1.77339	0.000855305	110446	Acat1	acetyl-Coenzyme A acetyltransferase 1; acetyl-Coenzyme A acetyltransferase 1	NM_144784; ENSMUST00000034547; ENSMUST00000167130; ENSMUST00000169317; BC024763; NM_144784.3; OTTMUST00000094019; OTTMUST00000094020; OTTMUST00000094021; NONMMUT069149; uc009pmg.1	RefSeq; ENSEMBL; GenBank; MGI/Jackson Lab; Havana transcript; NONCODE; UCSC Genes	Mus musculus acetyl-Coenzyme A acetyltransferase 1 (Acat1), mRNA.; acetyl-Coenzyme A acetyltransferase 1 [gene_biotype:protein_coding transcript_biotype:protein_coding]; acetyl-Coenzyme A acetyltransferase 1 [gene_biotype:protein_coding transcript_biotype:retained_intron]; acetyl-Coenzyme A acetyltransferase 1 [gene_biotype:protein_coding transcript_biotype:processed_transcript]; Mus musculus ace…	chr9	coding
TC0900002447.mm.1	2.3954	4.42665	-4.0876	0.0090586				NONMMUT069456; NovelTID_00006478	NONCODE; Luo lincRNA	Non-coding transcript identified by NONCODE: Linc; Non-coding transcript identified by Luo, et al.	chr9	ncrna
TC0900002503.mm.1	8.1102	7.48064	1.54709	0.00257188	57874	Hacd3	3-hydroxyacyl-CoA dehydratase 3	NM_021345; ENSMUST00000036615; BC031755; BC057023; NM_021345.2; uc009qcp.2	RefSeq; ENSEMBL; GenBank; MGI/Jackson Lab; UCSC Genes	Mus musculus 3-hydroxyacyl-CoA dehydratase 3 (Hacd3), mRNA.; 3-hydroxyacyl-CoA dehydratase 3 [gene_biotype:protein_coding transcript_biotype:protein_coding]; Mus musculus protein tyrosine phosphatase-like A domain containing 1, mRNA (cDNA clone MGC:25483 IMAGE:4488391), complete cds.; Mus musculus protein tyrosine phosphatase-like A domain containing 1, mRNA (cDNA clone MGC:67176 IMAGE:6813640), …	chr9	coding
TC0900002568.mm.1	7.4797	6.71565	1.69826	0.0204363				uc029xej.1	UCSC Genes	Mus musculus non-coding RNA, oocyte_piRNA1665, complete sequence.	chr9	ncrna
TC0900002569.mm.1	8.11118	8.75287	-1.56015	0.0404055		Gm22169	predicted gene, 22169 [Source:MGI Symbol;Acc:MGI:5451946]	ENSMUST00000083229	ENSEMBL	predicted gene, 22169 [gene_biotype:snRNA transcript_biotype:snRNA]	chr9	ncrna
TC0900002577.mm.1	3.24132	2.08679	2.22611	0.0439455				uc029xel.1	UCSC Genes	Mus musculus non-coding RNA, oocyte_clustered_small_RNA13617, complete sequence.	chr9	ncrna
TC0900002709.mm.1	3.46183	2.61855	1.79413	0.0431905				NONMMUT070109; NONMMUT070110; NONMMUT070111; NovelTID_00006516; NovelTID_00006517; NovelTID_00006518; NovelTID_00006519	NONCODE; Luo lincRNA	Non-coding transcript identified by NONCODE: Linc; Non-coding transcript identified by Luo, et al.	chr9	ncrna
TC0900002710.mm.1	6.60222	4.17608	5.37455	0.00667966				NONMMUT070113	NONCODE	Non-coding transcript identified by NONCODE: Linc	chr9	ncrna
TC0900002718.mm.1	3.94154	3.11586	1.77237	0.0288968		Gm8074	predicted gene 8074 [Source:MGI Symbol;Acc:MGI:3643195]	ENSMUST00000095071	ENSEMBL	predicted gene 8074 [gene_biotype:protein_coding transcript_biotype:protein_coding]	chr9	ncrna
TC0900002719.mm.1	5.85886	4.63053	2.34296	0.0223154	14858	Gsta2	glutathione S-transferase, alpha 2 (Yc2); glutathione S-transferase, alpha 2 (Yc2)	NM_008182; ENSMUST00000034902; ENSMUST00000125479; ENSMUST00000129247; ENSMUST00000140498; BC061133; NM_008182.3; OTTMUST00000047147; OTTMUST00000047148; OTTMUST00000047149; OTTMUST00000047150; NONMMUT070137; uc009quf.1	RefSeq; ENSEMBL; GenBank; MGI/Jackson Lab; Havana transcript; NONCODE; UCSC Genes	Mus musculus glutathione S-transferase, alpha 2 (Yc2) (Gsta2), mRNA.; glutathione S-transferase, alpha 2 (Yc2) [gene_biotype:protein_coding transcript_biotype:protein_coding]; glutathione S-transferase, alpha 2 (Yc2) [gene_biotype:protein_coding transcript_biotype:processed_transcript]; Mus musculus glutathione S-transferase, alpha 2 (Yc2), mRNA (cDNA clone MGC:74263 IMAGE:30303519), complete cds…	chr9	coding
TC0900002780.mm.1	7.99072	7.00407	1.98158	0.0424975	17436	Me1	malic enzyme 1, NADP(+)-dependent, cytosolic; malic enzyme 1, NADP(+)-dependent, cytosolic	NM_001198933; NM_008615; ENSMUST00000034989; BC003287; BC011081; BC080660; BC094028; NM_001198933.1; NM_008615.2; uc009qxr.2; uc009qxs.2; uc012gxt.1	RefSeq; ENSEMBL; GenBank; MGI/Jackson Lab; UCSC Genes	Mus musculus malic enzyme 1, NADP(+)-dependent, cytosolic (Me1), transcript variant 2, mRNA.; Mus musculus malic enzyme 1, NADP(+)-dependent, cytosolic (Me1), transcript variant 1, mRNA.; malic enzyme 1, NADP(+)-dependent, cytosolic [gene_biotype:protein_coding transcript_biotype:protein_coding]; Mus musculus malic enzyme 1, NADP(+)-dependent, cytosolic, mRNA (cDNA clone MGC:6178 IMAGE:3582779), …	chr9	coding
TC0900003041.mm.1	4.55827	5.2506	-1.61589	0.0181812	14685	Gnat1	guanine nucleotide binding protein, alpha transducing 1; guanine nucleotide binding protein, alpha transducing 1	NM_008140; ENSMUST00000010205; BC022793; BC051412; BC058810; NM_008140.2; uc009rmr.1	RefSeq; ENSEMBL; GenBank; MGI/Jackson Lab; UCSC Genes	Mus musculus guanine nucleotide binding protein, alpha transducing 1 (Gnat1), mRNA.; guanine nucleotide binding protein, alpha transducing 1 [gene_biotype:protein_coding transcript_biotype:protein_coding]; Mus musculus guanine nucleotide binding protein, alpha transducing 1, mRNA (cDNA clone MGC:27622 IMAGE:4505478), complete cds.; Mus musculus guanine nucleotide binding protein, alpha transducin…	chr9	coding
TC0900003122.mm.1	7.95	7.06385	1.84824	0.0146719	235636	Rtp3	receptor transporter protein 3; receptor transporter protein 3	NM_153100; ENSMUST00000084922; BC112903; BC150678; NM_153100.2; uc012hbo.1; uc012hbp.1	RefSeq; ENSEMBL; GenBank; MGI/Jackson Lab; UCSC Genes	Mus musculus receptor transporter protein 3 (Rtp3), mRNA.; receptor transporter protein 3 [gene_biotype:protein_coding transcript_biotype:protein_coding]; Mus musculus receptor transporter protein 3, mRNA (cDNA clone MGC:118000 IMAGE:4196964), complete cds.; Mus musculus receptor transporter protein 3, mRNA (cDNA clone MGC:183589 IMAGE:9087589), complete cds.; receptor transporter protein 3	chr9	coding
TC0900003182.mm.1	8.03819	7.25381	1.72235	0.00723731	68292	Stt3b	STT3, subunit of the oligosaccharyltransferase complex, homolog B (S. cerevisiae); STT3, subunit of the oligosaccharyltransferase complex, homolog B (S. cerevisiae)	NM_024222; ENSMUST00000035010; BC052433; NM_024222.2; uc009ryp.1	RefSeq; ENSEMBL; GenBank; MGI/Jackson Lab; UCSC Genes	Mus musculus STT3, subunit of the oligosaccharyltransferase complex, homolog B (S. cerevisiae) (Stt3b), mRNA.; STT3, subunit of the oligosaccharyltransferase complex, homolog B (S. cerevisiae) [gene_biotype:protein_coding transcript_biotype:protein_coding]; Mus musculus STT3, subunit of the oligosaccharyltransferase complex, homolog B (S. cerevisiae), mRNA (cDNA clone MGC:64679 IMAGE:6837097), co…	chr9	coding
TC0900003184.mm.1	3.93907	3.19778	1.67167	0.0105165				NONMMUT071230	NONCODE	Non-coding transcript identified by NONCODE: Sense No Exonic	chr9	ncrna
TC0900003187.mm.1	3.36137	2.41412	1.9282	0.00448503				NONMMUT071233	NONCODE	Non-coding transcript identified by NONCODE: Sense No Exonic	chr9	ncrna
TC0900003191.mm.1	4.74548	5.38877	-1.56188	0.0414255		n-R5s92	nuclear encoded rRNA 5S 92 [Source:MGI Symbol;Acc:MGI:4421940]	ENSMUST00000082810	ENSEMBL	nuclear encoded rRNA 5S 92 [gene_biotype:rRNA transcript_biotype:rRNA]	chr9	ncrna
TC0900003229.mm.1	9.607	8.72964	1.83701	0.00188022		Gm4017; Gm10157	predicted gene 4017 [Source:MGI Symbol;Acc:MGI:3782191]; predicted gene 10157 [Source:MGI Symbol;Acc:MGI:3642264]	ENSMUST00000084813; ENSMUST00000139408; OTTMUST00000083596	ENSEMBL; Havana transcript	predicted gene 4017 [gene_biotype:processed_pseudogene transcript_biotype:processed_pseudogene]; predicted gene 10157 [gene_biotype:processed_pseudogene transcript_biotype:processed_pseudogene]; eukaryotic translation initiation factor 1 (Eif1) pseudogene[gene_biotype:processed_pseudogene transcript_biotype:processed_pseudogene]	chr9	ncrna
TC0900003234.mm.1	9.91349	8.39247	2.86995	0.00339721	235674	Acaa1b	acetyl-Coenzyme A acyltransferase 1B; acetyl-Coenzyme A acyltransferase 1B	NM_146230; ENSMUST00000010795; ENSMUST00000127952; BC019882; NM_146230.3; OTTMUST00000084360; OTTMUST00000084361; uc009saj.1	RefSeq; ENSEMBL; GenBank; MGI/Jackson Lab; Havana transcript; UCSC Genes	Mus musculus acetyl-Coenzyme A acyltransferase 1B (Acaa1b), mRNA.; acetyl-Coenzyme A acyltransferase 1B [gene_biotype:protein_coding transcript_biotype:protein_coding]; acetyl-Coenzyme A acyltransferase 1B [gene_biotype:protein_coding transcript_biotype:retained_intron]; Mus musculus acetyl-Coenzyme A acyltransferase 1B, mRNA (cDNA clone MGC:29978 IMAGE:5123887), complete cds.; acetyl-Coenzyme A …	chr9	coding
TC0900003244.mm.1	3.92768	4.54923	-1.53853	0.000335994	20271	Scn5a	sodium channel, voltage-gated, type V, alpha; Synthetic construct Mus musculus clone IMAGE:100069451, MGC:199353 sodium channel, voltage-gated, type V, alpha (Scn5a) mRNA, encodes complete protein.; sodium channel, voltage-gated, type V, alpha	NM_001253860; NM_021544; ENSMUST00000065196; ENSMUST00000117911; ENSMUST00000120420; ENSMUST00000138934; BC172643; NM_001253860.1; NM_021544.4; OTTMUST00000078927; OTTMUST00000078928; OTTMUST00000078929; uc009sbc.2; uc009sbd.1; uc009sbe.2; uc012hcm.1	RefSeq; ENSEMBL; GenBank; MGI/Jackson Lab; Havana transcript; UCSC Genes	Mus musculus sodium channel, voltage-gated, type V, alpha (Scn5a), transcript variant 2, mRNA.; Mus musculus sodium channel, voltage-gated, type V, alpha (Scn5a), transcript variant 1, mRNA.; sodium channel, voltage-gated, type V, alpha [gene_biotype:protein_coding transcript_biotype:protein_coding]; Synthetic construct Mus musculus clone IMAGE:100069451, MGC:199353 sodium channel, voltage-gated,…	chr9	coding
TC0900003276.mm.1	9.98822	8.15878	3.55399	0.00785468	13124	Cyp8b1	cytochrome P450, family 8, subfamily b, polypeptide 1; cytochrome P450, family 8, subfamily b, polypeptide 1	NM_010012; ENSMUST00000062474; BC010973; BC010974; BC049969; NM_010012.3; OTTMUST00000055272; uc009sef.2	RefSeq; ENSEMBL; GenBank; MGI/Jackson Lab; Havana transcript; UCSC Genes	Mus musculus cytochrome P450, family 8, subfamily b, polypeptide 1 (Cyp8b1), mRNA.; cytochrome P450, family 8, subfamily b, polypeptide 1 [gene_biotype:protein_coding transcript_biotype:protein_coding]; Mus musculus cytochrome P450, family 8, subfamily b, polypeptide 1, mRNA (cDNA clone MGC:13797 IMAGE:4161038), complete cds.; Mus musculus cytochrome P450, family 8, subfamily b, polypeptide 1, mR…	chr9	coding
TC0X00000176.mm.1	5.8189	5.08948	1.65797	0.004815		Gm14519	predicted gene 14519 [Source:MGI Symbol;Acc:MGI:3646740]	ENSMUST00000118490; OTTMUST00000041118	ENSEMBL; Havana transcript	predicted gene 14519 [gene_biotype:processed_pseudogene transcript_biotype:processed_pseudogene]; B-cell translocation gene 1, anti-proliferative (Btg1) pseudogene[gene_biotype:processed_pseudogene transcript_biotype:processed_pseudogene]	chrX	ncrna
TC0X00000316.mm.1	5.94842	7.10459	-2.22865	0.0308439	16164	Il13ra1	interleukin 13 receptor, alpha 1; interleukin 13 receptor, alpha 1	NM_133990; ENSMUST00000033418; BC052425; BC059939; NM_133990.4; OTTMUST00000041683; uc009sxj.1	RefSeq; ENSEMBL; GenBank; MGI/Jackson Lab; Havana transcript; UCSC Genes	Mus musculus interleukin 13 receptor, alpha 1 (Il13ra1), mRNA.; interleukin 13 receptor, alpha 1 [gene_biotype:protein_coding transcript_biotype:protein_coding]; Mus musculus interleukin 13 receptor, alpha 1, mRNA (cDNA clone MGC:63442 IMAGE:6835500), complete cds.; Mus musculus interleukin 13 receptor, alpha 1, mRNA (cDNA clone MGC:67822 IMAGE:6477224), complete cds.; interleukin 13 receptor, al…	chrX	coding
TC0X00000319.mm.1	3.97126	3.20834	1.69692	0.00260121	74365	Lonrf3	LON peptidase N-terminal domain and ring finger 3; LON peptidase N-terminal domain and ring finger 3	NM_028894; ENSMUST00000016383; ENSMUST00000126147; ENSMUST00000135758; BC120688; BC120690; NM_028894.1; OTTMUST00000041737; OTTMUST00000041738; OTTMUST00000041739; ENSMUST00000122667; NONMMUT072126; uc009sxm.1; uc009sxn.1	RefSeq; ENSEMBL; GenBank; MGI/Jackson Lab; Havana transcript; NONCODE; UCSC Genes	Mus musculus LON peptidase N-terminal domain and ring finger 3 (Lonrf3), mRNA.; LON peptidase N-terminal domain and ring finger 3 [gene_biotype:protein_coding transcript_biotype:protein_coding]; LON peptidase N-terminal domain and ring finger 3 [gene_biotype:protein_coding transcript_biotype:retained_intron]; Mus musculus LON peptidase N-terminal domain and ring finger 3, mRNA (cDNA clone MGC:155…	chrX	coding
TC0X00000570.mm.1	9.24944	9.93862	-1.61238	0.047966		Gm25412	predicted gene, 25412 [Source:MGI Symbol;Acc:MGI:5455189]	ENSMUST00000180258	ENSEMBL	predicted gene, 25412 [gene_biotype:snRNA transcript_biotype:snRNA]	chrX	ncrna
TC0X00000668.mm.1	4.68185	5.78226	-2.14416	0.00831368	18194	Nsdhl	NAD(P) dependent steroid dehydrogenase-like; NAD(P) dependent steroid dehydrogenase-like	NM_010941; ENSMUST00000033715; ENSMUST00000155663; BC019945; BC052834; NM_010941.3; OTTMUST00000043187; OTTMUST00000043188; NONMMUT072780; uc009tkv.1	RefSeq; ENSEMBL; GenBank; MGI/Jackson Lab; Havana transcript; NONCODE; UCSC Genes	Mus musculus NAD(P) dependent steroid dehydrogenase-like (Nsdhl), mRNA.; NAD(P) dependent steroid dehydrogenase-like [gene_biotype:protein_coding transcript_biotype:protein_coding]; NAD(P) dependent steroid dehydrogenase-like [gene_biotype:protein_coding transcript_biotype:retained_intron]; Mus musculus NAD(P) dependent steroid dehydrogenase-like, mRNA (cDNA clone MGC:28204 IMAGE:3989811), comple…	chrX	coding
TC0X00000929.mm.1	4.59738	4.00758	1.50503	0.0208772	11835	Ar	androgen receptor; Synthetic construct Mus musculus clone IMAGE:100016477, MGC:184490 androgen receptor (Ar) mRNA, encodes complete protein.; androgen receptor	NM_013476; ENSMUST00000052837; BC153098; NM_013476.3; OTTMUST00000043610; NONMMUT073270; NONMMUT073271; NONMMUT073272; uc009tuv.1; uc009tuw.1	RefSeq; ENSEMBL; GenBank; MGI/Jackson Lab; Havana transcript; NONCODE; UCSC Genes	Mus musculus androgen receptor (Ar), mRNA.; androgen receptor [gene_biotype:protein_coding transcript_biotype:protein_coding]; Synthetic construct Mus musculus clone IMAGE:100016477, MGC:184490 androgen receptor (Ar) mRNA, encodes complete protein.; androgen receptor ; androgen receptor[gene_biotype:protein_coding transcript_biotype:protein_coding]; Non-coding transcript identified by NONCODE: Li…	chrX	coding
TC0X00001058.mm.1	7.5378	6.38868	2.21778	0.00306863	668458	Rab9b-ps1	RAB9B, member RAS oncogene family, pseudogene 1 ; RAB9B, member RAS oncogene family, pseudogene 1	ENSMUST00000178273; OTTMUST00000043685; ENSMUST00000119785	ENSEMBL; Havana transcript	RAB9B, member RAS oncogene family, pseudogene 1 ; novel pseudogene similar to Ras-related protein Rab-9A Rab9a[gene_biotype:processed_pseudogene transcript_biotype:processed_pseudogene]; RAB9B, member RAS oncogene family, pseudogene 1 [gene_biotype:processed_pseudogene transcript_biotype:processed_pseudogene]	chrX	ncrna
TC0X00001157.mm.1	6.07759	6.86278	-1.72332	0.0287972		Gm24624	predicted gene, 24624 [Source:MGI Symbol;Acc:MGI:5454401]	ENSMUST00000082617	ENSEMBL	predicted gene, 24624 [gene_biotype:snRNA transcript_biotype:snRNA]	chrX	ncrna
TC0X00001177.mm.1	6.43832	5.79945	1.5571	0.0308103		Gm14928	predicted gene 14928 [Source:MGI Symbol;Acc:MGI:3648477]	ENSMUST00000120198; OTTMUST00000044622	ENSEMBL; Havana transcript	predicted gene 14928 [gene_biotype:processed_pseudogene transcript_biotype:processed_pseudogene]; ornithine decarboxylase structural 1 (Odc1) pseudogene[gene_biotype:processed_pseudogene transcript_biotype:processed_pseudogene]	chrX	ncrna
TC0X00001192.mm.1	4.5742	5.16294	-1.50393	0.0090918	245575	Gm4992	predicted pseudogene 4992	ENSMUST00000101267; ENSMUST00000120256; OTTMUST00000044728	ENSEMBL; Havana transcript	predicted pseudogene 4992 ; predicted pseudogene 4992 [gene_biotype:processed_pseudogene transcript_biotype:processed_pseudogene]; Novel pseudogene[gene_biotype:processed_pseudogene transcript_biotype:processed_pseudogene]	chrX	ncrna
TC0X00001307.mm.1	5.08185	4.26767	1.7583	0.00437188				NONMMUT073942	NONCODE	Non-coding transcript identified by NONCODE: Sense No Exonic	chrX	ncrna
TC0X00001327.mm.1	8.17675	7.59054	1.5013	0.00821954		Gm7973	predicted gene 7973 [Source:MGI Symbol;Acc:MGI:3647336]	ENSMUST00000122107; NONMMUT073989; OTTMUST00000044975	ENSEMBL; NONCODE; Havana transcript	predicted gene 7973 [gene_biotype:processed_pseudogene transcript_biotype:processed_pseudogene]; Non-coding transcript identified by NONCODE: Linc; basic transcription factor 3 (Btf3) pseudogene[gene_biotype:processed_pseudogene transcript_biotype:processed_pseudogene]	chrX	ncrna
TC0X00001524.mm.1	6.01018	6.89391	-1.84515	0.0403025		n-R5s13	nuclear encoded rRNA 5S 13 [Source:MGI Symbol;Acc:MGI:4421747]	ENSMUST00000093707	ENSEMBL	nuclear encoded rRNA 5S 13 [gene_biotype:rRNA transcript_biotype:rRNA]	chrX	ncrna
TC0X00001561.mm.1	7.38733	6.63953	1.67923	0.0207569				uc029xns.1	UCSC Genes	Mus musculus non-coding RNA, oocyte_clustered_small_RNA8675, complete sequence.	chrX	ncrna
TC0X00001633.mm.1	3.11419	2.38449	1.6583	0.0110328	237175	Adgrg2	adhesion G protein-coupled receptor G2	NM_001079847; NM_001079848; NM_001079857; NM_178712; ENSMUST00000112398; ENSMUST00000112400; ENSMUST00000112401; ENSMUST00000112402; ENSMUST00000112404; ENSMUST00000112405; ENSMUST00000112408; ENSMUST00000123450; ENSMUST00000146805; BC115874; BC116644; NM_001079847.1; NM_001079848.1; NM_001079857.1; NM_178712.3; NONMMUT074545; OTTMUST00000046776; OTTMUST00000046777; OTTMUST00000046778; OTTMUST000…	RefSeq; ENSEMBL; GenBank; MGI/Jackson Lab; NONCODE; Havana transcript; UCSC Genes	Mus musculus adhesion G protein-coupled receptor G2 (Adgrg2), transcript variant 3, mRNA.; Mus musculus adhesion G protein-coupled receptor G2 (Adgrg2), transcript variant 4, mRNA.; Mus musculus adhesion G protein-coupled receptor G2 (Adgrg2), transcript variant 2, mRNA.; Mus musculus adhesion G protein-coupled receptor G2 (Adgrg2), transcript variant 1, mRNA.; adhesion G protein-coupled receptor…	chrX	coding
TC0X00001804.mm.1	5.4393	6.24839	-1.75211	0.0356969				uc029xia.1	UCSC Genes	Mus musculus non-coding RNA, oocyte_clustered_small_RNA9317, complete sequence.	chrX	ncrna
TC0X00001866.mm.1	5.60887	6.5163	-1.87571	0.0378273		n-R5s3	nuclear encoded rRNA 5S 3 [Source:MGI Symbol;Acc:MGI:4421737]	ENSMUST00000083879	ENSEMBL	nuclear encoded rRNA 5S 3 [gene_biotype:rRNA transcript_biotype:rRNA]	chrX	ncrna
TC0X00001892.mm.1	7.98888	7.27736	1.63753	0.00256494	109731	Maob	monoamine oxidase B; monoamine oxidase B	NM_172778; ENSMUST00000040820; ENSMUST00000163344; ENSMUST00000168613; ENSMUST00000173143; BC113182; BC113788; NM_172778.2; OTTMUST00000041060; OTTMUST00000092869; OTTMUST00000092870; OTTMUST00000092871; uc009ssb.2	RefSeq; ENSEMBL; GenBank; MGI/Jackson Lab; Havana transcript; UCSC Genes	Mus musculus monoamine oxidase B (Maob), mRNA.; monoamine oxidase B [gene_biotype:protein_coding transcript_biotype:protein_coding]; monoamine oxidase B [gene_biotype:protein_coding transcript_biotype:nonsense_mediated_decay]; Mus musculus monoamine oxidase B, mRNA (cDNA clone MGC:132955 IMAGE:40061991), complete cds.; Mus musculus monoamine oxidase B, mRNA (cDNA clone MGC:132954 IMAGE:40061990),…	chrX	coding
TC0X00001907.mm.1	6.35071	7.16694	-1.76081	0.0418901		n-R5s5	nuclear encoded rRNA 5S 5 [Source:MGI Symbol;Acc:MGI:4421739]	ENSMUST00000083134	ENSEMBL	nuclear encoded rRNA 5S 5 [gene_biotype:rRNA transcript_biotype:rRNA]	chrX	ncrna
TC0X00001928.mm.1	3.56021	4.18512	-1.54211	0.0389895		Gm26065	predicted gene, 26065 [Source:MGI Symbol;Acc:MGI:5455842]	ENSMUST00000083380	ENSEMBL	predicted gene, 26065 [gene_biotype:snRNA transcript_biotype:snRNA]	chrX	ncrna
TC0X00002208.mm.1	4.78415	4.08746	1.62078	0.0124193				NONMMUT072428	NONCODE	Non-coding transcript identified by NONCODE: Sense No Exonic	chrX	ncrna
TC0X00002316.mm.1	3.23859	4.31828	-2.11358	0.00142429		Gm8163	predicted gene 8163 [Source:MGI Symbol;Acc:MGI:3644711]	ENSMUST00000122020; OTTMUST00000042736	ENSEMBL; Havana transcript	predicted gene 8163 [gene_biotype:processed_pseudogene transcript_biotype:processed_pseudogene]; farnesyl diphosphate synthetase (Fdps) pseudogene[gene_biotype:processed_pseudogene transcript_biotype:processed_pseudogene]	chrX	ncrna
TC0X00002472.mm.1	6.02232	5.39856	1.54088	0.0141895	14069	F8	coagulation factor VIII; coagulation factor VIII	NM_001161373; NM_001161374; NM_007977; ENSMUST00000033539; ENSMUST00000114085; ENSMUST00000147349; ENSMUST00000151772; BC138347; BC145245; NM_001161373.1; NM_001161374.1; NM_007977.2; OTTMUST00000049293; OTTMUST00000049294; OTTMUST00000049295; uc009tpt.3; uc012hlb.2; uc012hlc.2	RefSeq; ENSEMBL; GenBank; MGI/Jackson Lab; Havana transcript; UCSC Genes	Mus musculus coagulation factor VIII (F8), transcript variant 2, mRNA.; Mus musculus coagulation factor VIII (F8), transcript variant 3, mRNA.; Mus musculus coagulation factor VIII (F8), transcript variant 1, mRNA.; coagulation factor VIII [gene_biotype:protein_coding transcript_biotype:protein_coding]; Mus musculus coagulation factor VIII, mRNA (cDNA clone MGC:169972 IMAGE:8861367), complete cds…	chrX	coding
TC0X00002556.mm.1	7.47083	6.72099	1.6816	0.0019605	14933	Gk	glycerol kinase	NM_008194; NM_212444; ENSMUST00000026039; ENSMUST00000113978; ENSMUST00000122950; ENSMUST00000124386; ENSMUST00000125081; ENSMUST00000142152; ENSMUST00000152221; ENSMUST00000156390; BC003767; OTTMUST00000043302; OTTMUST00000043303; OTTMUST00000043304; OTTMUST00000043305; OTTMUST00000043306; OTTMUST00000043307; OTTMUST00000043308; OTTMUST00000043309; NM_008194.3; NM_212444.2; NONMMUT073063; NONMMU…	RefSeq; ENSEMBL; GenBank; Havana transcript; MGI/Jackson Lab; NONCODE; UCSC Genes	Mus musculus glycerol kinase (Gk), transcript variant 1, mRNA.; Mus musculus glycerol kinase (Gk), transcript variant 2, mRNA.; glycerol kinase [gene_biotype:protein_coding transcript_biotype:protein_coding]; glycerol kinase [gene_biotype:protein_coding transcript_biotype:retained_intron]; glycerol kinase [gene_biotype:protein_coding transcript_biotype:processed_transcript]; Mus musculus glycerol…	chrX	coding
TC0X00002558.mm.1	5.06905	4.43303	1.55403	0.0159842				NONMMUT073071	NONCODE	Non-coding transcript identified by NONCODE: Sense No Exonic	chrX	ncrna
TC0X00002854.mm.1	5.02999	5.7473	-1.64411	0.032819		Gm23322	predicted gene, 23322 [Source:MGI Symbol;Acc:MGI:5453099]	ENSMUST00000104464	ENSEMBL	predicted gene, 23322 [gene_biotype:snRNA transcript_biotype:snRNA]	chrX	ncrna
TC0X00002864.mm.1	5.4393	6.24839	-1.75211	0.0356969				uc029xmk.1	UCSC Genes	Mus musculus non-coding RNA, oocyte_clustered_small_RNA9317, complete sequence.	chrX	ncrna
TC0X00003057.mm.1	5.55525	7.57721	-4.06134	0.0103217	331535	Serpina7	serine (or cysteine) peptidase inhibitor, clade A (alpha-1 antiproteinase, antitrypsin), member 7; serine (or cysteine) peptidase inhibitor, clade A (alpha-1 antiproteinase, antitrypsin), member 7	NM_177920; ENSMUST00000033626; ENSMUST00000060824; ENSMUST00000152457; BC132100; NM_177920.5; OTTMUST00000044986; OTTMUST00000044987; OTTMUST00000044988; uc009uka.2; uc009ukb.2; uc012hpd.1	RefSeq; ENSEMBL; GenBank; MGI/Jackson Lab; Havana transcript; UCSC Genes	Mus musculus serine (or cysteine) peptidase inhibitor, clade A (alpha-1 antiproteinase, antitrypsin), member 7 (Serpina7), mRNA.; serine (or cysteine) peptidase inhibitor, clade A (alpha-1 antiproteinase, antitrypsin), member 7 [gene_biotype:protein_coding transcript_biotype:protein_coding]; Mus musculus serine (or cysteine) peptidase inhibitor, clade A (alpha-1 antiproteinase, antitrypsin), memb…	chrX	coding
TC0X00003121.mm.1	5.11006	4.48358	1.54379	0.00887219		Gm8202	predicted gene 8202 [Source:MGI Symbol;Acc:MGI:3646496]	ENSMUST00000117682; NONMMUT074167; OTTMUST00000045370	ENSEMBL; NONCODE; Havana transcript	predicted gene 8202 [gene_biotype:processed_pseudogene transcript_biotype:processed_pseudogene]; Non-coding transcript identified by NONCODE: Linc; glutaredoxin (Glrx) pseudogene[gene_biotype:processed_pseudogene transcript_biotype:processed_pseudogene]	chrX	ncrna
TC0X00003162.mm.1	5.25402	4.54983	1.62923	0.0171314				KnowTID_00008069; NONMMUT074304	Luo lincRNA; NONCODE	Non-coding transcript identified by Luo, et al.; Non-coding transcript identified by NONCODE: Linc	chrX	ncrna
TC0X00003346.mm.1	6.39205	5.7442	1.56683	0.0121649	56382	Rab9	RAB9, member RAS oncogene family; RAB9, member RAS oncogene family	NM_019773; ENSMUST00000049435; ENSMUST00000112091; ENSMUST00000149315; BC008160; NM_019773.2; OTTMUST00000046679; OTTMUST00000046680; OTTMUST00000046681; uc009uwu.2	RefSeq; ENSEMBL; GenBank; MGI/Jackson Lab; Havana transcript; UCSC Genes	Mus musculus RAB9, member RAS oncogene family (Rab9), mRNA.; RAB9, member RAS oncogene family [gene_biotype:protein_coding transcript_biotype:protein_coding]; Mus musculus RAB9, member RAS oncogene family, mRNA (cDNA clone MGC:11411 IMAGE:3964134), complete cds.; RAB9, member RAS oncogene family ; RAB9, member RAS oncogene family[gene_biotype:protein_coding transcript_biotype:protein_coding]	chrX	coding
TC0Y00000230.mm.1	9.16993	10.1157	-1.92618	0.0380132		n-R5s1	nuclear encoded rRNA 5S 1 [Source:MGI Symbol;Acc:MGI:4421733]	ENSMUST00000101925	ENSEMBL	nuclear encoded rRNA 5S 1 [gene_biotype:rRNA transcript_biotype:rRNA]	chrY	ncrna
TC1000000029.mm.1	7.69439	8.31443	-1.53691	0.0303861		Gm22739	predicted gene, 22739 [Source:MGI Symbol;Acc:MGI:5452516]	ENSMUST00000083437	ENSEMBL	predicted gene, 22739 [gene_biotype:snRNA transcript_biotype:snRNA]	chr10	ncrna
TC1000000151.mm.1	4.84002	4.04323	1.73723	0.0172988				NONMMUT004912; uc007enp.1	NONCODE; UCSC Genes	Non-coding transcript identified by NONCODE: Sense No Exonic; Mus musculus adult male spinal cord cDNA, RIKEN full-length enriched library, clone:A330097J04 product:unclassifiable, full insert sequence.	chr10	ncrna
TC1000000192.mm.1	6.4214	5.56186	1.81445	0.000890907	26464	Vnn3	vanin 3; vanin 3	NM_011979; ENSMUST00000020190; BC111521; NM_011979.2; OTTMUST00000049439; uc007eqb.2	RefSeq; ENSEMBL; GenBank; MGI/Jackson Lab; Havana transcript; UCSC Genes	Mus musculus vanin 3 (Vnn3), mRNA.; vanin 3 [gene_biotype:protein_coding transcript_biotype:protein_coding]; Mus musculus vanin 3, mRNA (cDNA clone MGC:124285 IMAGE:40047284), complete cds.; vanin 3 ; vanin 3[gene_biotype:protein_coding transcript_biotype:protein_coding]	chr10	coding
TC1000000193.mm.1	7.90121	6.25482	3.1305	0.000774131	22361	Vnn1	vanin 1; vanin 1	NM_011704; ENSMUST00000041416; BC019203; NM_011704.3; OTTMUST00000117358; uc007eqc.2	RefSeq; ENSEMBL; GenBank; MGI/Jackson Lab; Havana transcript; UCSC Genes	Mus musculus vanin 1 (Vnn1), mRNA.; vanin 1 [gene_biotype:protein_coding transcript_biotype:protein_coding]; Mus musculus vanin 1, mRNA (cDNA clone MGC:29064 IMAGE:5041670), complete cds.; vanin 1 ; vanin 1[gene_biotype:protein_coding transcript_biotype:protein_coding]	chr10	coding
TC1000000229.mm.1	6.67935	8.06992	-2.62184	0.00378701		LOC215866	PREDICTED: uncharacterized LOC215866 (LOC215866), mRNA.	XM_003688870.1	MGI/Jackson Lab	PREDICTED: uncharacterized LOC215866 (LOC215866), mRNA.	chr10	ncrna
TC1000000387.mm.1	2.27119	2.93722	-1.5867	0.00269169				NONMMUT005438	NONCODE	Non-coding transcript identified by NONCODE: Linc	chr10	ncrna
TC1000000590.mm.1	6.90841	6.29422	1.5307	0.00723438	73132	Slc25a16	solute carrier family 25 (mitochondrial carrier, Graves disease autoantigen), member 16; solute carrier family 25 (mitochondrial carrier, Graves disease autoantigen), member 16	NM_175194; ENSMUST00000044977; ENSMUST00000138597; ENSMUST00000144459; ENSMUST00000152350; BC138983; BC138984; NM_175194.2; OTTMUST00000076230; OTTMUST00000076231; OTTMUST00000076232; OTTMUST00000076233; NONMMUT005883; NONMMUT005884; uc007fjh.1; uc029qye.1	RefSeq; ENSEMBL; GenBank; MGI/Jackson Lab; Havana transcript; NONCODE; UCSC Genes	Mus musculus solute carrier family 25 (mitochondrial carrier, Graves disease autoantigen), member 16 (Slc25a16), mRNA.; solute carrier family 25 (mitochondrial carrier, Graves disease autoantigen), member 16 [gene_biotype:protein_coding transcript_biotype:protein_coding]; solute carrier family 25 (mitochondrial carrier, Graves disease autoantigen), member 16 [gene_biotype:protein_coding transcrip…	chr10	coding
TC1000000604.mm.1	5.29642	7.12228	-3.54517	0.00651454	30045	Dnajc12	DnaJ (Hsp40) homolog, subfamily C, member 12; DnaJ (Hsp40) homolog, subfamily C, member 12	NM_001253685; NM_013888; ENSMUST00000043317; ENSMUST00000129625; ENSMUST00000136832; BC013501; NM_001253685.1; NM_013888.3; OTTMUST00000076207; OTTMUST00000076208; OTTMUST00000076209; uc007fkg.2; uc011xfm.1	RefSeq; ENSEMBL; GenBank; MGI/Jackson Lab; Havana transcript; UCSC Genes	Mus musculus DnaJ (Hsp40) homolog, subfamily C, member 12 (Dnajc12), transcript variant 2, mRNA.; Mus musculus DnaJ (Hsp40) homolog, subfamily C, member 12 (Dnajc12), transcript variant 1, mRNA.; DnaJ (Hsp40) homolog, subfamily C, member 12 [gene_biotype:protein_coding transcript_biotype:protein_coding]; DnaJ (Hsp40) homolog, subfamily C, member 12 [gene_biotype:protein_coding transcript_biotype:…	chr10	coding
TC1000000694.mm.1	4.58849	3.96753	1.5379	0.0356257				NONMMUT006168; NONMMUT006169	NONCODE	Non-coding transcript identified by NONCODE: Sense No Exonic	chr10	ncrna
TC1000000822.mm.1	4.44952	5.22624	-1.71323	0.000352091	19152	Prtn3	proteinase 3; Synthetic construct Mus musculus clone IMAGE:100015718, MGC:183407 proteinase 3 (Prtn3) mRNA, encodes complete protein.; proteinase 3	NM_011178; ENSMUST00000006679; ENSMUST00000163188; ENSMUST00000164134; ENSMUST00000165982; ENSMUST00000166201; ENSMUST00000171489; BC148715; NM_011178.2; OTTMUST00000089581; OTTMUST00000089582; OTTMUST00000089583; OTTMUST00000089584; OTTMUST00000089585; OTTMUST00000089586; NONMMUT006371; uc007gah.1; uc011xie.1	RefSeq; ENSEMBL; GenBank; MGI/Jackson Lab; Havana transcript; NONCODE; UCSC Genes	Mus musculus proteinase 3 (Prtn3), mRNA.; proteinase 3 [gene_biotype:protein_coding transcript_biotype:protein_coding]; proteinase 3 [gene_biotype:protein_coding transcript_biotype:processed_transcript]; proteinase 3 [gene_biotype:protein_coding transcript_biotype:retained_intron]; Synthetic construct Mus musculus clone IMAGE:100015718, MGC:183407 proteinase 3 (Prtn3) mRNA, encodes complete prote…	chr10	coding
TC1000000852.mm.1	9.87843	9.16972	1.63434	0.00501919	70335	Reep6	receptor accessory protein 6; receptor accessory protein 6	NM_001204931; NM_139292; ENSMUST00000040081; ENSMUST00000105354; ENSMUST00000105355; ENSMUST00000105357; ENSMUST00000105358; ENSMUST00000153167; BC029741; NM_001204931.1; NM_139292.2; OTTMUST00000045836; OTTMUST00000045837; OTTMUST00000045838; OTTMUST00000045839; OTTMUST00000047779; OTTMUST00000047780; uc007gct.2; uc007gcu.2	RefSeq; ENSEMBL; GenBank; MGI/Jackson Lab; Havana transcript; UCSC Genes	Mus musculus receptor accessory protein 6 (Reep6), transcript variant 2, mRNA.; Mus musculus receptor accessory protein 6 (Reep6), transcript variant 1, mRNA.; receptor accessory protein 6 [gene_biotype:protein_coding transcript_biotype:protein_coding]; receptor accessory protein 6 [gene_biotype:protein_coding transcript_biotype:retained_intron]; Mus musculus receptor accessory protein 6, mRNA (c…	chr10	coding
TC1000000965.mm.1	5.34634	5.94786	-1.51732	0.00331689				uc029ray.1	UCSC Genes	Mus musculus non-coding RNA, oocyte_clustered_small_RNA1961, complete sequence.	chr10	ncrna
TC1000000990.mm.1	1.51836	2.38245	-1.82018	0.0414691				uc011xkj.2	UCSC Genes	Mus musculus non-coding RNA, oocyte_clustered_small_RNA2935, complete sequence.	chr10	ncrna
TC1000001043.mm.1	1.99632	3.56932	-2.97523	0.0319153				NONMMUT006666	NONCODE	Non-coding transcript identified by NONCODE: Antisense	chr10	ncrna
TC1000001064.mm.1	6.78206	8.08496	-2.46723	0.028625				NONMMUT006708	NONCODE	Non-coding transcript identified by NONCODE: Sense No Exonic	chr10	ncrna
TC1000001125.mm.1	4.24699	3.61995	1.54439	0.00227961	100316689	Mir1931	microRNA 1931; microRNA 1931	NR_035452; NR_035452.1; ENSMUST00000158589; uc011xlp.1	RefSeq; MGI/Jackson Lab; ENSEMBL; UCSC Genes	Mus musculus microRNA 1931 (Mir1931), microRNA.; microRNA 1931 ; microRNA 1931 [gene_biotype:miRNA transcript_biotype:miRNA]	chr10	ncrna
TC1000001133.mm.1	9.36133	8.44115	1.89235	0.0132952	15109	Hal	histidine ammonia lyase; histidine ammonia lyase	NM_010401; ENSMUST00000016031; ENSMUST00000129421; ENSMUST00000132624; ENSMUST00000152883; BC057637; BC157999; NM_010401.3; OTTMUST00000076673; OTTMUST00000076674; OTTMUST00000076675; OTTMUST00000076676; uc007gus.1	RefSeq; ENSEMBL; GenBank; MGI/Jackson Lab; Havana transcript; UCSC Genes	Mus musculus histidine ammonia lyase (Hal), mRNA.; histidine ammonia lyase [gene_biotype:protein_coding transcript_biotype:nonsense_mediated_decay]; histidine ammonia lyase [gene_biotype:protein_coding transcript_biotype:protein_coding]; histidine ammonia lyase [gene_biotype:protein_coding transcript_biotype:retained_intron]; histidine ammonia lyase [gene_biotype:protein_coding transcript_biotype…	chr10	coding
TC1000001141.mm.1	3.76301	5.14993	-2.61521	0.000699385		Gm3571	predicted gene 3571 [Source:MGI Symbol;Acc:MGI:3781748]	ENSMUST00000170703	ENSEMBL	predicted gene 3571 [gene_biotype:pseudogene transcript_biotype:pseudogene]	chr10	ncrna
TC1000001253.mm.1	6.65578	6.03087	1.54212	0.00847661		Gm15664	predicted gene 15664 [Source:MGI Symbol;Acc:MGI:3783106]	ENSMUST00000160167; OTTMUST00000061637	ENSEMBL; Havana transcript	predicted gene 15664 [gene_biotype:unprocessed_pseudogene transcript_biotype:unprocessed_pseudogene]; DEP domain containing 6 (Depdc6) pseudogene[gene_biotype:unprocessed_pseudogene transcript_biotype:unprocessed_pseudogene]	chr10	ncrna
TC1000001260.mm.1	5.30674	6.13762	-1.77877	0.000909517	108030	Lin7a	lin-7 homolog A (C. elegans); lin-7 homolog A (C. elegans)	NM_001033223; NM_001039354; NM_001284329; ENSMUST00000020057; ENSMUST00000105280; NM_001033223.2; NM_001039354.1; NONMMUT007233; NONMMUT007234; uc007gyx.1; uc007gyy.1	RefSeq; ENSEMBL; MGI/Jackson Lab; NONCODE; UCSC Genes	Mus musculus lin-7 homolog A (C. elegans) (Lin7a), transcript variant 2, mRNA.; Mus musculus lin-7 homolog A (C. elegans) (Lin7a), transcript variant 1, mRNA.; Mus musculus lin-7 homolog A (C. elegans) (Lin7a), transcript variant 3, mRNA.; lin-7 homolog A (C. elegans) [gene_biotype:protein_coding transcript_biotype:protein_coding]; lin-7 homolog A (C. elegans) ; Non-coding transcript identified b…	chr10	coding
TC1000001261.mm.1	2.17757	2.96642	-1.7277	0.00542911				NONMMUT007231	NONCODE	Non-coding transcript identified by NONCODE: Sense No Exonic	chr10	ncrna
TC1000001264.mm.1	7.38733	6.63953	1.67923	0.0207569				uc029rfl.1	UCSC Genes	Mus musculus non-coding RNA, oocyte_clustered_small_RNA8675, complete sequence.	chr10	ncrna
TC1000001271.mm.1	5.14088	6.40307	-2.39858	0.042452		Gm23105	predicted gene, 23105 [Source:MGI Symbol;Acc:MGI:5452882]	ENSMUST00000083719	ENSEMBL	predicted gene, 23105 [gene_biotype:snoRNA transcript_biotype:snoRNA]	chr10	ncrna
TC1000001336.mm.1	7.26421	6.67719	1.50214	0.00367442	19263	Ptprb	protein tyrosine phosphatase, receptor type, B; protein tyrosine phosphatase, receptor type, B	NM_029928; ENSMUST00000092167; BC141006; BC145111; NM_029928.2; NONMMUT007461; NONMMUT007462; uc007hbu.1; uc007hbv.2	RefSeq; ENSEMBL; GenBank; MGI/Jackson Lab; NONCODE; UCSC Genes	Mus musculus protein tyrosine phosphatase, receptor type, B (Ptprb), mRNA.; protein tyrosine phosphatase, receptor type, B [gene_biotype:protein_coding transcript_biotype:protein_coding]; Mus musculus protein tyrosine phosphatase, receptor type, B, mRNA (cDNA clone MGC:175967 IMAGE:9055618), complete cds.; Mus musculus protein tyrosine phosphatase, receptor type, B, mRNA (cDNA clone MGC:178667 IM…	chr10	coding
TC1000003221.mm.1	7.11523	6.37823	1.6667	0.00456152	19683	Rdh16	retinol dehydrogenase 16; retinol dehydrogenase 16	NM_009040; ENSMUST00000071646; ENSMUST00000155739; BC089612; NM_009040.3; OTTMUST00000068442; OTTMUST00000068443; uc007hkq.2; uc007hkr.2	RefSeq; ENSEMBL; GenBank; MGI/Jackson Lab; Havana transcript; UCSC Genes	Mus musculus retinol dehydrogenase 16 (Rdh16), mRNA.; retinol dehydrogenase 16 [gene_biotype:protein_coding transcript_biotype:protein_coding]; retinol dehydrogenase 16 [gene_biotype:protein_coding transcript_biotype:nonsense_mediated_decay]; Mus musculus retinol dehydrogenase 16, mRNA (cDNA clone MGC:107668 IMAGE:6763439), complete cds.; retinol dehydrogenase 16 ; retinol dehydrogenase 16[gene_b…	chr10	coding
TC1000001918.mm.1	6.86466	8.22806	-2.57291	0.00402345				KnowTID_00000908; NONMMUT005102	Luo lincRNA; NONCODE	Non-coding transcript identified by Luo, et al.; Non-coding transcript identified by NONCODE: Linc	chr10	ncrna
TC1000001994.mm.1	3.52866	4.18779	-1.57913	0.0210457	215900	Fam26f	family with sequence similarity 26, member F; family with sequence similarity 26, member F	NM_175449; ENSMUST00000062784; BC095946; NM_175449.4; uc007eur.2	RefSeq; ENSEMBL; GenBank; MGI/Jackson Lab; UCSC Genes	Mus musculus family with sequence similarity 26, member F (Fam26f), mRNA.; family with sequence similarity 26, member F [gene_biotype:protein_coding transcript_biotype:protein_coding]; Mus musculus family with sequence similarity 26, member F, mRNA (cDNA clone MGC:106111 IMAGE:4945137), complete cds.; family with sequence similarity 26, member F	chr10	coding
TC1000002298.mm.1	4.2723	4.8921	-1.53666	0.0323477		Gm22829	predicted gene, 22829 [Source:MGI Symbol;Acc:MGI:5452606]	ENSMUST00000083771	ENSEMBL	predicted gene, 22829 [gene_biotype:snRNA transcript_biotype:snRNA]	chr10	ncrna
TC1000002447.mm.1	5.258	4.5107	1.67865	0.0140326				KnowTID_00000988; NONMMUT006332	Luo lincRNA; NONCODE	Non-coding transcript identified by Luo, et al.; Non-coding transcript identified by NONCODE: Linc	chr10	ncrna
TC1000002476.mm.1	5.61212	6.21295	-1.51659	0.0482703		Gm25794	predicted gene, 25794 [Source:MGI Symbol;Acc:MGI:5455571]	ENSMUST00000083286	ENSEMBL	predicted gene, 25794 [gene_biotype:snRNA transcript_biotype:snRNA]	chr10	ncrna
TC1000002605.mm.1	5.48855	4.25959	2.34398	0.00040721	12952	Cry1	cryptochrome 1 (photolyase-like); cryptochrome 1 (photolyase-like)	NM_007771; ENSMUST00000020227; BC022174; BC085499; NM_007771.3; uc007gle.1	RefSeq; ENSEMBL; GenBank; MGI/Jackson Lab; UCSC Genes	Mus musculus cryptochrome 1 (photolyase-like) (Cry1), mRNA.; cryptochrome 1 (photolyase-like) [gene_biotype:protein_coding transcript_biotype:protein_coding]; Mus musculus cryptochrome 1 (photolyase-like), mRNA (cDNA clone MGC:13933 IMAGE:4036758), complete cds.; Mus musculus cryptochrome 1 (photolyase-like), mRNA (cDNA clone MGC:102142 IMAGE:6813367), complete cds.; cryptochrome 1 (photolyase-li…	chr10	coding
TC1000002658.mm.1	5.89409	3.94333	3.8658	0.00138831	216227	Slc17a8	solute carrier family 17 (sodium-dependent inorganic phosphate cotransporter), member 8; solute carrier family 17 (sodium-dependent inorganic phosphate cotransporter), member 8	NM_182959; ENSMUST00000020102; ENSMUST00000105295; BC042593; NM_182959.3; OTTMUST00000060329; OTTMUST00000060330; uc007gsj.1; uc007gsk.2	RefSeq; ENSEMBL; GenBank; MGI/Jackson Lab; Havana transcript; UCSC Genes	Mus musculus solute carrier family 17 (sodium-dependent inorganic phosphate cotransporter), member 8 (Slc17a8), transcript variant 1, mRNA.; solute carrier family 17 (sodium-dependent inorganic phosphate cotransporter), member 8 [gene_biotype:protein_coding transcript_biotype:protein_coding]; Mus musculus solute carrier family 17 (sodium-dependent inorganic phosphate cotransporter), member 8, mRN…	chr10	coding
TC1000002659.mm.1	6.28775	5.68943	1.51395	0.000335582	213326	Scyl2	SCY1-like 2 (S. cerevisiae); SCY1-like 2 (S. cerevisiae)	NM_198021; ENSMUST00000092227; ENSMUST00000105294; ENSMUST00000173526; ENSMUST00000174252; ENSMUST00000174429; ENSMUST00000174492; ENSMUST00000174575; BC042443; NM_198021.2; OTTMUST00000095202; OTTMUST00000095203; OTTMUST00000095204; OTTMUST00000095205; OTTMUST00000095206; OTTMUST00000095207; OTTMUST00000095208; NONMMUT006756; NONMMUT006757; uc007gsl.1; uc007gsm.1; uc007gsn.1; uc007gso.1; uc007gs…	RefSeq; ENSEMBL; GenBank; MGI/Jackson Lab; Havana transcript; NONCODE; UCSC Genes	Mus musculus SCY1-like 2 (S. cerevisiae) (Scyl2), transcript variant 1, mRNA.; SCY1-like 2 (S. cerevisiae) [gene_biotype:protein_coding transcript_biotype:protein_coding]; SCY1-like 2 (S. cerevisiae) [gene_biotype:protein_coding transcript_biotype:processed_transcript]; SCY1-like 2 (S. cerevisiae) [gene_biotype:protein_coding transcript_biotype:retained_intron]; Mus musculus SCY1-like 2 (S. cerev…	chr10	coding
TC1000002813.mm.1	4.19618	2.25656	3.83604	0.00920437				NONMMUT007218	NONCODE	Non-coding transcript identified by NONCODE: Linc	chr10	ncrna
TC1000002814.mm.1	4.58364	3.55503	2.04006	0.0150236	380660	Acss3	acyl-CoA synthetase short-chain family member 3; acyl-CoA synthetase short-chain family member 3	NM_001142804; NM_198636; ENSMUST00000044668; ENSMUST00000065567; ENSMUST00000165067; BC113198; NM_001142804.1; NM_198636.3; OTTMUST00000055561; OTTMUST00000055562; NONMMUT007222; uc007gyv.2; uc007gyw.2; uc011xna.1	RefSeq; ENSEMBL; GenBank; MGI/Jackson Lab; Havana transcript; NONCODE; UCSC Genes	Mus musculus acyl-CoA synthetase short-chain family member 3 (Acss3), transcript variant 1, mRNA.; Mus musculus acyl-CoA synthetase short-chain family member 3 (Acss3), transcript variant 2, mRNA.; acyl-CoA synthetase short-chain family member 3 [gene_biotype:protein_coding transcript_biotype:protein_coding]; acyl-CoA synthetase short-chain family member 3 [gene_biotype:protein_coding transcript_…	chr10	coding
TC1000002830.mm.1	2.07512	2.72041	-1.56405	0.0261661				NONMMUT007254	NONCODE	Non-coding transcript identified by NONCODE: Sense No Exonic	chr10	ncrna
TC1000002896.mm.1	6.37098	5.68542	1.60833	0.024024				NONMMUT007440	NONCODE	Non-coding transcript identified by NONCODE: Linc	chr10	ncrna
TC1000002903.mm.1	4.28566	4.91659	-1.54856	2.26574e-05	14160	Lgr5	leucine rich repeat containing G protein coupled receptor 5; Synthetic construct Mus musculus clone IMAGE:100062127, MGC:190372 leucine rich repeat containing G protein coupled receptor 5 (Lgr5) mRNA, encodes complete protein.; leucine rich repeat containing G protein coupled receptor 5	NM_010195; ENSMUST00000020350; ENSMUST00000105272; ENSMUST00000129309; ENSMUST00000144732; ENSMUST00000149008; ENSMUST00000172806; ENSMUST00000173619; ENSMUST00000173740; BC156649; NM_010195.2; OTTMUST00000049259; OTTMUST00000049260; OTTMUST00000049261; OTTMUST00000049262; OTTMUST00000049263; OTTMUST00000096995; OTTMUST00000096996; OTTMUST00000096997; NONMMUT007454; NONMMUT007455; NONMMUT007457; …	RefSeq; ENSEMBL; GenBank; MGI/Jackson Lab; Havana transcript; NONCODE; UCSC Genes	Mus musculus leucine rich repeat containing G protein coupled receptor 5 (Lgr5), mRNA.; leucine rich repeat containing G protein coupled receptor 5 [gene_biotype:protein_coding transcript_biotype:protein_coding]; leucine rich repeat containing G protein coupled receptor 5 [gene_biotype:protein_coding transcript_biotype:retained_intron]; leucine rich repeat containing G protein coupled receptor 5 …	chr10	coding
TC1000003044.mm.1	4.42933	5.06978	-1.55882	0.0408426	74694	Tbc1d30	TBC1 domain family, member 30; TBC1 domain family, member 30	NM_029057; ENSMUST00000064107; BC138285; BC138286; NM_029057.1; uc007hfl.2; uc007hfm.2	RefSeq; ENSEMBL; GenBank; MGI/Jackson Lab; UCSC Genes	Mus musculus TBC1 domain family, member 30 (Tbc1d30), mRNA.; TBC1 domain family, member 30 [gene_biotype:protein_coding transcript_biotype:protein_coding]; Mus musculus TBC1 domain family, member 30, mRNA (cDNA clone MGC:169909 IMAGE:8861304), complete cds.; Mus musculus TBC1 domain family, member 30, mRNA (cDNA clone MGC:169910 IMAGE:8861305), complete cds.; TBC1 domain family, member 30	chr10	coding
TC1000003077.mm.1	6.96657	5.43686	2.88729	0.0370762				KnowTID_00001096; NONMMUT008003	Luo lincRNA; NONCODE	Non-coding transcript identified by Luo, et al.; Non-coding transcript identified by NONCODE: Linc	chr10	ncrna
TC1000003078.mm.1	6.60092	5.58841	2.01742	0.00544407	20503	Slc16a7	solute carrier family 16 (monocarboxylic acid transporters), member 7; solute carrier family 16 (monocarboxylic acid transporters), member 7	NM_011391; ENSMUST00000063318; ENSMUST00000105257; BC117803; BC117804; BC126960; NM_011391.1; uc007hgx.1; uc007hgy.1; uc007hgz.1	RefSeq; ENSEMBL; GenBank; MGI/Jackson Lab; UCSC Genes	Mus musculus solute carrier family 16 (monocarboxylic acid transporters), member 7 (Slc16a7), mRNA.; solute carrier family 16 (monocarboxylic acid transporters), member 7 [gene_biotype:protein_coding transcript_biotype:protein_coding]; Mus musculus solute carrier family 16 (monocarboxylic acid transporters), member 7, mRNA (cDNA clone MGC:143699 IMAGE:40092297), complete cds.; Mus musculus solute…	chr10	coding
TC1000003115.mm.1	8.22121	7.62458	1.51218	0.0131224	16325	Inhbc	inhibin beta-C; inhibin beta-C	NM_010565; ENSMUST00000026472; BC026140; NM_010565.3; uc007hjj.2	RefSeq; ENSEMBL; GenBank; MGI/Jackson Lab; UCSC Genes	Mus musculus inhibin beta-C (Inhbc), mRNA.; inhibin beta-C [gene_biotype:protein_coding transcript_biotype:protein_coding]; Mus musculus inhibin beta-C, mRNA (cDNA clone MGC:13911 IMAGE:4212175), complete cds.; inhibin beta-C	chr10	coding
TC1000003158.mm.1	8.17148	7.51424	1.57706	0.00517778	211389	Suox	sulfite oxidase; sulfite oxidase	NM_173733; ENSMUST00000054764; BC027197; NM_173733.3; uc007hnt.2	RefSeq; ENSEMBL; GenBank; MGI/Jackson Lab; UCSC Genes	Mus musculus sulfite oxidase (Suox), mRNA.; sulfite oxidase [gene_biotype:protein_coding transcript_biotype:protein_coding]; Mus musculus sulfite oxidase, mRNA (cDNA clone MGC:28458 IMAGE:4160277), complete cds.; sulfite oxidase	chr10	coding
TC1100000032.mm.1	8.49319	7.88726	1.52196	0.00611279	103655	Sec14l4	SEC14-like lipid binding 4; SEC14-like 4 (S. cerevisiae)	NM_146013; ENSMUST00000019512; ENSMUST00000125351; ENSMUST00000126423; ENSMUST00000129689; ENSMUST00000131171; ENSMUST00000134482; ENSMUST00000136222; ENSMUST00000137324; BC026948; NM_146013.1; OTTMUST00000011246; OTTMUST00000011247; OTTMUST00000011248; OTTMUST00000011249; OTTMUST00000011250; OTTMUST00000011251; OTTMUST00000011252; OTTMUST00000011253; NONMMUT008323; uc007hue.1	RefSeq; ENSEMBL; GenBank; MGI/Jackson Lab; Havana transcript; NONCODE; UCSC Genes	Mus musculus SEC14-like lipid binding 4 (Sec14l4), mRNA.; SEC14-like 4 (S. cerevisiae) [gene_biotype:protein_coding transcript_biotype:protein_coding]; SEC14-like 4 (S. cerevisiae) [gene_biotype:protein_coding transcript_biotype:processed_transcript]; Mus musculus SEC14-like 4 (S. cerevisiae), mRNA (cDNA clone MGC:30313 IMAGE:5136664), complete cds.; SEC14-like 4 (S. cerevisiae) ; SEC14-like 4 (S…	chr11	coding
TC1100000193.mm.1	4.49973	3.66854	1.77916	0.00602818				NONMMUT008759	NONCODE	Non-coding transcript identified by NONCODE: Sense No Exonic	chr11	ncrna
TC1100000271.mm.1	5.36675	6.08059	-1.64017	0.0279151		n-R5s68	nuclear encoded rRNA 5S 68 [Source:MGI Symbol;Acc:MGI:4421913]	ENSMUST00000122639	ENSEMBL	nuclear encoded rRNA 5S 68 [gene_biotype:rRNA transcript_biotype:rRNA]	chr11	ncrna
TC1100000324.mm.1	7.31669	6.5399	1.71331	0.0137244	67579	Cpeb4	cytoplasmic polyadenylation element binding protein 4; cytoplasmic polyadenylation element binding protein 4	NM_026252; ENSMUST00000020543; ENSMUST00000109412; ENSMUST00000155278; BC115430; BC115431; BC145863; BC145865; NM_026252.3; OTTMUST00000011965; OTTMUST00000011966; NONMMUT009159; NONMMUT009162; uc007iip.2; uc007iiq.1; uc007iir.1; uc007iis.1; uc007iit.1	RefSeq; ENSEMBL; GenBank; MGI/Jackson Lab; Havana transcript; NONCODE; UCSC Genes	Mus musculus cytoplasmic polyadenylation element binding protein 4 (Cpeb4), transcript variant 1, mRNA.; cytoplasmic polyadenylation element binding protein 4 [gene_biotype:protein_coding transcript_biotype:protein_coding]; Mus musculus cytoplasmic polyadenylation element binding protein 4, mRNA (cDNA clone MGC:143860 IMAGE:40094123), complete cds.; Mus musculus cytoplasmic polyadenylation elemen…	chr11	coding
TC1100000325.mm.1	4.3373	3.34004	1.99621	0.0207245				NONMMUT009160; NONMMUT009161	NONCODE	Non-coding transcript identified by NONCODE: Sense No Exonic	chr11	ncrna
TC1100000576.mm.1	9.17589	8.47855	1.62151	0.0006586	66397	Sar1b	SAR1 gene homolog B (S. cerevisiae); SAR1 gene homolog B (S. cerevisiae)	NM_025535; ENSMUST00000020653; ENSMUST00000136363; BC082550; BC085178; NM_025535.2; OTTMUST00000012480; OTTMUST00000012481; NONMMUT009672; uc007iup.2	RefSeq; ENSEMBL; GenBank; MGI/Jackson Lab; Havana transcript; NONCODE; UCSC Genes	Mus musculus SAR1 gene homolog B (S. cerevisiae) (Sar1b), mRNA.; SAR1 gene homolog B (S. cerevisiae) [gene_biotype:protein_coding transcript_biotype:protein_coding]; SAR1 gene homolog B (S. cerevisiae) [gene_biotype:protein_coding transcript_biotype:processed_transcript]; Mus musculus SAR1 gene homolog B (S. cerevisiae), mRNA (cDNA clone MGC:99997 IMAGE:30357800), complete cds.; Mus musculus SAR1…	chr11	coding
TC1100000644.mm.1	5.42352	6.01909	-1.51107	0.000874713	215335	Slc36a1	solute carrier family 36 (proton/amino acid symporter), member 1; solute carrier family 36 (proton/amino acid symporter), member 1	NM_153139; ENSMUST00000020499; ENSMUST00000108867; ENSMUST00000108872; ENSMUST00000147506; ENSMUST00000152336; BC138556; BC138558; NM_153139.4; OTTMUST00000012655; OTTMUST00000012656; OTTMUST00000012657; OTTMUST00000012658; NONMMUT009829; NONMMUT009830; uc007izc.1; uc007izd.1; uc007ize.1	RefSeq; ENSEMBL; GenBank; MGI/Jackson Lab; Havana transcript; NONCODE; UCSC Genes	Mus musculus solute carrier family 36 (proton/amino acid symporter), member 1 (Slc36a1), mRNA.; solute carrier family 36 (proton/amino acid symporter), member 1 [gene_biotype:protein_coding transcript_biotype:protein_coding]; solute carrier family 36 (proton/amino acid symporter), member 1 [gene_biotype:protein_coding transcript_biotype:processed_transcript]; Mus musculus solute carrier family 36…	chr11	coding
TC1100000777.mm.1	7.24886	5.75061	2.82501	0.00308018		LOC100862356	PREDICTED: uncharacterized LOC100862356 (LOC100862356), miscRNA.	XR_141097.1	MGI/Jackson Lab	PREDICTED: uncharacterized LOC100862356 (LOC100862356), miscRNA.	chr11	ncrna
TC1100000895.mm.1	5.37303	6.44508	-2.10242	0.0429326	100216530	Snord118	small nucleolar RNA, C/D box 118	NR_028566.1; ENSMUST00000082965	MGI/Jackson Lab; ENSEMBL	small nucleolar RNA, C/D box 118 ; small nucleolar RNA, C/D box 118 [gene_biotype:snoRNA transcript_biotype:snoRNA]	chr11	ncrna
TC1100001005.mm.1	6.23544	7.60244	-2.57934	0.00503085				NONMMUT010620; NONMMUT010621	NONCODE	Non-coding transcript identified by NONCODE: Sense No Exonic	chr11	ncrna
TC1100001042.mm.1	8.5374	9.25731	-1.64708	0.0401305		n-R5s71	nuclear encoded rRNA 5S 71 [Source:MGI Symbol;Acc:MGI:4421916]	ENSMUST00000093668	ENSEMBL	nuclear encoded rRNA 5S 71 [gene_biotype:rRNA transcript_biotype:rRNA]	chr11	ncrna
TC1100001047.mm.1	8.40491	7.71319	1.61521	0.000296846	74148	Cluh	clustered mitochondria (cluA/CLU1) homolog; clustered mitochondria (cluA/CLU1) homolog	NM_001081158; ENSMUST00000092915; ENSMUST00000117818; ENSMUST00000127679; ENSMUST00000128155; ENSMUST00000130398; ENSMUST00000155558; BC072573; NM_001081158.2; OTTMUST00000013922; OTTMUST00000013923; OTTMUST00000013924; OTTMUST00000013925; OTTMUST00000072555; OTTMUST00000072556; NONMMUT010666; uc007kca.1; uc007kcb.1; uc007kcc.1; uc011xyx.1	RefSeq; ENSEMBL; GenBank; MGI/Jackson Lab; Havana transcript; NONCODE; UCSC Genes	Mus musculus clustered mitochondria (cluA/CLU1) homolog (Cluh), mRNA.; clustered mitochondria (cluA/CLU1) homolog [gene_biotype:protein_coding transcript_biotype:protein_coding]; clustered mitochondria (cluA/CLU1) homolog [gene_biotype:protein_coding transcript_biotype:processed_transcript]; clustered mitochondria (cluA/CLU1) homolog [gene_biotype:protein_coding transcript_biotype:retained_intron…	chr11	coding
TC1100001245.mm.1	8.25003	9.18817	-1.91606	0.0362082		Gm23444	predicted gene, 23444 [Source:MGI Symbol;Acc:MGI:5453221]	ENSMUST00000082922	ENSEMBL	predicted gene, 23444 [gene_biotype:snRNA transcript_biotype:snRNA]	chr11	ncrna
TC1100001308.mm.1	2.1588	2.88987	-1.65987	0.00765252				NONMMUT011257	NONCODE	Non-coding transcript identified by NONCODE: Antisense	chr11	ncrna
TC1100001621.mm.1	8.98189	8.33919	1.56125	0.00263291	20918	Eif1	eukaryotic translation initiation factor 1; eukaryotic translation initiation factor 1	NM_011508; ENSMUST00000049385; ENSMUST00000132618; ENSMUST00000139846; ENSMUST00000151513; ENSMUST00000152521; BC003463; BC010791; BC081429; BC096656; BC096691; NM_011508.1; OTTMUST00000014181; OTTMUST00000014182; OTTMUST00000014183; OTTMUST00000014184; OTTMUST00000014185; NONMMUT011996; uc007lkv.1	RefSeq; ENSEMBL; GenBank; MGI/Jackson Lab; Havana transcript; NONCODE; UCSC Genes	Mus musculus eukaryotic translation initiation factor 1 (Eif1), mRNA.; eukaryotic translation initiation factor 1 [gene_biotype:protein_coding transcript_biotype:protein_coding]; eukaryotic translation initiation factor 1 [gene_biotype:protein_coding transcript_biotype:processed_transcript]; Mus musculus eukaryotic translation initiation factor 1, mRNA (cDNA clone MGC:6503 IMAGE:2648657), complet…	chr11	coding
TC1100001662.mm.1	8.44756	9.36373	-1.8871	0.0265603		Gm26316	predicted gene, 26316 [Source:MGI Symbol;Acc:MGI:5456093]	ENSMUST00000083886	ENSEMBL	predicted gene, 26316 [gene_biotype:snRNA transcript_biotype:snRNA]	chr11	ncrna
TC1100001665.mm.1	8.28665	9.16475	-1.83794	0.033781		Gm23849	predicted gene, 23849 [Source:MGI Symbol;Acc:MGI:5453626]	ENSMUST00000083833	ENSEMBL	predicted gene, 23849 [gene_biotype:snRNA transcript_biotype:snRNA]	chr11	ncrna
TC1100001667.mm.1	8.61114	9.21414	-1.51887	0.0386879	19848	Rnu2-10	U2 small nuclear RNA 10	NR_004414.1; ENSMUST00000084010	MGI/Jackson Lab; ENSEMBL	U2 small nuclear RNA 10 ; U2 small nuclear RNA 10 [gene_biotype:snRNA transcript_biotype:snRNA]	chr11	ncrna
TC1100001688.mm.1	8.13161	7.40826	1.651	0.00866615	14824	Grn	granulin; granulin	NM_008175; ENSMUST00000049460; ENSMUST00000123500; ENSMUST00000125819; ENSMUST00000127530; ENSMUST00000129997; ENSMUST00000135517; ENSMUST00000138451; ENSMUST00000148580; ENSMUST00000176953; ENSMUST00000177428; BC129849; BC129850; NM_008175.4; OTTMUST00000005699; OTTMUST00000005700; OTTMUST00000005701; OTTMUST00000005702; OTTMUST00000005784; OTTMUST00000005785; OTTMUST00000005786; OTTMUST00000104…	RefSeq; ENSEMBL; GenBank; MGI/Jackson Lab; Havana transcript; NONCODE; UCSC Genes	Mus musculus granulin (Grn), mRNA.; granulin [gene_biotype:protein_coding transcript_biotype:protein_coding]; granulin [gene_biotype:protein_coding transcript_biotype:retained_intron]; Mus musculus granulin, mRNA (cDNA clone MGC:150044 IMAGE:40109630), complete cds.; Mus musculus granulin, mRNA (cDNA clone MGC:150045 IMAGE:40109631), complete cds.; granulin ; granulin[gene_biotype:protein_coding …	chr11	coding
TC1100001801.mm.1	5.4393	6.24839	-1.75211	0.0356969				uc029roz.1	UCSC Genes	Mus musculus non-coding RNA, oocyte_clustered_small_RNA9320, complete sequence.	chr11	ncrna
TC1100001895.mm.1	4.83087	4.12123	1.6354	0.00113775	217316	Slc16a5	solute carrier family 16 (monocarboxylic acid transporters), member 5; solute carrier family 16 (monocarboxylic acid transporters), member 5	NM_001080934; ENSMUST00000092445; ENSMUST00000106532; ENSMUST00000125251; ENSMUST00000133636; ENSMUST00000139318; ENSMUST00000140567; ENSMUST00000140739; ENSMUST00000146500; ENSMUST00000153466; NM_001080934.1; OTTMUST00000007268; OTTMUST00000007269; OTTMUST00000007270; OTTMUST00000007271; OTTMUST00000007272; OTTMUST00000007273; OTTMUST00000007274; OTTMUST00000014308; OTTMUST00000014310; NONMMUT01…	RefSeq; ENSEMBL; MGI/Jackson Lab; Havana transcript; NONCODE; UCSC Genes	Mus musculus solute carrier family 16 (monocarboxylic acid transporters), member 5 (Slc16a5), mRNA.; solute carrier family 16 (monocarboxylic acid transporters), member 5 [gene_biotype:protein_coding transcript_biotype:protein_coding]; solute carrier family 16 (monocarboxylic acid transporters), member 5 [gene_biotype:protein_coding transcript_biotype:processed_transcript]; solute carrier family …	chr11	coding
TC1100004284.mm.1	7.1372	6.10039	2.05169	0.00261766	71562	Afmid	arylformamidase; arylformamidase	NM_027827; ENSMUST00000073388; ENSMUST00000131268; ENSMUST00000139945; ENSMUST00000148016; ENSMUST00000149668; ENSMUST00000153850; BC066780; NM_027827.3; OTTMUST00000008124; OTTMUST00000008125; OTTMUST00000008126; OTTMUST00000008128; OTTMUST00000008129; OTTMUST00000072772; NONMMUT012940; NONMMUT012941; uc007moa.2; uc007mob.2; uc007moc.1	RefSeq; ENSEMBL; GenBank; MGI/Jackson Lab; Havana transcript; NONCODE; UCSC Genes	Mus musculus arylformamidase (Afmid), mRNA.; arylformamidase [gene_biotype:protein_coding transcript_biotype:protein_coding]; arylformamidase [gene_biotype:protein_coding transcript_biotype:retained_intron]; Mus musculus arylformamidase, mRNA (cDNA clone MGC:74090 IMAGE:30301832), complete cds.; arylformamidase ; arylformamidase[gene_biotype:protein_coding transcript_biotype:protein_coding]; aryl…	chr11	coding
TC1100002233.mm.1	5.19305	6.22016	-2.03794	0.00242098	12808	Cobl	cordon-bleu WH2 repeat; cordon-bleu WH2 repeat	NM_001282993; NM_001282994; NM_172496; ENSMUST00000046755; ENSMUST00000109650; ENSMUST00000109651; ENSMUST00000130572; ENSMUST00000136549; ENSMUST00000146067; ENSMUST00000172827; ENSMUST00000172919; ENSMUST00000172956; ENSMUST00000174874; BC145118; BC150706; NM_172496.3; OTTMUST00000011560; OTTMUST00000011561; OTTMUST00000011562; OTTMUST00000011563; OTTMUST00000011564; OTTMUST00000096061; OTTMUST…	RefSeq; ENSEMBL; GenBank; MGI/Jackson Lab; Havana transcript; UCSC Genes	Mus musculus cordon-bleu WH2 repeat (Cobl), transcript variant 2, mRNA.; Mus musculus cordon-bleu WH2 repeat (Cobl), transcript variant 3, mRNA.; Mus musculus cordon-bleu WH2 repeat (Cobl), transcript variant 1, mRNA.; cordon-bleu WH2 repeat [gene_biotype:protein_coding transcript_biotype:protein_coding]; cordon-bleu WH2 repeat [gene_biotype:protein_coding transcript_biotype:retained_intron]; cor…	chr11	coding
TC1100002242.mm.1	3.50002	5.53244	-4.09089	0.00396265		Gm12664	predicted gene 12664 [Source:MGI Symbol;Acc:MGI:3651281]	ENSMUST00000118306; OTTMUST00000017966	ENSEMBL; Havana transcript	predicted gene 12664 [gene_biotype:processed_pseudogene transcript_biotype:processed_pseudogene]; novel pseudogene[gene_biotype:processed_pseudogene transcript_biotype:processed_pseudogene]	chr11	ncrna
TC1100002243.mm.1	6.73553	7.48283	-1.67865	0.000428186		Gm24714	predicted gene, 24714 [Source:MGI Symbol;Acc:MGI:5454491]	ENSMUST00000102382	ENSEMBL	predicted gene, 24714 [gene_biotype:miRNA transcript_biotype:miRNA]	chr11	ncrna
TC1100002245.mm.1	4.06228	4.83731	-1.71123	0.0125439				KnowTID_00001226; NONMMUT008652	Luo lincRNA; NONCODE	Non-coding transcript identified by Luo, et al.; Non-coding transcript identified by NONCODE: Linc	chr11	ncrna
TC1100002314.mm.1	6.42646	5.78958	1.55496	0.000541809	216551	Lgalsl	lectin, galactoside binding-like; lectin, galactoside binding-like	NM_173752; ENSMUST00000047028; ENSMUST00000132928; ENSMUST00000144441; ENSMUST00000154300; BC019131; NM_173752.4; OTTMUST00000011673; OTTMUST00000011674; OTTMUST00000011675; OTTMUST00000011676; NONMMUT008795; NONMMUT008796; uc007idj.2	RefSeq; ENSEMBL; GenBank; MGI/Jackson Lab; Havana transcript; NONCODE; UCSC Genes	Mus musculus lectin, galactoside binding-like (Lgalsl), mRNA.; lectin, galactoside binding-like [gene_biotype:protein_coding transcript_biotype:protein_coding]; lectin, galactoside binding-like [gene_biotype:protein_coding transcript_biotype:processed_transcript]; Mus musculus RIKEN cDNA 1110067D22 gene, mRNA (cDNA clone MGC:29165 IMAGE:5036749), complete cds.; lectin, galactoside binding-like ; …	chr11	coding
TC1100002317.mm.1	5.26388	4.55621	1.63316	0.0195208		Gm22807	predicted gene, 22807 [Source:MGI Symbol;Acc:MGI:5452584]	ENSMUST00000082737	ENSEMBL	predicted gene, 22807 [gene_biotype:snoRNA transcript_biotype:snoRNA]	chr11	ncrna
TC1100002321.mm.1	5.05751	4.39515	1.58267	0.0027904		Gm12040	predicted gene 12040 [Source:MGI Symbol;Acc:MGI:3651597]	ENSMUST00000118357; NONMMUT008811; OTTMUST00000011685	ENSEMBL; NONCODE; Havana transcript	predicted gene 12040 [gene_biotype:processed_pseudogene transcript_biotype:processed_pseudogene]; Non-coding transcript identified by NONCODE: Linc; novel pseudogene[gene_biotype:processed_pseudogene transcript_biotype:processed_pseudogene]	chr11	ncrna
TC1100002707.mm.1	7.24485	6.37205	1.83121	0.0025203				NONMMUT009695	NONCODE	Non-coding transcript identified by NONCODE: Sense No Exonic	chr11	ncrna
TC1100002748.mm.1	7.04764	5.91167	2.19767	0.00263368	20520	Slc22a5	solute carrier family 22 (organic cation transporter), member 5; solute carrier family 22 (organic cation transporter), member 5	NM_011396; ENSMUST00000019044; ENSMUST00000136307; ENSMUST00000152084; BC031118; NM_011396.3; OTTMUST00000012569; OTTMUST00000012570; OTTMUST00000071545; uc007ixc.2	RefSeq; ENSEMBL; GenBank; MGI/Jackson Lab; Havana transcript; UCSC Genes	Mus musculus solute carrier family 22 (organic cation transporter), member 5 (Slc22a5), mRNA.; solute carrier family 22 (organic cation transporter), member 5 [gene_biotype:protein_coding transcript_biotype:protein_coding]; solute carrier family 22 (organic cation transporter), member 5 [gene_biotype:protein_coding transcript_biotype:nonsense_mediated_decay]; Mus musculus solute carrier family 22…	chr11	coding
TC1100002750.mm.1	5.44388	4.85508	1.504	0.0055585		Gm12220	predicted gene 12220 [Source:MGI Symbol;Acc:MGI:3649331]	ENSMUST00000118476; OTTMUST00000012591	ENSEMBL; Havana transcript	predicted gene 12220 [gene_biotype:unprocessed_pseudogene transcript_biotype:unprocessed_pseudogene]; pseudogene similar to part of solute carrier family 22 (organic cation transporter), member 4 Slc22a4[gene_biotype:unprocessed_pseudogene transcript_biotype:unprocessed_pseudogene]	chr11	ncrna
TC1100002907.mm.1	9.29643	7.4791	3.5243	0.00086725	11671	Aldh3a2	aldehyde dehydrogenase family 3, subfamily A2; aldehyde dehydrogenase family 3, subfamily A2	NM_007437; ENSMUST00000066277; ENSMUST00000074127; ENSMUST00000108715; ENSMUST00000128991; ENSMUST00000141368; ENSMUST00000147291; ENSMUST00000149298; BC003797; NM_007437.4; OTTMUST00000012932; OTTMUST00000012933; OTTMUST00000012934; OTTMUST00000012935; OTTMUST00000012936; OTTMUST00000012937; OTTMUST00000012938; NONMMUT010082; uc007jhf.1	RefSeq; ENSEMBL; GenBank; MGI/Jackson Lab; Havana transcript; NONCODE; UCSC Genes	Mus musculus aldehyde dehydrogenase family 3, subfamily A2 (Aldh3a2), mRNA.; aldehyde dehydrogenase family 3, subfamily A2 [gene_biotype:protein_coding transcript_biotype:protein_coding]; aldehyde dehydrogenase family 3, subfamily A2 [gene_biotype:protein_coding transcript_biotype:processed_transcript]; Mus musculus aldehyde dehydrogenase family 3, subfamily A2, mRNA (cDNA clone MGC:6055 IMAGE:34…	chr11	coding
TC1100003086.mm.1	5.30207	4.68364	1.5352	0.0127123	69309	Slc16a13	solute carrier family 16 (monocarboxylic acid transporters), member 13; solute carrier family 16 (monocarboxylic acid transporters), member 13	NM_172371; ENSMUST00000060010; ENSMUST00000141290; ENSMUST00000159867; BC039949; NM_172371.3; OTTMUST00000013579; OTTMUST00000013580; OTTMUST00000089404; uc007jub.1	RefSeq; ENSEMBL; GenBank; MGI/Jackson Lab; Havana transcript; UCSC Genes	Mus musculus solute carrier family 16 (monocarboxylic acid transporters), member 13 (Slc16a13), mRNA.; solute carrier family 16 (monocarboxylic acid transporters), member 13 [gene_biotype:protein_coding transcript_biotype:protein_coding]; Mus musculus solute carrier family 16 (monocarboxylic acid transporters), member 13, mRNA (cDNA clone MGC:49559 IMAGE:4167719), complete cds.; solute carrier fa…	chr11	coding
TC1100003141.mm.1	4.03918	6.05317	-4.03895	0.0187846	237831	Slc13a5	solute carrier family 13 (sodium-dependent citrate transporter), member 5; Synthetic construct Mus musculus clone IMAGE:100062711, MGC:190938 solute carrier family 13 (sodium-dependent citrate transporter), member 5 (Slc13a5) mRNA, encodes complete protein.; solute carrier family 13 (sodium-dependent citrate transporter), member 5	NM_001004148; ENSMUST00000021161; ENSMUST00000137701; ENSMUST00000140167; BC156915; NM_001004148.4; OTTMUST00000013794; OTTMUST00000013795; OTTMUST00000013796; uc007jym.2; uc007jyn.1	RefSeq; ENSEMBL; GenBank; MGI/Jackson Lab; Havana transcript; UCSC Genes	Mus musculus solute carrier family 13 (sodium-dependent citrate transporter), member 5 (Slc13a5), mRNA.; solute carrier family 13 (sodium-dependent citrate transporter), member 5 [gene_biotype:protein_coding transcript_biotype:protein_coding]; Synthetic construct Mus musculus clone IMAGE:100062711, MGC:190938 solute carrier family 13 (sodium-dependent citrate transporter), member 5 (Slc13a5) mRNA…	chr11	coding
TC1100003314.mm.1	9.99771	9.23476	1.69696	0.0290004	16859	Lgals9	lectin, galactose binding, soluble 9; lectin, galactose binding, soluble 9	NM_001159301; NM_010708; ENSMUST00000073001; ENSMUST00000108268; ENSMUST00000108269; ENSMUST00000140073; BC003754; NM_001159301.1; NM_010708.2; OTTMUST00000000501; OTTMUST00000000502; OTTMUST00000000503; NONMMUT010938; uc007kkd.2; uc007kke.2	RefSeq; ENSEMBL; GenBank; MGI/Jackson Lab; Havana transcript; NONCODE; UCSC Genes	Mus musculus lectin, galactose binding, soluble 9 (Lgals9), transcript variant 2, mRNA.; Mus musculus lectin, galactose binding, soluble 9 (Lgals9), transcript variant 1, mRNA.; lectin, galactose binding, soluble 9 [gene_biotype:protein_coding transcript_biotype:protein_coding]; lectin, galactose binding, soluble 9 [gene_biotype:protein_coding transcript_biotype:retained_intron]; Mus musculus lec…	chr11	coding
TC1100003463.mm.1	4.07364	3.45085	1.53985	0.0417502				NONMMUT011322	NONCODE	Non-coding transcript identified by NONCODE: Sense No Exonic	chr11	ncrna
TC1100003523.mm.1	8.07435	6.07783	3.99036	0.0164868	18559	Pctp	phosphatidylcholine transfer protein; Synthetic construct Mus musculus clone IMAGE:100062268, MGC:190442 phosphatidylcholine transfer protein (Pctp) mRNA, encodes complete protein.; phosphatidylcholine transfer protein	NM_008796; ENSMUST00000020864; BC156713; NM_008796.2; OTTMUST00000002557; uc007kwl.1; uc011ycp.1	RefSeq; ENSEMBL; GenBank; MGI/Jackson Lab; Havana transcript; UCSC Genes	Mus musculus phosphatidylcholine transfer protein (Pctp), transcript variant 1, mRNA.; phosphatidylcholine transfer protein [gene_biotype:protein_coding transcript_biotype:protein_coding]; Synthetic construct Mus musculus clone IMAGE:100062268, MGC:190442 phosphatidylcholine transfer protein (Pctp) mRNA, encodes complete protein.; phosphatidylcholine transfer protein ; phosphatidylcholine transfe…	chr11	coding
TC1100003561.mm.1	8.52673	7.42709	2.14302	0.00354122	76408	Abcc3	ATP-binding cassette, sub-family C (CFTR/MRP), member 3; ATP-binding cassette, sub-family C (CFTR/MRP), member 3	NM_029600; ENSMUST00000021231; ENSMUST00000126566; ENSMUST00000140985; ENSMUST00000151124; ENSMUST00000155253; ENSMUST00000178136; BC150788; NM_029600.3; OTTMUST00000003816; OTTMUST00000003817; OTTMUST00000003818; OTTMUST00000003819; OTTMUST00000003820; uc007kym.1; uc007kyn.1; uc007kyo.1; uc011ycu.1	RefSeq; ENSEMBL; GenBank; MGI/Jackson Lab; Havana transcript; UCSC Genes	Mus musculus ATP-binding cassette, sub-family C (CFTR/MRP), member 3 (Abcc3), mRNA.; ATP-binding cassette, sub-family C (CFTR/MRP), member 3 [gene_biotype:protein_coding transcript_biotype:protein_coding]; ATP-binding cassette, sub-family C (CFTR/MRP), member 3 [gene_biotype:protein_coding transcript_biotype:processed_transcript]; Mus musculus ATP-binding cassette, sub-family C (CFTR/MRP), member…	chr11	coding
TC1100003688.mm.1	5.41035	6.84993	-2.71243	0.00139493	217166	Nr1d1	nuclear receptor subfamily 1, group D, member 1; nuclear receptor subfamily 1, group D, member 1	NM_145434; ENSMUST00000064941; ENSMUST00000139220; BC008989; NM_145434.3; OTTMUST00000014594; OTTMUST00000014595; uc007lhh.1; uc029rnz.1	RefSeq; ENSEMBL; GenBank; MGI/Jackson Lab; Havana transcript; UCSC Genes	Mus musculus nuclear receptor subfamily 1, group D, member 1 (Nr1d1), mRNA.; nuclear receptor subfamily 1, group D, member 1 [gene_biotype:protein_coding transcript_biotype:protein_coding]; nuclear receptor subfamily 1, group D, member 1 [gene_biotype:protein_coding transcript_biotype:processed_transcript]; Mus musculus nuclear receptor subfamily 1, group D, member 1, mRNA (cDNA clone MGC:6402 IM…	chr11	coding
TC1100003811.mm.1	8.28665	9.16475	-1.83794	0.033781		Gm23971	predicted gene, 23971 [Source:MGI Symbol;Acc:MGI:5453748]	ENSMUST00000083317	ENSEMBL	predicted gene, 23971 [gene_biotype:snRNA transcript_biotype:snRNA]	chr11	ncrna
TC1100003924.mm.1	3.87991	4.73779	-1.81238	0.0145459				NONMMUT012372	NONCODE	Non-coding transcript identified by NONCODE: Linc	chr11	ncrna
TC1100003999.mm.1	6.67704	5.84628	1.77863	0.0041773	217258	Abca8a	ATP-binding cassette, sub-family A (ABC1), member 8a; Synthetic construct Mus musculus clone IMAGE:100069476, MGC:199378 ATP-binding cassette, sub-family A (ABC1), member 8a (Abca8a) mRNA, encodes complete protein.; ATP-binding cassette, sub-family A (ABC1), member 8a	NM_153145; ENSMUST00000046223; ENSMUST00000100287; ENSMUST00000106662; ENSMUST00000106664; ENSMUST00000129810; ENSMUST00000141279; ENSMUST00000146635; ENSMUST00000154849; BC172668; NM_153145.4; OTTMUST00000006712; OTTMUST00000006713; OTTMUST00000006714; OTTMUST00000006715; OTTMUST00000006716; OTTMUST00000006717; NONMMUT012549; NONMMUT012550; NONMMUT012551; NONMMUT012552; uc007mdf.1; uc007mdg.2; u…	RefSeq; ENSEMBL; GenBank; MGI/Jackson Lab; Havana transcript; NONCODE; UCSC Genes	Mus musculus ATP-binding cassette, sub-family A (ABC1), member 8a (Abca8a), mRNA.; ATP-binding cassette, sub-family A (ABC1), member 8a [gene_biotype:protein_coding transcript_biotype:protein_coding]; ATP-binding cassette, sub-family A (ABC1), member 8a [gene_biotype:protein_coding transcript_biotype:processed_transcript]; Synthetic construct Mus musculus clone IMAGE:100069476, MGC:199378 ATP-bin…	chr11	coding
TC1100004107.mm.1	10.8827	10.1461	1.66627	0.00242207	11430	Acox1	acyl-Coenzyme A oxidase 1, palmitoyl; acyl-Coenzyme A oxidase 1, palmitoyl ; acyl-Coenzyme A oxidase 1, palmitoyl (Acox1), mRNA.	NM_001271898; NM_015729; ENSMUST00000066587; ENSMUST00000072948; ENSMUST00000124684; ENSMUST00000128793; ENSMUST00000130229; ENSMUST00000148601; ENSMUST00000150549; BC056448; NM_015729.2; OTTMUST00000008212; OTTMUST00000008213; OTTMUST00000008214; OTTMUST00000008215; OTTMUST00000008216; OTTMUST00000008217; OTTMUST00000008218; uc007mkj.1; uc007mkk.1; uc007mkl.1; uc007mkm.1; NONMMUT012799; NONMMUT0…	RefSeq; ENSEMBL; GenBank; MGI/Jackson Lab; Havana transcript; UCSC Genes; NONCODE	Mus musculus acyl-Coenzyme A oxidase 1, palmitoyl (Acox1), transcript variant 2, mRNA.; Mus musculus acyl-Coenzyme A oxidase 1, palmitoyl (Acox1), transcript variant 1, mRNA.; acyl-Coenzyme A oxidase 1, palmitoyl [gene_biotype:protein_coding transcript_biotype:protein_coding]; acyl-Coenzyme A oxidase 1, palmitoyl [gene_biotype:protein_coding transcript_biotype:processed_transcript]; Mus musculus …	chr11	coding
TC1100004154.mm.1	3.44625	4.11041	-1.58464	0.0183029				NONMMUT012957	NONCODE	Non-coding transcript identified by NONCODE: Sense No Exonic	chr11	ncrna
TC1200000114.mm.1	4.95489	5.54154	-1.50176	0.0299929		Gm9847	predicted pseudogene 9847 [Source:MGI Symbol;Acc:MGI:3642840]	ENSMUST00000052528	ENSEMBL	predicted pseudogene 9847 [gene_biotype:protein_coding transcript_biotype:protein_coding]	chr12	ncrna
TC1200000142.mm.1	6.74684	6.04715	1.62416	0.00584339	18263	Odc1	ornithine decarboxylase, structural 1; ornithine decarboxylase, structural 1	NM_013614; ENSMUST00000171737; BC033264; BC059826; BC083122; NM_013614.2; uc007ncv.1	RefSeq; ENSEMBL; GenBank; MGI/Jackson Lab; UCSC Genes	Mus musculus ornithine decarboxylase, structural 1 (Odc1), mRNA.; ornithine decarboxylase, structural 1 [gene_biotype:protein_coding transcript_biotype:protein_coding]; Mus musculus ornithine decarboxylase, structural 1, mRNA (cDNA clone MGC:25367 IMAGE:2645291), complete cds.; Mus musculus ornithine decarboxylase, structural 1, mRNA (cDNA clone MGC:69610 IMAGE:6808137), complete cds.; Mus muscul…	chr12	coding
TC1200000143.mm.1	8.01283	6.982	2.0432	0.00811283		Gm22748	predicted gene, 22748 [Source:MGI Symbol;Acc:MGI:5452525]	ENSMUST00000082493	ENSEMBL	predicted gene, 22748 [gene_biotype:snoRNA transcript_biotype:snoRNA]	chr12	ncrna
TC1200000242.mm.1	4.66552	3.24314	2.68027	0.00651236				NONMMUT013782	NONCODE	Non-coding transcript identified by NONCODE: Linc	chr12	ncrna
TC1200000243.mm.1	5.4282	4.01262	2.66767	0.00613085				KnowTID_00001391	Luo lincRNA	Non-coding transcript identified by Luo, et al.	chr12	ncrna
TC1200000244.mm.1	5.45022	4.28259	2.24642	0.016413				KnowTID_00001392; NONMMUT013784	Luo lincRNA; NONCODE	Non-coding transcript identified by Luo, et al.; Non-coding transcript identified by NONCODE: Linc	chr12	ncrna
TC1200000280.mm.1	4.00401	4.73933	-1.66476	0.0436017	100504486	Gdap10	ganglioside-induced differentiation-associated-protein 10	NR_045032; BC052902; ENSMUST00000180613; NONMMUT013861; NONMMUT013862; uc029rrt.1	RefSeq; GenBank; ENSEMBL; NONCODE; UCSC Genes	Mus musculus ganglioside-induced differentiation-associated-protein 10 (Gdap10), long non-coding RNA.; Mus musculus ganglioside-induced differentiation-associated-protein 10, mRNA (cDNA clone MGC:60602 IMAGE:30067675), complete cds.; ganglioside-induced differentiation-associated-protein 10 [gene_biotype:lincRNA transcript_biotype:lincRNA]; Non-coding transcript identified by NONCODE: Sense No Ex…	chr12	ncrna
TC1200000334.mm.1	7.44114	6.60198	1.78901	0.00121152	319660	Agmo	alkylglycerol monooxygenase; alkylglycerol monooxygenase	NM_178767; ENSMUST00000049874; ENSMUST00000159998; ENSMUST00000160158; ENSMUST00000160390; ENSMUST00000160768; NM_178767.5; OTTMUST00000088754; OTTMUST00000088755; OTTMUST00000088756; OTTMUST00000088757; OTTMUST00000088758; BC148840; NONMMUT013977; uc007nkg.1; uc007nkh.1	RefSeq; ENSEMBL; MGI/Jackson Lab; Havana transcript; GenBank; NONCODE; UCSC Genes	Mus musculus alkylglycerol monooxygenase (Agmo), mRNA.; alkylglycerol monooxygenase [gene_biotype:protein_coding transcript_biotype:protein_coding]; alkylglycerol monooxygenase [gene_biotype:protein_coding transcript_biotype:nonsense_mediated_decay]; alkylglycerol monooxygenase [gene_biotype:protein_coding transcript_biotype:retained_intron]; alkylglycerol monooxygenase ; transmembrane protein 19…	chr12	coding
TC1200000450.mm.1	11.1249	11.7772	-1.57164	0.0368361		Gm22513	predicted gene, 22513 [Source:MGI Symbol;Acc:MGI:5452290]	ENSMUST00000179621	ENSEMBL	predicted gene, 22513 [gene_biotype:snRNA transcript_biotype:snRNA]	chr12	ncrna
TC1200000499.mm.1	5.91601	6.61998	-1.62898	0.0311054		Gm22973	predicted gene, 22973 [Source:MGI Symbol;Acc:MGI:5452750]	ENSMUST00000083298	ENSEMBL	predicted gene, 22973 [gene_biotype:snRNA transcript_biotype:snRNA]	chr12	ncrna
TC1200000702.mm.1	6.39613	5.62511	1.70647	0.00140369				NONMMUT014761	NONCODE	Non-coding transcript identified by NONCODE: Sense No Exonic	chr12	ncrna
TC1200000703.mm.1	5.75171	5.15759	1.50956	0.00389707				NONMMUT014762	NONCODE	Non-coding transcript identified by NONCODE: Sense No Exonic	chr12	ncrna
TC1200000720.mm.1	3.03295	3.88304	-1.80261	0.0334719				NONMMUT014788	NONCODE	Non-coding transcript identified by NONCODE: Sense No Exonic	chr12	ncrna
TC1200000722.mm.1	2.54415	3.69093	-2.21419	0.0145475				NONMMUT014791; NONMMUT014792	NONCODE	Non-coding transcript identified by NONCODE: Sense No Exonic	chr12	ncrna
TC1200000724.mm.1	2.1948	3.36587	-2.2518	0.0136391				NONMMUT014794	NONCODE	Non-coding transcript identified by NONCODE: Sense No Exonic	chr12	ncrna
TC1200000797.mm.1	7.55174	5.33989	4.63269	0.0062207	171210	Acot2	acyl-CoA thioesterase 2; acyl-CoA thioesterase 2	NM_134188; ENSMUST00000021649; BC064469; NM_134188.3; OTTMUST00000068307; uc011yor.1	RefSeq; ENSEMBL; GenBank; MGI/Jackson Lab; Havana transcript; UCSC Genes	Mus musculus acyl-CoA thioesterase 2 (Acot2), mRNA.; acyl-CoA thioesterase 2 [gene_biotype:protein_coding transcript_biotype:protein_coding]; Mus musculus acyl-CoA thioesterase 2, mRNA (cDNA clone MGC:69985 IMAGE:6508650), complete cds.; acyl-CoA thioesterase 2 ; acyl-CoA thioesterase 2[gene_biotype:protein_coding transcript_biotype:protein_coding]	chr12	coding
TC1200000798.mm.1	8.29986	5.09653	9.21084	0.000784115	26897	Acot1	acyl-CoA thioesterase 1; acyl-CoA thioesterase 1	NM_012006; ENSMUST00000168120; BC028261; NM_012006.2; uc007oeb.1	RefSeq; ENSEMBL; GenBank; MGI/Jackson Lab; UCSC Genes	Mus musculus acyl-CoA thioesterase 1 (Acot1), mRNA.; acyl-CoA thioesterase 1 [gene_biotype:protein_coding transcript_biotype:protein_coding]; Mus musculus acyl-CoA thioesterase 1, mRNA (cDNA clone MGC:40635 IMAGE:5100478), complete cds.; acyl-CoA thioesterase 1	chr12	coding
TC1200000799.mm.1	5.98048	4.22161	3.38432	0.00368984	171282	Acot4	acyl-CoA thioesterase 4; acyl-CoA thioesterase 4	NM_134247; ENSMUST00000021652; ENSMUST00000128162; BC113185; NM_134247.3; OTTMUST00000068312; OTTMUST00000068319; uc007oed.1	RefSeq; ENSEMBL; GenBank; MGI/Jackson Lab; Havana transcript; UCSC Genes	Mus musculus acyl-CoA thioesterase 4 (Acot4), mRNA.; acyl-CoA thioesterase 4 [gene_biotype:protein_coding transcript_biotype:protein_coding]; acyl-CoA thioesterase 4 [gene_biotype:protein_coding transcript_biotype:retained_intron]; Mus musculus acyl-CoA thioesterase 4, mRNA (cDNA clone MGC:132946 IMAGE:40061800), complete cds.; acyl-CoA thioesterase 4 ; acyl-CoA thioesterase 4[gene_biotype:protei…	chr12	coding
TC1200000800.mm.1	4.61381	2.55898	4.15495	0.00767605	171281	Acot3	acyl-CoA thioesterase 3; acyl-CoA thioesterase 3	NM_134246; ENSMUST00000021653; ENSMUST00000120927; BC138741; BC138743; NM_134246.3; OTTMUST00000068317; OTTMUST00000068318; uc007oef.1; uc007oeg.1	RefSeq; ENSEMBL; GenBank; MGI/Jackson Lab; Havana transcript; UCSC Genes	Mus musculus acyl-CoA thioesterase 3 (Acot3), mRNA.; acyl-CoA thioesterase 3 [gene_biotype:protein_coding transcript_biotype:protein_coding]; Mus musculus acyl-CoA thioesterase 3, mRNA (cDNA clone MGC:170368 IMAGE:8861763), complete cds.; Mus musculus acyl-CoA thioesterase 3, mRNA (cDNA clone MGC:170370 IMAGE:8861765), complete cds.; acyl-CoA thioesterase 3 ; acyl-CoA thioesterase 3[gene_biotype:…	chr12	coding
TC1200000936.mm.1	4.26839	4.93038	-1.58226	0.0299972		n-R5s65	nuclear encoded rRNA 5S 65 [Source:MGI Symbol;Acc:MGI:4421910]	ENSMUST00000082614	ENSEMBL	nuclear encoded rRNA 5S 65 [gene_biotype:rRNA transcript_biotype:rRNA]	chr12	ncrna
TC1200001035.mm.1	7.4973	8.34588	-1.80073	0.0499928	321018	Serpina4-ps1	serine (or cysteine) peptidase inhibitor, clade A, member 4, pseudogene 1	NR_002861; OTTMUST00000090569; ENSMUST00000166601; uc007owq.2; uc011yrc.1; uc011yrd.1	RefSeq; Havana transcript; ENSEMBL; UCSC Genes	Mus musculus serine (or cysteine) peptidase inhibitor, clade A, member 4, pseudogene 1 (Serpina4-ps1), non-coding RNA.; serine (or cysteine) peptidase inhibitor, clade A (Serpina) pseudogene[gene_biotype:unprocessed_pseudogene transcript_biotype:unprocessed_pseudogene]; serine (or cysteine) peptidase inhibitor, clade A, member 4, pseudogene 1 [gene_biotype:unprocessed_pseudogene transcript_biotyp…	chr12	ncrna
TC1200001281.mm.1	7.27433	6.63795	1.55442	0.00999808	68337	Crip2	cysteine rich protein 2; cysteine rich protein 2	NM_024223; ENSMUST00000084882; BC002093; BC002096; NM_024223.2; uc007pfy.2	RefSeq; ENSEMBL; GenBank; MGI/Jackson Lab; UCSC Genes	Mus musculus cysteine rich protein 2 (Crip2), mRNA.; cysteine rich protein 2 [gene_biotype:protein_coding transcript_biotype:protein_coding]; Mus musculus cysteine rich protein 2, mRNA (cDNA clone MGC:6346 IMAGE:3489018), complete cds.; Mus musculus cysteine rich protein 2, mRNA (cDNA clone MGC:6358 IMAGE:3493903), complete cds.; cysteine rich protein 2	chr12	coding
TC1200001321.mm.1	3.59992	2.8347	1.69962	0.030327				NONMMUT016153	NONCODE	Non-coding transcript identified by NONCODE: Sense No Exonic	chr12	ncrna
TC1200001485.mm.1	5.42658	6.0382	-1.52798	0.000552713		Zfp125	zinc finger protein 125 [Source:MGI Symbol;Acc:MGI:1336211]	ENSMUST00000079237	ENSEMBL	zinc finger protein 125 [gene_biotype:protein_coding transcript_biotype:protein_coding]	chr12	ncrna
TC1200001584.mm.1	2.55785	3.22753	-1.59072	0.0414409				NONMMUT013816	NONCODE	Non-coding transcript identified by NONCODE: Sense No Exonic	chr12	ncrna
TC1200001592.mm.1	6.49364	5.23356	2.39509	0.00940241		Gm24613	predicted gene, 24613 [Source:MGI Symbol;Acc:MGI:5454390]	ENSMUST00000083266	ENSEMBL	predicted gene, 24613 [gene_biotype:snoRNA transcript_biotype:snoRNA]	chr12	ncrna
TC1200001594.mm.1	5.40444	4.68689	1.64438	0.00995289	104836	Cbll1	Casitas B-lineage lymphoma-like 1; Casitas B-lineage lymphoma-like 1	NM_001253847; NM_001253848; NM_134048; ENSMUST00000064240; ENSMUST00000085487; ENSMUST00000101499; BC019529; NM_001253847.1; NM_001253848.1; NM_134048.2; uc007nhl.2; uc007nhm.2; uc007nhn.2	RefSeq; ENSEMBL; GenBank; MGI/Jackson Lab; UCSC Genes	Mus musculus Casitas B-lineage lymphoma-like 1 (Cbll1), transcript variant 1, mRNA.; Mus musculus Casitas B-lineage lymphoma-like 1 (Cbll1), transcript variant 3, mRNA.; Mus musculus Casitas B-lineage lymphoma-like 1 (Cbll1), transcript variant 2, mRNA.; Casitas B-lineage lymphoma-like 1 [gene_biotype:protein_coding transcript_biotype:protein_coding]; Mus musculus Casitas B-lineage lymphoma-like …	chr12	coding
TC1200001611.mm.1	4.83337	2.34543	5.60977	0.0335878				KnowTID_00001568; NONMMUT013860	Luo lincRNA; NONCODE	Non-coding transcript identified by Luo, et al.; Non-coding transcript identified by NONCODE: Linc	chr12	ncrna
TC1200001736.mm.1	4.50397	5.23317	-1.65772	0.0159441		n-R5s58	nuclear encoded rRNA 5S 58 [Source:MGI Symbol;Acc:MGI:4421903]	ENSMUST00000093682	ENSEMBL	nuclear encoded rRNA 5S 58 [gene_biotype:rRNA transcript_biotype:rRNA]	chr12	ncrna
TC1200001855.mm.1	3.99601	4.8107	-1.75892	0.00810437		n-R5s60	nuclear encoded rRNA 5S 60 [Source:MGI Symbol;Acc:MGI:4421905]	ENSMUST00000083299	ENSEMBL	nuclear encoded rRNA 5S 60 [gene_biotype:rRNA transcript_biotype:rRNA]	chr12	ncrna
TC1200001894.mm.1	2.79305	4.15738	-2.57457	0.000327415				NONMMUT014565	NONCODE	Non-coding transcript identified by NONCODE: Linc	chr12	ncrna
TC1200002050.mm.1	3.91371	3.32305	1.50594	0.0277977				NONMMUT014966	NONCODE	Non-coding transcript identified by NONCODE: Sense No Exonic	chr12	ncrna
TC1200002051.mm.1	6.80126	5.80698	1.99209	0.0396621				NONMMUT014967	NONCODE	Non-coding transcript identified by NONCODE: Sense No Exonic	chr12	ncrna
TC1200002078.mm.1	9.2609	8.62196	1.55718	0.0130025	104776	Aldh6a1	aldehyde dehydrogenase family 6, subfamily A1; aldehyde dehydrogenase family 6, subfamily A1	NM_134042; ENSMUST00000085192; BC031148; BC033440; NM_134042.2; uc007ofk.2	RefSeq; ENSEMBL; GenBank; MGI/Jackson Lab; UCSC Genes	Mus musculus aldehyde dehydrogenase family 6, subfamily A1 (Aldh6a1), transcript variant 1, mRNA.; aldehyde dehydrogenase family 6, subfamily A1 [gene_biotype:protein_coding transcript_biotype:protein_coding]; Mus musculus aldehyde dehydrogenase family 6, subfamily A1, mRNA (cDNA clone MGC:37325 IMAGE:4975560), complete cds.; Mus musculus aldehyde dehydrogenase family 6, subfamily A1, mRNA (cDNA …	chr12	coding
TC1200002083.mm.1	7.40337	6.64488	1.69172	0.0300086	68497	Arel1	apoptosis resistant E3 ubiquitin protein ligase 1; apoptosis resistant E3 ubiquitin protein ligase 1	NM_178065; ENSMUST00000043169; ENSMUST00000163231; ENSMUST00000163372; ENSMUST00000165093; ENSMUST00000165886; ENSMUST00000167448; ENSMUST00000168713; ENSMUST00000169161; BC060658; NM_178065.4; OTTMUST00000090851; OTTMUST00000090852; OTTMUST00000090853; OTTMUST00000090854; OTTMUST00000090855; OTTMUST00000090856; OTTMUST00000090862; OTTMUST00000090863; ENSMUST00000116345; OTTMUST00000090864; NONMM…	RefSeq; ENSEMBL; GenBank; MGI/Jackson Lab; Havana transcript; NONCODE; UCSC Genes	Mus musculus apoptosis resistant E3 ubiquitin protein ligase 1 (Arel1), mRNA.; apoptosis resistant E3 ubiquitin protein ligase 1 [gene_biotype:protein_coding transcript_biotype:protein_coding]; apoptosis resistant E3 ubiquitin protein ligase 1 [gene_biotype:protein_coding transcript_biotype:nonsense_mediated_decay]; apoptosis resistant E3 ubiquitin protein ligase 1 [gene_biotype:protein_coding tr…	chr12	coding
TC1200002099.mm.1	6.20187	7.08994	-1.8507	0.0294077		n-R5s64	nuclear encoded rRNA 5S 64 [Source:MGI Symbol;Acc:MGI:4421909]	ENSMUST00000102019	ENSEMBL	nuclear encoded rRNA 5S 64 [gene_biotype:rRNA transcript_biotype:rRNA]	chr12	ncrna
TC1200002158.mm.1	7.62717	7.03731	1.5051	0.00447047	20338	Sel1l	sel-1 suppressor of lin-12-like (C. elegans); sel-1 suppressor of lin-12-like (C. elegans)	NM_001039089; NM_011344; ENSMUST00000021347; ENSMUST00000165282; ENSMUST00000166691; ENSMUST00000167466; ENSMUST00000167594; ENSMUST00000169843; ENSMUST00000171465; ENSMUST00000171959; ENSMUST00000172246; ENSMUST00000178462; BC026816; NM_001039089.1; NM_011344.2; OTTMUST00000091086; OTTMUST00000091087; OTTMUST00000091088; OTTMUST00000091157; OTTMUST00000091158; OTTMUST00000091159; OTTMUST00000091…	RefSeq; ENSEMBL; GenBank; MGI/Jackson Lab; Havana transcript; NONCODE; UCSC Genes	Mus musculus sel-1 suppressor of lin-12-like (C. elegans) (Sel1l), transcript variant 1, mRNA.; Mus musculus sel-1 suppressor of lin-12-like (C. elegans) (Sel1l), transcript variant 2, mRNA.; sel-1 suppressor of lin-12-like (C. elegans) [gene_biotype:protein_coding transcript_biotype:protein_coding]; sel-1 suppressor of lin-12-like (C. elegans) [gene_biotype:protein_coding transcript_biotype:proc…	chr12	coding
TC1200002516.mm.1	7.29686	8.1753	-1.83839	0.0139539		Gm25675	predicted gene, 25675 [Source:MGI Symbol;Acc:MGI:5455452]	ENSMUST00000174979	ENSEMBL	predicted gene, 25675 [gene_biotype:rRNA transcript_biotype:rRNA]	chr12	ncrna
TC1300000024.mm.1	9.3163	8.68988	1.54374	0.0225043		Rpl29-ps2	ribosomal protein L29, pseudogene 2 [Source:MGI Symbol;Acc:MGI:3648624]	ENSMUST00000086508; NONMMUT016245	ENSEMBL; NONCODE	ribosomal protein L29, pseudogene 2 [gene_biotype:processed_pseudogene transcript_biotype:processed_pseudogene]; Non-coding transcript identified by NONCODE: Linc	chr13	ncrna
TC1300000045.mm.1	4.15677	5.80814	-3.14131	0.000814091	319554	Idi1	isopentenyl-diphosphate delta isomerase; isopentenyl-diphosphate delta isomerase	NM_145360; ENSMUST00000169314; ENSMUST00000176851; ENSMUST00000177397; ENSMUST00000177400; ENSMUST00000177447; BC004801; BC110313; NM_145360.2; OTTMUST00000104162; OTTMUST00000104163; OTTMUST00000104164; OTTMUST00000104165; OTTMUST00000104166; uc007pkn.2	RefSeq; ENSEMBL; GenBank; MGI/Jackson Lab; Havana transcript; UCSC Genes	Mus musculus isopentenyl-diphosphate delta isomerase (Idi1), mRNA.; isopentenyl-diphosphate delta isomerase [gene_biotype:protein_coding transcript_biotype:protein_coding]; isopentenyl-diphosphate delta isomerase [gene_biotype:protein_coding transcript_biotype:retained_intron]; Mus musculus isopentenyl-diphosphate delta isomerase, mRNA (cDNA clone MGC:8139 IMAGE:3589498), complete cds.; Mus muscu…	chr13	coding
TC1300000359.mm.1	5.60647	5.00671	1.51547	0.00512994	78903	Wrnip1	Werner helicase interacting protein 1; Werner helicase interacting protein 1	NM_030215; ENSMUST00000021832; BC010482; NM_030215.3; OTTMUST00000001325; uc007pzs.2; uc007pzt.2; uc011yyb.1	RefSeq; ENSEMBL; GenBank; MGI/Jackson Lab; Havana transcript; UCSC Genes	Mus musculus Werner helicase interacting protein 1 (Wrnip1), mRNA.; Werner helicase interacting protein 1 [gene_biotype:protein_coding transcript_biotype:protein_coding]; Mus musculus Werner helicase interacting protein 1, mRNA (cDNA clone MGC:19428 IMAGE:3492125), complete cds.; Werner helicase interacting protein 1 ; Werner helicase interacting protein 1[gene_biotype:protein_coding transcript_b…	chr13	coding
TC1300000389.mm.1	7.12499	5.98259	2.20748	0.0296553		LOC100862316	PREDICTED: uncharacterized LOC100862316 (LOC100862316), miscRNA.	XR_141153.1	MGI/Jackson Lab	PREDICTED: uncharacterized LOC100862316 (LOC100862316), miscRNA.	chr13	ncrna
TC1300000406.mm.1	9.13374	9.91506	-1.7187	0.0387178		Gm22126	predicted gene, 22126 [Source:MGI Symbol;Acc:MGI:5451903]	ENSMUST00000083244	ENSEMBL	predicted gene, 22126 [gene_biotype:snRNA transcript_biotype:snRNA]	chr13	ncrna
TC1300000569.mm.1	2.74255	1.94905	1.73328	0.024935	18295	Ogn	osteoglycin; osteoglycin	NM_008760; ENSMUST00000021822; BC021939; NM_008760.4; uc007qjr.1; uc007qjs.1	RefSeq; ENSEMBL; GenBank; MGI/Jackson Lab; UCSC Genes	Mus musculus osteoglycin (Ogn), mRNA.; osteoglycin [gene_biotype:protein_coding transcript_biotype:protein_coding]; Mus musculus osteoglycin, mRNA (cDNA clone MGC:36151 IMAGE:5067073), complete cds.; osteoglycin	chr13	coding
TC1300000633.mm.1	8.98289	8.26385	1.64608	0.030476	67044	Higd2a	HIG1 domain family, member 2A; HIG1 domain family, member 2A	NM_025933; ENSMUST00000026986; BC021471; NM_025933.3; OTTMUST00000081337; uc007qol.1	RefSeq; ENSEMBL; GenBank; MGI/Jackson Lab; Havana transcript; UCSC Genes	Mus musculus HIG1 domain family, member 2A (Higd2a), mRNA.; HIG1 domain family, member 2A [gene_biotype:protein_coding transcript_biotype:protein_coding]; Mus musculus HIG1 domain family, member 2A, mRNA (cDNA clone MGC:35692 IMAGE:5343356), complete cds.; HIG1 domain family, member 2A ; HIG1 domain family, member 2[gene_biotype:protein_coding transcript_biotype:protein_coding]	chr13	coding
TC1300000917.mm.1	5.03592	5.64787	-1.52833	0.037012				KnowTID_00001880; NONMMUT018370	Luo lincRNA; NONCODE	Non-coding transcript identified by Luo, et al.; Non-coding transcript identified by NONCODE: Linc	chr13	ncrna
TC1300000919.mm.1	6.98612	5.96005	2.03647	0.00779883	93692	Glrx	glutaredoxin; glutaredoxin	NM_053108; ENSMUST00000022082; BC012642; NM_053108.4; OTTMUST00000049564; uc007rfx.2	RefSeq; ENSEMBL; GenBank; MGI/Jackson Lab; Havana transcript; UCSC Genes	Mus musculus glutaredoxin (Glrx), mRNA.; glutaredoxin [gene_biotype:protein_coding transcript_biotype:protein_coding]; Mus musculus glutaredoxin, mRNA (cDNA clone MGC:13744 IMAGE:4206114), complete cds.; glutaredoxin ; glutaredoxin[gene_biotype:protein_coding transcript_biotype:protein_coding]	chr13	coding
TC1300000966.mm.1	4.24935	3.64207	1.52339	0.0329362				NONMMUT018470	NONCODE	Non-coding transcript identified by NONCODE: Linc	chr13	ncrna
TC1300001028.mm.1	8.68125	7.76095	1.89251	0.0005775	74156	Acot12	acyl-CoA thioesterase 12; acyl-CoA thioesterase 12	NM_028790; ENSMUST00000022120; ENSMUST00000159214; ENSMUST00000161337; BC132050; BC137996; NM_028790.3; OTTMUST00000059016; OTTMUST00000059759; OTTMUST00000059761; uc007rka.1	RefSeq; ENSEMBL; GenBank; MGI/Jackson Lab; Havana transcript; UCSC Genes	Mus musculus acyl-CoA thioesterase 12 (Acot12), mRNA.; acyl-CoA thioesterase 12 [gene_biotype:protein_coding transcript_biotype:protein_coding]; acyl-CoA thioesterase 12 [gene_biotype:protein_coding transcript_biotype:processed_transcript]; acyl-CoA thioesterase 12 [gene_biotype:protein_coding transcript_biotype:retained_intron]; Mus musculus acyl-CoA thioesterase 12, mRNA (cDNA clone MGC:163681 …	chr13	coding
TC1300001227.mm.1	4.28373	3.63918	1.56325	0.0361023				NONMMUT019243; NONMMUT019244	NONCODE	Non-coding transcript identified by NONCODE: Sense No Exonic	chr13	ncrna
TC1300001232.mm.1	3.27273	2.45418	1.76364	0.0301314				NONMMUT019250	NONCODE	Non-coding transcript identified by NONCODE: Sense No Exonic	chr13	ncrna
TC1300001270.mm.1	5.5941	4.91106	1.60552	0.0202211	19012	Plpp1	phospholipid phosphatase 1	NM_008247; NM_008903; ENSMUST00000016144; ENSMUST00000070951; BC061161; NM_008247.2; NM_008903.1; uc007rwq.1; uc007rwr.1	RefSeq; ENSEMBL; GenBank; MGI/Jackson Lab; UCSC Genes	Mus musculus phosphatidic acid phosphatase type 2A (Ppap2a), transcript variant 1, mRNA.; Mus musculus phosphatidic acid phosphatase type 2A (Ppap2a), transcript variant 2, mRNA.; phosphatidic acid phosphatase type 2A [gene_biotype:protein_coding transcript_biotype:protein_coding]; Mus musculus phosphatidic acid phosphatase type 2A, mRNA (cDNA clone MGC:74298 IMAGE:6707837), complete cds.; phosph…	chr13	coding
TC1300001446.mm.1	6.2351	5.53104	1.62909	0.009066	100039826	Gm2444	PREDICTED: predicted gene 2444 (Gm2444), mRNA.	XM_001473616.1	MGI/Jackson Lab	PREDICTED: predicted gene 2444 (Gm2444), mRNA.	chr13	ncrna
TC1300001494.mm.1	6.04069	5.40091	1.55809	0.0176877	192136	Sugct	succinyl-CoA glutarate-CoA transferase	NM_138654; ENSMUST00000068545; BC055852; NM_138654.3; NONMMUT016485; uc007pnx.3; uc007pny.2; uc007pnz.1	RefSeq; ENSEMBL; GenBank; MGI/Jackson Lab; NONCODE; UCSC Genes	Mus musculus succinyl-CoA glutarate-CoA transferase (Sugct), mRNA.; succinyl-CoA glutarate-CoA transferase [gene_biotype:protein_coding transcript_biotype:protein_coding]; Mus musculus RIKEN cDNA 5033411D12 gene, mRNA (cDNA clone MGC:67892 IMAGE:4221852), complete cds.; RIKEN cDNA 5033411D12 gene ; Non-coding transcript identified by NONCODE: Antisense,Sense No Exonic; Mus musculus adult male hyp…	chr13	coding
TC1300001656.mm.1	3.6961	4.50421	-1.75092	0.00281606				NONMMUT016690	NONCODE	Non-coding transcript identified by NONCODE: Sense No Exonic	chr13	ncrna
TC1300001657.mm.1	4.03543	4.71077	-1.59698	0.00275746				NONMMUT016692	NONCODE	Non-coding transcript identified by NONCODE: Sense No Exonic	chr13	ncrna
TC1300001658.mm.1	5.15246	6.1899	-2.05258	0.0150225		Gm11340	predicted gene 11340 [Source:MGI Symbol;Acc:MGI:3652096]	ENSMUST00000119226; NONMMUT016693; OTTMUST00000001185	ENSEMBL; NONCODE; Havana transcript	predicted gene 11340 [gene_biotype:processed_pseudogene transcript_biotype:processed_pseudogene]; Non-coding transcript identified by NONCODE: Linc; ribosomal protein S19 (Rps19) pseudogene[gene_biotype:processed_pseudogene transcript_biotype:processed_pseudogene]	chr13	ncrna
TC1300001659.mm.1	5.79841	6.65899	-1.81576	0.0344915				KnowTID_00002002; NONMMUT016694	Luo lincRNA; NONCODE	Non-coding transcript identified by Luo, et al.; Non-coding transcript identified by NONCODE: Linc	chr13	ncrna
TC1300001660.mm.1	5.72083	6.53147	-1.75399	0.0277826		Gm23340	predicted gene, 23340 [Source:MGI Symbol;Acc:MGI:5453117]	ENSMUST00000158955	ENSEMBL	predicted gene, 23340 [gene_biotype:snoRNA transcript_biotype:snoRNA]	chr13	ncrna
TC1300001682.mm.1	7.3356	6.57793	1.69077	0.0184813				uc029rzm.1	UCSC Genes	Mus musculus non-coding RNA, oocyte_piRNA1665, complete sequence.	chr13	ncrna
TC1300001779.mm.1	7.48667	5.52244	3.90204	0.00356153	22151	Tubb2a	tubulin, beta 2A class IIA; tubulin, beta 2A class IIA	NM_009450; ENSMUST00000056427; BC055441; NM_009450.2; uc007qbb.3	RefSeq; ENSEMBL; GenBank; MGI/Jackson Lab; UCSC Genes	Mus musculus tubulin, beta 2A class IIA (Tubb2a), mRNA.; tubulin, beta 2A class IIA [gene_biotype:protein_coding transcript_biotype:protein_coding]; Mus musculus tubulin, beta 2A, mRNA (cDNA clone MGC:65316 IMAGE:4016867), complete cds.; tubulin, beta 2A class IIA	chr13	coding
TC1300001794.mm.1	8.78596	7.98275	1.74498	0.00178871	23986	Eci2	enoyl-Coenzyme A delta isomerase 2; enoyl-Coenzyme A delta isomerase 2	NM_001110331; NM_011868; NR_073427; ENSMUST00000021854; ENSMUST00000084345; ENSMUST00000110251; ENSMUST00000163280; ENSMUST00000164421; ENSMUST00000166109; ENSMUST00000167036; ENSMUST00000169759; ENSMUST00000170538; ENSMUST00000170989; ENSMUST00000171229; ENSMUST00000171258; ENSMUST00000178421; BC001983; NM_001110331.1; NM_001110332.1; NM_011868.2; OTTMUST00000092189; OTTMUST00000092198; OTTMUST0…	RefSeq; ENSEMBL; GenBank; MGI/Jackson Lab; Havana transcript; UCSC Genes; NONCODE	Mus musculus enoyl-Coenzyme A delta isomerase 2 (Eci2), transcript variant 1, mRNA.; Mus musculus enoyl-Coenzyme A delta isomerase 2 (Eci2), transcript variant 2, mRNA.; Mus musculus enoyl-Coenzyme A delta isomerase 2 (Eci2), transcript variant 3, non-coding RNA.; enoyl-Coenzyme A delta isomerase 2 [gene_biotype:protein_coding transcript_biotype:protein_coding]; enoyl-Coenzyme A delta isomerase 2…	chr13	coding
TC1300002079.mm.1	5.07657	6.73289	-3.1521	0.000946541	57266	Cxcl14	chemokine (C-X-C motif) ligand 14; chemokine (C-X-C motif) ligand 14	NM_019568; ENSMUST00000021970; BC147274; BC147275; NM_019568.2; uc007qsm.2; uc011zab.2	RefSeq; ENSEMBL; GenBank; MGI/Jackson Lab; UCSC Genes	Mus musculus chemokine (C-X-C motif) ligand 14 (Cxcl14), mRNA.; chemokine (C-X-C motif) ligand 14 [gene_biotype:protein_coding transcript_biotype:protein_coding]; Mus musculus chemokine (C-X-C motif) ligand 14, mRNA (cDNA clone MGC:182427 IMAGE:9056321), complete cds.; Mus musculus chemokine (C-X-C motif) ligand 14, mRNA (cDNA clone MGC:182435 IMAGE:9056329), complete cds.; chemokine (C-X-C motif…	chr13	coding
TC1300002436.mm.1	11.129	10.3621	1.70162	0.0343933	12116	Bhmt	betaine-homocysteine methyltransferase; betaine-homocysteine methyltransferase	NM_016668; ENSMUST00000099309; ENSMUST00000124193; BC037004; BC093510; BC110307; NM_016668.3; OTTMUST00000059960; OTTMUST00000059961; uc007rli.1; uc007rlj.1	RefSeq; ENSEMBL; GenBank; MGI/Jackson Lab; Havana transcript; UCSC Genes	Mus musculus betaine-homocysteine methyltransferase (Bhmt), mRNA.; betaine-homocysteine methyltransferase [gene_biotype:protein_coding transcript_biotype:protein_coding]; betaine-homocysteine methyltransferase [gene_biotype:protein_coding transcript_biotype:retained_intron]; Mus musculus betaine-homocysteine methyltransferase, mRNA (cDNA clone MGC:46866 IMAGE:5100429), complete cds.; Mus musculus…	chr13	coding
TC1300002474.mm.1	4.89457	5.58267	-1.61115	0.0191748	15357	Hmgcr	3-hydroxy-3-methylglutaryl-Coenzyme A reductase; 3-hydroxy-3-methylglutaryl-Coenzyme A reductase	NM_008255; ENSMUST00000022176; ENSMUST00000163201; ENSMUST00000168374; ENSMUST00000168855; ENSMUST00000169196; ENSMUST00000169202; ENSMUST00000169945; ENSMUST00000169966; ENSMUST00000170287; ENSMUST00000171537; ENSMUST00000172440; BC085083; NM_008255.2; OTTMUST00000090933; OTTMUST00000090934; OTTMUST00000090935; OTTMUST00000090936; OTTMUST00000090937; OTTMUST00000090938; OTTMUST00000090939; OTTMU…	RefSeq; ENSEMBL; GenBank; MGI/Jackson Lab; Havana transcript; NONCODE; UCSC Genes	Mus musculus 3-hydroxy-3-methylglutaryl-Coenzyme A reductase (Hmgcr), mRNA.; 3-hydroxy-3-methylglutaryl-Coenzyme A reductase [gene_biotype:protein_coding transcript_biotype:protein_coding]; 3-hydroxy-3-methylglutaryl-Coenzyme A reductase [gene_biotype:protein_coding transcript_biotype:retained_intron]; 3-hydroxy-3-methylglutaryl-Coenzyme A reductase [gene_biotype:protein_coding transcript_biotype…	chr13	coding
TC1300002589.mm.1	5.65212	4.8026	1.80189	0.00261951				NONMMUT018997	NONCODE	Non-coding transcript identified by NONCODE: Sense No Exonic	chr13	ncrna
TC1400000072.mm.1	7.78121	6.53679	2.36925	0.00436045	66082	Abhd6	abhydrolase domain containing 6; abhydrolase domain containing 6	NM_025341; ENSMUST00000026313; ENSMUST00000166497; BC027011; NM_025341.3; uc007sen.1; uc007seo.1; uc007sep.1; uc011zfu.1	RefSeq; ENSEMBL; GenBank; MGI/Jackson Lab; UCSC Genes	Mus musculus abhydrolase domain containing 6 (Abhd6), mRNA.; abhydrolase domain containing 6 [gene_biotype:protein_coding transcript_biotype:protein_coding]; Mus musculus abhydrolase domain containing 6, mRNA (cDNA clone MGC:35771 IMAGE:5369937), complete cds.; abhydrolase domain containing 6	chr14	coding
TC1400000128.mm.1	3.63142	2.87024	1.69488	0.0107036				NONMMUT019722	NONCODE	Non-coding transcript identified by NONCODE: Sense No Exonic	chr14	ncrna
TC1400000145.mm.1	5.0762	5.68238	-1.52222	0.0348225		Gm6781	predicted gene 6781 [Source:MGI Symbol;Acc:MGI:3644510]	ENSMUST00000038304	ENSEMBL	predicted gene 6781 [gene_biotype:processed_pseudogene transcript_biotype:processed_pseudogene]	chr14	ncrna
TC1400000156.mm.1	4.75258	3.67211	2.11472	0.00559599				NONMMUT019795; NONMMUT019796; NONMMUT019797; NONMMUT019798; NONMMUT019799; NONMMUT019800; NONMMUT019801; NONMMUT019802; NONMMUT019803; NONMMUT019804; NONMMUT019805; NONMMUT019806; NONMMUT019807; NONMMUT019808; NONMMUT019809; NONMMUT019810; NONMMUT019811; NONMMUT019812; NONMMUT019813; NONMMUT019814; NONMMUT019815; NONMMUT019816; NONMMUT019817; NONMMUT019818; NONMMUT019819; NONMMUT019820; NONMMUT01…	NONCODE; Luo lincRNA	Non-coding transcript identified by NONCODE: Linc; Non-coding transcript identified by Luo, et al.	chr14	ncrna
TC1400000157.mm.1	4.15841	3.13579	2.03161	0.0232071				NONMMUT019826; NovelTID_00002103	NONCODE; Luo lincRNA	Non-coding transcript identified by NONCODE: Linc; Non-coding transcript identified by Luo, et al.	chr14	ncrna
TC1400000180.mm.1	6.2525	5.54882	1.62866	0.0298517				NONMMUT019888	NONCODE	Non-coding transcript identified by NONCODE: Sense No Exonic	chr14	ncrna
TC1400000186.mm.1	8.38019	7.60214	1.71481	0.0145728				NONMMUT019895	NONCODE	Non-coding transcript identified by NONCODE: Sense No Exonic	chr14	ncrna
TC1400000272.mm.1	2.39352	3.04597	-1.57184	0.0468484				NONMMUT020116	NONCODE	Non-coding transcript identified by NONCODE: Linc	chr14	ncrna
TC1400000273.mm.1	4.07665	4.88288	-1.74864	0.00234821				NONMMUT020120	NONCODE	Non-coding transcript identified by NONCODE: Sense No Exonic	chr14	ncrna
TC1400000322.mm.1	5.55932	4.52227	2.05203	0.00125945	70021	Nt5dc2	5-nucleotidase domain containing 2; 5'-nucleotidase domain containing 2 ; 5'-nucleotidase domain containing 2	NM_027289; ENSMUST00000090212; BC011230; NM_027289.1; uc007swt.1	RefSeq; ENSEMBL; GenBank; MGI/Jackson Lab; UCSC Genes	Mus musculus 5-nucleotidase domain containing 2 (Nt5dc2), mRNA.; 5'-nucleotidase domain containing 2 [gene_biotype:protein_coding transcript_biotype:protein_coding]; Mus musculus 5-nucleotidase domain containing 2, mRNA (cDNA clone MGC:19108 IMAGE:4207917), complete cds.; 5'-nucleotidase domain containing 2 ; Mus musculus 5'-nucleotidase domain containing 2 (Nt5dc2), mRNA.	chr14	coding
TC1400000374.mm.1	5.4898	4.80716	1.60508	0.031839				NONMMUT020333	NONCODE	Non-coding transcript identified by NONCODE: Sense No Exonic	chr14	ncrna
TC1400000375.mm.1	6.51859	5.63728	1.84205	0.0138144				NONMMUT020334	NONCODE	Non-coding transcript identified by NONCODE: Sense No Exonic	chr14	ncrna
TC1400000404.mm.1	9.44485	8.61611	1.77614	0.00280321		Eif1-ps1	eukaryotic translation initiation factor 1, pseudogene 1 [Source:MGI Symbol;Acc:MGI:3642383]	ENSMUST00000086606	ENSEMBL	eukaryotic translation initiation factor 1, pseudogene 1 [gene_biotype:processed_pseudogene transcript_biotype:processed_pseudogene]	chr14	ncrna
TC1400000470.mm.1	8.60101	7.92205	1.60099	0.0070921		Gm16439	predicted pseudogene 16439 [Source:MGI Symbol;Acc:MGI:3647611]	ENSMUST00000100687; OTTMUST00000093300	ENSEMBL; Havana transcript	predicted pseudogene 16439 [gene_biotype:processed_pseudogene transcript_biotype:processed_pseudogene]; BCL2/adenovirus E1B interacting protein 3 (Bnip3) pseudogene[gene_biotype:processed_pseudogene transcript_biotype:processed_pseudogene]	chr14	ncrna
TC1400000578.mm.1	6.84794	8.0353	-2.27736	0.0190897	11727; 58809	Ang; Rnase4	angiogenin, ribonuclease, RNase A family, 5; ribonuclease, RNase A family 4; angiogenin, ribonuclease, RNase A family, 5 ; ribonuclease, RNase A family 4	NM_001161731; NM_007447; NM_021472; NM_201239; ENSMUST00000022428; ENSMUST00000069011; ENSMUST00000169895; ENSMUST00000171688; BC005569; BC055355; BC061105; BC066843; NM_001161731.2; NM_007447.3; NM_021472.4; NM_201239.3; uc007tml.2; uc007tmm.2; uc007tmn.2; uc007tmo.2	RefSeq; ENSEMBL; GenBank; MGI/Jackson Lab; UCSC Genes	Mus musculus angiogenin, ribonuclease, RNase A family, 5 (Ang), transcript variant 2, mRNA.; Mus musculus angiogenin, ribonuclease, RNase A family, 5 (Ang), transcript variant 1, mRNA.; Mus musculus ribonuclease, RNase A family 4 (Rnase4), transcript variant 1, mRNA.; Mus musculus ribonuclease, RNase A family 4 (Rnase4), transcript variant 2, mRNA.; ribonuclease, RNase A family 4 [gene_biotype:pr…	chr14	coding
TC1400000777.mm.1	8.73811	8.07201	1.58677	0.00312422	28200	Dhrs4	dehydrogenase/reductase (SDR family) member 4; dehydrogenase/reductase (SDR family) member 4	NM_001037938; NM_030686; ENSMUST00000022821; BC003484; BC054361; NM_001037938.2; NM_030686.2; uc007tyl.2; uc007tym.2; uc007tyn.1	RefSeq; ENSEMBL; GenBank; MGI/Jackson Lab; UCSC Genes	Mus musculus dehydrogenase/reductase (SDR family) member 4 (Dhrs4), transcript variant 1, mRNA.; Mus musculus dehydrogenase/reductase (SDR family) member 4 (Dhrs4), transcript variant 2, mRNA.; dehydrogenase/reductase (SDR family) member 4 [gene_biotype:protein_coding transcript_biotype:protein_coding]; Mus musculus dehydrogenase/reductase (SDR family) member 4, mRNA (cDNA clone MGC:6560 IMAGE:28…	chr14	coding
TC1400000783.mm.1	6.58834	5.70536	1.84418	0.00727275	68680	Fitm1	fat storage-inducing transmembrane protein 1; fat storage-inducing transmembrane protein 1	NM_026808; ENSMUST00000022826; BC104408; BC104409; NM_026808.1; OTTMUST00000109993; uc007tzc.1	RefSeq; ENSEMBL; GenBank; MGI/Jackson Lab; Havana transcript; UCSC Genes	Mus musculus fat storage-inducing transmembrane protein 1 (Fitm1), mRNA.; fat storage-inducing transmembrane protein 1 [gene_biotype:protein_coding transcript_biotype:protein_coding]; Mus musculus RIKEN cDNA 1110028A07 gene, mRNA (cDNA clone MGC:129516 IMAGE:40050546), complete cds.; Mus musculus RIKEN cDNA 1110028A07 gene, mRNA (cDNA clone MGC:129517 IMAGE:40050547), complete cds.; fat storage-i…	chr14	coding
TC1400000822.mm.1	7.59352	6.09842	2.81882	0.00462077		Gm26440	predicted gene, 26440 [Source:MGI Symbol;Acc:MGI:5456217]	ENSMUST00000082591	ENSEMBL	predicted gene, 26440 [gene_biotype:snoRNA transcript_biotype:snoRNA]	chr14	ncrna
TC1400000839.mm.1	7.23505	6.5944	1.55904	0.00675707		Gm6913	predicted gene 6913 [Source:MGI Symbol;Acc:MGI:3648267]	ENSMUST00000100019; NONMMUT021103; OTTMUST00000081754	ENSEMBL; NONCODE; Havana transcript	predicted gene 6913 [gene_biotype:processed_pseudogene transcript_biotype:processed_pseudogene]; Non-coding transcript identified by NONCODE: Linc; eukaryotic translation initiation factor 1 (Eif1) pseudogene[gene_biotype:processed_pseudogene transcript_biotype:processed_pseudogene]	chr14	ncrna
TC1400000943.mm.1	9.01728	8.40352	1.53024	0.0325682		Gm10233	predicted pseudogene 10233 [Source:MGI Symbol;Acc:MGI:3704447]	ENSMUST00000089275	ENSEMBL	predicted pseudogene 10233 [gene_biotype:processed_pseudogene transcript_biotype:processed_pseudogene]	chr14	ncrna
TC1400000944.mm.1	5.54027	3.93006	3.05296	0.0083854	110902	Chrna2	cholinergic receptor, nicotinic, alpha polypeptide 2 (neuronal); cholinergic receptor, nicotinic, alpha polypeptide 2 (neuronal)	NM_144803; ENSMUST00000022620; BC011490; NM_144803.2; OTTMUST00000103500; uc007ujx.1	RefSeq; ENSEMBL; GenBank; MGI/Jackson Lab; Havana transcript; UCSC Genes	Mus musculus cholinergic receptor, nicotinic, alpha polypeptide 2 (neuronal) (Chrna2), mRNA.; cholinergic receptor, nicotinic, alpha polypeptide 2 (neuronal) [gene_biotype:protein_coding transcript_biotype:protein_coding]; Mus musculus cholinergic receptor, nicotinic, alpha polypeptide 2 (neuronal), mRNA (cDNA clone MGC:18795 IMAGE:4193582), complete cds.; cholinergic receptor, nicotinic, alpha p…	chr14	coding
TC1400001094.mm.1	8.55634	7.94763	1.5249	0.0189502	219189	Vwa8	von Willebrand factor A domain containing 8; von Willebrand factor A domain containing 8	NM_027906; NM_173758; ENSMUST00000040990; BC019143; NM_027906.1; NM_173758.3; uc007usp.2; uc007usq.2	RefSeq; ENSEMBL; GenBank; MGI/Jackson Lab; UCSC Genes	Mus musculus von Willebrand factor A domain containing 8 (Vwa8), transcript variant 1, mRNA.; Mus musculus von Willebrand factor A domain containing 8 (Vwa8), transcript variant 2, mRNA.; von Willebrand factor A domain containing 8 [gene_biotype:protein_coding transcript_biotype:protein_coding]; Mus musculus RIKEN cDNA 1300010F03 gene, mRNA (cDNA clone MGC:29234 IMAGE:5042800), complete cds.; von…	chr14	coding
TC1400001231.mm.1	5.20684	5.89227	-1.60818	0.0179412		n-R5s50	nuclear encoded rRNA 5S 50 [Source:MGI Symbol;Acc:MGI:4421895]	ENSMUST00000083168	ENSEMBL	nuclear encoded rRNA 5S 50 [gene_biotype:rRNA transcript_biotype:rRNA]	chr14	ncrna
TC1400001499.mm.1	5.89885	6.96743	-2.09736	0.00235741	353187	Nr1d2	nuclear receptor subfamily 1, group D, member 2; nuclear receptor subfamily 1, group D, member 2	NM_011584; ENSMUST00000090543; ENSMUST00000143308; BC096461; NM_011584.4; OTTMUST00000083162; OTTMUST00000083163; uc007shp.2; uc007shq.2	RefSeq; ENSEMBL; GenBank; MGI/Jackson Lab; Havana transcript; UCSC Genes	Mus musculus nuclear receptor subfamily 1, group D, member 2 (Nr1d2), mRNA.; nuclear receptor subfamily 1, group D, member 2 [gene_biotype:protein_coding transcript_biotype:protein_coding]; nuclear receptor subfamily 1, group D, member 2 [gene_biotype:protein_coding transcript_biotype:retained_intron]; Mus musculus nuclear receptor subfamily 1, group D, member 2, mRNA (cDNA clone MGC:106146 IMAGE…	chr14	coding
TC1400001509.mm.1	5.0344	4.14457	1.85295	0.0414881		Gm20699	predicted gene 20699 [Source:MGI Symbol;Acc:MGI:5313146]	ENSMUST00000177506; NONMMUT019773; OTTMUST00000110794	ENSEMBL; NONCODE; Havana transcript	predicted gene 20699 [gene_biotype:processed_pseudogene transcript_biotype:processed_pseudogene]; Non-coding transcript identified by NONCODE: Sense No Exonic; N-methyl-D-aspartate receptor-like [Rattus norvegicus] pseudogene[gene_biotype:processed_pseudogene transcript_biotype:processed_pseudogene]	chr14	ncrna
TC1400002859.mm.1	7.65263	6.57778	2.10651	0.000775308	56794	Hacl1	2-hydroxyacyl-CoA lyase 1; 2-hydroxyacyl-CoA lyase 1 ; 2-hydroxyacyl-CoA lyase 1 (Hacl1), mRNA.	NM_019975; ENSMUST00000022437; ENSMUST00000127204; ENSMUST00000128629; ENSMUST00000134626; ENSMUST00000135751; ENSMUST00000139501; ENSMUST00000140078; ENSMUST00000155210; ENSMUST00000156189; ENSMUST00000156431; ENSMUST00000165955; ENSMUST00000167066; ENSMUST00000171414; BC021360; NM_019975.3; OTTMUST00000060359; OTTMUST00000060360; OTTMUST00000060361; OTTMUST00000060362; OTTMUST00000060374; OTTMU…	RefSeq; ENSEMBL; GenBank; MGI/Jackson Lab; Havana transcript; UCSC Genes; NONCODE	Mus musculus 2-hydroxyacyl-CoA lyase 1 (Hacl1), mRNA.; 2-hydroxyacyl-CoA lyase 1 [gene_biotype:protein_coding transcript_biotype:protein_coding]; 2-hydroxyacyl-CoA lyase 1 [gene_biotype:protein_coding transcript_biotype:nonsense_mediated_decay]; 2-hydroxyacyl-CoA lyase 1 [gene_biotype:protein_coding transcript_biotype:retained_intron]; 2-hydroxyacyl-CoA lyase 1 [gene_biotype:protein_coding transc…	chr14	coding
TC1400001723.mm.1	6.25545	5.56223	1.61688	0.000595549	75698	Fam35a	family with sequence similarity 35, member A; family with sequence similarity 35, member A	NM_029389; ENSMUST00000111917; NM_029389.2; uc007tap.1; uc007taq.1; uc007tar.1; uc011ziu.1	RefSeq; ENSEMBL; MGI/Jackson Lab; UCSC Genes	Mus musculus family with sequence similarity 35, member A (Fam35a), mRNA.; family with sequence similarity 35, member A [gene_biotype:protein_coding transcript_biotype:protein_coding]; family with sequence similarity 35, member A	chr14	coding
TC1400001878.mm.1	3.3766	4.22363	-1.79879	0.0128455	11728	Ang-ps1	angiogenin, ribonuclease A family, pseudogene 1	OTTMUST00000087956; ENSMUST00000162314; NONMMUT020522	Havana transcript; ENSEMBL; NONCODE	angiogenin, ribonuclease A family, pseudogene 1[gene_biotype:unprocessed_pseudogene transcript_biotype:unprocessed_pseudogene]; angiogenin, ribonuclease A family, pseudogene 1 [gene_biotype:unprocessed_pseudogene transcript_biotype:unprocessed_pseudogene]; Non-coding transcript identified by NONCODE: Linc	chr14	ncrna
TC1400001972.mm.1	2.86707	4.08682	-2.32906	0.0111247	100041975	Gm3601	PREDICTED: predicted gene 3601 (Gm3601), miscRNA.	XR_105655.1	MGI/Jackson Lab	PREDICTED: predicted gene 3601 (Gm3601), miscRNA.	chr14	ncrna
TC1400002001.mm.1	4.26198	4.97379	-1.63786	0.0190549	11731	Ang2	angiogenin, ribonuclease A family, member 2; Synthetic construct Mus musculus clone IMAGE:100015045, MGC:180347 angiogenin, ribonuclease A family, member 2 (Ang2) mRNA, encodes complete protein.; angiogenin, ribonuclease A family, member 2	NM_007449; ENSMUST00000051274; BC146501; NM_007449.2; uc007tmu.1	RefSeq; ENSEMBL; GenBank; MGI/Jackson Lab; UCSC Genes	Mus musculus angiogenin, ribonuclease A family, member 2 (Ang2), mRNA.; angiogenin, ribonuclease A family, member 2 [gene_biotype:protein_coding transcript_biotype:protein_coding]; Synthetic construct Mus musculus clone IMAGE:100015045, MGC:180347 angiogenin, ribonuclease A family, member 2 (Ang2) mRNA, encodes complete protein.; angiogenin, ribonuclease A family, member 2	chr14	coding
TC1400002050.mm.1	7.62239	6.68595	1.9138	0.00850953	13135	Dad1	defender against cell death 1; defender against cell death 1	NM_001113358; NM_010015; ENSMUST00000022781; ENSMUST00000128231; BC024378; BC053379; BC058116; NM_001113358.1; NM_010015.4; OTTMUST00000085008; OTTMUST00000085009; uc007tvm.2; uc007tvn.2	RefSeq; ENSEMBL; GenBank; MGI/Jackson Lab; Havana transcript; UCSC Genes	Mus musculus defender against cell death 1 (Dad1), transcript variant 1, mRNA.; Mus musculus defender against cell death 1 (Dad1), transcript variant 2, mRNA.; defender against cell death 1 [gene_biotype:protein_coding transcript_biotype:protein_coding]; Mus musculus defender against cell death 1, mRNA (cDNA clone MGC:36083 IMAGE:5003022), complete cds.; Mus musculus defender against cell death 1…	chr14	coding
TC1400002098.mm.1	5.05035	6.25262	-2.30101	0.021523	21816	Tgm1	transglutaminase 1, K polypeptide; transglutaminase 1, K polypeptide	NM_001161714; NM_001161715; NM_019984; ENSMUST00000002389; ENSMUST00000168729; ENSMUST00000178034; BC026422; NM_001161714.1; NM_001161715.1; NM_019984.3; uc007uag.2; uc007uah.2; uc011zln.1	RefSeq; ENSEMBL; GenBank; MGI/Jackson Lab; UCSC Genes	Mus musculus transglutaminase 1, K polypeptide (Tgm1), transcript variant 3, mRNA.; Mus musculus transglutaminase 1, K polypeptide (Tgm1), transcript variant 1, mRNA.; Mus musculus transglutaminase 1, K polypeptide (Tgm1), transcript variant 2, mRNA.; transglutaminase 1, K polypeptide [gene_biotype:protein_coding transcript_biotype:protein_coding]; Mus musculus transglutaminase 1, K polypeptide, …	chr14	coding
TC1400002131.mm.1	9.70817	9.09357	1.53114	0.020607		Gm4479	predicted gene 4479 [Source:MGI Symbol;Acc:MGI:3782663]	ENSMUST00000178807	ENSEMBL	predicted gene 4479 [gene_biotype:processed_pseudogene transcript_biotype:processed_pseudogene]	chr14	ncrna
TC1400002266.mm.1	10.3511	9.26041	2.12978	0.000393204	13850	Ephx2	epoxide hydrolase 2, cytoplasmic; epoxide hydrolase 2, cytoplasmic ; epoxide hydrolase 2, cytoplasmic (Ephx2), mRNA.	NM_001271402; NM_001271403; NM_001271421; NM_007940; ENSMUST00000070515; BC015087; NM_007940.3; uc007ujv.1; uc007ujw.1	RefSeq; ENSEMBL; GenBank; MGI/Jackson Lab; UCSC Genes	Mus musculus epoxide hydrolase 2, cytoplasmic (Ephx2), transcript variant 2, mRNA.; Mus musculus epoxide hydrolase 2, cytoplasmic (Ephx2), transcript variant 3, mRNA.; Mus musculus epoxide hydrolase 2, cytoplasmic (Ephx2), transcript variant 4, mRNA.; Mus musculus epoxide hydrolase 2, cytoplasmic (Ephx2), transcript variant 1, mRNA.; epoxide hydrolase 2, cytoplasmic [gene_biotype:protein_coding t…	chr14	coding
TC1500000001.mm.1	2.5399	3.21148	-1.59281	0.002169				NONMMUT022577; NONMMUT022578; NovelTID_00002351; NovelTID_00002352	NONCODE; Luo lincRNA	Non-coding transcript identified by NONCODE: Linc; Non-coding transcript identified by Luo, et al.	chr15	ncrna
TC1500000072.mm.1	7.84322	7.17199	1.59242	0.000962368	105887	Ugt3a1	UDP glycosyltransferases 3 family, polypeptide A1; UDP glycosyltransferases 3 family, polypeptide A1	NM_207216; ENSMUST00000022861; ENSMUST00000145326; ENSMUST00000175695; ENSMUST00000176173; ENSMUST00000176878; BC025940; NM_207216.2; OTTMUST00000065325; OTTMUST00000065326; OTTMUST00000104358; OTTMUST00000104359; OTTMUST00000104373; NONMMUT022723; NONMMUT022724; uc007vfk.2	RefSeq; ENSEMBL; GenBank; MGI/Jackson Lab; Havana transcript; NONCODE; UCSC Genes	Mus musculus UDP glycosyltransferases 3 family, polypeptide A1 (Ugt3a1), mRNA.; UDP glycosyltransferases 3 family, polypeptide A1 [gene_biotype:protein_coding transcript_biotype:protein_coding]; UDP glycosyltransferases 3 family, polypeptide A1 [gene_biotype:protein_coding transcript_biotype:processed_transcript]; Mus musculus UDP glycosyltransferases 3 family, polypeptide A1, mRNA (cDNA clone MG…	chr15	coding
TC1500000102.mm.1	7.42675	6.18618	2.36293	0.00328371	100040052	Gm2573	PREDICTED: predicted gene 2573 (Gm2573), mRNA.	XM_001474178.2	MGI/Jackson Lab	PREDICTED: predicted gene 2573 (Gm2573), mRNA.	chr15	coding
TC1500000207.mm.1	8.46867	7.50874	1.94521	0.00296172	69574	Cmbl	carboxymethylenebutenolidase-like (Pseudomonas); carboxymethylenebutenolidase-like (Pseudomonas)	NM_181588; ENSMUST00000070918; ENSMUST00000161088; ENSMUST00000162532; BC024580; NM_181588.3; OTTMUST00000054339; OTTMUST00000054340; OTTMUST00000054341; uc007vki.1	RefSeq; ENSEMBL; GenBank; MGI/Jackson Lab; Havana transcript; UCSC Genes	Mus musculus carboxymethylenebutenolidase-like (Pseudomonas) (Cmbl), mRNA.; carboxymethylenebutenolidase-like (Pseudomonas) [gene_biotype:protein_coding transcript_biotype:protein_coding]; Mus musculus carboxymethylenebutenolidase-like (Pseudomonas), mRNA (cDNA clone MGC:37697 IMAGE:5064316), complete cds.; carboxymethylenebutenolidase-like (Pseudomonas) ; carboxymethylenebutenolidase-like (Pseud…	chr15	coding
TC1500000264.mm.1	4.32226	5.09213	-1.70512	0.0128103		Gm23754	predicted gene, 23754 [Source:MGI Symbol;Acc:MGI:5453531]	ENSMUST00000157576	ENSEMBL	predicted gene, 23754 [gene_biotype:snRNA transcript_biotype:snRNA]	chr15	ncrna
TC1500000388.mm.1	7.10643	6.44294	1.58391	0.0010883	105853	Mal2	mal, T cell differentiation protein 2; mal, T cell differentiation protein 2	NM_178920; ENSMUST00000025356; BC113154; NM_178920.4; NONMMUT023488; uc007vrm.2	RefSeq; ENSEMBL; GenBank; MGI/Jackson Lab; NONCODE; UCSC Genes	Mus musculus mal, T cell differentiation protein 2 (Mal2), mRNA.; mal, T cell differentiation protein 2 [gene_biotype:protein_coding transcript_biotype:protein_coding]; Mus musculus mal, T-cell differentiation protein 2, mRNA (cDNA clone MGC:130604 IMAGE:40058489), complete cds.; mal, T cell differentiation protein 2 ; Non-coding transcript identified by NONCODE: Exonic	chr15	coding
TC1500000410.mm.1	5.26787	6.47294	-2.30548	0.0283249		Gm22488	predicted gene, 22488 [Source:MGI Symbol;Acc:MGI:5452265]	ENSMUST00000116811	ENSEMBL	predicted gene, 22488 [gene_biotype:snoRNA transcript_biotype:snoRNA]	chr15	ncrna
TC1500000423.mm.1	10.2399	9.52785	1.63818	0.0326675	66218	Ndufb9	NADH dehydrogenase (ubiquinone) 1 beta subcomplex, 9; NADH dehydrogenase (ubiquinone) 1 beta subcomplex, 9	NM_023172; ENSMUST00000022980; BC031539; NM_023172.3; uc007vtw.1	RefSeq; ENSEMBL; GenBank; MGI/Jackson Lab; UCSC Genes	Mus musculus NADH dehydrogenase (ubiquinone) 1 beta subcomplex, 9 (Ndufb9), mRNA.; NADH dehydrogenase (ubiquinone) 1 beta subcomplex, 9 [gene_biotype:protein_coding transcript_biotype:protein_coding]; Mus musculus NADH dehydrogenase (ubiquinone) 1 beta subcomplex, 9, mRNA (cDNA clone MGC:18943 IMAGE:3979845), complete cds.; NADH dehydrogenase (ubiquinone) 1 beta subcomplex, 9	chr15	coding
TC1500000432.mm.1	4.05968	5.63838	-2.98702	0.00195107	20775	Sqle	squalene epoxidase; squalene epoxidase	NM_009270; ENSMUST00000022977; ENSMUST00000100640; ENSMUST00000161953; ENSMUST00000162142; BC042781; BC056361; NM_009270.3; OTTMUST00000088687; OTTMUST00000088688; OTTMUST00000088689; OTTMUST00000088690; NONMMUT023641; uc007vxq.1; uc007vxr.1	RefSeq; ENSEMBL; GenBank; MGI/Jackson Lab; Havana transcript; NONCODE; UCSC Genes	Mus musculus squalene epoxidase (Sqle), mRNA.; squalene epoxidase [gene_biotype:protein_coding transcript_biotype:protein_coding]; squalene epoxidase [gene_biotype:protein_coding transcript_biotype:retained_intron]; Mus musculus squalene epoxidase, mRNA (cDNA clone MGC:51384 IMAGE:4915911), complete cds.; Mus musculus squalene epoxidase, mRNA (cDNA clone MGC:73408 IMAGE:6816800), complete cds.; s…	chr15	coding
TC1500000629.mm.1	2.67758	3.40137	-1.65152	0.00770498				NONMMUT024104; NONMMUT024105; NONMMUT024106; NovelTID_00002415; NovelTID_00002416; NovelTID_00002417	NONCODE; Luo lincRNA	Non-coding transcript identified by NONCODE: Linc; Non-coding transcript identified by Luo, et al.	chr15	ncrna
TC1500000731.mm.1	4.76154	5.70377	-1.9215	0.00219739	21685	Tef	thyrotroph embryonic factor; thyrotroph embryonic factor	NM_017376; NM_153484; ENSMUST00000023024; ENSMUST00000109553; ENSMUST00000164673; ENSMUST00000166302; ENSMUST00000167138; ENSMUST00000168200; ENSMUST00000168632; ENSMUST00000169952; ENSMUST00000170027; ENSMUST00000172208; BC017689; BC036982; NM_017376.3; NM_153484.3; OTTMUST00000089876; OTTMUST00000089877; OTTMUST00000089878; OTTMUST00000089879; OTTMUST00000089880; OTTMUST00000089881; OTTMUST0000…	RefSeq; ENSEMBL; GenBank; MGI/Jackson Lab; Havana transcript; NONCODE; UCSC Genes	Mus musculus thyrotroph embryonic factor (Tef), transcript variant 1, mRNA.; Mus musculus thyrotroph embryonic factor (Tef), transcript variant 2, mRNA.; thyrotroph embryonic factor [gene_biotype:protein_coding transcript_biotype:protein_coding]; thyrotroph embryonic factor [gene_biotype:protein_coding transcript_biotype:retained_intron]; thyrotroph embryonic factor [gene_biotype:protein_coding t…	chr15	coding
TC1500000751.mm.1	7.51057	8.42791	-1.88863	0.0147356		n-R5s41	nuclear encoded rRNA 5S 41 [Source:MGI Symbol;Acc:MGI:4421886]	ENSMUST00000083025	ENSEMBL	nuclear encoded rRNA 5S 41 [gene_biotype:rRNA transcript_biotype:rRNA]	chr15	ncrna
TC1500000757.mm.1	11.2548	10.4225	1.78051	0.00343643	13105	Cyp2d9	cytochrome P450, family 2, subfamily d, polypeptide 9; cytochrome P450, family 2, subfamily d, polypeptide 9	NM_010006; ENSMUST00000089129; BC010593; BC094015; NM_010006.2; ENSMUST00000183779; uc007wzg.2; uc011zwv.1	RefSeq; ENSEMBL; GenBank; MGI/Jackson Lab; UCSC Genes	Mus musculus cytochrome P450, family 2, subfamily d, polypeptide 9 (Cyp2d9), mRNA.; cytochrome P450, family 2, subfamily d, polypeptide 9 [gene_biotype:protein_coding transcript_biotype:protein_coding]; Mus musculus cytochrome P450, family 2, subfamily d, polypeptide 9, mRNA (cDNA clone MGC:11540 IMAGE:3964178), complete cds.; Mus musculus cytochrome P450, family 2, subfamily d, polypeptide 9, mR…	chr15	coding
TC1500000774.mm.1	3.03955	3.6624	-1.53992	0.00762505				NONMMUT024422; NONMMUT024423; NovelTID_00002431	NONCODE; Luo lincRNA	Non-coding transcript identified by NONCODE: Linc; Non-coding transcript identified by Luo, et al.	chr15	ncrna
TC1500000852.mm.1	7.96897	7.08874	1.84066	0.0376209	76737	Creld2	cysteine-rich with EGF-like domains 2; cysteine-rich with EGF-like domains 2	NM_029720; ENSMUST00000024042; BC047370; NM_029720.2; uc007xep.1	RefSeq; ENSEMBL; GenBank; MGI/Jackson Lab; UCSC Genes	Mus musculus cysteine-rich with EGF-like domains 2 (Creld2), mRNA.; cysteine-rich with EGF-like domains 2 [gene_biotype:protein_coding transcript_biotype:protein_coding]; Mus musculus cysteine-rich with EGF-like domains 2, mRNA (cDNA clone MGC:51403 IMAGE:4209333), complete cds.; cysteine-rich with EGF-like domains 2	chr15	coding
TC1500000857.mm.1	6.91866	7.56297	-1.56299	0.0173851		Gm23737	predicted gene, 23737 [Source:MGI Symbol;Acc:MGI:5453514]	ENSMUST00000082547	ENSEMBL	predicted gene, 23737 [gene_biotype:snRNA transcript_biotype:snRNA]	chr15	ncrna
TC1500001137.mm.1	4.5559	5.29704	-1.67149	0.00633118				NONMMUT022585	NONCODE	Non-coding transcript identified by NONCODE: Sense No Exonic	chr15	ncrna
TC1500001138.mm.1	4.45125	5.48078	-2.04135	0.000584304				NONMMUT022586; NONMMUT022587	NONCODE	Non-coding transcript identified by NONCODE: Sense No Exonic	chr15	ncrna
TC1500001209.mm.1	3.53591	2.92673	1.52539	0.0168516				NONMMUT022750	NONCODE	Non-coding transcript identified by NONCODE: Sense No Exonic	chr15	ncrna
TC1500001324.mm.1	3.90931	3.20566	1.62863	0.039166				NONMMUT023010	NONCODE	Non-coding transcript identified by NONCODE: Sense No Exonic	chr15	ncrna
TC1500001347.mm.1	8.22599	7.58732	1.55689	0.00155555	15473	Hrsp12	heat-responsive protein 12; heat-responsive protein 12	NM_008287; ENSMUST00000022946; ENSMUST00000125286; ENSMUST00000129426; ENSMUST00000141154; BC092375; BC125590; BC125592; NM_008287.3; OTTMUST00000069354; OTTMUST00000069355; OTTMUST00000069356; OTTMUST00000069357; NONMMUT023080; uc007vlt.2	RefSeq; ENSEMBL; GenBank; MGI/Jackson Lab; Havana transcript; NONCODE; UCSC Genes	Mus musculus heat-responsive protein 12 (Hrsp12), mRNA.; heat-responsive protein 12 [gene_biotype:protein_coding transcript_biotype:protein_coding]; heat-responsive protein 12 [gene_biotype:protein_coding transcript_biotype:retained_intron]; heat-responsive protein 12 [gene_biotype:protein_coding transcript_biotype:processed_transcript]; Mus musculus heat-responsive protein 12, mRNA (cDNA clone M…	chr15	coding
TC1500001430.mm.1	8.22205	7.60588	1.53281	0.00564242	64705	Dpys	dihydropyrimidinase; dihydropyrimidinase	NM_001164466; NM_022722; ENSMUST00000022915; ENSMUST00000110306; ENSMUST00000150196; ENSMUST00000155859; BC037086; NM_001164466.1; NM_022722.3; OTTMUST00000083312; OTTMUST00000083313; OTTMUST00000083314; OTTMUST00000083316; uc007vok.2; uc007vol.2	RefSeq; ENSEMBL; GenBank; MGI/Jackson Lab; Havana transcript; UCSC Genes	Mus musculus dihydropyrimidinase (Dpys), transcript variant 2, mRNA.; Mus musculus dihydropyrimidinase (Dpys), transcript variant 1, mRNA.; dihydropyrimidinase [gene_biotype:protein_coding transcript_biotype:protein_coding]; dihydropyrimidinase [gene_biotype:protein_coding transcript_biotype:processed_transcript]; Mus musculus dihydropyrimidinase, mRNA (cDNA clone MGC:46820 IMAGE:5123860), comple…	chr15	coding
TC1500001469.mm.1	8.61588	7.77555	1.79046	0.00927256	432950	Gm5471	predicted pseudogene 5471	XM_001473255.2; ENSMUST00000072732	MGI/Jackson Lab; ENSEMBL	predicted pseudogene 5471 ; predicted pseudogene 5471 [gene_biotype:processed_pseudogene transcript_biotype:processed_pseudogene]	chr15	ncrna
TC1500001692.mm.1	4.19368	3.489	1.62978	0.0234823				NONMMUT023879	NONCODE	Non-coding transcript identified by NONCODE: Sense No Exonic	chr15	ncrna
TC1500001704.mm.1	6.54597	5.83802	1.63348	0.0106106		Gm7935	predicted pseudogene 7935 [Source:MGI Symbol;Acc:MGI:3646370]	ENSMUST00000100555	ENSEMBL	predicted pseudogene 7935 [gene_biotype:processed_pseudogene transcript_biotype:processed_pseudogene]	chr15	ncrna
TC1500001769.mm.1	3.99658	4.63079	-1.55209	0.00667037	100038659	Mirt2	myocardial infraction associated transcript 2	NR_045747; ENSMUST00000175179; NR_045747.1; NONMMUT024002; uc029ssh.1	RefSeq; ENSEMBL; MGI/Jackson Lab; NONCODE; UCSC Genes	Mus musculus myocardial infraction associated transcript 2 (Mirt2), long non-coding RNA.; predicted gene 10872 ; Non-coding transcript identified by NONCODE: Linc; Mus musculus predicted gene 10872 (Gm10872), long non-coding RNA.	chr15	ncrna
TC1500001802.mm.1	4.2953	3.5608	1.66383	0.000959934				NONMMUT024077	NONCODE	Non-coding transcript identified by NONCODE: Sense No Exonic	chr15	ncrna
TC1500001813.mm.1	3.10066	4.06134	-1.94623	0.000449327	76409	1700025B11Rik	RIKEN cDNA 1700025B11 gene; RIKEN cDNA 1700025B11 gene (1700025B11Rik), non-coding RNA.	NR_040310; NR_040310.1; KnowTID_00002988; NONMMUT024100; NONMMUT024101; uc007wnt.2	RefSeq; MGI/Jackson Lab; Luo lincRNA; NONCODE; UCSC Genes	Mus musculus RIKEN cDNA 1700025B11 gene (1700025B11Rik), long non-coding RNA.; RIKEN cDNA 1700025B11 gene (1700025B11Rik), non-coding RNA.; Non-coding transcript identified by Luo, et al.; Non-coding transcript identified by NONCODE: Linc	chr15	ncrna
TC1500001815.mm.1	3.67899	4.27149	-1.50786	0.00152623	328561	Apol10b	apolipoprotein L 10B; apolipoprotein L 10B	NM_177820; BC147348; BC147349; NM_177820.4; OTTMUST00000089822; ENSMUST00000089465; uc007wnu.2	RefSeq; GenBank; MGI/Jackson Lab; Havana transcript; ENSEMBL; UCSC Genes	Mus musculus apolipoprotein L 10B (Apol10b), mRNA.; Mus musculus apolipoprotein L 10b, mRNA (cDNA clone MGC:182494 IMAGE:9056388), complete cds.; Mus musculus apolipoprotein L 10b, mRNA (cDNA clone MGC:182514 IMAGE:9056408), complete cds.; apolipoprotein L 10B ; apolipoprotein L 10b[gene_biotype:protein_coding transcript_biotype:protein_coding]; apolipoprotein L 10B [gene_biotype:protein_coding t…	chr15	coding
TC1500001819.mm.1	6.90728	7.4989	-1.50693	0.000996246	17886	Myh9	myosin, heavy polypeptide 9, non-muscle; myosin, heavy polypeptide 9, non-muscle ; myosin, heavy polypeptide 9, non-muscle (Myh9), transcript variant 1, mRNA.	NM_022410; ENSMUST00000016771; ENSMUST00000123101; ENSMUST00000124844; ENSMUST00000126796; ENSMUST00000129453; ENSMUST00000134878; ENSMUST00000139729; NM_022410.2; OTTMUST00000039563; OTTMUST00000039564; OTTMUST00000039565; OTTMUST00000039566; OTTMUST00000039567; OTTMUST00000039568; OTTMUST00000039569; uc007woc.1; uc007wod.1; uc007woe.1; ENSMUST00000122548; NONMMUT024108; NONMMUT024111; uc011zvk.1	RefSeq; ENSEMBL; MGI/Jackson Lab; Havana transcript; UCSC Genes; NONCODE	Mus musculus myosin, heavy polypeptide 9, non-muscle (Myh9), mRNA.; myosin, heavy polypeptide 9, non-muscle [gene_biotype:protein_coding transcript_biotype:protein_coding]; myosin, heavy polypeptide 9, non-muscle [gene_biotype:protein_coding transcript_biotype:nonsense_mediated_decay]; myosin, heavy polypeptide 9, non-muscle [gene_biotype:protein_coding transcript_biotype:processed_transcript]; m…	chr15	coding
TC1500001945.mm.1	10.3515	9.74909	1.51825	0.00178639	545123; 102465786	Cyp2d11; Mir7684	cytochrome P450, family 2, subfamily d, polypeptide 11; microRNA 7684; cytochrome P450, family 2, subfamily d, polypeptide 11	NM_001104531; NR_106153; ENSMUST00000170255; NM_001104531.1; ENSMUST00000183858; uc009vas.1	RefSeq; ENSEMBL; MGI/Jackson Lab; UCSC Genes	Mus musculus cytochrome P450, family 2, subfamily d, polypeptide 11 (Cyp2d11), mRNA.; Mus musculus microRNA 7684 (Mir7684), microRNA.; cytochrome P450, family 2, subfamily d, polypeptide 11 [gene_biotype:protein_coding transcript_biotype:protein_coding]; cytochrome P450, family 2, subfamily d, polypeptide 11 ; microRNA 7684 [gene_biotype:miRNA transcript_biotype:miRNA]	chr15	coding
TC1500001951.mm.1	11.4283	10.5019	1.90056	0.0039791		Gm27742	predicted gene, 27742 [Source:MGI Symbol;Acc:MGI:5531124]	ENSMUST00000184667	ENSEMBL	predicted gene, 27742 [gene_biotype:miRNA transcript_biotype:miRNA]	chr15	ncrna
TC1500002031.mm.1	5.48741	4.84968	1.55588	0.0161877	223774	Alg12	asparagine-linked glycosylation 12 (alpha-1,6-mannosyltransferase); asparagine-linked glycosylation 12 (alpha-1,6-mannosyltransferase)	NM_001142357; NM_145477; ENSMUST00000043087; ENSMUST00000159328; ENSMUST00000160222; ENSMUST00000162183; BC021379; NM_001142357.1; NM_145477.2; OTTMUST00000077174; OTTMUST00000077175; OTTMUST00000077176; OTTMUST00000077177; NONMMUT024567; uc007xen.2; uc007xeo.2	RefSeq; ENSEMBL; GenBank; MGI/Jackson Lab; Havana transcript; NONCODE; UCSC Genes	Mus musculus asparagine-linked glycosylation 12 (alpha-1,6-mannosyltransferase) (Alg12), transcript variant 1, mRNA.; Mus musculus asparagine-linked glycosylation 12 (alpha-1,6-mannosyltransferase) (Alg12), transcript variant 2, mRNA.; asparagine-linked glycosylation 12 (alpha-1,6-mannosyltransferase) [gene_biotype:protein_coding transcript_biotype:protein_coding]; asparagine-linked glycosylation…	chr15	coding
TC1500002052.mm.1	6.98364	5.92945	2.07655	0.0062045	100126824; 72962	Sco2; Tymp	SCO cytochrome oxidase deficient homolog 2 (yeast); thymidine phosphorylase; SCO cytochrome oxidase deficient homolog 2 (yeast) ; thymidine phosphorylase	NM_001111288; NM_138302; ENSMUST00000023285; ENSMUST00000167643; BC019554; NM_001111288.1; NM_138302.1; uc007xgl.2	RefSeq; ENSEMBL; GenBank; MGI/Jackson Lab; UCSC Genes	Mus musculus SCO cytochrome oxidase deficient homolog 2 (yeast) (Sco2), mRNA.; Mus musculus thymidine phosphorylase (Tymp), mRNA.; thymidine phosphorylase [gene_biotype:protein_coding transcript_biotype:protein_coding]; SCO cytochrome oxidase deficient homolog 2 (yeast) [gene_biotype:protein_coding transcript_biotype:protein_coding]; Mus musculus SCO cytochrome oxidase deficient homolog 2 (yeast)…	chr15	coding
TC1500002350.mm.1	4.7553	4.16632	1.50418	0.0301416	12895	Cpt1b	carnitine palmitoyltransferase 1b, muscle; carnitine palmitoyltransferase 1b, muscle	NM_009948; ENSMUST00000109313; ENSMUST00000165419; ENSMUST00000168376; ENSMUST00000168879; BC018270; NM_009948.2; OTTMUST00000090606; OTTMUST00000090607; OTTMUST00000090608; OTTMUST00000090609; NONMMUT024611; uc007xgr.1	RefSeq; ENSEMBL; GenBank; MGI/Jackson Lab; Havana transcript; NONCODE; UCSC Genes	Mus musculus carnitine palmitoyltransferase 1b, muscle (Cpt1b), mRNA.; carnitine palmitoyltransferase 1b, muscle [gene_biotype:protein_coding transcript_biotype:protein_coding]; carnitine palmitoyltransferase 1b, muscle [gene_biotype:protein_coding transcript_biotype:retained_intron]; carnitine palmitoyltransferase 1b, muscle [gene_biotype:protein_coding transcript_biotype:nonsense_mediated_decay…	chr15	coding
TC1500002075.mm.1	4.83762	3.98417	1.80682	0.0319243	26874	Abcd2	ATP-binding cassette, sub-family D (ALD), member 2; ATP-binding cassette, sub-family D (ALD), member 2	NM_011994; ENSMUST00000069511; BC019187; NM_011994.2; NONMMUT024657; uc007xhx.1	RefSeq; ENSEMBL; GenBank; MGI/Jackson Lab; NONCODE; UCSC Genes	Mus musculus ATP-binding cassette, sub-family D (ALD), member 2 (Abcd2), mRNA.; ATP-binding cassette, sub-family D (ALD), member 2 [gene_biotype:protein_coding transcript_biotype:protein_coding]; Mus musculus ATP-binding cassette, sub-family D (ALD), member 2, mRNA (cDNA clone MGC:29110 IMAGE:5027149), complete cds.; ATP-binding cassette, sub-family D (ALD), member 2 ; Non-coding transcript ident…	chr15	coding
TC1500002285.mm.1	8.52758	7.73143	1.73646	0.0117777	246277	Csad	cysteine sulfinic acid decarboxylase; cysteine sulfinic acid decarboxylase	NM_144942; ENSMUST00000023805; NM_144942.4; uc007xuu.1; uc007xuv.1	RefSeq; ENSEMBL; MGI/Jackson Lab; UCSC Genes	Mus musculus cysteine sulfinic acid decarboxylase (Csad), mRNA.; cysteine sulfinic acid decarboxylase [gene_biotype:protein_coding transcript_biotype:protein_coding]; cysteine sulfinic acid decarboxylase	chr15	coding
TC1600000247.mm.1	3.00043	2.04951	1.9331	0.0288858				NONMMUT025776; NovelTID_00002643	NONCODE; Luo lincRNA	Non-coding transcript identified by NONCODE: Linc; Non-coding transcript identified by Luo, et al.	chr16	ncrna
TC1600000459.mm.1	8.55083	9.26992	-1.64615	0.0383267		n-R5s33	nuclear encoded rRNA 5S 33 [Source:MGI Symbol;Acc:MGI:4421878]	ENSMUST00000093713	ENSEMBL	nuclear encoded rRNA 5S 33 [gene_biotype:rRNA transcript_biotype:rRNA]	chr16	ncrna
TC1600000509.mm.1	9.14122	8.50118	1.55837	0.0386211	100503125	Gm10913	predicted pseudogene 10913	ENSMUST00000090238; XM_003085106.1; ENSMUST00000133732; NONMMUT026453; NONMMUT026454; OTTMUST00000070811	ENSEMBL; MGI/Jackson Lab; NONCODE; Havana transcript	predicted pseudogene 10913 ; predicted pseudogene 10913 [gene_biotype:processed_pseudogene transcript_biotype:processed_pseudogene]; Non-coding transcript identified by NONCODE: Linc; ribosomal protein L29 (Rpl29) pseudogene[gene_biotype:processed_pseudogene transcript_biotype:processed_pseudogene]	chr16	ncrna
TC1600000538.mm.1	7.21386	6.58964	1.54138	0.000219515	320184	Lrrc58	leucine rich repeat containing 58; leucine rich repeat containing 58	NM_177093; ENSMUST00000078717; BC141007; NM_177093.3; OTTMUST00000063344; ENSMUST00000119947; NONMMUT026526; NONMMUT026527; NONMMUT026528; OTTMUST00000063345; uc007zek.1	RefSeq; ENSEMBL; GenBank; MGI/Jackson Lab; Havana transcript; NONCODE; UCSC Genes	Mus musculus leucine rich repeat containing 58 (Lrrc58), mRNA.; leucine rich repeat containing 58 [gene_biotype:protein_coding transcript_biotype:protein_coding]; Mus musculus leucine rich repeat containing 58, mRNA (cDNA clone MGC:175968 IMAGE:9055619), complete cds.; leucine rich repeat containing 58 ; leucine rich repeat containing 58[gene_biotype:protein_coding transcript_biotype:protein_codi…	chr16	coding
TC1600000564.mm.1	6.92531	6.31733	1.52412	0.00213668	207683	Igsf11	immunoglobulin superfamily, member 11; immunoglobulin superfamily, member 11	NM_170599; ENSMUST00000023478; ENSMUST00000114706; BC057555; NM_170599.2; OTTMUST00000041205; OTTMUST00000041206; uc007zfp.1	RefSeq; ENSEMBL; GenBank; MGI/Jackson Lab; Havana transcript; UCSC Genes	Mus musculus immunoglobulin superfamily, member 11 (Igsf11), mRNA.; immunoglobulin superfamily, member 11 [gene_biotype:protein_coding transcript_biotype:protein_coding]; Mus musculus immunoglobulin superfamily, member 11, mRNA (cDNA clone MGC:66646 IMAGE:6416190), complete cds.; immunoglobulin superfamily, member 11 ; immunoglobulin superfamily, member 11[gene_biotype:protein_coding transcript_b…	chr16	coding
TC1600000565.mm.1	5.54827	4.71101	1.78666	0.0429369		Gm22500	predicted gene, 22500 [Source:MGI Symbol;Acc:MGI:5452277]	ENSMUST00000158982	ENSEMBL	predicted gene, 22500 [gene_biotype:snRNA transcript_biotype:snRNA]	chr16	ncrna
TC1600000603.mm.1	9.63618	10.5352	-1.86476	0.0455843		Gm26381	predicted gene, 26381 [Source:MGI Symbol;Acc:MGI:5456158]	ENSMUST00000174895	ENSEMBL	predicted gene, 26381 [gene_biotype:rRNA transcript_biotype:rRNA]	chr16	ncrna
TC1600000763.mm.1	8.39466	7.45672	1.91579	0.000180559	12892	Cpox	coproporphyrinogen oxidase; coproporphyrinogen oxidase	NM_007757; ENSMUST00000060077; BC017680; NM_007757.2; uc007znz.2; uc007zoa.2	RefSeq; ENSEMBL; GenBank; MGI/Jackson Lab; UCSC Genes	Mus musculus coproporphyrinogen oxidase (Cpox), mRNA.; coproporphyrinogen oxidase [gene_biotype:protein_coding transcript_biotype:protein_coding]; Mus musculus coproporphyrinogen oxidase, mRNA (cDNA clone MGC:18469 IMAGE:4241687), complete cds.; coproporphyrinogen oxidase	chr16	coding
TC1600000988.mm.1	6.99335	6.1155	1.83763	0.00151645	77037	Mrap	melanocortin 2 receptor accessory protein; melanocortin 2 receptor accessory protein	NM_029844; ENSMUST00000038197; ENSMUST00000125429; ENSMUST00000133973; ENSMUST00000138984; BC027543; NM_029844.3; OTTMUST00000047509; OTTMUST00000047510; OTTMUST00000047511; OTTMUST00000047512; NONMMUT027640; NONMMUT027641; NONMMUT027642; uc007zwl.1	RefSeq; ENSEMBL; GenBank; MGI/Jackson Lab; Havana transcript; NONCODE; UCSC Genes	Mus musculus melanocortin 2 receptor accessory protein (Mrap), mRNA.; melanocortin 2 receptor accessory protein [gene_biotype:protein_coding transcript_biotype:protein_coding]; melanocortin 2 receptor accessory protein [gene_biotype:protein_coding transcript_biotype:processed_transcript]; Mus musculus melanocortin 2 receptor accessory protein, mRNA (cDNA clone MGC:41286 IMAGE:1477097), complete c…	chr16	coding
TC1600001042.mm.1	7.22496	6.542	1.60544	0.00024507	12408	Cbr1	carbonyl reductase 1; carbonyl reductase 1	NM_007620; ENSMUST00000039659; BC012714; BC158026; BC158029; NM_007620.2; OTTMUST00000047490; uc007zzr.1	RefSeq; ENSEMBL; GenBank; MGI/Jackson Lab; Havana transcript; UCSC Genes	Mus musculus carbonyl reductase 1 (Cbr1), mRNA.; carbonyl reductase 1 [gene_biotype:protein_coding transcript_biotype:protein_coding]; Mus musculus carbonyl reductase 1, mRNA (cDNA clone MGC:14021 IMAGE:4217206), complete cds.; Mus musculus carbonyl reductase 1, mRNA (cDNA clone MGC:189967 IMAGE:9088154), complete cds.; Mus musculus carbonyl reductase 1, mRNA (cDNA clone MGC:189968 IMAGE:9088155)…	chr16	coding
TC1600001349.mm.1	7.01821	6.32391	1.6181	0.0213585	208624	Alg3	asparagine-linked glycosylation 3 (alpha-1,3-mannosyltransferase); asparagine-linked glycosylation 3 (alpha-1,3-mannosyltransferase)	NM_145939; ENSMUST00000045918; ENSMUST00000123774; ENSMUST00000127454; ENSMUST00000147867; BC031893; NM_145939.2; OTTMUST00000063986; OTTMUST00000063999; OTTMUST00000064000; OTTMUST00000064740; NONMMUT025859; uc007yqe.2; uc007yqf.2	RefSeq; ENSEMBL; GenBank; MGI/Jackson Lab; Havana transcript; NONCODE; UCSC Genes	Mus musculus asparagine-linked glycosylation 3 (alpha-1,3-mannosyltransferase) (Alg3), mRNA.; asparagine-linked glycosylation 3 (alpha-1,3-mannosyltransferase) [gene_biotype:protein_coding transcript_biotype:protein_coding]; asparagine-linked glycosylation 3 (alpha-1,3-mannosyltransferase) [gene_biotype:protein_coding transcript_biotype:nonsense_mediated_decay]; asparagine-linked glycosylation 3 …	chr16	coding
TC1600001368.mm.1	10.5688	7.29842	9.64907	0.000126974	74147	Ehhadh	enoyl-Coenzyme A, hydratase/3-hydroxyacyl Coenzyme A dehydrogenase; enoyl-Coenzyme A, hydratase/3-hydroxyacyl Coenzyme A dehydrogenase	NM_023737; ENSMUST00000023559; BC016899; NM_023737.3; OTTMUST00000085347; uc007yrm.2	RefSeq; ENSEMBL; GenBank; MGI/Jackson Lab; Havana transcript; UCSC Genes	Mus musculus enoyl-Coenzyme A, hydratase/3-hydroxyacyl Coenzyme A dehydrogenase (Ehhadh), mRNA.; enoyl-Coenzyme A, hydratase/3-hydroxyacyl Coenzyme A dehydrogenase [gene_biotype:protein_coding transcript_biotype:protein_coding]; Mus musculus enoyl-Coenzyme A, hydratase/3-hydroxyacyl Coenzyme A dehydrogenase, mRNA (cDNA clone MGC:19225 IMAGE:4241677), complete cds.; enoyl-Coenzyme A, hydratase/3-h…	chr16	coding
TC1600001419.mm.1	7.01762	6.22589	1.73115	0.00595712	12737	Cldn1	claudin 1; claudin 1	NM_016674; ENSMUST00000023154; BC002003; NM_016674.4; OTTMUST00000054195; uc007yuz.2	RefSeq; ENSEMBL; GenBank; MGI/Jackson Lab; Havana transcript; UCSC Genes	Mus musculus claudin 1 (Cldn1), mRNA.; claudin 1 [gene_biotype:protein_coding transcript_biotype:protein_coding]; Mus musculus claudin 1, mRNA (cDNA clone MGC:5767 IMAGE:3491319), complete cds.; claudin 1 ; claudin 1[gene_biotype:protein_coding transcript_biotype:protein_coding]	chr16	coding
TC1600001507.mm.1	3.87914	3.24804	1.54874	0.0045899	100502673	Gm19316	PREDICTED: predicted gene, 19316 (Gm19316), miscRNA.	XR_105774.2	MGI/Jackson Lab	PREDICTED: predicted gene, 19316 (Gm19316), miscRNA.	chr16	ncrna
TC1600001548.mm.1	7.03334	7.63705	-1.51962	0.0279201	72599	Pdia5	protein disulfide isomerase associated 5; protein disulfide isomerase associated 5	NM_028295; ENSMUST00000023550; BC009151; NM_028295.1; uc007zbl.1	RefSeq; ENSEMBL; GenBank; MGI/Jackson Lab; UCSC Genes	Mus musculus protein disulfide isomerase associated 5 (Pdia5), mRNA.; protein disulfide isomerase associated 5 [gene_biotype:protein_coding transcript_biotype:protein_coding]; Mus musculus protein disulfide isomerase associated 5, mRNA (cDNA clone MGC:11961 IMAGE:3600849), complete cds.; protein disulfide isomerase associated 5	chr16	coding
TC1600001602.mm.1	7.31584	6.66365	1.57155	0.00343849	18171	Nr1i2	nuclear receptor subfamily 1, group I, member 2; nuclear receptor subfamily 1, group I, member 2	NM_001098404; NM_010936; ENSMUST00000023504; BC120796; BC137780; NM_001098404.1; NM_010936.3; OTTMUST00000057839; uc007zep.1; uc007zeq.1	RefSeq; ENSEMBL; GenBank; MGI/Jackson Lab; Havana transcript; UCSC Genes	Mus musculus nuclear receptor subfamily 1, group I, member 2 (Nr1i2), transcript variant 2, mRNA.; Mus musculus nuclear receptor subfamily 1, group I, member 2 (Nr1i2), transcript variant 1, mRNA.; nuclear receptor subfamily 1, group I, member 2 [gene_biotype:protein_coding transcript_biotype:protein_coding]; Mus musculus nuclear receptor subfamily 1, group I, member 2, mRNA (cDNA clone MGC:15603…	chr16	coding
TC1600001630.mm.1	4.7207	3.28561	2.70399	0.00268152	100503040	Gm19522	predicted gene, 19522; predicted gene, 19522 (Gm19522), non-coding RNA.	NR_040402; NR_040402.1; NONMMUT026664; NONMMUT026665; uc007zfz.2	RefSeq; MGI/Jackson Lab; NONCODE; UCSC Genes	Mus musculus predicted gene, 19522 (Gm19522), long non-coding RNA.; predicted gene, 19522 (Gm19522), non-coding RNA.; Non-coding transcript identified by NONCODE: Linc	chr16	ncrna
TC1600001672.mm.1	5.59606	4.83477	1.69501	0.00751404				NONMMUT026815	NONCODE	Non-coding transcript identified by NONCODE: Sense No Exonic	chr16	ncrna
TC1600001805.mm.1	5.07677	4.45885	1.53465	0.000716528	224273	Crybg3	beta-gamma crystallin domain containing 3; beta-gamma crystallin domain containing 3	NM_174848; ENSMUST00000179383; BC043118; NM_174848.3; OTTMUST00000067098; OTTMUST00000067099; OTTMUST00000067100; OTTMUST00000067101; ENSMUST00000044604; ENSMUST00000129350; ENSMUST00000129762; ENSMUST00000139989; uc007zpj.2; uc007zpk.2	RefSeq; ENSEMBL; GenBank; MGI/Jackson Lab; Havana transcript; UCSC Genes	Mus musculus beta-gamma crystallin domain containing 3 (Crybg3), mRNA.; beta-gamma crystallin domain containing 3 ; Mus musculus beta-gamma crystallin domain containing 3, mRNA (cDNA clone MGC:58045 IMAGE:6408859), complete cds.; beta-gamma crystallin domain containing 3[gene_biotype:protein_coding transcript_biotype:protein_coding]; beta-gamma crystallin domain containing 3[gene_biotype:protein_…	chr16	coding
[truncated: 124 more rows]
