# Supplementary material for: The polysaccharide–peptide complex from mushroom Cordyceps militaris ameliorates atherosclerosis by modulating the lncRNA–miRNA–mRNA axis
Source: Royal Society of Chemistry journal article supplement (doi:10.1039/d1fo03285b), 2022-01-01
Supplement: d1fo03285b3.xlsx [file d1fo03285b3.xlsx]

## Sheet: LncRNA
probeset_id	CMPS80	Model	Fold Change	ANOVA p-value	Entrez ID	Gene Symbol	Description	mRNA Accession	mRNA Source	mRNA Description	Chromosome	Type
TC0100001139.mm.1	5.27515	4.53395	1.67157	0.0167275				NONMMUT002502	NONCODE	Non-coding transcript identified by NONCODE: Sense No Exonic	chr1	LncRNA
TC0100001499.mm.1	4.76369	5.47191	-1.63379	0.00357772		Gm16588	predicted gene 16588 [Source:MGI Symbol;Acc:MGI:4415008]	ENSMUST00000162889; NONMMUT003540; OTTMUST00000088482	ENSEMBL; NONCODE; Havana transcript	predicted gene 16588 [gene_biotype:processed_pseudogene transcript_biotype:processed_pseudogene]; Non-coding transcript identified by NONCODE: Sense No Exonic; Novel pseudogene[gene_biotype:processed_pseudogene transcript_biotype:processed_pseudogene]	chr1	LncRNA
TC0100001681.mm.1	3.16977	2.56066	1.52532	0.00266688				NONMMUT003947; NONMMUT003948; NONMMUT003949; NONMMUT003950	NONCODE	Non-coding transcript identified by NONCODE: Sense No Exonic	chr1	LncRNA
TC0100001682.mm.1	5.10186	4.40051	1.62603	0.0023651				NONMMUT003951	NONCODE	Non-coding transcript identified by NONCODE: Sense No Exonic	chr1	LncRNA
TC0100001683.mm.1	4.02986	3.00351	2.03688	3.79631e-05				NONMMUT003952	NONCODE	Non-coding transcript identified by NONCODE: Sense No Exonic	chr1	LncRNA
TC0100001878.mm.1	3.68624	2.77621	1.87909	0.0159983				NONMMUT004480	NONCODE	Non-coding transcript identified by NONCODE: Sense No Exonic	chr1	LncRNA
TC0100002398.mm.1	3.29962	4.15758	-1.81247	0.00596754				NONMMUT001083; NONMMUT001084; NovelTID_00000250; NovelTID_00000251	NONCODE; Luo lincRNA	Non-coding transcript identified by NONCODE: Linc; Non-coding transcript identified by Luo, et al.	chr1	LncRNA
TC0100002412.mm.1	5.39318	6.51763	-2.18018	0.0129911				NONMMUT001136	NONCODE	Non-coding transcript identified by NONCODE: Antisense	chr1	LncRNA
TC0100002501.mm.1	3.72263	4.33554	-1.52933	0.00850512				NONMMUT001344; NONMMUT001345; NONMMUT001346; NONMMUT001347; NONMMUT001348; NONMMUT001349; NONMMUT001350; NONMMUT001351; NovelTID_00000259; NovelTID_00000260; NovelTID_00000261; NovelTID_00000262; NovelTID_00000263; NovelTID_00000264; NovelTID_00000265	NONCODE; Luo lincRNA	Non-coding transcript identified by NONCODE: Linc; Non-coding transcript identified by Luo, et al.	chr1	LncRNA
TC0100002695.mm.1	6.38452	5.48718	1.86263	0.003104				NONMMUT001733	NONCODE	Non-coding transcript identified by NONCODE: Sense No Exonic	chr1	LncRNA
TC0100002699.mm.1	6.34783	5.3773	1.95955	0.00166971				NONMMUT001739; NONMMUT001740	NONCODE	Non-coding transcript identified by NONCODE: Sense No Exonic	chr1	LncRNA
TC0100002968.mm.1	4.16643	2.44371	3.30059	0.0287387				KnowTID_00000528; NONMMUT002393	Luo lincRNA; NONCODE	Non-coding transcript identified by Luo, et al.; Non-coding transcript identified by NONCODE: Linc	chr1	LncRNA
TC0100003045.mm.1	5.73318	5.1245	1.52486	0.00704766				NONMMUT002543; NONMMUT002544; NONMMUT002545	NONCODE	Non-coding transcript identified by NONCODE: Antisense	chr1	LncRNA
TC0100003117.mm.1	3.39338	2.79432	1.51473	0.0134409				NONMMUT002702	NONCODE	Non-coding transcript identified by NONCODE: Sense No Exonic	chr1	LncRNA
TC0100003171.mm.1	4.36924	3.53731	1.78006	0.000982197				NONMMUT002956	NONCODE	Non-coding transcript identified by NONCODE: Sense No Exonic	chr1	LncRNA
TC0100003423.mm.1	3.70884	4.51092	-1.74361	0.00920408				NONMMUT003545	NONCODE	Non-coding transcript identified by NONCODE: Sense No Exonic	chr1	LncRNA
TC0100003654.mm.1	5.09053	5.73456	-1.56269	0.00421099				NONMMUT003989	NONCODE	Non-coding transcript identified by NONCODE: Sense No Exonic	chr1	LncRNA
TC0200000796.mm.1	3.0094	3.75806	-1.68022	0.013722				NONMMUT037201	NONCODE	Non-coding transcript identified by NONCODE: Sense No Exonic	chr2	LncRNA
TC0200001265.mm.1	2.79514	3.59269	-1.73815	0.0273836				NONMMUT038328	NONCODE	Non-coding transcript identified by NONCODE: Sense No Exonic	chr2	LncRNA
TC0200001502.mm.1	8.40754	9.47126	-2.09032	0.00840345		Gm10801	predicted gene 10801 [Source:MGI Symbol;Acc:MGI:3641656]	ENSMUST00000099684; NONMMUT038757	ENSEMBL; NONCODE	predicted gene 10801 [gene_biotype:protein_coding transcript_biotype:protein_coding]; Non-coding transcript identified by NONCODE: Linc	chr2	LncRNA
TC0200001503.mm.1	8.50948	9.67389	-2.24141	0.0176671				NONMMUT038759; NONMMUT038760	NONCODE	Non-coding transcript identified by NONCODE: Linc	chr2	LncRNA
TC0200001813.mm.1	5.03759	3.9753	2.08823	0.00669201				NONMMUT039492	NONCODE	Non-coding transcript identified by NONCODE: Sense No Exonic	chr2	LncRNA
TC0200001837.mm.1	4.5981	3.95105	1.56596	0.0360105				NONMMUT039531	NONCODE	Non-coding transcript identified by NONCODE: Sense No Exonic	chr2	LncRNA
TC0200002294.mm.1	5.0882	4.45303	1.55312	0.024769				NONMMUT040539	NONCODE	Non-coding transcript identified by NONCODE: Linc	chr2	LncRNA
TC0200003055.mm.1	3.68326	3.08157	1.51749	0.0258348				NONMMUT035974; NONMMUT035975	NONCODE	Non-coding transcript identified by NONCODE: Sense No Exonic	chr2	LncRNA
TC0200003220.mm.1	3.3058	4.34711	-2.05809	0.0152793				NONMMUT036431	NONCODE	Non-coding transcript identified by NONCODE: Linc	chr2	LncRNA
TC0200003732.mm.1	4.26059	5.23393	-1.96338	0.00381444		Rapgef4os1; RP23-326E21.1	Rap guanine nucleotide exchange factor (GEF) 4, opposite strand 1 [Source:MGI Symbol;Acc:MGI:3649714]; novel transcript	ENSMUST00000126462; OTTMUST00000031741; NONMMUT037848; NONMMUT037851; NONMMUT037853	ENSEMBL; Havana transcript; NONCODE	Rap guanine nucleotide exchange factor (GEF) 4, opposite strand 1 [gene_biotype:antisense transcript_biotype:antisense]; novel transcript; Non-coding transcript identified by NONCODE: Antisense	chr2	LncRNA
TC0200003733.mm.1	4.68642	5.35102	-1.58513	0.00126228				NONMMUT037854	NONCODE	Non-coding transcript identified by NONCODE: Antisense	chr2	LncRNA
TC0200004800.mm.1	5.05619	5.71415	-1.57785	0.0330185		9030622O22Rik; RP23-207P16.1	RIKEN cDNA 9030622O22 gene [Source:MGI Symbol;Acc:MGI:1918820]; novel transcript	ENSMUST00000129082; ENSMUST00000132070; ENSMUST00000136555; OTTMUST00000037254; OTTMUST00000037255; OTTMUST00000037256; NONMMUT040350; NONMMUT040351; NONMMUT040352; NONMMUT040353; NONMMUT040354; NONMMUT040355; NONMMUT040356; NONMMUT040357; NONMMUT040358; NONMMUT040359; NONMMUT040361; NONMMUT040362; NONMMUT040363; NONMMUT040364	ENSEMBL; Havana transcript; NONCODE	RIKEN cDNA 9030622O22 gene [gene_biotype:lincRNA transcript_biotype:lincRNA]; novel transcript; Non-coding transcript identified by NONCODE: Linc	chr2	LncRNA
TC0200004944.mm.1	8.64224	7.34311	2.4608	0.00232883				NONMMUT040619	NONCODE	Non-coding transcript identified by NONCODE: Sense No Exonic	chr2	LncRNA
TC0200005289.mm.1	5.12809	5.9574	-1.77683	0.00955269				NONMMUT041545; NONMMUT041546; NONMMUT041549; NONMMUT041555; NONMMUT041556; NONMMUT041557; NovelTID_00004164; NovelTID_00004165; NovelTID_00004166; NovelTID_00004167	NONCODE; Luo lincRNA	Non-coding transcript identified by NONCODE: Linc; Non-coding transcript identified by Luo, et al.	chr2	LncRNA
TC0300000049.mm.1	8.65432	8.06161	1.50807	0.0454455		Gm15467	predicted gene 15467 [Source:MGI Symbol;Acc:MGI:3705388]	ENSMUST00000120582; NONMMUT042054; OTTMUST00000053476	ENSEMBL; NONCODE; Havana transcript	predicted gene 15467 [gene_biotype:processed_pseudogene transcript_biotype:processed_pseudogene]; Non-coding transcript identified by NONCODE: Antisense; ribosomal protein L29 (Rpl29) pseudogene[gene_biotype:processed_pseudogene transcript_biotype:processed_pseudogene]	chr3	LncRNA
TC0300000445.mm.1	4.21832	3.61143	1.52298	0.043417				NONMMUT043192	NONCODE	Non-coding transcript identified by NONCODE: Sense No Exonic	chr3	LncRNA
TC0300000514.mm.1	4.9008	4.28316	1.53436	0.00733068		Gm20656	predicted gene 20656 [Source:MGI Symbol;Acc:MGI:5313103]	ENSMUST00000176925; NONMMUT043322; OTTMUST00000103526	ENSEMBL; NONCODE; Havana transcript	predicted gene 20656 [gene_biotype:unprocessed_pseudogene transcript_biotype:unprocessed_pseudogene]; Non-coding transcript identified by NONCODE: Linc; guanine monophosphate synthetase (Gmps) pseudogene[gene_biotype:unprocessed_pseudogene transcript_biotype:unprocessed_pseudogene]	chr3	LncRNA
TC0300000661.mm.1	3.53365	2.94073	1.5083	0.0426554				NONMMUT043672	NONCODE	Non-coding transcript identified by NONCODE: Sense No Exonic	chr3	LncRNA
TC0300000757.mm.1	4.77458	6.08751	-2.48445	0.00439863	100038411	Gm15998	predicted gene 15998	XR_104847.1; ENSMUST00000135144; OTTMUST00000071485; NONMMUT043961; NONMMUT043962; NONMMUT043963; uc008pyr.1	MGI/Jackson Lab; ENSEMBL; Havana transcript; NONCODE; UCSC Genes	predicted gene 15998 ; predicted gene 15998 [gene_biotype:antisense transcript_biotype:antisense]; Novel transcript; Non-coding transcript identified by NONCODE: Antisense; Mus musculus adult male corpora quadrigemina cDNA, RIKEN full-length enriched library, clone:B230209I18 product:hypothetical protein, full insert sequence.	chr3	LncRNA
TC0300000980.mm.1	7.92585	6.97671	1.93071	0.0100522				NONMMUT044365	NONCODE	Non-coding transcript identified by NONCODE: Sense No Exonic	chr3	LncRNA
TC0300001077.mm.1	3.10214	2.34312	1.69234	0.00107735				NONMMUT044605	NONCODE	Non-coding transcript identified by NONCODE: Sense No Exonic	chr3	LncRNA
TC0300001200.mm.1	4.65516	5.25533	-1.5159	0.000155115				KnowTID_00004848; NONMMUT044922	Luo lincRNA; NONCODE	Non-coding transcript identified by Luo, et al.; Non-coding transcript identified by NONCODE: Linc	chr3	LncRNA
TC0300001217.mm.1	2.32997	2.98427	-1.57385	0.00926095				KnowTID_00004853; NONMMUT044963; NONMMUT044964	Luo lincRNA; NONCODE	Non-coding transcript identified by Luo, et al.; Non-coding transcript identified by NONCODE: Linc	chr3	LncRNA
TC0300001669.mm.1	5.7353	4.76117	1.96446	0.0195577				NONMMUT042154	NONCODE	Non-coding transcript identified by NONCODE: Linc	chr3	LncRNA
TC0300001693.mm.1	2.03336	2.80322	-1.70511	0.000268903				NONMMUT042203; NovelTID_00004383	NONCODE; Luo lincRNA	Non-coding transcript identified by NONCODE: Linc; Non-coding transcript identified by Luo, et al.	chr3	LncRNA
TC0300002520.mm.1	6.13919	4.52928	3.05233	0.00858842	100038464	Gm15441	predicted gene 15441; predicted gene 15441	NR_040409; NR_040409.1; ENSMUST00000098839; ENSMUST00000107095; OTTMUST00000051889; OTTMUST00000051890; NONMMUT044295; NONMMUT044296; NONMMUT044297; uc008qnb.1	RefSeq; MGI/Jackson Lab; ENSEMBL; Havana transcript; NONCODE; UCSC Genes	Mus musculus predicted gene 15441 (Gm15441), long non-coding RNA.; predicted gene 15441 ; predicted gene 15441 [gene_biotype:antisense transcript_biotype:antisense]; Novel transcript; Non-coding transcript identified by NONCODE: Antisense	chr3	LncRNA
TC0300002650.mm.1	4.02173	3.03098	1.98722	0.00365687				NONMMUT044600	NONCODE	Non-coding transcript identified by NONCODE: Sense No Exonic	chr3	LncRNA
TC0300002651.mm.1	2.8091	2.1102	1.62327	0.0364324				NONMMUT044601	NONCODE	Non-coding transcript identified by NONCODE: Sense No Exonic	chr3	LncRNA
TC0300002661.mm.1	4.20223	3.00354	2.29531	0.000673122				NONMMUT044615	NONCODE	Non-coding transcript identified by NONCODE: Sense No Exonic	chr3	LncRNA
TC0300002690.mm.1	6.44296	5.33342	2.15777	0.000349015				NONMMUT044676	NONCODE	Non-coding transcript identified by NONCODE: Sense No Exonic	chr3	LncRNA
TC0300002691.mm.1	6.70197	6.10783	1.50957	0.00074981				NONMMUT044677	NONCODE	Non-coding transcript identified by NONCODE: Sense No Exonic	chr3	LncRNA
TC0300002692.mm.1	5.48781	4.81871	1.59007	0.012974				NONMMUT044678	NONCODE	Non-coding transcript identified by NONCODE: Sense No Exonic	chr3	LncRNA
TC0300002817.mm.1	5.51585	4.60638	1.87836	0.0316051				NONMMUT044925	NONCODE	Non-coding transcript identified by NONCODE: Sense No Exonic	chr3	LncRNA
TC0300003127.mm.1	2.91744	2.17811	1.6694	0.0205028				NONMMUT045737	NONCODE	Non-coding transcript identified by NONCODE: Linc	chr3	LncRNA
TC0400000038.mm.1	3.05861	4.23547	-2.26083	0.0267984				NONMMUT046037; NovelTID_00004579	NONCODE; Luo lincRNA	Non-coding transcript identified by NONCODE: Linc; Non-coding transcript identified by Luo, et al.	chr4	LncRNA
TC0400000335.mm.1	6.54447	7.84718	-2.46692	0.00903151				KnowTID_00005258; NONMMUT046750	Luo lincRNA; NONCODE	Non-coding transcript identified by Luo, et al.; Non-coding transcript identified by NONCODE: Linc	chr4	LncRNA
TC0400000971.mm.1	6.01109	5.41241	1.51433	0.0370047				NONMMUT048226	NONCODE	Non-coding transcript identified by NONCODE: Sense No Exonic	chr4	LncRNA
TC0400001225.mm.1	2.55427	1.92599	1.54572	0.0397873				NONMMUT048781; NONMMUT048782; uc008ueu.1	NONCODE; UCSC Genes	Non-coding transcript identified by NONCODE: Antisense; Mus musculus in vitro fertilized eggs cDNA, RIKEN full-length enriched library, clone:7420402G03 product:unclassifiable, full insert sequence.	chr4	LncRNA
TC0400001310.mm.1	8.40952	9.07269	-1.58356	0.000551784				NONMMUT048976; NONMMUT048977; NONMMUT048978; NONMMUT048979; NONMMUT048980; NONMMUT048981; NONMMUT048982; NONMMUT048983; NONMMUT048984; NONMMUT048985; NONMMUT048986; NONMMUT048987; NONMMUT048988; NONMMUT048989; NONMMUT048990; NONMMUT048991; NONMMUT048992; NONMMUT048993; NONMMUT048994; NONMMUT048995; NONMMUT048996; NONMMUT048997; NONMMUT048998; NONMMUT048999; NONMMUT049000; NONMMUT049001; NONMMUT04…	NONCODE; Luo lincRNA	Non-coding transcript identified by NONCODE: Linc; Non-coding transcript identified by Luo, et al.	chr4	LncRNA
TC0400001857.mm.1	4.8969	3.94456	1.935	0.0191542				NONMMUT050473	NONCODE	Non-coding transcript identified by NONCODE: Sense No Exonic	chr4	LncRNA
TC0400002150.mm.1	2.89975	4.96492	-4.18484	0.0233903				NONMMUT046036; NovelTID_00004880	NONCODE; Luo lincRNA	Non-coding transcript identified by NONCODE: Linc; Non-coding transcript identified by Luo, et al.	chr4	LncRNA
TC0400002213.mm.1	4.04407	2.05778	3.96215	0.011526		Gm11832; RP23-242O9.4	predicted gene 11832 [Source:MGI Symbol;Acc:MGI:3650310]; novel transcript	ENSMUST00000148576; OTTMUST00000010246; NONMMUT046213; uc008rzu.1	ENSEMBL; Havana transcript; NONCODE; UCSC Genes	predicted gene 11832 [gene_biotype:antisense transcript_biotype:antisense]; novel transcript; Non-coding transcript identified by NONCODE: Antisense; Mus musculus adult male liver tumor cDNA, RIKEN full-length enriched library, clone:C730020I24 product:unclassifiable, full insert sequence.	chr4	LncRNA
TC0400002569.mm.1	3.97501	3.38473	1.50554	0.0113067				NONMMUT047081	NONCODE	Non-coding transcript identified by NONCODE: Sense No Exonic	chr4	LncRNA
TC0400002635.mm.1	7.71446	6.6852	2.04098	0.0012519				KnowTID_00005416; KnowTID_00005417; NONMMUT047231; NONMMUT047232	Luo lincRNA; NONCODE	Non-coding transcript identified by Luo, et al.; Non-coding transcript identified by NONCODE: Linc	chr4	LncRNA
TC0400002798.mm.1	3.27735	3.8651	-1.5029	0.0163354				NONMMUT047610; NovelTID_00004934	NONCODE; Luo lincRNA	Non-coding transcript identified by NONCODE: Linc; Non-coding transcript identified by Luo, et al.	chr4	LncRNA
TC0400003204.mm.1	4.90934	5.52915	-1.53667	0.0192866		Gm12744; RP23-97O7.11	predicted gene 12744 [Source:MGI Symbol;Acc:MGI:3702539]; putative transcript	ENSMUST00000146976; OTTMUST00000018776; NONMMUT048484	ENSEMBL; Havana transcript; NONCODE	predicted gene 12744 [gene_biotype:antisense transcript_biotype:antisense]; putative transcript; Non-coding transcript identified by NONCODE: Antisense	chr4	LncRNA
TC0400003266.mm.1	4.02445	5.2122	-2.27798	0.00059233		Ttc39aos1; RP23-110H24.2; Gm12750	Ttc39a opposite strand RNA 1 [Source:MGI Symbol;Acc:MGI:3651956]; novel transcript; predicted gene 12750	ENSMUST00000150239; ENSMUST00000154561; OTTMUST00000018855; OTTMUST00000018856; uc008uch.1; KnowTID_00005456; NONMMUT048652; NONMMUT048653; NONMMUT048654; NONMMUT048655; NONMMUT048656; NONMMUT048657; NONMMUT048658; NONMMUT048659; NONMMUT048660; NONMMUT048661; NONMMUT048662; NONMMUT048663	ENSEMBL; Havana transcript; UCSC Genes; Luo lincRNA; NONCODE	Ttc39a opposite strand RNA 1 [gene_biotype:antisense transcript_biotype:antisense]; novel transcript; predicted gene 12750 ; Non-coding transcript identified by Luo, et al.; Non-coding transcript identified by NONCODE: Linc	chr4	LncRNA
TC0400003450.mm.1	4.00992	3.41132	1.51425	0.0295399				NONMMUT049258	NONCODE	Non-coding transcript identified by NONCODE: Sense No Exonic	chr4	LncRNA
TC0400003484.mm.1	4.10709	3.3233	1.72164	0.0112001				NONMMUT049310	NONCODE	Non-coding transcript identified by NONCODE: Sense No Exonic	chr4	LncRNA
TC0500000032.mm.1	6.90702	6.02992	1.83668	0.00123984		Gm26825	predicted gene, 26825 [Source:MGI Symbol;Acc:MGI:5477319]	ENSMUST00000181751	ENSEMBL	predicted gene, 26825 [gene_biotype:lincRNA transcript_biotype:lincRNA]	chr5	LncRNA
TC0500000376.mm.1	3.07979	2.47756	1.51806	0.0177108				NONMMUT051919; NONMMUT051920	NONCODE	Non-coding transcript identified by NONCODE: Sense No Exonic	chr5	LncRNA
TC0500000820.mm.1	5.04557	2.93673	4.31344	0.0269669				NONMMUT053023	NONCODE	Non-coding transcript identified by NONCODE: Sense No Exonic	chr5	LncRNA
TC0500000822.mm.1	5.72232	4.16738	2.93821	0.0185444				NONMMUT053025	NONCODE	Non-coding transcript identified by NONCODE: Sense No Exonic	chr5	LncRNA
TC0500001002.mm.1	2.88848	1.9577	1.90631	0.0146889				NONMMUT053379	NONCODE	Non-coding transcript identified by NONCODE: Sense No Exonic	chr5	LncRNA
TC0500001657.mm.1	2.28255	1.68732	1.51071	0.0392914				NONMMUT054990	NONCODE	Non-coding transcript identified by NONCODE: Linc	chr5	LncRNA
TC0500001723.mm.1	7.58544	8.22943	-1.56265	0.0213221				NONMMUT055120	NONCODE	Non-coding transcript identified by NONCODE: Antisense	chr5	LncRNA
TC0500002417.mm.1	5.55339	4.91726	1.55416	0.014259	75954	5033403H07Rik	RIKEN cDNA 5033403H07 gene; RIKEN cDNA 5033403H07 gene (5033403H07Rik), non-coding RNA.	NR_040413; NR_040413.1; KnowTID_00005848; KnowTID_00005849; NONMMUT052310; NONMMUT052311; NONMMUT052312; uc029vhl.1	RefSeq; MGI/Jackson Lab; Luo lincRNA; NONCODE; UCSC Genes	Mus musculus RIKEN cDNA 5033403H07 gene (5033403H07Rik), long non-coding RNA.; RIKEN cDNA 5033403H07 gene (5033403H07Rik), non-coding RNA.; Non-coding transcript identified by Luo, et al.; Non-coding transcript identified by NONCODE: Linc	chr5	LncRNA
TC0500002629.mm.1	5.84969	4.51469	2.52275	0.00137141				NONMMUT052836	NONCODE	Non-coding transcript identified by NONCODE: Sense No Exonic	chr5	LncRNA
TC0500002661.mm.1	8.3402	7.48466	1.80944	0.0192827		Gm2199	predicted gene 2199 [Source:MGI Symbol;Acc:MGI:3780369]	ENSMUST00000119065; NONMMUT052900; OTTMUST00000072153	ENSEMBL; NONCODE; Havana transcript	predicted gene 2199 [gene_biotype:processed_pseudogene transcript_biotype:processed_pseudogene]; Non-coding transcript identified by NONCODE: Linc; mitochondrial carrier homolog 2 (C. elegans) (Mtch2) pseudogene[gene_biotype:processed_pseudogene transcript_biotype:processed_pseudogene]	chr5	LncRNA
TC0500002935.mm.1	4.55234	3.90197	1.56956	0.0282756				NONMMUT053601	NONCODE	Non-coding transcript identified by NONCODE: Sense No Exonic	chr5	LncRNA
TC0500003213.mm.1	5.5253	3.97953	2.91961	0.00182763				NONMMUT054361	NONCODE	Non-coding transcript identified by NONCODE: Sense No Exonic	chr5	LncRNA
TC0500003214.mm.1	6.36529	5.00673	2.56429	0.0072958				NONMMUT054362	NONCODE	Non-coding transcript identified by NONCODE: Sense No Exonic	chr5	LncRNA
TC0500003217.mm.1	3.30686	4.01551	-1.63427	0.0147861				NONMMUT054373	NONCODE	Non-coding transcript identified by NONCODE: Antisense	chr5	LncRNA
TC0500003697.mm.1	6.09176	5.43313	1.57859	0.0174412				NONMMUT055529	NONCODE	Non-coding transcript identified by NONCODE: Sense No Exonic	chr5	LncRNA
TC0600000713.mm.1	3.42668	2.67179	1.6875	0.00111694				NONMMUT057171	NONCODE	Non-coding transcript identified by NONCODE: Linc	chr6	LncRNA
TC0600000856.mm.1	4.44755	3.38937	2.0823	0.0181049	100038714	Gm15401	predicted gene 15401; predicted gene 15401	NR_040421; NR_040422; NR_040421.1; NR_040422.1; ENSMUST00000081929; ENSMUST00000101278; ENSMUST00000156497; NONMMUT057444; OTTMUST00000050220; OTTMUST00000050221; OTTMUST00000050222; uc029vwf.1; uc029vwg.1	RefSeq; MGI/Jackson Lab; ENSEMBL; NONCODE; Havana transcript; UCSC Genes	Mus musculus predicted gene 15401 (Gm15401), transcript variant 1, long non-coding RNA.; Mus musculus predicted gene 15401 (Gm15401), transcript variant 2, long non-coding RNA.; predicted gene 15401 ; predicted gene 15401 [gene_biotype:protein_coding transcript_biotype:protein_coding]; Non-coding transcript identified by NONCODE: Antisense; novel protein[gene_biotype:protein_coding transcript_bio…	chr6	LncRNA
TC0600001378.mm.1	4.08502	4.99702	-1.88165	0.0496517				NONMMUT058716; NONMMUT058717; NovelTID_00005492; NovelTID_00005493	NONCODE; Luo lincRNA	Non-coding transcript identified by NONCODE: Linc; Non-coding transcript identified by Luo, et al.	chr6	LncRNA
TC0600001580.mm.1	3.60126	2.99999	1.51705	0.0154476				NONMMUT059153	NONCODE	Non-coding transcript identified by NONCODE: Sense No Exonic	chr6	LncRNA
TC0600001583.mm.1	5.21163	4.60459	1.52313	0.0169234				NONMMUT059157	NONCODE	Non-coding transcript identified by NONCODE: Sense No Exonic	chr6	LncRNA
TC0600001584.mm.1	4.29822	3.58501	1.63944	0.028445				NONMMUT059158	NONCODE	Non-coding transcript identified by NONCODE: Sense No Exonic	chr6	LncRNA
TC0600001794.mm.1	4.15849	3.22806	1.90585	0.0314305				NONMMUT055562; NONMMUT055563; NovelTID_00005524; NovelTID_00005525	NONCODE; Luo lincRNA	Non-coding transcript identified by NONCODE: Linc; Non-coding transcript identified by Luo, et al.	chr6	LncRNA
TC0600002034.mm.1	4.71167	3.83298	1.8387	0.0158759				NONMMUT056257	NONCODE	Non-coding transcript identified by NONCODE: Sense No Exonic	chr6	LncRNA
TC0600002110.mm.1	4.21911	3.62213	1.51254	0.0480175				NONMMUT056495	NONCODE	Non-coding transcript identified by NONCODE: Sense No Exonic	chr6	LncRNA
TC0600002129.mm.1	4.71148	4.07934	1.54987	0.0183075	14321	Fth-ps2	ferritin heavy chain, pseudogene 2	OTTMUST00000089889; ENSMUST00000168364; NONMMUT056548	Havana transcript; ENSEMBL; NONCODE	ferritin heavy chain, pseudogene 2[gene_biotype:processed_pseudogene transcript_biotype:processed_pseudogene]; ferritin heavy chain, pseudogene 2 [gene_biotype:processed_pseudogene transcript_biotype:processed_pseudogene]; Non-coding transcript identified by NONCODE: Sense No Exonic	chr6	LncRNA
TC0700001320.mm.1	3.95953	2.77046	2.28006	0.00273186				KnowTID_00006609; NONMMUT062744	Luo lincRNA; NONCODE	Non-coding transcript identified by Luo, et al.; Non-coding transcript identified by NONCODE: Linc	chr7	LncRNA
TC0700001418.mm.1	4.53646	3.8772	1.57927	0.0254174				NONMMUT062956	NONCODE	Non-coding transcript identified by NONCODE: Sense No Exonic	chr7	LncRNA
TC0700001653.mm.1	2.47934	1.7676	1.63778	0.00716991				NONMMUT063269	NONCODE	Non-coding transcript identified by NONCODE: Sense No Exonic	chr7	LncRNA
TC0700001662.mm.1	4.10663	2.55853	2.92431	0.00450116				BC150970; NONMMUT063286; NONMMUT063287; uc012fsj.1	GenBank; NONCODE; UCSC Genes	Mus musculus RIKEN cDNA A630005I04 gene, mRNA (cDNA clone MGC:183883 IMAGE:9087883), complete cds.; Non-coding transcript identified by NONCODE: Sense No Exonic	chr7	LncRNA
TC0700001663.mm.1	2.85692	1.91329	1.92336	0.00904524				NONMMUT063288	NONCODE	Non-coding transcript identified by NONCODE: Sense No Exonic	chr7	LncRNA
TC0700001887.mm.1	6.0489	5.05757	1.98802	0.020363				NONMMUT063826	NONCODE	Non-coding transcript identified by NONCODE: Sense No Exonic	chr7	LncRNA
TC0700003428.mm.1	3.12918	3.82499	-1.61979	0.0217859				NONMMUT061892; NovelTID_00005872	NONCODE; Luo lincRNA	Non-coding transcript identified by NONCODE: Linc; Non-coding transcript identified by Luo, et al.	chr7	LncRNA
TC0700003713.mm.1	2.33782	1.74391	1.50933	0.0111372				NONMMUT062627	NONCODE	Non-coding transcript identified by NONCODE: Sense No Exonic	chr7	LncRNA
TC0700003768.mm.1	4.89542	5.67971	-1.72224	0.0171325				NONMMUT062842	NONCODE	Non-coding transcript identified by NONCODE: Linc	chr7	LncRNA
TC0700004254.mm.1	3.55976	4.26455	-1.6299	0.0176239				NONMMUT063591	NONCODE	Non-coding transcript identified by NONCODE: Linc	chr7	LncRNA
TC0800001004.mm.1	6.69878	5.72278	1.96701	0.0180153				NONMMUT066491	NONCODE	Non-coding transcript identified by NONCODE: Sense No Exonic	chr8	LncRNA
TC0800001005.mm.1	6.58709	5.66646	1.89294	0.0163862				NONMMUT066493	NONCODE	Non-coding transcript identified by NONCODE: Sense No Exonic	chr8	LncRNA
TC0800001409.mm.1	3.25188	4.07711	-1.77182	0.0262068				KnowTID_00007147; NONMMUT067380; NONMMUT067381	Luo lincRNA; NONCODE	Non-coding transcript identified by Luo, et al.; Non-coding transcript identified by NONCODE: Linc	chr8	LncRNA
TC0800001691.mm.1	6.11099	4.67555	2.70465	0.00420713				KnowTID_00007178; NONMMUT064571; uc009kuv.1	Luo lincRNA; NONCODE; UCSC Genes	Non-coding transcript identified by Luo, et al.; Non-coding transcript identified by NONCODE: Linc; Mus musculus adult male kidney cDNA, RIKEN full-length enriched library, clone:F530212E09 product:unclassifiable, full insert sequence.	chr8	LncRNA
TC0800002016.mm.1	6.67964	4.92312	3.37881	0.0085724				NONMMUT065169	NONCODE	Non-coding transcript identified by NONCODE: Sense No Exonic	chr8	LncRNA
TC0800002017.mm.1	6.19762	4.70512	2.81375	0.0244866				NONMMUT065170	NONCODE	Non-coding transcript identified by NONCODE: Sense No Exonic	chr8	LncRNA
TC0800002019.mm.1	6.3353	5.26393	2.10144	0.0231909				NONMMUT065172	NONCODE	Non-coding transcript identified by NONCODE: Sense No Exonic	chr8	LncRNA
TC0800002114.mm.1	7.03211	6.02993	2.00303	0.00228977				NONMMUT065391	NONCODE	Non-coding transcript identified by NONCODE: Sense No Exonic	chr8	LncRNA
TC0800002834.mm.1	3.3321	2.47117	1.81621	0.0128414				NONMMUT066980	NONCODE	Non-coding transcript identified by NONCODE: Sense No Exonic	chr8	LncRNA
TC0800002836.mm.1	5.24239	4.58942	1.5724	0.00176028				NONMMUT066982	NONCODE	Non-coding transcript identified by NONCODE: Sense No Exonic	chr8	LncRNA
TC0800002973.mm.1	2.89186	4.8885	-3.9907	0.00417648				NONMMUT067276	NONCODE	Non-coding transcript identified by NONCODE: Linc	chr8	LncRNA
TC0800002974.mm.1	3.47258	4.11395	-1.55981	0.023717				NONMMUT067277; NovelTID_00006223	NONCODE; Luo lincRNA	Non-coding transcript identified by NONCODE: Linc; Non-coding transcript identified by Luo, et al.	chr8	LncRNA
TC0800003020.mm.1	4.18393	5.14966	-1.95305	1.22693e-05				NONMMUT067397; NONMMUT067398; NONMMUT067399; NONMMUT067400; NONMMUT067401; NovelTID_00006230; NovelTID_00006231; NovelTID_00006232	NONCODE; Luo lincRNA	Non-coding transcript identified by NONCODE: Linc; Non-coding transcript identified by Luo, et al.	chr8	LncRNA
TC0800003166.mm.1	7.6199	6.07074	2.92647	0.000540562				NONMMUT067681; NONMMUT067682	NONCODE	Non-coding transcript identified by NONCODE: Linc	chr8	LncRNA
TC0800003204.mm.1	4.58254	5.21546	-1.5507	0.00852845	628856	Gm9909	predicted gene 9909	BC025186; NONMMUT067804	GenBank; NONCODE	Mus musculus predicted gene, ENSMUSG00000053531, mRNA (cDNA clone MGC:32466 IMAGE:5044645), complete cds.; Non-coding transcript identified by NONCODE: Antisense	chr8	LncRNA
TC0900000001.mm.1	10.3798	10.9901	-1.52654	0.0226109		Gm10718; Gm10722	predicted gene 10718 [Source:MGI Symbol;Acc:MGI:3642028]; predicted gene 10722 [Source:MGI Symbol;Acc:MGI:3642024]	ENSMUST00000099046; ENSMUST00000151376; NONMMUT067849	ENSEMBL; NONCODE	predicted gene 10718 [gene_biotype:protein_coding transcript_biotype:protein_coding]; predicted gene 10722 [gene_biotype:protein_coding transcript_biotype:protein_coding]; Non-coding transcript identified by NONCODE: Linc	chr9	LncRNA
TC0900000297.mm.1	5.06475	4.23781	1.77391	0.000385017				NONMMUT068524	NONCODE	Non-coding transcript identified by NONCODE: Sense No Exonic	chr9	LncRNA
TC0900000836.mm.1	6.86642	4.37014	5.64231	0.000414673				NONMMUT069603	NONCODE	Non-coding transcript identified by NONCODE: Sense No Exonic	chr9	LncRNA
TC0900000914.mm.1	6.30876	5.43213	1.83608	0.00767247				NONMMUT069818	NONCODE	Non-coding transcript identified by NONCODE: Sense No Exonic	chr9	LncRNA
TC0900001043.mm.1	4.1285	3.41391	1.64101	0.00580701				NONMMUT070116	NONCODE	Non-coding transcript identified by NONCODE: Sense No Exonic	chr9	LncRNA
TC0900001196.mm.1	7.19422	6.13942	2.07743	0.0127749				KnowTID_00007565; NONMMUT070487; NONMMUT070488; NONMMUT070489	Luo lincRNA; NONCODE	Non-coding transcript identified by Luo, et al.; Non-coding transcript identified by NONCODE: Linc	chr9	LncRNA
TC0900001379.mm.1	4.48547	5.23655	-1.68305	0.0168458		LOC100862215	PREDICTED: uncharacterized LOC100862215, transcript variant 1 (LOC100862215), miscRNA.; PREDICTED: uncharacterized LOC100862215, transcript variant 2 (LOC100862215), miscRNA.; PREDICTED: uncharacterized LOC100862215, transcript variant 3 (LOC100862215), miscRNA.; PREDICTED: uncharacterized LOC100862215, transcript variant 4 (LOC100862215), miscRNA.	XR_140959.1; XR_140960.1; XR_140961.1; XR_140962.1; NONMMUT070910; NONMMUT070911	MGI/Jackson Lab; NONCODE	PREDICTED: uncharacterized LOC100862215, transcript variant 1 (LOC100862215), miscRNA.; PREDICTED: uncharacterized LOC100862215, transcript variant 2 (LOC100862215), miscRNA.; PREDICTED: uncharacterized LOC100862215, transcript variant 3 (LOC100862215), miscRNA.; PREDICTED: uncharacterized LOC100862215, transcript variant 4 (LOC100862215), miscRNA.; Non-coding transcript identified by NONCODE: An…	chr9	LncRNA
TC0900001420.mm.1	3.73271	3.02282	1.63568	0.0245425				NONMMUT070988	NONCODE	Non-coding transcript identified by NONCODE: Sense No Exonic	chr9	LncRNA
TC0900001498.mm.1	4.50263	3.86764	1.55292	0.0394763				NONMMUT071163; NONMMUT071164; NONMMUT071165; NONMMUT071166; NovelTID_00006389; NovelTID_00006390; NovelTID_00006391	NONCODE; Luo lincRNA	Non-coding transcript identified by NONCODE: Linc; Non-coding transcript identified by Luo, et al.	chr9	LncRNA
TC0900001680.mm.1	8.77595	9.66415	-1.85087	0.0119741		Gm26870	predicted gene, 26870 [Source:MGI Symbol;Acc:MGI:5477364]	ENSMUST00000181242; ENSMUST00000181572; ENSMUST00000181957; NONMMUT067850; NONMMUT067851; NONMMUT067852; NONMMUT067853; NONMMUT067854; NONMMUT067855; NONMMUT067856; NONMMUT067857; NONMMUT067858; NONMMUT067859; NONMMUT067860; NONMMUT067861; NONMMUT067862; NONMMUT067863; NONMMUT067864; NONMMUT067865; NONMMUT067866	ENSEMBL; NONCODE	predicted gene, 26870 [gene_biotype:lincRNA transcript_biotype:lincRNA]; Non-coding transcript identified by NONCODE: Linc	chr9	LncRNA
TC0900001902.mm.1	3.04131	3.86338	-1.76795	0.0193697	69862	1810064F22Rik	RIKEN cDNA 1810064F22 gene; RIKEN cDNA 1810064F22 gene	NR_027981; BC147375; NR_027981.1; ENSMUST00000167359; NONMMUT068336; uc009ooe.1	RefSeq; GenBank; MGI/Jackson Lab; ENSEMBL; NONCODE; UCSC Genes	Mus musculus RIKEN cDNA 1810064F22 gene (1810064F22Rik), long non-coding RNA.; Mus musculus RIKEN cDNA 1810064F22 gene, mRNA (cDNA clone MGC:182536 IMAGE:9056430), complete cds.; RIKEN cDNA 1810064F22 gene ; RIKEN cDNA 1810064F22 gene [gene_biotype:antisense transcript_biotype:antisense]; Non-coding transcript identified by NONCODE: Linc	chr9	LncRNA
TC0900002006.mm.1	8.42898	7.41859	2.01445	0.0145535				NONMMUT068562	NONCODE	Non-coding transcript identified by NONCODE: Sense No Exonic	chr9	LncRNA
TC0900002447.mm.1	2.3954	4.42665	-4.0876	0.0090586				NONMMUT069456; NovelTID_00006478	NONCODE; Luo lincRNA	Non-coding transcript identified by NONCODE: Linc; Non-coding transcript identified by Luo, et al.	chr9	LncRNA
TC0900002709.mm.1	3.46183	2.61855	1.79413	0.0431905				NONMMUT070109; NONMMUT070110; NONMMUT070111; NovelTID_00006516; NovelTID_00006517; NovelTID_00006518; NovelTID_00006519	NONCODE; Luo lincRNA	Non-coding transcript identified by NONCODE: Linc; Non-coding transcript identified by Luo, et al.	chr9	LncRNA
TC0900002710.mm.1	6.60222	4.17608	5.37455	0.00667966				NONMMUT070113	NONCODE	Non-coding transcript identified by NONCODE: Linc	chr9	LncRNA
TC0900003184.mm.1	3.93907	3.19778	1.67167	0.0105165				NONMMUT071230	NONCODE	Non-coding transcript identified by NONCODE: Sense No Exonic	chr9	LncRNA
TC0900003187.mm.1	3.36137	2.41412	1.9282	0.00448503				NONMMUT071233	NONCODE	Non-coding transcript identified by NONCODE: Sense No Exonic	chr9	LncRNA
TC0X00001307.mm.1	5.08185	4.26767	1.7583	0.00437188				NONMMUT073942	NONCODE	Non-coding transcript identified by NONCODE: Sense No Exonic	chrX	LncRNA
TC0X00001327.mm.1	8.17675	7.59054	1.5013	0.00821954		Gm7973	predicted gene 7973 [Source:MGI Symbol;Acc:MGI:3647336]	ENSMUST00000122107; NONMMUT073989; OTTMUST00000044975	ENSEMBL; NONCODE; Havana transcript	predicted gene 7973 [gene_biotype:processed_pseudogene transcript_biotype:processed_pseudogene]; Non-coding transcript identified by NONCODE: Linc; basic transcription factor 3 (Btf3) pseudogene[gene_biotype:processed_pseudogene transcript_biotype:processed_pseudogene]	chrX	LncRNA
TC0X00002208.mm.1	4.78415	4.08746	1.62078	0.0124193				NONMMUT072428	NONCODE	Non-coding transcript identified by NONCODE: Sense No Exonic	chrX	LncRNA
TC0X00002558.mm.1	5.06905	4.43303	1.55403	0.0159842				NONMMUT073071	NONCODE	Non-coding transcript identified by NONCODE: Sense No Exonic	chrX	LncRNA
TC0X00003121.mm.1	5.11006	4.48358	1.54379	0.00887219		Gm8202	predicted gene 8202 [Source:MGI Symbol;Acc:MGI:3646496]	ENSMUST00000117682; NONMMUT074167; OTTMUST00000045370	ENSEMBL; NONCODE; Havana transcript	predicted gene 8202 [gene_biotype:processed_pseudogene transcript_biotype:processed_pseudogene]; Non-coding transcript identified by NONCODE: Linc; glutaredoxin (Glrx) pseudogene[gene_biotype:processed_pseudogene transcript_biotype:processed_pseudogene]	chrX	LncRNA
TC0X00003162.mm.1	5.25402	4.54983	1.62923	0.0171314				KnowTID_00008069; NONMMUT074304	Luo lincRNA; NONCODE	Non-coding transcript identified by Luo, et al.; Non-coding transcript identified by NONCODE: Linc	chrX	LncRNA
TC1000000387.mm.1	2.27119	2.93722	-1.5867	0.00269169				NONMMUT005438	NONCODE	Non-coding transcript identified by NONCODE: Linc	chr10	LncRNA
TC1000000694.mm.1	4.58849	3.96753	1.5379	0.0356257				NONMMUT006168; NONMMUT006169	NONCODE	Non-coding transcript identified by NONCODE: Sense No Exonic	chr10	LncRNA
TC1000001043.mm.1	1.99632	3.56932	-2.97523	0.0319153				NONMMUT006666	NONCODE	Non-coding transcript identified by NONCODE: Antisense	chr10	LncRNA
TC1000001064.mm.1	6.78206	8.08496	-2.46723	0.028625				NONMMUT006708	NONCODE	Non-coding transcript identified by NONCODE: Sense No Exonic	chr10	LncRNA
TC1000001261.mm.1	2.17757	2.96642	-1.7277	0.00542911				NONMMUT007231	NONCODE	Non-coding transcript identified by NONCODE: Sense No Exonic	chr10	LncRNA
TC1000001918.mm.1	6.86466	8.22806	-2.57291	0.00402345				KnowTID_00000908; NONMMUT005102	Luo lincRNA; NONCODE	Non-coding transcript identified by Luo, et al.; Non-coding transcript identified by NONCODE: Linc	chr10	LncRNA
TC1000002447.mm.1	5.258	4.5107	1.67865	0.0140326				KnowTID_00000988; NONMMUT006332	Luo lincRNA; NONCODE	Non-coding transcript identified by Luo, et al.; Non-coding transcript identified by NONCODE: Linc	chr10	LncRNA
TC1000002813.mm.1	4.19618	2.25656	3.83604	0.00920437				NONMMUT007218	NONCODE	Non-coding transcript identified by NONCODE: Linc	chr10	LncRNA
TC1000002830.mm.1	2.07512	2.72041	-1.56405	0.0261661				NONMMUT007254	NONCODE	Non-coding transcript identified by NONCODE: Sense No Exonic	chr10	LncRNA
TC1000002896.mm.1	6.37098	5.68542	1.60833	0.024024				NONMMUT007440	NONCODE	Non-coding transcript identified by NONCODE: Linc	chr10	LncRNA
TC1000003077.mm.1	6.96657	5.43686	2.88729	0.0370762				KnowTID_00001096; NONMMUT008003	Luo lincRNA; NONCODE	Non-coding transcript identified by Luo, et al.; Non-coding transcript identified by NONCODE: Linc	chr10	LncRNA
TC1100000193.mm.1	4.49973	3.66854	1.77916	0.00602818				NONMMUT008759	NONCODE	Non-coding transcript identified by NONCODE: Sense No Exonic	chr11	LncRNA
TC1100000325.mm.1	4.3373	3.34004	1.99621	0.0207245				NONMMUT009160; NONMMUT009161	NONCODE	Non-coding transcript identified by NONCODE: Sense No Exonic	chr11	LncRNA
TC1100001005.mm.1	6.23544	7.60244	-2.57934	0.00503085				NONMMUT010620; NONMMUT010621	NONCODE	Non-coding transcript identified by NONCODE: Sense No Exonic	chr11	LncRNA
TC1100001308.mm.1	2.1588	2.88987	-1.65987	0.00765252				NONMMUT011257	NONCODE	Non-coding transcript identified by NONCODE: Antisense	chr11	LncRNA
TC1100002245.mm.1	4.06228	4.83731	-1.71123	0.0125439				KnowTID_00001226; NONMMUT008652	Luo lincRNA; NONCODE	Non-coding transcript identified by Luo, et al.; Non-coding transcript identified by NONCODE: Linc	chr11	LncRNA
TC1100002321.mm.1	5.05751	4.39515	1.58267	0.0027904		Gm12040	predicted gene 12040 [Source:MGI Symbol;Acc:MGI:3651597]	ENSMUST00000118357; NONMMUT008811; OTTMUST00000011685	ENSEMBL; NONCODE; Havana transcript	predicted gene 12040 [gene_biotype:processed_pseudogene transcript_biotype:processed_pseudogene]; Non-coding transcript identified by NONCODE: Linc; novel pseudogene[gene_biotype:processed_pseudogene transcript_biotype:processed_pseudogene]	chr11	LncRNA
TC1100002707.mm.1	7.24485	6.37205	1.83121	0.0025203				NONMMUT009695	NONCODE	Non-coding transcript identified by NONCODE: Sense No Exonic	chr11	LncRNA
TC1100003463.mm.1	4.07364	3.45085	1.53985	0.0417502				NONMMUT011322	NONCODE	Non-coding transcript identified by NONCODE: Sense No Exonic	chr11	LncRNA
TC1100003924.mm.1	3.87991	4.73779	-1.81238	0.0145459				NONMMUT012372	NONCODE	Non-coding transcript identified by NONCODE: Linc	chr11	LncRNA
TC1100004154.mm.1	3.44625	4.11041	-1.58464	0.0183029				NONMMUT012957	NONCODE	Non-coding transcript identified by NONCODE: Sense No Exonic	chr11	LncRNA
TC1200000242.mm.1	4.66552	3.24314	2.68027	0.00651236				NONMMUT013782	NONCODE	Non-coding transcript identified by NONCODE: Linc	chr12	LncRNA
TC1200000280.mm.1	4.00401	4.73933	-1.66476	0.0436017	100504486	Gdap10	ganglioside-induced differentiation-associated-protein 10	NR_045032; BC052902; ENSMUST00000180613; NONMMUT013861; NONMMUT013862; uc029rrt.1	RefSeq; GenBank; ENSEMBL; NONCODE; UCSC Genes	Mus musculus ganglioside-induced differentiation-associated-protein 10 (Gdap10), long non-coding RNA.; Mus musculus ganglioside-induced differentiation-associated-protein 10, mRNA (cDNA clone MGC:60602 IMAGE:30067675), complete cds.; ganglioside-induced differentiation-associated-protein 10 [gene_biotype:lincRNA transcript_biotype:lincRNA]; Non-coding transcript identified by NONCODE: Sense No Ex…	chr12	LncRNA
TC1200000702.mm.1	6.39613	5.62511	1.70647	0.00140369				NONMMUT014761	NONCODE	Non-coding transcript identified by NONCODE: Sense No Exonic	chr12	LncRNA
TC1200000703.mm.1	5.75171	5.15759	1.50956	0.00389707				NONMMUT014762	NONCODE	Non-coding transcript identified by NONCODE: Sense No Exonic	chr12	LncRNA
TC1200000720.mm.1	3.03295	3.88304	-1.80261	0.0334719				NONMMUT014788	NONCODE	Non-coding transcript identified by NONCODE: Sense No Exonic	chr12	LncRNA
TC1200000722.mm.1	2.54415	3.69093	-2.21419	0.0145475				NONMMUT014791; NONMMUT014792	NONCODE	Non-coding transcript identified by NONCODE: Sense No Exonic	chr12	LncRNA
TC1200000724.mm.1	2.1948	3.36587	-2.2518	0.0136391				NONMMUT014794	NONCODE	Non-coding transcript identified by NONCODE: Sense No Exonic	chr12	LncRNA
TC1200001321.mm.1	3.59992	2.8347	1.69962	0.030327				NONMMUT016153	NONCODE	Non-coding transcript identified by NONCODE: Sense No Exonic	chr12	LncRNA
TC1200001584.mm.1	2.55785	3.22753	-1.59072	0.0414409				NONMMUT013816	NONCODE	Non-coding transcript identified by NONCODE: Sense No Exonic	chr12	LncRNA
TC1200001611.mm.1	4.83337	2.34543	5.60977	0.0335878				KnowTID_00001568; NONMMUT013860	Luo lincRNA; NONCODE	Non-coding transcript identified by Luo, et al.; Non-coding transcript identified by NONCODE: Linc	chr12	LncRNA
TC1200001894.mm.1	2.79305	4.15738	-2.57457	0.000327415				NONMMUT014565	NONCODE	Non-coding transcript identified by NONCODE: Linc	chr12	LncRNA
TC1200002050.mm.1	3.91371	3.32305	1.50594	0.0277977				NONMMUT014966	NONCODE	Non-coding transcript identified by NONCODE: Sense No Exonic	chr12	LncRNA
TC1200002051.mm.1	6.80126	5.80698	1.99209	0.0396621				NONMMUT014967	NONCODE	Non-coding transcript identified by NONCODE: Sense No Exonic	chr12	LncRNA
TC1300000917.mm.1	5.03592	5.64787	-1.52833	0.037012				KnowTID_00001880; NONMMUT018370	Luo lincRNA; NONCODE	Non-coding transcript identified by Luo, et al.; Non-coding transcript identified by NONCODE: Linc	chr13	LncRNA
TC1300000966.mm.1	4.24935	3.64207	1.52339	0.0329362				NONMMUT018470	NONCODE	Non-coding transcript identified by NONCODE: Linc	chr13	LncRNA
TC1300001227.mm.1	4.28373	3.63918	1.56325	0.0361023				NONMMUT019243; NONMMUT019244	NONCODE	Non-coding transcript identified by NONCODE: Sense No Exonic	chr13	LncRNA
TC1300001232.mm.1	3.27273	2.45418	1.76364	0.0301314				NONMMUT019250	NONCODE	Non-coding transcript identified by NONCODE: Sense No Exonic	chr13	LncRNA
TC1300001656.mm.1	3.6961	4.50421	-1.75092	0.00281606				NONMMUT016690	NONCODE	Non-coding transcript identified by NONCODE: Sense No Exonic	chr13	LncRNA
TC1300001657.mm.1	4.03543	4.71077	-1.59698	0.00275746				NONMMUT016692	NONCODE	Non-coding transcript identified by NONCODE: Sense No Exonic	chr13	LncRNA
TC1300001658.mm.1	5.15246	6.1899	-2.05258	0.0150225		Gm11340	predicted gene 11340 [Source:MGI Symbol;Acc:MGI:3652096]	ENSMUST00000119226; NONMMUT016693; OTTMUST00000001185	ENSEMBL; NONCODE; Havana transcript	predicted gene 11340 [gene_biotype:processed_pseudogene transcript_biotype:processed_pseudogene]; Non-coding transcript identified by NONCODE: Linc; ribosomal protein S19 (Rps19) pseudogene[gene_biotype:processed_pseudogene transcript_biotype:processed_pseudogene]	chr13	LncRNA
TC1300001659.mm.1	5.79841	6.65899	-1.81576	0.0344915				KnowTID_00002002; NONMMUT016694	Luo lincRNA; NONCODE	Non-coding transcript identified by Luo, et al.; Non-coding transcript identified by NONCODE: Linc	chr13	LncRNA
TC1300002589.mm.1	5.65212	4.8026	1.80189	0.00261951				NONMMUT018997	NONCODE	Non-coding transcript identified by NONCODE: Sense No Exonic	chr13	LncRNA
TC1400000128.mm.1	3.63142	2.87024	1.69488	0.0107036				NONMMUT019722	NONCODE	Non-coding transcript identified by NONCODE: Sense No Exonic	chr14	LncRNA
TC1400000156.mm.1	4.75258	3.67211	2.11472	0.00559599				NONMMUT019795; NONMMUT019796; NONMMUT019797; NONMMUT019798; NONMMUT019799; NONMMUT019800; NONMMUT019801; NONMMUT019802; NONMMUT019803; NONMMUT019804; NONMMUT019805; NONMMUT019806; NONMMUT019807; NONMMUT019808; NONMMUT019809; NONMMUT019810; NONMMUT019811; NONMMUT019812; NONMMUT019813; NONMMUT019814; NONMMUT019815; NONMMUT019816; NONMMUT019817; NONMMUT019818; NONMMUT019819; NONMMUT019820; NONMMUT01…	NONCODE; Luo lincRNA	Non-coding transcript identified by NONCODE: Linc; Non-coding transcript identified by Luo, et al.	chr14	LncRNA
TC1400000157.mm.1	4.15841	3.13579	2.03161	0.0232071				NONMMUT019826; NovelTID_00002103	NONCODE; Luo lincRNA	Non-coding transcript identified by NONCODE: Linc; Non-coding transcript identified by Luo, et al.	chr14	LncRNA
TC1400000180.mm.1	6.2525	5.54882	1.62866	0.0298517				NONMMUT019888	NONCODE	Non-coding transcript identified by NONCODE: Sense No Exonic	chr14	LncRNA
TC1400000186.mm.1	8.38019	7.60214	1.71481	0.0145728				NONMMUT019895	NONCODE	Non-coding transcript identified by NONCODE: Sense No Exonic	chr14	LncRNA
TC1400000272.mm.1	2.39352	3.04597	-1.57184	0.0468484				NONMMUT020116	NONCODE	Non-coding transcript identified by NONCODE: Linc	chr14	LncRNA
TC1400000273.mm.1	4.07665	4.88288	-1.74864	0.00234821				NONMMUT020120	NONCODE	Non-coding transcript identified by NONCODE: Sense No Exonic	chr14	LncRNA
TC1400000374.mm.1	5.4898	4.80716	1.60508	0.031839				NONMMUT020333	NONCODE	Non-coding transcript identified by NONCODE: Sense No Exonic	chr14	LncRNA
TC1400000375.mm.1	6.51859	5.63728	1.84205	0.0138144				NONMMUT020334	NONCODE	Non-coding transcript identified by NONCODE: Sense No Exonic	chr14	LncRNA
TC1400000839.mm.1	7.23505	6.5944	1.55904	0.00675707		Gm6913	predicted gene 6913 [Source:MGI Symbol;Acc:MGI:3648267]	ENSMUST00000100019; NONMMUT021103; OTTMUST00000081754	ENSEMBL; NONCODE; Havana transcript	predicted gene 6913 [gene_biotype:processed_pseudogene transcript_biotype:processed_pseudogene]; Non-coding transcript identified by NONCODE: Linc; eukaryotic translation initiation factor 1 (Eif1) pseudogene[gene_biotype:processed_pseudogene transcript_biotype:processed_pseudogene]	chr14	LncRNA
TC1400001509.mm.1	5.0344	4.14457	1.85295	0.0414881		Gm20699	predicted gene 20699 [Source:MGI Symbol;Acc:MGI:5313146]	ENSMUST00000177506; NONMMUT019773; OTTMUST00000110794	ENSEMBL; NONCODE; Havana transcript	predicted gene 20699 [gene_biotype:processed_pseudogene transcript_biotype:processed_pseudogene]; Non-coding transcript identified by NONCODE: Sense No Exonic; N-methyl-D-aspartate receptor-like [Rattus norvegicus] pseudogene[gene_biotype:processed_pseudogene transcript_biotype:processed_pseudogene]	chr14	LncRNA
TC1400001878.mm.1	3.3766	4.22363	-1.79879	0.0128455	11728	Ang-ps1	angiogenin, ribonuclease A family, pseudogene 1	OTTMUST00000087956; ENSMUST00000162314; NONMMUT020522	Havana transcript; ENSEMBL; NONCODE	angiogenin, ribonuclease A family, pseudogene 1[gene_biotype:unprocessed_pseudogene transcript_biotype:unprocessed_pseudogene]; angiogenin, ribonuclease A family, pseudogene 1 [gene_biotype:unprocessed_pseudogene transcript_biotype:unprocessed_pseudogene]; Non-coding transcript identified by NONCODE: Linc	chr14	LncRNA
TC1500000001.mm.1	2.5399	3.21148	-1.59281	0.002169				NONMMUT022577; NONMMUT022578; NovelTID_00002351; NovelTID_00002352	NONCODE; Luo lincRNA	Non-coding transcript identified by NONCODE: Linc; Non-coding transcript identified by Luo, et al.	chr15	LncRNA
TC1500000629.mm.1	2.67758	3.40137	-1.65152	0.00770498				NONMMUT024104; NONMMUT024105; NONMMUT024106; NovelTID_00002415; NovelTID_00002416; NovelTID_00002417	NONCODE; Luo lincRNA	Non-coding transcript identified by NONCODE: Linc; Non-coding transcript identified by Luo, et al.	chr15	LncRNA
TC1500000774.mm.1	3.03955	3.6624	-1.53992	0.00762505				NONMMUT024422; NONMMUT024423; NovelTID_00002431	NONCODE; Luo lincRNA	Non-coding transcript identified by NONCODE: Linc; Non-coding transcript identified by Luo, et al.	chr15	LncRNA
TC1500001137.mm.1	4.5559	5.29704	-1.67149	0.00633118				NONMMUT022585	NONCODE	Non-coding transcript identified by NONCODE: Sense No Exonic	chr15	LncRNA
TC1500001138.mm.1	4.45125	5.48078	-2.04135	0.000584304				NONMMUT022586; NONMMUT022587	NONCODE	Non-coding transcript identified by NONCODE: Sense No Exonic	chr15	LncRNA
TC1500001209.mm.1	3.53591	2.92673	1.52539	0.0168516				NONMMUT022750	NONCODE	Non-coding transcript identified by NONCODE: Sense No Exonic	chr15	LncRNA
TC1500001324.mm.1	3.90931	3.20566	1.62863	0.039166				NONMMUT023010	NONCODE	Non-coding transcript identified by NONCODE: Sense No Exonic	chr15	LncRNA
TC1500001692.mm.1	4.19368	3.489	1.62978	0.0234823				NONMMUT023879	NONCODE	Non-coding transcript identified by NONCODE: Sense No Exonic	chr15	LncRNA
TC1500001769.mm.1	3.99658	4.63079	-1.55209	0.00667037	100038659	Mirt2	myocardial infraction associated transcript 2	NR_045747; ENSMUST00000175179; NR_045747.1; NONMMUT024002; uc029ssh.1	RefSeq; ENSEMBL; MGI/Jackson Lab; NONCODE; UCSC Genes	Mus musculus myocardial infraction associated transcript 2 (Mirt2), long non-coding RNA.; predicted gene 10872 ; Non-coding transcript identified by NONCODE: Linc; Mus musculus predicted gene 10872 (Gm10872), long non-coding RNA.	chr15	LncRNA
TC1500001802.mm.1	4.2953	3.5608	1.66383	0.000959934				NONMMUT024077	NONCODE	Non-coding transcript identified by NONCODE: Sense No Exonic	chr15	LncRNA
TC1500001813.mm.1	3.10066	4.06134	-1.94623	0.000449327	76409	1700025B11Rik	RIKEN cDNA 1700025B11 gene; RIKEN cDNA 1700025B11 gene (1700025B11Rik), non-coding RNA.	NR_040310; NR_040310.1; KnowTID_00002988; NONMMUT024100; NONMMUT024101; uc007wnt.2	RefSeq; MGI/Jackson Lab; Luo lincRNA; NONCODE; UCSC Genes	Mus musculus RIKEN cDNA 1700025B11 gene (1700025B11Rik), long non-coding RNA.; RIKEN cDNA 1700025B11 gene (1700025B11Rik), non-coding RNA.; Non-coding transcript identified by Luo, et al.; Non-coding transcript identified by NONCODE: Linc	chr15	LncRNA
TC1600000247.mm.1	3.00043	2.04951	1.9331	0.0288858				NONMMUT025776; NovelTID_00002643	NONCODE; Luo lincRNA	Non-coding transcript identified by NONCODE: Linc; Non-coding transcript identified by Luo, et al.	chr16	LncRNA
TC1600000509.mm.1	9.14122	8.50118	1.55837	0.0386211	100503125	Gm10913	predicted pseudogene 10913	ENSMUST00000090238; XM_003085106.1; ENSMUST00000133732; NONMMUT026453; NONMMUT026454; OTTMUST00000070811	ENSEMBL; MGI/Jackson Lab; NONCODE; Havana transcript	predicted pseudogene 10913 ; predicted pseudogene 10913 [gene_biotype:processed_pseudogene transcript_biotype:processed_pseudogene]; Non-coding transcript identified by NONCODE: Linc; ribosomal protein L29 (Rpl29) pseudogene[gene_biotype:processed_pseudogene transcript_biotype:processed_pseudogene]	chr16	LncRNA
TC1600001630.mm.1	4.7207	3.28561	2.70399	0.00268152	100503040	Gm19522	predicted gene, 19522; predicted gene, 19522 (Gm19522), non-coding RNA.	NR_040402; NR_040402.1; NONMMUT026664; NONMMUT026665; uc007zfz.2	RefSeq; MGI/Jackson Lab; NONCODE; UCSC Genes	Mus musculus predicted gene, 19522 (Gm19522), long non-coding RNA.; predicted gene, 19522 (Gm19522), non-coding RNA.; Non-coding transcript identified by NONCODE: Linc	chr16	LncRNA
TC1600001672.mm.1	5.59606	4.83477	1.69501	0.00751404				NONMMUT026815	NONCODE	Non-coding transcript identified by NONCODE: Sense No Exonic	chr16	LncRNA
TC1700000986.mm.1	2.62499	1.9766	1.56741	0.0389494		Gm17377	predicted gene, 17377 [Source:MGI Symbol;Acc:MGI:4937011]	ENSMUST00000165184; NONMMUT030088	ENSEMBL; NONCODE	predicted gene, 17377 [gene_biotype:processed_pseudogene transcript_biotype:processed_pseudogene]; Non-coding transcript identified by NONCODE: Linc	chr17	LncRNA
TC1700001066.mm.1	6.00014	5.40173	1.51404	0.0173647				NONMMUT030249	NONCODE	Non-coding transcript identified by NONCODE: Sense No Exonic	chr17	LncRNA
TC1700001564.mm.1	4.11831	3.51656	1.51756	0.00470171				NONMMUT028521	NONCODE	Non-coding transcript identified by NONCODE: Sense No Exonic	chr17	LncRNA
TC1700002259.mm.1	3.32403	2.73025	1.50919	0.0385862				NONMMUT029990	NONCODE	Non-coding transcript identified by NONCODE: Sense No Exonic	chr17	LncRNA
TC1800000108.mm.1	4.08253	4.73521	-1.57209	0.0473744				NONMMUT031529	NONCODE	Non-coding transcript identified by NONCODE: Antisense	chr18	LncRNA
TC1800000161.mm.1	4.38453	2.55983	3.54233	0.00224447				NONMMUT031639	NONCODE	Non-coding transcript identified by NONCODE: Sense No Exonic	chr18	LncRNA
TC1800000162.mm.1	8.34326	7.14992	2.28681	0.00794351				NONMMUT031640; NONMMUT031641	NONCODE	Non-coding transcript identified by NONCODE: Linc	chr18	LncRNA
TC1800000348.mm.1	2.20525	2.83441	-1.54666	0.0265691	378472	Vaultrc5	vault RNA component 5; vault RNA component 5	NR_027885; ENSMUST00000083211; NR_027885.1; NONMMUT032025; uc012bbu.1	RefSeq; ENSEMBL; MGI/Jackson Lab; NONCODE; UCSC Genes	Mus musculus vault RNA component 5 (Vaultrc5), long non-coding RNA.; vault RNA component 5 ; Non-coding transcript identified by NONCODE: Linc	chr18	LncRNA
TC1800000667.mm.1	4.8398	4.21241	1.54477	0.0263439				NONMMUT032684	NONCODE	Non-coding transcript identified by NONCODE: Sense No Exonic	chr18	LncRNA
TC1800000999.mm.1	2.96343	3.77665	-1.75713	0.0194819		Gm7599	predicted gene 7599 [Source:MGI Symbol;Acc:MGI:3644309]	ENSMUST00000121453; NONMMUT031527; OTTMUST00000074711	ENSEMBL; NONCODE; Havana transcript	predicted gene 7599 [gene_biotype:processed_pseudogene transcript_biotype:processed_pseudogene]; Non-coding transcript identified by NONCODE: Antisense; novel ribosomal protein psuedogene[gene_biotype:processed_pseudogene transcript_biotype:processed_pseudogene]	chr18	LncRNA
TC1900000336.mm.1	6.98224	5.38661	3.02227	0.00178783				NONMMUT034121	NONCODE	Non-coding transcript identified by NONCODE: Sense No Exonic	chr19	LncRNA
TC1900000435.mm.1	4.05479	4.76705	-1.63838	0.00585455				NONMMUT034358	NONCODE	Non-coding transcript identified by NONCODE: Linc	chr19	LncRNA
TC1900000436.mm.1	2.906	3.84752	-1.92056	0.016333	791409	Gm9883	PREDICTED: predicted gene 9883 (Gm9883), miscRNA.	XR_141373.1; KnowTID_00004095; NONMMUT034359	MGI/Jackson Lab; Luo lincRNA; NONCODE	PREDICTED: predicted gene 9883 (Gm9883), miscRNA.; Non-coding transcript identified by Luo, et al.; Non-coding transcript identified by NONCODE: Linc	chr19	LncRNA
TC1900000462.mm.1	8.45214	7.83977	1.52876	0.000958979				NONMMUT034447; NONMMUT034448	NONCODE	Non-coding transcript identified by NONCODE: Linc	chr19	LncRNA
TC1900000707.mm.1	3.44425	4.22557	-1.71869	0.0115463				KnowTID_00004123; NONMMUT034961	Luo lincRNA; NONCODE	Non-coding transcript identified by Luo, et al.; Non-coding transcript identified by NONCODE: Linc	chr19	LncRNA
TC1900001040.mm.1	4.45977	3.74271	1.64383	0.0150648				NONMMUT033741	NONCODE	Non-coding transcript identified by NONCODE: Sense No Exonic	chr19	LncRNA
TC1900001223.mm.1	3.35738	2.3588	1.99803	0.0299418				NONMMUT034056	NONCODE	Non-coding transcript identified by NONCODE: Sense No Exonic	chr19	LncRNA
TC1900001356.mm.1	3.93539	2.90975	2.03585	0.0033886				NONMMUT034407	NONCODE	Non-coding transcript identified by NONCODE: Sense No Exonic	chr19	LncRNA
TC1900001424.mm.1	3.23133	3.846	-1.53121	0.0160893				NONMMUT034528	NONCODE	Non-coding transcript identified by NONCODE: Linc	chr19	LncRNA
