# Supplementary material for: The polysaccharide–peptide complex from mushroom Cordyceps militaris ameliorates atherosclerosis by modulating the lncRNA–miRNA–mRNA axis
Source: Royal Society of Chemistry journal article supplement (doi:10.1039/d1fo03285b), 2022-01-01
Supplement: d1fo03285b6.xlsx [file d1fo03285b6.xlsx]

## Sheet: Pathway
Gene Set Name	Description	Genes in Gene Set	Genes in Overlap	P-value	FDR	Count of AntibodyList
KEGG_PEROXISOME	Peroxisome	78	19	4.74e-24	1.91e-21	0
KEGG_FATTY_ACID_METABOLISM	Fatty acid metabolism	42	15	4e-22	8.06e-20	1
KEGG_PPAR_SIGNALING_PATHWAY	PPAR signaling pathway	69	15	1.93e-18	2.59e-16	0
KEGG_TRYPTOPHAN_METABOLISM	Tryptophan metabolism	40	11	4.11e-15	4.15e-13	1
KEGG_CIRCADIAN_RHYTHM_MAMMAL	Circadian rhythm - mammal	13	7	1.5e-12	1.21e-10	0
KEGG_DRUG_METABOLISM_CYTOCHROME_P450	Drug metabolism - cytochrome P450	72	11	4.39e-12	2.95e-10	0
KEGG_VALINE_LEUCINE_AND_ISOLEUCINE_DEGRADATION	Valine, leucine and isoleucine degradation	44	9	2.52e-11	1.45e-09	1
KEGG_METABOLISM_OF_XENOBIOTICS_BY_CYTOCHROME_P450	Metabolism of xenobiotics by cytochrome P450	70	10	8.37e-11	4.22e-09	0
KEGG_GLUTATHIONE_METABOLISM	Glutathione metabolism	50	8	2.62e-09	1.17e-07	0
KEGG_PROPANOATE_METABOLISM	Propanoate metabolism	33	7	3.29e-09	1.33e-07	1
KEGG_BUTANOATE_METABOLISM	Butanoate metabolism	34	7	4.12e-09	1.51e-07	0
KEGG_BIOSYNTHESIS_OF_UNSATURATED_FATTY_ACIDS	Biosynthesis of unsaturated fatty acids	22	6	8.71e-09	2.93e-07	0
KEGG_LYSINE_DEGRADATION	Lysine degradation	44	7	2.76e-08	8.56e-07	0
KEGG_TERPENOID_BACKBONE_BIOSYNTHESIS	Terpenoid backbone biosynthesis	15	5	5.17e-08	1.49e-06	0
KEGG_STEROID_BIOSYNTHESIS	Steroid biosynthesis	17	5	1.05e-07	2.83e-06	0
BIOCARTA_PPARA_PATHWAY	Mechanism of Gene Regulation by Peroxisome Proliferators via PPARa(alpha)	58	7	1.99e-07	5.01e-06	0
KEGG_BETA_ALANINE_METABOLISM	beta-Alanine metabolism	22	5	4.35e-07	1.03e-05	0
KEGG_ADIPOCYTOKINE_SIGNALING_PATHWAY	Adipocytokine signaling pathway	67	7	5.44e-07	1.22e-05	0
KEGG_RETINOL_METABOLISM	Retinol metabolism	64	6	6.8e-06	0.000144	0
KEGG_ABC_TRANSPORTERS	ABC transporters	44	5	1.58e-05	0.000317	0
KEGG_DRUG_METABOLISM_OTHER_ENZYMES	Drug metabolism - other enzymes	51	5	3.27e-05	0.000628	0
KEGG_LIMONENE_AND_PINENE_DEGRADATION	Limonene and pinene degradation	10	3	4.2e-05	0.00077	0
KEGG_GLYCINE_SERINE_AND_THREONINE_METABOLISM	Glycine, serine and threonine metabolism	31	4	6.97e-05	0.00122	0
KEGG_PANTOTHENATE_AND_COA_BIOSYNTHESIS	Pantothenate and CoA biosynthesis	16	3	0.00019	0.00298	0
KEGG_PRIMARY_BILE_ACID_BIOSYNTHESIS	Primary bile acid biosynthesis	16	3	0.00019	0.00298	0
KEGG_PYRUVATE_METABOLISM	Pyruvate metabolism	40	4	0.000192	0.00298	0
KEGG_PORPHYRIN_AND_CHLOROPHYLL_METABOLISM	Porphyrin and chlorophyll metabolism	41	4	0.000212	0.00316	0
KEGG_GLYCEROPHOSPHOLIPID_METABOLISM	Glycerophospholipid metabolism	77	5	0.000236	0.0034	0
KEGG_N_GLYCAN_BIOSYNTHESIS	N-Glycan biosynthesis	46	4	0.000332	0.00461	0
KEGG_GLYCEROLIPID_METABOLISM	Glycerolipid metabolism	49	4	0.000424	0.00569	0

## Sheet: Pathway_detail
Gene Set Name	Gene Id	Gene Symbol	Description	Fold Change	ANOVA p-value
KEGG_PEROXISOME	10901	DHRS4	dehydrogenase/reductase (SDR family) member 4	1.58677	0.00312422
KEGG_PEROXISOME	51703	ACSL5	acyl-CoA synthetase long-chain family member 5	1.6176	0.000648662
KEGG_PEROXISOME	847	CAT	catalase	1.60446	0.00171348
KEGG_PEROXISOME	5189	PEX1	peroxisomal biogenesis factor 1	1.57736	0.000796385
KEGG_PEROXISOME	5825	ABCD3	ATP-binding cassette, sub-family D (ALD), member 3	1.6066	0.00182228
KEGG_PEROXISOME	2180	ACSL1	acyl-CoA synthetase long-chain family member 1	3.24665	0.00047773
KEGG_PEROXISOME	1962	EHHADH	enoyl-CoA, hydratase/3-hydroxyacyl CoA dehydrogenase	9.64907	0.000126974
KEGG_PEROXISOME	1891	ECH1	enoyl CoA hydratase 1, peroxisomal	1.6658	0.00260057
KEGG_PEROXISOME	8800	PEX11A	peroxisomal biogenesis factor 11 alpha	3.57288	0.000654153
KEGG_PEROXISOME	54677	CROT	carnitine O-octanoyltransferase	1.87563	0.000840794
KEGG_PEROXISOME	26063	DECR2	2,4-dienoyl CoA reductase 2, peroxisomal	1.90336	0.004052
KEGG_PEROXISOME	51	ACOX1	acyl-CoA oxidase 1, palmitoyl	1.66627	0.00242207
KEGG_PEROXISOME	11264	PXMP4	peroxisomal membrane protein 4, 24kDa	3.12407	0.000191708
KEGG_PEROXISOME	26061	HACL1	2-hydroxyacyl-CoA lyase 1	2.10651	0.000775308
KEGG_PEROXISOME	225	ABCD2	ATP-binding cassette, sub-family D (ALD), member 2	1.80682	0.0319243
KEGG_PEROXISOME	2053	EPHX2	epoxide hydrolase 2, cytoplasmic	2.12978	0.000393204
KEGG_PEROXISOME	1384	CRAT	carnitine O-acetyltransferase	2.85378	0.00285356
KEGG_PEROXISOME	3295	HSD17B4	hydroxysteroid (17-beta) dehydrogenase 4	1.58035	0.000403005
KEGG_PEROXISOME	10455	ECI2	enoyl-CoA delta isomerase 2	1.74498	0.00178871
KEGG_FATTY_ACID_METABOLISM	33	ACADL	acyl-CoA dehydrogenase, long chain	1.72816	0.0028287
KEGG_FATTY_ACID_METABOLISM	34	ACADM	acyl-CoA dehydrogenase, C-4 to C-12 straight chain	1.99474	0.000454357
KEGG_FATTY_ACID_METABOLISM	224	ALDH3A2	aldehyde dehydrogenase 3 family, member A2	3.5243	0.00086725
KEGG_FATTY_ACID_METABOLISM	38	ACAT1	acetyl-CoA acetyltransferase 1	1.77339	0.000855305
KEGG_FATTY_ACID_METABOLISM	1375	CPT1B	carnitine palmitoyltransferase 1B (muscle)	1.50418	0.0301416
KEGG_FATTY_ACID_METABOLISM	1376	CPT2	carnitine palmitoyltransferase 2	2.1735	0.00144014
KEGG_FATTY_ACID_METABOLISM	3032	HADHB	hydroxyacyl-CoA dehydrogenase/3-ketoacyl-CoA thiolase/enoyl-CoA hydratase (trifunctional protein), beta subunit	1.92885	0.000229025
KEGG_FATTY_ACID_METABOLISM	51	ACOX1	acyl-CoA oxidase 1, palmitoyl	1.66627	0.00242207
KEGG_FATTY_ACID_METABOLISM	10455	ECI2	enoyl-CoA delta isomerase 2	1.74498	0.00178871
KEGG_FATTY_ACID_METABOLISM	3033	HADH	hydroxyacyl-CoA dehydrogenase	1.52063	0.000393585
KEGG_FATTY_ACID_METABOLISM	1632	ECI1	enoyl-CoA delta isomerase 1	1.7211	0.00210442
KEGG_FATTY_ACID_METABOLISM	51703	ACSL5	acyl-CoA synthetase long-chain family member 5	1.6176	0.000648662
KEGG_FATTY_ACID_METABOLISM	3030	HADHA	hydroxyacyl-CoA dehydrogenase/3-ketoacyl-CoA thiolase/enoyl-CoA hydratase (trifunctional protein), alpha subunit	1.54394	0.000306471
KEGG_FATTY_ACID_METABOLISM	1962	EHHADH	enoyl-CoA, hydratase/3-hydroxyacyl CoA dehydrogenase	9.64907	0.000126974
KEGG_FATTY_ACID_METABOLISM	2180	ACSL1	acyl-CoA synthetase long-chain family member 1	3.24665	0.00047773
KEGG_PPAR_SIGNALING_PATHWAY	51	ACOX1	acyl-CoA oxidase 1, palmitoyl	1.66627	0.00242207
KEGG_PPAR_SIGNALING_PATHWAY	1376	CPT2	carnitine palmitoyltransferase 2	2.1735	0.00144014
KEGG_PPAR_SIGNALING_PATHWAY	1375	CPT1B	carnitine palmitoyltransferase 1B (muscle)	1.50418	0.0301416
KEGG_PPAR_SIGNALING_PATHWAY	34	ACADM	acyl-CoA dehydrogenase, C-4 to C-12 straight chain	1.99474	0.000454357
KEGG_PPAR_SIGNALING_PATHWAY	2710	GK	glycerol kinase	1.6816	0.0019605
KEGG_PPAR_SIGNALING_PATHWAY	33	ACADL	acyl-CoA dehydrogenase, long chain	1.72816	0.0028287
KEGG_PPAR_SIGNALING_PATHWAY	3158	HMGCS2	3-hydroxy-3-methylglutaryl-CoA synthase 2 (mitochondrial)	1.69489	0.00079222
KEGG_PPAR_SIGNALING_PATHWAY	2180	ACSL1	acyl-CoA synthetase long-chain family member 1	3.24665	0.00047773
KEGG_PPAR_SIGNALING_PATHWAY	1962	EHHADH	enoyl-CoA, hydratase/3-hydroxyacyl CoA dehydrogenase	9.64907	0.000126974
KEGG_PPAR_SIGNALING_PATHWAY	1582	CYP8B1	cytochrome P450, family 8, subfamily B, polypeptide 1	3.55399	0.00785468
KEGG_PPAR_SIGNALING_PATHWAY	51703	ACSL5	acyl-CoA synthetase long-chain family member 5	1.6176	0.000648662
KEGG_PPAR_SIGNALING_PATHWAY	51129	ANGPTL4	angiopoietin-like 4	1.5661	0.00324162
KEGG_PPAR_SIGNALING_PATHWAY	2171	FABP5	fatty acid binding protein 5 (psoriasis-associated)	-1.73529	0.00148123
KEGG_PPAR_SIGNALING_PATHWAY	4199	ME1	malic enzyme 1, NADP(+)-dependent, cytosolic	1.98158	0.0424975
KEGG_PPAR_SIGNALING_PATHWAY	948	CD36	CD36 molecule (thrombospondin receptor)	2.56785	0.00632914
KEGG_TRYPTOPHAN_METABOLISM	3033	HADH	hydroxyacyl-CoA dehydrogenase	1.52063	0.000393585
KEGG_TRYPTOPHAN_METABOLISM	3030	HADHA	hydroxyacyl-CoA dehydrogenase/3-ketoacyl-CoA thiolase/enoyl-CoA hydratase (trifunctional protein), alpha subunit	1.54394	0.000306471
KEGG_TRYPTOPHAN_METABOLISM	847	CAT	catalase	1.60446	0.00171348
KEGG_TRYPTOPHAN_METABOLISM	51166	AADAT	aminoadipate aminotransferase	1.53724	0.0176972
KEGG_TRYPTOPHAN_METABOLISM	6999	TDO2	tryptophan 2,3-dioxygenase	1.54417	0.00989422
KEGG_TRYPTOPHAN_METABOLISM	1962	EHHADH	enoyl-CoA, hydratase/3-hydroxyacyl CoA dehydrogenase	9.64907	0.000126974
KEGG_TRYPTOPHAN_METABOLISM	224	ALDH3A2	aldehyde dehydrogenase 3 family, member A2	3.5243	0.00086725
KEGG_TRYPTOPHAN_METABOLISM	11185	INMT	indolethylamine N-methyltransferase	2.2319	0.0360656
KEGG_TRYPTOPHAN_METABOLISM	4129	MAOB	monoamine oxidase B	1.63753	0.00256494
KEGG_TRYPTOPHAN_METABOLISM	38	ACAT1	acetyl-CoA acetyltransferase 1	1.77339	0.000855305
KEGG_TRYPTOPHAN_METABOLISM	125061	AFMID	arylformamidase	2.05169	0.00261766
KEGG_CIRCADIAN_RHYTHM_MAMMAL	1407	CRY1	cryptochrome 1 (photolyase-like)	2.34398	0.00040721
KEGG_CIRCADIAN_RHYTHM_MAMMAL	9575	CLOCK	clock homolog (mouse)	1.77624	0.000602631
KEGG_CIRCADIAN_RHYTHM_MAMMAL	8863	PER3	period homolog 3 (Drosophila)	-2.01091	0.00111405
KEGG_CIRCADIAN_RHYTHM_MAMMAL	4862	NPAS2	neuronal PAS domain protein 2	2.11633	0.00161782
KEGG_CIRCADIAN_RHYTHM_MAMMAL	9572	NR1D1	nuclear receptor subfamily 1, group D, member 1	-2.71243	0.00139493
KEGG_CIRCADIAN_RHYTHM_MAMMAL	406	ARNTL	aryl hydrocarbon receptor nuclear translocator-like	3.5615	0.000290506
KEGG_CIRCADIAN_RHYTHM_MAMMAL	8553	BHLHE40	basic helix-loop-helix family, member e40	-1.53218	0.0447345
KEGG_DRUG_METABOLISM_CYTOCHROME_P450	2944	GSTM1	glutathione S-transferase mu 1	1.53353	0.0245594
KEGG_DRUG_METABOLISM_CYTOCHROME_P450	79799	UGT2A3	UDP glucuronosyltransferase 2 family, polypeptide A3	1.76358	0.0229191
KEGG_DRUG_METABOLISM_CYTOCHROME_P450	1576	CYP3A4	cytochrome P450, family 3, subfamily A, polypeptide 4	2.18741	0.000111938
KEGG_DRUG_METABOLISM_CYTOCHROME_P450	4129	MAOB	monoamine oxidase B	1.63753	0.00256494
KEGG_DRUG_METABOLISM_CYTOCHROME_P450	2950	GSTP1	glutathione S-transferase pi 1	1.63912	0.0200483
KEGG_DRUG_METABOLISM_CYTOCHROME_P450	2326	FMO1	flavin containing monooxygenase 1	1.84427	0.000408961
KEGG_DRUG_METABOLISM_CYTOCHROME_P450	9446	GSTO1	glutathione S-transferase omega 1	1.52302	0.00912031
KEGG_DRUG_METABOLISM_CYTOCHROME_P450	7363	UGT2B4	UDP glucuronosyltransferase 2 family, polypeptide B4	1.69942	0.0412316
KEGG_DRUG_METABOLISM_CYTOCHROME_P450	2941	GSTA4	glutathione S-transferase alpha 4	1.59347	0.049026
KEGG_DRUG_METABOLISM_CYTOCHROME_P450	2939	GSTA2	glutathione S-transferase alpha 2	2.34296	0.0223154
KEGG_DRUG_METABOLISM_CYTOCHROME_P450	2940	GSTA3	glutathione S-transferase alpha 3	1.75395	0.0010179
KEGG_VALINE_LEUCINE_AND_ISOLEUCINE_DEGRADATION	4329	ALDH6A1	aldehyde dehydrogenase 6 family, member A1	1.55718	0.0130025
KEGG_VALINE_LEUCINE_AND_ISOLEUCINE_DEGRADATION	3032	HADHB	hydroxyacyl-CoA dehydrogenase/3-ketoacyl-CoA thiolase/enoyl-CoA hydratase (trifunctional protein), beta subunit	1.92885	0.000229025
KEGG_VALINE_LEUCINE_AND_ISOLEUCINE_DEGRADATION	3158	HMGCS2	3-hydroxy-3-methylglutaryl-CoA synthase 2 (mitochondrial)	1.69489	0.00079222
KEGG_VALINE_LEUCINE_AND_ISOLEUCINE_DEGRADATION	34	ACADM	acyl-CoA dehydrogenase, C-4 to C-12 straight chain	1.99474	0.000454357
KEGG_VALINE_LEUCINE_AND_ISOLEUCINE_DEGRADATION	224	ALDH3A2	aldehyde dehydrogenase 3 family, member A2	3.5243	0.00086725
KEGG_VALINE_LEUCINE_AND_ISOLEUCINE_DEGRADATION	38	ACAT1	acetyl-CoA acetyltransferase 1	1.77339	0.000855305
KEGG_VALINE_LEUCINE_AND_ISOLEUCINE_DEGRADATION	3030	HADHA	hydroxyacyl-CoA dehydrogenase/3-ketoacyl-CoA thiolase/enoyl-CoA hydratase (trifunctional protein), alpha subunit	1.54394	0.000306471
KEGG_VALINE_LEUCINE_AND_ISOLEUCINE_DEGRADATION	1962	EHHADH	enoyl-CoA, hydratase/3-hydroxyacyl CoA dehydrogenase	9.64907	0.000126974
KEGG_VALINE_LEUCINE_AND_ISOLEUCINE_DEGRADATION	3033	HADH	hydroxyacyl-CoA dehydrogenase	1.52063	0.000393585
KEGG_METABOLISM_OF_XENOBIOTICS_BY_CYTOCHROME_P450	9446	GSTO1	glutathione S-transferase omega 1	1.52302	0.00912031
KEGG_METABOLISM_OF_XENOBIOTICS_BY_CYTOCHROME_P450	7363	UGT2B4	UDP glucuronosyltransferase 2 family, polypeptide B4	1.69942	0.0412316
KEGG_METABOLISM_OF_XENOBIOTICS_BY_CYTOCHROME_P450	2939	GSTA2	glutathione S-transferase alpha 2	2.34296	0.0223154
KEGG_METABOLISM_OF_XENOBIOTICS_BY_CYTOCHROME_P450	2941	GSTA4	glutathione S-transferase alpha 4	1.59347	0.049026
KEGG_METABOLISM_OF_XENOBIOTICS_BY_CYTOCHROME_P450	2052	EPHX1	epoxide hydrolase 1, microsomal (xenobiotic)	2.1115	0.00232446
KEGG_METABOLISM_OF_XENOBIOTICS_BY_CYTOCHROME_P450	2940	GSTA3	glutathione S-transferase alpha 3	1.75395	0.0010179
KEGG_METABOLISM_OF_XENOBIOTICS_BY_CYTOCHROME_P450	2944	GSTM1	glutathione S-transferase mu 1	1.53353	0.0245594
KEGG_METABOLISM_OF_XENOBIOTICS_BY_CYTOCHROME_P450	1576	CYP3A4	cytochrome P450, family 3, subfamily A, polypeptide 4	2.18741	0.000111938
KEGG_METABOLISM_OF_XENOBIOTICS_BY_CYTOCHROME_P450	79799	UGT2A3	UDP glucuronosyltransferase 2 family, polypeptide A3	1.76358	0.0229191
KEGG_METABOLISM_OF_XENOBIOTICS_BY_CYTOCHROME_P450	2950	GSTP1	glutathione S-transferase pi 1	1.63912	0.0200483
KEGG_GLUTATHIONE_METABOLISM	2941	GSTA4	glutathione S-transferase alpha 4	1.59347	0.049026
KEGG_GLUTATHIONE_METABOLISM	2939	GSTA2	glutathione S-transferase alpha 2	2.34296	0.0223154
KEGG_GLUTATHIONE_METABOLISM	4953	ODC1	ornithine decarboxylase 1	1.62416	0.00584339
KEGG_GLUTATHIONE_METABOLISM	9446	GSTO1	glutathione S-transferase omega 1	1.52302	0.00912031
KEGG_GLUTATHIONE_METABOLISM	2940	GSTA3	glutathione S-transferase alpha 3	1.75395	0.0010179
KEGG_GLUTATHIONE_METABOLISM	2944	GSTM1	glutathione S-transferase mu 1	1.53353	0.0245594
KEGG_GLUTATHIONE_METABOLISM	2729	GCLC	glutamate-cysteine ligase, catalytic subunit	1.91732	0.0112782
KEGG_GLUTATHIONE_METABOLISM	2950	GSTP1	glutathione S-transferase pi 1	1.63912	0.0200483
KEGG_PROPANOATE_METABOLISM	4329	ALDH6A1	aldehyde dehydrogenase 6 family, member A1	1.55718	0.0130025
KEGG_PROPANOATE_METABOLISM	38	ACAT1	acetyl-CoA acetyltransferase 1	1.77339	0.000855305
KEGG_PROPANOATE_METABOLISM	34	ACADM	acyl-CoA dehydrogenase, C-4 to C-12 straight chain	1.99474	0.000454357
KEGG_PROPANOATE_METABOLISM	224	ALDH3A2	aldehyde dehydrogenase 3 family, member A2	3.5243	0.00086725
KEGG_PROPANOATE_METABOLISM	1962	EHHADH	enoyl-CoA, hydratase/3-hydroxyacyl CoA dehydrogenase	9.64907	0.000126974
KEGG_PROPANOATE_METABOLISM	79611	ACSS3	acyl-CoA synthetase short-chain family member 3	2.04006	0.0150236
KEGG_PROPANOATE_METABOLISM	3030	HADHA	hydroxyacyl-CoA dehydrogenase/3-ketoacyl-CoA thiolase/enoyl-CoA hydratase (trifunctional protein), alpha subunit	1.54394	0.000306471
KEGG_BUTANOATE_METABOLISM	3030	HADHA	hydroxyacyl-CoA dehydrogenase/3-ketoacyl-CoA thiolase/enoyl-CoA hydratase (trifunctional protein), alpha subunit	1.54394	0.000306471
KEGG_BUTANOATE_METABOLISM	1962	EHHADH	enoyl-CoA, hydratase/3-hydroxyacyl CoA dehydrogenase	9.64907	0.000126974
KEGG_BUTANOATE_METABOLISM	3033	HADH	hydroxyacyl-CoA dehydrogenase	1.52063	0.000393585
KEGG_BUTANOATE_METABOLISM	6296	ACSM3	acyl-CoA synthetase medium-chain family member 3	1.55279	0.0151525
KEGG_BUTANOATE_METABOLISM	3158	HMGCS2	3-hydroxy-3-methylglutaryl-CoA synthase 2 (mitochondrial)	1.69489	0.00079222
KEGG_BUTANOATE_METABOLISM	224	ALDH3A2	aldehyde dehydrogenase 3 family, member A2	3.5243	0.00086725
KEGG_BUTANOATE_METABOLISM	38	ACAT1	acetyl-CoA acetyltransferase 1	1.77339	0.000855305
KEGG_BIOSYNTHESIS_OF_UNSATURATED_FATTY_ACIDS	3030	HADHA	hydroxyacyl-CoA dehydrogenase/3-ketoacyl-CoA thiolase/enoyl-CoA hydratase (trifunctional protein), alpha subunit	1.54394	0.000306471
KEGG_BIOSYNTHESIS_OF_UNSATURATED_FATTY_ACIDS	10965	ACOT2	acyl-CoA thioesterase 2	4.63269	0.0062207
KEGG_BIOSYNTHESIS_OF_UNSATURATED_FATTY_ACIDS	641371	ACOT1	acyl-CoA thioesterase 1	9.21084	0.000784115
KEGG_BIOSYNTHESIS_OF_UNSATURATED_FATTY_ACIDS	51	ACOX1	acyl-CoA oxidase 1, palmitoyl	1.66627	0.00242207
KEGG_BIOSYNTHESIS_OF_UNSATURATED_FATTY_ACIDS	60481	ELOVL5	ELOVL fatty acid elongase 5	2.31279	0.00910325
KEGG_BIOSYNTHESIS_OF_UNSATURATED_FATTY_ACIDS	122970	ACOT4	acyl-CoA thioesterase 4	3.38432	0.00368984
KEGG_LYSINE_DEGRADATION	38	ACAT1	acetyl-CoA acetyltransferase 1	1.77339	0.000855305
KEGG_LYSINE_DEGRADATION	224	ALDH3A2	aldehyde dehydrogenase 3 family, member A2	3.5243	0.00086725
KEGG_LYSINE_DEGRADATION	8424	BBOX1	butyrobetaine (gamma), 2-oxoglutarate dioxygenase (gamma-butyrobetaine hydroxylase) 1	1.59043	0.00889699
KEGG_LYSINE_DEGRADATION	3033	HADH	hydroxyacyl-CoA dehydrogenase	1.52063	0.000393585
KEGG_LYSINE_DEGRADATION	1962	EHHADH	enoyl-CoA, hydratase/3-hydroxyacyl CoA dehydrogenase	9.64907	0.000126974
KEGG_LYSINE_DEGRADATION	51166	AADAT	aminoadipate aminotransferase	1.53724	0.0176972
KEGG_LYSINE_DEGRADATION	3030	HADHA	hydroxyacyl-CoA dehydrogenase/3-ketoacyl-CoA thiolase/enoyl-CoA hydratase (trifunctional protein), alpha subunit	1.54394	0.000306471
KEGG_TERPENOID_BACKBONE_BIOSYNTHESIS	3422	IDI1	isopentenyl-diphosphate delta isomerase 1	-3.14131	0.000814091
KEGG_TERPENOID_BACKBONE_BIOSYNTHESIS	38	ACAT1	acetyl-CoA acetyltransferase 1	1.77339	0.000855305
KEGG_TERPENOID_BACKBONE_BIOSYNTHESIS	3158	HMGCS2	3-hydroxy-3-methylglutaryl-CoA synthase 2 (mitochondrial)	1.69489	0.00079222
KEGG_TERPENOID_BACKBONE_BIOSYNTHESIS	3156	HMGCR	3-hydroxy-3-methylglutaryl-CoA reductase	-1.61115	0.0191748
KEGG_TERPENOID_BACKBONE_BIOSYNTHESIS	2224	FDPS	farnesyl diphosphate synthase	-2.6974	0.00172661
KEGG_STEROID_BIOSYNTHESIS	1595	CYP51A1	cytochrome P450, family 51, subfamily A, polypeptide 1	-2.46406	0.00328032
KEGG_STEROID_BIOSYNTHESIS	1718	DHCR24	24-dehydrocholesterol reductase	-1.58136	0.0182725
KEGG_STEROID_BIOSYNTHESIS	50814	NSDHL	NAD(P) dependent steroid dehydrogenase-like	-2.14416	0.00831368
KEGG_STEROID_BIOSYNTHESIS	3988	LIPA	lipase A, lysosomal acid, cholesterol esterase	1.61684	0.00596293
KEGG_STEROID_BIOSYNTHESIS	6713	SQLE	squalene epoxidase	-2.98702	0.00195107
BIOCARTA_PPARA_PATHWAY	4199	ME1	malic enzyme 1, NADP(+)-dependent, cytosolic	1.98158	0.0424975
BIOCARTA_PPARA_PATHWAY	948	CD36	CD36 molecule (thrombospondin receptor)	2.56785	0.00632914
BIOCARTA_PPARA_PATHWAY	5970	RELA	v-rel reticuloendotheliosis viral oncogene homolog A (avian)	1.53339	0.0222273
BIOCARTA_PPARA_PATHWAY	1962	EHHADH	enoyl-CoA, hydratase/3-hydroxyacyl CoA dehydrogenase	9.64907	0.000126974
BIOCARTA_PPARA_PATHWAY	1375	CPT1B	carnitine palmitoyltransferase 1B (muscle)	1.50418	0.0301416
BIOCARTA_PPARA_PATHWAY	3295	HSD17B4	hydroxysteroid (17-beta) dehydrogenase 4	1.58035	0.000403005
BIOCARTA_PPARA_PATHWAY	51	ACOX1	acyl-CoA oxidase 1, palmitoyl	1.66627	0.00242207
KEGG_BETA_ALANINE_METABOLISM	1962	EHHADH	enoyl-CoA, hydratase/3-hydroxyacyl CoA dehydrogenase	9.64907	0.000126974
KEGG_BETA_ALANINE_METABOLISM	3030	HADHA	hydroxyacyl-CoA dehydrogenase/3-ketoacyl-CoA thiolase/enoyl-CoA hydratase (trifunctional protein), alpha subunit	1.54394	0.000306471
KEGG_BETA_ALANINE_METABOLISM	1807	DPYS	dihydropyrimidinase	1.53281	0.00564242
KEGG_BETA_ALANINE_METABOLISM	224	ALDH3A2	aldehyde dehydrogenase 3 family, member A2	3.5243	0.00086725
KEGG_BETA_ALANINE_METABOLISM	34	ACADM	acyl-CoA dehydrogenase, C-4 to C-12 straight chain	1.99474	0.000454357
KEGG_ADIPOCYTOKINE_SIGNALING_PATHWAY	948	CD36	CD36 molecule (thrombospondin receptor)	2.56785	0.00632914
KEGG_ADIPOCYTOKINE_SIGNALING_PATHWAY	3953	LEPR	leptin receptor	1.63649	0.00281941
KEGG_ADIPOCYTOKINE_SIGNALING_PATHWAY	51703	ACSL5	acyl-CoA synthetase long-chain family member 5	1.6176	0.000648662
KEGG_ADIPOCYTOKINE_SIGNALING_PATHWAY	8660	IRS2	insulin receptor substrate 2	1.76076	0.0410914
KEGG_ADIPOCYTOKINE_SIGNALING_PATHWAY	5970	RELA	v-rel reticuloendotheliosis viral oncogene homolog A (avian)	1.53339	0.0222273
KEGG_ADIPOCYTOKINE_SIGNALING_PATHWAY	2180	ACSL1	acyl-CoA synthetase long-chain family member 1	3.24665	0.00047773
KEGG_ADIPOCYTOKINE_SIGNALING_PATHWAY	1375	CPT1B	carnitine palmitoyltransferase 1B (muscle)	1.50418	0.0301416
KEGG_RETINOL_METABOLISM	54884	RETSAT	retinol saturase (all-trans-retinol 13,14-reductase)	4.89906	9.08576e-05
KEGG_RETINOL_METABOLISM	1576	CYP3A4	cytochrome P450, family 3, subfamily A, polypeptide 4	2.18741	0.000111938
KEGG_RETINOL_METABOLISM	79799	UGT2A3	UDP glucuronosyltransferase 2 family, polypeptide A3	1.76358	0.0229191
KEGG_RETINOL_METABOLISM	8608	RDH16	retinol dehydrogenase 16 (all-trans)	1.6667	0.00456152
KEGG_RETINOL_METABOLISM	7363	UGT2B4	UDP glucuronosyltransferase 2 family, polypeptide B4	1.69942	0.0412316
KEGG_RETINOL_METABOLISM	10901	DHRS4	dehydrogenase/reductase (SDR family) member 4	1.58677	0.00312422
KEGG_ABC_TRANSPORTERS	5244	ABCB4	ATP-binding cassette, sub-family B (MDR/TAP), member 4	1.52019	0.0043556
KEGG_ABC_TRANSPORTERS	5825	ABCD3	ATP-binding cassette, sub-family D (ALD), member 3	1.6066	0.00182228
KEGG_ABC_TRANSPORTERS	9429	ABCG2	ATP-binding cassette, sub-family G (WHITE), member 2	1.80371	0.00152641
KEGG_ABC_TRANSPORTERS	8714	ABCC3	ATP-binding cassette, sub-family C (CFTR/MRP), member 3	2.14302	0.00354122
KEGG_ABC_TRANSPORTERS	225	ABCD2	ATP-binding cassette, sub-family D (ALD), member 2	1.80682	0.0319243
KEGG_DRUG_METABOLISM_OTHER_ENZYMES	1807	DPYS	dihydropyrimidinase	1.53281	0.00564242
KEGG_DRUG_METABOLISM_OTHER_ENZYMES	7363	UGT2B4	UDP glucuronosyltransferase 2 family, polypeptide B4	1.69942	0.0412316
KEGG_DRUG_METABOLISM_OTHER_ENZYMES	1890	TYMP	thymidine phosphorylase	2.07655	0.0062045
KEGG_DRUG_METABOLISM_OTHER_ENZYMES	79799	UGT2A3	UDP glucuronosyltransferase 2 family, polypeptide A3	1.76358	0.0229191
KEGG_DRUG_METABOLISM_OTHER_ENZYMES	1576	CYP3A4	cytochrome P450, family 3, subfamily A, polypeptide 4	2.18741	0.000111938
KEGG_LIMONENE_AND_PINENE_DEGRADATION	224	ALDH3A2	aldehyde dehydrogenase 3 family, member A2	3.5243	0.00086725
KEGG_LIMONENE_AND_PINENE_DEGRADATION	3030	HADHA	hydroxyacyl-CoA dehydrogenase/3-ketoacyl-CoA thiolase/enoyl-CoA hydratase (trifunctional protein), alpha subunit	1.54394	0.000306471
KEGG_LIMONENE_AND_PINENE_DEGRADATION	1962	EHHADH	enoyl-CoA, hydratase/3-hydroxyacyl CoA dehydrogenase	9.64907	0.000126974
KEGG_GLYCINE_SERINE_AND_THREONINE_METABOLISM	635	BHMT	betaine--homocysteine S-methyltransferase	1.70162	0.0343933
KEGG_GLYCINE_SERINE_AND_THREONINE_METABOLISM	4129	MAOB	monoamine oxidase B	1.63753	0.00256494
KEGG_GLYCINE_SERINE_AND_THREONINE_METABOLISM	2731	GLDC	glycine dehydrogenase (decarboxylating)	2.24637	0.000863899
KEGG_GLYCINE_SERINE_AND_THREONINE_METABOLISM	1491	CTH	cystathionase (cystathionine gamma-lyase)	1.64867	0.00943928
KEGG_PANTOTHENATE_AND_COA_BIOSYNTHESIS	1807	DPYS	dihydropyrimidinase	1.53281	0.00564242
KEGG_PANTOTHENATE_AND_COA_BIOSYNTHESIS	53354	PANK1	pantothenate kinase 1	1.50012	0.00261402
KEGG_PANTOTHENATE_AND_COA_BIOSYNTHESIS	8876	VNN1	vanin 1	3.1305	0.000774131
KEGG_PRIMARY_BILE_ACID_BIOSYNTHESIS	3295	HSD17B4	hydroxysteroid (17-beta) dehydrogenase 4	1.58035	0.000403005
KEGG_PRIMARY_BILE_ACID_BIOSYNTHESIS	1582	CYP8B1	cytochrome P450, family 8, subfamily B, polypeptide 1	3.55399	0.00785468
KEGG_PRIMARY_BILE_ACID_BIOSYNTHESIS	51302	CYP39A1	cytochrome P450, family 39, subfamily A, polypeptide 1	2.42464	0.00251403
KEGG_PYRUVATE_METABOLISM	224	ALDH3A2	aldehyde dehydrogenase 3 family, member A2	3.5243	0.00086725
KEGG_PYRUVATE_METABOLISM	38	ACAT1	acetyl-CoA acetyltransferase 1	1.77339	0.000855305
KEGG_PYRUVATE_METABOLISM	134526	ACOT12	acyl-CoA thioesterase 12	1.89251	0.0005775
KEGG_PYRUVATE_METABOLISM	4199	ME1	malic enzyme 1, NADP(+)-dependent, cytosolic	1.98158	0.0424975
KEGG_PORPHYRIN_AND_CHLOROPHYLL_METABOLISM	7363	UGT2B4	UDP glucuronosyltransferase 2 family, polypeptide B4	1.69942	0.0412316
KEGG_PORPHYRIN_AND_CHLOROPHYLL_METABOLISM	3162	HMOX1	heme oxygenase (decycling) 1	1.56257	0.0232432
KEGG_PORPHYRIN_AND_CHLOROPHYLL_METABOLISM	1371	CPOX	coproporphyrinogen oxidase	1.91579	0.000180559
KEGG_PORPHYRIN_AND_CHLOROPHYLL_METABOLISM	79799	UGT2A3	UDP glucuronosyltransferase 2 family, polypeptide A3	1.76358	0.0229191
KEGG_GLYCEROPHOSPHOLIPID_METABOLISM	10555	AGPAT2	1-acylglycerol-3-phosphate O-acyltransferase 2 (lysophosphatidic acid acyltransferase, beta)	1.89944	0.00515849
KEGG_GLYCEROPHOSPHOLIPID_METABOLISM	3931	LCAT	lecithin-cholesterol acyltransferase	1.64584	0.0152627
KEGG_GLYCEROPHOSPHOLIPID_METABOLISM	10400	PEMT	phosphatidylethanolamine N-methyltransferase	1.51585	0.0193472
KEGG_GLYCEROPHOSPHOLIPID_METABOLISM	2820	GPD2	glycerol-3-phosphate dehydrogenase 2 (mitochondrial)	1.58725	0.0356215
KEGG_GLYCEROPHOSPHOLIPID_METABOLISM	1119	CHKA	choline kinase alpha	2.68308	0.00340228
KEGG_N_GLYCAN_BIOSYNTHESIS	10195	ALG3	asparagine-linked glycosylation 3, alpha-1,3- mannosyltransferase homolog (S. cerevisiae)	1.6181	0.0213585
KEGG_N_GLYCAN_BIOSYNTHESIS	201595	STT3B	STT3, subunit of the oligosaccharyltransferase complex, homolog B (S. cerevisiae)	1.72235	0.00723731
KEGG_N_GLYCAN_BIOSYNTHESIS	1603	DAD1	defender against cell death 1	1.9138	0.00850953
KEGG_N_GLYCAN_BIOSYNTHESIS	79087	ALG12	asparagine-linked glycosylation 12, alpha-1,6-mannosyltransferase homolog (S. cerevisiae)	1.55588	0.0161877
KEGG_GLYCEROLIPID_METABOLISM	11343	MGLL	monoglyceride lipase	1.86235	0.00245045
KEGG_GLYCEROLIPID_METABOLISM	2710	GK	glycerol kinase	1.6816	0.0019605
KEGG_GLYCEROLIPID_METABOLISM	224	ALDH3A2	aldehyde dehydrogenase 3 family, member A2	3.5243	0.00086725
KEGG_GLYCEROLIPID_METABOLISM	10555	AGPAT2	1-acylglycerol-3-phosphate O-acyltransferase 2 (lysophosphatidic acid acyltransferase, beta)	1.89944	0.00515849

## Sheet: GO-BP
Gene Set Name	Description	Genes in Gene Set	Genes in Overlap	P-value	FDR	Count of AntibodyList
GO_SMALL_MOLECULE_METABOLIC_PROCESS	The chemical reactions and pathways involving small molecules, any low molecular weight, monomeric, non-encoded molecule.	1767	113	5.29e-75	2.34e-71	2
GO_LIPID_METABOLIC_PROCESS	The chemical reactions and pathways involving lipids, compounds soluble in an organic solvent but not, or sparingly, in an aqueous solvent. Includes fatty acids; neutral fats, other fatty-acid esters, and soaps; long-chain (fatty) alcohols and waxes; sphingoids and other long-chain bases; glycolipids, phospholipids and sphingolipids; and carotenes, polyprenols, sterols, terpenes and other isopren…	1158	91	3.35e-67	7.42e-64	1
GO_ORGANIC_ACID_METABOLIC_PROCESS	The chemical reactions and pathways involving organic acids, any acidic compound containing carbon in covalent linkage.	953	77	2.63e-57	3.88e-54	1
GO_CELLULAR_LIPID_METABOLIC_PROCESS	The chemical reactions and pathways involving lipids, as carried out by individual cells.	913	72	1e-52	1.11e-49	0
GO_OXIDATION_REDUCTION_PROCESS	A metabolic process that results in the removal or addition of one or more electrons to or from a substance, with or without the concomitant removal or addition of a proton or protons.	898	69	1.03e-49	9.17e-47	0
GO_CATABOLIC_PROCESS	The chemical reactions and pathways resulting in the breakdown of substances, including the breakdown of carbon compounds with the liberation of energy for use by the cell or organism.	1773	84	2.2e-44	1.63e-41	2
GO_MONOCARBOXYLIC_ACID_METABOLIC_PROCESS	The chemical reactions and pathways involving monocarboxylic acids, any organic acid containing one carboxyl (COOH) group or anion (COO-).	503	52	6.85e-44	4.34e-41	0
GO_CELLULAR_CATABOLIC_PROCESS	The chemical reactions and pathways resulting in the breakdown of substances, carried out by individual cells.	1322	74	8.87e-44	4.92e-41	2
GO_SINGLE_ORGANISM_CATABOLIC_PROCESS	A catabolic process - chemical reactions and pathways resulting in the breakdown of substances - which involves a single organism.	957	65	1.98e-43	9.75e-41	1
GO_SINGLE_ORGANISM_BIOSYNTHETIC_PROCESS	A biosynthetic process - chemical reactions and pathways resulting in the formation of substances - involving a single organism.	1340	71	2.21e-40	9.82e-38	2
GO_ORGANIC_ACID_CATABOLIC_PROCESS	The chemical reactions and pathways resulting in the breakdown of organic acids, any acidic compound containing carbon in covalent linkage.	205	35	1.62e-37	6.52e-35	0
GO_FATTY_ACID_METABOLIC_PROCESS	The chemical reactions and pathways involving fatty acids, aliphatic monocarboxylic acids liberated from naturally occurring fats and oils by hydrolysis.	296	39	3.71e-37	1.37e-34	0
GO_SMALL_MOLECULE_CATABOLIC_PROCESS	The chemical reactions and pathways resulting in the breakdown of small molecules, any low molecular weight, monomeric, non-encoded molecule.	328	39	2.18e-35	7.43e-33	0
GO_ORGANONITROGEN_COMPOUND_METABOLIC_PROCESS	The chemical reactions and pathways involving organonitrogen compound.	1796	72	3.97e-33	1.26e-30	0
GO_LIPID_CATABOLIC_PROCESS	The chemical reactions and pathways resulting in the breakdown of lipids, compounds soluble in an organic solvent but not, or sparingly, in an aqueous solvent.	247	33	9.08e-32	2.69e-29	0
GO_LIPID_OXIDATION	The removal of one or more electrons from a lipid, with or without the concomitant removal of a proton or protons, by reaction with an electron-accepting substance, by addition of oxygen or by removal of hydrogen.	70	22	1.98e-30	5.5e-28	0
GO_FATTY_ACID_BETA_OXIDATION	A fatty acid oxidation process that results in the complete oxidation of a long-chain fatty acid. Fatty acid beta-oxidation begins with the addition of coenzyme A to a fatty acid, and occurs by successive cycles of reactions during each of which the fatty acid is shortened by a two-carbon fragment removed as acetyl coenzyme A; the cycle continues until only two or three carbons remain (as acetyl-…	51	20	4.43e-30	1.15e-27	0
GO_FATTY_ACID_CATABOLIC_PROCESS	The chemical reactions and pathways resulting in the breakdown of a fatty acid, any of the aliphatic monocarboxylic acids that can be liberated by hydrolysis from naturally occurring fats and oils. Fatty acids are predominantly straight-chain acids of 4 to 24 carbon atoms, which may be saturated or unsaturated; branched fatty acids and hydroxy fatty acids also occur, and very long chain acids of …	73	22	5.81e-30	1.43e-27	0
GO_CELLULAR_LIPID_CATABOLIC_PROCESS	The chemical reactions and pathways resulting in the breakdown of lipids, as carried out by individual cells.	151	27	9.69e-30	2.26e-27	0
GO_LIPID_BIOSYNTHETIC_PROCESS	The chemical reactions and pathways resulting in the formation of lipids, compounds soluble in an organic solvent but not, or sparingly, in an aqueous solvent.	539	41	2.43e-29	5.39e-27	0
GO_ORGANIC_HYDROXY_COMPOUND_METABOLIC_PROCESS	The chemical reactions and pathways involving organic hydroxy compound.	482	39	5.99e-29	1.27e-26	0
GO_MONOCARBOXYLIC_ACID_CATABOLIC_PROCESS	The chemical reactions and pathways resulting in the breakdown of monocarboxylic acids, any organic acid containing one carboxyl (-COOH) group.	96	23	1.13e-28	2.28e-26	0
GO_SMALL_MOLECULE_BIOSYNTHETIC_PROCESS	The chemical reactions and pathways resulting in the formation of small molecules, any low molecular weight, monomeric, non-encoded molecule.	443	37	5.37e-28	1.04e-25	0
GO_ALCOHOL_METABOLIC_PROCESS	The chemical reactions and pathways involving alcohols, any of a class of compounds containing one or more hydroxyl groups attached to a saturated carbon atom.	348	30	2.8e-23	5.18e-21	0
GO_LIPID_MODIFICATION	The covalent alteration of one or more fatty acids in a lipid, resulting in a change in the properties of the lipid.	210	25	4.71e-23	8.36e-21	0
GO_STEROID_METABOLIC_PROCESS	The chemical reactions and pathways involving steroids, compounds with a 1,2,cyclopentanoperhydrophenanthrene nucleus.	237	25	9.72e-22	1.66e-19	0
GO_COFACTOR_METABOLIC_PROCESS	The chemical reactions and pathways involving a cofactor, a substance that is required for the activity of an enzyme or other protein. Cofactors may be inorganic, such as the metal atoms zinc, iron, and copper in certain forms, or organic, in which case they are referred to as coenzymes. Cofactors may either be bound tightly to active sites or bind loosely with the substrate.	334	28	1.8e-21	2.96e-19	0
GO_SULFUR_COMPOUND_METABOLIC_PROCESS	The chemical reactions and pathways involving the nonmetallic element sulfur or compounds that contain sulfur, such as the amino acids methionine and cysteine or the tripeptide glutathione.	359	28	1.26e-20	2e-18	0
GO_COENZYME_METABOLIC_PROCESS	The chemical reactions and pathways involving coenzymes, any of various nonprotein organic cofactors that are required, in addition to an enzyme and a substrate, for an enzymatic reaction to proceed.	265	25	1.53e-20	2.34e-18	0
GO_ORGANIC_ANION_TRANSPORT	The directed movement of organic anions into, out of or within a cell, or between cells, by means of some agent such as a transporter or pore. Organic anions are atoms or small molecules with a negative charge which contain carbon in covalent linkage.	387	28	9.36e-20	1.38e-17	0

## Sheet: GO-BP_detail
Gene Set Name	Gene Id	Gene Symbol	Description	Fold Change	ANOVA p-value
GO_SMALL_MOLECULE_METABOLIC_PROCESS	38	ACAT1	acetyl-CoA acetyltransferase 1	1.77339	0.000855305
GO_SMALL_MOLECULE_METABOLIC_PROCESS	122970	ACOT4	acyl-CoA thioesterase 4	3.38432	0.00368984
GO_SMALL_MOLECULE_METABOLIC_PROCESS	1376	CPT2	carnitine palmitoyltransferase 2	2.1735	0.00144014
GO_SMALL_MOLECULE_METABOLIC_PROCESS	2710	GK	glycerol kinase	1.6816	0.0019605
GO_SMALL_MOLECULE_METABOLIC_PROCESS	55350	VNN3	vanin 3	1.81445	0.000890907
GO_SMALL_MOLECULE_METABOLIC_PROCESS	3988	LIPA	lipase A, lysosomal acid, cholesterol esterase	1.61684	0.00596293
GO_SMALL_MOLECULE_METABOLIC_PROCESS	3931	LCAT	lecithin-cholesterol acyltransferase	1.64584	0.0152627
GO_SMALL_MOLECULE_METABOLIC_PROCESS	3034	HAL	histidine ammonia-lyase	1.89235	0.0132952
GO_SMALL_MOLECULE_METABOLIC_PROCESS	224	ALDH3A2	aldehyde dehydrogenase 3 family, member A2	3.5243	0.00086725
GO_SMALL_MOLECULE_METABOLIC_PROCESS	4311	MME	membrane metallo-endopeptidase	3.49531	0.000484026
GO_SMALL_MOLECULE_METABOLIC_PROCESS	51141	INSIG2	insulin induced gene 2	4.51312	0.000275459
GO_SMALL_MOLECULE_METABOLIC_PROCESS	79799	UGT2A3	UDP glucuronosyltransferase 2 family, polypeptide A3	1.76358	0.0229191
GO_SMALL_MOLECULE_METABOLIC_PROCESS	1576	CYP3A4	cytochrome P450, family 3, subfamily A, polypeptide 4	2.18741	0.000111938
GO_SMALL_MOLECULE_METABOLIC_PROCESS	3312	HSPA8	heat shock 70kDa protein 8	1.5283	0.00463497
GO_SMALL_MOLECULE_METABOLIC_PROCESS	2745	GLRX	glutaredoxin (thioltransferase)	2.03647	0.00779883
GO_SMALL_MOLECULE_METABOLIC_PROCESS	4524	MTHFR	methylenetetrahydrofolate reductase (NAD(P)H)	1.66844	0.0183477
GO_SMALL_MOLECULE_METABOLIC_PROCESS	2820	GPD2	glycerol-3-phosphate dehydrogenase 2 (mitochondrial)	1.58725	0.0356215
GO_SMALL_MOLECULE_METABOLIC_PROCESS	4329	ALDH6A1	aldehyde dehydrogenase 6 family, member A1	1.55718	0.0130025
GO_SMALL_MOLECULE_METABOLIC_PROCESS	8424	BBOX1	butyrobetaine (gamma), 2-oxoglutarate dioxygenase (gamma-butyrobetaine hydroxylase) 1	1.59043	0.00889699
GO_SMALL_MOLECULE_METABOLIC_PROCESS	2053	EPHX2	epoxide hydrolase 2, cytoplasmic	2.12978	0.000393204
GO_SMALL_MOLECULE_METABOLIC_PROCESS	1491	CTH	cystathionase (cystathionine gamma-lyase)	1.64867	0.00943928
GO_SMALL_MOLECULE_METABOLIC_PROCESS	2224	FDPS	farnesyl diphosphate synthase	-2.6974	0.00172661
GO_SMALL_MOLECULE_METABOLIC_PROCESS	1119	CHKA	choline kinase alpha	2.68308	0.00340228
GO_SMALL_MOLECULE_METABOLIC_PROCESS	3953	LEPR	leptin receptor	1.63649	0.00281941
GO_SMALL_MOLECULE_METABOLIC_PROCESS	641371	ACOT1	acyl-CoA thioesterase 1	9.21084	0.000784115
GO_SMALL_MOLECULE_METABOLIC_PROCESS	873	CBR1	carbonyl reductase 1	1.60544	0.00024507
GO_SMALL_MOLECULE_METABOLIC_PROCESS	1962	EHHADH	enoyl-CoA, hydratase/3-hydroxyacyl CoA dehydrogenase	9.64907	0.000126974
GO_SMALL_MOLECULE_METABOLIC_PROCESS	2180	ACSL1	acyl-CoA synthetase long-chain family member 1	3.24665	0.00047773
GO_SMALL_MOLECULE_METABOLIC_PROCESS	6999	TDO2	tryptophan 2,3-dioxygenase	1.54417	0.00989422
GO_SMALL_MOLECULE_METABOLIC_PROCESS	51166	AADAT	aminoadipate aminotransferase	1.53724	0.0176972
GO_SMALL_MOLECULE_METABOLIC_PROCESS	7363	UGT2B4	UDP glucuronosyltransferase 2 family, polypeptide B4	1.69942	0.0412316
GO_SMALL_MOLECULE_METABOLIC_PROCESS	51703	ACSL5	acyl-CoA synthetase long-chain family member 5	1.6176	0.000648662
GO_SMALL_MOLECULE_METABOLIC_PROCESS	1582	CYP8B1	cytochrome P450, family 8, subfamily B, polypeptide 1	3.55399	0.00785468
GO_SMALL_MOLECULE_METABOLIC_PROCESS	4715	NDUFB9	NADH dehydrogenase (ubiquinone) 1 beta subcomplex, 9, 22kDa	1.63818	0.0326675
GO_SMALL_MOLECULE_METABOLIC_PROCESS	8660	IRS2	insulin receptor substrate 2	1.76076	0.0410914
GO_SMALL_MOLECULE_METABOLIC_PROCESS	5166	PDK4	pyruvate dehydrogenase kinase, isozyme 4	4.66084	0.00209195
GO_SMALL_MOLECULE_METABOLIC_PROCESS	60481	ELOVL5	ELOVL fatty acid elongase 5	2.31279	0.00910325
GO_SMALL_MOLECULE_METABOLIC_PROCESS	1375	CPT1B	carnitine palmitoyltransferase 1B (muscle)	1.50418	0.0301416
GO_SMALL_MOLECULE_METABOLIC_PROCESS	4696	NDUFA3	NADH dehydrogenase (ubiquinone) 1 alpha subcomplex, 3, 9kDa	1.53457	0.0134308
GO_SMALL_MOLECULE_METABOLIC_PROCESS	2326	FMO1	flavin containing monooxygenase 1	1.84427	0.000408961
GO_SMALL_MOLECULE_METABOLIC_PROCESS	1666	DECR1	2,4-dienoyl CoA reductase 1, mitochondrial	1.7845	0.000543546
GO_SMALL_MOLECULE_METABOLIC_PROCESS	1050	CEBPA	CCAAT/enhancer binding protein (C/EBP), alpha	-1.51687	0.0147935
GO_SMALL_MOLECULE_METABOLIC_PROCESS	84129	ACAD11	acyl-CoA dehydrogenase family, member 11	1.67146	0.000646651
GO_SMALL_MOLECULE_METABOLIC_PROCESS	392636	AGMO	alkylglycerol monooxygenase	1.78901	0.00121152
GO_SMALL_MOLECULE_METABOLIC_PROCESS	33	ACADL	acyl-CoA dehydrogenase, long chain	1.72816	0.0028287
GO_SMALL_MOLECULE_METABOLIC_PROCESS	635	BHMT	betaine--homocysteine S-methyltransferase	1.70162	0.0343933
GO_SMALL_MOLECULE_METABOLIC_PROCESS	2731	GLDC	glycine dehydrogenase (decarboxylating)	2.24637	0.000863899
GO_SMALL_MOLECULE_METABOLIC_PROCESS	27329	ANGPTL3	angiopoietin-like 3	1.50328	0.00531285
GO_SMALL_MOLECULE_METABOLIC_PROCESS	50814	NSDHL	NAD(P) dependent steroid dehydrogenase-like	-2.14416	0.00831368
GO_SMALL_MOLECULE_METABOLIC_PROCESS	2110	ETFDH	electron-transferring-flavoprotein dehydrogenase	1.79156	0.00020707
GO_SMALL_MOLECULE_METABOLIC_PROCESS	11343	MGLL	monoglyceride lipase	1.86235	0.00245045
GO_SMALL_MOLECULE_METABOLIC_PROCESS	10455	ECI2	enoyl-CoA delta isomerase 2	1.74498	0.00178871
GO_SMALL_MOLECULE_METABOLIC_PROCESS	54884	RETSAT	retinol saturase (all-trans-retinol 13,14-reductase)	4.89906	9.08576e-05
GO_SMALL_MOLECULE_METABOLIC_PROCESS	6296	ACSM3	acyl-CoA synthetase medium-chain family member 3	1.55279	0.0151525
GO_SMALL_MOLECULE_METABOLIC_PROCESS	83401	ELOVL3	ELOVL fatty acid elongase 3	6.40236	0.00054127
GO_SMALL_MOLECULE_METABOLIC_PROCESS	3032	HADHB	hydroxyacyl-CoA dehydrogenase/3-ketoacyl-CoA thiolase/enoyl-CoA hydratase (trifunctional protein), beta subunit	1.92885	0.000229025
GO_SMALL_MOLECULE_METABOLIC_PROCESS	6391	SDHC	succinate dehydrogenase complex, subunit C, integral membrane protein, 15kDa	1.62795	0.00613126
GO_SMALL_MOLECULE_METABOLIC_PROCESS	1890	TYMP	thymidine phosphorylase	2.07655	0.0062045
GO_SMALL_MOLECULE_METABOLIC_PROCESS	761	CA3	carbonic anhydrase III, muscle specific	2.60538	0.00219411
GO_SMALL_MOLECULE_METABOLIC_PROCESS	2171	FABP5	fatty acid binding protein 5 (psoriasis-associated)	-1.73529	0.00148123
GO_SMALL_MOLECULE_METABOLIC_PROCESS	51302	CYP39A1	cytochrome P450, family 39, subfamily A, polypeptide 1	2.42464	0.00251403
GO_SMALL_MOLECULE_METABOLIC_PROCESS	2984	GUCY2C	guanylate cyclase 2C (heat stable enterotoxin receptor)	-1.67592	0.0313742
GO_SMALL_MOLECULE_METABOLIC_PROCESS	5825	ABCD3	ATP-binding cassette, sub-family D (ALD), member 3	1.6066	0.00182228
GO_SMALL_MOLECULE_METABOLIC_PROCESS	847	CAT	catalase	1.60446	0.00171348
GO_SMALL_MOLECULE_METABOLIC_PROCESS	972	CD74	CD74 molecule, major histocompatibility complex, class II invariant chain	2.00907	0.00446325
GO_SMALL_MOLECULE_METABOLIC_PROCESS	590	BCHE	butyrylcholinesterase	1.63658	0.000631726
GO_SMALL_MOLECULE_METABOLIC_PROCESS	1407	CRY1	cryptochrome 1 (photolyase-like)	2.34398	0.00040721
GO_SMALL_MOLECULE_METABOLIC_PROCESS	9429	ABCG2	ATP-binding cassette, sub-family G (WHITE), member 2	1.80371	0.00152641
GO_SMALL_MOLECULE_METABOLIC_PROCESS	3030	HADHA	hydroxyacyl-CoA dehydrogenase/3-ketoacyl-CoA thiolase/enoyl-CoA hydratase (trifunctional protein), alpha subunit	1.54394	0.000306471
GO_SMALL_MOLECULE_METABOLIC_PROCESS	51380	CSAD	cysteine sulfinic acid decarboxylase	1.73646	0.0117777
GO_SMALL_MOLECULE_METABOLIC_PROCESS	6713	SQLE	squalene epoxidase	-2.98702	0.00195107
GO_SMALL_MOLECULE_METABOLIC_PROCESS	34	ACADM	acyl-CoA dehydrogenase, C-4 to C-12 straight chain	1.99474	0.000454357
GO_SMALL_MOLECULE_METABOLIC_PROCESS	4969	OGN	osteoglycin	1.73328	0.024935
GO_SMALL_MOLECULE_METABOLIC_PROCESS	5444	PON1	paraoxonase 1	1.51404	0.00152714
GO_SMALL_MOLECULE_METABOLIC_PROCESS	2729	GCLC	glutamate-cysteine ligase, catalytic subunit	1.91732	0.0112782
GO_SMALL_MOLECULE_METABOLIC_PROCESS	3295	HSD17B4	hydroxysteroid (17-beta) dehydrogenase 4	1.58035	0.000403005
GO_SMALL_MOLECULE_METABOLIC_PROCESS	1384	CRAT	carnitine O-acetyltransferase	2.85378	0.00285356
GO_SMALL_MOLECULE_METABOLIC_PROCESS	435	ASL	argininosuccinate lyase	1.53763	0.0277105
GO_SMALL_MOLECULE_METABOLIC_PROCESS	26061	HACL1	2-hydroxyacyl-CoA lyase 1	2.10651	0.000775308
GO_SMALL_MOLECULE_METABOLIC_PROCESS	51	ACOX1	acyl-CoA oxidase 1, palmitoyl	1.66627	0.00242207
GO_SMALL_MOLECULE_METABOLIC_PROCESS	3033	HADH	hydroxyacyl-CoA dehydrogenase	1.52063	0.000393585
GO_SMALL_MOLECULE_METABOLIC_PROCESS	8876	VNN1	vanin 1	3.1305	0.000774131
GO_SMALL_MOLECULE_METABOLIC_PROCESS	283927	NUDT7	nudix (nucleoside diphosphate linked moiety X)-type motif 7	-2.17292	0.0458252
GO_SMALL_MOLECULE_METABOLIC_PROCESS	2531	KDSR	3-ketodihydrosphingosine reductase	1.50092	0.00438066
GO_SMALL_MOLECULE_METABOLIC_PROCESS	25953	PNKD	paroxysmal nonkinesigenic dyskinesia	1.52536	0.00310289
GO_SMALL_MOLECULE_METABOLIC_PROCESS	53354	PANK1	pantothenate kinase 1	1.50012	0.00261402
GO_SMALL_MOLECULE_METABOLIC_PROCESS	134526	ACOT12	acyl-CoA thioesterase 12	1.89251	0.0005775
GO_SMALL_MOLECULE_METABOLIC_PROCESS	2356	FPGS	folylpolyglutamate synthase	1.56811	0.000276656
GO_SMALL_MOLECULE_METABOLIC_PROCESS	6566	SLC16A1	solute carrier family 16, member 1 (monocarboxylic acid transporter 1)	2.16833	0.0025293
GO_SMALL_MOLECULE_METABOLIC_PROCESS	9446	GSTO1	glutathione S-transferase omega 1	1.52302	0.00912031
GO_SMALL_MOLECULE_METABOLIC_PROCESS	1807	DPYS	dihydropyrimidinase	1.53281	0.00564242
GO_SMALL_MOLECULE_METABOLIC_PROCESS	1595	CYP51A1	cytochrome P450, family 51, subfamily A, polypeptide 1	-2.46406	0.00328032
GO_SMALL_MOLECULE_METABOLIC_PROCESS	3156	HMGCR	3-hydroxy-3-methylglutaryl-CoA reductase	-1.61115	0.0191748
GO_SMALL_MOLECULE_METABOLIC_PROCESS	26063	DECR2	2,4-dienoyl CoA reductase 2, peroxisomal	1.90336	0.004052
GO_SMALL_MOLECULE_METABOLIC_PROCESS	54677	CROT	carnitine O-octanoyltransferase	1.87563	0.000840794
GO_SMALL_MOLECULE_METABOLIC_PROCESS	3158	HMGCS2	3-hydroxy-3-methylglutaryl-CoA synthase 2 (mitochondrial)	1.69489	0.00079222
GO_SMALL_MOLECULE_METABOLIC_PROCESS	10400	PEMT	phosphatidylethanolamine N-methyltransferase	1.51585	0.0193472
GO_SMALL_MOLECULE_METABOLIC_PROCESS	3422	IDI1	isopentenyl-diphosphate delta isomerase 1	-3.14131	0.000814091
GO_SMALL_MOLECULE_METABOLIC_PROCESS	133688	UGT3A1	UDP glycosyltransferase 3 family, polypeptide A1	1.59242	0.000962368
GO_SMALL_MOLECULE_METABOLIC_PROCESS	125061	AFMID	arylformamidase	2.05169	0.00261766
GO_SMALL_MOLECULE_METABOLIC_PROCESS	225	ABCD2	ATP-binding cassette, sub-family D (ALD), member 2	1.80682	0.0319243
GO_SMALL_MOLECULE_METABOLIC_PROCESS	283459	GATC	glutamyl-tRNA(Gln) amidotransferase, subunit C homolog (bacterial)	1.57923	0.00814744
GO_SMALL_MOLECULE_METABOLIC_PROCESS	10901	DHRS4	dehydrogenase/reductase (SDR family) member 4	1.58677	0.00312422
GO_SMALL_MOLECULE_METABOLIC_PROCESS	4199	ME1	malic enzyme 1, NADP(+)-dependent, cytosolic	1.98158	0.0424975
GO_SMALL_MOLECULE_METABOLIC_PROCESS	1632	ECI1	enoyl-CoA delta isomerase 1	1.7211	0.00210442
GO_SMALL_MOLECULE_METABOLIC_PROCESS	1718	DHCR24	24-dehydrocholesterol reductase	-1.58136	0.0182725
GO_SMALL_MOLECULE_METABOLIC_PROCESS	51477	ISYNA1	inositol-3-phosphate synthase 1	-2.42543	0.00551362
GO_SMALL_MOLECULE_METABOLIC_PROCESS	6584	SLC22A5	solute carrier family 22 (organic cation/carnitine transporter), member 5	2.19767	0.00263368
GO_SMALL_MOLECULE_METABOLIC_PROCESS	6821	SUOX	sulfite oxidase	1.57706	0.00517778
GO_SMALL_MOLECULE_METABOLIC_PROCESS	23576	DDAH1	dimethylarginine dimethylaminohydrolase 1	2.68367	0.011911
GO_SMALL_MOLECULE_METABOLIC_PROCESS	1891	ECH1	enoyl CoA hydratase 1, peroxisomal	1.6658	0.00260057
GO_SMALL_MOLECULE_METABOLIC_PROCESS	4953	ODC1	ornithine decarboxylase 1	1.62416	0.00584339
GO_SMALL_MOLECULE_METABOLIC_PROCESS	10965	ACOT2	acyl-CoA thioesterase 2	4.63269	0.0062207
GO_LIPID_METABOLIC_PROCESS	3290	HSD11B1	hydroxysteroid (11-beta) dehydrogenase 1	1.5875	0.00360464
GO_LIPID_METABOLIC_PROCESS	1891	ECH1	enoyl CoA hydratase 1, peroxisomal	1.6658	0.00260057
GO_LIPID_METABOLIC_PROCESS	79087	ALG12	asparagine-linked glycosylation 12, alpha-1,6-mannosyltransferase homolog (S. cerevisiae)	1.55588	0.0161877
GO_LIPID_METABOLIC_PROCESS	10965	ACOT2	acyl-CoA thioesterase 2	4.63269	0.0062207
GO_LIPID_METABOLIC_PROCESS	10901	DHRS4	dehydrogenase/reductase (SDR family) member 4	1.58677	0.00312422
GO_LIPID_METABOLIC_PROCESS	1718	DHCR24	24-dehydrocholesterol reductase	-1.58136	0.0182725
GO_LIPID_METABOLIC_PROCESS	1632	ECI1	enoyl-CoA delta isomerase 1	1.7211	0.00210442
GO_LIPID_METABOLIC_PROCESS	51477	ISYNA1	inositol-3-phosphate synthase 1	-2.42543	0.00551362
GO_LIPID_METABOLIC_PROCESS	225	ABCD2	ATP-binding cassette, sub-family D (ALD), member 2	1.80682	0.0319243
GO_LIPID_METABOLIC_PROCESS	3422	IDI1	isopentenyl-diphosphate delta isomerase 1	-3.14131	0.000814091
GO_LIPID_METABOLIC_PROCESS	10400	PEMT	phosphatidylethanolamine N-methyltransferase	1.51585	0.0193472
GO_LIPID_METABOLIC_PROCESS	3158	HMGCS2	3-hydroxy-3-methylglutaryl-CoA synthase 2 (mitochondrial)	1.69489	0.00079222
GO_LIPID_METABOLIC_PROCESS	283	ANG	angiogenin, ribonuclease, RNase A family, 5	-2.27736	0.0190897
GO_LIPID_METABOLIC_PROCESS	54677	CROT	carnitine O-octanoyltransferase	1.87563	0.000840794
GO_LIPID_METABOLIC_PROCESS	26063	DECR2	2,4-dienoyl CoA reductase 2, peroxisomal	1.90336	0.004052
GO_LIPID_METABOLIC_PROCESS	10555	AGPAT2	1-acylglycerol-3-phosphate O-acyltransferase 2 (lysophosphatidic acid acyltransferase, beta)	1.89944	0.00515849
GO_LIPID_METABOLIC_PROCESS	1595	CYP51A1	cytochrome P450, family 51, subfamily A, polypeptide 1	-2.46406	0.00328032
GO_LIPID_METABOLIC_PROCESS	3156	HMGCR	3-hydroxy-3-methylglutaryl-CoA reductase	-1.61115	0.0191748
GO_LIPID_METABOLIC_PROCESS	134526	ACOT12	acyl-CoA thioesterase 12	1.89251	0.0005775
GO_LIPID_METABOLIC_PROCESS	8869	ST3GAL5	ST3 beta-galactoside alpha-2,3-sialyltransferase 5	2.04168	0.000344308
GO_LIPID_METABOLIC_PROCESS	6566	SLC16A1	solute carrier family 16, member 1 (monocarboxylic acid transporter 1)	2.16833	0.0025293
GO_LIPID_METABOLIC_PROCESS	2531	KDSR	3-ketodihydrosphingosine reductase	1.50092	0.00438066
GO_LIPID_METABOLIC_PROCESS	283927	NUDT7	nudix (nucleoside diphosphate linked moiety X)-type motif 7	-2.17292	0.0458252
GO_LIPID_METABOLIC_PROCESS	3033	HADH	hydroxyacyl-CoA dehydrogenase	1.52063	0.000393585
GO_LIPID_METABOLIC_PROCESS	161247	FITM1	fat storage-inducing transmembrane protein 1	1.84418	0.00727275
GO_LIPID_METABOLIC_PROCESS	1384	CRAT	carnitine O-acetyltransferase	2.85378	0.00285356
GO_LIPID_METABOLIC_PROCESS	57406	ABHD6	abhydrolase domain containing 6	2.36925	0.00436045
GO_LIPID_METABOLIC_PROCESS	51	ACOX1	acyl-CoA oxidase 1, palmitoyl	1.66627	0.00242207
GO_LIPID_METABOLIC_PROCESS	23259	DDHD2	DDHD domain containing 2	1.6491	0.0163086
GO_LIPID_METABOLIC_PROCESS	26061	HACL1	2-hydroxyacyl-CoA lyase 1	2.10651	0.000775308
GO_LIPID_METABOLIC_PROCESS	3295	HSD17B4	hydroxysteroid (17-beta) dehydrogenase 4	1.58035	0.000403005
GO_LIPID_METABOLIC_PROCESS	128486	FITM2	fat storage-inducing transmembrane protein 2	1.79922	0.00138607
GO_LIPID_METABOLIC_PROCESS	5444	PON1	paraoxonase 1	1.51404	0.00152714
GO_LIPID_METABOLIC_PROCESS	8856	NR1I2	nuclear receptor subfamily 1, group I, member 2	1.57155	0.00343849
GO_LIPID_METABOLIC_PROCESS	34	ACADM	acyl-CoA dehydrogenase, C-4 to C-12 straight chain	1.99474	0.000454357
GO_LIPID_METABOLIC_PROCESS	6713	SQLE	squalene epoxidase	-2.98702	0.00195107
GO_LIPID_METABOLIC_PROCESS	972	CD74	CD74 molecule, major histocompatibility complex, class II invariant chain	2.00907	0.00446325
GO_LIPID_METABOLIC_PROCESS	847	CAT	catalase	1.60446	0.00171348
GO_LIPID_METABOLIC_PROCESS	3030	HADHA	hydroxyacyl-CoA dehydrogenase/3-ketoacyl-CoA thiolase/enoyl-CoA hydratase (trifunctional protein), alpha subunit	1.54394	0.000306471
GO_LIPID_METABOLIC_PROCESS	10955	SERINC3	serine incorporator 3	1.76767	0.0036202
GO_LIPID_METABOLIC_PROCESS	128869	PIGU	phosphatidylinositol glycan anchor biosynthesis, class U	1.72966	0.00213706
GO_LIPID_METABOLIC_PROCESS	5244	ABCB4	ATP-binding cassette, sub-family B (MDR/TAP), member 4	1.52019	0.0043556
GO_LIPID_METABOLIC_PROCESS	5825	ABCD3	ATP-binding cassette, sub-family D (ALD), member 3	1.6066	0.00182228
GO_LIPID_METABOLIC_PROCESS	51302	CYP39A1	cytochrome P450, family 39, subfamily A, polypeptide 1	2.42464	0.00251403
GO_LIPID_METABOLIC_PROCESS	2171	FABP5	fatty acid binding protein 5 (psoriasis-associated)	-1.73529	0.00148123
GO_LIPID_METABOLIC_PROCESS	948	CD36	CD36 molecule (thrombospondin receptor)	2.56785	0.00632914
GO_LIPID_METABOLIC_PROCESS	7069	THRSP	thyroid hormone responsive	-1.6027	0.0223333
GO_LIPID_METABOLIC_PROCESS	6296	ACSM3	acyl-CoA synthetase medium-chain family member 3	1.55279	0.0151525
GO_LIPID_METABOLIC_PROCESS	54884	RETSAT	retinol saturase (all-trans-retinol 13,14-reductase)	4.89906	9.08576e-05
GO_LIPID_METABOLIC_PROCESS	3032	HADHB	hydroxyacyl-CoA dehydrogenase/3-ketoacyl-CoA thiolase/enoyl-CoA hydratase (trifunctional protein), beta subunit	1.92885	0.000229025
GO_LIPID_METABOLIC_PROCESS	83401	ELOVL3	ELOVL fatty acid elongase 3	6.40236	0.00054127
GO_LIPID_METABOLIC_PROCESS	2110	ETFDH	electron-transferring-flavoprotein dehydrogenase	1.79156	0.00020707
GO_LIPID_METABOLIC_PROCESS	11343	MGLL	monoglyceride lipase	1.86235	0.00245045
GO_LIPID_METABOLIC_PROCESS	50814	NSDHL	NAD(P) dependent steroid dehydrogenase-like	-2.14416	0.00831368
GO_LIPID_METABOLIC_PROCESS	347735	SERINC2	serine incorporator 2	1.50214	0.0111738
GO_LIPID_METABOLIC_PROCESS	10195	ALG3	asparagine-linked glycosylation 3, alpha-1,3- mannosyltransferase homolog (S. cerevisiae)	1.6181	0.0213585
GO_LIPID_METABOLIC_PROCESS	10455	ECI2	enoyl-CoA delta isomerase 2	1.74498	0.00178871
GO_LIPID_METABOLIC_PROCESS	33	ACADL	acyl-CoA dehydrogenase, long chain	1.72816	0.0028287
GO_LIPID_METABOLIC_PROCESS	392636	AGMO	alkylglycerol monooxygenase	1.78901	0.00121152
GO_LIPID_METABOLIC_PROCESS	84129	ACAD11	acyl-CoA dehydrogenase family, member 11	1.67146	0.000646651
GO_LIPID_METABOLIC_PROCESS	27329	ANGPTL3	angiopoietin-like 3	1.50328	0.00531285
GO_LIPID_METABOLIC_PROCESS	60481	ELOVL5	ELOVL fatty acid elongase 5	2.31279	0.00910325
GO_LIPID_METABOLIC_PROCESS	1375	CPT1B	carnitine palmitoyltransferase 1B (muscle)	1.50418	0.0301416
GO_LIPID_METABOLIC_PROCESS	1050	CEBPA	CCAAT/enhancer binding protein (C/EBP), alpha	-1.51687	0.0147935
GO_LIPID_METABOLIC_PROCESS	1666	DECR1	2,4-dienoyl CoA reductase 1, mitochondrial	1.7845	0.000543546
GO_LIPID_METABOLIC_PROCESS	51703	ACSL5	acyl-CoA synthetase long-chain family member 5	1.6176	0.000648662
GO_LIPID_METABOLIC_PROCESS	1582	CYP8B1	cytochrome P450, family 8, subfamily B, polypeptide 1	3.55399	0.00785468
GO_LIPID_METABOLIC_PROCESS	8660	IRS2	insulin receptor substrate 2	1.76076	0.0410914
GO_LIPID_METABOLIC_PROCESS	1962	EHHADH	enoyl-CoA, hydratase/3-hydroxyacyl CoA dehydrogenase	9.64907	0.000126974
GO_LIPID_METABOLIC_PROCESS	7363	UGT2B4	UDP glucuronosyltransferase 2 family, polypeptide B4	1.69942	0.0412316
GO_LIPID_METABOLIC_PROCESS	8608	RDH16	retinol dehydrogenase 16 (all-trans)	1.6667	0.00456152
GO_LIPID_METABOLIC_PROCESS	2180	ACSL1	acyl-CoA synthetase long-chain family member 1	3.24665	0.00047773
GO_LIPID_METABOLIC_PROCESS	1200	TPP1	tripeptidyl peptidase I	1.72256	0.0208322
GO_LIPID_METABOLIC_PROCESS	873	CBR1	carbonyl reductase 1	1.60544	0.00024507
GO_LIPID_METABOLIC_PROCESS	641371	ACOT1	acyl-CoA thioesterase 1	9.21084	0.000784115
GO_LIPID_METABOLIC_PROCESS	57104	PNPLA2	patatin-like phospholipase domain containing 2	1.81129	0.022903
GO_LIPID_METABOLIC_PROCESS	4547	MTTP	microsomal triglyceride transfer protein	1.58083	0.000395105
GO_LIPID_METABOLIC_PROCESS	1119	CHKA	choline kinase alpha	2.68308	0.00340228
GO_LIPID_METABOLIC_PROCESS	3953	LEPR	leptin receptor	1.63649	0.00281941
GO_LIPID_METABOLIC_PROCESS	2224	FDPS	farnesyl diphosphate synthase	-2.6974	0.00172661
GO_LIPID_METABOLIC_PROCESS	2053	EPHX2	epoxide hydrolase 2, cytoplasmic	2.12978	0.000393204
GO_LIPID_METABOLIC_PROCESS	51141	INSIG2	insulin induced gene 2	4.51312	0.000275459
GO_LIPID_METABOLIC_PROCESS	1576	CYP3A4	cytochrome P450, family 3, subfamily A, polypeptide 4	2.18741	0.000111938
GO_LIPID_METABOLIC_PROCESS	51170	HSD17B11	hydroxysteroid (17-beta) dehydrogenase 11	2.21898	0.00142
GO_LIPID_METABOLIC_PROCESS	2820	GPD2	glycerol-3-phosphate dehydrogenase 2 (mitochondrial)	1.58725	0.0356215
GO_LIPID_METABOLIC_PROCESS	3931	LCAT	lecithin-cholesterol acyltransferase	1.64584	0.0152627
GO_LIPID_METABOLIC_PROCESS	224	ALDH3A2	aldehyde dehydrogenase 3 family, member A2	3.5243	0.00086725
GO_LIPID_METABOLIC_PROCESS	3988	LIPA	lipase A, lysosomal acid, cholesterol esterase	1.61684	0.00596293
GO_LIPID_METABOLIC_PROCESS	2710	GK	glycerol kinase	1.6816	0.0019605
GO_LIPID_METABOLIC_PROCESS	1376	CPT2	carnitine palmitoyltransferase 2	2.1735	0.00144014
GO_LIPID_METABOLIC_PROCESS	122970	ACOT4	acyl-CoA thioesterase 4	3.38432	0.00368984
GO_ORGANIC_ACID_METABOLIC_PROCESS	5825	ABCD3	ATP-binding cassette, sub-family D (ALD), member 3	1.6066	0.00182228
GO_ORGANIC_ACID_METABOLIC_PROCESS	9429	ABCG2	ATP-binding cassette, sub-family G (WHITE), member 2	1.80371	0.00152641
GO_ORGANIC_ACID_METABOLIC_PROCESS	3030	HADHA	hydroxyacyl-CoA dehydrogenase/3-ketoacyl-CoA thiolase/enoyl-CoA hydratase (trifunctional protein), alpha subunit	1.54394	0.000306471
GO_ORGANIC_ACID_METABOLIC_PROCESS	972	CD74	CD74 molecule, major histocompatibility complex, class II invariant chain	2.00907	0.00446325
GO_ORGANIC_ACID_METABOLIC_PROCESS	6391	SDHC	succinate dehydrogenase complex, subunit C, integral membrane protein, 15kDa	1.62795	0.00613126
GO_ORGANIC_ACID_METABOLIC_PROCESS	51302	CYP39A1	cytochrome P450, family 39, subfamily A, polypeptide 1	2.42464	0.00251403
GO_ORGANIC_ACID_METABOLIC_PROCESS	10455	ECI2	enoyl-CoA delta isomerase 2	1.74498	0.00178871
GO_ORGANIC_ACID_METABOLIC_PROCESS	11343	MGLL	monoglyceride lipase	1.86235	0.00245045
GO_ORGANIC_ACID_METABOLIC_PROCESS	2110	ETFDH	electron-transferring-flavoprotein dehydrogenase	1.79156	0.00020707
GO_ORGANIC_ACID_METABOLIC_PROCESS	3032	HADHB	hydroxyacyl-CoA dehydrogenase/3-ketoacyl-CoA thiolase/enoyl-CoA hydratase (trifunctional protein), beta subunit	1.92885	0.000229025
GO_ORGANIC_ACID_METABOLIC_PROCESS	83401	ELOVL3	ELOVL fatty acid elongase 3	6.40236	0.00054127
GO_ORGANIC_ACID_METABOLIC_PROCESS	6296	ACSM3	acyl-CoA synthetase medium-chain family member 3	1.55279	0.0151525
GO_ORGANIC_ACID_METABOLIC_PROCESS	1666	DECR1	2,4-dienoyl CoA reductase 1, mitochondrial	1.7845	0.000543546
GO_ORGANIC_ACID_METABOLIC_PROCESS	2326	FMO1	flavin containing monooxygenase 1	1.84427	0.000408961
GO_ORGANIC_ACID_METABOLIC_PROCESS	60481	ELOVL5	ELOVL fatty acid elongase 5	2.31279	0.00910325
GO_ORGANIC_ACID_METABOLIC_PROCESS	1375	CPT1B	carnitine palmitoyltransferase 1B (muscle)	1.50418	0.0301416
GO_ORGANIC_ACID_METABOLIC_PROCESS	2731	GLDC	glycine dehydrogenase (decarboxylating)	2.24637	0.000863899
GO_ORGANIC_ACID_METABOLIC_PROCESS	27329	ANGPTL3	angiopoietin-like 3	1.50328	0.00531285
GO_ORGANIC_ACID_METABOLIC_PROCESS	33	ACADL	acyl-CoA dehydrogenase, long chain	1.72816	0.0028287
GO_ORGANIC_ACID_METABOLIC_PROCESS	635	BHMT	betaine--homocysteine S-methyltransferase	1.70162	0.0343933
GO_ORGANIC_ACID_METABOLIC_PROCESS	392636	AGMO	alkylglycerol monooxygenase	1.78901	0.00121152
GO_ORGANIC_ACID_METABOLIC_PROCESS	84129	ACAD11	acyl-CoA dehydrogenase family, member 11	1.67146	0.000646651
GO_ORGANIC_ACID_METABOLIC_PROCESS	51166	AADAT	aminoadipate aminotransferase	1.53724	0.0176972
GO_ORGANIC_ACID_METABOLIC_PROCESS	7363	UGT2B4	UDP glucuronosyltransferase 2 family, polypeptide B4	1.69942	0.0412316
GO_ORGANIC_ACID_METABOLIC_PROCESS	2180	ACSL1	acyl-CoA synthetase long-chain family member 1	3.24665	0.00047773
GO_ORGANIC_ACID_METABOLIC_PROCESS	6999	TDO2	tryptophan 2,3-dioxygenase	1.54417	0.00989422
GO_ORGANIC_ACID_METABOLIC_PROCESS	1962	EHHADH	enoyl-CoA, hydratase/3-hydroxyacyl CoA dehydrogenase	9.64907	0.000126974
GO_ORGANIC_ACID_METABOLIC_PROCESS	51703	ACSL5	acyl-CoA synthetase long-chain family member 5	1.6176	0.000648662
GO_ORGANIC_ACID_METABOLIC_PROCESS	1582	CYP8B1	cytochrome P450, family 8, subfamily B, polypeptide 1	3.55399	0.00785468
GO_ORGANIC_ACID_METABOLIC_PROCESS	873	CBR1	carbonyl reductase 1	1.60544	0.00024507
GO_ORGANIC_ACID_METABOLIC_PROCESS	641371	ACOT1	acyl-CoA thioesterase 1	9.21084	0.000784115
GO_ORGANIC_ACID_METABOLIC_PROCESS	4524	MTHFR	methylenetetrahydrofolate reductase (NAD(P)H)	1.66844	0.0183477
GO_ORGANIC_ACID_METABOLIC_PROCESS	79799	UGT2A3	UDP glucuronosyltransferase 2 family, polypeptide A3	1.76358	0.0229191
GO_ORGANIC_ACID_METABOLIC_PROCESS	1491	CTH	cystathionase (cystathionine gamma-lyase)	1.64867	0.00943928
GO_ORGANIC_ACID_METABOLIC_PROCESS	2053	EPHX2	epoxide hydrolase 2, cytoplasmic	2.12978	0.000393204
GO_ORGANIC_ACID_METABOLIC_PROCESS	8424	BBOX1	butyrobetaine (gamma), 2-oxoglutarate dioxygenase (gamma-butyrobetaine hydroxylase) 1	1.59043	0.00889699
GO_ORGANIC_ACID_METABOLIC_PROCESS	4329	ALDH6A1	aldehyde dehydrogenase 6 family, member A1	1.55718	0.0130025
GO_ORGANIC_ACID_METABOLIC_PROCESS	1376	CPT2	carnitine palmitoyltransferase 2	2.1735	0.00144014
GO_ORGANIC_ACID_METABOLIC_PROCESS	122970	ACOT4	acyl-CoA thioesterase 4	3.38432	0.00368984
GO_ORGANIC_ACID_METABOLIC_PROCESS	38	ACAT1	acetyl-CoA acetyltransferase 1	1.77339	0.000855305
GO_ORGANIC_ACID_METABOLIC_PROCESS	3034	HAL	histidine ammonia-lyase	1.89235	0.0132952
GO_ORGANIC_ACID_METABOLIC_PROCESS	224	ALDH3A2	aldehyde dehydrogenase 3 family, member A2	3.5243	0.00086725
GO_ORGANIC_ACID_METABOLIC_PROCESS	3988	LIPA	lipase A, lysosomal acid, cholesterol esterase	1.61684	0.00596293
GO_ORGANIC_ACID_METABOLIC_PROCESS	55350	VNN3	vanin 3	1.81445	0.000890907
GO_ORGANIC_ACID_METABOLIC_PROCESS	10965	ACOT2	acyl-CoA thioesterase 2	4.63269	0.0062207
GO_ORGANIC_ACID_METABOLIC_PROCESS	4953	ODC1	ornithine decarboxylase 1	1.62416	0.00584339
GO_ORGANIC_ACID_METABOLIC_PROCESS	1891	ECH1	enoyl CoA hydratase 1, peroxisomal	1.6658	0.00260057
GO_ORGANIC_ACID_METABOLIC_PROCESS	1632	ECI1	enoyl-CoA delta isomerase 1	1.7211	0.00210442
GO_ORGANIC_ACID_METABOLIC_PROCESS	4199	ME1	malic enzyme 1, NADP(+)-dependent, cytosolic	1.98158	0.0424975
GO_ORGANIC_ACID_METABOLIC_PROCESS	23576	DDAH1	dimethylarginine dimethylaminohydrolase 1	2.68367	0.011911
GO_ORGANIC_ACID_METABOLIC_PROCESS	6821	SUOX	sulfite oxidase	1.57706	0.00517778
GO_ORGANIC_ACID_METABOLIC_PROCESS	6584	SLC22A5	solute carrier family 22 (organic cation/carnitine transporter), member 5	2.19767	0.00263368
GO_ORGANIC_ACID_METABOLIC_PROCESS	10400	PEMT	phosphatidylethanolamine N-methyltransferase	1.51585	0.0193472
GO_ORGANIC_ACID_METABOLIC_PROCESS	283459	GATC	glutamyl-tRNA(Gln) amidotransferase, subunit C homolog (bacterial)	1.57923	0.00814744
GO_ORGANIC_ACID_METABOLIC_PROCESS	225	ABCD2	ATP-binding cassette, sub-family D (ALD), member 2	1.80682	0.0319243
GO_ORGANIC_ACID_METABOLIC_PROCESS	133688	UGT3A1	UDP glycosyltransferase 3 family, polypeptide A1	1.59242	0.000962368
GO_ORGANIC_ACID_METABOLIC_PROCESS	125061	AFMID	arylformamidase	2.05169	0.00261766
GO_ORGANIC_ACID_METABOLIC_PROCESS	54677	CROT	carnitine O-octanoyltransferase	1.87563	0.000840794
GO_ORGANIC_ACID_METABOLIC_PROCESS	26063	DECR2	2,4-dienoyl CoA reductase 2, peroxisomal	1.90336	0.004052
GO_ORGANIC_ACID_METABOLIC_PROCESS	6566	SLC16A1	solute carrier family 16, member 1 (monocarboxylic acid transporter 1)	2.16833	0.0025293
GO_ORGANIC_ACID_METABOLIC_PROCESS	9446	GSTO1	glutathione S-transferase omega 1	1.52302	0.00912031
GO_ORGANIC_ACID_METABOLIC_PROCESS	2356	FPGS	folylpolyglutamate synthase	1.56811	0.000276656
GO_ORGANIC_ACID_METABOLIC_PROCESS	134526	ACOT12	acyl-CoA thioesterase 12	1.89251	0.0005775
GO_ORGANIC_ACID_METABOLIC_PROCESS	1807	DPYS	dihydropyrimidinase	1.53281	0.00564242
GO_ORGANIC_ACID_METABOLIC_PROCESS	25953	PNKD	paroxysmal nonkinesigenic dyskinesia	1.52536	0.00310289
GO_ORGANIC_ACID_METABOLIC_PROCESS	3033	HADH	hydroxyacyl-CoA dehydrogenase	1.52063	0.000393585
GO_ORGANIC_ACID_METABOLIC_PROCESS	8876	VNN1	vanin 1	3.1305	0.000774131
GO_ORGANIC_ACID_METABOLIC_PROCESS	3295	HSD17B4	hydroxysteroid (17-beta) dehydrogenase 4	1.58035	0.000403005
GO_ORGANIC_ACID_METABOLIC_PROCESS	2729	GCLC	glutamate-cysteine ligase, catalytic subunit	1.91732	0.0112782
GO_ORGANIC_ACID_METABOLIC_PROCESS	5444	PON1	paraoxonase 1	1.51404	0.00152714
GO_ORGANIC_ACID_METABOLIC_PROCESS	4969	OGN	osteoglycin	1.73328	0.024935
GO_ORGANIC_ACID_METABOLIC_PROCESS	51	ACOX1	acyl-CoA oxidase 1, palmitoyl	1.66627	0.00242207
GO_ORGANIC_ACID_METABOLIC_PROCESS	26061	HACL1	2-hydroxyacyl-CoA lyase 1	2.10651	0.000775308
GO_ORGANIC_ACID_METABOLIC_PROCESS	435	ASL	argininosuccinate lyase	1.53763	0.0277105
GO_ORGANIC_ACID_METABOLIC_PROCESS	1384	CRAT	carnitine O-acetyltransferase	2.85378	0.00285356
GO_ORGANIC_ACID_METABOLIC_PROCESS	51380	CSAD	cysteine sulfinic acid decarboxylase	1.73646	0.0117777
GO_ORGANIC_ACID_METABOLIC_PROCESS	34	ACADM	acyl-CoA dehydrogenase, C-4 to C-12 straight chain	1.99474	0.000454357
GO_CELLULAR_LIPID_METABOLIC_PROCESS	392636	AGMO	alkylglycerol monooxygenase	1.78901	0.00121152
GO_CELLULAR_LIPID_METABOLIC_PROCESS	84129	ACAD11	acyl-CoA dehydrogenase family, member 11	1.67146	0.000646651
GO_CELLULAR_LIPID_METABOLIC_PROCESS	33	ACADL	acyl-CoA dehydrogenase, long chain	1.72816	0.0028287
GO_CELLULAR_LIPID_METABOLIC_PROCESS	27329	ANGPTL3	angiopoietin-like 3	1.50328	0.00531285
GO_CELLULAR_LIPID_METABOLIC_PROCESS	1375	CPT1B	carnitine palmitoyltransferase 1B (muscle)	1.50418	0.0301416
GO_CELLULAR_LIPID_METABOLIC_PROCESS	60481	ELOVL5	ELOVL fatty acid elongase 5	2.31279	0.00910325
GO_CELLULAR_LIPID_METABOLIC_PROCESS	1666	DECR1	2,4-dienoyl CoA reductase 1, mitochondrial	1.7845	0.000543546
GO_CELLULAR_LIPID_METABOLIC_PROCESS	54884	RETSAT	retinol saturase (all-trans-retinol 13,14-reductase)	4.89906	9.08576e-05
GO_CELLULAR_LIPID_METABOLIC_PROCESS	6296	ACSM3	acyl-CoA synthetase medium-chain family member 3	1.55279	0.0151525
GO_CELLULAR_LIPID_METABOLIC_PROCESS	83401	ELOVL3	ELOVL fatty acid elongase 3	6.40236	0.00054127
GO_CELLULAR_LIPID_METABOLIC_PROCESS	3032	HADHB	hydroxyacyl-CoA dehydrogenase/3-ketoacyl-CoA thiolase/enoyl-CoA hydratase (trifunctional protein), beta subunit	1.92885	0.000229025
GO_CELLULAR_LIPID_METABOLIC_PROCESS	11343	MGLL	monoglyceride lipase	1.86235	0.00245045
GO_CELLULAR_LIPID_METABOLIC_PROCESS	2110	ETFDH	electron-transferring-flavoprotein dehydrogenase	1.79156	0.00020707
GO_CELLULAR_LIPID_METABOLIC_PROCESS	10455	ECI2	enoyl-CoA delta isomerase 2	1.74498	0.00178871
GO_CELLULAR_LIPID_METABOLIC_PROCESS	347735	SERINC2	serine incorporator 2	1.50214	0.0111738
GO_CELLULAR_LIPID_METABOLIC_PROCESS	10195	ALG3	asparagine-linked glycosylation 3, alpha-1,3- mannosyltransferase homolog (S. cerevisiae)	1.6181	0.0213585
GO_CELLULAR_LIPID_METABOLIC_PROCESS	2171	FABP5	fatty acid binding protein 5 (psoriasis-associated)	-1.73529	0.00148123
GO_CELLULAR_LIPID_METABOLIC_PROCESS	972	CD74	CD74 molecule, major histocompatibility complex, class II invariant chain	2.00907	0.00446325
GO_CELLULAR_LIPID_METABOLIC_PROCESS	847	CAT	catalase	1.60446	0.00171348
GO_CELLULAR_LIPID_METABOLIC_PROCESS	10955	SERINC3	serine incorporator 3	1.76767	0.0036202
GO_CELLULAR_LIPID_METABOLIC_PROCESS	3030	HADHA	hydroxyacyl-CoA dehydrogenase/3-ketoacyl-CoA thiolase/enoyl-CoA hydratase (trifunctional protein), alpha subunit	1.54394	0.000306471
GO_CELLULAR_LIPID_METABOLIC_PROCESS	128869	PIGU	phosphatidylinositol glycan anchor biosynthesis, class U	1.72966	0.00213706
GO_CELLULAR_LIPID_METABOLIC_PROCESS	5825	ABCD3	ATP-binding cassette, sub-family D (ALD), member 3	1.6066	0.00182228
GO_CELLULAR_LIPID_METABOLIC_PROCESS	2710	GK	glycerol kinase	1.6816	0.0019605
GO_CELLULAR_LIPID_METABOLIC_PROCESS	3988	LIPA	lipase A, lysosomal acid, cholesterol esterase	1.61684	0.00596293
GO_CELLULAR_LIPID_METABOLIC_PROCESS	224	ALDH3A2	aldehyde dehydrogenase 3 family, member A2	3.5243	0.00086725
GO_CELLULAR_LIPID_METABOLIC_PROCESS	3931	LCAT	lecithin-cholesterol acyltransferase	1.64584	0.0152627
GO_CELLULAR_LIPID_METABOLIC_PROCESS	122970	ACOT4	acyl-CoA thioesterase 4	3.38432	0.00368984
GO_CELLULAR_LIPID_METABOLIC_PROCESS	1376	CPT2	carnitine palmitoyltransferase 2	2.1735	0.00144014
GO_CELLULAR_LIPID_METABOLIC_PROCESS	2053	EPHX2	epoxide hydrolase 2, cytoplasmic	2.12978	0.000393204
GO_CELLULAR_LIPID_METABOLIC_PROCESS	51141	INSIG2	insulin induced gene 2	4.51312	0.000275459
GO_CELLULAR_LIPID_METABOLIC_PROCESS	1576	CYP3A4	cytochrome P450, family 3, subfamily A, polypeptide 4	2.18741	0.000111938
GO_CELLULAR_LIPID_METABOLIC_PROCESS	2820	GPD2	glycerol-3-phosphate dehydrogenase 2 (mitochondrial)	1.58725	0.0356215
GO_CELLULAR_LIPID_METABOLIC_PROCESS	641371	ACOT1	acyl-CoA thioesterase 1	9.21084	0.000784115
GO_CELLULAR_LIPID_METABOLIC_PROCESS	873	CBR1	carbonyl reductase 1	1.60544	0.00024507
GO_CELLULAR_LIPID_METABOLIC_PROCESS	57104	PNPLA2	patatin-like phospholipase domain containing 2	1.81129	0.022903
GO_CELLULAR_LIPID_METABOLIC_PROCESS	2224	FDPS	farnesyl diphosphate synthase	-2.6974	0.00172661
GO_CELLULAR_LIPID_METABOLIC_PROCESS	1119	CHKA	choline kinase alpha	2.68308	0.00340228
GO_CELLULAR_LIPID_METABOLIC_PROCESS	51703	ACSL5	acyl-CoA synthetase long-chain family member 5	1.6176	0.000648662
GO_CELLULAR_LIPID_METABOLIC_PROCESS	8660	IRS2	insulin receptor substrate 2	1.76076	0.0410914
GO_CELLULAR_LIPID_METABOLIC_PROCESS	1962	EHHADH	enoyl-CoA, hydratase/3-hydroxyacyl CoA dehydrogenase	9.64907	0.000126974
GO_CELLULAR_LIPID_METABOLIC_PROCESS	2180	ACSL1	acyl-CoA synthetase long-chain family member 1	3.24665	0.00047773
GO_CELLULAR_LIPID_METABOLIC_PROCESS	3158	HMGCS2	3-hydroxy-3-methylglutaryl-CoA synthase 2 (mitochondrial)	1.69489	0.00079222
GO_CELLULAR_LIPID_METABOLIC_PROCESS	283	ANG	angiogenin, ribonuclease, RNase A family, 5	-2.27736	0.0190897
GO_CELLULAR_LIPID_METABOLIC_PROCESS	26063	DECR2	2,4-dienoyl CoA reductase 2, peroxisomal	1.90336	0.004052
GO_CELLULAR_LIPID_METABOLIC_PROCESS	54677	CROT	carnitine O-octanoyltransferase	1.87563	0.000840794
GO_CELLULAR_LIPID_METABOLIC_PROCESS	10555	AGPAT2	1-acylglycerol-3-phosphate O-acyltransferase 2 (lysophosphatidic acid acyltransferase, beta)	1.89944	0.00515849
GO_CELLULAR_LIPID_METABOLIC_PROCESS	225	ABCD2	ATP-binding cassette, sub-family D (ALD), member 2	1.80682	0.0319243
GO_CELLULAR_LIPID_METABOLIC_PROCESS	10400	PEMT	phosphatidylethanolamine N-methyltransferase	1.51585	0.0193472
GO_CELLULAR_LIPID_METABOLIC_PROCESS	3422	IDI1	isopentenyl-diphosphate delta isomerase 1	-3.14131	0.000814091
GO_CELLULAR_LIPID_METABOLIC_PROCESS	10901	DHRS4	dehydrogenase/reductase (SDR family) member 4	1.58677	0.00312422
GO_CELLULAR_LIPID_METABOLIC_PROCESS	1632	ECI1	enoyl-CoA delta isomerase 1	1.7211	0.00210442
GO_CELLULAR_LIPID_METABOLIC_PROCESS	51477	ISYNA1	inositol-3-phosphate synthase 1	-2.42543	0.00551362
GO_CELLULAR_LIPID_METABOLIC_PROCESS	79087	ALG12	asparagine-linked glycosylation 12, alpha-1,6-mannosyltransferase homolog (S. cerevisiae)	1.55588	0.0161877
GO_CELLULAR_LIPID_METABOLIC_PROCESS	1891	ECH1	enoyl CoA hydratase 1, peroxisomal	1.6658	0.00260057
GO_CELLULAR_LIPID_METABOLIC_PROCESS	10965	ACOT2	acyl-CoA thioesterase 2	4.63269	0.0062207
GO_CELLULAR_LIPID_METABOLIC_PROCESS	34	ACADM	acyl-CoA dehydrogenase, C-4 to C-12 straight chain	1.99474	0.000454357
GO_CELLULAR_LIPID_METABOLIC_PROCESS	1384	CRAT	carnitine O-acetyltransferase	2.85378	0.00285356
GO_CELLULAR_LIPID_METABOLIC_PROCESS	161247	FITM1	fat storage-inducing transmembrane protein 1	1.84418	0.00727275
GO_CELLULAR_LIPID_METABOLIC_PROCESS	26061	HACL1	2-hydroxyacyl-CoA lyase 1	2.10651	0.000775308
GO_CELLULAR_LIPID_METABOLIC_PROCESS	23259	DDHD2	DDHD domain containing 2	1.6491	0.0163086
GO_CELLULAR_LIPID_METABOLIC_PROCESS	51	ACOX1	acyl-CoA oxidase 1, palmitoyl	1.66627	0.00242207
GO_CELLULAR_LIPID_METABOLIC_PROCESS	57406	ABHD6	abhydrolase domain containing 6	2.36925	0.00436045
GO_CELLULAR_LIPID_METABOLIC_PROCESS	5444	PON1	paraoxonase 1	1.51404	0.00152714
GO_CELLULAR_LIPID_METABOLIC_PROCESS	128486	FITM2	fat storage-inducing transmembrane protein 2	1.79922	0.00138607
GO_CELLULAR_LIPID_METABOLIC_PROCESS	3295	HSD17B4	hydroxysteroid (17-beta) dehydrogenase 4	1.58035	0.000403005
GO_CELLULAR_LIPID_METABOLIC_PROCESS	283927	NUDT7	nudix (nucleoside diphosphate linked moiety X)-type motif 7	-2.17292	0.0458252
GO_CELLULAR_LIPID_METABOLIC_PROCESS	3033	HADH	hydroxyacyl-CoA dehydrogenase	1.52063	0.000393585
GO_CELLULAR_LIPID_METABOLIC_PROCESS	2531	KDSR	3-ketodihydrosphingosine reductase	1.50092	0.00438066
GO_CELLULAR_LIPID_METABOLIC_PROCESS	3156	HMGCR	3-hydroxy-3-methylglutaryl-CoA reductase	-1.61115	0.0191748
GO_CELLULAR_LIPID_METABOLIC_PROCESS	8869	ST3GAL5	ST3 beta-galactoside alpha-2,3-sialyltransferase 5	2.04168	0.000344308
GO_CELLULAR_LIPID_METABOLIC_PROCESS	134526	ACOT12	acyl-CoA thioesterase 12	1.89251	0.0005775
GO_OXIDATION_REDUCTION_PROCESS	1666	DECR1	2,4-dienoyl CoA reductase 1, mitochondrial	1.7845	0.000543546
GO_OXIDATION_REDUCTION_PROCESS	1375	CPT1B	carnitine palmitoyltransferase 1B (muscle)	1.50418	0.0301416
GO_OXIDATION_REDUCTION_PROCESS	4696	NDUFA3	NADH dehydrogenase (ubiquinone) 1 alpha subcomplex, 3, 9kDa	1.53457	0.0134308
GO_OXIDATION_REDUCTION_PROCESS	2326	FMO1	flavin containing monooxygenase 1	1.84427	0.000408961
GO_OXIDATION_REDUCTION_PROCESS	2731	GLDC	glycine dehydrogenase (decarboxylating)	2.24637	0.000863899
GO_OXIDATION_REDUCTION_PROCESS	33	ACADL	acyl-CoA dehydrogenase, long chain	1.72816	0.0028287
GO_OXIDATION_REDUCTION_PROCESS	392636	AGMO	alkylglycerol monooxygenase	1.78901	0.00121152
GO_OXIDATION_REDUCTION_PROCESS	84129	ACAD11	acyl-CoA dehydrogenase family, member 11	1.67146	0.000646651
GO_OXIDATION_REDUCTION_PROCESS	10455	ECI2	enoyl-CoA delta isomerase 2	1.74498	0.00178871
GO_OXIDATION_REDUCTION_PROCESS	2110	ETFDH	electron-transferring-flavoprotein dehydrogenase	1.79156	0.00020707
GO_OXIDATION_REDUCTION_PROCESS	50814	NSDHL	NAD(P) dependent steroid dehydrogenase-like	-2.14416	0.00831368
GO_OXIDATION_REDUCTION_PROCESS	192286	HIGD2A	HIG1 hypoxia inducible domain family, member 2A	1.64608	0.030476
GO_OXIDATION_REDUCTION_PROCESS	3032	HADHB	hydroxyacyl-CoA dehydrogenase/3-ketoacyl-CoA thiolase/enoyl-CoA hydratase (trifunctional protein), beta subunit	1.92885	0.000229025
GO_OXIDATION_REDUCTION_PROCESS	9572	NR1D1	nuclear receptor subfamily 1, group D, member 1	-2.71243	0.00139493
GO_OXIDATION_REDUCTION_PROCESS	8804	CREG1	cellular repressor of E1A-stimulated genes 1	1.60634	0.00313283
GO_OXIDATION_REDUCTION_PROCESS	54884	RETSAT	retinol saturase (all-trans-retinol 13,14-reductase)	4.89906	9.08576e-05
GO_OXIDATION_REDUCTION_PROCESS	6391	SDHC	succinate dehydrogenase complex, subunit C, integral membrane protein, 15kDa	1.62795	0.00613126
GO_OXIDATION_REDUCTION_PROCESS	1371	CPOX	coproporphyrinogen oxidase	1.91579	0.000180559
GO_OXIDATION_REDUCTION_PROCESS	1580	CYP4B1	cytochrome P450, family 4, subfamily B, polypeptide 1	1.52747	0.0026546
GO_OXIDATION_REDUCTION_PROCESS	51302	CYP39A1	cytochrome P450, family 39, subfamily A, polypeptide 1	2.42464	0.00251403
GO_OXIDATION_REDUCTION_PROCESS	5825	ABCD3	ATP-binding cassette, sub-family D (ALD), member 3	1.6066	0.00182228
GO_OXIDATION_REDUCTION_PROCESS	2157	F8	coagulation factor VIII, procoagulant component	1.54088	0.0141895
GO_OXIDATION_REDUCTION_PROCESS	3030	HADHA	hydroxyacyl-CoA dehydrogenase/3-ketoacyl-CoA thiolase/enoyl-CoA hydratase (trifunctional protein), alpha subunit	1.54394	0.000306471
GO_OXIDATION_REDUCTION_PROCESS	847	CAT	catalase	1.60446	0.00171348
GO_OXIDATION_REDUCTION_PROCESS	1376	CPT2	carnitine palmitoyltransferase 2	2.1735	0.00144014
GO_OXIDATION_REDUCTION_PROCESS	224	ALDH3A2	aldehyde dehydrogenase 3 family, member A2	3.5243	0.00086725
GO_OXIDATION_REDUCTION_PROCESS	4129	MAOB	monoamine oxidase B	1.63753	0.00256494
GO_OXIDATION_REDUCTION_PROCESS	2820	GPD2	glycerol-3-phosphate dehydrogenase 2 (mitochondrial)	1.58725	0.0356215
GO_OXIDATION_REDUCTION_PROCESS	4524	MTHFR	methylenetetrahydrofolate reductase (NAD(P)H)	1.66844	0.0183477
GO_OXIDATION_REDUCTION_PROCESS	51170	HSD17B11	hydroxysteroid (17-beta) dehydrogenase 11	2.21898	0.00142
GO_OXIDATION_REDUCTION_PROCESS	2745	GLRX	glutaredoxin (thioltransferase)	2.03647	0.00779883
GO_OXIDATION_REDUCTION_PROCESS	1576	CYP3A4	cytochrome P450, family 3, subfamily A, polypeptide 4	2.18741	0.000111938
GO_OXIDATION_REDUCTION_PROCESS	8424	BBOX1	butyrobetaine (gamma), 2-oxoglutarate dioxygenase (gamma-butyrobetaine hydroxylase) 1	1.59043	0.00889699
GO_OXIDATION_REDUCTION_PROCESS	4329	ALDH6A1	aldehyde dehydrogenase 6 family, member A1	1.55718	0.0130025
GO_OXIDATION_REDUCTION_PROCESS	3953	LEPR	leptin receptor	1.63649	0.00281941
GO_OXIDATION_REDUCTION_PROCESS	873	CBR1	carbonyl reductase 1	1.60544	0.00024507
GO_OXIDATION_REDUCTION_PROCESS	3162	HMOX1	heme oxygenase (decycling) 1	1.56257	0.0232432
GO_OXIDATION_REDUCTION_PROCESS	8608	RDH16	retinol dehydrogenase 16 (all-trans)	1.6667	0.00456152
GO_OXIDATION_REDUCTION_PROCESS	6999	TDO2	tryptophan 2,3-dioxygenase	1.54417	0.00989422
GO_OXIDATION_REDUCTION_PROCESS	1962	EHHADH	enoyl-CoA, hydratase/3-hydroxyacyl CoA dehydrogenase	9.64907	0.000126974
GO_OXIDATION_REDUCTION_PROCESS	4715	NDUFB9	NADH dehydrogenase (ubiquinone) 1 beta subcomplex, 9, 22kDa	1.63818	0.0326675
GO_OXIDATION_REDUCTION_PROCESS	1582	CYP8B1	cytochrome P450, family 8, subfamily B, polypeptide 1	3.55399	0.00785468
GO_OXIDATION_REDUCTION_PROCESS	9997	SCO2	SCO cytochrome oxidase deficient homolog 2 (yeast)	2.07655	0.0062045
GO_OXIDATION_REDUCTION_PROCESS	54677	CROT	carnitine O-octanoyltransferase	1.87563	0.000840794
GO_OXIDATION_REDUCTION_PROCESS	26063	DECR2	2,4-dienoyl CoA reductase 2, peroxisomal	1.90336	0.004052
GO_OXIDATION_REDUCTION_PROCESS	84263	HSDL2	hydroxysteroid dehydrogenase like 2	2.03511	0.000666637
GO_OXIDATION_REDUCTION_PROCESS	5507	PPP1R3C	protein phosphatase 1, regulatory subunit 3C	2.33024	0.0220096
GO_OXIDATION_REDUCTION_PROCESS	225	ABCD2	ATP-binding cassette, sub-family D (ALD), member 2	1.80682	0.0319243
GO_OXIDATION_REDUCTION_PROCESS	1718	DHCR24	24-dehydrocholesterol reductase	-1.58136	0.0182725
GO_OXIDATION_REDUCTION_PROCESS	1632	ECI1	enoyl-CoA delta isomerase 1	1.7211	0.00210442
GO_OXIDATION_REDUCTION_PROCESS	4199	ME1	malic enzyme 1, NADP(+)-dependent, cytosolic	1.98158	0.0424975
GO_OXIDATION_REDUCTION_PROCESS	10901	DHRS4	dehydrogenase/reductase (SDR family) member 4	1.58677	0.00312422
GO_OXIDATION_REDUCTION_PROCESS	6821	SUOX	sulfite oxidase	1.57706	0.00517778
GO_OXIDATION_REDUCTION_PROCESS	10954	PDIA5	protein disulfide isomerase family A, member 5	-1.51962	0.0279201
GO_OXIDATION_REDUCTION_PROCESS	7412	VCAM1	vascular cell adhesion molecule 1	1.66558	0.00324484
GO_OXIDATION_REDUCTION_PROCESS	1891	ECH1	enoyl CoA hydratase 1, peroxisomal	1.6658	0.00260057
GO_OXIDATION_REDUCTION_PROCESS	3290	HSD11B1	hydroxysteroid (11-beta) dehydrogenase 1	1.5875	0.00360464
GO_OXIDATION_REDUCTION_PROCESS	6713	SQLE	squalene epoxidase	-2.98702	0.00195107
GO_OXIDATION_REDUCTION_PROCESS	34	ACADM	acyl-CoA dehydrogenase, C-4 to C-12 straight chain	1.99474	0.000454357
GO_OXIDATION_REDUCTION_PROCESS	345275	HSD17B13	hydroxysteroid (17-beta) dehydrogenase 13	2.11392	0.000255374
GO_OXIDATION_REDUCTION_PROCESS	3295	HSD17B4	hydroxysteroid (17-beta) dehydrogenase 4	1.58035	0.000403005
GO_OXIDATION_REDUCTION_PROCESS	51	ACOX1	acyl-CoA oxidase 1, palmitoyl	1.66627	0.00242207
GO_OXIDATION_REDUCTION_PROCESS	26061	HACL1	2-hydroxyacyl-CoA lyase 1	2.10651	0.000775308
GO_OXIDATION_REDUCTION_PROCESS	1384	CRAT	carnitine O-acetyltransferase	2.85378	0.00285356
GO_OXIDATION_REDUCTION_PROCESS	2531	KDSR	3-ketodihydrosphingosine reductase	1.50092	0.00438066
GO_OXIDATION_REDUCTION_PROCESS	3033	HADH	hydroxyacyl-CoA dehydrogenase	1.52063	0.000393585
GO_OXIDATION_REDUCTION_PROCESS	9446	GSTO1	glutathione S-transferase omega 1	1.52302	0.00912031
GO_OXIDATION_REDUCTION_PROCESS	3156	HMGCR	3-hydroxy-3-methylglutaryl-CoA reductase	-1.61115	0.0191748
GO_OXIDATION_REDUCTION_PROCESS	1595	CYP51A1	cytochrome P450, family 51, subfamily A, polypeptide 1	-2.46406	0.00328032
GO_CATABOLIC_PROCESS	3030	HADHA	hydroxyacyl-CoA dehydrogenase/3-ketoacyl-CoA thiolase/enoyl-CoA hydratase (trifunctional protein), alpha subunit	1.54394	0.000306471
GO_CATABOLIC_PROCESS	847	CAT	catalase	1.60446	0.00171348
GO_CATABOLIC_PROCESS	3309	HSPA5	heat shock 70kDa protein 5 (glucose-regulated protein, 78kDa)	1.50922	0.0237466
GO_CATABOLIC_PROCESS	5825	ABCD3	ATP-binding cassette, sub-family D (ALD), member 3	1.6066	0.00182228
GO_CATABOLIC_PROCESS	58476	TP53INP2	tumor protein p53 inducible nuclear protein 2	1.72446	0.00352989
GO_CATABOLIC_PROCESS	2052	EPHX1	epoxide hydrolase 1, microsomal (xenobiotic)	2.1115	0.00232446
GO_CATABOLIC_PROCESS	51302	CYP39A1	cytochrome P450, family 39, subfamily A, polypeptide 1	2.42464	0.00251403
GO_CATABOLIC_PROCESS	1580	CYP4B1	cytochrome P450, family 4, subfamily B, polypeptide 1	1.52747	0.0026546
GO_CATABOLIC_PROCESS	58511	DNASE2B	deoxyribonuclease II beta	1.55098	0.00041792
GO_CATABOLIC_PROCESS	2171	FABP5	fatty acid binding protein 5 (psoriasis-associated)	-1.73529	0.00148123
GO_CATABOLIC_PROCESS	1890	TYMP	thymidine phosphorylase	2.07655	0.0062045
GO_CATABOLIC_PROCESS	9575	CLOCK	clock homolog (mouse)	1.77624	0.000602631
GO_CATABOLIC_PROCESS	9572	NR1D1	nuclear receptor subfamily 1, group D, member 1	-2.71243	0.00139493
GO_CATABOLIC_PROCESS	3032	HADHB	hydroxyacyl-CoA dehydrogenase/3-ketoacyl-CoA thiolase/enoyl-CoA hydratase (trifunctional protein), beta subunit	1.92885	0.000229025
GO_CATABOLIC_PROCESS	10455	ECI2	enoyl-CoA delta isomerase 2	1.74498	0.00178871
GO_CATABOLIC_PROCESS	2110	ETFDH	electron-transferring-flavoprotein dehydrogenase	1.79156	0.00020707
GO_CATABOLIC_PROCESS	11343	MGLL	monoglyceride lipase	1.86235	0.00245045
GO_CATABOLIC_PROCESS	27329	ANGPTL3	angiopoietin-like 3	1.50328	0.00531285
GO_CATABOLIC_PROCESS	2731	GLDC	glycine dehydrogenase (decarboxylating)	2.24637	0.000863899
GO_CATABOLIC_PROCESS	635	BHMT	betaine--homocysteine S-methyltransferase	1.70162	0.0343933
GO_CATABOLIC_PROCESS	33	ACADL	acyl-CoA dehydrogenase, long chain	1.72816	0.0028287
GO_CATABOLIC_PROCESS	84129	ACAD11	acyl-CoA dehydrogenase family, member 11	1.67146	0.000646651
GO_CATABOLIC_PROCESS	1666	DECR1	2,4-dienoyl CoA reductase 1, mitochondrial	1.7845	0.000543546
GO_CATABOLIC_PROCESS	1375	CPT1B	carnitine palmitoyltransferase 1B (muscle)	1.50418	0.0301416
GO_CATABOLIC_PROCESS	10894	LYVE1	lymphatic vessel endothelial hyaluronan receptor 1	1.67944	0.00115597
GO_CATABOLIC_PROCESS	4715	NDUFB9	NADH dehydrogenase (ubiquinone) 1 beta subcomplex, 9, 22kDa	1.63818	0.0326675
GO_CATABOLIC_PROCESS	7363	UGT2B4	UDP glucuronosyltransferase 2 family, polypeptide B4	1.69942	0.0412316
GO_CATABOLIC_PROCESS	51166	AADAT	aminoadipate aminotransferase	1.53724	0.0176972
GO_CATABOLIC_PROCESS	6999	TDO2	tryptophan 2,3-dioxygenase	1.54417	0.00989422
GO_CATABOLIC_PROCESS	1200	TPP1	tripeptidyl peptidase I	1.72256	0.0208322
GO_CATABOLIC_PROCESS	2180	ACSL1	acyl-CoA synthetase long-chain family member 1	3.24665	0.00047773
GO_CATABOLIC_PROCESS	1962	EHHADH	enoyl-CoA, hydratase/3-hydroxyacyl CoA dehydrogenase	9.64907	0.000126974
GO_CATABOLIC_PROCESS	57104	PNPLA2	patatin-like phospholipase domain containing 2	1.81129	0.022903
GO_CATABOLIC_PROCESS	6400	SEL1L	sel-1 suppressor of lin-12-like (C. elegans)	1.5051	0.00447047
GO_CATABOLIC_PROCESS	3162	HMOX1	heme oxygenase (decycling) 1	1.56257	0.0232432
GO_CATABOLIC_PROCESS	9776	ATG13	ATG13 autophagy related 13 homolog (S. cerevisiae)	1.51192	0.0269545
GO_CATABOLIC_PROCESS	1491	CTH	cystathionase (cystathionine gamma-lyase)	1.64867	0.00943928
GO_CATABOLIC_PROCESS	84447	SYVN1	synovial apoptosis inhibitor 1, synoviolin	1.65736	0.00317976
GO_CATABOLIC_PROCESS	2053	EPHX2	epoxide hydrolase 2, cytoplasmic	2.12978	0.000393204
GO_CATABOLIC_PROCESS	4329	ALDH6A1	aldehyde dehydrogenase 6 family, member A1	1.55718	0.0130025
GO_CATABOLIC_PROCESS	2820	GPD2	glycerol-3-phosphate dehydrogenase 2 (mitochondrial)	1.58725	0.0356215
GO_CATABOLIC_PROCESS	51170	HSD17B11	hydroxysteroid (17-beta) dehydrogenase 11	2.21898	0.00142
GO_CATABOLIC_PROCESS	5657	PRTN3	proteinase 3	-1.71323	0.000352091
GO_CATABOLIC_PROCESS	1576	CYP3A4	cytochrome P450, family 3, subfamily A, polypeptide 4	2.18741	0.000111938
GO_CATABOLIC_PROCESS	224	ALDH3A2	aldehyde dehydrogenase 3 family, member A2	3.5243	0.00086725
GO_CATABOLIC_PROCESS	3034	HAL	histidine ammonia-lyase	1.89235	0.0132952
GO_CATABOLIC_PROCESS	54461	FBXW5	F-box and WD repeat domain containing 5	1.52258	0.0344069
GO_CATABOLIC_PROCESS	3988	LIPA	lipase A, lysosomal acid, cholesterol esterase	1.61684	0.00596293
GO_CATABOLIC_PROCESS	2710	GK	glycerol kinase	1.6816	0.0019605
GO_CATABOLIC_PROCESS	4129	MAOB	monoamine oxidase B	1.63753	0.00256494
GO_CATABOLIC_PROCESS	1376	CPT2	carnitine palmitoyltransferase 2	2.1735	0.00144014
GO_CATABOLIC_PROCESS	122970	ACOT4	acyl-CoA thioesterase 4	3.38432	0.00368984
GO_CATABOLIC_PROCESS	38	ACAT1	acetyl-CoA acetyltransferase 1	1.77339	0.000855305
GO_CATABOLIC_PROCESS	841	CASP8	caspase 8, apoptosis-related cysteine peptidase	1.73114	0.0138296
GO_CATABOLIC_PROCESS	1891	ECH1	enoyl CoA hydratase 1, peroxisomal	1.6658	0.00260057
GO_CATABOLIC_PROCESS	23576	DDAH1	dimethylarginine dimethylaminohydrolase 1	2.68367	0.011911
GO_CATABOLIC_PROCESS	4780	NFE2L2	nuclear factor (erythroid-derived 2)-like 2	1.5745	0.0454686
GO_CATABOLIC_PROCESS	1632	ECI1	enoyl-CoA delta isomerase 1	1.7211	0.00210442
GO_CATABOLIC_PROCESS	80216	ALPK1	alpha-kinase 1	-2.57373	0.00510243
GO_CATABOLIC_PROCESS	9317	PTER	phosphotriesterase related	-1.7866	0.00138071
GO_CATABOLIC_PROCESS	225	ABCD2	ATP-binding cassette, sub-family D (ALD), member 2	1.80682	0.0319243
GO_CATABOLIC_PROCESS	2944	GSTM1	glutathione S-transferase mu 1	1.53353	0.0245594
GO_CATABOLIC_PROCESS	125061	AFMID	arylformamidase	2.05169	0.00261766
GO_CATABOLIC_PROCESS	406	ARNTL	aryl hydrocarbon receptor nuclear translocator-like	3.5615	0.000290506
GO_CATABOLIC_PROCESS	54677	CROT	carnitine O-octanoyltransferase	1.87563	0.000840794
GO_CATABOLIC_PROCESS	1807	DPYS	dihydropyrimidinase	1.53281	0.00564242
GO_CATABOLIC_PROCESS	9446	GSTO1	glutathione S-transferase omega 1	1.52302	0.00912031
GO_CATABOLIC_PROCESS	25953	PNKD	paroxysmal nonkinesigenic dyskinesia	1.52536	0.00310289
GO_CATABOLIC_PROCESS	201595	STT3B	STT3, subunit of the oligosaccharyltransferase complex, homolog B (S. cerevisiae)	1.72235	0.00723731
GO_CATABOLIC_PROCESS	3033	HADH	hydroxyacyl-CoA dehydrogenase	1.52063	0.000393585
GO_CATABOLIC_PROCESS	283927	NUDT7	nudix (nucleoside diphosphate linked moiety X)-type motif 7	-2.17292	0.0458252
GO_CATABOLIC_PROCESS	51	ACOX1	acyl-CoA oxidase 1, palmitoyl	1.66627	0.00242207
GO_CATABOLIC_PROCESS	23259	DDHD2	DDHD domain containing 2	1.6491	0.0163086
GO_CATABOLIC_PROCESS	57406	ABHD6	abhydrolase domain containing 6	2.36925	0.00436045
GO_CATABOLIC_PROCESS	26061	HACL1	2-hydroxyacyl-CoA lyase 1	2.10651	0.000775308
GO_CATABOLIC_PROCESS	435	ASL	argininosuccinate lyase	1.53763	0.0277105
GO_CATABOLIC_PROCESS	23327	NEDD4L	neural precursor cell expressed, developmentally down-regulated 4-like	1.94241	0.015046
GO_CATABOLIC_PROCESS	1384	CRAT	carnitine O-acetyltransferase	2.85378	0.00285356
GO_CATABOLIC_PROCESS	3295	HSD17B4	hydroxysteroid (17-beta) dehydrogenase 4	1.58035	0.000403005
GO_CATABOLIC_PROCESS	5444	PON1	paraoxonase 1	1.51404	0.00152714
GO_CATABOLIC_PROCESS	4969	OGN	osteoglycin	1.73328	0.024935
GO_CATABOLIC_PROCESS	34	ACADM	acyl-CoA dehydrogenase, C-4 to C-12 straight chain	1.99474	0.000454357
GO_CATABOLIC_PROCESS	10845	CLPX	ClpX caseinolytic peptidase X homolog (E. coli)	3.21089	0.00030944
GO_CATABOLIC_PROCESS	8856	NR1I2	nuclear receptor subfamily 1, group I, member 2	1.57155	0.00343849
GO_MONOCARBOXYLIC_ACID_METABOLIC_PROCESS	1632	ECI1	enoyl-CoA delta isomerase 1	1.7211	0.00210442
GO_MONOCARBOXYLIC_ACID_METABOLIC_PROCESS	6584	SLC22A5	solute carrier family 22 (organic cation/carnitine transporter), member 5	2.19767	0.00263368
GO_MONOCARBOXYLIC_ACID_METABOLIC_PROCESS	1891	ECH1	enoyl CoA hydratase 1, peroxisomal	1.6658	0.00260057
GO_MONOCARBOXYLIC_ACID_METABOLIC_PROCESS	10965	ACOT2	acyl-CoA thioesterase 2	4.63269	0.0062207
GO_MONOCARBOXYLIC_ACID_METABOLIC_PROCESS	54677	CROT	carnitine O-octanoyltransferase	1.87563	0.000840794
GO_MONOCARBOXYLIC_ACID_METABOLIC_PROCESS	26063	DECR2	2,4-dienoyl CoA reductase 2, peroxisomal	1.90336	0.004052
GO_MONOCARBOXYLIC_ACID_METABOLIC_PROCESS	133688	UGT3A1	UDP glycosyltransferase 3 family, polypeptide A1	1.59242	0.000962368
GO_MONOCARBOXYLIC_ACID_METABOLIC_PROCESS	225	ABCD2	ATP-binding cassette, sub-family D (ALD), member 2	1.80682	0.0319243
GO_MONOCARBOXYLIC_ACID_METABOLIC_PROCESS	3033	HADH	hydroxyacyl-CoA dehydrogenase	1.52063	0.000393585
GO_MONOCARBOXYLIC_ACID_METABOLIC_PROCESS	8876	VNN1	vanin 1	3.1305	0.000774131
GO_MONOCARBOXYLIC_ACID_METABOLIC_PROCESS	25953	PNKD	paroxysmal nonkinesigenic dyskinesia	1.52536	0.00310289
GO_MONOCARBOXYLIC_ACID_METABOLIC_PROCESS	134526	ACOT12	acyl-CoA thioesterase 12	1.89251	0.0005775
GO_MONOCARBOXYLIC_ACID_METABOLIC_PROCESS	6566	SLC16A1	solute carrier family 16, member 1 (monocarboxylic acid transporter 1)	2.16833	0.0025293
GO_MONOCARBOXYLIC_ACID_METABOLIC_PROCESS	34	ACADM	acyl-CoA dehydrogenase, C-4 to C-12 straight chain	1.99474	0.000454357
GO_MONOCARBOXYLIC_ACID_METABOLIC_PROCESS	3295	HSD17B4	hydroxysteroid (17-beta) dehydrogenase 4	1.58035	0.000403005
GO_MONOCARBOXYLIC_ACID_METABOLIC_PROCESS	1384	CRAT	carnitine O-acetyltransferase	2.85378	0.00285356
GO_MONOCARBOXYLIC_ACID_METABOLIC_PROCESS	51	ACOX1	acyl-CoA oxidase 1, palmitoyl	1.66627	0.00242207
GO_MONOCARBOXYLIC_ACID_METABOLIC_PROCESS	26061	HACL1	2-hydroxyacyl-CoA lyase 1	2.10651	0.000775308
GO_MONOCARBOXYLIC_ACID_METABOLIC_PROCESS	51302	CYP39A1	cytochrome P450, family 39, subfamily A, polypeptide 1	2.42464	0.00251403
GO_MONOCARBOXYLIC_ACID_METABOLIC_PROCESS	5825	ABCD3	ATP-binding cassette, sub-family D (ALD), member 3	1.6066	0.00182228
GO_MONOCARBOXYLIC_ACID_METABOLIC_PROCESS	972	CD74	CD74 molecule, major histocompatibility complex, class II invariant chain	2.00907	0.00446325
GO_MONOCARBOXYLIC_ACID_METABOLIC_PROCESS	3030	HADHA	hydroxyacyl-CoA dehydrogenase/3-ketoacyl-CoA thiolase/enoyl-CoA hydratase (trifunctional protein), alpha subunit	1.54394	0.000306471
GO_MONOCARBOXYLIC_ACID_METABOLIC_PROCESS	1375	CPT1B	carnitine palmitoyltransferase 1B (muscle)	1.50418	0.0301416
GO_MONOCARBOXYLIC_ACID_METABOLIC_PROCESS	60481	ELOVL5	ELOVL fatty acid elongase 5	2.31279	0.00910325
GO_MONOCARBOXYLIC_ACID_METABOLIC_PROCESS	1666	DECR1	2,4-dienoyl CoA reductase 1, mitochondrial	1.7845	0.000543546
GO_MONOCARBOXYLIC_ACID_METABOLIC_PROCESS	33	ACADL	acyl-CoA dehydrogenase, long chain	1.72816	0.0028287
GO_MONOCARBOXYLIC_ACID_METABOLIC_PROCESS	392636	AGMO	alkylglycerol monooxygenase	1.78901	0.00121152
GO_MONOCARBOXYLIC_ACID_METABOLIC_PROCESS	84129	ACAD11	acyl-CoA dehydrogenase family, member 11	1.67146	0.000646651
GO_MONOCARBOXYLIC_ACID_METABOLIC_PROCESS	27329	ANGPTL3	angiopoietin-like 3	1.50328	0.00531285
GO_MONOCARBOXYLIC_ACID_METABOLIC_PROCESS	2731	GLDC	glycine dehydrogenase (decarboxylating)	2.24637	0.000863899
GO_MONOCARBOXYLIC_ACID_METABOLIC_PROCESS	11343	MGLL	monoglyceride lipase	1.86235	0.00245045
GO_MONOCARBOXYLIC_ACID_METABOLIC_PROCESS	2110	ETFDH	electron-transferring-flavoprotein dehydrogenase	1.79156	0.00020707
GO_MONOCARBOXYLIC_ACID_METABOLIC_PROCESS	10455	ECI2	enoyl-CoA delta isomerase 2	1.74498	0.00178871
GO_MONOCARBOXYLIC_ACID_METABOLIC_PROCESS	6296	ACSM3	acyl-CoA synthetase medium-chain family member 3	1.55279	0.0151525
GO_MONOCARBOXYLIC_ACID_METABOLIC_PROCESS	3032	HADHB	hydroxyacyl-CoA dehydrogenase/3-ketoacyl-CoA thiolase/enoyl-CoA hydratase (trifunctional protein), beta subunit	1.92885	0.000229025
GO_MONOCARBOXYLIC_ACID_METABOLIC_PROCESS	83401	ELOVL3	ELOVL fatty acid elongase 3	6.40236	0.00054127
GO_MONOCARBOXYLIC_ACID_METABOLIC_PROCESS	873	CBR1	carbonyl reductase 1	1.60544	0.00024507
GO_MONOCARBOXYLIC_ACID_METABOLIC_PROCESS	641371	ACOT1	acyl-CoA thioesterase 1	9.21084	0.000784115
GO_MONOCARBOXYLIC_ACID_METABOLIC_PROCESS	1962	EHHADH	enoyl-CoA, hydratase/3-hydroxyacyl CoA dehydrogenase	9.64907	0.000126974
GO_MONOCARBOXYLIC_ACID_METABOLIC_PROCESS	7363	UGT2B4	UDP glucuronosyltransferase 2 family, polypeptide B4	1.69942	0.0412316
GO_MONOCARBOXYLIC_ACID_METABOLIC_PROCESS	2180	ACSL1	acyl-CoA synthetase long-chain family member 1	3.24665	0.00047773
GO_MONOCARBOXYLIC_ACID_METABOLIC_PROCESS	1582	CYP8B1	cytochrome P450, family 8, subfamily B, polypeptide 1	3.55399	0.00785468
GO_MONOCARBOXYLIC_ACID_METABOLIC_PROCESS	51703	ACSL5	acyl-CoA synthetase long-chain family member 5	1.6176	0.000648662
GO_MONOCARBOXYLIC_ACID_METABOLIC_PROCESS	1376	CPT2	carnitine palmitoyltransferase 2	2.1735	0.00144014
GO_MONOCARBOXYLIC_ACID_METABOLIC_PROCESS	122970	ACOT4	acyl-CoA thioesterase 4	3.38432	0.00368984
GO_MONOCARBOXYLIC_ACID_METABOLIC_PROCESS	3034	HAL	histidine ammonia-lyase	1.89235	0.0132952
GO_MONOCARBOXYLIC_ACID_METABOLIC_PROCESS	224	ALDH3A2	aldehyde dehydrogenase 3 family, member A2	3.5243	0.00086725
GO_MONOCARBOXYLIC_ACID_METABOLIC_PROCESS	3988	LIPA	lipase A, lysosomal acid, cholesterol esterase	1.61684	0.00596293
GO_MONOCARBOXYLIC_ACID_METABOLIC_PROCESS	55350	VNN3	vanin 3	1.81445	0.000890907
GO_MONOCARBOXYLIC_ACID_METABOLIC_PROCESS	79799	UGT2A3	UDP glucuronosyltransferase 2 family, polypeptide A3	1.76358	0.0229191
GO_MONOCARBOXYLIC_ACID_METABOLIC_PROCESS	8424	BBOX1	butyrobetaine (gamma), 2-oxoglutarate dioxygenase (gamma-butyrobetaine hydroxylase) 1	1.59043	0.00889699
GO_MONOCARBOXYLIC_ACID_METABOLIC_PROCESS	2053	EPHX2	epoxide hydrolase 2, cytoplasmic	2.12978	0.000393204
GO_CELLULAR_CATABOLIC_PROCESS	3033	HADH	hydroxyacyl-CoA dehydrogenase	1.52063	0.000393585
GO_CELLULAR_CATABOLIC_PROCESS	283927	NUDT7	nudix (nucleoside diphosphate linked moiety X)-type motif 7	-2.17292	0.0458252
GO_CELLULAR_CATABOLIC_PROCESS	25953	PNKD	paroxysmal nonkinesigenic dyskinesia	1.52536	0.00310289
GO_CELLULAR_CATABOLIC_PROCESS	201595	STT3B	STT3, subunit of the oligosaccharyltransferase complex, homolog B (S. cerevisiae)	1.72235	0.00723731
GO_CELLULAR_CATABOLIC_PROCESS	9446	GSTO1	glutathione S-transferase omega 1	1.52302	0.00912031
GO_CELLULAR_CATABOLIC_PROCESS	1807	DPYS	dihydropyrimidinase	1.53281	0.00564242
GO_CELLULAR_CATABOLIC_PROCESS	8856	NR1I2	nuclear receptor subfamily 1, group I, member 2	1.57155	0.00343849
GO_CELLULAR_CATABOLIC_PROCESS	10845	CLPX	ClpX caseinolytic peptidase X homolog (E. coli)	3.21089	0.00030944
GO_CELLULAR_CATABOLIC_PROCESS	34	ACADM	acyl-CoA dehydrogenase, C-4 to C-12 straight chain	1.99474	0.000454357
GO_CELLULAR_CATABOLIC_PROCESS	4969	OGN	osteoglycin	1.73328	0.024935
GO_CELLULAR_CATABOLIC_PROCESS	5444	PON1	paraoxonase 1	1.51404	0.00152714
GO_CELLULAR_CATABOLIC_PROCESS	3295	HSD17B4	hydroxysteroid (17-beta) dehydrogenase 4	1.58035	0.000403005
GO_CELLULAR_CATABOLIC_PROCESS	23327	NEDD4L	neural precursor cell expressed, developmentally down-regulated 4-like	1.94241	0.015046
GO_CELLULAR_CATABOLIC_PROCESS	1384	CRAT	carnitine O-acetyltransferase	2.85378	0.00285356
GO_CELLULAR_CATABOLIC_PROCESS	435	ASL	argininosuccinate lyase	1.53763	0.0277105
GO_CELLULAR_CATABOLIC_PROCESS	26061	HACL1	2-hydroxyacyl-CoA lyase 1	2.10651	0.000775308
GO_CELLULAR_CATABOLIC_PROCESS	57406	ABHD6	abhydrolase domain containing 6	2.36925	0.00436045
GO_CELLULAR_CATABOLIC_PROCESS	51	ACOX1	acyl-CoA oxidase 1, palmitoyl	1.66627	0.00242207
GO_CELLULAR_CATABOLIC_PROCESS	1632	ECI1	enoyl-CoA delta isomerase 1	1.7211	0.00210442
GO_CELLULAR_CATABOLIC_PROCESS	4780	NFE2L2	nuclear factor (erythroid-derived 2)-like 2	1.5745	0.0454686
GO_CELLULAR_CATABOLIC_PROCESS	23576	DDAH1	dimethylarginine dimethylaminohydrolase 1	2.68367	0.011911
GO_CELLULAR_CATABOLIC_PROCESS	1891	ECH1	enoyl CoA hydratase 1, peroxisomal	1.6658	0.00260057
GO_CELLULAR_CATABOLIC_PROCESS	841	CASP8	caspase 8, apoptosis-related cysteine peptidase	1.73114	0.0138296
GO_CELLULAR_CATABOLIC_PROCESS	54677	CROT	carnitine O-octanoyltransferase	1.87563	0.000840794
GO_CELLULAR_CATABOLIC_PROCESS	406	ARNTL	aryl hydrocarbon receptor nuclear translocator-like	3.5615	0.000290506
GO_CELLULAR_CATABOLIC_PROCESS	125061	AFMID	arylformamidase	2.05169	0.00261766
GO_CELLULAR_CATABOLIC_PROCESS	2944	GSTM1	glutathione S-transferase mu 1	1.53353	0.0245594
GO_CELLULAR_CATABOLIC_PROCESS	225	ABCD2	ATP-binding cassette, sub-family D (ALD), member 2	1.80682	0.0319243
GO_CELLULAR_CATABOLIC_PROCESS	3162	HMOX1	heme oxygenase (decycling) 1	1.56257	0.0232432
GO_CELLULAR_CATABOLIC_PROCESS	6400	SEL1L	sel-1 suppressor of lin-12-like (C. elegans)	1.5051	0.00447047
GO_CELLULAR_CATABOLIC_PROCESS	57104	PNPLA2	patatin-like phospholipase domain containing 2	1.81129	0.022903
GO_CELLULAR_CATABOLIC_PROCESS	1962	EHHADH	enoyl-CoA, hydratase/3-hydroxyacyl CoA dehydrogenase	9.64907	0.000126974
GO_CELLULAR_CATABOLIC_PROCESS	1200	TPP1	tripeptidyl peptidase I	1.72256	0.0208322
GO_CELLULAR_CATABOLIC_PROCESS	6999	TDO2	tryptophan 2,3-dioxygenase	1.54417	0.00989422
GO_CELLULAR_CATABOLIC_PROCESS	2180	ACSL1	acyl-CoA synthetase long-chain family member 1	3.24665	0.00047773
GO_CELLULAR_CATABOLIC_PROCESS	51166	AADAT	aminoadipate aminotransferase	1.53724	0.0176972
GO_CELLULAR_CATABOLIC_PROCESS	38	ACAT1	acetyl-CoA acetyltransferase 1	1.77339	0.000855305
GO_CELLULAR_CATABOLIC_PROCESS	122970	ACOT4	acyl-CoA thioesterase 4	3.38432	0.00368984
GO_CELLULAR_CATABOLIC_PROCESS	1376	CPT2	carnitine palmitoyltransferase 2	2.1735	0.00144014
GO_CELLULAR_CATABOLIC_PROCESS	4129	MAOB	monoamine oxidase B	1.63753	0.00256494
GO_CELLULAR_CATABOLIC_PROCESS	2710	GK	glycerol kinase	1.6816	0.0019605
GO_CELLULAR_CATABOLIC_PROCESS	3034	HAL	histidine ammonia-lyase	1.89235	0.0132952
GO_CELLULAR_CATABOLIC_PROCESS	54461	FBXW5	F-box and WD repeat domain containing 5	1.52258	0.0344069
GO_CELLULAR_CATABOLIC_PROCESS	224	ALDH3A2	aldehyde dehydrogenase 3 family, member A2	3.5243	0.00086725
GO_CELLULAR_CATABOLIC_PROCESS	1576	CYP3A4	cytochrome P450, family 3, subfamily A, polypeptide 4	2.18741	0.000111938
GO_CELLULAR_CATABOLIC_PROCESS	2820	GPD2	glycerol-3-phosphate dehydrogenase 2 (mitochondrial)	1.58725	0.0356215
GO_CELLULAR_CATABOLIC_PROCESS	4329	ALDH6A1	aldehyde dehydrogenase 6 family, member A1	1.55718	0.0130025
GO_CELLULAR_CATABOLIC_PROCESS	2053	EPHX2	epoxide hydrolase 2, cytoplasmic	2.12978	0.000393204
GO_CELLULAR_CATABOLIC_PROCESS	84447	SYVN1	synovial apoptosis inhibitor 1, synoviolin	1.65736	0.00317976
GO_CELLULAR_CATABOLIC_PROCESS	1491	CTH	cystathionase (cystathionine gamma-lyase)	1.64867	0.00943928
GO_CELLULAR_CATABOLIC_PROCESS	9575	CLOCK	clock homolog (mouse)	1.77624	0.000602631
GO_CELLULAR_CATABOLIC_PROCESS	1890	TYMP	thymidine phosphorylase	2.07655	0.0062045
GO_CELLULAR_CATABOLIC_PROCESS	2171	FABP5	fatty acid binding protein 5 (psoriasis-associated)	-1.73529	0.00148123
GO_CELLULAR_CATABOLIC_PROCESS	58511	DNASE2B	deoxyribonuclease II beta	1.55098	0.00041792
GO_CELLULAR_CATABOLIC_PROCESS	1580	CYP4B1	cytochrome P450, family 4, subfamily B, polypeptide 1	1.52747	0.0026546
GO_CELLULAR_CATABOLIC_PROCESS	51302	CYP39A1	cytochrome P450, family 39, subfamily A, polypeptide 1	2.42464	0.00251403
GO_CELLULAR_CATABOLIC_PROCESS	2052	EPHX1	epoxide hydrolase 1, microsomal (xenobiotic)	2.1115	0.00232446
GO_CELLULAR_CATABOLIC_PROCESS	58476	TP53INP2	tumor protein p53 inducible nuclear protein 2	1.72446	0.00352989
GO_CELLULAR_CATABOLIC_PROCESS	5825	ABCD3	ATP-binding cassette, sub-family D (ALD), member 3	1.6066	0.00182228
GO_CELLULAR_CATABOLIC_PROCESS	3309	HSPA5	heat shock 70kDa protein 5 (glucose-regulated protein, 78kDa)	1.50922	0.0237466
GO_CELLULAR_CATABOLIC_PROCESS	847	CAT	catalase	1.60446	0.00171348
GO_CELLULAR_CATABOLIC_PROCESS	3030	HADHA	hydroxyacyl-CoA dehydrogenase/3-ketoacyl-CoA thiolase/enoyl-CoA hydratase (trifunctional protein), alpha subunit	1.54394	0.000306471
GO_CELLULAR_CATABOLIC_PROCESS	1375	CPT1B	carnitine palmitoyltransferase 1B (muscle)	1.50418	0.0301416
GO_CELLULAR_CATABOLIC_PROCESS	1666	DECR1	2,4-dienoyl CoA reductase 1, mitochondrial	1.7845	0.000543546
GO_CELLULAR_CATABOLIC_PROCESS	84129	ACAD11	acyl-CoA dehydrogenase family, member 11	1.67146	0.000646651
GO_CELLULAR_CATABOLIC_PROCESS	635	BHMT	betaine--homocysteine S-methyltransferase	1.70162	0.0343933
GO_CELLULAR_CATABOLIC_PROCESS	33	ACADL	acyl-CoA dehydrogenase, long chain	1.72816	0.0028287
GO_CELLULAR_CATABOLIC_PROCESS	27329	ANGPTL3	angiopoietin-like 3	1.50328	0.00531285
GO_CELLULAR_CATABOLIC_PROCESS	2731	GLDC	glycine dehydrogenase (decarboxylating)	2.24637	0.000863899
GO_CELLULAR_CATABOLIC_PROCESS	2110	ETFDH	electron-transferring-flavoprotein dehydrogenase	1.79156	0.00020707
GO_CELLULAR_CATABOLIC_PROCESS	11343	MGLL	monoglyceride lipase	1.86235	0.00245045
GO_CELLULAR_CATABOLIC_PROCESS	10455	ECI2	enoyl-CoA delta isomerase 2	1.74498	0.00178871
GO_CELLULAR_CATABOLIC_PROCESS	9572	NR1D1	nuclear receptor subfamily 1, group D, member 1	-2.71243	0.00139493
GO_CELLULAR_CATABOLIC_PROCESS	3032	HADHB	hydroxyacyl-CoA dehydrogenase/3-ketoacyl-CoA thiolase/enoyl-CoA hydratase (trifunctional protein), beta subunit	1.92885	0.000229025
GO_SINGLE_ORGANISM_CATABOLIC_PROCESS	38	ACAT1	acetyl-CoA acetyltransferase 1	1.77339	0.000855305
GO_SINGLE_ORGANISM_CATABOLIC_PROCESS	122970	ACOT4	acyl-CoA thioesterase 4	3.38432	0.00368984
GO_SINGLE_ORGANISM_CATABOLIC_PROCESS	1376	CPT2	carnitine palmitoyltransferase 2	2.1735	0.00144014
GO_SINGLE_ORGANISM_CATABOLIC_PROCESS	2710	GK	glycerol kinase	1.6816	0.0019605
GO_SINGLE_ORGANISM_CATABOLIC_PROCESS	3988	LIPA	lipase A, lysosomal acid, cholesterol esterase	1.61684	0.00596293
GO_SINGLE_ORGANISM_CATABOLIC_PROCESS	3034	HAL	histidine ammonia-lyase	1.89235	0.0132952
GO_SINGLE_ORGANISM_CATABOLIC_PROCESS	224	ALDH3A2	aldehyde dehydrogenase 3 family, member A2	3.5243	0.00086725
GO_SINGLE_ORGANISM_CATABOLIC_PROCESS	1576	CYP3A4	cytochrome P450, family 3, subfamily A, polypeptide 4	2.18741	0.000111938
GO_SINGLE_ORGANISM_CATABOLIC_PROCESS	2820	GPD2	glycerol-3-phosphate dehydrogenase 2 (mitochondrial)	1.58725	0.0356215
GO_SINGLE_ORGANISM_CATABOLIC_PROCESS	5657	PRTN3	proteinase 3	-1.71323	0.000352091
GO_SINGLE_ORGANISM_CATABOLIC_PROCESS	51170	HSD17B11	hydroxysteroid (17-beta) dehydrogenase 11	2.21898	0.00142
GO_SINGLE_ORGANISM_CATABOLIC_PROCESS	4329	ALDH6A1	aldehyde dehydrogenase 6 family, member A1	1.55718	0.0130025
GO_SINGLE_ORGANISM_CATABOLIC_PROCESS	2053	EPHX2	epoxide hydrolase 2, cytoplasmic	2.12978	0.000393204
GO_SINGLE_ORGANISM_CATABOLIC_PROCESS	84447	SYVN1	synovial apoptosis inhibitor 1, synoviolin	1.65736	0.00317976
GO_SINGLE_ORGANISM_CATABOLIC_PROCESS	1491	CTH	cystathionase (cystathionine gamma-lyase)	1.64867	0.00943928
GO_SINGLE_ORGANISM_CATABOLIC_PROCESS	9776	ATG13	ATG13 autophagy related 13 homolog (S. cerevisiae)	1.51192	0.0269545
GO_SINGLE_ORGANISM_CATABOLIC_PROCESS	3162	HMOX1	heme oxygenase (decycling) 1	1.56257	0.0232432
GO_SINGLE_ORGANISM_CATABOLIC_PROCESS	57104	PNPLA2	patatin-like phospholipase domain containing 2	1.81129	0.022903
GO_SINGLE_ORGANISM_CATABOLIC_PROCESS	6400	SEL1L	sel-1 suppressor of lin-12-like (C. elegans)	1.5051	0.00447047
GO_SINGLE_ORGANISM_CATABOLIC_PROCESS	1962	EHHADH	enoyl-CoA, hydratase/3-hydroxyacyl CoA dehydrogenase	9.64907	0.000126974
GO_SINGLE_ORGANISM_CATABOLIC_PROCESS	6999	TDO2	tryptophan 2,3-dioxygenase	1.54417	0.00989422
GO_SINGLE_ORGANISM_CATABOLIC_PROCESS	51166	AADAT	aminoadipate aminotransferase	1.53724	0.0176972
GO_SINGLE_ORGANISM_CATABOLIC_PROCESS	7363	UGT2B4	UDP glucuronosyltransferase 2 family, polypeptide B4	1.69942	0.0412316
GO_SINGLE_ORGANISM_CATABOLIC_PROCESS	10894	LYVE1	lymphatic vessel endothelial hyaluronan receptor 1	1.67944	0.00115597
GO_SINGLE_ORGANISM_CATABOLIC_PROCESS	4715	NDUFB9	NADH dehydrogenase (ubiquinone) 1 beta subcomplex, 9, 22kDa	1.63818	0.0326675
GO_SINGLE_ORGANISM_CATABOLIC_PROCESS	1375	CPT1B	carnitine palmitoyltransferase 1B (muscle)	1.50418	0.0301416
GO_SINGLE_ORGANISM_CATABOLIC_PROCESS	1666	DECR1	2,4-dienoyl CoA reductase 1, mitochondrial	1.7845	0.000543546
GO_SINGLE_ORGANISM_CATABOLIC_PROCESS	84129	ACAD11	acyl-CoA dehydrogenase family, member 11	1.67146	0.000646651
GO_SINGLE_ORGANISM_CATABOLIC_PROCESS	33	ACADL	acyl-CoA dehydrogenase, long chain	1.72816	0.0028287
GO_SINGLE_ORGANISM_CATABOLIC_PROCESS	635	BHMT	betaine--homocysteine S-methyltransferase	1.70162	0.0343933
GO_SINGLE_ORGANISM_CATABOLIC_PROCESS	2731	GLDC	glycine dehydrogenase (decarboxylating)	2.24637	0.000863899
GO_SINGLE_ORGANISM_CATABOLIC_PROCESS	27329	ANGPTL3	angiopoietin-like 3	1.50328	0.00531285
GO_SINGLE_ORGANISM_CATABOLIC_PROCESS	11343	MGLL	monoglyceride lipase	1.86235	0.00245045
GO_SINGLE_ORGANISM_CATABOLIC_PROCESS	2110	ETFDH	electron-transferring-flavoprotein dehydrogenase	1.79156	0.00020707
GO_SINGLE_ORGANISM_CATABOLIC_PROCESS	10455	ECI2	enoyl-CoA delta isomerase 2	1.74498	0.00178871
GO_SINGLE_ORGANISM_CATABOLIC_PROCESS	3032	HADHB	hydroxyacyl-CoA dehydrogenase/3-ketoacyl-CoA thiolase/enoyl-CoA hydratase (trifunctional protein), beta subunit	1.92885	0.000229025
GO_SINGLE_ORGANISM_CATABOLIC_PROCESS	1890	TYMP	thymidine phosphorylase	2.07655	0.0062045
GO_SINGLE_ORGANISM_CATABOLIC_PROCESS	2171	FABP5	fatty acid binding protein 5 (psoriasis-associated)	-1.73529	0.00148123
GO_SINGLE_ORGANISM_CATABOLIC_PROCESS	51302	CYP39A1	cytochrome P450, family 39, subfamily A, polypeptide 1	2.42464	0.00251403
GO_SINGLE_ORGANISM_CATABOLIC_PROCESS	5825	ABCD3	ATP-binding cassette, sub-family D (ALD), member 3	1.6066	0.00182228
GO_SINGLE_ORGANISM_CATABOLIC_PROCESS	3309	HSPA5	heat shock 70kDa protein 5 (glucose-regulated protein, 78kDa)	1.50922	0.0237466
GO_SINGLE_ORGANISM_CATABOLIC_PROCESS	847	CAT	catalase	1.60446	0.00171348
GO_SINGLE_ORGANISM_CATABOLIC_PROCESS	3030	HADHA	hydroxyacyl-CoA dehydrogenase/3-ketoacyl-CoA thiolase/enoyl-CoA hydratase (trifunctional protein), alpha subunit	1.54394	0.000306471
GO_SINGLE_ORGANISM_CATABOLIC_PROCESS	34	ACADM	acyl-CoA dehydrogenase, C-4 to C-12 straight chain	1.99474	0.000454357
GO_SINGLE_ORGANISM_CATABOLIC_PROCESS	4969	OGN	osteoglycin	1.73328	0.024935
GO_SINGLE_ORGANISM_CATABOLIC_PROCESS	5444	PON1	paraoxonase 1	1.51404	0.00152714
GO_SINGLE_ORGANISM_CATABOLIC_PROCESS	3295	HSD17B4	hydroxysteroid (17-beta) dehydrogenase 4	1.58035	0.000403005
GO_SINGLE_ORGANISM_CATABOLIC_PROCESS	1384	CRAT	carnitine O-acetyltransferase	2.85378	0.00285356
GO_SINGLE_ORGANISM_CATABOLIC_PROCESS	435	ASL	argininosuccinate lyase	1.53763	0.0277105
GO_SINGLE_ORGANISM_CATABOLIC_PROCESS	26061	HACL1	2-hydroxyacyl-CoA lyase 1	2.10651	0.000775308
GO_SINGLE_ORGANISM_CATABOLIC_PROCESS	51	ACOX1	acyl-CoA oxidase 1, palmitoyl	1.66627	0.00242207
GO_SINGLE_ORGANISM_CATABOLIC_PROCESS	57406	ABHD6	abhydrolase domain containing 6	2.36925	0.00436045
GO_SINGLE_ORGANISM_CATABOLIC_PROCESS	23259	DDHD2	DDHD domain containing 2	1.6491	0.0163086
GO_SINGLE_ORGANISM_CATABOLIC_PROCESS	283927	NUDT7	nudix (nucleoside diphosphate linked moiety X)-type motif 7	-2.17292	0.0458252
GO_SINGLE_ORGANISM_CATABOLIC_PROCESS	3033	HADH	hydroxyacyl-CoA dehydrogenase	1.52063	0.000393585
GO_SINGLE_ORGANISM_CATABOLIC_PROCESS	201595	STT3B	STT3, subunit of the oligosaccharyltransferase complex, homolog B (S. cerevisiae)	1.72235	0.00723731
GO_SINGLE_ORGANISM_CATABOLIC_PROCESS	25953	PNKD	paroxysmal nonkinesigenic dyskinesia	1.52536	0.00310289
GO_SINGLE_ORGANISM_CATABOLIC_PROCESS	1807	DPYS	dihydropyrimidinase	1.53281	0.00564242
GO_SINGLE_ORGANISM_CATABOLIC_PROCESS	54677	CROT	carnitine O-octanoyltransferase	1.87563	0.000840794
GO_SINGLE_ORGANISM_CATABOLIC_PROCESS	125061	AFMID	arylformamidase	2.05169	0.00261766
GO_SINGLE_ORGANISM_CATABOLIC_PROCESS	225	ABCD2	ATP-binding cassette, sub-family D (ALD), member 2	1.80682	0.0319243
GO_SINGLE_ORGANISM_CATABOLIC_PROCESS	80216	ALPK1	alpha-kinase 1	-2.57373	0.00510243
GO_SINGLE_ORGANISM_CATABOLIC_PROCESS	1632	ECI1	enoyl-CoA delta isomerase 1	1.7211	0.00210442
GO_SINGLE_ORGANISM_CATABOLIC_PROCESS	23576	DDAH1	dimethylarginine dimethylaminohydrolase 1	2.68367	0.011911
GO_SINGLE_ORGANISM_CATABOLIC_PROCESS	1891	ECH1	enoyl CoA hydratase 1, peroxisomal	1.6658	0.00260057
GO_SINGLE_ORGANISM_BIOSYNTHETIC_PROCESS	38	ACAT1	acetyl-CoA acetyltransferase 1	1.77339	0.000855305
GO_SINGLE_ORGANISM_BIOSYNTHETIC_PROCESS	224	ALDH3A2	aldehyde dehydrogenase 3 family, member A2	3.5243	0.00086725
GO_SINGLE_ORGANISM_BIOSYNTHETIC_PROCESS	3931	LCAT	lecithin-cholesterol acyltransferase	1.64584	0.0152627
GO_SINGLE_ORGANISM_BIOSYNTHETIC_PROCESS	2710	GK	glycerol kinase	1.6816	0.0019605
GO_SINGLE_ORGANISM_BIOSYNTHETIC_PROCESS	51141	INSIG2	insulin induced gene 2	4.51312	0.000275459
GO_SINGLE_ORGANISM_BIOSYNTHETIC_PROCESS	1576	CYP3A4	cytochrome P450, family 3, subfamily A, polypeptide 4	2.18741	0.000111938
GO_SINGLE_ORGANISM_BIOSYNTHETIC_PROCESS	2820	GPD2	glycerol-3-phosphate dehydrogenase 2 (mitochondrial)	1.58725	0.0356215
GO_SINGLE_ORGANISM_BIOSYNTHETIC_PROCESS	51170	HSD17B11	hydroxysteroid (17-beta) dehydrogenase 11	2.21898	0.00142
GO_SINGLE_ORGANISM_BIOSYNTHETIC_PROCESS	8424	BBOX1	butyrobetaine (gamma), 2-oxoglutarate dioxygenase (gamma-butyrobetaine hydroxylase) 1	1.59043	0.00889699
GO_SINGLE_ORGANISM_BIOSYNTHETIC_PROCESS	1491	CTH	cystathionase (cystathionine gamma-lyase)	1.64867	0.00943928
GO_SINGLE_ORGANISM_BIOSYNTHETIC_PROCESS	1119	CHKA	choline kinase alpha	2.68308	0.00340228
GO_SINGLE_ORGANISM_BIOSYNTHETIC_PROCESS	2224	FDPS	farnesyl diphosphate synthase	-2.6974	0.00172661
GO_SINGLE_ORGANISM_BIOSYNTHETIC_PROCESS	873	CBR1	carbonyl reductase 1	1.60544	0.00024507
GO_SINGLE_ORGANISM_BIOSYNTHETIC_PROCESS	2939	GSTA2	glutathione S-transferase alpha 2	2.34296	0.0223154
GO_SINGLE_ORGANISM_BIOSYNTHETIC_PROCESS	2180	ACSL1	acyl-CoA synthetase long-chain family member 1	3.24665	0.00047773
GO_SINGLE_ORGANISM_BIOSYNTHETIC_PROCESS	1582	CYP8B1	cytochrome P450, family 8, subfamily B, polypeptide 1	3.55399	0.00785468
GO_SINGLE_ORGANISM_BIOSYNTHETIC_PROCESS	8660	IRS2	insulin receptor substrate 2	1.76076	0.0410914
GO_SINGLE_ORGANISM_BIOSYNTHETIC_PROCESS	60481	ELOVL5	ELOVL fatty acid elongase 5	2.31279	0.00910325
GO_SINGLE_ORGANISM_BIOSYNTHETIC_PROCESS	1050	CEBPA	CCAAT/enhancer binding protein (C/EBP), alpha	-1.51687	0.0147935
GO_SINGLE_ORGANISM_BIOSYNTHETIC_PROCESS	635	BHMT	betaine--homocysteine S-methyltransferase	1.70162	0.0343933
GO_SINGLE_ORGANISM_BIOSYNTHETIC_PROCESS	392636	AGMO	alkylglycerol monooxygenase	1.78901	0.00121152
GO_SINGLE_ORGANISM_BIOSYNTHETIC_PROCESS	11343	MGLL	monoglyceride lipase	1.86235	0.00245045
GO_SINGLE_ORGANISM_BIOSYNTHETIC_PROCESS	50814	NSDHL	NAD(P) dependent steroid dehydrogenase-like	-2.14416	0.00831368
GO_SINGLE_ORGANISM_BIOSYNTHETIC_PROCESS	10195	ALG3	asparagine-linked glycosylation 3, alpha-1,3- mannosyltransferase homolog (S. cerevisiae)	1.6181	0.0213585
GO_SINGLE_ORGANISM_BIOSYNTHETIC_PROCESS	6296	ACSM3	acyl-CoA synthetase medium-chain family member 3	1.55279	0.0151525
GO_SINGLE_ORGANISM_BIOSYNTHETIC_PROCESS	9572	NR1D1	nuclear receptor subfamily 1, group D, member 1	-2.71243	0.00139493
GO_SINGLE_ORGANISM_BIOSYNTHETIC_PROCESS	83401	ELOVL3	ELOVL fatty acid elongase 3	6.40236	0.00054127
GO_SINGLE_ORGANISM_BIOSYNTHETIC_PROCESS	2171	FABP5	fatty acid binding protein 5 (psoriasis-associated)	-1.73529	0.00148123
GO_SINGLE_ORGANISM_BIOSYNTHETIC_PROCESS	1890	TYMP	thymidine phosphorylase	2.07655	0.0062045
GO_SINGLE_ORGANISM_BIOSYNTHETIC_PROCESS	2984	GUCY2C	guanylate cyclase 2C (heat stable enterotoxin receptor)	-1.67592	0.0313742
GO_SINGLE_ORGANISM_BIOSYNTHETIC_PROCESS	51302	CYP39A1	cytochrome P450, family 39, subfamily A, polypeptide 1	2.42464	0.00251403
GO_SINGLE_ORGANISM_BIOSYNTHETIC_PROCESS	1371	CPOX	coproporphyrinogen oxidase	1.91579	0.000180559
GO_SINGLE_ORGANISM_BIOSYNTHETIC_PROCESS	128869	PIGU	phosphatidylinositol glycan anchor biosynthesis, class U	1.72966	0.00213706
GO_SINGLE_ORGANISM_BIOSYNTHETIC_PROCESS	5825	ABCD3	ATP-binding cassette, sub-family D (ALD), member 3	1.6066	0.00182228
GO_SINGLE_ORGANISM_BIOSYNTHETIC_PROCESS	9697	TRAM2	translocation associated membrane protein 2	1.64222	0.00351851
GO_SINGLE_ORGANISM_BIOSYNTHETIC_PROCESS	972	CD74	CD74 molecule, major histocompatibility complex, class II invariant chain	2.00907	0.00446325
GO_SINGLE_ORGANISM_BIOSYNTHETIC_PROCESS	1407	CRY1	cryptochrome 1 (photolyase-like)	2.34398	0.00040721
GO_SINGLE_ORGANISM_BIOSYNTHETIC_PROCESS	2950	GSTP1	glutathione S-transferase pi 1	1.63912	0.0200483
GO_SINGLE_ORGANISM_BIOSYNTHETIC_PROCESS	6713	SQLE	squalene epoxidase	-2.98702	0.00195107
GO_SINGLE_ORGANISM_BIOSYNTHETIC_PROCESS	34	ACADM	acyl-CoA dehydrogenase, C-4 to C-12 straight chain	1.99474	0.000454357
GO_SINGLE_ORGANISM_BIOSYNTHETIC_PROCESS	4969	OGN	osteoglycin	1.73328	0.024935
GO_SINGLE_ORGANISM_BIOSYNTHETIC_PROCESS	3295	HSD17B4	hydroxysteroid (17-beta) dehydrogenase 4	1.58035	0.000403005
GO_SINGLE_ORGANISM_BIOSYNTHETIC_PROCESS	128486	FITM2	fat storage-inducing transmembrane protein 2	1.79922	0.00138607
GO_SINGLE_ORGANISM_BIOSYNTHETIC_PROCESS	435	ASL	argininosuccinate lyase	1.53763	0.0277105
GO_SINGLE_ORGANISM_BIOSYNTHETIC_PROCESS	161247	FITM1	fat storage-inducing transmembrane protein 1	1.84418	0.00727275
GO_SINGLE_ORGANISM_BIOSYNTHETIC_PROCESS	23259	DDHD2	DDHD domain containing 2	1.6491	0.0163086
GO_SINGLE_ORGANISM_BIOSYNTHETIC_PROCESS	2531	KDSR	3-ketodihydrosphingosine reductase	1.50092	0.00438066
GO_SINGLE_ORGANISM_BIOSYNTHETIC_PROCESS	2940	GSTA3	glutathione S-transferase alpha 3	1.75395	0.0010179
GO_SINGLE_ORGANISM_BIOSYNTHETIC_PROCESS	53354	PANK1	pantothenate kinase 1	1.50012	0.00261402
GO_SINGLE_ORGANISM_BIOSYNTHETIC_PROCESS	8869	ST3GAL5	ST3 beta-galactoside alpha-2,3-sialyltransferase 5	2.04168	0.000344308
GO_SINGLE_ORGANISM_BIOSYNTHETIC_PROCESS	9446	GSTO1	glutathione S-transferase omega 1	1.52302	0.00912031
GO_SINGLE_ORGANISM_BIOSYNTHETIC_PROCESS	2356	FPGS	folylpolyglutamate synthase	1.56811	0.000276656
GO_SINGLE_ORGANISM_BIOSYNTHETIC_PROCESS	1595	CYP51A1	cytochrome P450, family 51, subfamily A, polypeptide 1	-2.46406	0.00328032
GO_SINGLE_ORGANISM_BIOSYNTHETIC_PROCESS	3156	HMGCR	3-hydroxy-3-methylglutaryl-CoA reductase	-1.61115	0.0191748
GO_SINGLE_ORGANISM_BIOSYNTHETIC_PROCESS	26063	DECR2	2,4-dienoyl CoA reductase 2, peroxisomal	1.90336	0.004052
GO_SINGLE_ORGANISM_BIOSYNTHETIC_PROCESS	10555	AGPAT2	1-acylglycerol-3-phosphate O-acyltransferase 2 (lysophosphatidic acid acyltransferase, beta)	1.89944	0.00515849
GO_SINGLE_ORGANISM_BIOSYNTHETIC_PROCESS	283	ANG	angiogenin, ribonuclease, RNase A family, 5	-2.27736	0.0190897
GO_SINGLE_ORGANISM_BIOSYNTHETIC_PROCESS	3158	HMGCS2	3-hydroxy-3-methylglutaryl-CoA synthase 2 (mitochondrial)	1.69489	0.00079222
GO_SINGLE_ORGANISM_BIOSYNTHETIC_PROCESS	3422	IDI1	isopentenyl-diphosphate delta isomerase 1	-3.14131	0.000814091
GO_SINGLE_ORGANISM_BIOSYNTHETIC_PROCESS	10400	PEMT	phosphatidylethanolamine N-methyltransferase	1.51585	0.0193472
GO_SINGLE_ORGANISM_BIOSYNTHETIC_PROCESS	2944	GSTM1	glutathione S-transferase mu 1	1.53353	0.0245594
GO_SINGLE_ORGANISM_BIOSYNTHETIC_PROCESS	125061	AFMID	arylformamidase	2.05169	0.00261766
GO_SINGLE_ORGANISM_BIOSYNTHETIC_PROCESS	5507	PPP1R3C	protein phosphatase 1, regulatory subunit 3C	2.33024	0.0220096
GO_SINGLE_ORGANISM_BIOSYNTHETIC_PROCESS	283459	GATC	glutamyl-tRNA(Gln) amidotransferase, subunit C homolog (bacterial)	1.57923	0.00814744
GO_SINGLE_ORGANISM_BIOSYNTHETIC_PROCESS	4199	ME1	malic enzyme 1, NADP(+)-dependent, cytosolic	1.98158	0.0424975
GO_SINGLE_ORGANISM_BIOSYNTHETIC_PROCESS	1718	DHCR24	24-dehydrocholesterol reductase	-1.58136	0.0182725
GO_SINGLE_ORGANISM_BIOSYNTHETIC_PROCESS	51477	ISYNA1	inositol-3-phosphate synthase 1	-2.42543	0.00551362
GO_SINGLE_ORGANISM_BIOSYNTHETIC_PROCESS	79087	ALG12	asparagine-linked glycosylation 12, alpha-1,6-mannosyltransferase homolog (S. cerevisiae)	1.55588	0.0161877
GO_SINGLE_ORGANISM_BIOSYNTHETIC_PROCESS	2941	GSTA4	glutathione S-transferase alpha 4	1.59347	0.049026
GO_SINGLE_ORGANISM_BIOSYNTHETIC_PROCESS	4953	ODC1	ornithine decarboxylase 1	1.62416	0.00584339
GO_SINGLE_ORGANISM_BIOSYNTHETIC_PROCESS	3290	HSD11B1	hydroxysteroid (11-beta) dehydrogenase 1	1.5875	0.00360464
GO_ORGANIC_ACID_CATABOLIC_PROCESS	2731	GLDC	glycine dehydrogenase (decarboxylating)	2.24637	0.000863899
GO_ORGANIC_ACID_CATABOLIC_PROCESS	84129	ACAD11	acyl-CoA dehydrogenase family, member 11	1.67146	0.000646651
GO_ORGANIC_ACID_CATABOLIC_PROCESS	33	ACADL	acyl-CoA dehydrogenase, long chain	1.72816	0.0028287
GO_ORGANIC_ACID_CATABOLIC_PROCESS	1666	DECR1	2,4-dienoyl CoA reductase 1, mitochondrial	1.7845	0.000543546
GO_ORGANIC_ACID_CATABOLIC_PROCESS	1375	CPT1B	carnitine palmitoyltransferase 1B (muscle)	1.50418	0.0301416
GO_ORGANIC_ACID_CATABOLIC_PROCESS	3032	HADHB	hydroxyacyl-CoA dehydrogenase/3-ketoacyl-CoA thiolase/enoyl-CoA hydratase (trifunctional protein), beta subunit	1.92885	0.000229025
GO_ORGANIC_ACID_CATABOLIC_PROCESS	10455	ECI2	enoyl-CoA delta isomerase 2	1.74498	0.00178871
GO_ORGANIC_ACID_CATABOLIC_PROCESS	2110	ETFDH	electron-transferring-flavoprotein dehydrogenase	1.79156	0.00020707
GO_ORGANIC_ACID_CATABOLIC_PROCESS	51302	CYP39A1	cytochrome P450, family 39, subfamily A, polypeptide 1	2.42464	0.00251403
GO_ORGANIC_ACID_CATABOLIC_PROCESS	3030	HADHA	hydroxyacyl-CoA dehydrogenase/3-ketoacyl-CoA thiolase/enoyl-CoA hydratase (trifunctional protein), alpha subunit	1.54394	0.000306471
GO_ORGANIC_ACID_CATABOLIC_PROCESS	5825	ABCD3	ATP-binding cassette, sub-family D (ALD), member 3	1.6066	0.00182228
GO_ORGANIC_ACID_CATABOLIC_PROCESS	224	ALDH3A2	aldehyde dehydrogenase 3 family, member A2	3.5243	0.00086725
GO_ORGANIC_ACID_CATABOLIC_PROCESS	3034	HAL	histidine ammonia-lyase	1.89235	0.0132952
GO_ORGANIC_ACID_CATABOLIC_PROCESS	122970	ACOT4	acyl-CoA thioesterase 4	3.38432	0.00368984
GO_ORGANIC_ACID_CATABOLIC_PROCESS	1376	CPT2	carnitine palmitoyltransferase 2	2.1735	0.00144014
GO_ORGANIC_ACID_CATABOLIC_PROCESS	38	ACAT1	acetyl-CoA acetyltransferase 1	1.77339	0.000855305
GO_ORGANIC_ACID_CATABOLIC_PROCESS	1491	CTH	cystathionase (cystathionine gamma-lyase)	1.64867	0.00943928
GO_ORGANIC_ACID_CATABOLIC_PROCESS	4329	ALDH6A1	aldehyde dehydrogenase 6 family, member A1	1.55718	0.0130025
GO_ORGANIC_ACID_CATABOLIC_PROCESS	6999	TDO2	tryptophan 2,3-dioxygenase	1.54417	0.00989422
GO_ORGANIC_ACID_CATABOLIC_PROCESS	51166	AADAT	aminoadipate aminotransferase	1.53724	0.0176972
GO_ORGANIC_ACID_CATABOLIC_PROCESS	1962	EHHADH	enoyl-CoA, hydratase/3-hydroxyacyl CoA dehydrogenase	9.64907	0.000126974
GO_ORGANIC_ACID_CATABOLIC_PROCESS	54677	CROT	carnitine O-octanoyltransferase	1.87563	0.000840794
GO_ORGANIC_ACID_CATABOLIC_PROCESS	225	ABCD2	ATP-binding cassette, sub-family D (ALD), member 2	1.80682	0.0319243
GO_ORGANIC_ACID_CATABOLIC_PROCESS	125061	AFMID	arylformamidase	2.05169	0.00261766
GO_ORGANIC_ACID_CATABOLIC_PROCESS	23576	DDAH1	dimethylarginine dimethylaminohydrolase 1	2.68367	0.011911
GO_ORGANIC_ACID_CATABOLIC_PROCESS	1632	ECI1	enoyl-CoA delta isomerase 1	1.7211	0.00210442
GO_ORGANIC_ACID_CATABOLIC_PROCESS	1891	ECH1	enoyl CoA hydratase 1, peroxisomal	1.6658	0.00260057
GO_ORGANIC_ACID_CATABOLIC_PROCESS	34	ACADM	acyl-CoA dehydrogenase, C-4 to C-12 straight chain	1.99474	0.000454357
GO_ORGANIC_ACID_CATABOLIC_PROCESS	26061	HACL1	2-hydroxyacyl-CoA lyase 1	2.10651	0.000775308
GO_ORGANIC_ACID_CATABOLIC_PROCESS	51	ACOX1	acyl-CoA oxidase 1, palmitoyl	1.66627	0.00242207
GO_ORGANIC_ACID_CATABOLIC_PROCESS	1384	CRAT	carnitine O-acetyltransferase	2.85378	0.00285356
GO_ORGANIC_ACID_CATABOLIC_PROCESS	435	ASL	argininosuccinate lyase	1.53763	0.0277105
GO_ORGANIC_ACID_CATABOLIC_PROCESS	5444	PON1	paraoxonase 1	1.51404	0.00152714
GO_ORGANIC_ACID_CATABOLIC_PROCESS	3295	HSD17B4	hydroxysteroid (17-beta) dehydrogenase 4	1.58035	0.000403005
GO_ORGANIC_ACID_CATABOLIC_PROCESS	3033	HADH	hydroxyacyl-CoA dehydrogenase	1.52063	0.000393585
GO_FATTY_ACID_METABOLIC_PROCESS	27329	ANGPTL3	angiopoietin-like 3	1.50328	0.00531285
GO_FATTY_ACID_METABOLIC_PROCESS	33	ACADL	acyl-CoA dehydrogenase, long chain	1.72816	0.0028287
GO_FATTY_ACID_METABOLIC_PROCESS	84129	ACAD11	acyl-CoA dehydrogenase family, member 11	1.67146	0.000646651
GO_FATTY_ACID_METABOLIC_PROCESS	392636	AGMO	alkylglycerol monooxygenase	1.78901	0.00121152
GO_FATTY_ACID_METABOLIC_PROCESS	1666	DECR1	2,4-dienoyl CoA reductase 1, mitochondrial	1.7845	0.000543546
GO_FATTY_ACID_METABOLIC_PROCESS	60481	ELOVL5	ELOVL fatty acid elongase 5	2.31279	0.00910325
GO_FATTY_ACID_METABOLIC_PROCESS	1375	CPT1B	carnitine palmitoyltransferase 1B (muscle)	1.50418	0.0301416
GO_FATTY_ACID_METABOLIC_PROCESS	3032	HADHB	hydroxyacyl-CoA dehydrogenase/3-ketoacyl-CoA thiolase/enoyl-CoA hydratase (trifunctional protein), beta subunit	1.92885	0.000229025
GO_FATTY_ACID_METABOLIC_PROCESS	83401	ELOVL3	ELOVL fatty acid elongase 3	6.40236	0.00054127
GO_FATTY_ACID_METABOLIC_PROCESS	6296	ACSM3	acyl-CoA synthetase medium-chain family member 3	1.55279	0.0151525
GO_FATTY_ACID_METABOLIC_PROCESS	10455	ECI2	enoyl-CoA delta isomerase 2	1.74498	0.00178871
GO_FATTY_ACID_METABOLIC_PROCESS	2110	ETFDH	electron-transferring-flavoprotein dehydrogenase	1.79156	0.00020707
GO_FATTY_ACID_METABOLIC_PROCESS	11343	MGLL	monoglyceride lipase	1.86235	0.00245045
GO_FATTY_ACID_METABOLIC_PROCESS	3030	HADHA	hydroxyacyl-CoA dehydrogenase/3-ketoacyl-CoA thiolase/enoyl-CoA hydratase (trifunctional protein), alpha subunit	1.54394	0.000306471
GO_FATTY_ACID_METABOLIC_PROCESS	972	CD74	CD74 molecule, major histocompatibility complex, class II invariant chain	2.00907	0.00446325
GO_FATTY_ACID_METABOLIC_PROCESS	5825	ABCD3	ATP-binding cassette, sub-family D (ALD), member 3	1.6066	0.00182228
GO_FATTY_ACID_METABOLIC_PROCESS	224	ALDH3A2	aldehyde dehydrogenase 3 family, member A2	3.5243	0.00086725
GO_FATTY_ACID_METABOLIC_PROCESS	3988	LIPA	lipase A, lysosomal acid, cholesterol esterase	1.61684	0.00596293
GO_FATTY_ACID_METABOLIC_PROCESS	1376	CPT2	carnitine palmitoyltransferase 2	2.1735	0.00144014
GO_FATTY_ACID_METABOLIC_PROCESS	122970	ACOT4	acyl-CoA thioesterase 4	3.38432	0.00368984
GO_FATTY_ACID_METABOLIC_PROCESS	2053	EPHX2	epoxide hydrolase 2, cytoplasmic	2.12978	0.000393204
GO_FATTY_ACID_METABOLIC_PROCESS	873	CBR1	carbonyl reductase 1	1.60544	0.00024507
GO_FATTY_ACID_METABOLIC_PROCESS	641371	ACOT1	acyl-CoA thioesterase 1	9.21084	0.000784115
GO_FATTY_ACID_METABOLIC_PROCESS	51703	ACSL5	acyl-CoA synthetase long-chain family member 5	1.6176	0.000648662
GO_FATTY_ACID_METABOLIC_PROCESS	2180	ACSL1	acyl-CoA synthetase long-chain family member 1	3.24665	0.00047773
GO_FATTY_ACID_METABOLIC_PROCESS	1962	EHHADH	enoyl-CoA, hydratase/3-hydroxyacyl CoA dehydrogenase	9.64907	0.000126974
GO_FATTY_ACID_METABOLIC_PROCESS	54677	CROT	carnitine O-octanoyltransferase	1.87563	0.000840794
GO_FATTY_ACID_METABOLIC_PROCESS	26063	DECR2	2,4-dienoyl CoA reductase 2, peroxisomal	1.90336	0.004052
GO_FATTY_ACID_METABOLIC_PROCESS	225	ABCD2	ATP-binding cassette, sub-family D (ALD), member 2	1.80682	0.0319243
GO_FATTY_ACID_METABOLIC_PROCESS	1632	ECI1	enoyl-CoA delta isomerase 1	1.7211	0.00210442
GO_FATTY_ACID_METABOLIC_PROCESS	10965	ACOT2	acyl-CoA thioesterase 2	4.63269	0.0062207
GO_FATTY_ACID_METABOLIC_PROCESS	1891	ECH1	enoyl CoA hydratase 1, peroxisomal	1.6658	0.00260057
GO_FATTY_ACID_METABOLIC_PROCESS	34	ACADM	acyl-CoA dehydrogenase, C-4 to C-12 straight chain	1.99474	0.000454357
GO_FATTY_ACID_METABOLIC_PROCESS	51	ACOX1	acyl-CoA oxidase 1, palmitoyl	1.66627	0.00242207
GO_FATTY_ACID_METABOLIC_PROCESS	26061	HACL1	2-hydroxyacyl-CoA lyase 1	2.10651	0.000775308
GO_FATTY_ACID_METABOLIC_PROCESS	1384	CRAT	carnitine O-acetyltransferase	2.85378	0.00285356
GO_FATTY_ACID_METABOLIC_PROCESS	3295	HSD17B4	hydroxysteroid (17-beta) dehydrogenase 4	1.58035	0.000403005
GO_FATTY_ACID_METABOLIC_PROCESS	3033	HADH	hydroxyacyl-CoA dehydrogenase	1.52063	0.000393585
GO_FATTY_ACID_METABOLIC_PROCESS	134526	ACOT12	acyl-CoA thioesterase 12	1.89251	0.0005775
GO_SMALL_MOLECULE_CATABOLIC_PROCESS	51302	CYP39A1	cytochrome P450, family 39, subfamily A, polypeptide 1	2.42464	0.00251403
GO_SMALL_MOLECULE_CATABOLIC_PROCESS	3030	HADHA	hydroxyacyl-CoA dehydrogenase/3-ketoacyl-CoA thiolase/enoyl-CoA hydratase (trifunctional protein), alpha subunit	1.54394	0.000306471
GO_SMALL_MOLECULE_CATABOLIC_PROCESS	5825	ABCD3	ATP-binding cassette, sub-family D (ALD), member 3	1.6066	0.00182228
GO_SMALL_MOLECULE_CATABOLIC_PROCESS	84129	ACAD11	acyl-CoA dehydrogenase family, member 11	1.67146	0.000646651
GO_SMALL_MOLECULE_CATABOLIC_PROCESS	635	BHMT	betaine--homocysteine S-methyltransferase	1.70162	0.0343933
GO_SMALL_MOLECULE_CATABOLIC_PROCESS	33	ACADL	acyl-CoA dehydrogenase, long chain	1.72816	0.0028287
GO_SMALL_MOLECULE_CATABOLIC_PROCESS	2731	GLDC	glycine dehydrogenase (decarboxylating)	2.24637	0.000863899
GO_SMALL_MOLECULE_CATABOLIC_PROCESS	1375	CPT1B	carnitine palmitoyltransferase 1B (muscle)	1.50418	0.0301416
GO_SMALL_MOLECULE_CATABOLIC_PROCESS	1666	DECR1	2,4-dienoyl CoA reductase 1, mitochondrial	1.7845	0.000543546
GO_SMALL_MOLECULE_CATABOLIC_PROCESS	3032	HADHB	hydroxyacyl-CoA dehydrogenase/3-ketoacyl-CoA thiolase/enoyl-CoA hydratase (trifunctional protein), beta subunit	1.92885	0.000229025
GO_SMALL_MOLECULE_CATABOLIC_PROCESS	2110	ETFDH	electron-transferring-flavoprotein dehydrogenase	1.79156	0.00020707
GO_SMALL_MOLECULE_CATABOLIC_PROCESS	10455	ECI2	enoyl-CoA delta isomerase 2	1.74498	0.00178871
GO_SMALL_MOLECULE_CATABOLIC_PROCESS	1962	EHHADH	enoyl-CoA, hydratase/3-hydroxyacyl CoA dehydrogenase	9.64907	0.000126974
GO_SMALL_MOLECULE_CATABOLIC_PROCESS	6999	TDO2	tryptophan 2,3-dioxygenase	1.54417	0.00989422
GO_SMALL_MOLECULE_CATABOLIC_PROCESS	51166	AADAT	aminoadipate aminotransferase	1.53724	0.0176972
GO_SMALL_MOLECULE_CATABOLIC_PROCESS	2710	GK	glycerol kinase	1.6816	0.0019605
GO_SMALL_MOLECULE_CATABOLIC_PROCESS	3034	HAL	histidine ammonia-lyase	1.89235	0.0132952
GO_SMALL_MOLECULE_CATABOLIC_PROCESS	224	ALDH3A2	aldehyde dehydrogenase 3 family, member A2	3.5243	0.00086725
GO_SMALL_MOLECULE_CATABOLIC_PROCESS	38	ACAT1	acetyl-CoA acetyltransferase 1	1.77339	0.000855305
GO_SMALL_MOLECULE_CATABOLIC_PROCESS	122970	ACOT4	acyl-CoA thioesterase 4	3.38432	0.00368984
GO_SMALL_MOLECULE_CATABOLIC_PROCESS	1376	CPT2	carnitine palmitoyltransferase 2	2.1735	0.00144014
GO_SMALL_MOLECULE_CATABOLIC_PROCESS	4329	ALDH6A1	aldehyde dehydrogenase 6 family, member A1	1.55718	0.0130025
GO_SMALL_MOLECULE_CATABOLIC_PROCESS	1491	CTH	cystathionase (cystathionine gamma-lyase)	1.64867	0.00943928
GO_SMALL_MOLECULE_CATABOLIC_PROCESS	2820	GPD2	glycerol-3-phosphate dehydrogenase 2 (mitochondrial)	1.58725	0.0356215
GO_SMALL_MOLECULE_CATABOLIC_PROCESS	23576	DDAH1	dimethylarginine dimethylaminohydrolase 1	2.68367	0.011911
GO_SMALL_MOLECULE_CATABOLIC_PROCESS	1632	ECI1	enoyl-CoA delta isomerase 1	1.7211	0.00210442
GO_SMALL_MOLECULE_CATABOLIC_PROCESS	1891	ECH1	enoyl CoA hydratase 1, peroxisomal	1.6658	0.00260057
GO_SMALL_MOLECULE_CATABOLIC_PROCESS	54677	CROT	carnitine O-octanoyltransferase	1.87563	0.000840794
GO_SMALL_MOLECULE_CATABOLIC_PROCESS	125061	AFMID	arylformamidase	2.05169	0.00261766
GO_SMALL_MOLECULE_CATABOLIC_PROCESS	225	ABCD2	ATP-binding cassette, sub-family D (ALD), member 2	1.80682	0.0319243
GO_SMALL_MOLECULE_CATABOLIC_PROCESS	3033	HADH	hydroxyacyl-CoA dehydrogenase	1.52063	0.000393585
GO_SMALL_MOLECULE_CATABOLIC_PROCESS	25953	PNKD	paroxysmal nonkinesigenic dyskinesia	1.52536	0.00310289
GO_SMALL_MOLECULE_CATABOLIC_PROCESS	34	ACADM	acyl-CoA dehydrogenase, C-4 to C-12 straight chain	1.99474	0.000454357
GO_SMALL_MOLECULE_CATABOLIC_PROCESS	1384	CRAT	carnitine O-acetyltransferase	2.85378	0.00285356
GO_SMALL_MOLECULE_CATABOLIC_PROCESS	435	ASL	argininosuccinate lyase	1.53763	0.0277105
GO_SMALL_MOLECULE_CATABOLIC_PROCESS	26061	HACL1	2-hydroxyacyl-CoA lyase 1	2.10651	0.000775308
GO_SMALL_MOLECULE_CATABOLIC_PROCESS	51	ACOX1	acyl-CoA oxidase 1, palmitoyl	1.66627	0.00242207
GO_SMALL_MOLECULE_CATABOLIC_PROCESS	5444	PON1	paraoxonase 1	1.51404	0.00152714
GO_SMALL_MOLECULE_CATABOLIC_PROCESS	3295	HSD17B4	hydroxysteroid (17-beta) dehydrogenase 4	1.58035	0.000403005
GO_ORGANONITROGEN_COMPOUND_METABOLIC_PROCESS	23576	DDAH1	dimethylarginine dimethylaminohydrolase 1	2.68367	0.011911
GO_ORGANONITROGEN_COMPOUND_METABOLIC_PROCESS	6584	SLC22A5	solute carrier family 22 (organic cation/carnitine transporter), member 5	2.19767	0.00263368
GO_ORGANONITROGEN_COMPOUND_METABOLIC_PROCESS	4199	ME1	malic enzyme 1, NADP(+)-dependent, cytosolic	1.98158	0.0424975
GO_ORGANONITROGEN_COMPOUND_METABOLIC_PROCESS	7412	VCAM1	vascular cell adhesion molecule 1	1.66558	0.00324484
GO_ORGANONITROGEN_COMPOUND_METABOLIC_PROCESS	4953	ODC1	ornithine decarboxylase 1	1.62416	0.00584339
GO_ORGANONITROGEN_COMPOUND_METABOLIC_PROCESS	2941	GSTA4	glutathione S-transferase alpha 4	1.59347	0.049026
GO_ORGANONITROGEN_COMPOUND_METABOLIC_PROCESS	54677	CROT	carnitine O-octanoyltransferase	1.87563	0.000840794
GO_ORGANONITROGEN_COMPOUND_METABOLIC_PROCESS	283459	GATC	glutamyl-tRNA(Gln) amidotransferase, subunit C homolog (bacterial)	1.57923	0.00814744
GO_ORGANONITROGEN_COMPOUND_METABOLIC_PROCESS	2944	GSTM1	glutathione S-transferase mu 1	1.53353	0.0245594
GO_ORGANONITROGEN_COMPOUND_METABOLIC_PROCESS	125061	AFMID	arylformamidase	2.05169	0.00261766
GO_ORGANONITROGEN_COMPOUND_METABOLIC_PROCESS	10400	PEMT	phosphatidylethanolamine N-methyltransferase	1.51585	0.0193472
GO_ORGANONITROGEN_COMPOUND_METABOLIC_PROCESS	53354	PANK1	pantothenate kinase 1	1.50012	0.00261402
GO_ORGANONITROGEN_COMPOUND_METABOLIC_PROCESS	2940	GSTA3	glutathione S-transferase alpha 3	1.75395	0.0010179
GO_ORGANONITROGEN_COMPOUND_METABOLIC_PROCESS	2531	KDSR	3-ketodihydrosphingosine reductase	1.50092	0.00438066
GO_ORGANONITROGEN_COMPOUND_METABOLIC_PROCESS	283927	NUDT7	nudix (nucleoside diphosphate linked moiety X)-type motif 7	-2.17292	0.0458252
GO_ORGANONITROGEN_COMPOUND_METABOLIC_PROCESS	8876	VNN1	vanin 1	3.1305	0.000774131
GO_ORGANONITROGEN_COMPOUND_METABOLIC_PROCESS	3156	HMGCR	3-hydroxy-3-methylglutaryl-CoA reductase	-1.61115	0.0191748
GO_ORGANONITROGEN_COMPOUND_METABOLIC_PROCESS	1807	DPYS	dihydropyrimidinase	1.53281	0.00564242
GO_ORGANONITROGEN_COMPOUND_METABOLIC_PROCESS	9446	GSTO1	glutathione S-transferase omega 1	1.52302	0.00912031
GO_ORGANONITROGEN_COMPOUND_METABOLIC_PROCESS	2356	FPGS	folylpolyglutamate synthase	1.56811	0.000276656
GO_ORGANONITROGEN_COMPOUND_METABOLIC_PROCESS	8869	ST3GAL5	ST3 beta-galactoside alpha-2,3-sialyltransferase 5	2.04168	0.000344308
GO_ORGANONITROGEN_COMPOUND_METABOLIC_PROCESS	34	ACADM	acyl-CoA dehydrogenase, C-4 to C-12 straight chain	1.99474	0.000454357
GO_ORGANONITROGEN_COMPOUND_METABOLIC_PROCESS	2950	GSTP1	glutathione S-transferase pi 1	1.63912	0.0200483
GO_ORGANONITROGEN_COMPOUND_METABOLIC_PROCESS	51380	CSAD	cysteine sulfinic acid decarboxylase	1.73646	0.0117777
GO_ORGANONITROGEN_COMPOUND_METABOLIC_PROCESS	435	ASL	argininosuccinate lyase	1.53763	0.0277105
GO_ORGANONITROGEN_COMPOUND_METABOLIC_PROCESS	1384	CRAT	carnitine O-acetyltransferase	2.85378	0.00285356
GO_ORGANONITROGEN_COMPOUND_METABOLIC_PROCESS	2729	GCLC	glutamate-cysteine ligase, catalytic subunit	1.91732	0.0112782
GO_ORGANONITROGEN_COMPOUND_METABOLIC_PROCESS	5444	PON1	paraoxonase 1	1.51404	0.00152714
GO_ORGANONITROGEN_COMPOUND_METABOLIC_PROCESS	4969	OGN	osteoglycin	1.73328	0.024935
GO_ORGANONITROGEN_COMPOUND_METABOLIC_PROCESS	1371	CPOX	coproporphyrinogen oxidase	1.91579	0.000180559
GO_ORGANONITROGEN_COMPOUND_METABOLIC_PROCESS	2984	GUCY2C	guanylate cyclase 2C (heat stable enterotoxin receptor)	-1.67592	0.0313742
GO_ORGANONITROGEN_COMPOUND_METABOLIC_PROCESS	80315	CPEB4	cytoplasmic polyadenylation element binding protein 4	1.71331	0.0137244
GO_ORGANONITROGEN_COMPOUND_METABOLIC_PROCESS	2171	FABP5	fatty acid binding protein 5 (psoriasis-associated)	-1.73529	0.00148123
GO_ORGANONITROGEN_COMPOUND_METABOLIC_PROCESS	10209	EIF1	eukaryotic translation initiation factor 1	1.56125	0.00263291
GO_ORGANONITROGEN_COMPOUND_METABOLIC_PROCESS	6391	SDHC	succinate dehydrogenase complex, subunit C, integral membrane protein, 15kDa	1.62795	0.00613126
GO_ORGANONITROGEN_COMPOUND_METABOLIC_PROCESS	1890	TYMP	thymidine phosphorylase	2.07655	0.0062045
GO_ORGANONITROGEN_COMPOUND_METABOLIC_PROCESS	9429	ABCG2	ATP-binding cassette, sub-family G (WHITE), member 2	1.80371	0.00152641
GO_ORGANONITROGEN_COMPOUND_METABOLIC_PROCESS	590	BCHE	butyrylcholinesterase	1.63658	0.000631726
GO_ORGANONITROGEN_COMPOUND_METABOLIC_PROCESS	10955	SERINC3	serine incorporator 3	1.76767	0.0036202
GO_ORGANONITROGEN_COMPOUND_METABOLIC_PROCESS	788	SLC25A20	solute carrier family 25 (carnitine/acylcarnitine translocase), member 20	2.22906	8.36687e-05
GO_ORGANONITROGEN_COMPOUND_METABOLIC_PROCESS	847	CAT	catalase	1.60446	0.00171348
GO_ORGANONITROGEN_COMPOUND_METABOLIC_PROCESS	2731	GLDC	glycine dehydrogenase (decarboxylating)	2.24637	0.000863899
GO_ORGANONITROGEN_COMPOUND_METABOLIC_PROCESS	11185	INMT	indolethylamine N-methyltransferase	2.2319	0.0360656
GO_ORGANONITROGEN_COMPOUND_METABOLIC_PROCESS	33	ACADL	acyl-CoA dehydrogenase, long chain	1.72816	0.0028287
GO_ORGANONITROGEN_COMPOUND_METABOLIC_PROCESS	635	BHMT	betaine--homocysteine S-methyltransferase	1.70162	0.0343933
GO_ORGANONITROGEN_COMPOUND_METABOLIC_PROCESS	1050	CEBPA	CCAAT/enhancer binding protein (C/EBP), alpha	-1.51687	0.0147935
GO_ORGANONITROGEN_COMPOUND_METABOLIC_PROCESS	2326	FMO1	flavin containing monooxygenase 1	1.84427	0.000408961
GO_ORGANONITROGEN_COMPOUND_METABOLIC_PROCESS	4696	NDUFA3	NADH dehydrogenase (ubiquinone) 1 alpha subcomplex, 3, 9kDa	1.53457	0.0134308
GO_ORGANONITROGEN_COMPOUND_METABOLIC_PROCESS	2621	GAS6	growth arrest-specific 6	-2.46472	0.00347183
GO_ORGANONITROGEN_COMPOUND_METABOLIC_PROCESS	347735	SERINC2	serine incorporator 2	1.50214	0.0111738
GO_ORGANONITROGEN_COMPOUND_METABOLIC_PROCESS	8034	SLC25A16	solute carrier family 25 (mitochondrial carrier; Graves disease autoantigen), member 16	1.5307	0.00723438
GO_ORGANONITROGEN_COMPOUND_METABOLIC_PROCESS	3162	HMOX1	heme oxygenase (decycling) 1	1.56257	0.0232432
GO_ORGANONITROGEN_COMPOUND_METABOLIC_PROCESS	1119	CHKA	choline kinase alpha	2.68308	0.00340228
GO_ORGANONITROGEN_COMPOUND_METABOLIC_PROCESS	10894	LYVE1	lymphatic vessel endothelial hyaluronan receptor 1	1.67944	0.00115597
GO_ORGANONITROGEN_COMPOUND_METABOLIC_PROCESS	4715	NDUFB9	NADH dehydrogenase (ubiquinone) 1 beta subcomplex, 9, 22kDa	1.63818	0.0326675
GO_ORGANONITROGEN_COMPOUND_METABOLIC_PROCESS	51166	AADAT	aminoadipate aminotransferase	1.53724	0.0176972
GO_ORGANONITROGEN_COMPOUND_METABOLIC_PROCESS	1200	TPP1	tripeptidyl peptidase I	1.72256	0.0208322
GO_ORGANONITROGEN_COMPOUND_METABOLIC_PROCESS	6999	TDO2	tryptophan 2,3-dioxygenase	1.54417	0.00989422
GO_ORGANONITROGEN_COMPOUND_METABOLIC_PROCESS	2939	GSTA2	glutathione S-transferase alpha 2	2.34296	0.0223154
GO_ORGANONITROGEN_COMPOUND_METABOLIC_PROCESS	224	ALDH3A2	aldehyde dehydrogenase 3 family, member A2	3.5243	0.00086725
GO_ORGANONITROGEN_COMPOUND_METABOLIC_PROCESS	3931	LCAT	lecithin-cholesterol acyltransferase	1.64584	0.0152627
GO_ORGANONITROGEN_COMPOUND_METABOLIC_PROCESS	3034	HAL	histidine ammonia-lyase	1.89235	0.0132952
GO_ORGANONITROGEN_COMPOUND_METABOLIC_PROCESS	4311	MME	membrane metallo-endopeptidase	3.49531	0.000484026
GO_ORGANONITROGEN_COMPOUND_METABOLIC_PROCESS	55350	VNN3	vanin 3	1.81445	0.000890907
GO_ORGANONITROGEN_COMPOUND_METABOLIC_PROCESS	4129	MAOB	monoamine oxidase B	1.63753	0.00256494
GO_ORGANONITROGEN_COMPOUND_METABOLIC_PROCESS	38	ACAT1	acetyl-CoA acetyltransferase 1	1.77339	0.000855305
GO_ORGANONITROGEN_COMPOUND_METABOLIC_PROCESS	1491	CTH	cystathionase (cystathionine gamma-lyase)	1.64867	0.00943928
GO_ORGANONITROGEN_COMPOUND_METABOLIC_PROCESS	8424	BBOX1	butyrobetaine (gamma), 2-oxoglutarate dioxygenase (gamma-butyrobetaine hydroxylase) 1	1.59043	0.00889699
GO_ORGANONITROGEN_COMPOUND_METABOLIC_PROCESS	4329	ALDH6A1	aldehyde dehydrogenase 6 family, member A1	1.55718	0.0130025
GO_ORGANONITROGEN_COMPOUND_METABOLIC_PROCESS	4524	MTHFR	methylenetetrahydrofolate reductase (NAD(P)H)	1.66844	0.0183477
GO_ORGANONITROGEN_COMPOUND_METABOLIC_PROCESS	3312	HSPA8	heat shock 70kDa protein 8	1.5283	0.00463497
GO_ORGANONITROGEN_COMPOUND_METABOLIC_PROCESS	1576	CYP3A4	cytochrome P450, family 3, subfamily A, polypeptide 4	2.18741	0.000111938
GO_LIPID_CATABOLIC_PROCESS	7363	UGT2B4	UDP glucuronosyltransferase 2 family, polypeptide B4	1.69942	0.0412316
GO_LIPID_CATABOLIC_PROCESS	1962	EHHADH	enoyl-CoA, hydratase/3-hydroxyacyl CoA dehydrogenase	9.64907	0.000126974
GO_LIPID_CATABOLIC_PROCESS	57104	PNPLA2	patatin-like phospholipase domain containing 2	1.81129	0.022903
GO_LIPID_CATABOLIC_PROCESS	51170	HSD17B11	hydroxysteroid (17-beta) dehydrogenase 11	2.21898	0.00142
GO_LIPID_CATABOLIC_PROCESS	1576	CYP3A4	cytochrome P450, family 3, subfamily A, polypeptide 4	2.18741	0.000111938
GO_LIPID_CATABOLIC_PROCESS	1376	CPT2	carnitine palmitoyltransferase 2	2.1735	0.00144014
GO_LIPID_CATABOLIC_PROCESS	3988	LIPA	lipase A, lysosomal acid, cholesterol esterase	1.61684	0.00596293
GO_LIPID_CATABOLIC_PROCESS	224	ALDH3A2	aldehyde dehydrogenase 3 family, member A2	3.5243	0.00086725
GO_LIPID_CATABOLIC_PROCESS	5825	ABCD3	ATP-binding cassette, sub-family D (ALD), member 3	1.6066	0.00182228
GO_LIPID_CATABOLIC_PROCESS	3030	HADHA	hydroxyacyl-CoA dehydrogenase/3-ketoacyl-CoA thiolase/enoyl-CoA hydratase (trifunctional protein), alpha subunit	1.54394	0.000306471
GO_LIPID_CATABOLIC_PROCESS	2171	FABP5	fatty acid binding protein 5 (psoriasis-associated)	-1.73529	0.00148123
GO_LIPID_CATABOLIC_PROCESS	51302	CYP39A1	cytochrome P450, family 39, subfamily A, polypeptide 1	2.42464	0.00251403
GO_LIPID_CATABOLIC_PROCESS	10455	ECI2	enoyl-CoA delta isomerase 2	1.74498	0.00178871
GO_LIPID_CATABOLIC_PROCESS	11343	MGLL	monoglyceride lipase	1.86235	0.00245045
GO_LIPID_CATABOLIC_PROCESS	2110	ETFDH	electron-transferring-flavoprotein dehydrogenase	1.79156	0.00020707
GO_LIPID_CATABOLIC_PROCESS	3032	HADHB	hydroxyacyl-CoA dehydrogenase/3-ketoacyl-CoA thiolase/enoyl-CoA hydratase (trifunctional protein), beta subunit	1.92885	0.000229025
GO_LIPID_CATABOLIC_PROCESS	1666	DECR1	2,4-dienoyl CoA reductase 1, mitochondrial	1.7845	0.000543546
GO_LIPID_CATABOLIC_PROCESS	1375	CPT1B	carnitine palmitoyltransferase 1B (muscle)	1.50418	0.0301416
GO_LIPID_CATABOLIC_PROCESS	27329	ANGPTL3	angiopoietin-like 3	1.50328	0.00531285
GO_LIPID_CATABOLIC_PROCESS	84129	ACAD11	acyl-CoA dehydrogenase family, member 11	1.67146	0.000646651
GO_LIPID_CATABOLIC_PROCESS	33	ACADL	acyl-CoA dehydrogenase, long chain	1.72816	0.0028287
GO_LIPID_CATABOLIC_PROCESS	3033	HADH	hydroxyacyl-CoA dehydrogenase	1.52063	0.000393585
GO_LIPID_CATABOLIC_PROCESS	3295	HSD17B4	hydroxysteroid (17-beta) dehydrogenase 4	1.58035	0.000403005
GO_LIPID_CATABOLIC_PROCESS	26061	HACL1	2-hydroxyacyl-CoA lyase 1	2.10651	0.000775308
GO_LIPID_CATABOLIC_PROCESS	51	ACOX1	acyl-CoA oxidase 1, palmitoyl	1.66627	0.00242207
GO_LIPID_CATABOLIC_PROCESS	57406	ABHD6	abhydrolase domain containing 6	2.36925	0.00436045
GO_LIPID_CATABOLIC_PROCESS	23259	DDHD2	DDHD domain containing 2	1.6491	0.0163086
GO_LIPID_CATABOLIC_PROCESS	1384	CRAT	carnitine O-acetyltransferase	2.85378	0.00285356
GO_LIPID_CATABOLIC_PROCESS	34	ACADM	acyl-CoA dehydrogenase, C-4 to C-12 straight chain	1.99474	0.000454357
GO_LIPID_CATABOLIC_PROCESS	1891	ECH1	enoyl CoA hydratase 1, peroxisomal	1.6658	0.00260057
GO_LIPID_CATABOLIC_PROCESS	1632	ECI1	enoyl-CoA delta isomerase 1	1.7211	0.00210442
GO_LIPID_CATABOLIC_PROCESS	225	ABCD2	ATP-binding cassette, sub-family D (ALD), member 2	1.80682	0.0319243
GO_LIPID_CATABOLIC_PROCESS	54677	CROT	carnitine O-octanoyltransferase	1.87563	0.000840794
GO_LIPID_OXIDATION	1891	ECH1	enoyl CoA hydratase 1, peroxisomal	1.6658	0.00260057
GO_LIPID_OXIDATION	1632	ECI1	enoyl-CoA delta isomerase 1	1.7211	0.00210442
GO_LIPID_OXIDATION	225	ABCD2	ATP-binding cassette, sub-family D (ALD), member 2	1.80682	0.0319243
GO_LIPID_OXIDATION	54677	CROT	carnitine O-octanoyltransferase	1.87563	0.000840794
GO_LIPID_OXIDATION	3033	HADH	hydroxyacyl-CoA dehydrogenase	1.52063	0.000393585
GO_LIPID_OXIDATION	3295	HSD17B4	hydroxysteroid (17-beta) dehydrogenase 4	1.58035	0.000403005
GO_LIPID_OXIDATION	1384	CRAT	carnitine O-acetyltransferase	2.85378	0.00285356
GO_LIPID_OXIDATION	51	ACOX1	acyl-CoA oxidase 1, palmitoyl	1.66627	0.00242207
GO_LIPID_OXIDATION	26061	HACL1	2-hydroxyacyl-CoA lyase 1	2.10651	0.000775308
GO_LIPID_OXIDATION	34	ACADM	acyl-CoA dehydrogenase, C-4 to C-12 straight chain	1.99474	0.000454357
GO_LIPID_OXIDATION	5825	ABCD3	ATP-binding cassette, sub-family D (ALD), member 3	1.6066	0.00182228
GO_LIPID_OXIDATION	3030	HADHA	hydroxyacyl-CoA dehydrogenase/3-ketoacyl-CoA thiolase/enoyl-CoA hydratase (trifunctional protein), alpha subunit	1.54394	0.000306471
GO_LIPID_OXIDATION	2110	ETFDH	electron-transferring-flavoprotein dehydrogenase	1.79156	0.00020707
GO_LIPID_OXIDATION	10455	ECI2	enoyl-CoA delta isomerase 2	1.74498	0.00178871
GO_LIPID_OXIDATION	3032	HADHB	hydroxyacyl-CoA dehydrogenase/3-ketoacyl-CoA thiolase/enoyl-CoA hydratase (trifunctional protein), beta subunit	1.92885	0.000229025
GO_LIPID_OXIDATION	1375	CPT1B	carnitine palmitoyltransferase 1B (muscle)	1.50418	0.0301416
GO_LIPID_OXIDATION	1666	DECR1	2,4-dienoyl CoA reductase 1, mitochondrial	1.7845	0.000543546
GO_LIPID_OXIDATION	33	ACADL	acyl-CoA dehydrogenase, long chain	1.72816	0.0028287
GO_LIPID_OXIDATION	84129	ACAD11	acyl-CoA dehydrogenase family, member 11	1.67146	0.000646651
GO_LIPID_OXIDATION	1962	EHHADH	enoyl-CoA, hydratase/3-hydroxyacyl CoA dehydrogenase	9.64907	0.000126974
GO_LIPID_OXIDATION	1376	CPT2	carnitine palmitoyltransferase 2	2.1735	0.00144014
GO_LIPID_OXIDATION	224	ALDH3A2	aldehyde dehydrogenase 3 family, member A2	3.5243	0.00086725
GO_FATTY_ACID_BETA_OXIDATION	84129	ACAD11	acyl-CoA dehydrogenase family, member 11	1.67146	0.000646651
GO_FATTY_ACID_BETA_OXIDATION	33	ACADL	acyl-CoA dehydrogenase, long chain	1.72816	0.0028287
GO_FATTY_ACID_BETA_OXIDATION	1666	DECR1	2,4-dienoyl CoA reductase 1, mitochondrial	1.7845	0.000543546
GO_FATTY_ACID_BETA_OXIDATION	1375	CPT1B	carnitine palmitoyltransferase 1B (muscle)	1.50418	0.0301416
GO_FATTY_ACID_BETA_OXIDATION	3032	HADHB	hydroxyacyl-CoA dehydrogenase/3-ketoacyl-CoA thiolase/enoyl-CoA hydratase (trifunctional protein), beta subunit	1.92885	0.000229025
GO_FATTY_ACID_BETA_OXIDATION	10455	ECI2	enoyl-CoA delta isomerase 2	1.74498	0.00178871
GO_FATTY_ACID_BETA_OXIDATION	2110	ETFDH	electron-transferring-flavoprotein dehydrogenase	1.79156	0.00020707
GO_FATTY_ACID_BETA_OXIDATION	3030	HADHA	hydroxyacyl-CoA dehydrogenase/3-ketoacyl-CoA thiolase/enoyl-CoA hydratase (trifunctional protein), alpha subunit	1.54394	0.000306471
GO_FATTY_ACID_BETA_OXIDATION	5825	ABCD3	ATP-binding cassette, sub-family D (ALD), member 3	1.6066	0.00182228
GO_FATTY_ACID_BETA_OXIDATION	1376	CPT2	carnitine palmitoyltransferase 2	2.1735	0.00144014
GO_FATTY_ACID_BETA_OXIDATION	1962	EHHADH	enoyl-CoA, hydratase/3-hydroxyacyl CoA dehydrogenase	9.64907	0.000126974
GO_FATTY_ACID_BETA_OXIDATION	54677	CROT	carnitine O-octanoyltransferase	1.87563	0.000840794
GO_FATTY_ACID_BETA_OXIDATION	225	ABCD2	ATP-binding cassette, sub-family D (ALD), member 2	1.80682	0.0319243
GO_FATTY_ACID_BETA_OXIDATION	1632	ECI1	enoyl-CoA delta isomerase 1	1.7211	0.00210442
GO_FATTY_ACID_BETA_OXIDATION	1891	ECH1	enoyl CoA hydratase 1, peroxisomal	1.6658	0.00260057
GO_FATTY_ACID_BETA_OXIDATION	34	ACADM	acyl-CoA dehydrogenase, C-4 to C-12 straight chain	1.99474	0.000454357
GO_FATTY_ACID_BETA_OXIDATION	51	ACOX1	acyl-CoA oxidase 1, palmitoyl	1.66627	0.00242207
GO_FATTY_ACID_BETA_OXIDATION	1384	CRAT	carnitine O-acetyltransferase	2.85378	0.00285356
GO_FATTY_ACID_BETA_OXIDATION	3295	HSD17B4	hydroxysteroid (17-beta) dehydrogenase 4	1.58035	0.000403005
GO_FATTY_ACID_BETA_OXIDATION	3033	HADH	hydroxyacyl-CoA dehydrogenase	1.52063	0.000393585
GO_FATTY_ACID_CATABOLIC_PROCESS	3030	HADHA	hydroxyacyl-CoA dehydrogenase/3-ketoacyl-CoA thiolase/enoyl-CoA hydratase (trifunctional protein), alpha subunit	1.54394	0.000306471
GO_FATTY_ACID_CATABOLIC_PROCESS	5825	ABCD3	ATP-binding cassette, sub-family D (ALD), member 3	1.6066	0.00182228
GO_FATTY_ACID_CATABOLIC_PROCESS	33	ACADL	acyl-CoA dehydrogenase, long chain	1.72816	0.0028287
GO_FATTY_ACID_CATABOLIC_PROCESS	84129	ACAD11	acyl-CoA dehydrogenase family, member 11	1.67146	0.000646651
GO_FATTY_ACID_CATABOLIC_PROCESS	1666	DECR1	2,4-dienoyl CoA reductase 1, mitochondrial	1.7845	0.000543546
GO_FATTY_ACID_CATABOLIC_PROCESS	1375	CPT1B	carnitine palmitoyltransferase 1B (muscle)	1.50418	0.0301416
GO_FATTY_ACID_CATABOLIC_PROCESS	3032	HADHB	hydroxyacyl-CoA dehydrogenase/3-ketoacyl-CoA thiolase/enoyl-CoA hydratase (trifunctional protein), beta subunit	1.92885	0.000229025
GO_FATTY_ACID_CATABOLIC_PROCESS	10455	ECI2	enoyl-CoA delta isomerase 2	1.74498	0.00178871
GO_FATTY_ACID_CATABOLIC_PROCESS	2110	ETFDH	electron-transferring-flavoprotein dehydrogenase	1.79156	0.00020707
GO_FATTY_ACID_CATABOLIC_PROCESS	1962	EHHADH	enoyl-CoA, hydratase/3-hydroxyacyl CoA dehydrogenase	9.64907	0.000126974
GO_FATTY_ACID_CATABOLIC_PROCESS	224	ALDH3A2	aldehyde dehydrogenase 3 family, member A2	3.5243	0.00086725
GO_FATTY_ACID_CATABOLIC_PROCESS	1376	CPT2	carnitine palmitoyltransferase 2	2.1735	0.00144014
GO_FATTY_ACID_CATABOLIC_PROCESS	1632	ECI1	enoyl-CoA delta isomerase 1	1.7211	0.00210442
GO_FATTY_ACID_CATABOLIC_PROCESS	1891	ECH1	enoyl CoA hydratase 1, peroxisomal	1.6658	0.00260057
GO_FATTY_ACID_CATABOLIC_PROCESS	54677	CROT	carnitine O-octanoyltransferase	1.87563	0.000840794
GO_FATTY_ACID_CATABOLIC_PROCESS	225	ABCD2	ATP-binding cassette, sub-family D (ALD), member 2	1.80682	0.0319243
GO_FATTY_ACID_CATABOLIC_PROCESS	3033	HADH	hydroxyacyl-CoA dehydrogenase	1.52063	0.000393585
GO_FATTY_ACID_CATABOLIC_PROCESS	34	ACADM	acyl-CoA dehydrogenase, C-4 to C-12 straight chain	1.99474	0.000454357
GO_FATTY_ACID_CATABOLIC_PROCESS	51	ACOX1	acyl-CoA oxidase 1, palmitoyl	1.66627	0.00242207
GO_FATTY_ACID_CATABOLIC_PROCESS	26061	HACL1	2-hydroxyacyl-CoA lyase 1	2.10651	0.000775308
GO_FATTY_ACID_CATABOLIC_PROCESS	1384	CRAT	carnitine O-acetyltransferase	2.85378	0.00285356
GO_FATTY_ACID_CATABOLIC_PROCESS	3295	HSD17B4	hydroxysteroid (17-beta) dehydrogenase 4	1.58035	0.000403005
GO_CELLULAR_LIPID_CATABOLIC_PROCESS	11343	MGLL	monoglyceride lipase	1.86235	0.00245045
GO_CELLULAR_LIPID_CATABOLIC_PROCESS	2110	ETFDH	electron-transferring-flavoprotein dehydrogenase	1.79156	0.00020707
GO_CELLULAR_LIPID_CATABOLIC_PROCESS	10455	ECI2	enoyl-CoA delta isomerase 2	1.74498	0.00178871
GO_CELLULAR_LIPID_CATABOLIC_PROCESS	3032	HADHB	hydroxyacyl-CoA dehydrogenase/3-ketoacyl-CoA thiolase/enoyl-CoA hydratase (trifunctional protein), beta subunit	1.92885	0.000229025
GO_CELLULAR_LIPID_CATABOLIC_PROCESS	1375	CPT1B	carnitine palmitoyltransferase 1B (muscle)	1.50418	0.0301416
GO_CELLULAR_LIPID_CATABOLIC_PROCESS	1666	DECR1	2,4-dienoyl CoA reductase 1, mitochondrial	1.7845	0.000543546
GO_CELLULAR_LIPID_CATABOLIC_PROCESS	33	ACADL	acyl-CoA dehydrogenase, long chain	1.72816	0.0028287
GO_CELLULAR_LIPID_CATABOLIC_PROCESS	84129	ACAD11	acyl-CoA dehydrogenase family, member 11	1.67146	0.000646651
GO_CELLULAR_LIPID_CATABOLIC_PROCESS	27329	ANGPTL3	angiopoietin-like 3	1.50328	0.00531285
GO_CELLULAR_LIPID_CATABOLIC_PROCESS	5825	ABCD3	ATP-binding cassette, sub-family D (ALD), member 3	1.6066	0.00182228
GO_CELLULAR_LIPID_CATABOLIC_PROCESS	3030	HADHA	hydroxyacyl-CoA dehydrogenase/3-ketoacyl-CoA thiolase/enoyl-CoA hydratase (trifunctional protein), alpha subunit	1.54394	0.000306471
GO_CELLULAR_LIPID_CATABOLIC_PROCESS	2171	FABP5	fatty acid binding protein 5 (psoriasis-associated)	-1.73529	0.00148123
GO_CELLULAR_LIPID_CATABOLIC_PROCESS	1376	CPT2	carnitine palmitoyltransferase 2	2.1735	0.00144014
GO_CELLULAR_LIPID_CATABOLIC_PROCESS	224	ALDH3A2	aldehyde dehydrogenase 3 family, member A2	3.5243	0.00086725
GO_CELLULAR_LIPID_CATABOLIC_PROCESS	1962	EHHADH	enoyl-CoA, hydratase/3-hydroxyacyl CoA dehydrogenase	9.64907	0.000126974
GO_CELLULAR_LIPID_CATABOLIC_PROCESS	57104	PNPLA2	patatin-like phospholipase domain containing 2	1.81129	0.022903
GO_CELLULAR_LIPID_CATABOLIC_PROCESS	225	ABCD2	ATP-binding cassette, sub-family D (ALD), member 2	1.80682	0.0319243
GO_CELLULAR_LIPID_CATABOLIC_PROCESS	54677	CROT	carnitine O-octanoyltransferase	1.87563	0.000840794
GO_CELLULAR_LIPID_CATABOLIC_PROCESS	1891	ECH1	enoyl CoA hydratase 1, peroxisomal	1.6658	0.00260057
GO_CELLULAR_LIPID_CATABOLIC_PROCESS	1632	ECI1	enoyl-CoA delta isomerase 1	1.7211	0.00210442
GO_CELLULAR_LIPID_CATABOLIC_PROCESS	3295	HSD17B4	hydroxysteroid (17-beta) dehydrogenase 4	1.58035	0.000403005
GO_CELLULAR_LIPID_CATABOLIC_PROCESS	1384	CRAT	carnitine O-acetyltransferase	2.85378	0.00285356
GO_CELLULAR_LIPID_CATABOLIC_PROCESS	57406	ABHD6	abhydrolase domain containing 6	2.36925	0.00436045
GO_CELLULAR_LIPID_CATABOLIC_PROCESS	51	ACOX1	acyl-CoA oxidase 1, palmitoyl	1.66627	0.00242207
GO_CELLULAR_LIPID_CATABOLIC_PROCESS	26061	HACL1	2-hydroxyacyl-CoA lyase 1	2.10651	0.000775308
GO_CELLULAR_LIPID_CATABOLIC_PROCESS	34	ACADM	acyl-CoA dehydrogenase, C-4 to C-12 straight chain	1.99474	0.000454357
GO_CELLULAR_LIPID_CATABOLIC_PROCESS	3033	HADH	hydroxyacyl-CoA dehydrogenase	1.52063	0.000393585
GO_LIPID_BIOSYNTHETIC_PROCESS	6713	SQLE	squalene epoxidase	-2.98702	0.00195107
GO_LIPID_BIOSYNTHETIC_PROCESS	23259	DDHD2	DDHD domain containing 2	1.6491	0.0163086
GO_LIPID_BIOSYNTHETIC_PROCESS	161247	FITM1	fat storage-inducing transmembrane protein 1	1.84418	0.00727275
GO_LIPID_BIOSYNTHETIC_PROCESS	128486	FITM2	fat storage-inducing transmembrane protein 2	1.79922	0.00138607
GO_LIPID_BIOSYNTHETIC_PROCESS	3295	HSD17B4	hydroxysteroid (17-beta) dehydrogenase 4	1.58035	0.000403005
GO_LIPID_BIOSYNTHETIC_PROCESS	2531	KDSR	3-ketodihydrosphingosine reductase	1.50092	0.00438066
GO_LIPID_BIOSYNTHETIC_PROCESS	3156	HMGCR	3-hydroxy-3-methylglutaryl-CoA reductase	-1.61115	0.0191748
GO_LIPID_BIOSYNTHETIC_PROCESS	1595	CYP51A1	cytochrome P450, family 51, subfamily A, polypeptide 1	-2.46406	0.00328032
GO_LIPID_BIOSYNTHETIC_PROCESS	8869	ST3GAL5	ST3 beta-galactoside alpha-2,3-sialyltransferase 5	2.04168	0.000344308
GO_LIPID_BIOSYNTHETIC_PROCESS	3158	HMGCS2	3-hydroxy-3-methylglutaryl-CoA synthase 2 (mitochondrial)	1.69489	0.00079222
GO_LIPID_BIOSYNTHETIC_PROCESS	283	ANG	angiogenin, ribonuclease, RNase A family, 5	-2.27736	0.0190897
GO_LIPID_BIOSYNTHETIC_PROCESS	10555	AGPAT2	1-acylglycerol-3-phosphate O-acyltransferase 2 (lysophosphatidic acid acyltransferase, beta)	1.89944	0.00515849
GO_LIPID_BIOSYNTHETIC_PROCESS	26063	DECR2	2,4-dienoyl CoA reductase 2, peroxisomal	1.90336	0.004052
GO_LIPID_BIOSYNTHETIC_PROCESS	10400	PEMT	phosphatidylethanolamine N-methyltransferase	1.51585	0.0193472
GO_LIPID_BIOSYNTHETIC_PROCESS	3422	IDI1	isopentenyl-diphosphate delta isomerase 1	-3.14131	0.000814091
GO_LIPID_BIOSYNTHETIC_PROCESS	1718	DHCR24	24-dehydrocholesterol reductase	-1.58136	0.0182725
GO_LIPID_BIOSYNTHETIC_PROCESS	51477	ISYNA1	inositol-3-phosphate synthase 1	-2.42543	0.00551362
GO_LIPID_BIOSYNTHETIC_PROCESS	3290	HSD11B1	hydroxysteroid (11-beta) dehydrogenase 1	1.5875	0.00360464
GO_LIPID_BIOSYNTHETIC_PROCESS	2710	GK	glycerol kinase	1.6816	0.0019605
GO_LIPID_BIOSYNTHETIC_PROCESS	224	ALDH3A2	aldehyde dehydrogenase 3 family, member A2	3.5243	0.00086725
GO_LIPID_BIOSYNTHETIC_PROCESS	3931	LCAT	lecithin-cholesterol acyltransferase	1.64584	0.0152627
GO_LIPID_BIOSYNTHETIC_PROCESS	51170	HSD17B11	hydroxysteroid (17-beta) dehydrogenase 11	2.21898	0.00142
GO_LIPID_BIOSYNTHETIC_PROCESS	51141	INSIG2	insulin induced gene 2	4.51312	0.000275459
GO_LIPID_BIOSYNTHETIC_PROCESS	1576	CYP3A4	cytochrome P450, family 3, subfamily A, polypeptide 4	2.18741	0.000111938
GO_LIPID_BIOSYNTHETIC_PROCESS	873	CBR1	carbonyl reductase 1	1.60544	0.00024507
GO_LIPID_BIOSYNTHETIC_PROCESS	2224	FDPS	farnesyl diphosphate synthase	-2.6974	0.00172661
GO_LIPID_BIOSYNTHETIC_PROCESS	1119	CHKA	choline kinase alpha	2.68308	0.00340228
GO_LIPID_BIOSYNTHETIC_PROCESS	8660	IRS2	insulin receptor substrate 2	1.76076	0.0410914
GO_LIPID_BIOSYNTHETIC_PROCESS	1582	CYP8B1	cytochrome P450, family 8, subfamily B, polypeptide 1	3.55399	0.00785468
GO_LIPID_BIOSYNTHETIC_PROCESS	2180	ACSL1	acyl-CoA synthetase long-chain family member 1	3.24665	0.00047773
GO_LIPID_BIOSYNTHETIC_PROCESS	392636	AGMO	alkylglycerol monooxygenase	1.78901	0.00121152
GO_LIPID_BIOSYNTHETIC_PROCESS	60481	ELOVL5	ELOVL fatty acid elongase 5	2.31279	0.00910325
GO_LIPID_BIOSYNTHETIC_PROCESS	83401	ELOVL3	ELOVL fatty acid elongase 3	6.40236	0.00054127
GO_LIPID_BIOSYNTHETIC_PROCESS	6296	ACSM3	acyl-CoA synthetase medium-chain family member 3	1.55279	0.0151525
GO_LIPID_BIOSYNTHETIC_PROCESS	50814	NSDHL	NAD(P) dependent steroid dehydrogenase-like	-2.14416	0.00831368
GO_LIPID_BIOSYNTHETIC_PROCESS	11343	MGLL	monoglyceride lipase	1.86235	0.00245045
GO_LIPID_BIOSYNTHETIC_PROCESS	51302	CYP39A1	cytochrome P450, family 39, subfamily A, polypeptide 1	2.42464	0.00251403
GO_LIPID_BIOSYNTHETIC_PROCESS	2171	FABP5	fatty acid binding protein 5 (psoriasis-associated)	-1.73529	0.00148123
GO_LIPID_BIOSYNTHETIC_PROCESS	972	CD74	CD74 molecule, major histocompatibility complex, class II invariant chain	2.00907	0.00446325
GO_LIPID_BIOSYNTHETIC_PROCESS	5825	ABCD3	ATP-binding cassette, sub-family D (ALD), member 3	1.6066	0.00182228
GO_LIPID_BIOSYNTHETIC_PROCESS	128869	PIGU	phosphatidylinositol glycan anchor biosynthesis, class U	1.72966	0.00213706
GO_ORGANIC_HYDROXY_COMPOUND_METABOLIC_PROCESS	1576	CYP3A4	cytochrome P450, family 3, subfamily A, polypeptide 4	2.18741	0.000111938
GO_ORGANIC_HYDROXY_COMPOUND_METABOLIC_PROCESS	51141	INSIG2	insulin induced gene 2	4.51312	0.000275459
GO_ORGANIC_HYDROXY_COMPOUND_METABOLIC_PROCESS	2820	GPD2	glycerol-3-phosphate dehydrogenase 2 (mitochondrial)	1.58725	0.0356215
GO_ORGANIC_HYDROXY_COMPOUND_METABOLIC_PROCESS	8424	BBOX1	butyrobetaine (gamma), 2-oxoglutarate dioxygenase (gamma-butyrobetaine hydroxylase) 1	1.59043	0.00889699
GO_ORGANIC_HYDROXY_COMPOUND_METABOLIC_PROCESS	4129	MAOB	monoamine oxidase B	1.63753	0.00256494
GO_ORGANIC_HYDROXY_COMPOUND_METABOLIC_PROCESS	224	ALDH3A2	aldehyde dehydrogenase 3 family, member A2	3.5243	0.00086725
GO_ORGANIC_HYDROXY_COMPOUND_METABOLIC_PROCESS	3931	LCAT	lecithin-cholesterol acyltransferase	1.64584	0.0152627
GO_ORGANIC_HYDROXY_COMPOUND_METABOLIC_PROCESS	2710	GK	glycerol kinase	1.6816	0.0019605
GO_ORGANIC_HYDROXY_COMPOUND_METABOLIC_PROCESS	3988	LIPA	lipase A, lysosomal acid, cholesterol esterase	1.61684	0.00596293
GO_ORGANIC_HYDROXY_COMPOUND_METABOLIC_PROCESS	1582	CYP8B1	cytochrome P450, family 8, subfamily B, polypeptide 1	3.55399	0.00785468
GO_ORGANIC_HYDROXY_COMPOUND_METABOLIC_PROCESS	3953	LEPR	leptin receptor	1.63649	0.00281941
GO_ORGANIC_HYDROXY_COMPOUND_METABOLIC_PROCESS	1119	CHKA	choline kinase alpha	2.68308	0.00340228
GO_ORGANIC_HYDROXY_COMPOUND_METABOLIC_PROCESS	2224	FDPS	farnesyl diphosphate synthase	-2.6974	0.00172661
GO_ORGANIC_HYDROXY_COMPOUND_METABOLIC_PROCESS	50814	NSDHL	NAD(P) dependent steroid dehydrogenase-like	-2.14416	0.00831368
GO_ORGANIC_HYDROXY_COMPOUND_METABOLIC_PROCESS	54884	RETSAT	retinol saturase (all-trans-retinol 13,14-reductase)	4.89906	9.08576e-05
GO_ORGANIC_HYDROXY_COMPOUND_METABOLIC_PROCESS	1050	CEBPA	CCAAT/enhancer binding protein (C/EBP), alpha	-1.51687	0.0147935
GO_ORGANIC_HYDROXY_COMPOUND_METABOLIC_PROCESS	33	ACADL	acyl-CoA dehydrogenase, long chain	1.72816	0.0028287
GO_ORGANIC_HYDROXY_COMPOUND_METABOLIC_PROCESS	635	BHMT	betaine--homocysteine S-methyltransferase	1.70162	0.0343933
GO_ORGANIC_HYDROXY_COMPOUND_METABOLIC_PROCESS	27329	ANGPTL3	angiopoietin-like 3	1.50328	0.00531285
GO_ORGANIC_HYDROXY_COMPOUND_METABOLIC_PROCESS	847	CAT	catalase	1.60446	0.00171348
GO_ORGANIC_HYDROXY_COMPOUND_METABOLIC_PROCESS	590	BCHE	butyrylcholinesterase	1.63658	0.000631726
GO_ORGANIC_HYDROXY_COMPOUND_METABOLIC_PROCESS	2171	FABP5	fatty acid binding protein 5 (psoriasis-associated)	-1.73529	0.00148123
GO_ORGANIC_HYDROXY_COMPOUND_METABOLIC_PROCESS	51302	CYP39A1	cytochrome P450, family 39, subfamily A, polypeptide 1	2.42464	0.00251403
GO_ORGANIC_HYDROXY_COMPOUND_METABOLIC_PROCESS	3295	HSD17B4	hydroxysteroid (17-beta) dehydrogenase 4	1.58035	0.000403005
GO_ORGANIC_HYDROXY_COMPOUND_METABOLIC_PROCESS	5444	PON1	paraoxonase 1	1.51404	0.00152714
GO_ORGANIC_HYDROXY_COMPOUND_METABOLIC_PROCESS	1384	CRAT	carnitine O-acetyltransferase	2.85378	0.00285356
GO_ORGANIC_HYDROXY_COMPOUND_METABOLIC_PROCESS	6713	SQLE	squalene epoxidase	-2.98702	0.00195107
GO_ORGANIC_HYDROXY_COMPOUND_METABOLIC_PROCESS	34	ACADM	acyl-CoA dehydrogenase, C-4 to C-12 straight chain	1.99474	0.000454357
GO_ORGANIC_HYDROXY_COMPOUND_METABOLIC_PROCESS	1595	CYP51A1	cytochrome P450, family 51, subfamily A, polypeptide 1	-2.46406	0.00328032
GO_ORGANIC_HYDROXY_COMPOUND_METABOLIC_PROCESS	3156	HMGCR	3-hydroxy-3-methylglutaryl-CoA reductase	-1.61115	0.0191748
GO_ORGANIC_HYDROXY_COMPOUND_METABOLIC_PROCESS	25953	PNKD	paroxysmal nonkinesigenic dyskinesia	1.52536	0.00310289
GO_ORGANIC_HYDROXY_COMPOUND_METABOLIC_PROCESS	3422	IDI1	isopentenyl-diphosphate delta isomerase 1	-3.14131	0.000814091
GO_ORGANIC_HYDROXY_COMPOUND_METABOLIC_PROCESS	10400	PEMT	phosphatidylethanolamine N-methyltransferase	1.51585	0.0193472
GO_ORGANIC_HYDROXY_COMPOUND_METABOLIC_PROCESS	54677	CROT	carnitine O-octanoyltransferase	1.87563	0.000840794
GO_ORGANIC_HYDROXY_COMPOUND_METABOLIC_PROCESS	3158	HMGCS2	3-hydroxy-3-methylglutaryl-CoA synthase 2 (mitochondrial)	1.69489	0.00079222
GO_ORGANIC_HYDROXY_COMPOUND_METABOLIC_PROCESS	10901	DHRS4	dehydrogenase/reductase (SDR family) member 4	1.58677	0.00312422
GO_ORGANIC_HYDROXY_COMPOUND_METABOLIC_PROCESS	1718	DHCR24	24-dehydrocholesterol reductase	-1.58136	0.0182725
GO_ORGANIC_HYDROXY_COMPOUND_METABOLIC_PROCESS	51477	ISYNA1	inositol-3-phosphate synthase 1	-2.42543	0.00551362
GO_ORGANIC_HYDROXY_COMPOUND_METABOLIC_PROCESS	6584	SLC22A5	solute carrier family 22 (organic cation/carnitine transporter), member 5	2.19767	0.00263368
GO_MONOCARBOXYLIC_ACID_CATABOLIC_PROCESS	3295	HSD17B4	hydroxysteroid (17-beta) dehydrogenase 4	1.58035	0.000403005
GO_MONOCARBOXYLIC_ACID_CATABOLIC_PROCESS	51	ACOX1	acyl-CoA oxidase 1, palmitoyl	1.66627	0.00242207
GO_MONOCARBOXYLIC_ACID_CATABOLIC_PROCESS	26061	HACL1	2-hydroxyacyl-CoA lyase 1	2.10651	0.000775308
GO_MONOCARBOXYLIC_ACID_CATABOLIC_PROCESS	1384	CRAT	carnitine O-acetyltransferase	2.85378	0.00285356
GO_MONOCARBOXYLIC_ACID_CATABOLIC_PROCESS	34	ACADM	acyl-CoA dehydrogenase, C-4 to C-12 straight chain	1.99474	0.000454357
GO_MONOCARBOXYLIC_ACID_CATABOLIC_PROCESS	3033	HADH	hydroxyacyl-CoA dehydrogenase	1.52063	0.000393585
GO_MONOCARBOXYLIC_ACID_CATABOLIC_PROCESS	225	ABCD2	ATP-binding cassette, sub-family D (ALD), member 2	1.80682	0.0319243
GO_MONOCARBOXYLIC_ACID_CATABOLIC_PROCESS	54677	CROT	carnitine O-octanoyltransferase	1.87563	0.000840794
GO_MONOCARBOXYLIC_ACID_CATABOLIC_PROCESS	1891	ECH1	enoyl CoA hydratase 1, peroxisomal	1.6658	0.00260057
GO_MONOCARBOXYLIC_ACID_CATABOLIC_PROCESS	1632	ECI1	enoyl-CoA delta isomerase 1	1.7211	0.00210442
GO_MONOCARBOXYLIC_ACID_CATABOLIC_PROCESS	1376	CPT2	carnitine palmitoyltransferase 2	2.1735	0.00144014
GO_MONOCARBOXYLIC_ACID_CATABOLIC_PROCESS	224	ALDH3A2	aldehyde dehydrogenase 3 family, member A2	3.5243	0.00086725
GO_MONOCARBOXYLIC_ACID_CATABOLIC_PROCESS	1962	EHHADH	enoyl-CoA, hydratase/3-hydroxyacyl CoA dehydrogenase	9.64907	0.000126974
GO_MONOCARBOXYLIC_ACID_CATABOLIC_PROCESS	10455	ECI2	enoyl-CoA delta isomerase 2	1.74498	0.00178871
GO_MONOCARBOXYLIC_ACID_CATABOLIC_PROCESS	2110	ETFDH	electron-transferring-flavoprotein dehydrogenase	1.79156	0.00020707
GO_MONOCARBOXYLIC_ACID_CATABOLIC_PROCESS	3032	HADHB	hydroxyacyl-CoA dehydrogenase/3-ketoacyl-CoA thiolase/enoyl-CoA hydratase (trifunctional protein), beta subunit	1.92885	0.000229025
GO_MONOCARBOXYLIC_ACID_CATABOLIC_PROCESS	1666	DECR1	2,4-dienoyl CoA reductase 1, mitochondrial	1.7845	0.000543546
GO_MONOCARBOXYLIC_ACID_CATABOLIC_PROCESS	1375	CPT1B	carnitine palmitoyltransferase 1B (muscle)	1.50418	0.0301416
GO_MONOCARBOXYLIC_ACID_CATABOLIC_PROCESS	33	ACADL	acyl-CoA dehydrogenase, long chain	1.72816	0.0028287
GO_MONOCARBOXYLIC_ACID_CATABOLIC_PROCESS	84129	ACAD11	acyl-CoA dehydrogenase family, member 11	1.67146	0.000646651
GO_MONOCARBOXYLIC_ACID_CATABOLIC_PROCESS	5825	ABCD3	ATP-binding cassette, sub-family D (ALD), member 3	1.6066	0.00182228
GO_MONOCARBOXYLIC_ACID_CATABOLIC_PROCESS	3030	HADHA	hydroxyacyl-CoA dehydrogenase/3-ketoacyl-CoA thiolase/enoyl-CoA hydratase (trifunctional protein), alpha subunit	1.54394	0.000306471
GO_MONOCARBOXYLIC_ACID_CATABOLIC_PROCESS	51302	CYP39A1	cytochrome P450, family 39, subfamily A, polypeptide 1	2.42464	0.00251403
GO_SMALL_MOLECULE_BIOSYNTHETIC_PROCESS	1718	DHCR24	24-dehydrocholesterol reductase	-1.58136	0.0182725
GO_SMALL_MOLECULE_BIOSYNTHETIC_PROCESS	51477	ISYNA1	inositol-3-phosphate synthase 1	-2.42543	0.00551362
GO_SMALL_MOLECULE_BIOSYNTHETIC_PROCESS	26063	DECR2	2,4-dienoyl CoA reductase 2, peroxisomal	1.90336	0.004052
GO_SMALL_MOLECULE_BIOSYNTHETIC_PROCESS	3158	HMGCS2	3-hydroxy-3-methylglutaryl-CoA synthase 2 (mitochondrial)	1.69489	0.00079222
GO_SMALL_MOLECULE_BIOSYNTHETIC_PROCESS	3422	IDI1	isopentenyl-diphosphate delta isomerase 1	-3.14131	0.000814091
GO_SMALL_MOLECULE_BIOSYNTHETIC_PROCESS	10400	PEMT	phosphatidylethanolamine N-methyltransferase	1.51585	0.0193472
GO_SMALL_MOLECULE_BIOSYNTHETIC_PROCESS	9446	GSTO1	glutathione S-transferase omega 1	1.52302	0.00912031
GO_SMALL_MOLECULE_BIOSYNTHETIC_PROCESS	2356	FPGS	folylpolyglutamate synthase	1.56811	0.000276656
GO_SMALL_MOLECULE_BIOSYNTHETIC_PROCESS	3156	HMGCR	3-hydroxy-3-methylglutaryl-CoA reductase	-1.61115	0.0191748
GO_SMALL_MOLECULE_BIOSYNTHETIC_PROCESS	1595	CYP51A1	cytochrome P450, family 51, subfamily A, polypeptide 1	-2.46406	0.00328032
GO_SMALL_MOLECULE_BIOSYNTHETIC_PROCESS	6713	SQLE	squalene epoxidase	-2.98702	0.00195107
GO_SMALL_MOLECULE_BIOSYNTHETIC_PROCESS	34	ACADM	acyl-CoA dehydrogenase, C-4 to C-12 straight chain	1.99474	0.000454357
GO_SMALL_MOLECULE_BIOSYNTHETIC_PROCESS	3295	HSD17B4	hydroxysteroid (17-beta) dehydrogenase 4	1.58035	0.000403005
GO_SMALL_MOLECULE_BIOSYNTHETIC_PROCESS	435	ASL	argininosuccinate lyase	1.53763	0.0277105
GO_SMALL_MOLECULE_BIOSYNTHETIC_PROCESS	2171	FABP5	fatty acid binding protein 5 (psoriasis-associated)	-1.73529	0.00148123
GO_SMALL_MOLECULE_BIOSYNTHETIC_PROCESS	51302	CYP39A1	cytochrome P450, family 39, subfamily A, polypeptide 1	2.42464	0.00251403
GO_SMALL_MOLECULE_BIOSYNTHETIC_PROCESS	5825	ABCD3	ATP-binding cassette, sub-family D (ALD), member 3	1.6066	0.00182228
GO_SMALL_MOLECULE_BIOSYNTHETIC_PROCESS	1407	CRY1	cryptochrome 1 (photolyase-like)	2.34398	0.00040721
GO_SMALL_MOLECULE_BIOSYNTHETIC_PROCESS	972	CD74	CD74 molecule, major histocompatibility complex, class II invariant chain	2.00907	0.00446325
GO_SMALL_MOLECULE_BIOSYNTHETIC_PROCESS	60481	ELOVL5	ELOVL fatty acid elongase 5	2.31279	0.00910325
GO_SMALL_MOLECULE_BIOSYNTHETIC_PROCESS	635	BHMT	betaine--homocysteine S-methyltransferase	1.70162	0.0343933
GO_SMALL_MOLECULE_BIOSYNTHETIC_PROCESS	392636	AGMO	alkylglycerol monooxygenase	1.78901	0.00121152
GO_SMALL_MOLECULE_BIOSYNTHETIC_PROCESS	11343	MGLL	monoglyceride lipase	1.86235	0.00245045
GO_SMALL_MOLECULE_BIOSYNTHETIC_PROCESS	50814	NSDHL	NAD(P) dependent steroid dehydrogenase-like	-2.14416	0.00831368
GO_SMALL_MOLECULE_BIOSYNTHETIC_PROCESS	83401	ELOVL3	ELOVL fatty acid elongase 3	6.40236	0.00054127
GO_SMALL_MOLECULE_BIOSYNTHETIC_PROCESS	6296	ACSM3	acyl-CoA synthetase medium-chain family member 3	1.55279	0.0151525
GO_SMALL_MOLECULE_BIOSYNTHETIC_PROCESS	1119	CHKA	choline kinase alpha	2.68308	0.00340228
GO_SMALL_MOLECULE_BIOSYNTHETIC_PROCESS	2224	FDPS	farnesyl diphosphate synthase	-2.6974	0.00172661
GO_SMALL_MOLECULE_BIOSYNTHETIC_PROCESS	873	CBR1	carbonyl reductase 1	1.60544	0.00024507
GO_SMALL_MOLECULE_BIOSYNTHETIC_PROCESS	1582	CYP8B1	cytochrome P450, family 8, subfamily B, polypeptide 1	3.55399	0.00785468
GO_SMALL_MOLECULE_BIOSYNTHETIC_PROCESS	38	ACAT1	acetyl-CoA acetyltransferase 1	1.77339	0.000855305
GO_SMALL_MOLECULE_BIOSYNTHETIC_PROCESS	3931	LCAT	lecithin-cholesterol acyltransferase	1.64584	0.0152627
GO_SMALL_MOLECULE_BIOSYNTHETIC_PROCESS	2820	GPD2	glycerol-3-phosphate dehydrogenase 2 (mitochondrial)	1.58725	0.0356215
GO_SMALL_MOLECULE_BIOSYNTHETIC_PROCESS	51141	INSIG2	insulin induced gene 2	4.51312	0.000275459
GO_SMALL_MOLECULE_BIOSYNTHETIC_PROCESS	1576	CYP3A4	cytochrome P450, family 3, subfamily A, polypeptide 4	2.18741	0.000111938
GO_SMALL_MOLECULE_BIOSYNTHETIC_PROCESS	1491	CTH	cystathionase (cystathionine gamma-lyase)	1.64867	0.00943928
GO_SMALL_MOLECULE_BIOSYNTHETIC_PROCESS	8424	BBOX1	butyrobetaine (gamma), 2-oxoglutarate dioxygenase (gamma-butyrobetaine hydroxylase) 1	1.59043	0.00889699
GO_ALCOHOL_METABOLIC_PROCESS	51477	ISYNA1	inositol-3-phosphate synthase 1	-2.42543	0.00551362
GO_ALCOHOL_METABOLIC_PROCESS	1718	DHCR24	24-dehydrocholesterol reductase	-1.58136	0.0182725
GO_ALCOHOL_METABOLIC_PROCESS	10901	DHRS4	dehydrogenase/reductase (SDR family) member 4	1.58677	0.00312422
GO_ALCOHOL_METABOLIC_PROCESS	3158	HMGCS2	3-hydroxy-3-methylglutaryl-CoA synthase 2 (mitochondrial)	1.69489	0.00079222
GO_ALCOHOL_METABOLIC_PROCESS	10400	PEMT	phosphatidylethanolamine N-methyltransferase	1.51585	0.0193472
GO_ALCOHOL_METABOLIC_PROCESS	3422	IDI1	isopentenyl-diphosphate delta isomerase 1	-3.14131	0.000814091
GO_ALCOHOL_METABOLIC_PROCESS	3156	HMGCR	3-hydroxy-3-methylglutaryl-CoA reductase	-1.61115	0.0191748
GO_ALCOHOL_METABOLIC_PROCESS	1595	CYP51A1	cytochrome P450, family 51, subfamily A, polypeptide 1	-2.46406	0.00328032
GO_ALCOHOL_METABOLIC_PROCESS	6713	SQLE	squalene epoxidase	-2.98702	0.00195107
GO_ALCOHOL_METABOLIC_PROCESS	5444	PON1	paraoxonase 1	1.51404	0.00152714
GO_ALCOHOL_METABOLIC_PROCESS	51302	CYP39A1	cytochrome P450, family 39, subfamily A, polypeptide 1	2.42464	0.00251403
GO_ALCOHOL_METABOLIC_PROCESS	2171	FABP5	fatty acid binding protein 5 (psoriasis-associated)	-1.73529	0.00148123
GO_ALCOHOL_METABOLIC_PROCESS	590	BCHE	butyrylcholinesterase	1.63658	0.000631726
GO_ALCOHOL_METABOLIC_PROCESS	847	CAT	catalase	1.60446	0.00171348
GO_ALCOHOL_METABOLIC_PROCESS	27329	ANGPTL3	angiopoietin-like 3	1.50328	0.00531285
GO_ALCOHOL_METABOLIC_PROCESS	635	BHMT	betaine--homocysteine S-methyltransferase	1.70162	0.0343933
GO_ALCOHOL_METABOLIC_PROCESS	1050	CEBPA	CCAAT/enhancer binding protein (C/EBP), alpha	-1.51687	0.0147935
GO_ALCOHOL_METABOLIC_PROCESS	54884	RETSAT	retinol saturase (all-trans-retinol 13,14-reductase)	4.89906	9.08576e-05
GO_ALCOHOL_METABOLIC_PROCESS	50814	NSDHL	NAD(P) dependent steroid dehydrogenase-like	-2.14416	0.00831368
GO_ALCOHOL_METABOLIC_PROCESS	2224	FDPS	farnesyl diphosphate synthase	-2.6974	0.00172661
GO_ALCOHOL_METABOLIC_PROCESS	3953	LEPR	leptin receptor	1.63649	0.00281941
GO_ALCOHOL_METABOLIC_PROCESS	1119	CHKA	choline kinase alpha	2.68308	0.00340228
GO_ALCOHOL_METABOLIC_PROCESS	1582	CYP8B1	cytochrome P450, family 8, subfamily B, polypeptide 1	3.55399	0.00785468
GO_ALCOHOL_METABOLIC_PROCESS	2710	GK	glycerol kinase	1.6816	0.0019605
GO_ALCOHOL_METABOLIC_PROCESS	3988	LIPA	lipase A, lysosomal acid, cholesterol esterase	1.61684	0.00596293
GO_ALCOHOL_METABOLIC_PROCESS	224	ALDH3A2	aldehyde dehydrogenase 3 family, member A2	3.5243	0.00086725
GO_ALCOHOL_METABOLIC_PROCESS	3931	LCAT	lecithin-cholesterol acyltransferase	1.64584	0.0152627
GO_ALCOHOL_METABOLIC_PROCESS	2820	GPD2	glycerol-3-phosphate dehydrogenase 2 (mitochondrial)	1.58725	0.0356215
GO_ALCOHOL_METABOLIC_PROCESS	51141	INSIG2	insulin induced gene 2	4.51312	0.000275459
GO_ALCOHOL_METABOLIC_PROCESS	1576	CYP3A4	cytochrome P450, family 3, subfamily A, polypeptide 4	2.18741	0.000111938
GO_LIPID_MODIFICATION	2110	ETFDH	electron-transferring-flavoprotein dehydrogenase	1.79156	0.00020707
GO_LIPID_MODIFICATION	10455	ECI2	enoyl-CoA delta isomerase 2	1.74498	0.00178871
GO_LIPID_MODIFICATION	3032	HADHB	hydroxyacyl-CoA dehydrogenase/3-ketoacyl-CoA thiolase/enoyl-CoA hydratase (trifunctional protein), beta subunit	1.92885	0.000229025
GO_LIPID_MODIFICATION	1375	CPT1B	carnitine palmitoyltransferase 1B (muscle)	1.50418	0.0301416
GO_LIPID_MODIFICATION	1666	DECR1	2,4-dienoyl CoA reductase 1, mitochondrial	1.7845	0.000543546
GO_LIPID_MODIFICATION	33	ACADL	acyl-CoA dehydrogenase, long chain	1.72816	0.0028287
GO_LIPID_MODIFICATION	84129	ACAD11	acyl-CoA dehydrogenase family, member 11	1.67146	0.000646651
GO_LIPID_MODIFICATION	5825	ABCD3	ATP-binding cassette, sub-family D (ALD), member 3	1.6066	0.00182228
GO_LIPID_MODIFICATION	3030	HADHA	hydroxyacyl-CoA dehydrogenase/3-ketoacyl-CoA thiolase/enoyl-CoA hydratase (trifunctional protein), alpha subunit	1.54394	0.000306471
GO_LIPID_MODIFICATION	2053	EPHX2	epoxide hydrolase 2, cytoplasmic	2.12978	0.000393204
GO_LIPID_MODIFICATION	1376	CPT2	carnitine palmitoyltransferase 2	2.1735	0.00144014
GO_LIPID_MODIFICATION	224	ALDH3A2	aldehyde dehydrogenase 3 family, member A2	3.5243	0.00086725
GO_LIPID_MODIFICATION	3931	LCAT	lecithin-cholesterol acyltransferase	1.64584	0.0152627
GO_LIPID_MODIFICATION	1962	EHHADH	enoyl-CoA, hydratase/3-hydroxyacyl CoA dehydrogenase	9.64907	0.000126974
GO_LIPID_MODIFICATION	8660	IRS2	insulin receptor substrate 2	1.76076	0.0410914
GO_LIPID_MODIFICATION	225	ABCD2	ATP-binding cassette, sub-family D (ALD), member 2	1.80682	0.0319243
GO_LIPID_MODIFICATION	54677	CROT	carnitine O-octanoyltransferase	1.87563	0.000840794
GO_LIPID_MODIFICATION	1891	ECH1	enoyl CoA hydratase 1, peroxisomal	1.6658	0.00260057
GO_LIPID_MODIFICATION	1632	ECI1	enoyl-CoA delta isomerase 1	1.7211	0.00210442
GO_LIPID_MODIFICATION	3295	HSD17B4	hydroxysteroid (17-beta) dehydrogenase 4	1.58035	0.000403005
GO_LIPID_MODIFICATION	1384	CRAT	carnitine O-acetyltransferase	2.85378	0.00285356
GO_LIPID_MODIFICATION	51	ACOX1	acyl-CoA oxidase 1, palmitoyl	1.66627	0.00242207
GO_LIPID_MODIFICATION	26061	HACL1	2-hydroxyacyl-CoA lyase 1	2.10651	0.000775308
GO_LIPID_MODIFICATION	34	ACADM	acyl-CoA dehydrogenase, C-4 to C-12 straight chain	1.99474	0.000454357
GO_LIPID_MODIFICATION	3033	HADH	hydroxyacyl-CoA dehydrogenase	1.52063	0.000393585
GO_STEROID_METABOLIC_PROCESS	3988	LIPA	lipase A, lysosomal acid, cholesterol esterase	1.61684	0.00596293
GO_STEROID_METABOLIC_PROCESS	3931	LCAT	lecithin-cholesterol acyltransferase	1.64584	0.0152627
GO_STEROID_METABOLIC_PROCESS	51170	HSD17B11	hydroxysteroid (17-beta) dehydrogenase 11	2.21898	0.00142
GO_STEROID_METABOLIC_PROCESS	1576	CYP3A4	cytochrome P450, family 3, subfamily A, polypeptide 4	2.18741	0.000111938
GO_STEROID_METABOLIC_PROCESS	51141	INSIG2	insulin induced gene 2	4.51312	0.000275459
GO_STEROID_METABOLIC_PROCESS	2224	FDPS	farnesyl diphosphate synthase	-2.6974	0.00172661
GO_STEROID_METABOLIC_PROCESS	3953	LEPR	leptin receptor	1.63649	0.00281941
GO_STEROID_METABOLIC_PROCESS	1582	CYP8B1	cytochrome P450, family 8, subfamily B, polypeptide 1	3.55399	0.00785468
GO_STEROID_METABOLIC_PROCESS	7363	UGT2B4	UDP glucuronosyltransferase 2 family, polypeptide B4	1.69942	0.0412316
GO_STEROID_METABOLIC_PROCESS	27329	ANGPTL3	angiopoietin-like 3	1.50328	0.00531285
GO_STEROID_METABOLIC_PROCESS	1050	CEBPA	CCAAT/enhancer binding protein (C/EBP), alpha	-1.51687	0.0147935
GO_STEROID_METABOLIC_PROCESS	50814	NSDHL	NAD(P) dependent steroid dehydrogenase-like	-2.14416	0.00831368
GO_STEROID_METABOLIC_PROCESS	51302	CYP39A1	cytochrome P450, family 39, subfamily A, polypeptide 1	2.42464	0.00251403
GO_STEROID_METABOLIC_PROCESS	847	CAT	catalase	1.60446	0.00171348
GO_STEROID_METABOLIC_PROCESS	8856	NR1I2	nuclear receptor subfamily 1, group I, member 2	1.57155	0.00343849
GO_STEROID_METABOLIC_PROCESS	6713	SQLE	squalene epoxidase	-2.98702	0.00195107
GO_STEROID_METABOLIC_PROCESS	5444	PON1	paraoxonase 1	1.51404	0.00152714
GO_STEROID_METABOLIC_PROCESS	3295	HSD17B4	hydroxysteroid (17-beta) dehydrogenase 4	1.58035	0.000403005
GO_STEROID_METABOLIC_PROCESS	3156	HMGCR	3-hydroxy-3-methylglutaryl-CoA reductase	-1.61115	0.0191748
GO_STEROID_METABOLIC_PROCESS	1595	CYP51A1	cytochrome P450, family 51, subfamily A, polypeptide 1	-2.46406	0.00328032
GO_STEROID_METABOLIC_PROCESS	3158	HMGCS2	3-hydroxy-3-methylglutaryl-CoA synthase 2 (mitochondrial)	1.69489	0.00079222
GO_STEROID_METABOLIC_PROCESS	3422	IDI1	isopentenyl-diphosphate delta isomerase 1	-3.14131	0.000814091
GO_STEROID_METABOLIC_PROCESS	1718	DHCR24	24-dehydrocholesterol reductase	-1.58136	0.0182725
GO_STEROID_METABOLIC_PROCESS	10901	DHRS4	dehydrogenase/reductase (SDR family) member 4	1.58677	0.00312422
GO_STEROID_METABOLIC_PROCESS	3290	HSD11B1	hydroxysteroid (11-beta) dehydrogenase 1	1.5875	0.00360464
GO_COFACTOR_METABOLIC_PROCESS	125061	AFMID	arylformamidase	2.05169	0.00261766
GO_COFACTOR_METABOLIC_PROCESS	10400	PEMT	phosphatidylethanolamine N-methyltransferase	1.51585	0.0193472
GO_COFACTOR_METABOLIC_PROCESS	54677	CROT	carnitine O-octanoyltransferase	1.87563	0.000840794
GO_COFACTOR_METABOLIC_PROCESS	10965	ACOT2	acyl-CoA thioesterase 2	4.63269	0.0062207
GO_COFACTOR_METABOLIC_PROCESS	4199	ME1	malic enzyme 1, NADP(+)-dependent, cytosolic	1.98158	0.0424975
GO_COFACTOR_METABOLIC_PROCESS	3295	HSD17B4	hydroxysteroid (17-beta) dehydrogenase 4	1.58035	0.000403005
GO_COFACTOR_METABOLIC_PROCESS	3156	HMGCR	3-hydroxy-3-methylglutaryl-CoA reductase	-1.61115	0.0191748
GO_COFACTOR_METABOLIC_PROCESS	134526	ACOT12	acyl-CoA thioesterase 12	1.89251	0.0005775
GO_COFACTOR_METABOLIC_PROCESS	2356	FPGS	folylpolyglutamate synthase	1.56811	0.000276656
GO_COFACTOR_METABOLIC_PROCESS	53354	PANK1	pantothenate kinase 1	1.50012	0.00261402
GO_COFACTOR_METABOLIC_PROCESS	283927	NUDT7	nudix (nucleoside diphosphate linked moiety X)-type motif 7	-2.17292	0.0458252
GO_COFACTOR_METABOLIC_PROCESS	8876	VNN1	vanin 1	3.1305	0.000774131
GO_COFACTOR_METABOLIC_PROCESS	83401	ELOVL3	ELOVL fatty acid elongase 3	6.40236	0.00054127
GO_COFACTOR_METABOLIC_PROCESS	8034	SLC25A16	solute carrier family 25 (mitochondrial carrier; Graves disease autoantigen), member 16	1.5307	0.00723438
GO_COFACTOR_METABOLIC_PROCESS	635	BHMT	betaine--homocysteine S-methyltransferase	1.70162	0.0343933
GO_COFACTOR_METABOLIC_PROCESS	2326	FMO1	flavin containing monooxygenase 1	1.84427	0.000408961
GO_COFACTOR_METABOLIC_PROCESS	60481	ELOVL5	ELOVL fatty acid elongase 5	2.31279	0.00910325
GO_COFACTOR_METABOLIC_PROCESS	1371	CPOX	coproporphyrinogen oxidase	1.91579	0.000180559
GO_COFACTOR_METABOLIC_PROCESS	4524	MTHFR	methylenetetrahydrofolate reductase (NAD(P)H)	1.66844	0.0183477
GO_COFACTOR_METABOLIC_PROCESS	55350	VNN3	vanin 3	1.81445	0.000890907
GO_COFACTOR_METABOLIC_PROCESS	122970	ACOT4	acyl-CoA thioesterase 4	3.38432	0.00368984
GO_COFACTOR_METABOLIC_PROCESS	51703	ACSL5	acyl-CoA synthetase long-chain family member 5	1.6176	0.000648662
GO_COFACTOR_METABOLIC_PROCESS	51166	AADAT	aminoadipate aminotransferase	1.53724	0.0176972
GO_COFACTOR_METABOLIC_PROCESS	6999	TDO2	tryptophan 2,3-dioxygenase	1.54417	0.00989422
GO_COFACTOR_METABOLIC_PROCESS	2180	ACSL1	acyl-CoA synthetase long-chain family member 1	3.24665	0.00047773
GO_COFACTOR_METABOLIC_PROCESS	873	CBR1	carbonyl reductase 1	1.60544	0.00024507
GO_COFACTOR_METABOLIC_PROCESS	3162	HMOX1	heme oxygenase (decycling) 1	1.56257	0.0232432
GO_COFACTOR_METABOLIC_PROCESS	641371	ACOT1	acyl-CoA thioesterase 1	9.21084	0.000784115
GO_SULFUR_COMPOUND_METABOLIC_PROCESS	4969	OGN	osteoglycin	1.73328	0.024935
GO_SULFUR_COMPOUND_METABOLIC_PROCESS	3295	HSD17B4	hydroxysteroid (17-beta) dehydrogenase 4	1.58035	0.000403005
GO_SULFUR_COMPOUND_METABOLIC_PROCESS	2729	GCLC	glutamate-cysteine ligase, catalytic subunit	1.91732	0.0112782
GO_SULFUR_COMPOUND_METABOLIC_PROCESS	51380	CSAD	cysteine sulfinic acid decarboxylase	1.73646	0.0117777
GO_SULFUR_COMPOUND_METABOLIC_PROCESS	2950	GSTP1	glutathione S-transferase pi 1	1.63912	0.0200483
GO_SULFUR_COMPOUND_METABOLIC_PROCESS	134526	ACOT12	acyl-CoA thioesterase 12	1.89251	0.0005775
GO_SULFUR_COMPOUND_METABOLIC_PROCESS	9446	GSTO1	glutathione S-transferase omega 1	1.52302	0.00912031
GO_SULFUR_COMPOUND_METABOLIC_PROCESS	283927	NUDT7	nudix (nucleoside diphosphate linked moiety X)-type motif 7	-2.17292	0.0458252
GO_SULFUR_COMPOUND_METABOLIC_PROCESS	8876	VNN1	vanin 1	3.1305	0.000774131
GO_SULFUR_COMPOUND_METABOLIC_PROCESS	2940	GSTA3	glutathione S-transferase alpha 3	1.75395	0.0010179
GO_SULFUR_COMPOUND_METABOLIC_PROCESS	2944	GSTM1	glutathione S-transferase mu 1	1.53353	0.0245594
GO_SULFUR_COMPOUND_METABOLIC_PROCESS	10400	PEMT	phosphatidylethanolamine N-methyltransferase	1.51585	0.0193472
GO_SULFUR_COMPOUND_METABOLIC_PROCESS	2941	GSTA4	glutathione S-transferase alpha 4	1.59347	0.049026
GO_SULFUR_COMPOUND_METABOLIC_PROCESS	10965	ACOT2	acyl-CoA thioesterase 2	4.63269	0.0062207
GO_SULFUR_COMPOUND_METABOLIC_PROCESS	6821	SUOX	sulfite oxidase	1.57706	0.00517778
GO_SULFUR_COMPOUND_METABOLIC_PROCESS	1491	CTH	cystathionase (cystathionine gamma-lyase)	1.64867	0.00943928
GO_SULFUR_COMPOUND_METABOLIC_PROCESS	4524	MTHFR	methylenetetrahydrofolate reductase (NAD(P)H)	1.66844	0.0183477
GO_SULFUR_COMPOUND_METABOLIC_PROCESS	55350	VNN3	vanin 3	1.81445	0.000890907
GO_SULFUR_COMPOUND_METABOLIC_PROCESS	122970	ACOT4	acyl-CoA thioesterase 4	3.38432	0.00368984
GO_SULFUR_COMPOUND_METABOLIC_PROCESS	51703	ACSL5	acyl-CoA synthetase long-chain family member 5	1.6176	0.000648662
GO_SULFUR_COMPOUND_METABOLIC_PROCESS	2939	GSTA2	glutathione S-transferase alpha 2	2.34296	0.0223154
GO_SULFUR_COMPOUND_METABOLIC_PROCESS	6999	TDO2	tryptophan 2,3-dioxygenase	1.54417	0.00989422
GO_SULFUR_COMPOUND_METABOLIC_PROCESS	2180	ACSL1	acyl-CoA synthetase long-chain family member 1	3.24665	0.00047773
GO_SULFUR_COMPOUND_METABOLIC_PROCESS	51166	AADAT	aminoadipate aminotransferase	1.53724	0.0176972
GO_SULFUR_COMPOUND_METABOLIC_PROCESS	641371	ACOT1	acyl-CoA thioesterase 1	9.21084	0.000784115
GO_SULFUR_COMPOUND_METABOLIC_PROCESS	83401	ELOVL3	ELOVL fatty acid elongase 3	6.40236	0.00054127
GO_SULFUR_COMPOUND_METABOLIC_PROCESS	635	BHMT	betaine--homocysteine S-methyltransferase	1.70162	0.0343933
GO_SULFUR_COMPOUND_METABOLIC_PROCESS	60481	ELOVL5	ELOVL fatty acid elongase 5	2.31279	0.00910325
GO_COENZYME_METABOLIC_PROCESS	60481	ELOVL5	ELOVL fatty acid elongase 5	2.31279	0.00910325
GO_COENZYME_METABOLIC_PROCESS	2326	FMO1	flavin containing monooxygenase 1	1.84427	0.000408961
GO_COENZYME_METABOLIC_PROCESS	635	BHMT	betaine--homocysteine S-methyltransferase	1.70162	0.0343933
GO_COENZYME_METABOLIC_PROCESS	8034	SLC25A16	solute carrier family 25 (mitochondrial carrier; Graves disease autoantigen), member 16	1.5307	0.00723438
GO_COENZYME_METABOLIC_PROCESS	83401	ELOVL3	ELOVL fatty acid elongase 3	6.40236	0.00054127
GO_COENZYME_METABOLIC_PROCESS	641371	ACOT1	acyl-CoA thioesterase 1	9.21084	0.000784115
GO_COENZYME_METABOLIC_PROCESS	51166	AADAT	aminoadipate aminotransferase	1.53724	0.0176972
GO_COENZYME_METABOLIC_PROCESS	2180	ACSL1	acyl-CoA synthetase long-chain family member 1	3.24665	0.00047773
GO_COENZYME_METABOLIC_PROCESS	6999	TDO2	tryptophan 2,3-dioxygenase	1.54417	0.00989422
GO_COENZYME_METABOLIC_PROCESS	51703	ACSL5	acyl-CoA synthetase long-chain family member 5	1.6176	0.000648662
GO_COENZYME_METABOLIC_PROCESS	122970	ACOT4	acyl-CoA thioesterase 4	3.38432	0.00368984
GO_COENZYME_METABOLIC_PROCESS	55350	VNN3	vanin 3	1.81445	0.000890907
GO_COENZYME_METABOLIC_PROCESS	4524	MTHFR	methylenetetrahydrofolate reductase (NAD(P)H)	1.66844	0.0183477
GO_COENZYME_METABOLIC_PROCESS	4199	ME1	malic enzyme 1, NADP(+)-dependent, cytosolic	1.98158	0.0424975
GO_COENZYME_METABOLIC_PROCESS	10965	ACOT2	acyl-CoA thioesterase 2	4.63269	0.0062207
GO_COENZYME_METABOLIC_PROCESS	54677	CROT	carnitine O-octanoyltransferase	1.87563	0.000840794
GO_COENZYME_METABOLIC_PROCESS	10400	PEMT	phosphatidylethanolamine N-methyltransferase	1.51585	0.0193472
GO_COENZYME_METABOLIC_PROCESS	125061	AFMID	arylformamidase	2.05169	0.00261766
GO_COENZYME_METABOLIC_PROCESS	8876	VNN1	vanin 1	3.1305	0.000774131
GO_COENZYME_METABOLIC_PROCESS	283927	NUDT7	nudix (nucleoside diphosphate linked moiety X)-type motif 7	-2.17292	0.0458252
GO_COENZYME_METABOLIC_PROCESS	53354	PANK1	pantothenate kinase 1	1.50012	0.00261402
GO_COENZYME_METABOLIC_PROCESS	2356	FPGS	folylpolyglutamate synthase	1.56811	0.000276656
GO_COENZYME_METABOLIC_PROCESS	134526	ACOT12	acyl-CoA thioesterase 12	1.89251	0.0005775
GO_COENZYME_METABOLIC_PROCESS	3156	HMGCR	3-hydroxy-3-methylglutaryl-CoA reductase	-1.61115	0.0191748
GO_COENZYME_METABOLIC_PROCESS	3295	HSD17B4	hydroxysteroid (17-beta) dehydrogenase 4	1.58035	0.000403005
GO_ORGANIC_ANION_TRANSPORT	6566	SLC16A1	solute carrier family 16, member 1 (monocarboxylic acid transporter 1)	2.16833	0.0025293
GO_ORGANIC_ANION_TRANSPORT	8671	SLC4A4	solute carrier family 4, sodium bicarbonate cotransporter, member 4	1.54624	0.00500488
GO_ORGANIC_ANION_TRANSPORT	201232	SLC16A13	solute carrier family 16, member 13 (monocarboxylic acid transporter 13)	1.5352	0.0127123
GO_ORGANIC_ANION_TRANSPORT	8714	ABCC3	ATP-binding cassette, sub-family C (CFTR/MRP), member 3	2.14302	0.00354122
GO_ORGANIC_ANION_TRANSPORT	225	ABCD2	ATP-binding cassette, sub-family D (ALD), member 2	1.80682	0.0319243
GO_ORGANIC_ANION_TRANSPORT	246213	SLC17A8	solute carrier family 17 (sodium-dependent inorganic phosphate cotransporter), member 8	3.8658	0.00138831
GO_ORGANIC_ANION_TRANSPORT	634	CEACAM1	carcinoembryonic antigen-related cell adhesion molecule 1 (biliary glycoprotein)	1.50125	0.00224974
GO_ORGANIC_ANION_TRANSPORT	54677	CROT	carnitine O-octanoyltransferase	1.87563	0.000840794
GO_ORGANIC_ANION_TRANSPORT	9121	SLC16A5	solute carrier family 16, member 5 (monocarboxylic acid transporter 6)	1.6354	0.00113775
GO_ORGANIC_ANION_TRANSPORT	6584	SLC22A5	solute carrier family 22 (organic cation/carnitine transporter), member 5	2.19767	0.00263368
GO_ORGANIC_ANION_TRANSPORT	58488	PCTP	phosphatidylcholine transfer protein	3.99036	0.0164868
GO_ORGANIC_ANION_TRANSPORT	1376	CPT2	carnitine palmitoyltransferase 2	2.1735	0.00144014
GO_ORGANIC_ANION_TRANSPORT	64849	SLC13A3	solute carrier family 13 (sodium-dependent dicarboxylate transporter), member 3	-2.01077	0.0410159
GO_ORGANIC_ANION_TRANSPORT	2180	ACSL1	acyl-CoA synthetase long-chain family member 1	3.24665	0.00047773
GO_ORGANIC_ANION_TRANSPORT	206358	SLC36A1	solute carrier family 36 (proton/amino acid symporter), member 1	-1.51107	0.000874713
GO_ORGANIC_ANION_TRANSPORT	23250	ATP11A	ATPase, class VI, type 11A	-2.86629	0.0111107
GO_ORGANIC_ANION_TRANSPORT	123	PLIN2	perilipin 2	2.5629	0.00692206
GO_ORGANIC_ANION_TRANSPORT	4547	MTTP	microsomal triglyceride transfer protein	1.58083	0.000395105
GO_ORGANIC_ANION_TRANSPORT	284111	SLC13A5	solute carrier family 13 (sodium-dependent citrate transporter), member 5	-4.03895	0.0187846
GO_ORGANIC_ANION_TRANSPORT	347735	SERINC2	serine incorporator 2	1.50214	0.0111738
GO_ORGANIC_ANION_TRANSPORT	1375	CPT1B	carnitine palmitoyltransferase 1B (muscle)	1.50418	0.0301416
GO_ORGANIC_ANION_TRANSPORT	9194	SLC16A7	solute carrier family 16, member 7 (monocarboxylic acid transporter 2)	2.01742	0.00544407
GO_ORGANIC_ANION_TRANSPORT	5244	ABCB4	ATP-binding cassette, sub-family B (MDR/TAP), member 4	1.52019	0.0043556
GO_ORGANIC_ANION_TRANSPORT	5825	ABCD3	ATP-binding cassette, sub-family D (ALD), member 3	1.6066	0.00182228
GO_ORGANIC_ANION_TRANSPORT	10955	SERINC3	serine incorporator 3	1.76767	0.0036202
GO_ORGANIC_ANION_TRANSPORT	788	SLC25A20	solute carrier family 25 (carnitine/acylcarnitine translocase), member 20	2.22906	8.36687e-05
GO_ORGANIC_ANION_TRANSPORT	948	CD36	CD36 molecule (thrombospondin receptor)	2.56785	0.00632914
GO_ORGANIC_ANION_TRANSPORT	761	CA3	carbonic anhydrase III, muscle specific	2.60538	0.00219411

## Sheet: GO-CC
Gene Set Name	Description	Genes in Gene Set	Genes in Overlap	P-value	FDR	Count of AntibodyList
GO_ENDOPLASMIC_RETICULUM	The irregular network of unit membranes, visible only by electron microscopy, that occurs in the cytoplasm of many eukaryotic cells. The membranes form a complex meshwork of tubular channels, which are often expanded into slitlike cavities called cisternae. The ER takes two forms, rough (or granular), with ribosomes adhering to the outer surface, and smooth (with no ribosomes attached).	1631	70	5.24e-34	1.64e-31	0
GO_MITOCHONDRION	A semiautonomous, self replicating organelle that occurs in varying numbers, shapes, and sizes in the cytoplasm of virtually all eukaryotic cells. It is notably the site of tissue respiration.	1633	70	5.66e-34	1.64e-31	1
GO_MICROBODY	Cytoplasmic organelles, spherical or oval in shape, that are bounded by a single membrane and contain oxidative enzymes, especially those utilizing hydrogen peroxide (H2O2).	134	27	3.06e-31	5.92e-29	0
GO_ENDOPLASMIC_RETICULUM_PART	Any constituent part of the endoplasmic reticulum, the irregular network of unit membranes, visible only by electron microscopy, that occurs in the cytoplasm of many eukaryotic cells. The membranes form a complex meshwork of tubular channels, which are often expanded into slitlike cavities called cisternae.	1163	57	1.55e-30	2.25e-28	0
GO_NUCLEAR_OUTER_MEMBRANE_ENDOPLASMIC_RETICULUM_MEMBRANE_NETWORK	The continuous network of membranes encompassing the nuclear outer membrane and the endoplasmic reticulum membrane.	1005	53	6.37e-30	7.39e-28	0
GO_MICROBODY_PART	Any constituent part of a microbody, a cytoplasmic organelle, spherical or oval in shape, that is bounded by a single membrane and contains oxidative enzymes, especially those utilizing hydrogen peroxide (H2O2).	93	20	4.63e-24	4.48e-22	0
GO_MITOCHONDRIAL_PART	Any constituent part of a mitochondrion, a semiautonomous, self replicating organelle that occurs in varying numbers, shapes, and sizes in the cytoplasm of virtually all eukaryotic cells. It is notably the site of tissue respiration.	953	45	1.65e-23	1.37e-21	1
GO_MITOCHONDRIAL_ENVELOPE	The double lipid bilayer enclosing the mitochondrion and separating its contents from the cell cytoplasm; includes the intermembrane space.	691	38	3.1e-22	2.25e-20	1
GO_ENVELOPE	A multilayered structure surrounding all or part of a cell; encompasses one or more lipid bilayers, and may include a cell wall layer; also includes the space between layers.	1090	46	4.92e-22	3.17e-20	1
GO_MICROBODY_MEMBRANE	The lipid bilayer surrounding a microbody.	58	13	2.42e-16	1.37e-14	0
GO_ORGANELLE_INNER_MEMBRANE	The inner, i.e. lumen-facing, lipid bilayer of an organelle envelope; usually highly selective to most ions and metabolites.	525	28	2.59e-16	1.37e-14	0
GO_MICROBODY_LUMEN	The volume enclosed by the membranes of a microbody.	45	11	1.75e-14	8.46e-13	0
GO_MITOCHONDRIAL_MATRIX	The gel-like material, with considerable fine structure, that lies in the matrix space, or lumen, of a mitochondrion. It contains the enzymes of the tricarboxylic acid cycle and, in some organisms, the enzymes concerned with fatty acid oxidation.	412	21	3.62e-12	1.61e-10	0
GO_EXTRACELLULAR_SPACE	That part of a multicellular organism outside the cells proper, usually taken to be outside the plasma membranes, and occupied by fluid.	1376	34	4.81e-10	1.99e-08	0
GO_LIPID_PARTICLE	An intracellular non-membrane-bounded organelle comprising a matrix of coalesced lipids surrounded by a phospholipid monolayer. May include associated proteins.	62	8	1.53e-08	5.92e-07	0
GO_MEMBRANE_PROTEIN_COMPLEX	Any protein complex that is part of a membrane.	1020	26	3.17e-08	1.15e-06	0
GO_APICAL_PART_OF_CELL	The region of a polarized cell that forms a tip or is distal to a base. For example, in a polarized epithelial cell, the apical region has an exposed surface and lies opposite to the basal lamina that separates the epithelium from other tissue.	361	15	6.86e-08	2.34e-06	0
GO_PLASMA_MEMBRANE_REGION	A membrane that is a (regional) part of the plasma membrane.	929	23	3.36e-07	1.08e-05	0
GO_APICAL_PLASMA_MEMBRANE	The region of the plasma membrane located at the apical end of the cell.	292	12	1.59e-06	4.85e-05	0
GO_MEMBRANE_REGION	A membrane that is a part of a larger membrane. Examples include the apical region of the plasma membrane of an epithelial cell and the various regions of the endoplasmic reticulum membrane.	1134	24	2.89e-06	8.37e-05	0
GO_INTRACELLULAR_VESICLE	Any vesicle that is part of the intracellular region.	1259	25	5.41e-06	0.000149	0
GO_GOLGI_APPARATUS	A compound membranous cytoplasmic organelle of eukaryotic cells, consisting of flattened, ribosome-free vesicles arranged in a more or less regular stack. The Golgi apparatus differs from the endoplasmic reticulum in often having slightly thicker membranes, appearing in sections as a characteristic shallow semicircle so that the convex side (cis or entry face) abuts the endoplasmic reticulum, sec…	1445	27	6.83e-06	0.000173	0
GO_INTRINSIC_COMPONENT_OF_ORGANELLE_MEMBRANE	The component of the organelle membrane consisting of the gene products and protein complexes having either part of their peptide sequence embedded in the hydrophobic region of the membrane or some other covalently attached group such as a GPI anchor that is similarly embedded in the membrane.	281	11	6.85e-06	0.000173	0
GO_CATALYTIC_COMPLEX	A protein complex which is capable of catalytic activity.	1038	22	7.36e-06	0.000178	0
GO_OUTER_MEMBRANE	The external membrane of Gram-negative bacteria or certain organelles such as mitochondria and chloroplasts; freely permeable to most ions and metabolites.	190	9	1.05e-05	0.000243	0
GO_INTRINSIC_COMPONENT_OF_PLASMA_MEMBRANE	The component of the plasma membrane consisting of the gene products and protein complexes having either part of their peptide sequence embedded in the hydrophobic region of the membrane or some other covalently attached group such as a GPI anchor that is similarly embedded in the membrane.	1649	28	2.6e-05	0.00058	0
GO_CELL_PROJECTION	A prolongation or process extending from a cell, e.g. a flagellum or axon.	1786	29	4.15e-05	0.000891	0
GO_COATED_VESICLE	Small membrane-bounded organelle formed by pinching off of a coated region of membrane. Some coats are made of clathrin, whereas others are made from other proteins.	234	9	5.38e-05	0.00111	0
GO_INTRINSIC_COMPONENT_OF_ENDOPLASMIC_RETICULUM_MEMBRANE	The component of the endoplasmic reticulum membrane consisting of the gene products and protein complexes having either part of their peptide sequence embedded in the hydrophobic region of the membrane or some other covalently attached group such as a GPI anchor that is similarly embedded in the membrane.	136	7	5.99e-05	0.0012	0
GO_CLUSTER_OF_ACTIN_BASED_CELL_PROJECTIONS	A cell part consisting of multiple, closely packed actin-based cell projections.	139	7	6.88e-05	0.00133	0

## Sheet: GO-CC_detail
Gene Set Name	Gene Id	Gene Symbol	Description	Fold Change	ANOVA p-value
GO_ENDOPLASMIC_RETICULUM	128486	FITM2	fat storage-inducing transmembrane protein 2	1.79922	0.00138607
GO_ENDOPLASMIC_RETICULUM	161247	FITM1	fat storage-inducing transmembrane protein 1	1.84418	0.00727275
GO_ENDOPLASMIC_RETICULUM	1384	CRAT	carnitine O-acetyltransferase	2.85378	0.00285356
GO_ENDOPLASMIC_RETICULUM	6713	SQLE	squalene epoxidase	-2.98702	0.00195107
GO_ENDOPLASMIC_RETICULUM	79174	CRELD2	cysteine-rich with EGF-like domains 2	1.84066	0.0376209
GO_ENDOPLASMIC_RETICULUM	56246	MRAP	melanocortin 2 receptor accessory protein	1.83763	0.00151645
GO_ENDOPLASMIC_RETICULUM	1595	CYP51A1	cytochrome P450, family 51, subfamily A, polypeptide 1	-2.46406	0.00328032
GO_ENDOPLASMIC_RETICULUM	3156	HMGCR	3-hydroxy-3-methylglutaryl-CoA reductase	-1.61115	0.0191748
GO_ENDOPLASMIC_RETICULUM	2531	KDSR	3-ketodihydrosphingosine reductase	1.50092	0.00438066
GO_ENDOPLASMIC_RETICULUM	64225	ATL2	atlastin GTPase 2	1.51819	0.00451149
GO_ENDOPLASMIC_RETICULUM	201595	STT3B	STT3, subunit of the oligosaccharyltransferase complex, homolog B (S. cerevisiae)	1.72235	0.00723731
GO_ENDOPLASMIC_RETICULUM	9367	RAB9A	RAB9A, member RAS oncogene family	1.56683	0.0121649
GO_ENDOPLASMIC_RETICULUM	10400	PEMT	phosphatidylethanolamine N-methyltransferase	1.51585	0.0193472
GO_ENDOPLASMIC_RETICULUM	133688	UGT3A1	UDP glycosyltransferase 3 family, polypeptide A1	1.59242	0.000962368
GO_ENDOPLASMIC_RETICULUM	10555	AGPAT2	1-acylglycerol-3-phosphate O-acyltransferase 2 (lysophosphatidic acid acyltransferase, beta)	1.89944	0.00515849
GO_ENDOPLASMIC_RETICULUM	488	ATP2A2	ATPase, Ca++ transporting, cardiac muscle, slow twitch 2	1.91167	0.00039089
GO_ENDOPLASMIC_RETICULUM	10483	SEC23B	Sec23 homolog B (S. cerevisiae)	1.62665	0.0425813
GO_ENDOPLASMIC_RETICULUM	2590	GALNT2	UDP-N-acetyl-alpha-D-galactosamine:polypeptide N-acetylgalactosaminyltransferase 2 (GalNAc-T2)	1.58888	0.00242936
GO_ENDOPLASMIC_RETICULUM	79087	ALG12	asparagine-linked glycosylation 12, alpha-1,6-mannosyltransferase homolog (S. cerevisiae)	1.55588	0.0161877
GO_ENDOPLASMIC_RETICULUM	7412	VCAM1	vascular cell adhesion molecule 1	1.66558	0.00324484
GO_ENDOPLASMIC_RETICULUM	6331	SCN5A	sodium channel, voltage-gated, type V, alpha subunit	-1.53853	0.000335994
GO_ENDOPLASMIC_RETICULUM	3290	HSD11B1	hydroxysteroid (11-beta) dehydrogenase 1	1.5875	0.00360464
GO_ENDOPLASMIC_RETICULUM	50999	TMED5	transmembrane emp24 protein transport domain containing 5	1.55305	0.0019467
GO_ENDOPLASMIC_RETICULUM	10901	DHRS4	dehydrogenase/reductase (SDR family) member 4	1.58677	0.00312422
GO_ENDOPLASMIC_RETICULUM	1718	DHCR24	24-dehydrocholesterol reductase	-1.58136	0.0182725
GO_ENDOPLASMIC_RETICULUM	10954	PDIA5	protein disulfide isomerase family A, member 5	-1.51962	0.0279201
GO_ENDOPLASMIC_RETICULUM	1576	CYP3A4	cytochrome P450, family 3, subfamily A, polypeptide 4	2.18741	0.000111938
GO_ENDOPLASMIC_RETICULUM	51141	INSIG2	insulin induced gene 2	4.51312	0.000275459
GO_ENDOPLASMIC_RETICULUM	84447	SYVN1	synovial apoptosis inhibitor 1, synoviolin	1.65736	0.00317976
GO_ENDOPLASMIC_RETICULUM	224	ALDH3A2	aldehyde dehydrogenase 3 family, member A2	3.5243	0.00086725
GO_ENDOPLASMIC_RETICULUM	7363	UGT2B4	UDP glucuronosyltransferase 2 family, polypeptide B4	1.69942	0.0412316
GO_ENDOPLASMIC_RETICULUM	8608	RDH16	retinol dehydrogenase 16 (all-trans)	1.6667	0.00456152
GO_ENDOPLASMIC_RETICULUM	2180	ACSL1	acyl-CoA synthetase long-chain family member 1	3.24665	0.00047773
GO_ENDOPLASMIC_RETICULUM	51703	ACSL5	acyl-CoA synthetase long-chain family member 5	1.6176	0.000648662
GO_ENDOPLASMIC_RETICULUM	1582	CYP8B1	cytochrome P450, family 8, subfamily B, polypeptide 1	3.55399	0.00785468
GO_ENDOPLASMIC_RETICULUM	23250	ATP11A	ATPase, class VI, type 11A	-2.86629	0.0111107
GO_ENDOPLASMIC_RETICULUM	206358	SLC36A1	solute carrier family 36 (proton/amino acid symporter), member 1	-1.51107	0.000874713
GO_ENDOPLASMIC_RETICULUM	169200	TMEM64	transmembrane protein 64	1.94757	0.00244606
GO_ENDOPLASMIC_RETICULUM	92840	REEP6	receptor accessory protein 6	1.63434	0.00501919
GO_ENDOPLASMIC_RETICULUM	4547	MTTP	microsomal triglyceride transfer protein	1.58083	0.000395105
GO_ENDOPLASMIC_RETICULUM	123	PLIN2	perilipin 2	2.5629	0.00692206
GO_ENDOPLASMIC_RETICULUM	3162	HMOX1	heme oxygenase (decycling) 1	1.56257	0.0232432
GO_ENDOPLASMIC_RETICULUM	51246	SHISA5	shisa homolog 5 (Xenopus laevis)	-1.99195	0.000136461
GO_ENDOPLASMIC_RETICULUM	1603	DAD1	defender against cell death 1	1.9138	0.00850953
GO_ENDOPLASMIC_RETICULUM	57104	PNPLA2	patatin-like phospholipase domain containing 2	1.81129	0.022903
GO_ENDOPLASMIC_RETICULUM	6400	SEL1L	sel-1 suppressor of lin-12-like (C. elegans)	1.5051	0.00447047
GO_ENDOPLASMIC_RETICULUM	11343	MGLL	monoglyceride lipase	1.86235	0.00245045
GO_ENDOPLASMIC_RETICULUM	51128	SAR1B	SAR1 homolog B (S. cerevisiae)	1.62151	0.0006586
GO_ENDOPLASMIC_RETICULUM	50814	NSDHL	NAD(P) dependent steroid dehydrogenase-like	-2.14416	0.00831368
GO_ENDOPLASMIC_RETICULUM	10195	ALG3	asparagine-linked glycosylation 3, alpha-1,3- mannosyltransferase homolog (S. cerevisiae)	1.6181	0.0213585
GO_ENDOPLASMIC_RETICULUM	2621	GAS6	growth arrest-specific 6	-2.46472	0.00347183
GO_ENDOPLASMIC_RETICULUM	54884	RETSAT	retinol saturase (all-trans-retinol 13,14-reductase)	4.89906	9.08576e-05
GO_ENDOPLASMIC_RETICULUM	3032	HADHB	hydroxyacyl-CoA dehydrogenase/3-ketoacyl-CoA thiolase/enoyl-CoA hydratase (trifunctional protein), beta subunit	1.92885	0.000229025
GO_ENDOPLASMIC_RETICULUM	83401	ELOVL3	ELOVL fatty acid elongase 3	6.40236	0.00054127
GO_ENDOPLASMIC_RETICULUM	2326	FMO1	flavin containing monooxygenase 1	1.84427	0.000408961
GO_ENDOPLASMIC_RETICULUM	60481	ELOVL5	ELOVL fatty acid elongase 5	2.31279	0.00910325
GO_ENDOPLASMIC_RETICULUM	392636	AGMO	alkylglycerol monooxygenase	1.78901	0.00121152
GO_ENDOPLASMIC_RETICULUM	128869	PIGU	phosphatidylinositol glycan anchor biosynthesis, class U	1.72966	0.00213706
GO_ENDOPLASMIC_RETICULUM	3309	HSPA5	heat shock 70kDa protein 5 (glucose-regulated protein, 78kDa)	1.50922	0.0237466
GO_ENDOPLASMIC_RETICULUM	9697	TRAM2	translocation associated membrane protein 2	1.64222	0.00351851
GO_ENDOPLASMIC_RETICULUM	972	CD74	CD74 molecule, major histocompatibility complex, class II invariant chain	2.00907	0.00446325
GO_ENDOPLASMIC_RETICULUM	847	CAT	catalase	1.60446	0.00171348
GO_ENDOPLASMIC_RETICULUM	2157	F8	coagulation factor VIII, procoagulant component	1.54088	0.0141895
GO_ENDOPLASMIC_RETICULUM	590	BCHE	butyrylcholinesterase	1.63658	0.000631726
GO_ENDOPLASMIC_RETICULUM	80315	CPEB4	cytoplasmic polyadenylation element binding protein 4	1.71331	0.0137244
GO_ENDOPLASMIC_RETICULUM	2052	EPHX1	epoxide hydrolase 1, microsomal (xenobiotic)	2.1115	0.00232446
GO_ENDOPLASMIC_RETICULUM	2984	GUCY2C	guanylate cyclase 2C (heat stable enterotoxin receptor)	-1.67592	0.0313742
GO_ENDOPLASMIC_RETICULUM	63924	CIDEC	cell death-inducing DFFA-like effector c	2.70397	0.00162274
GO_ENDOPLASMIC_RETICULUM	1580	CYP4B1	cytochrome P450, family 4, subfamily B, polypeptide 1	1.52747	0.0026546
GO_ENDOPLASMIC_RETICULUM	51302	CYP39A1	cytochrome P450, family 39, subfamily A, polypeptide 1	2.42464	0.00251403
GO_MITOCHONDRION	6296	ACSM3	acyl-CoA synthetase medium-chain family member 3	1.55279	0.0151525
GO_MITOCHONDRION	3032	HADHB	hydroxyacyl-CoA dehydrogenase/3-ketoacyl-CoA thiolase/enoyl-CoA hydratase (trifunctional protein), beta subunit	1.92885	0.000229025
GO_MITOCHONDRION	192286	HIGD2A	HIG1 hypoxia inducible domain family, member 2A	1.64608	0.030476
GO_MITOCHONDRION	2110	ETFDH	electron-transferring-flavoprotein dehydrogenase	1.79156	0.00020707
GO_MITOCHONDRION	8034	SLC25A16	solute carrier family 25 (mitochondrial carrier; Graves disease autoantigen), member 16	1.5307	0.00723438
GO_MITOCHONDRION	10455	ECI2	enoyl-CoA delta isomerase 2	1.74498	0.00178871
GO_MITOCHONDRION	33	ACADL	acyl-CoA dehydrogenase, long chain	1.72816	0.0028287
GO_MITOCHONDRION	84129	ACAD11	acyl-CoA dehydrogenase family, member 11	1.67146	0.000646651
GO_MITOCHONDRION	2731	GLDC	glycine dehydrogenase (decarboxylating)	2.24637	0.000863899
GO_MITOCHONDRION	1375	CPT1B	carnitine palmitoyltransferase 1B (muscle)	1.50418	0.0301416
GO_MITOCHONDRION	4696	NDUFA3	NADH dehydrogenase (ubiquinone) 1 alpha subcomplex, 3, 9kDa	1.53457	0.0134308
GO_MITOCHONDRION	1666	DECR1	2,4-dienoyl CoA reductase 1, mitochondrial	1.7845	0.000543546
GO_MITOCHONDRION	788	SLC25A20	solute carrier family 25 (carnitine/acylcarnitine translocase), member 20	2.22906	8.36687e-05
GO_MITOCHONDRION	847	CAT	catalase	1.60446	0.00171348
GO_MITOCHONDRION	3030	HADHA	hydroxyacyl-CoA dehydrogenase/3-ketoacyl-CoA thiolase/enoyl-CoA hydratase (trifunctional protein), alpha subunit	1.54394	0.000306471
GO_MITOCHONDRION	9429	ABCG2	ATP-binding cassette, sub-family G (WHITE), member 2	1.80371	0.00152641
GO_MITOCHONDRION	1407	CRY1	cryptochrome 1 (photolyase-like)	2.34398	0.00040721
GO_MITOCHONDRION	3309	HSPA5	heat shock 70kDa protein 5 (glucose-regulated protein, 78kDa)	1.50922	0.0237466
GO_MITOCHONDRION	5825	ABCD3	ATP-binding cassette, sub-family D (ALD), member 3	1.6066	0.00182228
GO_MITOCHONDRION	1371	CPOX	coproporphyrinogen oxidase	1.91579	0.000180559
GO_MITOCHONDRION	6391	SDHC	succinate dehydrogenase complex, subunit C, integral membrane protein, 15kDa	1.62795	0.00613126
GO_MITOCHONDRION	8424	BBOX1	butyrobetaine (gamma), 2-oxoglutarate dioxygenase (gamma-butyrobetaine hydroxylase) 1	1.59043	0.00889699
GO_MITOCHONDRION	4329	ALDH6A1	aldehyde dehydrogenase 6 family, member A1	1.55718	0.0130025
GO_MITOCHONDRION	2745	GLRX	glutaredoxin (thioltransferase)	2.03647	0.00779883
GO_MITOCHONDRION	2820	GPD2	glycerol-3-phosphate dehydrogenase 2 (mitochondrial)	1.58725	0.0356215
GO_MITOCHONDRION	4129	MAOB	monoamine oxidase B	1.63753	0.00256494
GO_MITOCHONDRION	224	ALDH3A2	aldehyde dehydrogenase 3 family, member A2	3.5243	0.00086725
GO_MITOCHONDRION	2710	GK	glycerol kinase	1.6816	0.0019605
GO_MITOCHONDRION	23788	MTCH2	mitochondrial carrier 2	1.52655	0.0120035
GO_MITOCHONDRION	38	ACAT1	acetyl-CoA acetyltransferase 1	1.77339	0.000855305
GO_MITOCHONDRION	1376	CPT2	carnitine palmitoyltransferase 2	2.1735	0.00144014
GO_MITOCHONDRION	440503	PLIN5	perilipin 5	2.38038	7.74295e-05
GO_MITOCHONDRION	51703	ACSL5	acyl-CoA synthetase long-chain family member 5	1.6176	0.000648662
GO_MITOCHONDRION	9997	SCO2	SCO cytochrome oxidase deficient homolog 2 (yeast)	2.07655	0.0062045
GO_MITOCHONDRION	4715	NDUFB9	NADH dehydrogenase (ubiquinone) 1 beta subcomplex, 9, 22kDa	1.63818	0.0326675
GO_MITOCHONDRION	5166	PDK4	pyruvate dehydrogenase kinase, isozyme 4	4.66084	0.00209195
GO_MITOCHONDRION	79611	ACSS3	acyl-CoA synthetase short-chain family member 3	2.04006	0.0150236
GO_MITOCHONDRION	1962	EHHADH	enoyl-CoA, hydratase/3-hydroxyacyl CoA dehydrogenase	9.64907	0.000126974
GO_MITOCHONDRION	51166	AADAT	aminoadipate aminotransferase	1.53724	0.0176972
GO_MITOCHONDRION	1200	TPP1	tripeptidyl peptidase I	1.72256	0.0208322
GO_MITOCHONDRION	2180	ACSL1	acyl-CoA synthetase long-chain family member 1	3.24665	0.00047773
GO_MITOCHONDRION	9776	ATG13	ATG13 autophagy related 13 homolog (S. cerevisiae)	1.51192	0.0269545
GO_MITOCHONDRION	10628	TXNIP	thioredoxin interacting protein	1.88228	0.0465122
GO_MITOCHONDRION	283459	GATC	glutamyl-tRNA(Gln) amidotransferase, subunit C homolog (bacterial)	1.57923	0.00814744
GO_MITOCHONDRION	10400	PEMT	phosphatidylethanolamine N-methyltransferase	1.51585	0.0193472
GO_MITOCHONDRION	3158	HMGCS2	3-hydroxy-3-methylglutaryl-CoA synthase 2 (mitochondrial)	1.69489	0.00079222
GO_MITOCHONDRION	134266	GRPEL2	GrpE-like 2, mitochondrial (E. coli)	1.52803	0.00612424
GO_MITOCHONDRION	84263	HSDL2	hydroxysteroid dehydrogenase like 2	2.03511	0.000666637
GO_MITOCHONDRION	54677	CROT	carnitine O-octanoyltransferase	1.87563	0.000840794
GO_MITOCHONDRION	1891	ECH1	enoyl CoA hydratase 1, peroxisomal	1.6658	0.00260057
GO_MITOCHONDRION	841	CASP8	caspase 8, apoptosis-related cysteine peptidase	1.73114	0.0138296
GO_MITOCHONDRION	10965	ACOT2	acyl-CoA thioesterase 2	4.63269	0.0062207
GO_MITOCHONDRION	6821	SUOX	sulfite oxidase	1.57706	0.00517778
GO_MITOCHONDRION	23576	DDAH1	dimethylarginine dimethylaminohydrolase 1	2.68367	0.011911
GO_MITOCHONDRION	4199	ME1	malic enzyme 1, NADP(+)-dependent, cytosolic	1.98158	0.0424975
GO_MITOCHONDRION	10901	DHRS4	dehydrogenase/reductase (SDR family) member 4	1.58677	0.00312422
GO_MITOCHONDRION	1632	ECI1	enoyl-CoA delta isomerase 1	1.7211	0.00210442
GO_MITOCHONDRION	1384	CRAT	carnitine O-acetyltransferase	2.85378	0.00285356
GO_MITOCHONDRION	57406	ABHD6	abhydrolase domain containing 6	2.36925	0.00436045
GO_MITOCHONDRION	10247	HRSP12	heat-responsive protein 12	1.55689	0.00155555
GO_MITOCHONDRION	51	ACOX1	acyl-CoA oxidase 1, palmitoyl	1.66627	0.00242207
GO_MITOCHONDRION	3295	HSD17B4	hydroxysteroid (17-beta) dehydrogenase 4	1.58035	0.000403005
GO_MITOCHONDRION	128486	FITM2	fat storage-inducing transmembrane protein 2	1.79922	0.00138607
GO_MITOCHONDRION	10845	CLPX	ClpX caseinolytic peptidase X homolog (E. coli)	3.21089	0.00030944
GO_MITOCHONDRION	34	ACADM	acyl-CoA dehydrogenase, C-4 to C-12 straight chain	1.99474	0.000454357
GO_MITOCHONDRION	2950	GSTP1	glutathione S-transferase pi 1	1.63912	0.0200483
GO_MITOCHONDRION	6566	SLC16A1	solute carrier family 16, member 1 (monocarboxylic acid transporter 1)	2.16833	0.0025293
GO_MITOCHONDRION	2356	FPGS	folylpolyglutamate synthase	1.56811	0.000276656
GO_MITOCHONDRION	3033	HADH	hydroxyacyl-CoA dehydrogenase	1.52063	0.000393585
GO_MITOCHONDRION	25953	PNKD	paroxysmal nonkinesigenic dyskinesia	1.52536	0.00310289
GO_MICROBODY	5825	ABCD3	ATP-binding cassette, sub-family D (ALD), member 3	1.6066	0.00182228
GO_MICROBODY	847	CAT	catalase	1.60446	0.00171348
GO_MICROBODY	84129	ACAD11	acyl-CoA dehydrogenase family, member 11	1.67146	0.000646651
GO_MICROBODY	8800	PEX11A	peroxisomal biogenesis factor 11 alpha	3.57288	0.000654153
GO_MICROBODY	10455	ECI2	enoyl-CoA delta isomerase 2	1.74498	0.00178871
GO_MICROBODY	1962	EHHADH	enoyl-CoA, hydratase/3-hydroxyacyl CoA dehydrogenase	9.64907	0.000126974
GO_MICROBODY	2180	ACSL1	acyl-CoA synthetase long-chain family member 1	3.24665	0.00047773
GO_MICROBODY	122970	ACOT4	acyl-CoA thioesterase 4	3.38432	0.00368984
GO_MICROBODY	224	ALDH3A2	aldehyde dehydrogenase 3 family, member A2	3.5243	0.00086725
GO_MICROBODY	2053	EPHX2	epoxide hydrolase 2, cytoplasmic	2.12978	0.000393204
GO_MICROBODY	10901	DHRS4	dehydrogenase/reductase (SDR family) member 4	1.58677	0.00312422
GO_MICROBODY	1891	ECH1	enoyl CoA hydratase 1, peroxisomal	1.6658	0.00260057
GO_MICROBODY	54677	CROT	carnitine O-octanoyltransferase	1.87563	0.000840794
GO_MICROBODY	26063	DECR2	2,4-dienoyl CoA reductase 2, peroxisomal	1.90336	0.004052
GO_MICROBODY	84263	HSDL2	hydroxysteroid dehydrogenase like 2	2.03511	0.000666637
GO_MICROBODY	3422	IDI1	isopentenyl-diphosphate delta isomerase 1	-3.14131	0.000814091
GO_MICROBODY	225	ABCD2	ATP-binding cassette, sub-family D (ALD), member 2	1.80682	0.0319243
GO_MICROBODY	11264	PXMP4	peroxisomal membrane protein 4, 24kDa	3.12407	0.000191708
GO_MICROBODY	283927	NUDT7	nudix (nucleoside diphosphate linked moiety X)-type motif 7	-2.17292	0.0458252
GO_MICROBODY	5189	PEX1	peroxisomal biogenesis factor 1	1.57736	0.000796385
GO_MICROBODY	3156	HMGCR	3-hydroxy-3-methylglutaryl-CoA reductase	-1.61115	0.0191748
GO_MICROBODY	34	ACADM	acyl-CoA dehydrogenase, C-4 to C-12 straight chain	1.99474	0.000454357
GO_MICROBODY	3295	HSD17B4	hydroxysteroid (17-beta) dehydrogenase 4	1.58035	0.000403005
GO_MICROBODY	1384	CRAT	carnitine O-acetyltransferase	2.85378	0.00285356
GO_MICROBODY	10247	HRSP12	heat-responsive protein 12	1.55689	0.00155555
GO_MICROBODY	51	ACOX1	acyl-CoA oxidase 1, palmitoyl	1.66627	0.00242207
GO_MICROBODY	26061	HACL1	2-hydroxyacyl-CoA lyase 1	2.10651	0.000775308
GO_ENDOPLASMIC_RETICULUM_PART	10954	PDIA5	protein disulfide isomerase family A, member 5	-1.51962	0.0279201
GO_ENDOPLASMIC_RETICULUM_PART	1718	DHCR24	24-dehydrocholesterol reductase	-1.58136	0.0182725
GO_ENDOPLASMIC_RETICULUM_PART	10901	DHRS4	dehydrogenase/reductase (SDR family) member 4	1.58677	0.00312422
GO_ENDOPLASMIC_RETICULUM_PART	50999	TMED5	transmembrane emp24 protein transport domain containing 5	1.55305	0.0019467
GO_ENDOPLASMIC_RETICULUM_PART	3290	HSD11B1	hydroxysteroid (11-beta) dehydrogenase 1	1.5875	0.00360464
GO_ENDOPLASMIC_RETICULUM_PART	79087	ALG12	asparagine-linked glycosylation 12, alpha-1,6-mannosyltransferase homolog (S. cerevisiae)	1.55588	0.0161877
GO_ENDOPLASMIC_RETICULUM_PART	10483	SEC23B	Sec23 homolog B (S. cerevisiae)	1.62665	0.0425813
GO_ENDOPLASMIC_RETICULUM_PART	2590	GALNT2	UDP-N-acetyl-alpha-D-galactosamine:polypeptide N-acetylgalactosaminyltransferase 2 (GalNAc-T2)	1.58888	0.00242936
GO_ENDOPLASMIC_RETICULUM_PART	488	ATP2A2	ATPase, Ca++ transporting, cardiac muscle, slow twitch 2	1.91167	0.00039089
GO_ENDOPLASMIC_RETICULUM_PART	10555	AGPAT2	1-acylglycerol-3-phosphate O-acyltransferase 2 (lysophosphatidic acid acyltransferase, beta)	1.89944	0.00515849
GO_ENDOPLASMIC_RETICULUM_PART	133688	UGT3A1	UDP glycosyltransferase 3 family, polypeptide A1	1.59242	0.000962368
GO_ENDOPLASMIC_RETICULUM_PART	10400	PEMT	phosphatidylethanolamine N-methyltransferase	1.51585	0.0193472
GO_ENDOPLASMIC_RETICULUM_PART	201595	STT3B	STT3, subunit of the oligosaccharyltransferase complex, homolog B (S. cerevisiae)	1.72235	0.00723731
GO_ENDOPLASMIC_RETICULUM_PART	64225	ATL2	atlastin GTPase 2	1.51819	0.00451149
GO_ENDOPLASMIC_RETICULUM_PART	9367	RAB9A	RAB9A, member RAS oncogene family	1.56683	0.0121649
GO_ENDOPLASMIC_RETICULUM_PART	2531	KDSR	3-ketodihydrosphingosine reductase	1.50092	0.00438066
GO_ENDOPLASMIC_RETICULUM_PART	3156	HMGCR	3-hydroxy-3-methylglutaryl-CoA reductase	-1.61115	0.0191748
GO_ENDOPLASMIC_RETICULUM_PART	56246	MRAP	melanocortin 2 receptor accessory protein	1.83763	0.00151645
GO_ENDOPLASMIC_RETICULUM_PART	1595	CYP51A1	cytochrome P450, family 51, subfamily A, polypeptide 1	-2.46406	0.00328032
GO_ENDOPLASMIC_RETICULUM_PART	6713	SQLE	squalene epoxidase	-2.98702	0.00195107
GO_ENDOPLASMIC_RETICULUM_PART	161247	FITM1	fat storage-inducing transmembrane protein 1	1.84418	0.00727275
GO_ENDOPLASMIC_RETICULUM_PART	128486	FITM2	fat storage-inducing transmembrane protein 2	1.79922	0.00138607
GO_ENDOPLASMIC_RETICULUM_PART	2052	EPHX1	epoxide hydrolase 1, microsomal (xenobiotic)	2.1115	0.00232446
GO_ENDOPLASMIC_RETICULUM_PART	2984	GUCY2C	guanylate cyclase 2C (heat stable enterotoxin receptor)	-1.67592	0.0313742
GO_ENDOPLASMIC_RETICULUM_PART	51302	CYP39A1	cytochrome P450, family 39, subfamily A, polypeptide 1	2.42464	0.00251403
GO_ENDOPLASMIC_RETICULUM_PART	1580	CYP4B1	cytochrome P450, family 4, subfamily B, polypeptide 1	1.52747	0.0026546
GO_ENDOPLASMIC_RETICULUM_PART	2157	F8	coagulation factor VIII, procoagulant component	1.54088	0.0141895
GO_ENDOPLASMIC_RETICULUM_PART	590	BCHE	butyrylcholinesterase	1.63658	0.000631726
GO_ENDOPLASMIC_RETICULUM_PART	972	CD74	CD74 molecule, major histocompatibility complex, class II invariant chain	2.00907	0.00446325
GO_ENDOPLASMIC_RETICULUM_PART	3309	HSPA5	heat shock 70kDa protein 5 (glucose-regulated protein, 78kDa)	1.50922	0.0237466
GO_ENDOPLASMIC_RETICULUM_PART	128869	PIGU	phosphatidylinositol glycan anchor biosynthesis, class U	1.72966	0.00213706
GO_ENDOPLASMIC_RETICULUM_PART	392636	AGMO	alkylglycerol monooxygenase	1.78901	0.00121152
GO_ENDOPLASMIC_RETICULUM_PART	2326	FMO1	flavin containing monooxygenase 1	1.84427	0.000408961
GO_ENDOPLASMIC_RETICULUM_PART	60481	ELOVL5	ELOVL fatty acid elongase 5	2.31279	0.00910325
GO_ENDOPLASMIC_RETICULUM_PART	83401	ELOVL3	ELOVL fatty acid elongase 3	6.40236	0.00054127
GO_ENDOPLASMIC_RETICULUM_PART	54884	RETSAT	retinol saturase (all-trans-retinol 13,14-reductase)	4.89906	9.08576e-05
GO_ENDOPLASMIC_RETICULUM_PART	2621	GAS6	growth arrest-specific 6	-2.46472	0.00347183
GO_ENDOPLASMIC_RETICULUM_PART	10195	ALG3	asparagine-linked glycosylation 3, alpha-1,3- mannosyltransferase homolog (S. cerevisiae)	1.6181	0.0213585
GO_ENDOPLASMIC_RETICULUM_PART	11343	MGLL	monoglyceride lipase	1.86235	0.00245045
GO_ENDOPLASMIC_RETICULUM_PART	51128	SAR1B	SAR1 homolog B (S. cerevisiae)	1.62151	0.0006586
GO_ENDOPLASMIC_RETICULUM_PART	50814	NSDHL	NAD(P) dependent steroid dehydrogenase-like	-2.14416	0.00831368
GO_ENDOPLASMIC_RETICULUM_PART	51246	SHISA5	shisa homolog 5 (Xenopus laevis)	-1.99195	0.000136461
GO_ENDOPLASMIC_RETICULUM_PART	1603	DAD1	defender against cell death 1	1.9138	0.00850953
GO_ENDOPLASMIC_RETICULUM_PART	6400	SEL1L	sel-1 suppressor of lin-12-like (C. elegans)	1.5051	0.00447047
GO_ENDOPLASMIC_RETICULUM_PART	57104	PNPLA2	patatin-like phospholipase domain containing 2	1.81129	0.022903
GO_ENDOPLASMIC_RETICULUM_PART	3162	HMOX1	heme oxygenase (decycling) 1	1.56257	0.0232432
GO_ENDOPLASMIC_RETICULUM_PART	92840	REEP6	receptor accessory protein 6	1.63434	0.00501919
GO_ENDOPLASMIC_RETICULUM_PART	4547	MTTP	microsomal triglyceride transfer protein	1.58083	0.000395105
GO_ENDOPLASMIC_RETICULUM_PART	1582	CYP8B1	cytochrome P450, family 8, subfamily B, polypeptide 1	3.55399	0.00785468
GO_ENDOPLASMIC_RETICULUM_PART	51703	ACSL5	acyl-CoA synthetase long-chain family member 5	1.6176	0.000648662
GO_ENDOPLASMIC_RETICULUM_PART	8608	RDH16	retinol dehydrogenase 16 (all-trans)	1.6667	0.00456152
GO_ENDOPLASMIC_RETICULUM_PART	7363	UGT2B4	UDP glucuronosyltransferase 2 family, polypeptide B4	1.69942	0.0412316
GO_ENDOPLASMIC_RETICULUM_PART	2180	ACSL1	acyl-CoA synthetase long-chain family member 1	3.24665	0.00047773
GO_ENDOPLASMIC_RETICULUM_PART	224	ALDH3A2	aldehyde dehydrogenase 3 family, member A2	3.5243	0.00086725
GO_ENDOPLASMIC_RETICULUM_PART	84447	SYVN1	synovial apoptosis inhibitor 1, synoviolin	1.65736	0.00317976
GO_ENDOPLASMIC_RETICULUM_PART	51141	INSIG2	insulin induced gene 2	4.51312	0.000275459
GO_ENDOPLASMIC_RETICULUM_PART	1576	CYP3A4	cytochrome P450, family 3, subfamily A, polypeptide 4	2.18741	0.000111938
GO_NUCLEAR_OUTER_MEMBRANE_ENDOPLASMIC_RETICULUM_MEMBRANE_NETWORK	224	ALDH3A2	aldehyde dehydrogenase 3 family, member A2	3.5243	0.00086725
GO_NUCLEAR_OUTER_MEMBRANE_ENDOPLASMIC_RETICULUM_MEMBRANE_NETWORK	84447	SYVN1	synovial apoptosis inhibitor 1, synoviolin	1.65736	0.00317976
GO_NUCLEAR_OUTER_MEMBRANE_ENDOPLASMIC_RETICULUM_MEMBRANE_NETWORK	51141	INSIG2	insulin induced gene 2	4.51312	0.000275459
GO_NUCLEAR_OUTER_MEMBRANE_ENDOPLASMIC_RETICULUM_MEMBRANE_NETWORK	1576	CYP3A4	cytochrome P450, family 3, subfamily A, polypeptide 4	2.18741	0.000111938
GO_NUCLEAR_OUTER_MEMBRANE_ENDOPLASMIC_RETICULUM_MEMBRANE_NETWORK	51246	SHISA5	shisa homolog 5 (Xenopus laevis)	-1.99195	0.000136461
GO_NUCLEAR_OUTER_MEMBRANE_ENDOPLASMIC_RETICULUM_MEMBRANE_NETWORK	57104	PNPLA2	patatin-like phospholipase domain containing 2	1.81129	0.022903
GO_NUCLEAR_OUTER_MEMBRANE_ENDOPLASMIC_RETICULUM_MEMBRANE_NETWORK	6400	SEL1L	sel-1 suppressor of lin-12-like (C. elegans)	1.5051	0.00447047
GO_NUCLEAR_OUTER_MEMBRANE_ENDOPLASMIC_RETICULUM_MEMBRANE_NETWORK	1603	DAD1	defender against cell death 1	1.9138	0.00850953
GO_NUCLEAR_OUTER_MEMBRANE_ENDOPLASMIC_RETICULUM_MEMBRANE_NETWORK	3162	HMOX1	heme oxygenase (decycling) 1	1.56257	0.0232432
GO_NUCLEAR_OUTER_MEMBRANE_ENDOPLASMIC_RETICULUM_MEMBRANE_NETWORK	92840	REEP6	receptor accessory protein 6	1.63434	0.00501919
GO_NUCLEAR_OUTER_MEMBRANE_ENDOPLASMIC_RETICULUM_MEMBRANE_NETWORK	1582	CYP8B1	cytochrome P450, family 8, subfamily B, polypeptide 1	3.55399	0.00785468
GO_NUCLEAR_OUTER_MEMBRANE_ENDOPLASMIC_RETICULUM_MEMBRANE_NETWORK	51703	ACSL5	acyl-CoA synthetase long-chain family member 5	1.6176	0.000648662
GO_NUCLEAR_OUTER_MEMBRANE_ENDOPLASMIC_RETICULUM_MEMBRANE_NETWORK	8608	RDH16	retinol dehydrogenase 16 (all-trans)	1.6667	0.00456152
GO_NUCLEAR_OUTER_MEMBRANE_ENDOPLASMIC_RETICULUM_MEMBRANE_NETWORK	7363	UGT2B4	UDP glucuronosyltransferase 2 family, polypeptide B4	1.69942	0.0412316
GO_NUCLEAR_OUTER_MEMBRANE_ENDOPLASMIC_RETICULUM_MEMBRANE_NETWORK	2180	ACSL1	acyl-CoA synthetase long-chain family member 1	3.24665	0.00047773
GO_NUCLEAR_OUTER_MEMBRANE_ENDOPLASMIC_RETICULUM_MEMBRANE_NETWORK	392636	AGMO	alkylglycerol monooxygenase	1.78901	0.00121152
GO_NUCLEAR_OUTER_MEMBRANE_ENDOPLASMIC_RETICULUM_MEMBRANE_NETWORK	2326	FMO1	flavin containing monooxygenase 1	1.84427	0.000408961
GO_NUCLEAR_OUTER_MEMBRANE_ENDOPLASMIC_RETICULUM_MEMBRANE_NETWORK	60481	ELOVL5	ELOVL fatty acid elongase 5	2.31279	0.00910325
GO_NUCLEAR_OUTER_MEMBRANE_ENDOPLASMIC_RETICULUM_MEMBRANE_NETWORK	83401	ELOVL3	ELOVL fatty acid elongase 3	6.40236	0.00054127
GO_NUCLEAR_OUTER_MEMBRANE_ENDOPLASMIC_RETICULUM_MEMBRANE_NETWORK	54884	RETSAT	retinol saturase (all-trans-retinol 13,14-reductase)	4.89906	9.08576e-05
GO_NUCLEAR_OUTER_MEMBRANE_ENDOPLASMIC_RETICULUM_MEMBRANE_NETWORK	10195	ALG3	asparagine-linked glycosylation 3, alpha-1,3- mannosyltransferase homolog (S. cerevisiae)	1.6181	0.0213585
GO_NUCLEAR_OUTER_MEMBRANE_ENDOPLASMIC_RETICULUM_MEMBRANE_NETWORK	51128	SAR1B	SAR1 homolog B (S. cerevisiae)	1.62151	0.0006586
GO_NUCLEAR_OUTER_MEMBRANE_ENDOPLASMIC_RETICULUM_MEMBRANE_NETWORK	11343	MGLL	monoglyceride lipase	1.86235	0.00245045
GO_NUCLEAR_OUTER_MEMBRANE_ENDOPLASMIC_RETICULUM_MEMBRANE_NETWORK	50814	NSDHL	NAD(P) dependent steroid dehydrogenase-like	-2.14416	0.00831368
GO_NUCLEAR_OUTER_MEMBRANE_ENDOPLASMIC_RETICULUM_MEMBRANE_NETWORK	2052	EPHX1	epoxide hydrolase 1, microsomal (xenobiotic)	2.1115	0.00232446
GO_NUCLEAR_OUTER_MEMBRANE_ENDOPLASMIC_RETICULUM_MEMBRANE_NETWORK	2984	GUCY2C	guanylate cyclase 2C (heat stable enterotoxin receptor)	-1.67592	0.0313742
GO_NUCLEAR_OUTER_MEMBRANE_ENDOPLASMIC_RETICULUM_MEMBRANE_NETWORK	51302	CYP39A1	cytochrome P450, family 39, subfamily A, polypeptide 1	2.42464	0.00251403
GO_NUCLEAR_OUTER_MEMBRANE_ENDOPLASMIC_RETICULUM_MEMBRANE_NETWORK	1580	CYP4B1	cytochrome P450, family 4, subfamily B, polypeptide 1	1.52747	0.0026546
GO_NUCLEAR_OUTER_MEMBRANE_ENDOPLASMIC_RETICULUM_MEMBRANE_NETWORK	972	CD74	CD74 molecule, major histocompatibility complex, class II invariant chain	2.00907	0.00446325
GO_NUCLEAR_OUTER_MEMBRANE_ENDOPLASMIC_RETICULUM_MEMBRANE_NETWORK	3309	HSPA5	heat shock 70kDa protein 5 (glucose-regulated protein, 78kDa)	1.50922	0.0237466
GO_NUCLEAR_OUTER_MEMBRANE_ENDOPLASMIC_RETICULUM_MEMBRANE_NETWORK	128869	PIGU	phosphatidylinositol glycan anchor biosynthesis, class U	1.72966	0.00213706
GO_NUCLEAR_OUTER_MEMBRANE_ENDOPLASMIC_RETICULUM_MEMBRANE_NETWORK	6713	SQLE	squalene epoxidase	-2.98702	0.00195107
GO_NUCLEAR_OUTER_MEMBRANE_ENDOPLASMIC_RETICULUM_MEMBRANE_NETWORK	161247	FITM1	fat storage-inducing transmembrane protein 1	1.84418	0.00727275
GO_NUCLEAR_OUTER_MEMBRANE_ENDOPLASMIC_RETICULUM_MEMBRANE_NETWORK	128486	FITM2	fat storage-inducing transmembrane protein 2	1.79922	0.00138607
GO_NUCLEAR_OUTER_MEMBRANE_ENDOPLASMIC_RETICULUM_MEMBRANE_NETWORK	201595	STT3B	STT3, subunit of the oligosaccharyltransferase complex, homolog B (S. cerevisiae)	1.72235	0.00723731
GO_NUCLEAR_OUTER_MEMBRANE_ENDOPLASMIC_RETICULUM_MEMBRANE_NETWORK	64225	ATL2	atlastin GTPase 2	1.51819	0.00451149
GO_NUCLEAR_OUTER_MEMBRANE_ENDOPLASMIC_RETICULUM_MEMBRANE_NETWORK	9367	RAB9A	RAB9A, member RAS oncogene family	1.56683	0.0121649
GO_NUCLEAR_OUTER_MEMBRANE_ENDOPLASMIC_RETICULUM_MEMBRANE_NETWORK	2531	KDSR	3-ketodihydrosphingosine reductase	1.50092	0.00438066
GO_NUCLEAR_OUTER_MEMBRANE_ENDOPLASMIC_RETICULUM_MEMBRANE_NETWORK	3156	HMGCR	3-hydroxy-3-methylglutaryl-CoA reductase	-1.61115	0.0191748
GO_NUCLEAR_OUTER_MEMBRANE_ENDOPLASMIC_RETICULUM_MEMBRANE_NETWORK	56246	MRAP	melanocortin 2 receptor accessory protein	1.83763	0.00151645
GO_NUCLEAR_OUTER_MEMBRANE_ENDOPLASMIC_RETICULUM_MEMBRANE_NETWORK	1595	CYP51A1	cytochrome P450, family 51, subfamily A, polypeptide 1	-2.46406	0.00328032
GO_NUCLEAR_OUTER_MEMBRANE_ENDOPLASMIC_RETICULUM_MEMBRANE_NETWORK	10483	SEC23B	Sec23 homolog B (S. cerevisiae)	1.62665	0.0425813
GO_NUCLEAR_OUTER_MEMBRANE_ENDOPLASMIC_RETICULUM_MEMBRANE_NETWORK	2590	GALNT2	UDP-N-acetyl-alpha-D-galactosamine:polypeptide N-acetylgalactosaminyltransferase 2 (GalNAc-T2)	1.58888	0.00242936
GO_NUCLEAR_OUTER_MEMBRANE_ENDOPLASMIC_RETICULUM_MEMBRANE_NETWORK	488	ATP2A2	ATPase, Ca++ transporting, cardiac muscle, slow twitch 2	1.91167	0.00039089
GO_NUCLEAR_OUTER_MEMBRANE_ENDOPLASMIC_RETICULUM_MEMBRANE_NETWORK	10555	AGPAT2	1-acylglycerol-3-phosphate O-acyltransferase 2 (lysophosphatidic acid acyltransferase, beta)	1.89944	0.00515849
GO_NUCLEAR_OUTER_MEMBRANE_ENDOPLASMIC_RETICULUM_MEMBRANE_NETWORK	133688	UGT3A1	UDP glycosyltransferase 3 family, polypeptide A1	1.59242	0.000962368
GO_NUCLEAR_OUTER_MEMBRANE_ENDOPLASMIC_RETICULUM_MEMBRANE_NETWORK	10400	PEMT	phosphatidylethanolamine N-methyltransferase	1.51585	0.0193472
GO_NUCLEAR_OUTER_MEMBRANE_ENDOPLASMIC_RETICULUM_MEMBRANE_NETWORK	10954	PDIA5	protein disulfide isomerase family A, member 5	-1.51962	0.0279201
GO_NUCLEAR_OUTER_MEMBRANE_ENDOPLASMIC_RETICULUM_MEMBRANE_NETWORK	1718	DHCR24	24-dehydrocholesterol reductase	-1.58136	0.0182725
GO_NUCLEAR_OUTER_MEMBRANE_ENDOPLASMIC_RETICULUM_MEMBRANE_NETWORK	10901	DHRS4	dehydrogenase/reductase (SDR family) member 4	1.58677	0.00312422
GO_NUCLEAR_OUTER_MEMBRANE_ENDOPLASMIC_RETICULUM_MEMBRANE_NETWORK	50999	TMED5	transmembrane emp24 protein transport domain containing 5	1.55305	0.0019467
GO_NUCLEAR_OUTER_MEMBRANE_ENDOPLASMIC_RETICULUM_MEMBRANE_NETWORK	3290	HSD11B1	hydroxysteroid (11-beta) dehydrogenase 1	1.5875	0.00360464
GO_NUCLEAR_OUTER_MEMBRANE_ENDOPLASMIC_RETICULUM_MEMBRANE_NETWORK	79087	ALG12	asparagine-linked glycosylation 12, alpha-1,6-mannosyltransferase homolog (S. cerevisiae)	1.55588	0.0161877
GO_MICROBODY_PART	10901	DHRS4	dehydrogenase/reductase (SDR family) member 4	1.58677	0.00312422
GO_MICROBODY_PART	54677	CROT	carnitine O-octanoyltransferase	1.87563	0.000840794
GO_MICROBODY_PART	26063	DECR2	2,4-dienoyl CoA reductase 2, peroxisomal	1.90336	0.004052
GO_MICROBODY_PART	225	ABCD2	ATP-binding cassette, sub-family D (ALD), member 2	1.80682	0.0319243
GO_MICROBODY_PART	11264	PXMP4	peroxisomal membrane protein 4, 24kDa	3.12407	0.000191708
GO_MICROBODY_PART	283927	NUDT7	nudix (nucleoside diphosphate linked moiety X)-type motif 7	-2.17292	0.0458252
GO_MICROBODY_PART	3156	HMGCR	3-hydroxy-3-methylglutaryl-CoA reductase	-1.61115	0.0191748
GO_MICROBODY_PART	5189	PEX1	peroxisomal biogenesis factor 1	1.57736	0.000796385
GO_MICROBODY_PART	3295	HSD17B4	hydroxysteroid (17-beta) dehydrogenase 4	1.58035	0.000403005
GO_MICROBODY_PART	51	ACOX1	acyl-CoA oxidase 1, palmitoyl	1.66627	0.00242207
GO_MICROBODY_PART	26061	HACL1	2-hydroxyacyl-CoA lyase 1	2.10651	0.000775308
GO_MICROBODY_PART	1384	CRAT	carnitine O-acetyltransferase	2.85378	0.00285356
GO_MICROBODY_PART	5825	ABCD3	ATP-binding cassette, sub-family D (ALD), member 3	1.6066	0.00182228
GO_MICROBODY_PART	847	CAT	catalase	1.60446	0.00171348
GO_MICROBODY_PART	8800	PEX11A	peroxisomal biogenesis factor 11 alpha	3.57288	0.000654153
GO_MICROBODY_PART	10455	ECI2	enoyl-CoA delta isomerase 2	1.74498	0.00178871
GO_MICROBODY_PART	2180	ACSL1	acyl-CoA synthetase long-chain family member 1	3.24665	0.00047773
GO_MICROBODY_PART	1962	EHHADH	enoyl-CoA, hydratase/3-hydroxyacyl CoA dehydrogenase	9.64907	0.000126974
GO_MICROBODY_PART	122970	ACOT4	acyl-CoA thioesterase 4	3.38432	0.00368984
GO_MICROBODY_PART	224	ALDH3A2	aldehyde dehydrogenase 3 family, member A2	3.5243	0.00086725
GO_MITOCHONDRIAL_PART	3033	HADH	hydroxyacyl-CoA dehydrogenase	1.52063	0.000393585
GO_MITOCHONDRIAL_PART	2356	FPGS	folylpolyglutamate synthase	1.56811	0.000276656
GO_MITOCHONDRIAL_PART	34	ACADM	acyl-CoA dehydrogenase, C-4 to C-12 straight chain	1.99474	0.000454357
GO_MITOCHONDRIAL_PART	10845	CLPX	ClpX caseinolytic peptidase X homolog (E. coli)	3.21089	0.00030944
GO_MITOCHONDRIAL_PART	1384	CRAT	carnitine O-acetyltransferase	2.85378	0.00285356
GO_MITOCHONDRIAL_PART	6821	SUOX	sulfite oxidase	1.57706	0.00517778
GO_MITOCHONDRIAL_PART	1632	ECI1	enoyl-CoA delta isomerase 1	1.7211	0.00210442
GO_MITOCHONDRIAL_PART	841	CASP8	caspase 8, apoptosis-related cysteine peptidase	1.73114	0.0138296
GO_MITOCHONDRIAL_PART	10965	ACOT2	acyl-CoA thioesterase 2	4.63269	0.0062207
GO_MITOCHONDRIAL_PART	134266	GRPEL2	GrpE-like 2, mitochondrial (E. coli)	1.52803	0.00612424
GO_MITOCHONDRIAL_PART	3158	HMGCS2	3-hydroxy-3-methylglutaryl-CoA synthase 2 (mitochondrial)	1.69489	0.00079222
GO_MITOCHONDRIAL_PART	10400	PEMT	phosphatidylethanolamine N-methyltransferase	1.51585	0.0193472
GO_MITOCHONDRIAL_PART	10628	TXNIP	thioredoxin interacting protein	1.88228	0.0465122
GO_MITOCHONDRIAL_PART	9997	SCO2	SCO cytochrome oxidase deficient homolog 2 (yeast)	2.07655	0.0062045
GO_MITOCHONDRIAL_PART	51703	ACSL5	acyl-CoA synthetase long-chain family member 5	1.6176	0.000648662
GO_MITOCHONDRIAL_PART	5166	PDK4	pyruvate dehydrogenase kinase, isozyme 4	4.66084	0.00209195
GO_MITOCHONDRIAL_PART	4715	NDUFB9	NADH dehydrogenase (ubiquinone) 1 beta subcomplex, 9, 22kDa	1.63818	0.0326675
GO_MITOCHONDRIAL_PART	2180	ACSL1	acyl-CoA synthetase long-chain family member 1	3.24665	0.00047773
GO_MITOCHONDRIAL_PART	51166	AADAT	aminoadipate aminotransferase	1.53724	0.0176972
GO_MITOCHONDRIAL_PART	4129	MAOB	monoamine oxidase B	1.63753	0.00256494
GO_MITOCHONDRIAL_PART	2710	GK	glycerol kinase	1.6816	0.0019605
GO_MITOCHONDRIAL_PART	224	ALDH3A2	aldehyde dehydrogenase 3 family, member A2	3.5243	0.00086725
GO_MITOCHONDRIAL_PART	23788	MTCH2	mitochondrial carrier 2	1.52655	0.0120035
GO_MITOCHONDRIAL_PART	38	ACAT1	acetyl-CoA acetyltransferase 1	1.77339	0.000855305
GO_MITOCHONDRIAL_PART	1376	CPT2	carnitine palmitoyltransferase 2	2.1735	0.00144014
GO_MITOCHONDRIAL_PART	4329	ALDH6A1	aldehyde dehydrogenase 6 family, member A1	1.55718	0.0130025
GO_MITOCHONDRIAL_PART	2820	GPD2	glycerol-3-phosphate dehydrogenase 2 (mitochondrial)	1.58725	0.0356215
GO_MITOCHONDRIAL_PART	1371	CPOX	coproporphyrinogen oxidase	1.91579	0.000180559
GO_MITOCHONDRIAL_PART	6391	SDHC	succinate dehydrogenase complex, subunit C, integral membrane protein, 15kDa	1.62795	0.00613126
GO_MITOCHONDRIAL_PART	847	CAT	catalase	1.60446	0.00171348
GO_MITOCHONDRIAL_PART	788	SLC25A20	solute carrier family 25 (carnitine/acylcarnitine translocase), member 20	2.22906	8.36687e-05
GO_MITOCHONDRIAL_PART	3030	HADHA	hydroxyacyl-CoA dehydrogenase/3-ketoacyl-CoA thiolase/enoyl-CoA hydratase (trifunctional protein), alpha subunit	1.54394	0.000306471
GO_MITOCHONDRIAL_PART	9429	ABCG2	ATP-binding cassette, sub-family G (WHITE), member 2	1.80371	0.00152641
GO_MITOCHONDRIAL_PART	5825	ABCD3	ATP-binding cassette, sub-family D (ALD), member 3	1.6066	0.00182228
GO_MITOCHONDRIAL_PART	84129	ACAD11	acyl-CoA dehydrogenase family, member 11	1.67146	0.000646651
GO_MITOCHONDRIAL_PART	33	ACADL	acyl-CoA dehydrogenase, long chain	1.72816	0.0028287
GO_MITOCHONDRIAL_PART	2731	GLDC	glycine dehydrogenase (decarboxylating)	2.24637	0.000863899
GO_MITOCHONDRIAL_PART	1375	CPT1B	carnitine palmitoyltransferase 1B (muscle)	1.50418	0.0301416
GO_MITOCHONDRIAL_PART	4696	NDUFA3	NADH dehydrogenase (ubiquinone) 1 alpha subcomplex, 3, 9kDa	1.53457	0.0134308
GO_MITOCHONDRIAL_PART	1666	DECR1	2,4-dienoyl CoA reductase 1, mitochondrial	1.7845	0.000543546
GO_MITOCHONDRIAL_PART	6296	ACSM3	acyl-CoA synthetase medium-chain family member 3	1.55279	0.0151525
GO_MITOCHONDRIAL_PART	192286	HIGD2A	HIG1 hypoxia inducible domain family, member 2A	1.64608	0.030476
GO_MITOCHONDRIAL_PART	3032	HADHB	hydroxyacyl-CoA dehydrogenase/3-ketoacyl-CoA thiolase/enoyl-CoA hydratase (trifunctional protein), beta subunit	1.92885	0.000229025
GO_MITOCHONDRIAL_PART	2110	ETFDH	electron-transferring-flavoprotein dehydrogenase	1.79156	0.00020707
GO_MITOCHONDRIAL_PART	8034	SLC25A16	solute carrier family 25 (mitochondrial carrier; Graves disease autoantigen), member 16	1.5307	0.00723438
GO_MITOCHONDRIAL_ENVELOPE	10845	CLPX	ClpX caseinolytic peptidase X homolog (E. coli)	3.21089	0.00030944
GO_MITOCHONDRIAL_ENVELOPE	1384	CRAT	carnitine O-acetyltransferase	2.85378	0.00285356
GO_MITOCHONDRIAL_ENVELOPE	3033	HADH	hydroxyacyl-CoA dehydrogenase	1.52063	0.000393585
GO_MITOCHONDRIAL_ENVELOPE	2356	FPGS	folylpolyglutamate synthase	1.56811	0.000276656
GO_MITOCHONDRIAL_ENVELOPE	3158	HMGCS2	3-hydroxy-3-methylglutaryl-CoA synthase 2 (mitochondrial)	1.69489	0.00079222
GO_MITOCHONDRIAL_ENVELOPE	134266	GRPEL2	GrpE-like 2, mitochondrial (E. coli)	1.52803	0.00612424
GO_MITOCHONDRIAL_ENVELOPE	10400	PEMT	phosphatidylethanolamine N-methyltransferase	1.51585	0.0193472
GO_MITOCHONDRIAL_ENVELOPE	1632	ECI1	enoyl-CoA delta isomerase 1	1.7211	0.00210442
GO_MITOCHONDRIAL_ENVELOPE	6821	SUOX	sulfite oxidase	1.57706	0.00517778
GO_MITOCHONDRIAL_ENVELOPE	841	CASP8	caspase 8, apoptosis-related cysteine peptidase	1.73114	0.0138296
GO_MITOCHONDRIAL_ENVELOPE	38	ACAT1	acetyl-CoA acetyltransferase 1	1.77339	0.000855305
GO_MITOCHONDRIAL_ENVELOPE	23788	MTCH2	mitochondrial carrier 2	1.52655	0.0120035
GO_MITOCHONDRIAL_ENVELOPE	1376	CPT2	carnitine palmitoyltransferase 2	2.1735	0.00144014
GO_MITOCHONDRIAL_ENVELOPE	4129	MAOB	monoamine oxidase B	1.63753	0.00256494
GO_MITOCHONDRIAL_ENVELOPE	224	ALDH3A2	aldehyde dehydrogenase 3 family, member A2	3.5243	0.00086725
GO_MITOCHONDRIAL_ENVELOPE	2710	GK	glycerol kinase	1.6816	0.0019605
GO_MITOCHONDRIAL_ENVELOPE	2820	GPD2	glycerol-3-phosphate dehydrogenase 2 (mitochondrial)	1.58725	0.0356215
GO_MITOCHONDRIAL_ENVELOPE	10628	TXNIP	thioredoxin interacting protein	1.88228	0.0465122
GO_MITOCHONDRIAL_ENVELOPE	2180	ACSL1	acyl-CoA synthetase long-chain family member 1	3.24665	0.00047773
GO_MITOCHONDRIAL_ENVELOPE	51703	ACSL5	acyl-CoA synthetase long-chain family member 5	1.6176	0.000648662
GO_MITOCHONDRIAL_ENVELOPE	9997	SCO2	SCO cytochrome oxidase deficient homolog 2 (yeast)	2.07655	0.0062045
GO_MITOCHONDRIAL_ENVELOPE	4715	NDUFB9	NADH dehydrogenase (ubiquinone) 1 beta subcomplex, 9, 22kDa	1.63818	0.0326675
GO_MITOCHONDRIAL_ENVELOPE	5166	PDK4	pyruvate dehydrogenase kinase, isozyme 4	4.66084	0.00209195
GO_MITOCHONDRIAL_ENVELOPE	4696	NDUFA3	NADH dehydrogenase (ubiquinone) 1 alpha subcomplex, 3, 9kDa	1.53457	0.0134308
GO_MITOCHONDRIAL_ENVELOPE	1375	CPT1B	carnitine palmitoyltransferase 1B (muscle)	1.50418	0.0301416
GO_MITOCHONDRIAL_ENVELOPE	33	ACADL	acyl-CoA dehydrogenase, long chain	1.72816	0.0028287
GO_MITOCHONDRIAL_ENVELOPE	84129	ACAD11	acyl-CoA dehydrogenase family, member 11	1.67146	0.000646651
GO_MITOCHONDRIAL_ENVELOPE	2110	ETFDH	electron-transferring-flavoprotein dehydrogenase	1.79156	0.00020707
GO_MITOCHONDRIAL_ENVELOPE	8034	SLC25A16	solute carrier family 25 (mitochondrial carrier; Graves disease autoantigen), member 16	1.5307	0.00723438
GO_MITOCHONDRIAL_ENVELOPE	3032	HADHB	hydroxyacyl-CoA dehydrogenase/3-ketoacyl-CoA thiolase/enoyl-CoA hydratase (trifunctional protein), beta subunit	1.92885	0.000229025
GO_MITOCHONDRIAL_ENVELOPE	192286	HIGD2A	HIG1 hypoxia inducible domain family, member 2A	1.64608	0.030476
GO_MITOCHONDRIAL_ENVELOPE	6391	SDHC	succinate dehydrogenase complex, subunit C, integral membrane protein, 15kDa	1.62795	0.00613126
GO_MITOCHONDRIAL_ENVELOPE	1371	CPOX	coproporphyrinogen oxidase	1.91579	0.000180559
GO_MITOCHONDRIAL_ENVELOPE	5825	ABCD3	ATP-binding cassette, sub-family D (ALD), member 3	1.6066	0.00182228
GO_MITOCHONDRIAL_ENVELOPE	788	SLC25A20	solute carrier family 25 (carnitine/acylcarnitine translocase), member 20	2.22906	8.36687e-05
GO_MITOCHONDRIAL_ENVELOPE	847	CAT	catalase	1.60446	0.00171348
GO_MITOCHONDRIAL_ENVELOPE	9429	ABCG2	ATP-binding cassette, sub-family G (WHITE), member 2	1.80371	0.00152641
GO_MITOCHONDRIAL_ENVELOPE	3030	HADHA	hydroxyacyl-CoA dehydrogenase/3-ketoacyl-CoA thiolase/enoyl-CoA hydratase (trifunctional protein), alpha subunit	1.54394	0.000306471
GO_ENVELOPE	5825	ABCD3	ATP-binding cassette, sub-family D (ALD), member 3	1.6066	0.00182228
GO_ENVELOPE	847	CAT	catalase	1.60446	0.00171348
GO_ENVELOPE	788	SLC25A20	solute carrier family 25 (carnitine/acylcarnitine translocase), member 20	2.22906	8.36687e-05
GO_ENVELOPE	9429	ABCG2	ATP-binding cassette, sub-family G (WHITE), member 2	1.80371	0.00152641
GO_ENVELOPE	3030	HADHA	hydroxyacyl-CoA dehydrogenase/3-ketoacyl-CoA thiolase/enoyl-CoA hydratase (trifunctional protein), alpha subunit	1.54394	0.000306471
GO_ENVELOPE	590	BCHE	butyrylcholinesterase	1.63658	0.000631726
GO_ENVELOPE	6391	SDHC	succinate dehydrogenase complex, subunit C, integral membrane protein, 15kDa	1.62795	0.00613126
GO_ENVELOPE	1371	CPOX	coproporphyrinogen oxidase	1.91579	0.000180559
GO_ENVELOPE	2110	ETFDH	electron-transferring-flavoprotein dehydrogenase	1.79156	0.00020707
GO_ENVELOPE	8034	SLC25A16	solute carrier family 25 (mitochondrial carrier; Graves disease autoantigen), member 16	1.5307	0.00723438
GO_ENVELOPE	54884	RETSAT	retinol saturase (all-trans-retinol 13,14-reductase)	4.89906	9.08576e-05
GO_ENVELOPE	192286	HIGD2A	HIG1 hypoxia inducible domain family, member 2A	1.64608	0.030476
GO_ENVELOPE	3032	HADHB	hydroxyacyl-CoA dehydrogenase/3-ketoacyl-CoA thiolase/enoyl-CoA hydratase (trifunctional protein), beta subunit	1.92885	0.000229025
GO_ENVELOPE	4696	NDUFA3	NADH dehydrogenase (ubiquinone) 1 alpha subcomplex, 3, 9kDa	1.53457	0.0134308
GO_ENVELOPE	1375	CPT1B	carnitine palmitoyltransferase 1B (muscle)	1.50418	0.0301416
GO_ENVELOPE	33	ACADL	acyl-CoA dehydrogenase, long chain	1.72816	0.0028287
GO_ENVELOPE	84129	ACAD11	acyl-CoA dehydrogenase family, member 11	1.67146	0.000646651
GO_ENVELOPE	2180	ACSL1	acyl-CoA synthetase long-chain family member 1	3.24665	0.00047773
GO_ENVELOPE	51703	ACSL5	acyl-CoA synthetase long-chain family member 5	1.6176	0.000648662
GO_ENVELOPE	9997	SCO2	SCO cytochrome oxidase deficient homolog 2 (yeast)	2.07655	0.0062045
GO_ENVELOPE	4715	NDUFB9	NADH dehydrogenase (ubiquinone) 1 beta subcomplex, 9, 22kDa	1.63818	0.0326675
GO_ENVELOPE	5166	PDK4	pyruvate dehydrogenase kinase, isozyme 4	4.66084	0.00209195
GO_ENVELOPE	10628	TXNIP	thioredoxin interacting protein	1.88228	0.0465122
GO_ENVELOPE	51246	SHISA5	shisa homolog 5 (Xenopus laevis)	-1.99195	0.000136461
GO_ENVELOPE	2820	GPD2	glycerol-3-phosphate dehydrogenase 2 (mitochondrial)	1.58725	0.0356215
GO_ENVELOPE	38	ACAT1	acetyl-CoA acetyltransferase 1	1.77339	0.000855305
GO_ENVELOPE	23788	MTCH2	mitochondrial carrier 2	1.52655	0.0120035
GO_ENVELOPE	1376	CPT2	carnitine palmitoyltransferase 2	2.1735	0.00144014
GO_ENVELOPE	25909	AHCTF1	AT hook containing transcription factor 1	1.66848	0.00167813
GO_ENVELOPE	4129	MAOB	monoamine oxidase B	1.63753	0.00256494
GO_ENVELOPE	224	ALDH3A2	aldehyde dehydrogenase 3 family, member A2	3.5243	0.00086725
GO_ENVELOPE	2710	GK	glycerol kinase	1.6816	0.0019605
GO_ENVELOPE	57462	KIAA1161	KIAA1161	-1.56621	0.0078466
GO_ENVELOPE	841	CASP8	caspase 8, apoptosis-related cysteine peptidase	1.73114	0.0138296
GO_ENVELOPE	10901	DHRS4	dehydrogenase/reductase (SDR family) member 4	1.58677	0.00312422
GO_ENVELOPE	1632	ECI1	enoyl-CoA delta isomerase 1	1.7211	0.00210442
GO_ENVELOPE	6821	SUOX	sulfite oxidase	1.57706	0.00517778
GO_ENVELOPE	10400	PEMT	phosphatidylethanolamine N-methyltransferase	1.51585	0.0193472
GO_ENVELOPE	3158	HMGCS2	3-hydroxy-3-methylglutaryl-CoA synthase 2 (mitochondrial)	1.69489	0.00079222
GO_ENVELOPE	134266	GRPEL2	GrpE-like 2, mitochondrial (E. coli)	1.52803	0.00612424
GO_ENVELOPE	9446	GSTO1	glutathione S-transferase omega 1	1.52302	0.00912031
GO_ENVELOPE	2356	FPGS	folylpolyglutamate synthase	1.56811	0.000276656
GO_ENVELOPE	3033	HADH	hydroxyacyl-CoA dehydrogenase	1.52063	0.000393585
GO_ENVELOPE	9961	MVP	major vault protein	-1.61014	0.00449417
GO_ENVELOPE	1384	CRAT	carnitine O-acetyltransferase	2.85378	0.00285356
GO_ENVELOPE	10845	CLPX	ClpX caseinolytic peptidase X homolog (E. coli)	3.21089	0.00030944
GO_MICROBODY_MEMBRANE	847	CAT	catalase	1.60446	0.00171348
GO_MICROBODY_MEMBRANE	5825	ABCD3	ATP-binding cassette, sub-family D (ALD), member 3	1.6066	0.00182228
GO_MICROBODY_MEMBRANE	8800	PEX11A	peroxisomal biogenesis factor 11 alpha	3.57288	0.000654153
GO_MICROBODY_MEMBRANE	2180	ACSL1	acyl-CoA synthetase long-chain family member 1	3.24665	0.00047773
GO_MICROBODY_MEMBRANE	224	ALDH3A2	aldehyde dehydrogenase 3 family, member A2	3.5243	0.00086725
GO_MICROBODY_MEMBRANE	10901	DHRS4	dehydrogenase/reductase (SDR family) member 4	1.58677	0.00312422
GO_MICROBODY_MEMBRANE	26063	DECR2	2,4-dienoyl CoA reductase 2, peroxisomal	1.90336	0.004052
GO_MICROBODY_MEMBRANE	225	ABCD2	ATP-binding cassette, sub-family D (ALD), member 2	1.80682	0.0319243
GO_MICROBODY_MEMBRANE	11264	PXMP4	peroxisomal membrane protein 4, 24kDa	3.12407	0.000191708
GO_MICROBODY_MEMBRANE	3156	HMGCR	3-hydroxy-3-methylglutaryl-CoA reductase	-1.61115	0.0191748
GO_MICROBODY_MEMBRANE	5189	PEX1	peroxisomal biogenesis factor 1	1.57736	0.000796385
GO_MICROBODY_MEMBRANE	51	ACOX1	acyl-CoA oxidase 1, palmitoyl	1.66627	0.00242207
GO_MICROBODY_MEMBRANE	3295	HSD17B4	hydroxysteroid (17-beta) dehydrogenase 4	1.58035	0.000403005
GO_ORGANELLE_INNER_MEMBRANE	224	ALDH3A2	aldehyde dehydrogenase 3 family, member A2	3.5243	0.00086725
GO_ORGANELLE_INNER_MEMBRANE	4129	MAOB	monoamine oxidase B	1.63753	0.00256494
GO_ORGANELLE_INNER_MEMBRANE	1376	CPT2	carnitine palmitoyltransferase 2	2.1735	0.00144014
GO_ORGANELLE_INNER_MEMBRANE	38	ACAT1	acetyl-CoA acetyltransferase 1	1.77339	0.000855305
GO_ORGANELLE_INNER_MEMBRANE	23788	MTCH2	mitochondrial carrier 2	1.52655	0.0120035
GO_ORGANELLE_INNER_MEMBRANE	2820	GPD2	glycerol-3-phosphate dehydrogenase 2 (mitochondrial)	1.58725	0.0356215
GO_ORGANELLE_INNER_MEMBRANE	4715	NDUFB9	NADH dehydrogenase (ubiquinone) 1 beta subcomplex, 9, 22kDa	1.63818	0.0326675
GO_ORGANELLE_INNER_MEMBRANE	5166	PDK4	pyruvate dehydrogenase kinase, isozyme 4	4.66084	0.00209195
GO_ORGANELLE_INNER_MEMBRANE	51703	ACSL5	acyl-CoA synthetase long-chain family member 5	1.6176	0.000648662
GO_ORGANELLE_INNER_MEMBRANE	9997	SCO2	SCO cytochrome oxidase deficient homolog 2 (yeast)	2.07655	0.0062045
GO_ORGANELLE_INNER_MEMBRANE	84129	ACAD11	acyl-CoA dehydrogenase family, member 11	1.67146	0.000646651
GO_ORGANELLE_INNER_MEMBRANE	4696	NDUFA3	NADH dehydrogenase (ubiquinone) 1 alpha subcomplex, 3, 9kDa	1.53457	0.0134308
GO_ORGANELLE_INNER_MEMBRANE	3032	HADHB	hydroxyacyl-CoA dehydrogenase/3-ketoacyl-CoA thiolase/enoyl-CoA hydratase (trifunctional protein), beta subunit	1.92885	0.000229025
GO_ORGANELLE_INNER_MEMBRANE	192286	HIGD2A	HIG1 hypoxia inducible domain family, member 2A	1.64608	0.030476
GO_ORGANELLE_INNER_MEMBRANE	8034	SLC25A16	solute carrier family 25 (mitochondrial carrier; Graves disease autoantigen), member 16	1.5307	0.00723438
GO_ORGANELLE_INNER_MEMBRANE	2110	ETFDH	electron-transferring-flavoprotein dehydrogenase	1.79156	0.00020707
GO_ORGANELLE_INNER_MEMBRANE	1371	CPOX	coproporphyrinogen oxidase	1.91579	0.000180559
GO_ORGANELLE_INNER_MEMBRANE	6391	SDHC	succinate dehydrogenase complex, subunit C, integral membrane protein, 15kDa	1.62795	0.00613126
GO_ORGANELLE_INNER_MEMBRANE	3030	HADHA	hydroxyacyl-CoA dehydrogenase/3-ketoacyl-CoA thiolase/enoyl-CoA hydratase (trifunctional protein), alpha subunit	1.54394	0.000306471
GO_ORGANELLE_INNER_MEMBRANE	788	SLC25A20	solute carrier family 25 (carnitine/acylcarnitine translocase), member 20	2.22906	8.36687e-05
GO_ORGANELLE_INNER_MEMBRANE	5825	ABCD3	ATP-binding cassette, sub-family D (ALD), member 3	1.6066	0.00182228
GO_ORGANELLE_INNER_MEMBRANE	10845	CLPX	ClpX caseinolytic peptidase X homolog (E. coli)	3.21089	0.00030944
GO_ORGANELLE_INNER_MEMBRANE	1384	CRAT	carnitine O-acetyltransferase	2.85378	0.00285356
GO_ORGANELLE_INNER_MEMBRANE	3033	HADH	hydroxyacyl-CoA dehydrogenase	1.52063	0.000393585
GO_ORGANELLE_INNER_MEMBRANE	2356	FPGS	folylpolyglutamate synthase	1.56811	0.000276656
GO_ORGANELLE_INNER_MEMBRANE	3158	HMGCS2	3-hydroxy-3-methylglutaryl-CoA synthase 2 (mitochondrial)	1.69489	0.00079222
GO_ORGANELLE_INNER_MEMBRANE	134266	GRPEL2	GrpE-like 2, mitochondrial (E. coli)	1.52803	0.00612424
GO_ORGANELLE_INNER_MEMBRANE	1632	ECI1	enoyl-CoA delta isomerase 1	1.7211	0.00210442
GO_MICROBODY_LUMEN	54677	CROT	carnitine O-octanoyltransferase	1.87563	0.000840794
GO_MICROBODY_LUMEN	1384	CRAT	carnitine O-acetyltransferase	2.85378	0.00285356
GO_MICROBODY_LUMEN	26061	HACL1	2-hydroxyacyl-CoA lyase 1	2.10651	0.000775308
GO_MICROBODY_LUMEN	51	ACOX1	acyl-CoA oxidase 1, palmitoyl	1.66627	0.00242207
GO_MICROBODY_LUMEN	3295	HSD17B4	hydroxysteroid (17-beta) dehydrogenase 4	1.58035	0.000403005
GO_MICROBODY_LUMEN	283927	NUDT7	nudix (nucleoside diphosphate linked moiety X)-type motif 7	-2.17292	0.0458252
GO_MICROBODY_LUMEN	10455	ECI2	enoyl-CoA delta isomerase 2	1.74498	0.00178871
GO_MICROBODY_LUMEN	847	CAT	catalase	1.60446	0.00171348
GO_MICROBODY_LUMEN	5825	ABCD3	ATP-binding cassette, sub-family D (ALD), member 3	1.6066	0.00182228
GO_MICROBODY_LUMEN	122970	ACOT4	acyl-CoA thioesterase 4	3.38432	0.00368984
GO_MICROBODY_LUMEN	1962	EHHADH	enoyl-CoA, hydratase/3-hydroxyacyl CoA dehydrogenase	9.64907	0.000126974
GO_MITOCHONDRIAL_MATRIX	6821	SUOX	sulfite oxidase	1.57706	0.00517778
GO_MITOCHONDRIAL_MATRIX	1632	ECI1	enoyl-CoA delta isomerase 1	1.7211	0.00210442
GO_MITOCHONDRIAL_MATRIX	10965	ACOT2	acyl-CoA thioesterase 2	4.63269	0.0062207
GO_MITOCHONDRIAL_MATRIX	134266	GRPEL2	GrpE-like 2, mitochondrial (E. coli)	1.52803	0.00612424
GO_MITOCHONDRIAL_MATRIX	3158	HMGCS2	3-hydroxy-3-methylglutaryl-CoA synthase 2 (mitochondrial)	1.69489	0.00079222
GO_MITOCHONDRIAL_MATRIX	3033	HADH	hydroxyacyl-CoA dehydrogenase	1.52063	0.000393585
GO_MITOCHONDRIAL_MATRIX	2356	FPGS	folylpolyglutamate synthase	1.56811	0.000276656
GO_MITOCHONDRIAL_MATRIX	10845	CLPX	ClpX caseinolytic peptidase X homolog (E. coli)	3.21089	0.00030944
GO_MITOCHONDRIAL_MATRIX	34	ACADM	acyl-CoA dehydrogenase, C-4 to C-12 straight chain	1.99474	0.000454357
GO_MITOCHONDRIAL_MATRIX	3030	HADHA	hydroxyacyl-CoA dehydrogenase/3-ketoacyl-CoA thiolase/enoyl-CoA hydratase (trifunctional protein), alpha subunit	1.54394	0.000306471
GO_MITOCHONDRIAL_MATRIX	2731	GLDC	glycine dehydrogenase (decarboxylating)	2.24637	0.000863899
GO_MITOCHONDRIAL_MATRIX	33	ACADL	acyl-CoA dehydrogenase, long chain	1.72816	0.0028287
GO_MITOCHONDRIAL_MATRIX	1666	DECR1	2,4-dienoyl CoA reductase 1, mitochondrial	1.7845	0.000543546
GO_MITOCHONDRIAL_MATRIX	3032	HADHB	hydroxyacyl-CoA dehydrogenase/3-ketoacyl-CoA thiolase/enoyl-CoA hydratase (trifunctional protein), beta subunit	1.92885	0.000229025
GO_MITOCHONDRIAL_MATRIX	6296	ACSM3	acyl-CoA synthetase medium-chain family member 3	1.55279	0.0151525
GO_MITOCHONDRIAL_MATRIX	2110	ETFDH	electron-transferring-flavoprotein dehydrogenase	1.79156	0.00020707
GO_MITOCHONDRIAL_MATRIX	5166	PDK4	pyruvate dehydrogenase kinase, isozyme 4	4.66084	0.00209195
GO_MITOCHONDRIAL_MATRIX	9997	SCO2	SCO cytochrome oxidase deficient homolog 2 (yeast)	2.07655	0.0062045
GO_MITOCHONDRIAL_MATRIX	51166	AADAT	aminoadipate aminotransferase	1.53724	0.0176972
GO_MITOCHONDRIAL_MATRIX	38	ACAT1	acetyl-CoA acetyltransferase 1	1.77339	0.000855305
GO_MITOCHONDRIAL_MATRIX	4329	ALDH6A1	aldehyde dehydrogenase 6 family, member A1	1.55718	0.0130025
GO_EXTRACELLULAR_SPACE	6906	SERPINA7	serpin peptidase inhibitor, clade A (alpha-1 antiproteinase, antitrypsin), member 7	-4.06134	0.0103217
GO_EXTRACELLULAR_SPACE	6696	SPP1	secreted phosphoprotein 1	-2.58567	0.0263611
GO_EXTRACELLULAR_SPACE	3931	LCAT	lecithin-cholesterol acyltransferase	1.64584	0.0152627
GO_EXTRACELLULAR_SPACE	5657	PRTN3	proteinase 3	-1.71323	0.000352091
GO_EXTRACELLULAR_SPACE	3312	HSPA8	heat shock 70kDa protein 8	1.5283	0.00463497
GO_EXTRACELLULAR_SPACE	10417	SPON2	spondin 2, extracellular matrix protein	2.03525	0.0307004
GO_EXTRACELLULAR_SPACE	3818	KLKB1	kallikrein B, plasma (Fletcher factor) 1	1.57554	0.00211927
GO_EXTRACELLULAR_SPACE	5005	ORM2	orosomucoid 2	-7.17807	0.0200426
GO_EXTRACELLULAR_SPACE	2896	GRN	granulin	1.651	0.00866615
GO_EXTRACELLULAR_SPACE	3162	HMOX1	heme oxygenase (decycling) 1	1.56257	0.0232432
GO_EXTRACELLULAR_SPACE	9547	CXCL14	chemokine (C-X-C motif) ligand 14	-3.1521	0.000946541
GO_EXTRACELLULAR_SPACE	51129	ANGPTL4	angiopoietin-like 4	1.5661	0.00324162
GO_EXTRACELLULAR_SPACE	27329	ANGPTL3	angiopoietin-like 3	1.50328	0.00531285
GO_EXTRACELLULAR_SPACE	5270	SERPINE2	serpin peptidase inhibitor, clade E (nexin, plasminogen activator inhibitor type 1), member 2	1.62119	0.00408842
GO_EXTRACELLULAR_SPACE	2621	GAS6	growth arrest-specific 6	-2.46472	0.00347183
GO_EXTRACELLULAR_SPACE	8804	CREG1	cellular repressor of E1A-stimulated genes 1	1.60634	0.00313283
GO_EXTRACELLULAR_SPACE	948	CD36	CD36 molecule (thrombospondin receptor)	2.56785	0.00632914
GO_EXTRACELLULAR_SPACE	3240	HP	haptoglobin	-1.54848	0.0388761
GO_EXTRACELLULAR_SPACE	590	BCHE	butyrylcholinesterase	1.63658	0.000631726
GO_EXTRACELLULAR_SPACE	2157	F8	coagulation factor VIII, procoagulant component	1.54088	0.0141895
GO_EXTRACELLULAR_SPACE	847	CAT	catalase	1.60446	0.00171348
GO_EXTRACELLULAR_SPACE	2950	GSTP1	glutathione S-transferase pi 1	1.63912	0.0200483
GO_EXTRACELLULAR_SPACE	5444	PON1	paraoxonase 1	1.51404	0.00152714
GO_EXTRACELLULAR_SPACE	4969	OGN	osteoglycin	1.73328	0.024935
GO_EXTRACELLULAR_SPACE	325	APCS	amyloid P component, serum	-5.03148	0.0310081
GO_EXTRACELLULAR_SPACE	2531	KDSR	3-ketodihydrosphingosine reductase	1.50092	0.00438066
GO_EXTRACELLULAR_SPACE	3965	LGALS9	lectin, galactoside-binding, soluble, 9	1.69696	0.0290004
GO_EXTRACELLULAR_SPACE	79174	CRELD2	cysteine-rich with EGF-like domains 2	1.84066	0.0376209
GO_EXTRACELLULAR_SPACE	23643	LY96	lymphocyte antigen 96	2.49344	0.000684495
GO_EXTRACELLULAR_SPACE	283	ANG	angiogenin, ribonuclease, RNase A family, 5	-2.27736	0.0190897
GO_EXTRACELLULAR_SPACE	3485	IGFBP2	insulin-like growth factor binding protein 2, 36kDa	2.34147	0.012076
GO_EXTRACELLULAR_SPACE	57817	HAMP	hepcidin antimicrobial peptide	2.43666	0.0403913
GO_EXTRACELLULAR_SPACE	7412	VCAM1	vascular cell adhesion molecule 1	1.66558	0.00324484
GO_EXTRACELLULAR_SPACE	3626	INHBC	inhibin, beta C	1.51218	0.0131224
GO_LIPID_PARTICLE	63924	CIDEC	cell death-inducing DFFA-like effector c	2.70397	0.00162274
GO_LIPID_PARTICLE	50814	NSDHL	NAD(P) dependent steroid dehydrogenase-like	-2.14416	0.00831368
GO_LIPID_PARTICLE	440503	PLIN5	perilipin 5	2.38038	7.74295e-05
GO_LIPID_PARTICLE	123	PLIN2	perilipin 2	2.5629	0.00692206
GO_LIPID_PARTICLE	57104	PNPLA2	patatin-like phospholipase domain containing 2	1.81129	0.022903
GO_LIPID_PARTICLE	51170	HSD17B11	hydroxysteroid (17-beta) dehydrogenase 11	2.21898	0.00142
GO_LIPID_PARTICLE	729359	PLIN4	perilipin 4	2.17044	0.00853859
GO_LIPID_PARTICLE	345275	HSD17B13	hydroxysteroid (17-beta) dehydrogenase 13	2.11392	0.000255374
GO_MEMBRANE_PROTEIN_COMPLEX	4696	NDUFA3	NADH dehydrogenase (ubiquinone) 1 alpha subcomplex, 3, 9kDa	1.53457	0.0134308
GO_MEMBRANE_PROTEIN_COMPLEX	4627	MYH9	myosin, heavy chain 9, non-muscle	-1.50693	0.000996246
GO_MEMBRANE_PROTEIN_COMPLEX	6391	SDHC	succinate dehydrogenase complex, subunit C, integral membrane protein, 15kDa	1.62795	0.00613126
GO_MEMBRANE_PROTEIN_COMPLEX	972	CD74	CD74 molecule, major histocompatibility complex, class II invariant chain	2.00907	0.00446325
GO_MEMBRANE_PROTEIN_COMPLEX	3597	IL13RA1	interleukin 13 receptor, alpha 1	-2.22865	0.0308439
GO_MEMBRANE_PROTEIN_COMPLEX	9630	GNA14	guanine nucleotide binding protein (G protein), alpha 14	-1.56325	0.0334803
GO_MEMBRANE_PROTEIN_COMPLEX	128869	PIGU	phosphatidylinositol glycan anchor biosynthesis, class U	1.72966	0.00213706
GO_MEMBRANE_PROTEIN_COMPLEX	84447	SYVN1	synovial apoptosis inhibitor 1, synoviolin	1.65736	0.00317976
GO_MEMBRANE_PROTEIN_COMPLEX	51141	INSIG2	insulin induced gene 2	4.51312	0.000275459
GO_MEMBRANE_PROTEIN_COMPLEX	1603	DAD1	defender against cell death 1	1.9138	0.00850953
GO_MEMBRANE_PROTEIN_COMPLEX	6400	SEL1L	sel-1 suppressor of lin-12-like (C. elegans)	1.5051	0.00447047
GO_MEMBRANE_PROTEIN_COMPLEX	4715	NDUFB9	NADH dehydrogenase (ubiquinone) 1 beta subcomplex, 9, 22kDa	1.63818	0.0326675
GO_MEMBRANE_PROTEIN_COMPLEX	10483	SEC23B	Sec23 homolog B (S. cerevisiae)	1.62665	0.0425813
GO_MEMBRANE_PROTEIN_COMPLEX	488	ATP2A2	ATPase, Ca++ transporting, cardiac muscle, slow twitch 2	1.91167	0.00039089
GO_MEMBRANE_PROTEIN_COMPLEX	634	CEACAM1	carcinoembryonic antigen-related cell adhesion molecule 1 (biliary glycoprotein)	1.50125	0.00224974
GO_MEMBRANE_PROTEIN_COMPLEX	133688	UGT3A1	UDP glycosyltransferase 3 family, polypeptide A1	1.59242	0.000962368
GO_MEMBRANE_PROTEIN_COMPLEX	8301	PICALM	phosphatidylinositol binding clathrin assembly protein	1.5066	7.55271e-05
GO_MEMBRANE_PROTEIN_COMPLEX	2779	GNAT1	guanine nucleotide binding protein (G protein), alpha transducing activity polypeptide 1	-1.61589	0.0181812
GO_MEMBRANE_PROTEIN_COMPLEX	6331	SCN5A	sodium channel, voltage-gated, type V, alpha subunit	-1.53853	0.000335994
GO_MEMBRANE_PROTEIN_COMPLEX	841	CASP8	caspase 8, apoptosis-related cysteine peptidase	1.73114	0.0138296
GO_MEMBRANE_PROTEIN_COMPLEX	7412	VCAM1	vascular cell adhesion molecule 1	1.66558	0.00324484
GO_MEMBRANE_PROTEIN_COMPLEX	1135	CHRNA2	cholinergic receptor, nicotinic, alpha 2 (neuronal)	3.05296	0.0083854
GO_MEMBRANE_PROTEIN_COMPLEX	57406	ABHD6	abhydrolase domain containing 6	2.36925	0.00436045
GO_MEMBRANE_PROTEIN_COMPLEX	53354	PANK1	pantothenate kinase 1	1.50012	0.00261402
GO_MEMBRANE_PROTEIN_COMPLEX	201595	STT3B	STT3, subunit of the oligosaccharyltransferase complex, homolog B (S. cerevisiae)	1.72235	0.00723731
GO_MEMBRANE_PROTEIN_COMPLEX	23643	LY96	lymphocyte antigen 96	2.49344	0.000684495
GO_APICAL_PART_OF_CELL	5244	ABCB4	ATP-binding cassette, sub-family B (MDR/TAP), member 4	1.52019	0.0043556
GO_APICAL_PART_OF_CELL	114569	MAL2	mal, T-cell differentiation protein 2 (gene/pseudogene)	1.58391	0.0010883
GO_APICAL_PART_OF_CELL	9429	ABCG2	ATP-binding cassette, sub-family G (WHITE), member 2	1.80371	0.00152641
GO_APICAL_PART_OF_CELL	948	CD36	CD36 molecule (thrombospondin receptor)	2.56785	0.00632914
GO_APICAL_PART_OF_CELL	9076	CLDN1	claudin 1	1.73115	0.00595712
GO_APICAL_PART_OF_CELL	92840	REEP6	receptor accessory protein 6	1.63434	0.00501919
GO_APICAL_PART_OF_CELL	128338	DRAM2	DNA-damage regulated autophagy modulator 2	1.54723	0.000889882
GO_APICAL_PART_OF_CELL	7412	VCAM1	vascular cell adhesion molecule 1	1.66558	0.00324484
GO_APICAL_PART_OF_CELL	57817	HAMP	hepcidin antimicrobial peptide	2.43666	0.0403913
GO_APICAL_PART_OF_CELL	2779	GNAT1	guanine nucleotide binding protein (G protein), alpha transducing activity polypeptide 1	-1.61589	0.0181812
GO_APICAL_PART_OF_CELL	6584	SLC22A5	solute carrier family 22 (organic cation/carnitine transporter), member 5	2.19767	0.00263368
GO_APICAL_PART_OF_CELL	634	CEACAM1	carcinoembryonic antigen-related cell adhesion molecule 1 (biliary glycoprotein)	1.50125	0.00224974
GO_APICAL_PART_OF_CELL	10568	SLC34A2	solute carrier family 34 (sodium phosphate), member 2	1.79881	0.0178249
GO_APICAL_PART_OF_CELL	3485	IGFBP2	insulin-like growth factor binding protein 2, 36kDa	2.34147	0.012076
GO_APICAL_PART_OF_CELL	975	CD81	CD81 molecule	1.61804	0.0159953
GO_PLASMA_MEMBRANE_REGION	8671	SLC4A4	solute carrier family 4, sodium bicarbonate cotransporter, member 4	1.54624	0.00500488
GO_PLASMA_MEMBRANE_REGION	975	CD81	CD81 molecule	1.61804	0.0159953
GO_PLASMA_MEMBRANE_REGION	1135	CHRNA2	cholinergic receptor, nicotinic, alpha 2 (neuronal)	3.05296	0.0083854
GO_PLASMA_MEMBRANE_REGION	6331	SCN5A	sodium channel, voltage-gated, type V, alpha subunit	-1.53853	0.000335994
GO_PLASMA_MEMBRANE_REGION	6584	SLC22A5	solute carrier family 22 (organic cation/carnitine transporter), member 5	2.19767	0.00263368
GO_PLASMA_MEMBRANE_REGION	8301	PICALM	phosphatidylinositol binding clathrin assembly protein	1.5066	7.55271e-05
GO_PLASMA_MEMBRANE_REGION	2779	GNAT1	guanine nucleotide binding protein (G protein), alpha transducing activity polypeptide 1	-1.61589	0.0181812
GO_PLASMA_MEMBRANE_REGION	8825	LIN7A	lin-7 homolog A (C. elegans)	-1.77877	0.000909517
GO_PLASMA_MEMBRANE_REGION	10400	PEMT	phosphatidylethanolamine N-methyltransferase	1.51585	0.0193472
GO_PLASMA_MEMBRANE_REGION	3485	IGFBP2	insulin-like growth factor binding protein 2, 36kDa	2.34147	0.012076
GO_PLASMA_MEMBRANE_REGION	10568	SLC34A2	solute carrier family 34 (sodium phosphate), member 2	1.79881	0.0178249
GO_PLASMA_MEMBRANE_REGION	634	CEACAM1	carcinoembryonic antigen-related cell adhesion molecule 1 (biliary glycoprotein)	1.50125	0.00224974
GO_PLASMA_MEMBRANE_REGION	8436	SDPR	serum deprivation response	1.65428	0.028344
GO_PLASMA_MEMBRANE_REGION	3162	HMOX1	heme oxygenase (decycling) 1	1.56257	0.0232432
GO_PLASMA_MEMBRANE_REGION	3953	LEPR	leptin receptor	1.63649	0.00281941
GO_PLASMA_MEMBRANE_REGION	30845	EHD3	EH-domain containing 3	1.69905	0.00697414
GO_PLASMA_MEMBRANE_REGION	128338	DRAM2	DNA-damage regulated autophagy modulator 2	1.54723	0.000889882
GO_PLASMA_MEMBRANE_REGION	55450	CAMK2N1	calcium/calmodulin-dependent protein kinase II inhibitor 1	-1.54105	0.00202792
GO_PLASMA_MEMBRANE_REGION	9429	ABCG2	ATP-binding cassette, sub-family G (WHITE), member 2	1.80371	0.00152641
GO_PLASMA_MEMBRANE_REGION	5244	ABCB4	ATP-binding cassette, sub-family B (MDR/TAP), member 4	1.52019	0.0043556
GO_PLASMA_MEMBRANE_REGION	114569	MAL2	mal, T-cell differentiation protein 2 (gene/pseudogene)	1.58391	0.0010883
GO_PLASMA_MEMBRANE_REGION	948	CD36	CD36 molecule (thrombospondin receptor)	2.56785	0.00632914
GO_PLASMA_MEMBRANE_REGION	9076	CLDN1	claudin 1	1.73115	0.00595712
GO_APICAL_PLASMA_MEMBRANE	975	CD81	CD81 molecule	1.61804	0.0159953
GO_APICAL_PLASMA_MEMBRANE	634	CEACAM1	carcinoembryonic antigen-related cell adhesion molecule 1 (biliary glycoprotein)	1.50125	0.00224974
GO_APICAL_PLASMA_MEMBRANE	3485	IGFBP2	insulin-like growth factor binding protein 2, 36kDa	2.34147	0.012076
GO_APICAL_PLASMA_MEMBRANE	10568	SLC34A2	solute carrier family 34 (sodium phosphate), member 2	1.79881	0.0178249
GO_APICAL_PLASMA_MEMBRANE	2779	GNAT1	guanine nucleotide binding protein (G protein), alpha transducing activity polypeptide 1	-1.61589	0.0181812
GO_APICAL_PLASMA_MEMBRANE	6584	SLC22A5	solute carrier family 22 (organic cation/carnitine transporter), member 5	2.19767	0.00263368
GO_APICAL_PLASMA_MEMBRANE	128338	DRAM2	DNA-damage regulated autophagy modulator 2	1.54723	0.000889882
GO_APICAL_PLASMA_MEMBRANE	9076	CLDN1	claudin 1	1.73115	0.00595712
GO_APICAL_PLASMA_MEMBRANE	114569	MAL2	mal, T-cell differentiation protein 2 (gene/pseudogene)	1.58391	0.0010883
GO_APICAL_PLASMA_MEMBRANE	5244	ABCB4	ATP-binding cassette, sub-family B (MDR/TAP), member 4	1.52019	0.0043556
GO_APICAL_PLASMA_MEMBRANE	9429	ABCG2	ATP-binding cassette, sub-family G (WHITE), member 2	1.80371	0.00152641
GO_APICAL_PLASMA_MEMBRANE	948	CD36	CD36 molecule (thrombospondin receptor)	2.56785	0.00632914
GO_MEMBRANE_REGION	1135	CHRNA2	cholinergic receptor, nicotinic, alpha 2 (neuronal)	3.05296	0.0083854
GO_MEMBRANE_REGION	8671	SLC4A4	solute carrier family 4, sodium bicarbonate cotransporter, member 4	1.54624	0.00500488
GO_MEMBRANE_REGION	975	CD81	CD81 molecule	1.61804	0.0159953
GO_MEMBRANE_REGION	8825	LIN7A	lin-7 homolog A (C. elegans)	-1.77877	0.000909517
GO_MEMBRANE_REGION	10400	PEMT	phosphatidylethanolamine N-methyltransferase	1.51585	0.0193472
GO_MEMBRANE_REGION	3485	IGFBP2	insulin-like growth factor binding protein 2, 36kDa	2.34147	0.012076
GO_MEMBRANE_REGION	10568	SLC34A2	solute carrier family 34 (sodium phosphate), member 2	1.79881	0.0178249
GO_MEMBRANE_REGION	634	CEACAM1	carcinoembryonic antigen-related cell adhesion molecule 1 (biliary glycoprotein)	1.50125	0.00224974
GO_MEMBRANE_REGION	6331	SCN5A	sodium channel, voltage-gated, type V, alpha subunit	-1.53853	0.000335994
GO_MEMBRANE_REGION	841	CASP8	caspase 8, apoptosis-related cysteine peptidase	1.73114	0.0138296
GO_MEMBRANE_REGION	6584	SLC22A5	solute carrier family 22 (organic cation/carnitine transporter), member 5	2.19767	0.00263368
GO_MEMBRANE_REGION	8301	PICALM	phosphatidylinositol binding clathrin assembly protein	1.5066	7.55271e-05
GO_MEMBRANE_REGION	2779	GNAT1	guanine nucleotide binding protein (G protein), alpha transducing activity polypeptide 1	-1.61589	0.0181812
GO_MEMBRANE_REGION	30845	EHD3	EH-domain containing 3	1.69905	0.00697414
GO_MEMBRANE_REGION	128338	DRAM2	DNA-damage regulated autophagy modulator 2	1.54723	0.000889882
GO_MEMBRANE_REGION	8436	SDPR	serum deprivation response	1.65428	0.028344
GO_MEMBRANE_REGION	3162	HMOX1	heme oxygenase (decycling) 1	1.56257	0.0232432
GO_MEMBRANE_REGION	3953	LEPR	leptin receptor	1.63649	0.00281941
GO_MEMBRANE_REGION	9076	CLDN1	claudin 1	1.73115	0.00595712
GO_MEMBRANE_REGION	55450	CAMK2N1	calcium/calmodulin-dependent protein kinase II inhibitor 1	-1.54105	0.00202792
GO_MEMBRANE_REGION	9429	ABCG2	ATP-binding cassette, sub-family G (WHITE), member 2	1.80371	0.00152641
GO_MEMBRANE_REGION	5244	ABCB4	ATP-binding cassette, sub-family B (MDR/TAP), member 4	1.52019	0.0043556
GO_MEMBRANE_REGION	114569	MAL2	mal, T-cell differentiation protein 2 (gene/pseudogene)	1.58391	0.0010883
GO_MEMBRANE_REGION	948	CD36	CD36 molecule (thrombospondin receptor)	2.56785	0.00632914
GO_INTRACELLULAR_VESICLE	9367	RAB9A	RAB9A, member RAS oncogene family	1.56683	0.0121649
GO_INTRACELLULAR_VESICLE	10808	HSPH1	heat shock 105kDa/110kDa protein 1	1.90561	0.000897429
GO_INTRACELLULAR_VESICLE	10618	TGOLN2	trans-golgi network protein 2	1.73509	0.00155531
GO_INTRACELLULAR_VESICLE	55681	SCYL2	SCY1-like 2 (S. cerevisiae)	1.51395	0.000335582
GO_INTRACELLULAR_VESICLE	10483	SEC23B	Sec23 homolog B (S. cerevisiae)	1.62665	0.0425813
GO_INTRACELLULAR_VESICLE	283	ANG	angiogenin, ribonuclease, RNase A family, 5	-2.27736	0.0190897
GO_INTRACELLULAR_VESICLE	3485	IGFBP2	insulin-like growth factor binding protein 2, 36kDa	2.34147	0.012076
GO_INTRACELLULAR_VESICLE	246213	SLC17A8	solute carrier family 17 (sodium-dependent inorganic phosphate cotransporter), member 8	3.8658	0.00138831
GO_INTRACELLULAR_VESICLE	8301	PICALM	phosphatidylinositol binding clathrin assembly protein	1.5066	7.55271e-05
GO_INTRACELLULAR_VESICLE	4311	MME	membrane metallo-endopeptidase	3.49531	0.000484026
GO_INTRACELLULAR_VESICLE	30845	EHD3	EH-domain containing 3	1.69905	0.00697414
GO_INTRACELLULAR_VESICLE	134429	STARD4	StAR-related lipid transfer (START) domain containing 4	-1.61857	0.00170231
GO_INTRACELLULAR_VESICLE	3312	HSPA8	heat shock 70kDa protein 8	1.5283	0.00463497
GO_INTRACELLULAR_VESICLE	5005	ORM2	orosomucoid 2	-7.17807	0.0200426
GO_INTRACELLULAR_VESICLE	1200	TPP1	tripeptidyl peptidase I	1.72256	0.0208322
GO_INTRACELLULAR_VESICLE	2621	GAS6	growth arrest-specific 6	-2.46472	0.00347183
GO_INTRACELLULAR_VESICLE	5270	SERPINE2	serpin peptidase inhibitor, clade E (nexin, plasminogen activator inhibitor type 1), member 2	1.62119	0.00408842
GO_INTRACELLULAR_VESICLE	51128	SAR1B	SAR1 homolog B (S. cerevisiae)	1.62151	0.0006586
GO_INTRACELLULAR_VESICLE	948	CD36	CD36 molecule (thrombospondin receptor)	2.56785	0.00632914
GO_INTRACELLULAR_VESICLE	2157	F8	coagulation factor VIII, procoagulant component	1.54088	0.0141895
GO_INTRACELLULAR_VESICLE	972	CD74	CD74 molecule, major histocompatibility complex, class II invariant chain	2.00907	0.00446325
GO_INTRACELLULAR_VESICLE	5244	ABCB4	ATP-binding cassette, sub-family B (MDR/TAP), member 4	1.52019	0.0043556
GO_INTRACELLULAR_VESICLE	3240	HP	haptoglobin	-1.54848	0.0388761
GO_INTRACELLULAR_VESICLE	3309	HSPA5	heat shock 70kDa protein 5 (glucose-regulated protein, 78kDa)	1.50922	0.0237466
GO_INTRACELLULAR_VESICLE	58476	TP53INP2	tumor protein p53 inducible nuclear protein 2	1.72446	0.00352989
GO_GOLGI_APPARATUS	27329	ANGPTL3	angiopoietin-like 3	1.50328	0.00531285
GO_GOLGI_APPARATUS	2621	GAS6	growth arrest-specific 6	-2.46472	0.00347183
GO_GOLGI_APPARATUS	51128	SAR1B	SAR1 homolog B (S. cerevisiae)	1.62151	0.0006586
GO_GOLGI_APPARATUS	948	CD36	CD36 molecule (thrombospondin receptor)	2.56785	0.00632914
GO_GOLGI_APPARATUS	2157	F8	coagulation factor VIII, procoagulant component	1.54088	0.0141895
GO_GOLGI_APPARATUS	10955	SERINC3	serine incorporator 3	1.76767	0.0036202
GO_GOLGI_APPARATUS	847	CAT	catalase	1.60446	0.00171348
GO_GOLGI_APPARATUS	972	CD74	CD74 molecule, major histocompatibility complex, class II invariant chain	2.00907	0.00446325
GO_GOLGI_APPARATUS	128338	DRAM2	DNA-damage regulated autophagy modulator 2	1.54723	0.000889882
GO_GOLGI_APPARATUS	27314	RAB30	RAB30, member RAS oncogene family	1.85987	0.000370926
GO_GOLGI_APPARATUS	8549	LGR5	leucine-rich repeat containing G protein-coupled receptor 5	-1.54856	2.26574e-05
GO_GOLGI_APPARATUS	9547	CXCL14	chemokine (C-X-C motif) ligand 14	-3.1521	0.000946541
GO_GOLGI_APPARATUS	10483	SEC23B	Sec23 homolog B (S. cerevisiae)	1.62665	0.0425813
GO_GOLGI_APPARATUS	2590	GALNT2	UDP-N-acetyl-alpha-D-galactosamine:polypeptide N-acetylgalactosaminyltransferase 2 (GalNAc-T2)	1.58888	0.00242936
GO_GOLGI_APPARATUS	8553	BHLHE40	basic helix-loop-helix family, member e40	-1.53218	0.0447345
GO_GOLGI_APPARATUS	8301	PICALM	phosphatidylinositol binding clathrin assembly protein	1.5066	7.55271e-05
GO_GOLGI_APPARATUS	1718	DHCR24	24-dehydrocholesterol reductase	-1.58136	0.0182725
GO_GOLGI_APPARATUS	50999	TMED5	transmembrane emp24 protein transport domain containing 5	1.55305	0.0019467
GO_GOLGI_APPARATUS	7412	VCAM1	vascular cell adhesion molecule 1	1.66558	0.00324484
GO_GOLGI_APPARATUS	23259	DDHD2	DDHD domain containing 2	1.6491	0.0163086
GO_GOLGI_APPARATUS	4969	OGN	osteoglycin	1.73328	0.024935
GO_GOLGI_APPARATUS	10618	TGOLN2	trans-golgi network protein 2	1.73509	0.00155531
GO_GOLGI_APPARATUS	9367	RAB9A	RAB9A, member RAS oncogene family	1.56683	0.0121649
GO_GOLGI_APPARATUS	201232	SLC16A13	solute carrier family 16, member 13 (monocarboxylic acid transporter 13)	1.5352	0.0127123
GO_GOLGI_APPARATUS	55681	SCYL2	SCY1-like 2 (S. cerevisiae)	1.51395	0.000335582
GO_GOLGI_APPARATUS	79174	CRELD2	cysteine-rich with EGF-like domains 2	1.84066	0.0376209
GO_GOLGI_APPARATUS	8869	ST3GAL5	ST3 beta-galactoside alpha-2,3-sialyltransferase 5	2.04168	0.000344308
GO_INTRINSIC_COMPONENT_OF_ORGANELLE_MEMBRANE	8800	PEX11A	peroxisomal biogenesis factor 11 alpha	3.57288	0.000654153
GO_INTRINSIC_COMPONENT_OF_ORGANELLE_MEMBRANE	2110	ETFDH	electron-transferring-flavoprotein dehydrogenase	1.79156	0.00020707
GO_INTRINSIC_COMPONENT_OF_ORGANELLE_MEMBRANE	972	CD74	CD74 molecule, major histocompatibility complex, class II invariant chain	2.00907	0.00446325
GO_INTRINSIC_COMPONENT_OF_ORGANELLE_MEMBRANE	3309	HSPA5	heat shock 70kDa protein 5 (glucose-regulated protein, 78kDa)	1.50922	0.0237466
GO_INTRINSIC_COMPONENT_OF_ORGANELLE_MEMBRANE	128869	PIGU	phosphatidylinositol glycan anchor biosynthesis, class U	1.72966	0.00213706
GO_INTRINSIC_COMPONENT_OF_ORGANELLE_MEMBRANE	84447	SYVN1	synovial apoptosis inhibitor 1, synoviolin	1.65736	0.00317976
GO_INTRINSIC_COMPONENT_OF_ORGANELLE_MEMBRANE	51141	INSIG2	insulin induced gene 2	4.51312	0.000275459
GO_INTRINSIC_COMPONENT_OF_ORGANELLE_MEMBRANE	2590	GALNT2	UDP-N-acetyl-alpha-D-galactosamine:polypeptide N-acetylgalactosaminyltransferase 2 (GalNAc-T2)	1.58888	0.00242936
GO_INTRINSIC_COMPONENT_OF_ORGANELLE_MEMBRANE	161247	FITM1	fat storage-inducing transmembrane protein 1	1.84418	0.00727275
GO_INTRINSIC_COMPONENT_OF_ORGANELLE_MEMBRANE	128486	FITM2	fat storage-inducing transmembrane protein 2	1.79922	0.00138607
GO_INTRINSIC_COMPONENT_OF_ORGANELLE_MEMBRANE	8869	ST3GAL5	ST3 beta-galactoside alpha-2,3-sialyltransferase 5	2.04168	0.000344308
GO_CATALYTIC_COMPLEX	2731	GLDC	glycine dehydrogenase (decarboxylating)	2.24637	0.000863899
GO_CATALYTIC_COMPLEX	4696	NDUFA3	NADH dehydrogenase (ubiquinone) 1 alpha subcomplex, 3, 9kDa	1.53457	0.0134308
GO_CATALYTIC_COMPLEX	127707	KLHDC7A	kelch domain containing 7A	-1.5507	1.98531e-06
GO_CATALYTIC_COMPLEX	2958	GTF2A2	general transcription factor IIA, 2, 12kDa	-1.64628	0.0465577
GO_CATALYTIC_COMPLEX	6391	SDHC	succinate dehydrogenase complex, subunit C, integral membrane protein, 15kDa	1.62795	0.00613126
GO_CATALYTIC_COMPLEX	128869	PIGU	phosphatidylinositol glycan anchor biosynthesis, class U	1.72966	0.00213706
GO_CATALYTIC_COMPLEX	9630	GNA14	guanine nucleotide binding protein (G protein), alpha 14	-1.56325	0.0334803
GO_CATALYTIC_COMPLEX	54461	FBXW5	F-box and WD repeat domain containing 5	1.52258	0.0344069
GO_CATALYTIC_COMPLEX	84447	SYVN1	synovial apoptosis inhibitor 1, synoviolin	1.65736	0.00317976
GO_CATALYTIC_COMPLEX	1026	CDKN1A	cyclin-dependent kinase inhibitor 1A (p21, Cip1)	13.8375	1.05919e-05
GO_CATALYTIC_COMPLEX	3312	HSPA8	heat shock 70kDa protein 8	1.5283	0.00463497
GO_CATALYTIC_COMPLEX	2820	GPD2	glycerol-3-phosphate dehydrogenase 2 (mitochondrial)	1.58725	0.0356215
GO_CATALYTIC_COMPLEX	6400	SEL1L	sel-1 suppressor of lin-12-like (C. elegans)	1.5051	0.00447047
GO_CATALYTIC_COMPLEX	1603	DAD1	defender against cell death 1	1.9138	0.00850953
GO_CATALYTIC_COMPLEX	9776	ATG13	ATG13 autophagy related 13 homolog (S. cerevisiae)	1.51192	0.0269545
GO_CATALYTIC_COMPLEX	4715	NDUFB9	NADH dehydrogenase (ubiquinone) 1 beta subcomplex, 9, 22kDa	1.63818	0.0326675
GO_CATALYTIC_COMPLEX	79872	CBLL1	Cas-Br-M (murine) ecotropic retroviral transforming sequence-like 1	1.64438	0.00995289
GO_CATALYTIC_COMPLEX	488	ATP2A2	ATPase, Ca++ transporting, cardiac muscle, slow twitch 2	1.91167	0.00039089
GO_CATALYTIC_COMPLEX	2779	GNAT1	guanine nucleotide binding protein (G protein), alpha transducing activity polypeptide 1	-1.61589	0.0181812
GO_CATALYTIC_COMPLEX	841	CASP8	caspase 8, apoptosis-related cysteine peptidase	1.73114	0.0138296
GO_CATALYTIC_COMPLEX	2729	GCLC	glutamate-cysteine ligase, catalytic subunit	1.91732	0.0112782
GO_CATALYTIC_COMPLEX	201595	STT3B	STT3, subunit of the oligosaccharyltransferase complex, homolog B (S. cerevisiae)	1.72235	0.00723731
GO_OUTER_MEMBRANE	54884	RETSAT	retinol saturase (all-trans-retinol 13,14-reductase)	4.89906	9.08576e-05
GO_OUTER_MEMBRANE	3032	HADHB	hydroxyacyl-CoA dehydrogenase/3-ketoacyl-CoA thiolase/enoyl-CoA hydratase (trifunctional protein), beta subunit	1.92885	0.000229025
GO_OUTER_MEMBRANE	1375	CPT1B	carnitine palmitoyltransferase 1B (muscle)	1.50418	0.0301416
GO_OUTER_MEMBRANE	4129	MAOB	monoamine oxidase B	1.63753	0.00256494
GO_OUTER_MEMBRANE	2710	GK	glycerol kinase	1.6816	0.0019605
GO_OUTER_MEMBRANE	23788	MTCH2	mitochondrial carrier 2	1.52655	0.0120035
GO_OUTER_MEMBRANE	51703	ACSL5	acyl-CoA synthetase long-chain family member 5	1.6176	0.000648662
GO_OUTER_MEMBRANE	2180	ACSL1	acyl-CoA synthetase long-chain family member 1	3.24665	0.00047773
GO_OUTER_MEMBRANE	841	CASP8	caspase 8, apoptosis-related cysteine peptidase	1.73114	0.0138296
GO_INTRINSIC_COMPONENT_OF_PLASMA_MEMBRANE	5787	PTPRB	protein tyrosine phosphatase, receptor type, B	1.50214	0.00367442
GO_INTRINSIC_COMPONENT_OF_PLASMA_MEMBRANE	10894	LYVE1	lymphatic vessel endothelial hyaluronan receptor 1	1.67944	0.00115597
GO_INTRINSIC_COMPONENT_OF_PLASMA_MEMBRANE	284111	SLC13A5	solute carrier family 13 (sodium-dependent citrate transporter), member 5	-4.03895	0.0187846
GO_INTRINSIC_COMPONENT_OF_PLASMA_MEMBRANE	8549	LGR5	leucine-rich repeat containing G protein-coupled receptor 5	-1.54856	2.26574e-05
GO_INTRINSIC_COMPONENT_OF_PLASMA_MEMBRANE	4311	MME	membrane metallo-endopeptidase	3.49531	0.000484026
GO_INTRINSIC_COMPONENT_OF_PLASMA_MEMBRANE	64849	SLC13A3	solute carrier family 13 (sodium-dependent dicarboxylate transporter), member 3	-2.01077	0.0410159
GO_INTRINSIC_COMPONENT_OF_PLASMA_MEMBRANE	3597	IL13RA1	interleukin 13 receptor, alpha 1	-2.22865	0.0308439
GO_INTRINSIC_COMPONENT_OF_PLASMA_MEMBRANE	5244	ABCB4	ATP-binding cassette, sub-family B (MDR/TAP), member 4	1.52019	0.0043556
GO_INTRINSIC_COMPONENT_OF_PLASMA_MEMBRANE	441168	FAM26F	family with sequence similarity 26, member F	-1.57913	0.0210457
GO_INTRINSIC_COMPONENT_OF_PLASMA_MEMBRANE	948	CD36	CD36 molecule (thrombospondin receptor)	2.56785	0.00632914
GO_INTRINSIC_COMPONENT_OF_PLASMA_MEMBRANE	4627	MYH9	myosin, heavy chain 9, non-muscle	-1.50693	0.000996246
GO_INTRINSIC_COMPONENT_OF_PLASMA_MEMBRANE	9194	SLC16A7	solute carrier family 16, member 7 (monocarboxylic acid transporter 2)	2.01742	0.00544407
GO_INTRINSIC_COMPONENT_OF_PLASMA_MEMBRANE	9076	CLDN1	claudin 1	1.73115	0.00595712
GO_INTRINSIC_COMPONENT_OF_PLASMA_MEMBRANE	6566	SLC16A1	solute carrier family 16, member 1 (monocarboxylic acid transporter 1)	2.16833	0.0025293
GO_INTRINSIC_COMPONENT_OF_PLASMA_MEMBRANE	8869	ST3GAL5	ST3 beta-galactoside alpha-2,3-sialyltransferase 5	2.04168	0.000344308
GO_INTRINSIC_COMPONENT_OF_PLASMA_MEMBRANE	23643	LY96	lymphocyte antigen 96	2.49344	0.000684495
GO_INTRINSIC_COMPONENT_OF_PLASMA_MEMBRANE	975	CD81	CD81 molecule	1.61804	0.0159953
GO_INTRINSIC_COMPONENT_OF_PLASMA_MEMBRANE	201232	SLC16A13	solute carrier family 16, member 13 (monocarboxylic acid transporter 13)	1.5352	0.0127123
GO_INTRINSIC_COMPONENT_OF_PLASMA_MEMBRANE	8671	SLC4A4	solute carrier family 4, sodium bicarbonate cotransporter, member 4	1.54624	0.00500488
GO_INTRINSIC_COMPONENT_OF_PLASMA_MEMBRANE	57406	ABHD6	abhydrolase domain containing 6	2.36925	0.00436045
GO_INTRINSIC_COMPONENT_OF_PLASMA_MEMBRANE	1135	CHRNA2	cholinergic receptor, nicotinic, alpha 2 (neuronal)	3.05296	0.0083854
GO_INTRINSIC_COMPONENT_OF_PLASMA_MEMBRANE	6331	SCN5A	sodium channel, voltage-gated, type V, alpha subunit	-1.53853	0.000335994
GO_INTRINSIC_COMPONENT_OF_PLASMA_MEMBRANE	9121	SLC16A5	solute carrier family 16, member 5 (monocarboxylic acid transporter 6)	1.6354	0.00113775
GO_INTRINSIC_COMPONENT_OF_PLASMA_MEMBRANE	6584	SLC22A5	solute carrier family 22 (organic cation/carnitine transporter), member 5	2.19767	0.00263368
GO_INTRINSIC_COMPONENT_OF_PLASMA_MEMBRANE	8714	ABCC3	ATP-binding cassette, sub-family C (CFTR/MRP), member 3	2.14302	0.00354122
GO_INTRINSIC_COMPONENT_OF_PLASMA_MEMBRANE	634	CEACAM1	carcinoembryonic antigen-related cell adhesion molecule 1 (biliary glycoprotein)	1.50125	0.00224974
GO_INTRINSIC_COMPONENT_OF_PLASMA_MEMBRANE	10568	SLC34A2	solute carrier family 34 (sodium phosphate), member 2	1.79881	0.0178249
GO_INTRINSIC_COMPONENT_OF_PLASMA_MEMBRANE	488	ATP2A2	ATPase, Ca++ transporting, cardiac muscle, slow twitch 2	1.91167	0.00039089
GO_CELL_PROJECTION	23329	TBC1D30	TBC1 domain family, member 30	-1.55882	0.0408426
GO_CELL_PROJECTION	92840	REEP6	receptor accessory protein 6	1.63434	0.00501919
GO_CELL_PROJECTION	4524	MTHFR	methylenetetrahydrofolate reductase (NAD(P)H)	1.66844	0.0183477
GO_CELL_PROJECTION	4311	MME	membrane metallo-endopeptidase	3.49531	0.000484026
GO_CELL_PROJECTION	30845	EHD3	EH-domain containing 3	1.69905	0.00697414
GO_CELL_PROJECTION	6696	SPP1	secreted phosphoprotein 1	-2.58567	0.0263611
GO_CELL_PROJECTION	55450	CAMK2N1	calcium/calmodulin-dependent protein kinase II inhibitor 1	-1.54105	0.00202792
GO_CELL_PROJECTION	4627	MYH9	myosin, heavy chain 9, non-muscle	-1.50693	0.000996246
GO_CELL_PROJECTION	80315	CPEB4	cytoplasmic polyadenylation element binding protein 4	1.71331	0.0137244
GO_CELL_PROJECTION	948	CD36	CD36 molecule (thrombospondin receptor)	2.56785	0.00632914
GO_CELL_PROJECTION	9572	NR1D1	nuclear receptor subfamily 1, group D, member 1	-2.71243	0.00139493
GO_CELL_PROJECTION	27329	ANGPTL3	angiopoietin-like 3	1.50328	0.00531285
GO_CELL_PROJECTION	60481	ELOVL5	ELOVL fatty acid elongase 5	2.31279	0.00910325
GO_CELL_PROJECTION	84173	ELMOD3	ELMO/CED-12 domain containing 3	1.99825	0.00108334
GO_CELL_PROJECTION	9446	GSTO1	glutathione S-transferase omega 1	1.52302	0.00912031
GO_CELL_PROJECTION	34	ACADM	acyl-CoA dehydrogenase, C-4 to C-12 straight chain	1.99474	0.000454357
GO_CELL_PROJECTION	9531	BAG3	BCL2-associated athanogene 3	2.06947	0.00170749
GO_CELL_PROJECTION	841	CASP8	caspase 8, apoptosis-related cysteine peptidase	1.73114	0.0138296
GO_CELL_PROJECTION	7412	VCAM1	vascular cell adhesion molecule 1	1.66558	0.00324484
GO_CELL_PROJECTION	6584	SLC22A5	solute carrier family 22 (organic cation/carnitine transporter), member 5	2.19767	0.00263368
GO_CELL_PROJECTION	2779	GNAT1	guanine nucleotide binding protein (G protein), alpha transducing activity polypeptide 1	-1.61589	0.0181812
GO_CELL_PROJECTION	23242	COBL	cordon-bleu homolog (mouse)	-2.03794	0.00242098
GO_CELL_PROJECTION	22885	ABLIM3	actin binding LIM protein family, member 3	1.78484	0.000402864
GO_CELL_PROJECTION	8825	LIN7A	lin-7 homolog A (C. elegans)	-1.77877	0.000909517
GO_CELL_PROJECTION	10400	PEMT	phosphatidylethanolamine N-methyltransferase	1.51585	0.0193472
GO_CELL_PROJECTION	10568	SLC34A2	solute carrier family 34 (sodium phosphate), member 2	1.79881	0.0178249
GO_CELL_PROJECTION	283	ANG	angiogenin, ribonuclease, RNase A family, 5	-2.27736	0.0190897
GO_CELL_PROJECTION	26256	CABYR	calcium binding tyrosine-(Y)-phosphorylation regulated	-5.21186	0.00557591
GO_CELL_PROJECTION	246213	SLC17A8	solute carrier family 17 (sodium-dependent inorganic phosphate cotransporter), member 8	3.8658	0.00138831
GO_COATED_VESICLE	51128	SAR1B	SAR1 homolog B (S. cerevisiae)	1.62151	0.0006586
GO_COATED_VESICLE	5244	ABCB4	ATP-binding cassette, sub-family B (MDR/TAP), member 4	1.52019	0.0043556
GO_COATED_VESICLE	2157	F8	coagulation factor VIII, procoagulant component	1.54088	0.0141895
GO_COATED_VESICLE	972	CD74	CD74 molecule, major histocompatibility complex, class II invariant chain	2.00907	0.00446325
GO_COATED_VESICLE	3312	HSPA8	heat shock 70kDa protein 8	1.5283	0.00463497
GO_COATED_VESICLE	10483	SEC23B	Sec23 homolog B (S. cerevisiae)	1.62665	0.0425813
GO_COATED_VESICLE	8301	PICALM	phosphatidylinositol binding clathrin assembly protein	1.5066	7.55271e-05
GO_COATED_VESICLE	10618	TGOLN2	trans-golgi network protein 2	1.73509	0.00155531
GO_COATED_VESICLE	55681	SCYL2	SCY1-like 2 (S. cerevisiae)	1.51395	0.000335582
GO_INTRINSIC_COMPONENT_OF_ENDOPLASMIC_RETICULUM_MEMBRANE	84447	SYVN1	synovial apoptosis inhibitor 1, synoviolin	1.65736	0.00317976
GO_INTRINSIC_COMPONENT_OF_ENDOPLASMIC_RETICULUM_MEMBRANE	51141	INSIG2	insulin induced gene 2	4.51312	0.000275459
GO_INTRINSIC_COMPONENT_OF_ENDOPLASMIC_RETICULUM_MEMBRANE	972	CD74	CD74 molecule, major histocompatibility complex, class II invariant chain	2.00907	0.00446325
GO_INTRINSIC_COMPONENT_OF_ENDOPLASMIC_RETICULUM_MEMBRANE	128869	PIGU	phosphatidylinositol glycan anchor biosynthesis, class U	1.72966	0.00213706
GO_INTRINSIC_COMPONENT_OF_ENDOPLASMIC_RETICULUM_MEMBRANE	3309	HSPA5	heat shock 70kDa protein 5 (glucose-regulated protein, 78kDa)	1.50922	0.0237466
GO_INTRINSIC_COMPONENT_OF_ENDOPLASMIC_RETICULUM_MEMBRANE	161247	FITM1	fat storage-inducing transmembrane protein 1	1.84418	0.00727275
GO_INTRINSIC_COMPONENT_OF_ENDOPLASMIC_RETICULUM_MEMBRANE	128486	FITM2	fat storage-inducing transmembrane protein 2	1.79922	0.00138607
GO_CLUSTER_OF_ACTIN_BASED_CELL_PROJECTIONS	4311	MME	membrane metallo-endopeptidase	3.49531	0.000484026
GO_CLUSTER_OF_ACTIN_BASED_CELL_PROJECTIONS	4627	MYH9	myosin, heavy chain 9, non-muscle	-1.50693	0.000996246
GO_CLUSTER_OF_ACTIN_BASED_CELL_PROJECTIONS	948	CD36	CD36 molecule (thrombospondin receptor)	2.56785	0.00632914
GO_CLUSTER_OF_ACTIN_BASED_CELL_PROJECTIONS	84173	ELMOD3	ELMO/CED-12 domain containing 3	1.99825	0.00108334
GO_CLUSTER_OF_ACTIN_BASED_CELL_PROJECTIONS	10568	SLC34A2	solute carrier family 34 (sodium phosphate), member 2	1.79881	0.0178249
GO_CLUSTER_OF_ACTIN_BASED_CELL_PROJECTIONS	10400	PEMT	phosphatidylethanolamine N-methyltransferase	1.51585	0.0193472
GO_CLUSTER_OF_ACTIN_BASED_CELL_PROJECTIONS	6584	SLC22A5	solute carrier family 22 (organic cation/carnitine transporter), member 5	2.19767	0.00263368

## Sheet: GO-MF
Gene Set Name	Description	Genes in Gene Set	Genes in Overlap	P-value	FDR	Count of AntibodyList
GO_OXIDOREDUCTASE_ACTIVITY	Catalysis of an oxidation-reduction (redox) reaction, a reversible chemical reaction in which the oxidation state of an atom or atoms within a molecule is altered. One substrate acts as a hydrogen or electron donor and becomes oxidized, while the other acts as hydrogen or electron acceptor and becomes reduced.	719	54	2.98e-38	2.68e-35	0
GO_COFACTOR_BINDING	Interacting selectively and non-covalently with a cofactor, a substance that is required for the activity of an enzyme or other protein. Cofactors may be inorganic, such as the metal atoms zinc, iron, and copper in certain forms, or organic, in which case they are referred to as coenzymes. Cofactors may either be bound tightly to active sites or bind loosely with the substrate.	263	26	7.77e-22	3.5e-19	1
GO_COENZYME_BINDING	Interacting selectively and non-covalently with a coenzyme, any of various nonprotein organic cofactors that are required, in addition to an enzyme and a substrate, for an enzymatic reaction to proceed.	179	22	9.71e-21	2.92e-18	1
GO_IDENTICAL_PROTEIN_BINDING	Interacting selectively and non-covalently with an identical protein or proteins.	1209	43	6.77e-18	1.53e-15	4
GO_OXIDOREDUCTASE_ACTIVITY_ACTING_ON_CH_OH_GROUP_OF_DONORS	Catalysis of an oxidation-reduction (redox) reaction in which a CH-OH group act as a hydrogen or electron donor and reduces a hydrogen or electron acceptor.	134	17	1.49e-16	2.69e-14	0
GO_PROTEIN_HOMODIMERIZATION_ACTIVITY	Interacting selectively and non-covalently with an identical protein to form a homodimer.	722	31	2.43e-15	3.65e-13	3
GO_PROTEIN_DIMERIZATION_ACTIVITY	The formation of a protein dimer, a macromolecular structure consists of two noncovalently associated identical or nonidentical subunits.	1149	38	6.52e-15	8.39e-13	3
GO_RECEPTOR_BINDING	Interacting selectively and non-covalently with one or more specific sites on a receptor molecule, a macromolecule that undergoes combination with a hormone, neurotransmitter, drug or intracellular messenger to initiate a change in cell function.	1476	42	3.63e-14	4.09e-12	0
GO_OXIDOREDUCTASE_ACTIVITY_ACTING_ON_THE_CH_OH_GROUP_OF_DONORS_NAD_OR_NADP_AS_ACCEPTOR	Catalysis of an oxidation-reduction (redox) reaction in which a CH-OH group acts as a hydrogen or electron donor and reduces NAD+ or NADP.	113	14	1.02e-13	1.02e-11	0
GO_LYASE_ACTIVITY	Catalysis of the cleavage of C-C, C-O, C-N and other bonds by other means than by hydrolysis or oxidation, or conversely adding a group to a double bond. They differ from other enzymes in that two substrates are involved in one reaction direction, but only one in the other direction. When acting on the single substrate, a molecule is eliminated and this generates either a new double bond or a new…	179	15	4.36e-12	3.62e-10	0
GO_RIBONUCLEOTIDE_BINDING	Interacting selectively and non-covalently with a ribonucleotide, any compound consisting of a ribonucleoside that is esterified with (ortho)phosphate or an oligophosphate at any hydroxyl group on the ribose moiety.	1860	44	4.43e-12	3.62e-10	0
GO_ENZYME_BINDING	Interacting selectively and non-covalently with any enzyme.	1737	42	7.17e-12	5.39e-10	0
GO_OXIDOREDUCTASE_ACTIVITY_ACTING_ON_THE_CH_CH_GROUP_OF_DONORS	Catalysis of an oxidation-reduction (redox) reaction in which a CH-CH group acts as a hydrogen or electron donor and reduces a hydrogen or electron acceptor.	57	10	9.89e-12	6.85e-10	0
GO_ACTIVE_TRANSMEMBRANE_TRANSPORTER_ACTIVITY	Catalysis of the transfer of a specific substance or related group of substances from one side of a membrane to the other, up the solute's concentration gradient. The transporter binds the solute and undergoes a series of conformational changes. Transport works equally well in either direction.	356	19	1.79e-11	1.15e-09	0
GO_ORGANIC_ACID_TRANSMEMBRANE_TRANSPORTER_ACTIVITY	Enables the transfer of organic acids, any acidic compound containing carbon in covalent linkage, from one side of the membrane to the other.	142	13	3.89e-11	2.21e-09	0
GO_HYDROLASE_ACTIVITY_ACTING_ON_ESTER_BONDS	Catalysis of the hydrolysis of any ester bond.	739	26	3.92e-11	2.21e-09	0
GO_TRANSFERASE_ACTIVITY_TRANSFERRING_ACYL_GROUPS	Catalysis of the transfer of an acyl group from one compound (donor) to another (acceptor).	249	16	4.7e-11	2.4e-09	0
GO_TRANSITION_METAL_ION_BINDING	Interacting selectively and non-covalently with a transition metal ions; a transition metal is an element whose atom has an incomplete d-subshell of extranuclear electrons, or which gives rise to a cation or cations with an incomplete d-subshell. Transition metals often have more than one valency state. Biologically relevant transition metals include vanadium, manganese, iron, copper, cobalt, nic…	1400	36	4.8e-11	2.4e-09	0
GO_ORGANIC_ANION_TRANSMEMBRANE_TRANSPORTER_ACTIVITY	Enables the transfer of organic anions from one side of a membrane to the other. Organic anions are atoms or small molecules with a negative charge which contain carbon in covalent linkage.	178	14	5.34e-11	2.53e-09	0
GO_FLAVIN_ADENINE_DINUCLEOTIDE_BINDING	Interacting selectively and non-covalently with FAD, flavin-adenine dinucleotide, the coenzyme or the prosthetic group of various flavoprotein oxidoreductase enzymes, in either the oxidized form, FAD, or the reduced form, FADH2.	74	10	1.48e-10	6.66e-09	0
GO_TRANSPORTER_ACTIVITY	Enables the directed movement of substances (such as macromolecules, small molecules, ions) into, out of or within a cell, or between cells.	1276	33	2.81e-10	1.2e-08	0
GO_CARBOXYLIC_ESTER_HYDROLASE_ACTIVITY	Catalysis of the hydrolysis of a carboxylic ester bond.	135	12	3.13e-10	1.28e-08	0
GO_ADENYL_NUCLEOTIDE_BINDING	Interacting selectively and non-covalently with adenyl nucleotides, any compound consisting of adenosine esterified with (ortho)phosphate.	1514	36	4.03e-10	1.58e-08	0
GO_SYMPORTER_ACTIVITY	Enables the active transport of a solute across a membrane by a mechanism whereby two or more species are transported together in the same direction in a tightly coupled process not directly linked to a form of energy other than chemiosmotic energy.	142	12	5.62e-10	2.11e-08	0
GO_ELECTRON_CARRIER_ACTIVITY	Any molecular entity that serves as an electron acceptor and electron donor in an electron transport chain. An electron transport chain is a process in which a series of electron carriers operate together to transfer electrons from donors to any of several different terminal electron acceptors to generate a transmembrane electrochemical gradient.	112	11	5.91e-10	2.13e-08	0
GO_TRANSMEMBRANE_TRANSPORTER_ACTIVITY	Enables the transfer of a substance from one side of a membrane to the other.	997	28	1.13e-09	3.9e-08	0
GO_SULFUR_COMPOUND_BINDING	Interacting selectively and non-covalently with a sulfur compound.	234	14	1.95e-09	6.52e-08	0
GO_FATTY_ACYL_COA_BINDING	Interacting selectively and non-covalently with acyl-CoA, any derivative of coenzyme A in which the sulfhydryl group is in thiolester linkage with a fatty acyl group.	31	7	2.05e-09	6.6e-08	0
GO_THIOLESTER_HYDROLASE_ACTIVITY	Catalysis of the reaction: RCO-SR' + H2O = RCOOH + HSR'. This reaction is the hydrolysis of a thiolester bond, an ester formed from a carboxylic acid and a thiol (i.e., RCO-SR'), such as that found in acetyl-coenzyme A.	33	7	3.29e-09	1.02e-07	0
GO_TETRAPYRROLE_BINDING	Interacting selectively and non-covalently with a tetrapyrrole, a compound containing four pyrrole nuclei variously substituted and linked to each other through carbons at the alpha position.	134	11	4.03e-09	1.21e-07	0

## Sheet: GO-MF_detail
Gene Set Name	Gene Id	Gene Symbol	Description	Fold Change	ANOVA p-value
GO_OXIDOREDUCTASE_ACTIVITY	3162	HMOX1	heme oxygenase (decycling) 1	1.56257	0.0232432
GO_OXIDOREDUCTASE_ACTIVITY	873	CBR1	carbonyl reductase 1	1.60544	0.00024507
GO_OXIDOREDUCTASE_ACTIVITY	4715	NDUFB9	NADH dehydrogenase (ubiquinone) 1 beta subcomplex, 9, 22kDa	1.63818	0.0326675
GO_OXIDOREDUCTASE_ACTIVITY	1582	CYP8B1	cytochrome P450, family 8, subfamily B, polypeptide 1	3.55399	0.00785468
GO_OXIDOREDUCTASE_ACTIVITY	6999	TDO2	tryptophan 2,3-dioxygenase	1.54417	0.00989422
GO_OXIDOREDUCTASE_ACTIVITY	8608	RDH16	retinol dehydrogenase 16 (all-trans)	1.6667	0.00456152
GO_OXIDOREDUCTASE_ACTIVITY	1962	EHHADH	enoyl-CoA, hydratase/3-hydroxyacyl CoA dehydrogenase	9.64907	0.000126974
GO_OXIDOREDUCTASE_ACTIVITY	224	ALDH3A2	aldehyde dehydrogenase 3 family, member A2	3.5243	0.00086725
GO_OXIDOREDUCTASE_ACTIVITY	4129	MAOB	monoamine oxidase B	1.63753	0.00256494
GO_OXIDOREDUCTASE_ACTIVITY	4329	ALDH6A1	aldehyde dehydrogenase 6 family, member A1	1.55718	0.0130025
GO_OXIDOREDUCTASE_ACTIVITY	8424	BBOX1	butyrobetaine (gamma), 2-oxoglutarate dioxygenase (gamma-butyrobetaine hydroxylase) 1	1.59043	0.00889699
GO_OXIDOREDUCTASE_ACTIVITY	51170	HSD17B11	hydroxysteroid (17-beta) dehydrogenase 11	2.21898	0.00142
GO_OXIDOREDUCTASE_ACTIVITY	2820	GPD2	glycerol-3-phosphate dehydrogenase 2 (mitochondrial)	1.58725	0.0356215
GO_OXIDOREDUCTASE_ACTIVITY	4524	MTHFR	methylenetetrahydrofolate reductase (NAD(P)H)	1.66844	0.0183477
GO_OXIDOREDUCTASE_ACTIVITY	1576	CYP3A4	cytochrome P450, family 3, subfamily A, polypeptide 4	2.18741	0.000111938
GO_OXIDOREDUCTASE_ACTIVITY	2745	GLRX	glutaredoxin (thioltransferase)	2.03647	0.00779883
GO_OXIDOREDUCTASE_ACTIVITY	1371	CPOX	coproporphyrinogen oxidase	1.91579	0.000180559
GO_OXIDOREDUCTASE_ACTIVITY	51302	CYP39A1	cytochrome P450, family 39, subfamily A, polypeptide 1	2.42464	0.00251403
GO_OXIDOREDUCTASE_ACTIVITY	1580	CYP4B1	cytochrome P450, family 4, subfamily B, polypeptide 1	1.52747	0.0026546
GO_OXIDOREDUCTASE_ACTIVITY	6391	SDHC	succinate dehydrogenase complex, subunit C, integral membrane protein, 15kDa	1.62795	0.00613126
GO_OXIDOREDUCTASE_ACTIVITY	3030	HADHA	hydroxyacyl-CoA dehydrogenase/3-ketoacyl-CoA thiolase/enoyl-CoA hydratase (trifunctional protein), alpha subunit	1.54394	0.000306471
GO_OXIDOREDUCTASE_ACTIVITY	2157	F8	coagulation factor VIII, procoagulant component	1.54088	0.0141895
GO_OXIDOREDUCTASE_ACTIVITY	847	CAT	catalase	1.60446	0.00171348
GO_OXIDOREDUCTASE_ACTIVITY	2731	GLDC	glycine dehydrogenase (decarboxylating)	2.24637	0.000863899
GO_OXIDOREDUCTASE_ACTIVITY	392636	AGMO	alkylglycerol monooxygenase	1.78901	0.00121152
GO_OXIDOREDUCTASE_ACTIVITY	84129	ACAD11	acyl-CoA dehydrogenase family, member 11	1.67146	0.000646651
GO_OXIDOREDUCTASE_ACTIVITY	33	ACADL	acyl-CoA dehydrogenase, long chain	1.72816	0.0028287
GO_OXIDOREDUCTASE_ACTIVITY	1666	DECR1	2,4-dienoyl CoA reductase 1, mitochondrial	1.7845	0.000543546
GO_OXIDOREDUCTASE_ACTIVITY	2326	FMO1	flavin containing monooxygenase 1	1.84427	0.000408961
GO_OXIDOREDUCTASE_ACTIVITY	4696	NDUFA3	NADH dehydrogenase (ubiquinone) 1 alpha subcomplex, 3, 9kDa	1.53457	0.0134308
GO_OXIDOREDUCTASE_ACTIVITY	3032	HADHB	hydroxyacyl-CoA dehydrogenase/3-ketoacyl-CoA thiolase/enoyl-CoA hydratase (trifunctional protein), beta subunit	1.92885	0.000229025
GO_OXIDOREDUCTASE_ACTIVITY	54884	RETSAT	retinol saturase (all-trans-retinol 13,14-reductase)	4.89906	9.08576e-05
GO_OXIDOREDUCTASE_ACTIVITY	8804	CREG1	cellular repressor of E1A-stimulated genes 1	1.60634	0.00313283
GO_OXIDOREDUCTASE_ACTIVITY	50814	NSDHL	NAD(P) dependent steroid dehydrogenase-like	-2.14416	0.00831368
GO_OXIDOREDUCTASE_ACTIVITY	2110	ETFDH	electron-transferring-flavoprotein dehydrogenase	1.79156	0.00020707
GO_OXIDOREDUCTASE_ACTIVITY	3033	HADH	hydroxyacyl-CoA dehydrogenase	1.52063	0.000393585
GO_OXIDOREDUCTASE_ACTIVITY	2531	KDSR	3-ketodihydrosphingosine reductase	1.50092	0.00438066
GO_OXIDOREDUCTASE_ACTIVITY	3156	HMGCR	3-hydroxy-3-methylglutaryl-CoA reductase	-1.61115	0.0191748
GO_OXIDOREDUCTASE_ACTIVITY	1595	CYP51A1	cytochrome P450, family 51, subfamily A, polypeptide 1	-2.46406	0.00328032
GO_OXIDOREDUCTASE_ACTIVITY	9446	GSTO1	glutathione S-transferase omega 1	1.52302	0.00912031
GO_OXIDOREDUCTASE_ACTIVITY	34	ACADM	acyl-CoA dehydrogenase, C-4 to C-12 straight chain	1.99474	0.000454357
GO_OXIDOREDUCTASE_ACTIVITY	345275	HSD17B13	hydroxysteroid (17-beta) dehydrogenase 13	2.11392	0.000255374
GO_OXIDOREDUCTASE_ACTIVITY	6713	SQLE	squalene epoxidase	-2.98702	0.00195107
GO_OXIDOREDUCTASE_ACTIVITY	51	ACOX1	acyl-CoA oxidase 1, palmitoyl	1.66627	0.00242207
GO_OXIDOREDUCTASE_ACTIVITY	3295	HSD17B4	hydroxysteroid (17-beta) dehydrogenase 4	1.58035	0.000403005
GO_OXIDOREDUCTASE_ACTIVITY	10954	PDIA5	protein disulfide isomerase family A, member 5	-1.51962	0.0279201
GO_OXIDOREDUCTASE_ACTIVITY	6821	SUOX	sulfite oxidase	1.57706	0.00517778
GO_OXIDOREDUCTASE_ACTIVITY	1718	DHCR24	24-dehydrocholesterol reductase	-1.58136	0.0182725
GO_OXIDOREDUCTASE_ACTIVITY	4199	ME1	malic enzyme 1, NADP(+)-dependent, cytosolic	1.98158	0.0424975
GO_OXIDOREDUCTASE_ACTIVITY	10901	DHRS4	dehydrogenase/reductase (SDR family) member 4	1.58677	0.00312422
GO_OXIDOREDUCTASE_ACTIVITY	3290	HSD11B1	hydroxysteroid (11-beta) dehydrogenase 1	1.5875	0.00360464
GO_OXIDOREDUCTASE_ACTIVITY	7412	VCAM1	vascular cell adhesion molecule 1	1.66558	0.00324484
GO_OXIDOREDUCTASE_ACTIVITY	84263	HSDL2	hydroxysteroid dehydrogenase like 2	2.03511	0.000666637
GO_OXIDOREDUCTASE_ACTIVITY	26063	DECR2	2,4-dienoyl CoA reductase 2, peroxisomal	1.90336	0.004052
GO_COFACTOR_BINDING	84129	ACAD11	acyl-CoA dehydrogenase family, member 11	1.67146	0.000646651
GO_COFACTOR_BINDING	33	ACADL	acyl-CoA dehydrogenase, long chain	1.72816	0.0028287
GO_COFACTOR_BINDING	1666	DECR1	2,4-dienoyl CoA reductase 1, mitochondrial	1.7845	0.000543546
GO_COFACTOR_BINDING	2326	FMO1	flavin containing monooxygenase 1	1.84427	0.000408961
GO_COFACTOR_BINDING	8804	CREG1	cellular repressor of E1A-stimulated genes 1	1.60634	0.00313283
GO_COFACTOR_BINDING	10455	ECI2	enoyl-CoA delta isomerase 2	1.74498	0.00178871
GO_COFACTOR_BINDING	2110	ETFDH	electron-transferring-flavoprotein dehydrogenase	1.79156	0.00020707
GO_COFACTOR_BINDING	3030	HADHA	hydroxyacyl-CoA dehydrogenase/3-ketoacyl-CoA thiolase/enoyl-CoA hydratase (trifunctional protein), alpha subunit	1.54394	0.000306471
GO_COFACTOR_BINDING	847	CAT	catalase	1.60446	0.00171348
GO_COFACTOR_BINDING	4129	MAOB	monoamine oxidase B	1.63753	0.00256494
GO_COFACTOR_BINDING	38	ACAT1	acetyl-CoA acetyltransferase 1	1.77339	0.000855305
GO_COFACTOR_BINDING	1491	CTH	cystathionase (cystathionine gamma-lyase)	1.64867	0.00943928
GO_COFACTOR_BINDING	4329	ALDH6A1	aldehyde dehydrogenase 6 family, member A1	1.55718	0.0130025
GO_COFACTOR_BINDING	4524	MTHFR	methylenetetrahydrofolate reductase (NAD(P)H)	1.66844	0.0183477
GO_COFACTOR_BINDING	51166	AADAT	aminoadipate aminotransferase	1.53724	0.0176972
GO_COFACTOR_BINDING	6821	SUOX	sulfite oxidase	1.57706	0.00517778
GO_COFACTOR_BINDING	1718	DHCR24	24-dehydrocholesterol reductase	-1.58136	0.0182725
GO_COFACTOR_BINDING	4199	ME1	malic enzyme 1, NADP(+)-dependent, cytosolic	1.98158	0.0424975
GO_COFACTOR_BINDING	34	ACADM	acyl-CoA dehydrogenase, C-4 to C-12 straight chain	1.99474	0.000454357
GO_COFACTOR_BINDING	6713	SQLE	squalene epoxidase	-2.98702	0.00195107
GO_COFACTOR_BINDING	51380	CSAD	cysteine sulfinic acid decarboxylase	1.73646	0.0117777
GO_COFACTOR_BINDING	26061	HACL1	2-hydroxyacyl-CoA lyase 1	2.10651	0.000775308
GO_COFACTOR_BINDING	51	ACOX1	acyl-CoA oxidase 1, palmitoyl	1.66627	0.00242207
GO_COFACTOR_BINDING	2729	GCLC	glutamate-cysteine ligase, catalytic subunit	1.91732	0.0112782
GO_COFACTOR_BINDING	3033	HADH	hydroxyacyl-CoA dehydrogenase	1.52063	0.000393585
GO_COFACTOR_BINDING	3156	HMGCR	3-hydroxy-3-methylglutaryl-CoA reductase	-1.61115	0.0191748
GO_COENZYME_BINDING	1718	DHCR24	24-dehydrocholesterol reductase	-1.58136	0.0182725
GO_COENZYME_BINDING	4199	ME1	malic enzyme 1, NADP(+)-dependent, cytosolic	1.98158	0.0424975
GO_COENZYME_BINDING	6821	SUOX	sulfite oxidase	1.57706	0.00517778
GO_COENZYME_BINDING	3156	HMGCR	3-hydroxy-3-methylglutaryl-CoA reductase	-1.61115	0.0191748
GO_COENZYME_BINDING	3033	HADH	hydroxyacyl-CoA dehydrogenase	1.52063	0.000393585
GO_COENZYME_BINDING	2729	GCLC	glutamate-cysteine ligase, catalytic subunit	1.91732	0.0112782
GO_COENZYME_BINDING	26061	HACL1	2-hydroxyacyl-CoA lyase 1	2.10651	0.000775308
GO_COENZYME_BINDING	51	ACOX1	acyl-CoA oxidase 1, palmitoyl	1.66627	0.00242207
GO_COENZYME_BINDING	6713	SQLE	squalene epoxidase	-2.98702	0.00195107
GO_COENZYME_BINDING	34	ACADM	acyl-CoA dehydrogenase, C-4 to C-12 straight chain	1.99474	0.000454357
GO_COENZYME_BINDING	3030	HADHA	hydroxyacyl-CoA dehydrogenase/3-ketoacyl-CoA thiolase/enoyl-CoA hydratase (trifunctional protein), alpha subunit	1.54394	0.000306471
GO_COENZYME_BINDING	847	CAT	catalase	1.60446	0.00171348
GO_COENZYME_BINDING	10455	ECI2	enoyl-CoA delta isomerase 2	1.74498	0.00178871
GO_COENZYME_BINDING	2110	ETFDH	electron-transferring-flavoprotein dehydrogenase	1.79156	0.00020707
GO_COENZYME_BINDING	1666	DECR1	2,4-dienoyl CoA reductase 1, mitochondrial	1.7845	0.000543546
GO_COENZYME_BINDING	2326	FMO1	flavin containing monooxygenase 1	1.84427	0.000408961
GO_COENZYME_BINDING	84129	ACAD11	acyl-CoA dehydrogenase family, member 11	1.67146	0.000646651
GO_COENZYME_BINDING	33	ACADL	acyl-CoA dehydrogenase, long chain	1.72816	0.0028287
GO_COENZYME_BINDING	4524	MTHFR	methylenetetrahydrofolate reductase (NAD(P)H)	1.66844	0.0183477
GO_COENZYME_BINDING	4329	ALDH6A1	aldehyde dehydrogenase 6 family, member A1	1.55718	0.0130025
GO_COENZYME_BINDING	38	ACAT1	acetyl-CoA acetyltransferase 1	1.77339	0.000855305
GO_COENZYME_BINDING	4129	MAOB	monoamine oxidase B	1.63753	0.00256494
GO_IDENTICAL_PROTEIN_BINDING	225	ABCD2	ATP-binding cassette, sub-family D (ALD), member 2	1.80682	0.0319243
GO_IDENTICAL_PROTEIN_BINDING	2944	GSTM1	glutathione S-transferase mu 1	1.53353	0.0245594
GO_IDENTICAL_PROTEIN_BINDING	634	CEACAM1	carcinoembryonic antigen-related cell adhesion molecule 1 (biliary glycoprotein)	1.50125	0.00224974
GO_IDENTICAL_PROTEIN_BINDING	8553	BHLHE40	basic helix-loop-helix family, member e40	-1.53218	0.0447345
GO_IDENTICAL_PROTEIN_BINDING	283	ANG	angiogenin, ribonuclease, RNase A family, 5	-2.27736	0.0190897
GO_IDENTICAL_PROTEIN_BINDING	134266	GRPEL2	GrpE-like 2, mitochondrial (E. coli)	1.52803	0.00612424
GO_IDENTICAL_PROTEIN_BINDING	4953	ODC1	ornithine decarboxylase 1	1.62416	0.00584339
GO_IDENTICAL_PROTEIN_BINDING	2941	GSTA4	glutathione S-transferase alpha 4	1.59347	0.049026
GO_IDENTICAL_PROTEIN_BINDING	1632	ECI1	enoyl-CoA delta isomerase 1	1.7211	0.00210442
GO_IDENTICAL_PROTEIN_BINDING	4209	MEF2D	myocyte enhancer factor 2D	1.6649	0.00855838
GO_IDENTICAL_PROTEIN_BINDING	3295	HSD17B4	hydroxysteroid (17-beta) dehydrogenase 4	1.58035	0.000403005
GO_IDENTICAL_PROTEIN_BINDING	5444	PON1	paraoxonase 1	1.51404	0.00152714
GO_IDENTICAL_PROTEIN_BINDING	10247	HRSP12	heat-responsive protein 12	1.55689	0.00155555
GO_IDENTICAL_PROTEIN_BINDING	26061	HACL1	2-hydroxyacyl-CoA lyase 1	2.10651	0.000775308
GO_IDENTICAL_PROTEIN_BINDING	34	ACADM	acyl-CoA dehydrogenase, C-4 to C-12 straight chain	1.99474	0.000454357
GO_IDENTICAL_PROTEIN_BINDING	6566	SLC16A1	solute carrier family 16, member 1 (monocarboxylic acid transporter 1)	2.16833	0.0025293
GO_IDENTICAL_PROTEIN_BINDING	3156	HMGCR	3-hydroxy-3-methylglutaryl-CoA reductase	-1.61115	0.0191748
GO_IDENTICAL_PROTEIN_BINDING	64225	ATL2	atlastin GTPase 2	1.51819	0.00451149
GO_IDENTICAL_PROTEIN_BINDING	56897	WRNIP1	Werner helicase interacting protein 1	1.51547	0.00512994
GO_IDENTICAL_PROTEIN_BINDING	11343	MGLL	monoglyceride lipase	1.86235	0.00245045
GO_IDENTICAL_PROTEIN_BINDING	2958	GTF2A2	general transcription factor IIA, 2, 12kDa	-1.64628	0.0465577
GO_IDENTICAL_PROTEIN_BINDING	1050	CEBPA	CCAAT/enhancer binding protein (C/EBP), alpha	-1.51687	0.0147935
GO_IDENTICAL_PROTEIN_BINDING	9076	CLDN1	claudin 1	1.73115	0.00595712
GO_IDENTICAL_PROTEIN_BINDING	8800	PEX11A	peroxisomal biogenesis factor 11 alpha	3.57288	0.000654153
GO_IDENTICAL_PROTEIN_BINDING	5825	ABCD3	ATP-binding cassette, sub-family D (ALD), member 3	1.6066	0.00182228
GO_IDENTICAL_PROTEIN_BINDING	9429	ABCG2	ATP-binding cassette, sub-family G (WHITE), member 2	1.80371	0.00152641
GO_IDENTICAL_PROTEIN_BINDING	590	BCHE	butyrylcholinesterase	1.63658	0.000631726
GO_IDENTICAL_PROTEIN_BINDING	972	CD74	CD74 molecule, major histocompatibility complex, class II invariant chain	2.00907	0.00446325
GO_IDENTICAL_PROTEIN_BINDING	847	CAT	catalase	1.60446	0.00171348
GO_IDENTICAL_PROTEIN_BINDING	7069	THRSP	thyroid hormone responsive	-1.6027	0.0223333
GO_IDENTICAL_PROTEIN_BINDING	1371	CPOX	coproporphyrinogen oxidase	1.91579	0.000180559
GO_IDENTICAL_PROTEIN_BINDING	4627	MYH9	myosin, heavy chain 9, non-muscle	-1.50693	0.000996246
GO_IDENTICAL_PROTEIN_BINDING	2053	EPHX2	epoxide hydrolase 2, cytoplasmic	2.12978	0.000393204
GO_IDENTICAL_PROTEIN_BINDING	38	ACAT1	acetyl-CoA acetyltransferase 1	1.77339	0.000855305
GO_IDENTICAL_PROTEIN_BINDING	4129	MAOB	monoamine oxidase B	1.63753	0.00256494
GO_IDENTICAL_PROTEIN_BINDING	51166	AADAT	aminoadipate aminotransferase	1.53724	0.0176972
GO_IDENTICAL_PROTEIN_BINDING	5970	RELA	v-rel reticuloendotheliosis viral oncogene homolog A (avian)	1.53339	0.0222273
GO_IDENTICAL_PROTEIN_BINDING	79872	CBLL1	Cas-Br-M (murine) ecotropic retroviral transforming sequence-like 1	1.64438	0.00995289
GO_IDENTICAL_PROTEIN_BINDING	440503	PLIN5	perilipin 5	2.38038	7.74295e-05
GO_IDENTICAL_PROTEIN_BINDING	51129	ANGPTL4	angiopoietin-like 4	1.5661	0.00324162
GO_IDENTICAL_PROTEIN_BINDING	3953	LEPR	leptin receptor	1.63649	0.00281941
GO_IDENTICAL_PROTEIN_BINDING	1119	CHKA	choline kinase alpha	2.68308	0.00340228
GO_IDENTICAL_PROTEIN_BINDING	3162	HMOX1	heme oxygenase (decycling) 1	1.56257	0.0232432
GO_OXIDOREDUCTASE_ACTIVITY_ACTING_ON_CH_OH_GROUP_OF_DONORS	873	CBR1	carbonyl reductase 1	1.60544	0.00024507
GO_OXIDOREDUCTASE_ACTIVITY_ACTING_ON_CH_OH_GROUP_OF_DONORS	8608	RDH16	retinol dehydrogenase 16 (all-trans)	1.6667	0.00456152
GO_OXIDOREDUCTASE_ACTIVITY_ACTING_ON_CH_OH_GROUP_OF_DONORS	1962	EHHADH	enoyl-CoA, hydratase/3-hydroxyacyl CoA dehydrogenase	9.64907	0.000126974
GO_OXIDOREDUCTASE_ACTIVITY_ACTING_ON_CH_OH_GROUP_OF_DONORS	224	ALDH3A2	aldehyde dehydrogenase 3 family, member A2	3.5243	0.00086725
GO_OXIDOREDUCTASE_ACTIVITY_ACTING_ON_CH_OH_GROUP_OF_DONORS	2820	GPD2	glycerol-3-phosphate dehydrogenase 2 (mitochondrial)	1.58725	0.0356215
GO_OXIDOREDUCTASE_ACTIVITY_ACTING_ON_CH_OH_GROUP_OF_DONORS	51170	HSD17B11	hydroxysteroid (17-beta) dehydrogenase 11	2.21898	0.00142
GO_OXIDOREDUCTASE_ACTIVITY_ACTING_ON_CH_OH_GROUP_OF_DONORS	3030	HADHA	hydroxyacyl-CoA dehydrogenase/3-ketoacyl-CoA thiolase/enoyl-CoA hydratase (trifunctional protein), alpha subunit	1.54394	0.000306471
GO_OXIDOREDUCTASE_ACTIVITY_ACTING_ON_CH_OH_GROUP_OF_DONORS	50814	NSDHL	NAD(P) dependent steroid dehydrogenase-like	-2.14416	0.00831368
GO_OXIDOREDUCTASE_ACTIVITY_ACTING_ON_CH_OH_GROUP_OF_DONORS	3032	HADHB	hydroxyacyl-CoA dehydrogenase/3-ketoacyl-CoA thiolase/enoyl-CoA hydratase (trifunctional protein), beta subunit	1.92885	0.000229025
GO_OXIDOREDUCTASE_ACTIVITY_ACTING_ON_CH_OH_GROUP_OF_DONORS	2531	KDSR	3-ketodihydrosphingosine reductase	1.50092	0.00438066
GO_OXIDOREDUCTASE_ACTIVITY_ACTING_ON_CH_OH_GROUP_OF_DONORS	3033	HADH	hydroxyacyl-CoA dehydrogenase	1.52063	0.000393585
GO_OXIDOREDUCTASE_ACTIVITY_ACTING_ON_CH_OH_GROUP_OF_DONORS	3156	HMGCR	3-hydroxy-3-methylglutaryl-CoA reductase	-1.61115	0.0191748
GO_OXIDOREDUCTASE_ACTIVITY_ACTING_ON_CH_OH_GROUP_OF_DONORS	3295	HSD17B4	hydroxysteroid (17-beta) dehydrogenase 4	1.58035	0.000403005
GO_OXIDOREDUCTASE_ACTIVITY_ACTING_ON_CH_OH_GROUP_OF_DONORS	1718	DHCR24	24-dehydrocholesterol reductase	-1.58136	0.0182725
GO_OXIDOREDUCTASE_ACTIVITY_ACTING_ON_CH_OH_GROUP_OF_DONORS	10901	DHRS4	dehydrogenase/reductase (SDR family) member 4	1.58677	0.00312422
GO_OXIDOREDUCTASE_ACTIVITY_ACTING_ON_CH_OH_GROUP_OF_DONORS	4199	ME1	malic enzyme 1, NADP(+)-dependent, cytosolic	1.98158	0.0424975
GO_OXIDOREDUCTASE_ACTIVITY_ACTING_ON_CH_OH_GROUP_OF_DONORS	3290	HSD11B1	hydroxysteroid (11-beta) dehydrogenase 1	1.5875	0.00360464
GO_PROTEIN_HOMODIMERIZATION_ACTIVITY	2053	EPHX2	epoxide hydrolase 2, cytoplasmic	2.12978	0.000393204
GO_PROTEIN_HOMODIMERIZATION_ACTIVITY	38	ACAT1	acetyl-CoA acetyltransferase 1	1.77339	0.000855305
GO_PROTEIN_HOMODIMERIZATION_ACTIVITY	4129	MAOB	monoamine oxidase B	1.63753	0.00256494
GO_PROTEIN_HOMODIMERIZATION_ACTIVITY	5970	RELA	v-rel reticuloendotheliosis viral oncogene homolog A (avian)	1.53339	0.0222273
GO_PROTEIN_HOMODIMERIZATION_ACTIVITY	51166	AADAT	aminoadipate aminotransferase	1.53724	0.0176972
GO_PROTEIN_HOMODIMERIZATION_ACTIVITY	1119	CHKA	choline kinase alpha	2.68308	0.00340228
GO_PROTEIN_HOMODIMERIZATION_ACTIVITY	3162	HMOX1	heme oxygenase (decycling) 1	1.56257	0.0232432
GO_PROTEIN_HOMODIMERIZATION_ACTIVITY	11343	MGLL	monoglyceride lipase	1.86235	0.00245045
GO_PROTEIN_HOMODIMERIZATION_ACTIVITY	2958	GTF2A2	general transcription factor IIA, 2, 12kDa	-1.64628	0.0465577
GO_PROTEIN_HOMODIMERIZATION_ACTIVITY	1050	CEBPA	CCAAT/enhancer binding protein (C/EBP), alpha	-1.51687	0.0147935
GO_PROTEIN_HOMODIMERIZATION_ACTIVITY	8800	PEX11A	peroxisomal biogenesis factor 11 alpha	3.57288	0.000654153
GO_PROTEIN_HOMODIMERIZATION_ACTIVITY	5825	ABCD3	ATP-binding cassette, sub-family D (ALD), member 3	1.6066	0.00182228
GO_PROTEIN_HOMODIMERIZATION_ACTIVITY	9429	ABCG2	ATP-binding cassette, sub-family G (WHITE), member 2	1.80371	0.00152641
GO_PROTEIN_HOMODIMERIZATION_ACTIVITY	847	CAT	catalase	1.60446	0.00171348
GO_PROTEIN_HOMODIMERIZATION_ACTIVITY	7069	THRSP	thyroid hormone responsive	-1.6027	0.0223333
GO_PROTEIN_HOMODIMERIZATION_ACTIVITY	4627	MYH9	myosin, heavy chain 9, non-muscle	-1.50693	0.000996246
GO_PROTEIN_HOMODIMERIZATION_ACTIVITY	1371	CPOX	coproporphyrinogen oxidase	1.91579	0.000180559
GO_PROTEIN_HOMODIMERIZATION_ACTIVITY	5444	PON1	paraoxonase 1	1.51404	0.00152714
GO_PROTEIN_HOMODIMERIZATION_ACTIVITY	3295	HSD17B4	hydroxysteroid (17-beta) dehydrogenase 4	1.58035	0.000403005
GO_PROTEIN_HOMODIMERIZATION_ACTIVITY	10247	HRSP12	heat-responsive protein 12	1.55689	0.00155555
GO_PROTEIN_HOMODIMERIZATION_ACTIVITY	6566	SLC16A1	solute carrier family 16, member 1 (monocarboxylic acid transporter 1)	2.16833	0.0025293
GO_PROTEIN_HOMODIMERIZATION_ACTIVITY	3156	HMGCR	3-hydroxy-3-methylglutaryl-CoA reductase	-1.61115	0.0191748
GO_PROTEIN_HOMODIMERIZATION_ACTIVITY	225	ABCD2	ATP-binding cassette, sub-family D (ALD), member 2	1.80682	0.0319243
GO_PROTEIN_HOMODIMERIZATION_ACTIVITY	2944	GSTM1	glutathione S-transferase mu 1	1.53353	0.0245594
GO_PROTEIN_HOMODIMERIZATION_ACTIVITY	634	CEACAM1	carcinoembryonic antigen-related cell adhesion molecule 1 (biliary glycoprotein)	1.50125	0.00224974
GO_PROTEIN_HOMODIMERIZATION_ACTIVITY	8553	BHLHE40	basic helix-loop-helix family, member e40	-1.53218	0.0447345
GO_PROTEIN_HOMODIMERIZATION_ACTIVITY	134266	GRPEL2	GrpE-like 2, mitochondrial (E. coli)	1.52803	0.00612424
GO_PROTEIN_HOMODIMERIZATION_ACTIVITY	283	ANG	angiogenin, ribonuclease, RNase A family, 5	-2.27736	0.0190897
GO_PROTEIN_HOMODIMERIZATION_ACTIVITY	4953	ODC1	ornithine decarboxylase 1	1.62416	0.00584339
GO_PROTEIN_HOMODIMERIZATION_ACTIVITY	2941	GSTA4	glutathione S-transferase alpha 4	1.59347	0.049026
GO_PROTEIN_HOMODIMERIZATION_ACTIVITY	4209	MEF2D	myocyte enhancer factor 2D	1.6649	0.00855838
GO_PROTEIN_DIMERIZATION_ACTIVITY	9429	ABCG2	ATP-binding cassette, sub-family G (WHITE), member 2	1.80371	0.00152641
GO_PROTEIN_DIMERIZATION_ACTIVITY	847	CAT	catalase	1.60446	0.00171348
GO_PROTEIN_DIMERIZATION_ACTIVITY	5825	ABCD3	ATP-binding cassette, sub-family D (ALD), member 3	1.6066	0.00182228
GO_PROTEIN_DIMERIZATION_ACTIVITY	1371	CPOX	coproporphyrinogen oxidase	1.91579	0.000180559
GO_PROTEIN_DIMERIZATION_ACTIVITY	4627	MYH9	myosin, heavy chain 9, non-muscle	-1.50693	0.000996246
GO_PROTEIN_DIMERIZATION_ACTIVITY	7069	THRSP	thyroid hormone responsive	-1.6027	0.0223333
GO_PROTEIN_DIMERIZATION_ACTIVITY	9575	CLOCK	clock homolog (mouse)	1.77624	0.000602631
GO_PROTEIN_DIMERIZATION_ACTIVITY	2958	GTF2A2	general transcription factor IIA, 2, 12kDa	-1.64628	0.0465577
GO_PROTEIN_DIMERIZATION_ACTIVITY	11343	MGLL	monoglyceride lipase	1.86235	0.00245045
GO_PROTEIN_DIMERIZATION_ACTIVITY	8800	PEX11A	peroxisomal biogenesis factor 11 alpha	3.57288	0.000654153
GO_PROTEIN_DIMERIZATION_ACTIVITY	1050	CEBPA	CCAAT/enhancer binding protein (C/EBP), alpha	-1.51687	0.0147935
GO_PROTEIN_DIMERIZATION_ACTIVITY	51166	AADAT	aminoadipate aminotransferase	1.53724	0.0176972
GO_PROTEIN_DIMERIZATION_ACTIVITY	5970	RELA	v-rel reticuloendotheliosis viral oncogene homolog A (avian)	1.53339	0.0222273
GO_PROTEIN_DIMERIZATION_ACTIVITY	367	AR	androgen receptor	1.50503	0.0208772
GO_PROTEIN_DIMERIZATION_ACTIVITY	3162	HMOX1	heme oxygenase (decycling) 1	1.56257	0.0232432
GO_PROTEIN_DIMERIZATION_ACTIVITY	1119	CHKA	choline kinase alpha	2.68308	0.00340228
GO_PROTEIN_DIMERIZATION_ACTIVITY	4547	MTTP	microsomal triglyceride transfer protein	1.58083	0.000395105
GO_PROTEIN_DIMERIZATION_ACTIVITY	2053	EPHX2	epoxide hydrolase 2, cytoplasmic	2.12978	0.000393204
GO_PROTEIN_DIMERIZATION_ACTIVITY	4129	MAOB	monoamine oxidase B	1.63753	0.00256494
GO_PROTEIN_DIMERIZATION_ACTIVITY	38	ACAT1	acetyl-CoA acetyltransferase 1	1.77339	0.000855305
GO_PROTEIN_DIMERIZATION_ACTIVITY	4953	ODC1	ornithine decarboxylase 1	1.62416	0.00584339
GO_PROTEIN_DIMERIZATION_ACTIVITY	2941	GSTA4	glutathione S-transferase alpha 4	1.59347	0.049026
GO_PROTEIN_DIMERIZATION_ACTIVITY	4209	MEF2D	myocyte enhancer factor 2D	1.6649	0.00855838
GO_PROTEIN_DIMERIZATION_ACTIVITY	225	ABCD2	ATP-binding cassette, sub-family D (ALD), member 2	1.80682	0.0319243
GO_PROTEIN_DIMERIZATION_ACTIVITY	4862	NPAS2	neuronal PAS domain protein 2	2.11633	0.00161782
GO_PROTEIN_DIMERIZATION_ACTIVITY	2944	GSTM1	glutathione S-transferase mu 1	1.53353	0.0245594
GO_PROTEIN_DIMERIZATION_ACTIVITY	406	ARNTL	aryl hydrocarbon receptor nuclear translocator-like	3.5615	0.000290506
GO_PROTEIN_DIMERIZATION_ACTIVITY	8553	BHLHE40	basic helix-loop-helix family, member e40	-1.53218	0.0447345
GO_PROTEIN_DIMERIZATION_ACTIVITY	283	ANG	angiogenin, ribonuclease, RNase A family, 5	-2.27736	0.0190897
GO_PROTEIN_DIMERIZATION_ACTIVITY	134266	GRPEL2	GrpE-like 2, mitochondrial (E. coli)	1.52803	0.00612424
GO_PROTEIN_DIMERIZATION_ACTIVITY	26256	CABYR	calcium binding tyrosine-(Y)-phosphorylation regulated	-5.21186	0.00557591
GO_PROTEIN_DIMERIZATION_ACTIVITY	634	CEACAM1	carcinoembryonic antigen-related cell adhesion molecule 1 (biliary glycoprotein)	1.50125	0.00224974
GO_PROTEIN_DIMERIZATION_ACTIVITY	3156	HMGCR	3-hydroxy-3-methylglutaryl-CoA reductase	-1.61115	0.0191748
GO_PROTEIN_DIMERIZATION_ACTIVITY	6566	SLC16A1	solute carrier family 16, member 1 (monocarboxylic acid transporter 1)	2.16833	0.0025293
GO_PROTEIN_DIMERIZATION_ACTIVITY	10247	HRSP12	heat-responsive protein 12	1.55689	0.00155555
GO_PROTEIN_DIMERIZATION_ACTIVITY	3295	HSD17B4	hydroxysteroid (17-beta) dehydrogenase 4	1.58035	0.000403005
GO_PROTEIN_DIMERIZATION_ACTIVITY	2729	GCLC	glutamate-cysteine ligase, catalytic subunit	1.91732	0.0112782
GO_PROTEIN_DIMERIZATION_ACTIVITY	5444	PON1	paraoxonase 1	1.51404	0.00152714
GO_RECEPTOR_BINDING	83597	RTP3	receptor (chemosensory) transporter protein 3	1.84824	0.0146719
GO_RECEPTOR_BINDING	27329	ANGPTL3	angiopoietin-like 3	1.50328	0.00531285
GO_RECEPTOR_BINDING	5270	SERPINE2	serpin peptidase inhibitor, clade E (nexin, plasminogen activator inhibitor type 1), member 2	1.62119	0.00408842
GO_RECEPTOR_BINDING	2621	GAS6	growth arrest-specific 6	-2.46472	0.00347183
GO_RECEPTOR_BINDING	10455	ECI2	enoyl-CoA delta isomerase 2	1.74498	0.00178871
GO_RECEPTOR_BINDING	1890	TYMP	thymidine phosphorylase	2.07655	0.0062045
GO_RECEPTOR_BINDING	972	CD74	CD74 molecule, major histocompatibility complex, class II invariant chain	2.00907	0.00446325
GO_RECEPTOR_BINDING	847	CAT	catalase	1.60446	0.00171348
GO_RECEPTOR_BINDING	1407	CRY1	cryptochrome 1 (photolyase-like)	2.34398	0.00040721
GO_RECEPTOR_BINDING	9630	GNA14	guanine nucleotide binding protein (G protein), alpha 14	-1.56325	0.0334803
GO_RECEPTOR_BINDING	6696	SPP1	secreted phosphoprotein 1	-2.58567	0.0263611
GO_RECEPTOR_BINDING	122970	ACOT4	acyl-CoA thioesterase 4	3.38432	0.00368984
GO_RECEPTOR_BINDING	2053	EPHX2	epoxide hydrolase 2, cytoplasmic	2.12978	0.000393204
GO_RECEPTOR_BINDING	3312	HSPA8	heat shock 70kDa protein 8	1.5283	0.00463497
GO_RECEPTOR_BINDING	367	AR	androgen receptor	1.50503	0.0208772
GO_RECEPTOR_BINDING	2896	GRN	granulin	1.651	0.00866615
GO_RECEPTOR_BINDING	8660	IRS2	insulin receptor substrate 2	1.76076	0.0410914
GO_RECEPTOR_BINDING	9547	CXCL14	chemokine (C-X-C motif) ligand 14	-3.1521	0.000946541
GO_RECEPTOR_BINDING	1962	EHHADH	enoyl-CoA, hydratase/3-hydroxyacyl CoA dehydrogenase	9.64907	0.000126974
GO_RECEPTOR_BINDING	283	ANG	angiogenin, ribonuclease, RNase A family, 5	-2.27736	0.0190897
GO_RECEPTOR_BINDING	3485	IGFBP2	insulin-like growth factor binding protein 2, 36kDa	2.34147	0.012076
GO_RECEPTOR_BINDING	488	ATP2A2	ATPase, Ca++ transporting, cardiac muscle, slow twitch 2	1.91167	0.00039089
GO_RECEPTOR_BINDING	54677	CROT	carnitine O-octanoyltransferase	1.87563	0.000840794
GO_RECEPTOR_BINDING	26063	DECR2	2,4-dienoyl CoA reductase 2, peroxisomal	1.90336	0.004052
GO_RECEPTOR_BINDING	406	ARNTL	aryl hydrocarbon receptor nuclear translocator-like	3.5615	0.000290506
GO_RECEPTOR_BINDING	10901	DHRS4	dehydrogenase/reductase (SDR family) member 4	1.58677	0.00312422
GO_RECEPTOR_BINDING	2779	GNAT1	guanine nucleotide binding protein (G protein), alpha transducing activity polypeptide 1	-1.61589	0.0181812
GO_RECEPTOR_BINDING	3626	INHBC	inhibin, beta C	1.51218	0.0131224
GO_RECEPTOR_BINDING	1891	ECH1	enoyl CoA hydratase 1, peroxisomal	1.6658	0.00260057
GO_RECEPTOR_BINDING	7412	VCAM1	vascular cell adhesion molecule 1	1.66558	0.00324484
GO_RECEPTOR_BINDING	10965	ACOT2	acyl-CoA thioesterase 2	4.63269	0.0062207
GO_RECEPTOR_BINDING	841	CASP8	caspase 8, apoptosis-related cysteine peptidase	1.73114	0.0138296
GO_RECEPTOR_BINDING	57817	HAMP	hepcidin antimicrobial peptide	2.43666	0.0403913
GO_RECEPTOR_BINDING	1384	CRAT	carnitine O-acetyltransferase	2.85378	0.00285356
GO_RECEPTOR_BINDING	51	ACOX1	acyl-CoA oxidase 1, palmitoyl	1.66627	0.00242207
GO_RECEPTOR_BINDING	26061	HACL1	2-hydroxyacyl-CoA lyase 1	2.10651	0.000775308
GO_RECEPTOR_BINDING	4969	OGN	osteoglycin	1.73328	0.024935
GO_RECEPTOR_BINDING	3295	HSD17B4	hydroxysteroid (17-beta) dehydrogenase 4	1.58035	0.000403005
GO_RECEPTOR_BINDING	283927	NUDT7	nudix (nucleoside diphosphate linked moiety X)-type motif 7	-2.17292	0.0458252
GO_RECEPTOR_BINDING	56246	MRAP	melanocortin 2 receptor accessory protein	1.83763	0.00151645
GO_RECEPTOR_BINDING	975	CD81	CD81 molecule	1.61804	0.0159953
GO_RECEPTOR_BINDING	55681	SCYL2	SCY1-like 2 (S. cerevisiae)	1.51395	0.000335582
GO_OXIDOREDUCTASE_ACTIVITY_ACTING_ON_THE_CH_OH_GROUP_OF_DONORS_NAD_OR_NADP_AS_ACCEPTOR	3295	HSD17B4	hydroxysteroid (17-beta) dehydrogenase 4	1.58035	0.000403005
GO_OXIDOREDUCTASE_ACTIVITY_ACTING_ON_THE_CH_OH_GROUP_OF_DONORS_NAD_OR_NADP_AS_ACCEPTOR	2531	KDSR	3-ketodihydrosphingosine reductase	1.50092	0.00438066
GO_OXIDOREDUCTASE_ACTIVITY_ACTING_ON_THE_CH_OH_GROUP_OF_DONORS_NAD_OR_NADP_AS_ACCEPTOR	3033	HADH	hydroxyacyl-CoA dehydrogenase	1.52063	0.000393585
GO_OXIDOREDUCTASE_ACTIVITY_ACTING_ON_THE_CH_OH_GROUP_OF_DONORS_NAD_OR_NADP_AS_ACCEPTOR	3156	HMGCR	3-hydroxy-3-methylglutaryl-CoA reductase	-1.61115	0.0191748
GO_OXIDOREDUCTASE_ACTIVITY_ACTING_ON_THE_CH_OH_GROUP_OF_DONORS_NAD_OR_NADP_AS_ACCEPTOR	10901	DHRS4	dehydrogenase/reductase (SDR family) member 4	1.58677	0.00312422
GO_OXIDOREDUCTASE_ACTIVITY_ACTING_ON_THE_CH_OH_GROUP_OF_DONORS_NAD_OR_NADP_AS_ACCEPTOR	4199	ME1	malic enzyme 1, NADP(+)-dependent, cytosolic	1.98158	0.0424975
GO_OXIDOREDUCTASE_ACTIVITY_ACTING_ON_THE_CH_OH_GROUP_OF_DONORS_NAD_OR_NADP_AS_ACCEPTOR	3290	HSD11B1	hydroxysteroid (11-beta) dehydrogenase 1	1.5875	0.00360464
GO_OXIDOREDUCTASE_ACTIVITY_ACTING_ON_THE_CH_OH_GROUP_OF_DONORS_NAD_OR_NADP_AS_ACCEPTOR	51170	HSD17B11	hydroxysteroid (17-beta) dehydrogenase 11	2.21898	0.00142
GO_OXIDOREDUCTASE_ACTIVITY_ACTING_ON_THE_CH_OH_GROUP_OF_DONORS_NAD_OR_NADP_AS_ACCEPTOR	873	CBR1	carbonyl reductase 1	1.60544	0.00024507
GO_OXIDOREDUCTASE_ACTIVITY_ACTING_ON_THE_CH_OH_GROUP_OF_DONORS_NAD_OR_NADP_AS_ACCEPTOR	8608	RDH16	retinol dehydrogenase 16 (all-trans)	1.6667	0.00456152
GO_OXIDOREDUCTASE_ACTIVITY_ACTING_ON_THE_CH_OH_GROUP_OF_DONORS_NAD_OR_NADP_AS_ACCEPTOR	1962	EHHADH	enoyl-CoA, hydratase/3-hydroxyacyl CoA dehydrogenase	9.64907	0.000126974
GO_OXIDOREDUCTASE_ACTIVITY_ACTING_ON_THE_CH_OH_GROUP_OF_DONORS_NAD_OR_NADP_AS_ACCEPTOR	50814	NSDHL	NAD(P) dependent steroid dehydrogenase-like	-2.14416	0.00831368
GO_OXIDOREDUCTASE_ACTIVITY_ACTING_ON_THE_CH_OH_GROUP_OF_DONORS_NAD_OR_NADP_AS_ACCEPTOR	3032	HADHB	hydroxyacyl-CoA dehydrogenase/3-ketoacyl-CoA thiolase/enoyl-CoA hydratase (trifunctional protein), beta subunit	1.92885	0.000229025
GO_OXIDOREDUCTASE_ACTIVITY_ACTING_ON_THE_CH_OH_GROUP_OF_DONORS_NAD_OR_NADP_AS_ACCEPTOR	3030	HADHA	hydroxyacyl-CoA dehydrogenase/3-ketoacyl-CoA thiolase/enoyl-CoA hydratase (trifunctional protein), alpha subunit	1.54394	0.000306471
GO_LYASE_ACTIVITY	3295	HSD17B4	hydroxysteroid (17-beta) dehydrogenase 4	1.58035	0.000403005
GO_LYASE_ACTIVITY	26061	HACL1	2-hydroxyacyl-CoA lyase 1	2.10651	0.000775308
GO_LYASE_ACTIVITY	435	ASL	argininosuccinate lyase	1.53763	0.0277105
GO_LYASE_ACTIVITY	51380	CSAD	cysteine sulfinic acid decarboxylase	1.73646	0.0117777
GO_LYASE_ACTIVITY	4953	ODC1	ornithine decarboxylase 1	1.62416	0.00584339
GO_LYASE_ACTIVITY	4199	ME1	malic enzyme 1, NADP(+)-dependent, cytosolic	1.98158	0.0424975
GO_LYASE_ACTIVITY	1491	CTH	cystathionase (cystathionine gamma-lyase)	1.64867	0.00943928
GO_LYASE_ACTIVITY	3034	HAL	histidine ammonia-lyase	1.89235	0.0132952
GO_LYASE_ACTIVITY	1962	EHHADH	enoyl-CoA, hydratase/3-hydroxyacyl CoA dehydrogenase	9.64907	0.000126974
GO_LYASE_ACTIVITY	3032	HADHB	hydroxyacyl-CoA dehydrogenase/3-ketoacyl-CoA thiolase/enoyl-CoA hydratase (trifunctional protein), beta subunit	1.92885	0.000229025
GO_LYASE_ACTIVITY	2731	GLDC	glycine dehydrogenase (decarboxylating)	2.24637	0.000863899
GO_LYASE_ACTIVITY	1407	CRY1	cryptochrome 1 (photolyase-like)	2.34398	0.00040721
GO_LYASE_ACTIVITY	3030	HADHA	hydroxyacyl-CoA dehydrogenase/3-ketoacyl-CoA thiolase/enoyl-CoA hydratase (trifunctional protein), alpha subunit	1.54394	0.000306471
GO_LYASE_ACTIVITY	761	CA3	carbonic anhydrase III, muscle specific	2.60538	0.00219411
GO_LYASE_ACTIVITY	2984	GUCY2C	guanylate cyclase 2C (heat stable enterotoxin receptor)	-1.67592	0.0313742
GO_RIBONUCLEOTIDE_BINDING	4627	MYH9	myosin, heavy chain 9, non-muscle	-1.50693	0.000996246
GO_RIBONUCLEOTIDE_BINDING	2984	GUCY2C	guanylate cyclase 2C (heat stable enterotoxin receptor)	-1.67592	0.0313742
GO_RIBONUCLEOTIDE_BINDING	9429	ABCG2	ATP-binding cassette, sub-family G (WHITE), member 2	1.80371	0.00152641
GO_RIBONUCLEOTIDE_BINDING	5825	ABCD3	ATP-binding cassette, sub-family D (ALD), member 3	1.6066	0.00182228
GO_RIBONUCLEOTIDE_BINDING	9630	GNA14	guanine nucleotide binding protein (G protein), alpha 14	-1.56325	0.0334803
GO_RIBONUCLEOTIDE_BINDING	5244	ABCB4	ATP-binding cassette, sub-family B (MDR/TAP), member 4	1.52019	0.0043556
GO_RIBONUCLEOTIDE_BINDING	3309	HSPA5	heat shock 70kDa protein 5 (glucose-regulated protein, 78kDa)	1.50922	0.0237466
GO_RIBONUCLEOTIDE_BINDING	64135	IFIH1	interferon induced with helicase C domain 1	-1.52858	0.0394221
GO_RIBONUCLEOTIDE_BINDING	387751	GVINP1	GTPase, very large interferon inducible pseudogene 1	-1.79654	0.0201247
GO_RIBONUCLEOTIDE_BINDING	8804	CREG1	cellular repressor of E1A-stimulated genes 1	1.60634	0.00313283
GO_RIBONUCLEOTIDE_BINDING	6296	ACSM3	acyl-CoA synthetase medium-chain family member 3	1.55279	0.0151525
GO_RIBONUCLEOTIDE_BINDING	51128	SAR1B	SAR1 homolog B (S. cerevisiae)	1.62151	0.0006586
GO_RIBONUCLEOTIDE_BINDING	7277	TUBA4A	tubulin, alpha 4a	1.95742	0.00626406
GO_RIBONUCLEOTIDE_BINDING	1119	CHKA	choline kinase alpha	2.68308	0.00340228
GO_RIBONUCLEOTIDE_BINDING	79611	ACSS3	acyl-CoA synthetase short-chain family member 3	2.04006	0.0150236
GO_RIBONUCLEOTIDE_BINDING	5166	PDK4	pyruvate dehydrogenase kinase, isozyme 4	4.66084	0.00209195
GO_RIBONUCLEOTIDE_BINDING	51703	ACSL5	acyl-CoA synthetase long-chain family member 5	1.6176	0.000648662
GO_RIBONUCLEOTIDE_BINDING	23250	ATP11A	ATPase, class VI, type 11A	-2.86629	0.0111107
GO_RIBONUCLEOTIDE_BINDING	2180	ACSL1	acyl-CoA synthetase long-chain family member 1	3.24665	0.00047773
GO_RIBONUCLEOTIDE_BINDING	2710	GK	glycerol kinase	1.6816	0.0019605
GO_RIBONUCLEOTIDE_BINDING	30845	EHD3	EH-domain containing 3	1.69905	0.00697414
GO_RIBONUCLEOTIDE_BINDING	27314	RAB30	RAB30, member RAS oncogene family	1.85987	0.000370926
GO_RIBONUCLEOTIDE_BINDING	3312	HSPA8	heat shock 70kDa protein 8	1.5283	0.00463497
GO_RIBONUCLEOTIDE_BINDING	6584	SLC22A5	solute carrier family 22 (organic cation/carnitine transporter), member 5	2.19767	0.00263368
GO_RIBONUCLEOTIDE_BINDING	2779	GNAT1	guanine nucleotide binding protein (G protein), alpha transducing activity polypeptide 1	-1.61589	0.0181812
GO_RIBONUCLEOTIDE_BINDING	4199	ME1	malic enzyme 1, NADP(+)-dependent, cytosolic	1.98158	0.0424975
GO_RIBONUCLEOTIDE_BINDING	80216	ALPK1	alpha-kinase 1	-2.57373	0.00510243
GO_RIBONUCLEOTIDE_BINDING	488	ATP2A2	ATPase, Ca++ transporting, cardiac muscle, slow twitch 2	1.91167	0.00039089
GO_RIBONUCLEOTIDE_BINDING	225	ABCD2	ATP-binding cassette, sub-family D (ALD), member 2	1.80682	0.0319243
GO_RIBONUCLEOTIDE_BINDING	283459	GATC	glutamyl-tRNA(Gln) amidotransferase, subunit C homolog (bacterial)	1.57923	0.00814744
GO_RIBONUCLEOTIDE_BINDING	7280	TUBB2A	tubulin, beta 2A class IIa	3.90204	0.00356153
GO_RIBONUCLEOTIDE_BINDING	8714	ABCC3	ATP-binding cassette, sub-family C (CFTR/MRP), member 3	2.14302	0.00354122
GO_RIBONUCLEOTIDE_BINDING	10110	SGK2	serum/glucocorticoid regulated kinase 2	1.54821	0.0439451
GO_RIBONUCLEOTIDE_BINDING	56897	WRNIP1	Werner helicase interacting protein 1	1.51547	0.00512994
GO_RIBONUCLEOTIDE_BINDING	53354	PANK1	pantothenate kinase 1	1.50012	0.00261402
GO_RIBONUCLEOTIDE_BINDING	10808	HSPH1	heat shock 105kDa/110kDa protein 1	1.90561	0.000897429
GO_RIBONUCLEOTIDE_BINDING	9367	RAB9A	RAB9A, member RAS oncogene family	1.56683	0.0121649
GO_RIBONUCLEOTIDE_BINDING	64225	ATL2	atlastin GTPase 2	1.51819	0.00451149
GO_RIBONUCLEOTIDE_BINDING	55681	SCYL2	SCY1-like 2 (S. cerevisiae)	1.51395	0.000335582
GO_RIBONUCLEOTIDE_BINDING	5189	PEX1	peroxisomal biogenesis factor 1	1.57736	0.000796385
GO_RIBONUCLEOTIDE_BINDING	2356	FPGS	folylpolyglutamate synthase	1.56811	0.000276656
GO_RIBONUCLEOTIDE_BINDING	134526	ACOT12	acyl-CoA thioesterase 12	1.89251	0.0005775
GO_RIBONUCLEOTIDE_BINDING	10845	CLPX	ClpX caseinolytic peptidase X homolog (E. coli)	3.21089	0.00030944
GO_RIBONUCLEOTIDE_BINDING	2729	GCLC	glutamate-cysteine ligase, catalytic subunit	1.91732	0.0112782
GO_ENZYME_BINDING	3309	HSPA5	heat shock 70kDa protein 5 (glucose-regulated protein, 78kDa)	1.50922	0.0237466
GO_ENZYME_BINDING	1407	CRY1	cryptochrome 1 (photolyase-like)	2.34398	0.00040721
GO_ENZYME_BINDING	590	BCHE	butyrylcholinesterase	1.63658	0.000631726
GO_ENZYME_BINDING	847	CAT	catalase	1.60446	0.00171348
GO_ENZYME_BINDING	972	CD74	CD74 molecule, major histocompatibility complex, class II invariant chain	2.00907	0.00446325
GO_ENZYME_BINDING	55450	CAMK2N1	calcium/calmodulin-dependent protein kinase II inhibitor 1	-1.54105	0.00202792
GO_ENZYME_BINDING	1050	CEBPA	CCAAT/enhancer binding protein (C/EBP), alpha	-1.51687	0.0147935
GO_ENZYME_BINDING	2621	GAS6	growth arrest-specific 6	-2.46472	0.00347183
GO_ENZYME_BINDING	10628	TXNIP	thioredoxin interacting protein	1.88228	0.0465122
GO_ENZYME_BINDING	9776	ATG13	ATG13 autophagy related 13 homolog (S. cerevisiae)	1.51192	0.0269545
GO_ENZYME_BINDING	54941	RNF125	ring finger protein 125	2.61354	0.0039364
GO_ENZYME_BINDING	7277	TUBA4A	tubulin, alpha 4a	1.95742	0.00626406
GO_ENZYME_BINDING	367	AR	androgen receptor	1.50503	0.0208772
GO_ENZYME_BINDING	3162	HMOX1	heme oxygenase (decycling) 1	1.56257	0.0232432
GO_ENZYME_BINDING	5970	RELA	v-rel reticuloendotheliosis viral oncogene homolog A (avian)	1.53339	0.0222273
GO_ENZYME_BINDING	8436	SDPR	serum deprivation response	1.65428	0.028344
GO_ENZYME_BINDING	23329	TBC1D30	TBC1 domain family, member 30	-1.55882	0.0408426
GO_ENZYME_BINDING	1962	EHHADH	enoyl-CoA, hydratase/3-hydroxyacyl CoA dehydrogenase	9.64907	0.000126974
GO_ENZYME_BINDING	8660	IRS2	insulin receptor substrate 2	1.76076	0.0410914
GO_ENZYME_BINDING	440503	PLIN5	perilipin 5	2.38038	7.74295e-05
GO_ENZYME_BINDING	38	ACAT1	acetyl-CoA acetyltransferase 1	1.77339	0.000855305
GO_ENZYME_BINDING	54461	FBXW5	F-box and WD repeat domain containing 5	1.52258	0.0344069
GO_ENZYME_BINDING	5657	PRTN3	proteinase 3	-1.71323	0.000352091
GO_ENZYME_BINDING	1576	CYP3A4	cytochrome P450, family 3, subfamily A, polypeptide 4	2.18741	0.000111938
GO_ENZYME_BINDING	3312	HSPA8	heat shock 70kDa protein 8	1.5283	0.00463497
GO_ENZYME_BINDING	1026	CDKN1A	cyclin-dependent kinase inhibitor 1A (p21, Cip1)	13.8375	1.05919e-05
GO_ENZYME_BINDING	84447	SYVN1	synovial apoptosis inhibitor 1, synoviolin	1.65736	0.00317976
GO_ENZYME_BINDING	1718	DHCR24	24-dehydrocholesterol reductase	-1.58136	0.0182725
GO_ENZYME_BINDING	2779	GNAT1	guanine nucleotide binding protein (G protein), alpha transducing activity polypeptide 1	-1.61589	0.0181812
GO_ENZYME_BINDING	4209	MEF2D	myocyte enhancer factor 2D	1.6649	0.00855838
GO_ENZYME_BINDING	841	CASP8	caspase 8, apoptosis-related cysteine peptidase	1.73114	0.0138296
GO_ENZYME_BINDING	6331	SCN5A	sodium channel, voltage-gated, type V, alpha subunit	-1.53853	0.000335994
GO_ENZYME_BINDING	634	CEACAM1	carcinoembryonic antigen-related cell adhesion molecule 1 (biliary glycoprotein)	1.50125	0.00224974
GO_ENZYME_BINDING	488	ATP2A2	ATPase, Ca++ transporting, cardiac muscle, slow twitch 2	1.91167	0.00039089
GO_ENZYME_BINDING	26256	CABYR	calcium binding tyrosine-(Y)-phosphorylation regulated	-5.21186	0.00557591
GO_ENZYME_BINDING	5507	PPP1R3C	protein phosphatase 1, regulatory subunit 3C	2.33024	0.0220096
GO_ENZYME_BINDING	2944	GSTM1	glutathione S-transferase mu 1	1.53353	0.0245594
GO_ENZYME_BINDING	8863	PER3	period homolog 3 (Drosophila)	-2.01091	0.00111405
GO_ENZYME_BINDING	9961	MVP	major vault protein	-1.61014	0.00449417
GO_ENZYME_BINDING	3965	LGALS9	lectin, galactoside-binding, soluble, 9	1.69696	0.0290004
GO_ENZYME_BINDING	3156	HMGCR	3-hydroxy-3-methylglutaryl-CoA reductase	-1.61115	0.0191748
GO_ENZYME_BINDING	2950	GSTP1	glutathione S-transferase pi 1	1.63912	0.0200483
GO_OXIDOREDUCTASE_ACTIVITY_ACTING_ON_THE_CH_CH_GROUP_OF_DONORS	51	ACOX1	acyl-CoA oxidase 1, palmitoyl	1.66627	0.00242207
GO_OXIDOREDUCTASE_ACTIVITY_ACTING_ON_THE_CH_CH_GROUP_OF_DONORS	34	ACADM	acyl-CoA dehydrogenase, C-4 to C-12 straight chain	1.99474	0.000454357
GO_OXIDOREDUCTASE_ACTIVITY_ACTING_ON_THE_CH_CH_GROUP_OF_DONORS	26063	DECR2	2,4-dienoyl CoA reductase 2, peroxisomal	1.90336	0.004052
GO_OXIDOREDUCTASE_ACTIVITY_ACTING_ON_THE_CH_CH_GROUP_OF_DONORS	1718	DHCR24	24-dehydrocholesterol reductase	-1.58136	0.0182725
GO_OXIDOREDUCTASE_ACTIVITY_ACTING_ON_THE_CH_CH_GROUP_OF_DONORS	54884	RETSAT	retinol saturase (all-trans-retinol 13,14-reductase)	4.89906	9.08576e-05
GO_OXIDOREDUCTASE_ACTIVITY_ACTING_ON_THE_CH_CH_GROUP_OF_DONORS	1666	DECR1	2,4-dienoyl CoA reductase 1, mitochondrial	1.7845	0.000543546
GO_OXIDOREDUCTASE_ACTIVITY_ACTING_ON_THE_CH_CH_GROUP_OF_DONORS	84129	ACAD11	acyl-CoA dehydrogenase family, member 11	1.67146	0.000646651
GO_OXIDOREDUCTASE_ACTIVITY_ACTING_ON_THE_CH_CH_GROUP_OF_DONORS	33	ACADL	acyl-CoA dehydrogenase, long chain	1.72816	0.0028287
GO_OXIDOREDUCTASE_ACTIVITY_ACTING_ON_THE_CH_CH_GROUP_OF_DONORS	6391	SDHC	succinate dehydrogenase complex, subunit C, integral membrane protein, 15kDa	1.62795	0.00613126
GO_OXIDOREDUCTASE_ACTIVITY_ACTING_ON_THE_CH_CH_GROUP_OF_DONORS	1371	CPOX	coproporphyrinogen oxidase	1.91579	0.000180559
GO_ACTIVE_TRANSMEMBRANE_TRANSPORTER_ACTIVITY	246213	SLC17A8	solute carrier family 17 (sodium-dependent inorganic phosphate cotransporter), member 8	3.8658	0.00138831
GO_ACTIVE_TRANSMEMBRANE_TRANSPORTER_ACTIVITY	10568	SLC34A2	solute carrier family 34 (sodium phosphate), member 2	1.79881	0.0178249
GO_ACTIVE_TRANSMEMBRANE_TRANSPORTER_ACTIVITY	488	ATP2A2	ATPase, Ca++ transporting, cardiac muscle, slow twitch 2	1.91167	0.00039089
GO_ACTIVE_TRANSMEMBRANE_TRANSPORTER_ACTIVITY	8714	ABCC3	ATP-binding cassette, sub-family C (CFTR/MRP), member 3	2.14302	0.00354122
GO_ACTIVE_TRANSMEMBRANE_TRANSPORTER_ACTIVITY	225	ABCD2	ATP-binding cassette, sub-family D (ALD), member 2	1.80682	0.0319243
GO_ACTIVE_TRANSMEMBRANE_TRANSPORTER_ACTIVITY	85414	SLC45A3	solute carrier family 45, member 3	1.53003	0.0005615
GO_ACTIVE_TRANSMEMBRANE_TRANSPORTER_ACTIVITY	9121	SLC16A5	solute carrier family 16, member 5 (monocarboxylic acid transporter 6)	1.6354	0.00113775
GO_ACTIVE_TRANSMEMBRANE_TRANSPORTER_ACTIVITY	6584	SLC22A5	solute carrier family 22 (organic cation/carnitine transporter), member 5	2.19767	0.00263368
GO_ACTIVE_TRANSMEMBRANE_TRANSPORTER_ACTIVITY	6566	SLC16A1	solute carrier family 16, member 1 (monocarboxylic acid transporter 1)	2.16833	0.0025293
GO_ACTIVE_TRANSMEMBRANE_TRANSPORTER_ACTIVITY	201232	SLC16A13	solute carrier family 16, member 13 (monocarboxylic acid transporter 13)	1.5352	0.0127123
GO_ACTIVE_TRANSMEMBRANE_TRANSPORTER_ACTIVITY	8671	SLC4A4	solute carrier family 4, sodium bicarbonate cotransporter, member 4	1.54624	0.00500488
GO_ACTIVE_TRANSMEMBRANE_TRANSPORTER_ACTIVITY	9194	SLC16A7	solute carrier family 16, member 7 (monocarboxylic acid transporter 2)	2.01742	0.00544407
GO_ACTIVE_TRANSMEMBRANE_TRANSPORTER_ACTIVITY	8034	SLC25A16	solute carrier family 25 (mitochondrial carrier; Graves disease autoantigen), member 16	1.5307	0.00723438
GO_ACTIVE_TRANSMEMBRANE_TRANSPORTER_ACTIVITY	5244	ABCB4	ATP-binding cassette, sub-family B (MDR/TAP), member 4	1.52019	0.0043556
GO_ACTIVE_TRANSMEMBRANE_TRANSPORTER_ACTIVITY	5825	ABCD3	ATP-binding cassette, sub-family D (ALD), member 3	1.6066	0.00182228
GO_ACTIVE_TRANSMEMBRANE_TRANSPORTER_ACTIVITY	9429	ABCG2	ATP-binding cassette, sub-family G (WHITE), member 2	1.80371	0.00152641
GO_ACTIVE_TRANSMEMBRANE_TRANSPORTER_ACTIVITY	64849	SLC13A3	solute carrier family 13 (sodium-dependent dicarboxylate transporter), member 3	-2.01077	0.0410159
GO_ACTIVE_TRANSMEMBRANE_TRANSPORTER_ACTIVITY	284111	SLC13A5	solute carrier family 13 (sodium-dependent citrate transporter), member 5	-4.03895	0.0187846
GO_ACTIVE_TRANSMEMBRANE_TRANSPORTER_ACTIVITY	206358	SLC36A1	solute carrier family 36 (proton/amino acid symporter), member 1	-1.51107	0.000874713
GO_ORGANIC_ACID_TRANSMEMBRANE_TRANSPORTER_ACTIVITY	8714	ABCC3	ATP-binding cassette, sub-family C (CFTR/MRP), member 3	2.14302	0.00354122
GO_ORGANIC_ACID_TRANSMEMBRANE_TRANSPORTER_ACTIVITY	246213	SLC17A8	solute carrier family 17 (sodium-dependent inorganic phosphate cotransporter), member 8	3.8658	0.00138831
GO_ORGANIC_ACID_TRANSMEMBRANE_TRANSPORTER_ACTIVITY	634	CEACAM1	carcinoembryonic antigen-related cell adhesion molecule 1 (biliary glycoprotein)	1.50125	0.00224974
GO_ORGANIC_ACID_TRANSMEMBRANE_TRANSPORTER_ACTIVITY	9121	SLC16A5	solute carrier family 16, member 5 (monocarboxylic acid transporter 6)	1.6354	0.00113775
GO_ORGANIC_ACID_TRANSMEMBRANE_TRANSPORTER_ACTIVITY	6584	SLC22A5	solute carrier family 22 (organic cation/carnitine transporter), member 5	2.19767	0.00263368
GO_ORGANIC_ACID_TRANSMEMBRANE_TRANSPORTER_ACTIVITY	201232	SLC16A13	solute carrier family 16, member 13 (monocarboxylic acid transporter 13)	1.5352	0.0127123
GO_ORGANIC_ACID_TRANSMEMBRANE_TRANSPORTER_ACTIVITY	6566	SLC16A1	solute carrier family 16, member 1 (monocarboxylic acid transporter 1)	2.16833	0.0025293
GO_ORGANIC_ACID_TRANSMEMBRANE_TRANSPORTER_ACTIVITY	347735	SERINC2	serine incorporator 2	1.50214	0.0111738
GO_ORGANIC_ACID_TRANSMEMBRANE_TRANSPORTER_ACTIVITY	9194	SLC16A7	solute carrier family 16, member 7 (monocarboxylic acid transporter 2)	2.01742	0.00544407
GO_ORGANIC_ACID_TRANSMEMBRANE_TRANSPORTER_ACTIVITY	10955	SERINC3	serine incorporator 3	1.76767	0.0036202
GO_ORGANIC_ACID_TRANSMEMBRANE_TRANSPORTER_ACTIVITY	64849	SLC13A3	solute carrier family 13 (sodium-dependent dicarboxylate transporter), member 3	-2.01077	0.0410159
GO_ORGANIC_ACID_TRANSMEMBRANE_TRANSPORTER_ACTIVITY	206358	SLC36A1	solute carrier family 36 (proton/amino acid symporter), member 1	-1.51107	0.000874713
GO_ORGANIC_ACID_TRANSMEMBRANE_TRANSPORTER_ACTIVITY	284111	SLC13A5	solute carrier family 13 (sodium-dependent citrate transporter), member 5	-4.03895	0.0187846
GO_HYDROLASE_ACTIVITY_ACTING_ON_ESTER_BONDS	10965	ACOT2	acyl-CoA thioesterase 2	4.63269	0.0062207
GO_HYDROLASE_ACTIVITY_ACTING_ON_ESTER_BONDS	283	ANG	angiogenin, ribonuclease, RNase A family, 5	-2.27736	0.0190897
GO_HYDROLASE_ACTIVITY_ACTING_ON_ESTER_BONDS	5507	PPP1R3C	protein phosphatase 1, regulatory subunit 3C	2.33024	0.0220096
GO_HYDROLASE_ACTIVITY_ACTING_ON_ESTER_BONDS	9317	PTER	phosphotriesterase related	-1.7866	0.00138071
GO_HYDROLASE_ACTIVITY_ACTING_ON_ESTER_BONDS	283927	NUDT7	nudix (nucleoside diphosphate linked moiety X)-type motif 7	-2.17292	0.0458252
GO_HYDROLASE_ACTIVITY_ACTING_ON_ESTER_BONDS	25953	PNKD	paroxysmal nonkinesigenic dyskinesia	1.52536	0.00310289
GO_HYDROLASE_ACTIVITY_ACTING_ON_ESTER_BONDS	134526	ACOT12	acyl-CoA thioesterase 12	1.89251	0.0005775
GO_HYDROLASE_ACTIVITY_ACTING_ON_ESTER_BONDS	6038	RNASE4	ribonuclease, RNase A family, 4	-2.27736	0.0190897
GO_HYDROLASE_ACTIVITY_ACTING_ON_ESTER_BONDS	64943	NT5DC2	5'-nucleotidase domain containing 2	2.05203	0.00125945
GO_HYDROLASE_ACTIVITY_ACTING_ON_ESTER_BONDS	5444	PON1	paraoxonase 1	1.51404	0.00152714
GO_HYDROLASE_ACTIVITY_ACTING_ON_ESTER_BONDS	10247	HRSP12	heat-responsive protein 12	1.55689	0.00155555
GO_HYDROLASE_ACTIVITY_ACTING_ON_ESTER_BONDS	57406	ABHD6	abhydrolase domain containing 6	2.36925	0.00436045
GO_HYDROLASE_ACTIVITY_ACTING_ON_ESTER_BONDS	761	CA3	carbonic anhydrase III, muscle specific	2.60538	0.00219411
GO_HYDROLASE_ACTIVITY_ACTING_ON_ESTER_BONDS	58511	DNASE2B	deoxyribonuclease II beta	1.55098	0.00041792
GO_HYDROLASE_ACTIVITY_ACTING_ON_ESTER_BONDS	590	BCHE	butyrylcholinesterase	1.63658	0.000631726
GO_HYDROLASE_ACTIVITY_ACTING_ON_ESTER_BONDS	11343	MGLL	monoglyceride lipase	1.86235	0.00245045
GO_HYDROLASE_ACTIVITY_ACTING_ON_ESTER_BONDS	1119	CHKA	choline kinase alpha	2.68308	0.00340228
GO_HYDROLASE_ACTIVITY_ACTING_ON_ESTER_BONDS	3162	HMOX1	heme oxygenase (decycling) 1	1.56257	0.0232432
GO_HYDROLASE_ACTIVITY_ACTING_ON_ESTER_BONDS	641371	ACOT1	acyl-CoA thioesterase 1	9.21084	0.000784115
GO_HYDROLASE_ACTIVITY_ACTING_ON_ESTER_BONDS	57104	PNPLA2	patatin-like phospholipase domain containing 2	1.81129	0.022903
GO_HYDROLASE_ACTIVITY_ACTING_ON_ESTER_BONDS	5787	PTPRB	protein tyrosine phosphatase, receptor type, B	1.50214	0.00367442
GO_HYDROLASE_ACTIVITY_ACTING_ON_ESTER_BONDS	122970	ACOT4	acyl-CoA thioesterase 4	3.38432	0.00368984
GO_HYDROLASE_ACTIVITY_ACTING_ON_ESTER_BONDS	3931	LCAT	lecithin-cholesterol acyltransferase	1.64584	0.0152627
GO_HYDROLASE_ACTIVITY_ACTING_ON_ESTER_BONDS	3988	LIPA	lipase A, lysosomal acid, cholesterol esterase	1.61684	0.00596293
GO_HYDROLASE_ACTIVITY_ACTING_ON_ESTER_BONDS	2053	EPHX2	epoxide hydrolase 2, cytoplasmic	2.12978	0.000393204
GO_HYDROLASE_ACTIVITY_ACTING_ON_ESTER_BONDS	4329	ALDH6A1	aldehyde dehydrogenase 6 family, member A1	1.55718	0.0130025
GO_TRANSFERASE_ACTIVITY_TRANSFERRING_ACYL_GROUPS	25797	QPCT	glutaminyl-peptide cyclotransferase	1.55183	0.000262202
GO_TRANSFERASE_ACTIVITY_TRANSFERRING_ACYL_GROUPS	3158	HMGCS2	3-hydroxy-3-methylglutaryl-CoA synthase 2 (mitochondrial)	1.69489	0.00079222
GO_TRANSFERASE_ACTIVITY_TRANSFERRING_ACYL_GROUPS	10555	AGPAT2	1-acylglycerol-3-phosphate O-acyltransferase 2 (lysophosphatidic acid acyltransferase, beta)	1.89944	0.00515849
GO_TRANSFERASE_ACTIVITY_TRANSFERRING_ACYL_GROUPS	54677	CROT	carnitine O-octanoyltransferase	1.87563	0.000840794
GO_TRANSFERASE_ACTIVITY_TRANSFERRING_ACYL_GROUPS	1384	CRAT	carnitine O-acetyltransferase	2.85378	0.00285356
GO_TRANSFERASE_ACTIVITY_TRANSFERRING_ACYL_GROUPS	7051	TGM1	transglutaminase 1 (K polypeptide epidermal type I, protein-glutamine-gamma-glutamyltransferase)	-2.30101	0.021523
GO_TRANSFERASE_ACTIVITY_TRANSFERRING_ACYL_GROUPS	1375	CPT1B	carnitine palmitoyltransferase 1B (muscle)	1.50418	0.0301416
GO_TRANSFERASE_ACTIVITY_TRANSFERRING_ACYL_GROUPS	60481	ELOVL5	ELOVL fatty acid elongase 5	2.31279	0.00910325
GO_TRANSFERASE_ACTIVITY_TRANSFERRING_ACYL_GROUPS	3032	HADHB	hydroxyacyl-CoA dehydrogenase/3-ketoacyl-CoA thiolase/enoyl-CoA hydratase (trifunctional protein), beta subunit	1.92885	0.000229025
GO_TRANSFERASE_ACTIVITY_TRANSFERRING_ACYL_GROUPS	83401	ELOVL3	ELOVL fatty acid elongase 3	6.40236	0.00054127
GO_TRANSFERASE_ACTIVITY_TRANSFERRING_ACYL_GROUPS	9575	CLOCK	clock homolog (mouse)	1.77624	0.000602631
GO_TRANSFERASE_ACTIVITY_TRANSFERRING_ACYL_GROUPS	3030	HADHA	hydroxyacyl-CoA dehydrogenase/3-ketoacyl-CoA thiolase/enoyl-CoA hydratase (trifunctional protein), alpha subunit	1.54394	0.000306471
GO_TRANSFERASE_ACTIVITY_TRANSFERRING_ACYL_GROUPS	3931	LCAT	lecithin-cholesterol acyltransferase	1.64584	0.0152627
GO_TRANSFERASE_ACTIVITY_TRANSFERRING_ACYL_GROUPS	1376	CPT2	carnitine palmitoyltransferase 2	2.1735	0.00144014
GO_TRANSFERASE_ACTIVITY_TRANSFERRING_ACYL_GROUPS	38	ACAT1	acetyl-CoA acetyltransferase 1	1.77339	0.000855305
GO_TRANSFERASE_ACTIVITY_TRANSFERRING_ACYL_GROUPS	57104	PNPLA2	patatin-like phospholipase domain containing 2	1.81129	0.022903
GO_TRANSITION_METAL_ION_BINDING	64135	IFIH1	interferon induced with helicase C domain 1	-1.52858	0.0394221
GO_TRANSITION_METAL_ION_BINDING	392636	AGMO	alkylglycerol monooxygenase	1.78901	0.00121152
GO_TRANSITION_METAL_ION_BINDING	635	BHMT	betaine--homocysteine S-methyltransferase	1.70162	0.0343933
GO_TRANSITION_METAL_ION_BINDING	9572	NR1D1	nuclear receptor subfamily 1, group D, member 1	-2.71243	0.00139493
GO_TRANSITION_METAL_ION_BINDING	761	CA3	carbonic anhydrase III, muscle specific	2.60538	0.00219411
GO_TRANSITION_METAL_ION_BINDING	1580	CYP4B1	cytochrome P450, family 4, subfamily B, polypeptide 1	1.52747	0.0026546
GO_TRANSITION_METAL_ION_BINDING	51302	CYP39A1	cytochrome P450, family 39, subfamily A, polypeptide 1	2.42464	0.00251403
GO_TRANSITION_METAL_ION_BINDING	2157	F8	coagulation factor VIII, procoagulant component	1.54088	0.0141895
GO_TRANSITION_METAL_ION_BINDING	9975	NR1D2	nuclear receptor subfamily 1, group D, member 2	-2.09736	0.00235741
GO_TRANSITION_METAL_ION_BINDING	4311	MME	membrane metallo-endopeptidase	3.49531	0.000484026
GO_TRANSITION_METAL_ION_BINDING	1576	CYP3A4	cytochrome P450, family 3, subfamily A, polypeptide 4	2.18741	0.000111938
GO_TRANSITION_METAL_ION_BINDING	8424	BBOX1	butyrobetaine (gamma), 2-oxoglutarate dioxygenase (gamma-butyrobetaine hydroxylase) 1	1.59043	0.00889699
GO_TRANSITION_METAL_ION_BINDING	84447	SYVN1	synovial apoptosis inhibitor 1, synoviolin	1.65736	0.00317976
GO_TRANSITION_METAL_ION_BINDING	79836	LONRF3	LON peptidase N-terminal domain and ring finger 3	1.69692	0.00260121
GO_TRANSITION_METAL_ION_BINDING	367	AR	androgen receptor	1.50503	0.0208772
GO_TRANSITION_METAL_ION_BINDING	54941	RNF125	ring finger protein 125	2.61354	0.0039364
GO_TRANSITION_METAL_ION_BINDING	79872	CBLL1	Cas-Br-M (murine) ecotropic retroviral transforming sequence-like 1	1.64438	0.00995289
GO_TRANSITION_METAL_ION_BINDING	9997	SCO2	SCO cytochrome oxidase deficient homolog 2 (yeast)	2.07655	0.0062045
GO_TRANSITION_METAL_ION_BINDING	1582	CYP8B1	cytochrome P450, family 8, subfamily B, polypeptide 1	3.55399	0.00785468
GO_TRANSITION_METAL_ION_BINDING	283	ANG	angiogenin, ribonuclease, RNase A family, 5	-2.27736	0.0190897
GO_TRANSITION_METAL_ION_BINDING	25797	QPCT	glutaminyl-peptide cyclotransferase	1.55183	0.000262202
GO_TRANSITION_METAL_ION_BINDING	2590	GALNT2	UDP-N-acetyl-alpha-D-galactosamine:polypeptide N-acetylgalactosaminyltransferase 2 (GalNAc-T2)	1.58888	0.00242936
GO_TRANSITION_METAL_ION_BINDING	10483	SEC23B	Sec23 homolog B (S. cerevisiae)	1.62665	0.0425813
GO_TRANSITION_METAL_ION_BINDING	3422	IDI1	isopentenyl-diphosphate delta isomerase 1	-3.14131	0.000814091
GO_TRANSITION_METAL_ION_BINDING	1397	CRIP2	cysteine-rich protein 2	1.55442	0.00999808
GO_TRANSITION_METAL_ION_BINDING	9317	PTER	phosphotriesterase related	-1.7866	0.00138071
GO_TRANSITION_METAL_ION_BINDING	4199	ME1	malic enzyme 1, NADP(+)-dependent, cytosolic	1.98158	0.0424975
GO_TRANSITION_METAL_ION_BINDING	90637	ZFAND2A	zinc finger, AN1-type domain 2A	1.51676	0.00177595
GO_TRANSITION_METAL_ION_BINDING	22885	ABLIM3	actin binding LIM protein family, member 3	1.78484	0.000402864
GO_TRANSITION_METAL_ION_BINDING	6821	SUOX	sulfite oxidase	1.57706	0.00517778
GO_TRANSITION_METAL_ION_BINDING	8856	NR1I2	nuclear receptor subfamily 1, group I, member 2	1.57155	0.00343849
GO_TRANSITION_METAL_ION_BINDING	10247	HRSP12	heat-responsive protein 12	1.55689	0.00155555
GO_TRANSITION_METAL_ION_BINDING	283927	NUDT7	nudix (nucleoside diphosphate linked moiety X)-type motif 7	-2.17292	0.0458252
GO_TRANSITION_METAL_ION_BINDING	222484	LNX2	ligand of numb-protein X 2	1.58928	0.00121823
GO_TRANSITION_METAL_ION_BINDING	1595	CYP51A1	cytochrome P450, family 51, subfamily A, polypeptide 1	-2.46406	0.00328032
GO_TRANSITION_METAL_ION_BINDING	1807	DPYS	dihydropyrimidinase	1.53281	0.00564242
GO_ORGANIC_ANION_TRANSMEMBRANE_TRANSPORTER_ACTIVITY	64849	SLC13A3	solute carrier family 13 (sodium-dependent dicarboxylate transporter), member 3	-2.01077	0.0410159
GO_ORGANIC_ANION_TRANSMEMBRANE_TRANSPORTER_ACTIVITY	284111	SLC13A5	solute carrier family 13 (sodium-dependent citrate transporter), member 5	-4.03895	0.0187846
GO_ORGANIC_ANION_TRANSMEMBRANE_TRANSPORTER_ACTIVITY	206358	SLC36A1	solute carrier family 36 (proton/amino acid symporter), member 1	-1.51107	0.000874713
GO_ORGANIC_ANION_TRANSMEMBRANE_TRANSPORTER_ACTIVITY	9194	SLC16A7	solute carrier family 16, member 7 (monocarboxylic acid transporter 2)	2.01742	0.00544407
GO_ORGANIC_ANION_TRANSMEMBRANE_TRANSPORTER_ACTIVITY	347735	SERINC2	serine incorporator 2	1.50214	0.0111738
GO_ORGANIC_ANION_TRANSMEMBRANE_TRANSPORTER_ACTIVITY	10955	SERINC3	serine incorporator 3	1.76767	0.0036202
GO_ORGANIC_ANION_TRANSMEMBRANE_TRANSPORTER_ACTIVITY	6566	SLC16A1	solute carrier family 16, member 1 (monocarboxylic acid transporter 1)	2.16833	0.0025293
GO_ORGANIC_ANION_TRANSMEMBRANE_TRANSPORTER_ACTIVITY	8671	SLC4A4	solute carrier family 4, sodium bicarbonate cotransporter, member 4	1.54624	0.00500488
GO_ORGANIC_ANION_TRANSMEMBRANE_TRANSPORTER_ACTIVITY	201232	SLC16A13	solute carrier family 16, member 13 (monocarboxylic acid transporter 13)	1.5352	0.0127123
GO_ORGANIC_ANION_TRANSMEMBRANE_TRANSPORTER_ACTIVITY	246213	SLC17A8	solute carrier family 17 (sodium-dependent inorganic phosphate cotransporter), member 8	3.8658	0.00138831
GO_ORGANIC_ANION_TRANSMEMBRANE_TRANSPORTER_ACTIVITY	634	CEACAM1	carcinoembryonic antigen-related cell adhesion molecule 1 (biliary glycoprotein)	1.50125	0.00224974
GO_ORGANIC_ANION_TRANSMEMBRANE_TRANSPORTER_ACTIVITY	8714	ABCC3	ATP-binding cassette, sub-family C (CFTR/MRP), member 3	2.14302	0.00354122
GO_ORGANIC_ANION_TRANSMEMBRANE_TRANSPORTER_ACTIVITY	9121	SLC16A5	solute carrier family 16, member 5 (monocarboxylic acid transporter 6)	1.6354	0.00113775
GO_ORGANIC_ANION_TRANSMEMBRANE_TRANSPORTER_ACTIVITY	6584	SLC22A5	solute carrier family 22 (organic cation/carnitine transporter), member 5	2.19767	0.00263368
GO_FLAVIN_ADENINE_DINUCLEOTIDE_BINDING	34	ACADM	acyl-CoA dehydrogenase, C-4 to C-12 straight chain	1.99474	0.000454357
GO_FLAVIN_ADENINE_DINUCLEOTIDE_BINDING	6713	SQLE	squalene epoxidase	-2.98702	0.00195107
GO_FLAVIN_ADENINE_DINUCLEOTIDE_BINDING	51	ACOX1	acyl-CoA oxidase 1, palmitoyl	1.66627	0.00242207
GO_FLAVIN_ADENINE_DINUCLEOTIDE_BINDING	1718	DHCR24	24-dehydrocholesterol reductase	-1.58136	0.0182725
GO_FLAVIN_ADENINE_DINUCLEOTIDE_BINDING	4129	MAOB	monoamine oxidase B	1.63753	0.00256494
GO_FLAVIN_ADENINE_DINUCLEOTIDE_BINDING	4524	MTHFR	methylenetetrahydrofolate reductase (NAD(P)H)	1.66844	0.0183477
GO_FLAVIN_ADENINE_DINUCLEOTIDE_BINDING	84129	ACAD11	acyl-CoA dehydrogenase family, member 11	1.67146	0.000646651
GO_FLAVIN_ADENINE_DINUCLEOTIDE_BINDING	33	ACADL	acyl-CoA dehydrogenase, long chain	1.72816	0.0028287
GO_FLAVIN_ADENINE_DINUCLEOTIDE_BINDING	2326	FMO1	flavin containing monooxygenase 1	1.84427	0.000408961
GO_FLAVIN_ADENINE_DINUCLEOTIDE_BINDING	2110	ETFDH	electron-transferring-flavoprotein dehydrogenase	1.79156	0.00020707
GO_TRANSPORTER_ACTIVITY	788	SLC25A20	solute carrier family 25 (carnitine/acylcarnitine translocase), member 20	2.22906	8.36687e-05
GO_TRANSPORTER_ACTIVITY	9429	ABCG2	ATP-binding cassette, sub-family G (WHITE), member 2	1.80371	0.00152641
GO_TRANSPORTER_ACTIVITY	10955	SERINC3	serine incorporator 3	1.76767	0.0036202
GO_TRANSPORTER_ACTIVITY	5244	ABCB4	ATP-binding cassette, sub-family B (MDR/TAP), member 4	1.52019	0.0043556
GO_TRANSPORTER_ACTIVITY	5825	ABCD3	ATP-binding cassette, sub-family D (ALD), member 3	1.6066	0.00182228
GO_TRANSPORTER_ACTIVITY	2171	FABP5	fatty acid binding protein 5 (psoriasis-associated)	-1.73529	0.00148123
GO_TRANSPORTER_ACTIVITY	441168	FAM26F	family with sequence similarity 26, member F	-1.57913	0.0210457
GO_TRANSPORTER_ACTIVITY	284904	SEC14L4	SEC14-like 4 (S. cerevisiae)	1.52196	0.00611279
GO_TRANSPORTER_ACTIVITY	347735	SERINC2	serine incorporator 2	1.50214	0.0111738
GO_TRANSPORTER_ACTIVITY	2621	GAS6	growth arrest-specific 6	-2.46472	0.00347183
GO_TRANSPORTER_ACTIVITY	8034	SLC25A16	solute carrier family 25 (mitochondrial carrier; Graves disease autoantigen), member 16	1.5307	0.00723438
GO_TRANSPORTER_ACTIVITY	9194	SLC16A7	solute carrier family 16, member 7 (monocarboxylic acid transporter 2)	2.01742	0.00544407
GO_TRANSPORTER_ACTIVITY	55532	SLC30A10	solute carrier family 30, member 10	2.40434	0.0303675
GO_TRANSPORTER_ACTIVITY	23250	ATP11A	ATPase, class VI, type 11A	-2.86629	0.0111107
GO_TRANSPORTER_ACTIVITY	206358	SLC36A1	solute carrier family 36 (proton/amino acid symporter), member 1	-1.51107	0.000874713
GO_TRANSPORTER_ACTIVITY	4547	MTTP	microsomal triglyceride transfer protein	1.58083	0.000395105
GO_TRANSPORTER_ACTIVITY	284111	SLC13A5	solute carrier family 13 (sodium-dependent citrate transporter), member 5	-4.03895	0.0187846
GO_TRANSPORTER_ACTIVITY	58488	PCTP	phosphatidylcholine transfer protein	3.99036	0.0164868
GO_TRANSPORTER_ACTIVITY	64849	SLC13A3	solute carrier family 13 (sodium-dependent dicarboxylate transporter), member 3	-2.01077	0.0410159
GO_TRANSPORTER_ACTIVITY	6331	SCN5A	sodium channel, voltage-gated, type V, alpha subunit	-1.53853	0.000335994
GO_TRANSPORTER_ACTIVITY	6584	SLC22A5	solute carrier family 22 (organic cation/carnitine transporter), member 5	2.19767	0.00263368
GO_TRANSPORTER_ACTIVITY	9121	SLC16A5	solute carrier family 16, member 5 (monocarboxylic acid transporter 6)	1.6354	0.00113775
GO_TRANSPORTER_ACTIVITY	85414	SLC45A3	solute carrier family 45, member 3	1.53003	0.0005615
GO_TRANSPORTER_ACTIVITY	225	ABCD2	ATP-binding cassette, sub-family D (ALD), member 2	1.80682	0.0319243
GO_TRANSPORTER_ACTIVITY	8714	ABCC3	ATP-binding cassette, sub-family C (CFTR/MRP), member 3	2.14302	0.00354122
GO_TRANSPORTER_ACTIVITY	488	ATP2A2	ATPase, Ca++ transporting, cardiac muscle, slow twitch 2	1.91167	0.00039089
GO_TRANSPORTER_ACTIVITY	10568	SLC34A2	solute carrier family 34 (sodium phosphate), member 2	1.79881	0.0178249
GO_TRANSPORTER_ACTIVITY	634	CEACAM1	carcinoembryonic antigen-related cell adhesion molecule 1 (biliary glycoprotein)	1.50125	0.00224974
GO_TRANSPORTER_ACTIVITY	246213	SLC17A8	solute carrier family 17 (sodium-dependent inorganic phosphate cotransporter), member 8	3.8658	0.00138831
GO_TRANSPORTER_ACTIVITY	201232	SLC16A13	solute carrier family 16, member 13 (monocarboxylic acid transporter 13)	1.5352	0.0127123
GO_TRANSPORTER_ACTIVITY	8671	SLC4A4	solute carrier family 4, sodium bicarbonate cotransporter, member 4	1.54624	0.00500488
GO_TRANSPORTER_ACTIVITY	6566	SLC16A1	solute carrier family 16, member 1 (monocarboxylic acid transporter 1)	2.16833	0.0025293
GO_TRANSPORTER_ACTIVITY	1135	CHRNA2	cholinergic receptor, nicotinic, alpha 2 (neuronal)	3.05296	0.0083854
GO_CARBOXYLIC_ESTER_HYDROLASE_ACTIVITY	10965	ACOT2	acyl-CoA thioesterase 2	4.63269	0.0062207
GO_CARBOXYLIC_ESTER_HYDROLASE_ACTIVITY	5444	PON1	paraoxonase 1	1.51404	0.00152714
GO_CARBOXYLIC_ESTER_HYDROLASE_ACTIVITY	57406	ABHD6	abhydrolase domain containing 6	2.36925	0.00436045
GO_CARBOXYLIC_ESTER_HYDROLASE_ACTIVITY	134526	ACOT12	acyl-CoA thioesterase 12	1.89251	0.0005775
GO_CARBOXYLIC_ESTER_HYDROLASE_ACTIVITY	11343	MGLL	monoglyceride lipase	1.86235	0.00245045
GO_CARBOXYLIC_ESTER_HYDROLASE_ACTIVITY	590	BCHE	butyrylcholinesterase	1.63658	0.000631726
GO_CARBOXYLIC_ESTER_HYDROLASE_ACTIVITY	122970	ACOT4	acyl-CoA thioesterase 4	3.38432	0.00368984
GO_CARBOXYLIC_ESTER_HYDROLASE_ACTIVITY	3988	LIPA	lipase A, lysosomal acid, cholesterol esterase	1.61684	0.00596293
GO_CARBOXYLIC_ESTER_HYDROLASE_ACTIVITY	3931	LCAT	lecithin-cholesterol acyltransferase	1.64584	0.0152627
GO_CARBOXYLIC_ESTER_HYDROLASE_ACTIVITY	1119	CHKA	choline kinase alpha	2.68308	0.00340228
GO_CARBOXYLIC_ESTER_HYDROLASE_ACTIVITY	57104	PNPLA2	patatin-like phospholipase domain containing 2	1.81129	0.022903
GO_CARBOXYLIC_ESTER_HYDROLASE_ACTIVITY	641371	ACOT1	acyl-CoA thioesterase 1	9.21084	0.000784115
GO_ADENYL_NUCLEOTIDE_BINDING	9531	BAG3	BCL2-associated athanogene 3	2.06947	0.00170749
GO_ADENYL_NUCLEOTIDE_BINDING	6584	SLC22A5	solute carrier family 22 (organic cation/carnitine transporter), member 5	2.19767	0.00263368
GO_ADENYL_NUCLEOTIDE_BINDING	80216	ALPK1	alpha-kinase 1	-2.57373	0.00510243
GO_ADENYL_NUCLEOTIDE_BINDING	4199	ME1	malic enzyme 1, NADP(+)-dependent, cytosolic	1.98158	0.0424975
GO_ADENYL_NUCLEOTIDE_BINDING	225	ABCD2	ATP-binding cassette, sub-family D (ALD), member 2	1.80682	0.0319243
GO_ADENYL_NUCLEOTIDE_BINDING	283459	GATC	glutamyl-tRNA(Gln) amidotransferase, subunit C homolog (bacterial)	1.57923	0.00814744
GO_ADENYL_NUCLEOTIDE_BINDING	8714	ABCC3	ATP-binding cassette, sub-family C (CFTR/MRP), member 3	2.14302	0.00354122
GO_ADENYL_NUCLEOTIDE_BINDING	10110	SGK2	serum/glucocorticoid regulated kinase 2	1.54821	0.0439451
GO_ADENYL_NUCLEOTIDE_BINDING	488	ATP2A2	ATPase, Ca++ transporting, cardiac muscle, slow twitch 2	1.91167	0.00039089
GO_ADENYL_NUCLEOTIDE_BINDING	134266	GRPEL2	GrpE-like 2, mitochondrial (E. coli)	1.52803	0.00612424
GO_ADENYL_NUCLEOTIDE_BINDING	55681	SCYL2	SCY1-like 2 (S. cerevisiae)	1.51395	0.000335582
GO_ADENYL_NUCLEOTIDE_BINDING	5189	PEX1	peroxisomal biogenesis factor 1	1.57736	0.000796385
GO_ADENYL_NUCLEOTIDE_BINDING	2356	FPGS	folylpolyglutamate synthase	1.56811	0.000276656
GO_ADENYL_NUCLEOTIDE_BINDING	134526	ACOT12	acyl-CoA thioesterase 12	1.89251	0.0005775
GO_ADENYL_NUCLEOTIDE_BINDING	56897	WRNIP1	Werner helicase interacting protein 1	1.51547	0.00512994
GO_ADENYL_NUCLEOTIDE_BINDING	53354	PANK1	pantothenate kinase 1	1.50012	0.00261402
GO_ADENYL_NUCLEOTIDE_BINDING	10808	HSPH1	heat shock 105kDa/110kDa protein 1	1.90561	0.000897429
GO_ADENYL_NUCLEOTIDE_BINDING	2729	GCLC	glutamate-cysteine ligase, catalytic subunit	1.91732	0.0112782
GO_ADENYL_NUCLEOTIDE_BINDING	10845	CLPX	ClpX caseinolytic peptidase X homolog (E. coli)	3.21089	0.00030944
GO_ADENYL_NUCLEOTIDE_BINDING	9429	ABCG2	ATP-binding cassette, sub-family G (WHITE), member 2	1.80371	0.00152641
GO_ADENYL_NUCLEOTIDE_BINDING	3309	HSPA5	heat shock 70kDa protein 5 (glucose-regulated protein, 78kDa)	1.50922	0.0237466
GO_ADENYL_NUCLEOTIDE_BINDING	5244	ABCB4	ATP-binding cassette, sub-family B (MDR/TAP), member 4	1.52019	0.0043556
GO_ADENYL_NUCLEOTIDE_BINDING	5825	ABCD3	ATP-binding cassette, sub-family D (ALD), member 3	1.6066	0.00182228
GO_ADENYL_NUCLEOTIDE_BINDING	4627	MYH9	myosin, heavy chain 9, non-muscle	-1.50693	0.000996246
GO_ADENYL_NUCLEOTIDE_BINDING	2984	GUCY2C	guanylate cyclase 2C (heat stable enterotoxin receptor)	-1.67592	0.0313742
GO_ADENYL_NUCLEOTIDE_BINDING	6296	ACSM3	acyl-CoA synthetase medium-chain family member 3	1.55279	0.0151525
GO_ADENYL_NUCLEOTIDE_BINDING	64135	IFIH1	interferon induced with helicase C domain 1	-1.52858	0.0394221
GO_ADENYL_NUCLEOTIDE_BINDING	5166	PDK4	pyruvate dehydrogenase kinase, isozyme 4	4.66084	0.00209195
GO_ADENYL_NUCLEOTIDE_BINDING	79611	ACSS3	acyl-CoA synthetase short-chain family member 3	2.04006	0.0150236
GO_ADENYL_NUCLEOTIDE_BINDING	51703	ACSL5	acyl-CoA synthetase long-chain family member 5	1.6176	0.000648662
GO_ADENYL_NUCLEOTIDE_BINDING	23250	ATP11A	ATPase, class VI, type 11A	-2.86629	0.0111107
GO_ADENYL_NUCLEOTIDE_BINDING	2180	ACSL1	acyl-CoA synthetase long-chain family member 1	3.24665	0.00047773
GO_ADENYL_NUCLEOTIDE_BINDING	1119	CHKA	choline kinase alpha	2.68308	0.00340228
GO_ADENYL_NUCLEOTIDE_BINDING	3312	HSPA8	heat shock 70kDa protein 8	1.5283	0.00463497
GO_ADENYL_NUCLEOTIDE_BINDING	2710	GK	glycerol kinase	1.6816	0.0019605
GO_ADENYL_NUCLEOTIDE_BINDING	30845	EHD3	EH-domain containing 3	1.69905	0.00697414
GO_SYMPORTER_ACTIVITY	284111	SLC13A5	solute carrier family 13 (sodium-dependent citrate transporter), member 5	-4.03895	0.0187846
GO_SYMPORTER_ACTIVITY	206358	SLC36A1	solute carrier family 36 (proton/amino acid symporter), member 1	-1.51107	0.000874713
GO_SYMPORTER_ACTIVITY	64849	SLC13A3	solute carrier family 13 (sodium-dependent dicarboxylate transporter), member 3	-2.01077	0.0410159
GO_SYMPORTER_ACTIVITY	9194	SLC16A7	solute carrier family 16, member 7 (monocarboxylic acid transporter 2)	2.01742	0.00544407
GO_SYMPORTER_ACTIVITY	201232	SLC16A13	solute carrier family 16, member 13 (monocarboxylic acid transporter 13)	1.5352	0.0127123
GO_SYMPORTER_ACTIVITY	8671	SLC4A4	solute carrier family 4, sodium bicarbonate cotransporter, member 4	1.54624	0.00500488
GO_SYMPORTER_ACTIVITY	6566	SLC16A1	solute carrier family 16, member 1 (monocarboxylic acid transporter 1)	2.16833	0.0025293
GO_SYMPORTER_ACTIVITY	9121	SLC16A5	solute carrier family 16, member 5 (monocarboxylic acid transporter 6)	1.6354	0.00113775
GO_SYMPORTER_ACTIVITY	6584	SLC22A5	solute carrier family 22 (organic cation/carnitine transporter), member 5	2.19767	0.00263368
GO_SYMPORTER_ACTIVITY	10568	SLC34A2	solute carrier family 34 (sodium phosphate), member 2	1.79881	0.0178249
GO_SYMPORTER_ACTIVITY	246213	SLC17A8	solute carrier family 17 (sodium-dependent inorganic phosphate cotransporter), member 8	3.8658	0.00138831
GO_SYMPORTER_ACTIVITY	85414	SLC45A3	solute carrier family 45, member 3	1.53003	0.0005615
GO_ELECTRON_CARRIER_ACTIVITY	4199	ME1	malic enzyme 1, NADP(+)-dependent, cytosolic	1.98158	0.0424975
GO_ELECTRON_CARRIER_ACTIVITY	34	ACADM	acyl-CoA dehydrogenase, C-4 to C-12 straight chain	1.99474	0.000454357
GO_ELECTRON_CARRIER_ACTIVITY	51	ACOX1	acyl-CoA oxidase 1, palmitoyl	1.66627	0.00242207
GO_ELECTRON_CARRIER_ACTIVITY	6391	SDHC	succinate dehydrogenase complex, subunit C, integral membrane protein, 15kDa	1.62795	0.00613126
GO_ELECTRON_CARRIER_ACTIVITY	33	ACADL	acyl-CoA dehydrogenase, long chain	1.72816	0.0028287
GO_ELECTRON_CARRIER_ACTIVITY	84129	ACAD11	acyl-CoA dehydrogenase family, member 11	1.67146	0.000646651
GO_ELECTRON_CARRIER_ACTIVITY	2731	GLDC	glycine dehydrogenase (decarboxylating)	2.24637	0.000863899
GO_ELECTRON_CARRIER_ACTIVITY	2110	ETFDH	electron-transferring-flavoprotein dehydrogenase	1.79156	0.00020707
GO_ELECTRON_CARRIER_ACTIVITY	8608	RDH16	retinol dehydrogenase 16 (all-trans)	1.6667	0.00456152
GO_ELECTRON_CARRIER_ACTIVITY	4129	MAOB	monoamine oxidase B	1.63753	0.00256494
GO_ELECTRON_CARRIER_ACTIVITY	2745	GLRX	glutaredoxin (thioltransferase)	2.03647	0.00779883
GO_TRANSMEMBRANE_TRANSPORTER_ACTIVITY	64849	SLC13A3	solute carrier family 13 (sodium-dependent dicarboxylate transporter), member 3	-2.01077	0.0410159
GO_TRANSMEMBRANE_TRANSPORTER_ACTIVITY	206358	SLC36A1	solute carrier family 36 (proton/amino acid symporter), member 1	-1.51107	0.000874713
GO_TRANSMEMBRANE_TRANSPORTER_ACTIVITY	284111	SLC13A5	solute carrier family 13 (sodium-dependent citrate transporter), member 5	-4.03895	0.0187846
GO_TRANSMEMBRANE_TRANSPORTER_ACTIVITY	8034	SLC25A16	solute carrier family 25 (mitochondrial carrier; Graves disease autoantigen), member 16	1.5307	0.00723438
GO_TRANSMEMBRANE_TRANSPORTER_ACTIVITY	347735	SERINC2	serine incorporator 2	1.50214	0.0111738
GO_TRANSMEMBRANE_TRANSPORTER_ACTIVITY	2621	GAS6	growth arrest-specific 6	-2.46472	0.00347183
GO_TRANSMEMBRANE_TRANSPORTER_ACTIVITY	55532	SLC30A10	solute carrier family 30, member 10	2.40434	0.0303675
GO_TRANSMEMBRANE_TRANSPORTER_ACTIVITY	9194	SLC16A7	solute carrier family 16, member 7 (monocarboxylic acid transporter 2)	2.01742	0.00544407
GO_TRANSMEMBRANE_TRANSPORTER_ACTIVITY	5825	ABCD3	ATP-binding cassette, sub-family D (ALD), member 3	1.6066	0.00182228
GO_TRANSMEMBRANE_TRANSPORTER_ACTIVITY	5244	ABCB4	ATP-binding cassette, sub-family B (MDR/TAP), member 4	1.52019	0.0043556
GO_TRANSMEMBRANE_TRANSPORTER_ACTIVITY	10955	SERINC3	serine incorporator 3	1.76767	0.0036202
GO_TRANSMEMBRANE_TRANSPORTER_ACTIVITY	9429	ABCG2	ATP-binding cassette, sub-family G (WHITE), member 2	1.80371	0.00152641
GO_TRANSMEMBRANE_TRANSPORTER_ACTIVITY	788	SLC25A20	solute carrier family 25 (carnitine/acylcarnitine translocase), member 20	2.22906	8.36687e-05
GO_TRANSMEMBRANE_TRANSPORTER_ACTIVITY	441168	FAM26F	family with sequence similarity 26, member F	-1.57913	0.0210457
GO_TRANSMEMBRANE_TRANSPORTER_ACTIVITY	1135	CHRNA2	cholinergic receptor, nicotinic, alpha 2 (neuronal)	3.05296	0.0083854
GO_TRANSMEMBRANE_TRANSPORTER_ACTIVITY	6566	SLC16A1	solute carrier family 16, member 1 (monocarboxylic acid transporter 1)	2.16833	0.0025293
GO_TRANSMEMBRANE_TRANSPORTER_ACTIVITY	201232	SLC16A13	solute carrier family 16, member 13 (monocarboxylic acid transporter 13)	1.5352	0.0127123
GO_TRANSMEMBRANE_TRANSPORTER_ACTIVITY	8671	SLC4A4	solute carrier family 4, sodium bicarbonate cotransporter, member 4	1.54624	0.00500488
GO_TRANSMEMBRANE_TRANSPORTER_ACTIVITY	8714	ABCC3	ATP-binding cassette, sub-family C (CFTR/MRP), member 3	2.14302	0.00354122
GO_TRANSMEMBRANE_TRANSPORTER_ACTIVITY	225	ABCD2	ATP-binding cassette, sub-family D (ALD), member 2	1.80682	0.0319243
GO_TRANSMEMBRANE_TRANSPORTER_ACTIVITY	85414	SLC45A3	solute carrier family 45, member 3	1.53003	0.0005615
GO_TRANSMEMBRANE_TRANSPORTER_ACTIVITY	246213	SLC17A8	solute carrier family 17 (sodium-dependent inorganic phosphate cotransporter), member 8	3.8658	0.00138831
GO_TRANSMEMBRANE_TRANSPORTER_ACTIVITY	634	CEACAM1	carcinoembryonic antigen-related cell adhesion molecule 1 (biliary glycoprotein)	1.50125	0.00224974
GO_TRANSMEMBRANE_TRANSPORTER_ACTIVITY	10568	SLC34A2	solute carrier family 34 (sodium phosphate), member 2	1.79881	0.0178249
GO_TRANSMEMBRANE_TRANSPORTER_ACTIVITY	488	ATP2A2	ATPase, Ca++ transporting, cardiac muscle, slow twitch 2	1.91167	0.00039089
GO_TRANSMEMBRANE_TRANSPORTER_ACTIVITY	6331	SCN5A	sodium channel, voltage-gated, type V, alpha subunit	-1.53853	0.000335994
GO_TRANSMEMBRANE_TRANSPORTER_ACTIVITY	9121	SLC16A5	solute carrier family 16, member 5 (monocarboxylic acid transporter 6)	1.6354	0.00113775
GO_TRANSMEMBRANE_TRANSPORTER_ACTIVITY	6584	SLC22A5	solute carrier family 22 (organic cation/carnitine transporter), member 5	2.19767	0.00263368
GO_SULFUR_COMPOUND_BINDING	2950	GSTP1	glutathione S-transferase pi 1	1.63912	0.0200483
GO_SULFUR_COMPOUND_BINDING	34	ACADM	acyl-CoA dehydrogenase, C-4 to C-12 straight chain	1.99474	0.000454357
GO_SULFUR_COMPOUND_BINDING	4969	OGN	osteoglycin	1.73328	0.024935
GO_SULFUR_COMPOUND_BINDING	26061	HACL1	2-hydroxyacyl-CoA lyase 1	2.10651	0.000775308
GO_SULFUR_COMPOUND_BINDING	51	ACOX1	acyl-CoA oxidase 1, palmitoyl	1.66627	0.00242207
GO_SULFUR_COMPOUND_BINDING	283	ANG	angiogenin, ribonuclease, RNase A family, 5	-2.27736	0.0190897
GO_SULFUR_COMPOUND_BINDING	2944	GSTM1	glutathione S-transferase mu 1	1.53353	0.0245594
GO_SULFUR_COMPOUND_BINDING	4329	ALDH6A1	aldehyde dehydrogenase 6 family, member A1	1.55718	0.0130025
GO_SULFUR_COMPOUND_BINDING	3030	HADHA	hydroxyacyl-CoA dehydrogenase/3-ketoacyl-CoA thiolase/enoyl-CoA hydratase (trifunctional protein), alpha subunit	1.54394	0.000306471
GO_SULFUR_COMPOUND_BINDING	84129	ACAD11	acyl-CoA dehydrogenase family, member 11	1.67146	0.000646651
GO_SULFUR_COMPOUND_BINDING	33	ACADL	acyl-CoA dehydrogenase, long chain	1.72816	0.0028287
GO_SULFUR_COMPOUND_BINDING	27329	ANGPTL3	angiopoietin-like 3	1.50328	0.00531285
GO_SULFUR_COMPOUND_BINDING	10455	ECI2	enoyl-CoA delta isomerase 2	1.74498	0.00178871
GO_SULFUR_COMPOUND_BINDING	5270	SERPINE2	serpin peptidase inhibitor, clade E (nexin, plasminogen activator inhibitor type 1), member 2	1.62119	0.00408842
GO_FATTY_ACYL_COA_BINDING	34	ACADM	acyl-CoA dehydrogenase, C-4 to C-12 straight chain	1.99474	0.000454357
GO_FATTY_ACYL_COA_BINDING	51	ACOX1	acyl-CoA oxidase 1, palmitoyl	1.66627	0.00242207
GO_FATTY_ACYL_COA_BINDING	33	ACADL	acyl-CoA dehydrogenase, long chain	1.72816	0.0028287
GO_FATTY_ACYL_COA_BINDING	84129	ACAD11	acyl-CoA dehydrogenase family, member 11	1.67146	0.000646651
GO_FATTY_ACYL_COA_BINDING	10455	ECI2	enoyl-CoA delta isomerase 2	1.74498	0.00178871
GO_FATTY_ACYL_COA_BINDING	3030	HADHA	hydroxyacyl-CoA dehydrogenase/3-ketoacyl-CoA thiolase/enoyl-CoA hydratase (trifunctional protein), alpha subunit	1.54394	0.000306471
GO_FATTY_ACYL_COA_BINDING	4329	ALDH6A1	aldehyde dehydrogenase 6 family, member A1	1.55718	0.0130025
GO_THIOLESTER_HYDROLASE_ACTIVITY	10965	ACOT2	acyl-CoA thioesterase 2	4.63269	0.0062207
GO_THIOLESTER_HYDROLASE_ACTIVITY	283927	NUDT7	nudix (nucleoside diphosphate linked moiety X)-type motif 7	-2.17292	0.0458252
GO_THIOLESTER_HYDROLASE_ACTIVITY	25953	PNKD	paroxysmal nonkinesigenic dyskinesia	1.52536	0.00310289
GO_THIOLESTER_HYDROLASE_ACTIVITY	134526	ACOT12	acyl-CoA thioesterase 12	1.89251	0.0005775
GO_THIOLESTER_HYDROLASE_ACTIVITY	122970	ACOT4	acyl-CoA thioesterase 4	3.38432	0.00368984
GO_THIOLESTER_HYDROLASE_ACTIVITY	4329	ALDH6A1	aldehyde dehydrogenase 6 family, member A1	1.55718	0.0130025
GO_THIOLESTER_HYDROLASE_ACTIVITY	641371	ACOT1	acyl-CoA thioesterase 1	9.21084	0.000784115
GO_TETRAPYRROLE_BINDING	3162	HMOX1	heme oxygenase (decycling) 1	1.56257	0.0232432
GO_TETRAPYRROLE_BINDING	6999	TDO2	tryptophan 2,3-dioxygenase	1.54417	0.00989422
GO_TETRAPYRROLE_BINDING	1582	CYP8B1	cytochrome P450, family 8, subfamily B, polypeptide 1	3.55399	0.00785468
GO_TETRAPYRROLE_BINDING	1576	CYP3A4	cytochrome P450, family 3, subfamily A, polypeptide 4	2.18741	0.000111938
GO_TETRAPYRROLE_BINDING	6391	SDHC	succinate dehydrogenase complex, subunit C, integral membrane protein, 15kDa	1.62795	0.00613126
GO_TETRAPYRROLE_BINDING	51302	CYP39A1	cytochrome P450, family 39, subfamily A, polypeptide 1	2.42464	0.00251403
GO_TETRAPYRROLE_BINDING	1580	CYP4B1	cytochrome P450, family 4, subfamily B, polypeptide 1	1.52747	0.0026546
GO_TETRAPYRROLE_BINDING	847	CAT	catalase	1.60446	0.00171348
GO_TETRAPYRROLE_BINDING	9572	NR1D1	nuclear receptor subfamily 1, group D, member 1	-2.71243	0.00139493
GO_TETRAPYRROLE_BINDING	1595	CYP51A1	cytochrome P450, family 51, subfamily A, polypeptide 1	-2.46406	0.00328032
GO_TETRAPYRROLE_BINDING	6821	SUOX	sulfite oxidase	1.57706	0.00517778
