# Supplementary figures and images for: The polysaccharide–peptide complex from mushroom Cordyceps militaris ameliorates atherosclerosis by modulating the lncRNA–miRNA–mRNA axis
Source: Royal Society of Chemistry journal article supplement (doi:10.1039/d1fo03285b), 2022-01-01

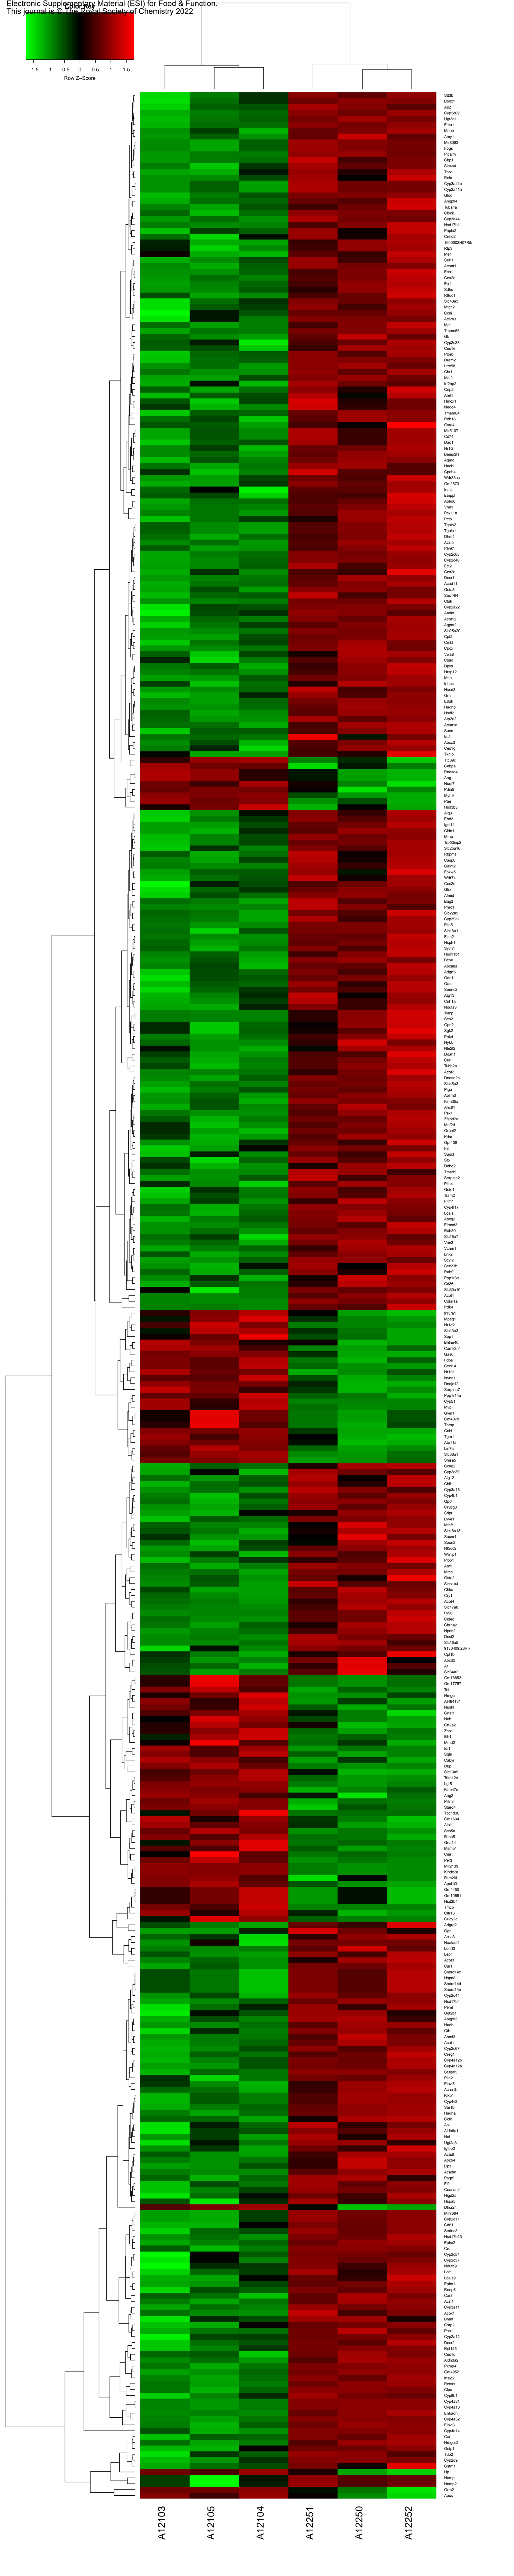

Supplement: d1fo03285b2.pdf [file d1fo03285b2.pdf]

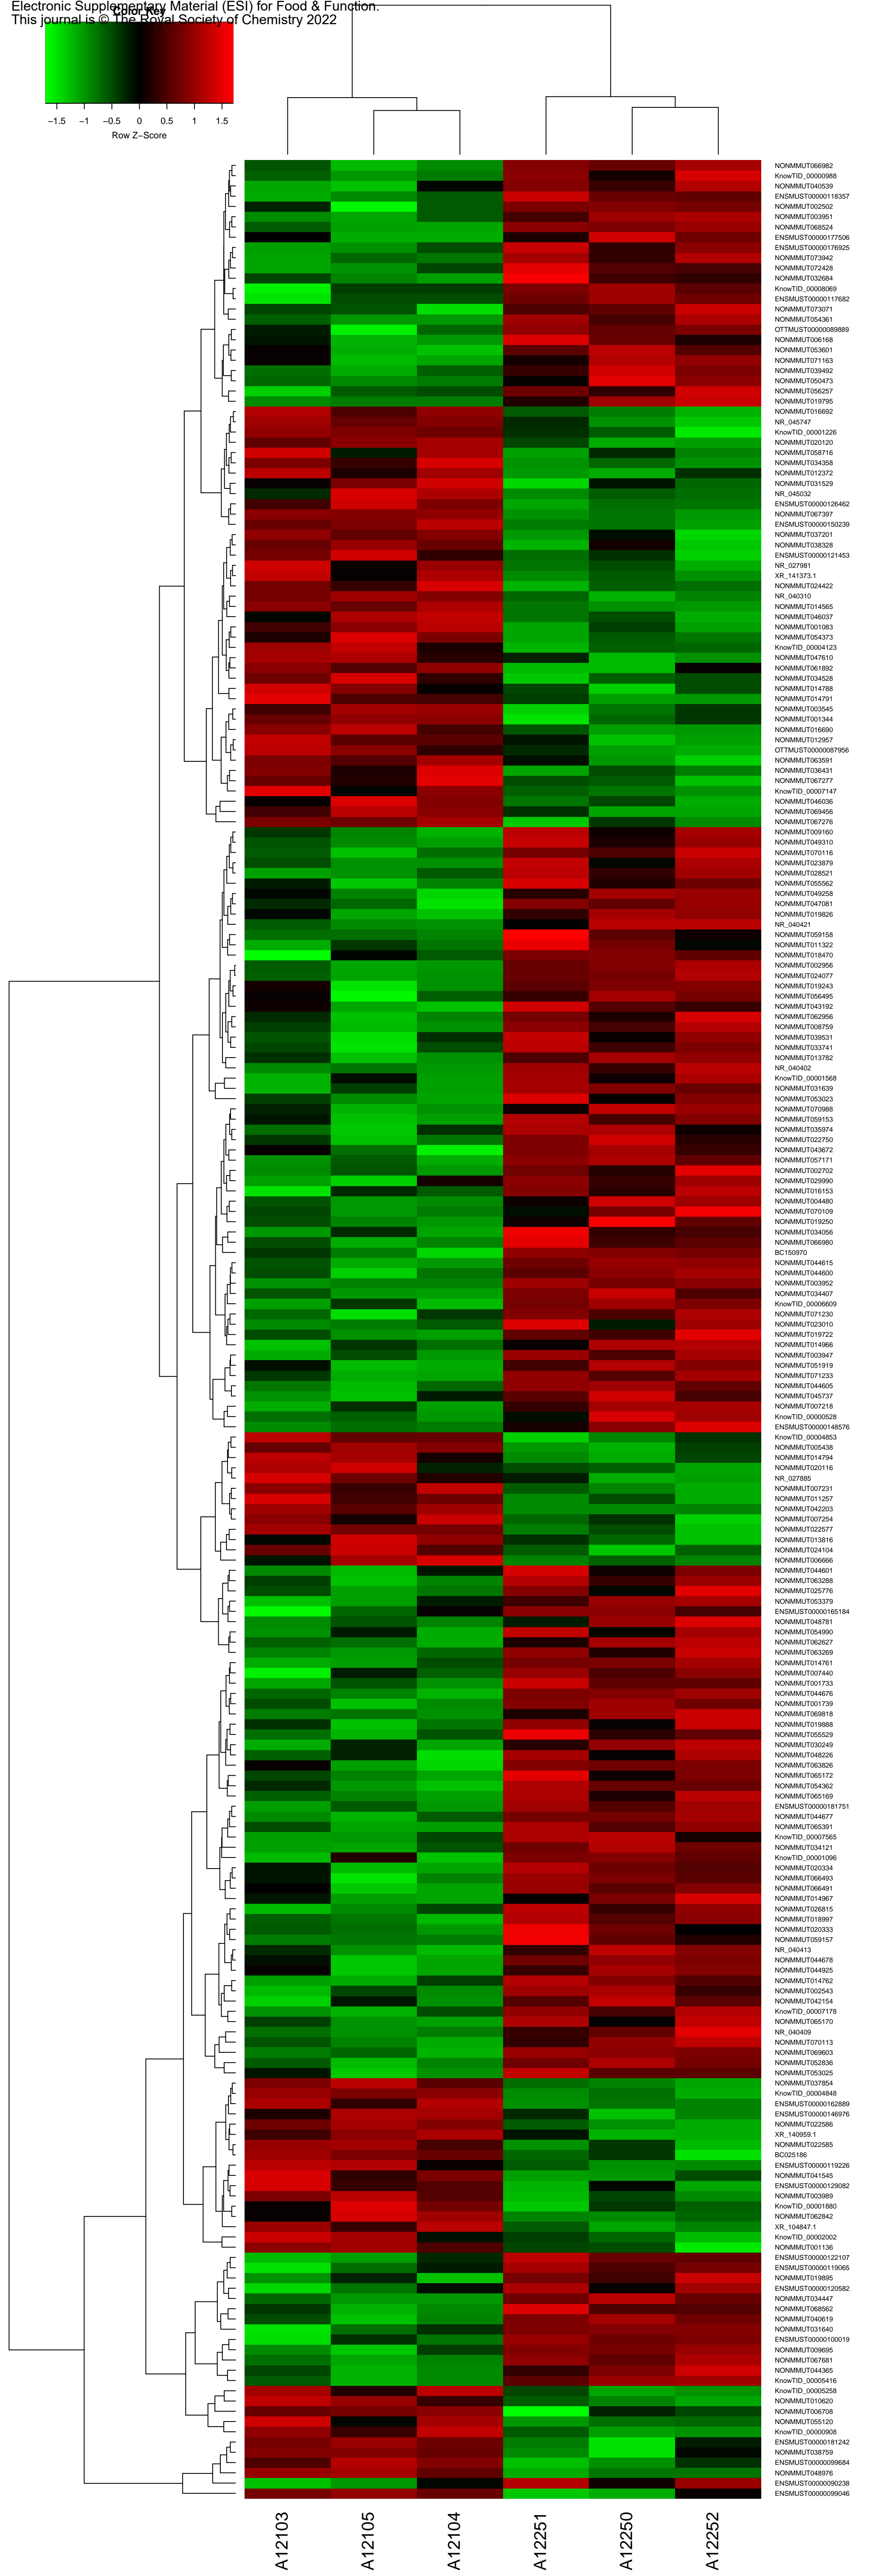

Supplement: d1fo03285b4.pdf [file d1fo03285b4.pdf]

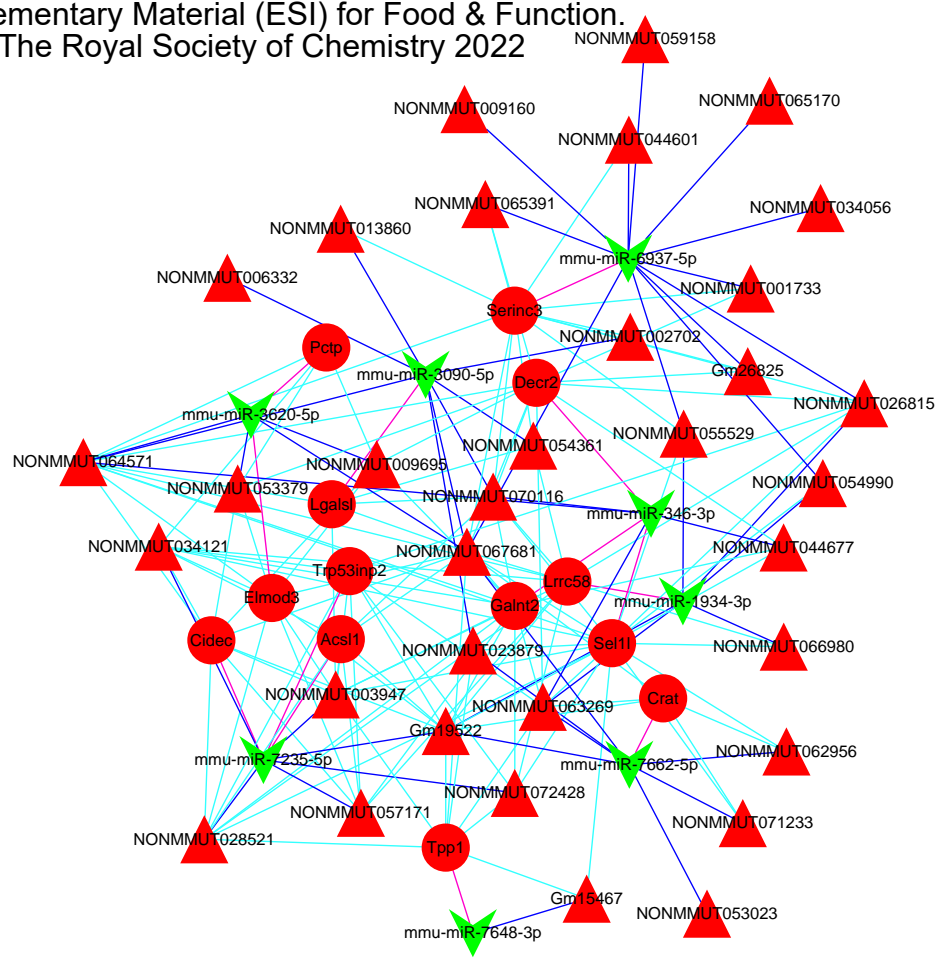

Supplement: d1fo03285b8.pdf [file d1fo03285b8.pdf]
